# Supplementary material for: Food Compass is a nutrient profiling system using expanded characteristics for assessing healthfulness of foods
Source: Springer Nature journal article supplement (doi:10.1038/s43016-021-00381-y), 2021-10-14
Supplement: 43016_2021_381_MOESM1_ESM.pdf [file 43016_2021_381_MOESM1_ESM.pdf]

---

**Supplementary information**

---

**Food Compass is a nutrient profiling system using expanded characteristics for assessing healthfulness of foods**

---

In the format provided by the authors and unedited

## **Supplementary Materials**

### **Food Compass: a Novel Nutrient Profiling System for Assessing the Healthfulness of Foods**

Dariush Mozaffarian\*, MD DrPH, Naglaa H. El-Abbadi\*, PhD, Meghan O’Hearn, MS, Josh Marino, PhD, William A. Masters, PhD, Paul Jacques, ScD, Peilin Shi, PhD, Jeff Blumberg\*, PhD, Renata Micha\*, RD PhD (\*contributed equally)

#### **Supplementary Text 1. Details on scoring the Food Compass in NHANES**

Due to absence of data in FNDDS, 7 Food Compass attributes could not be scored in the NHANES dataset: iodine; trans fat, and 5 artificial additives with a half-weight each (artificial sweeteners, flavors, or colors, partially-hydrogenated oils, interesterified or fully hydrogenated oils, high fructose corn syrup, MSG). Thus, in the FNDDS dataset, scores were calculated utilizing 47 of the 54 Food Compass attributes across the 9 domains. Information on flavonoid content was merged from the USDA Flavonoid database (n=5,632 items) that represents a subset of foods in FNDDS 2015-2016 (n=8,032 items). Missing flavonoid contents for 2,400 foods were imputed based on the food subcategory-specific average flavonoid values for each of 150 food groups in What We Eat in America. For more details on scoring, see Table S3.

#### **Supplementary Text 2. A comparison of sweet potato chips (a savory snack) vs. bulgur (a whole grain)**

The Food Compass Score (FCS) for bulgur (a whole grain) and sweet potato chips (a savory snack) were both 68. In dietary guidance, whole grains are generally recommended, and savory snacks are generally considered as something to limit. The advantage of a NPS is the ability to more finely assess the healthfulness of these foods, both overall and in comparison to each other.

First, it is informative to assess the FCS for some other iterations of sweet potato in NHANES (Table S7):

- Sweet potato, baked, peel not eaten, made with oil: 82
- Sweet potato fries, from fresh, baked: 82
- Sweet potato, baked, peel eaten, fat not added in cooking: 78
- Sweet potato fries, frozen, fried: 69

These scores exhibit a nuanced gradation of scoring across these different processing and preparation methods.

Nutritional information for one serving (28 g, 150 kcal) of sweet potato chips is below:

- Carbs: 16 g (including 2.5 g of naturally occurring sugar)
- Protein: 0.8 gram
- Fat: 9 g, with 88% being unsaturated fats
- Fiber: 2.5 g
- Potassium: 261 mg
- Sodium: 65 mg
- Vitamin A: 37% RDI
- Vitamin E: 18% RDI
- Niacin: 4% RDI
- Vitamin B5: 8% RDI
- Vitamin B6: 12% RDI
- Iron: 3% RDI
- Good source of different carotenoids and phenolic acids
- Glycemic index: ~75 (fried sweet potatoes)

Based on its nutritional profile, the American Diabetes Association highlights sweet potatoes as a "diabetes superfood," noting its fiber and vitamin A contents, as well as being a good source of vitamin C and potassium. (<https://www.diabetes.org/healthy-living/recipes-nutrition/eating-well/diabetes-superfoods>)

In comparison, a serving (one cup, 150 kcal) of cooked bulgur contains:

- Carbs: 33 grams (mostly starch)
- Protein: 6 grams
- Fat: 0 grams
- Fiber: 8 grams
- Potassium: 123 mg
- Sodium: 395 mg
- Folate: 8% RDI
- Thiamine: 9% RDI
- Vitamin B6: 12% RDI
- Niacin: 11% RDI
- Magnesium: 14% RDI
- Iron: 10% RDI
- Glycemic index: ~50

Considering macronutrients, bulgur contains more protein and fiber but also much more starch compared with sweet potato chips; whereas sweet potato chips have much higher healthy fats with less starch and protein, and some fiber. Vitamin contents are broadly comparable in many ways, except for sweet potatoes being a high source of vitamin A; while conversely estimated glycemic index is higher for sweet potato chips. Sweet potato chips are an excellent source of potassium, with low sodium; while bulgur contains much more sodium.

In many ways, this sample contrast helps inform the utility and value of the Food Compass. Based on dietary guidelines, which by nature make recommendations about broad food categories, consumers would be told to seek bulgur and avoid sweet potato chips. Based on more rigorous nutritional evaluation, however, these two products appear relatively similar overall – suggesting the Food Compass provides important new information to consumers.

Finally, it is informative to compare the FCS for sweet potato chips to other major NPS. Sweet potato chips are defined by the NOVA classification as ultraprocessed (category 4) and by Nutri-Score as category C – each worse than the FCS. And, sweet potato chips are characterized by the Health Star Rating as a 4.5 – much higher than the FCS (comparable to a FCS of 90). Based on the overall nutritional profile of sweet potato chips, the FCS of 69 could be reasonably interpreted as providing the best overall guidance on healthfulness of this food.

**Supplementary Table 1. Characteristics of 7 widely-used exemplar Nutrient Profiling Systems of diverse origins, methodologies, organizations, and regional coverage.\***

| <b>Nutrient Profiling System</b>         | <b>Country / Developer</b>                | <b>Score Type</b>         | <b>Consistent Attributes and Scoring for Different Food Categories (if inconsistent, no. of different food categories)</b> | <b>No. (Range) of Unique Attributes Assessed For Any Food Item†</b> |
|------------------------------------------|-------------------------------------------|---------------------------|----------------------------------------------------------------------------------------------------------------------------|---------------------------------------------------------------------|
| <b>Guiding Stars</b>                     | USA / Industry (Hannaford/Ahold-Delhaize) | Categorical (4 groups)    | No (4 food categories)                                                                                                     | 9                                                                   |
| <b>Nutri-Score</b>                       | Europe / Government                       | Categorical (5 groups) ‡  | No (4 food categories)                                                                                                     | 7                                                                   |
| <b>Health Star Rating</b>                | Australia & New Zealand; Government       | Categorical (10 groups) ‡ | No (6 food categories)                                                                                                     | 7                                                                   |
| <b>Nordic Keyhole</b>                    | Scandinavia / Government                  | Binary                    | No (33 food categories)                                                                                                    | 0 to 5                                                              |
| <b>Singapore Healthier Choice Symbol</b> | Singapore / Government                    | Binary                    | No (14 food categories)                                                                                                    | 2 to 8                                                              |
| <b>Waqeya</b>                            | United Arab Emirates / Government         | Binary                    | No (19 food categories)                                                                                                    | 2 to 8                                                              |
| <b>Nestle Nutrient Profiling System</b>  | Switzerland / Industry (Nestle)           | Numeric                   | No (32 food categories)                                                                                                    | 11                                                                  |

\*Other major NPS, such as the 2004 UK system, were reviewed but not focused upon because these have generally been used as the foundation for several of the newer NPS included here. For example, the Health Star Rating was based on (and aimed to improve) the 2004 UK NPS and is also used by the Access to Nutrition Index (ATNI), a prominent new effort to use an NPS to grade multinational food products globally. The updated 2020 version of the Health Star Rating was used in all our analyses. Most of these scores are intended to score foods as purchased (i.e., in the package), not as consumed (i.e., how foods are combined and prepared in homes, coffee shops, cafeterias, or restaurants). Several also exclude foods without mandatory nutrient labeling, like produce, meats, and packaged foods from small local producers. However, validation of these scores against health outcomes has necessarily assessed all foods and beverages as consumed (see main manuscript, Discussion).

† In some of these NPS, the attributes assessed varied across different food categories; for these NPS, the range of the number of attributes in each food category is shown. Scoring details for each NPS can be found as follows: Guiding Stars: [http://guidingstars.com/wp-content/uploads/2018/02/Guiding-Stars-White-Paper\\_US-Version\\_revised-final-2-1-2018-1.pdf](http://guidingstars.com/wp-content/uploads/2018/02/Guiding-Stars-White-Paper_US-Version_revised-final-2-1-2018-1.pdf); Nutri-Score: [http://www.euro.who.int/\\_\\_data/assets/pdf\\_file/0006/357243/PHP-Vol3-Issue4-December-2017-rus.pdf#page=178](http://www.euro.who.int/__data/assets/pdf_file/0006/357243/PHP-Vol3-Issue4-December-2017-rus.pdf#page=178); Health Star Rating: <http://healthstarrating.gov.au/internet/healthstarrating/publishing.nsf/Content/guide-for-industry>; Singapore Healthier Choice Symbol: [https://www.hpb.gov.sg/docs/default-source/default-document-library/hcs-guidelines-\(january-2018\)](https://www.hpb.gov.sg/docs/default-source/default-document-library/hcs-guidelines-(january-2018)); Nordic Keyhole: <https://www.livsmedelsverket.se/globalassets/om-oss/lagstiftning/livsmedelsinfo-till-konsum---markning/livsfs-2015-1-particular-symbol-eng.pdf>; Waqeya: <https://weqaya.doh.gov.ae/en-us/UnderstandingYourScore/aboutnutrition.aspx>; Nestle Nutrient Profiling System: [https://www.nestle.com/sites/default/files/asset-library/documents/library/documents/nutrition\\_health\\_wellness/nestle-nutritional-profiling-system.pdf](https://www.nestle.com/sites/default/files/asset-library/documents/library/documents/nutrition_health_wellness/nestle-nutritional-profiling-system.pdf)

‡ The Nutri-Score and Health Star Rating first generate a numerical score which then is used to classify a product into a category.

## Supplementary Table 2. Summary of review of nutrient content requirements for U.S. health claims.

### 101.14 Health claims: general requirements

Disqualifying nutrient levels: Levels of total fat, sat fat, cholesterol, or sodium in a food above which the food will be disqualified from making a claim

Per reference amounts customarily consumed, per label serving size, and, only for foods with reference amounts customarily consumed of 30g or less, or 2 tbsp or less, per 50g

Fat 13 g

Sat fat 4 g

Cholesterol 60 mg

Sodium 480 mg

Levels for a meal product (see 101.13 (l)) per label serving size

Fat 26 g

Sat fat 8 g

Cholesterol 120 mg

Sodium 960 mg

Levels for a main dish (see 101.13 (m)) per label serving size

Fat 19.5 g

Sat fat 6 g

Cholesterol 90 mg

Sodium 720 mg

### 101.54 Nutrient content claims for "good source," "high," "more," and "high potency."

$\geq 20\%$  "High" - if food contains 20% or more of the RDI or the DRV per reference amount customarily consumed

10-19% "Good source" - if food contains 10-19% of the RDI or the DRV per reference amount customarily consumed

$> 10\%$  More, fortified, enriched, added, extra, and plus - as relative terms to describe the level of protein, vitamins, minerals, dietary fiber or potassium - if food contains at least 10% more of the RDI for vitamins or minerals or of the DRV for protein, dietary, fiber, or potassium (expressed as a % of the DV) per 100g of food than an appropriate reference food

$\geq 100\%$  "High potency" - if the product contains 100% or more of the RDI for at least two-thirds of the vitamins and minerals that are listed and are present in the product at 2% or more of the RDI

\* Nutrient content claims using the term 'antioxidant'

RDI established for each of the nutrients

Nutrients that are the subject of the claim must have recognized antioxidant activity (see g.2)

### 101.56 Nutrient content claims for "light" or "lite"

If the food derives 50% or more of its calories from fat, its fat content is reduced by 50% or more per reference amount customarily consumed compared to an appropriate reference food

If the food derives less than 50% of calories from fat:

Number of calories is reduced at least 33.3% per reference amount compared to appropriate reference

fat content is reduced by 50% or more compared to the reference food

### 101.61 Nutrient content claims for the sodium content of foods (generally per 100g or per reference amount)

$< 5\text{mg}$  Terms of sodium free (variations thereof)

$< 35\text{mg}/100\text{g}$  Terms of very low sodium

$< 140\text{mg}/100\text{g}$  Terms of low sodium

$\geq 25\%$  lower than ref Terms of reduced sodium

Salt is NOT synonymous with sodium, salt refers to sodium chloride.

Terms around salt free, unsalted, low salt, etc.

### 101.62 Nutrient content claims for fat, fatty acid, and cholesterol content of foods:

See: <https://www.accessdata.fda.gov/scripts/cdrh/cfdocs/cfcfr/cfrsearch.cfm?fr=101.62>

### 101.65 Implied nutrient content claims and related label statements

You may use the term "healthy" or related terms (e.g., "health," "healthful," "healthfully," "healthfulness," "healthier," "healthiest," "healthily," and "healthiness") as an implied nutrient content claim on the label or in labeling of a food that is useful in creating a diet that is consistent with dietary recommendations if:

| If the food is...                                                                                                    | The fat level must be...                                          | The saturated fat level must be...               | The cholesterol level must be...                                     | The food must contain...                                                                                                                                                                      |
|----------------------------------------------------------------------------------------------------------------------|-------------------------------------------------------------------|--------------------------------------------------|----------------------------------------------------------------------|-----------------------------------------------------------------------------------------------------------------------------------------------------------------------------------------------|
| (A) A raw fruit or vegetable                                                                                         | Low fat as defined in §101.62(b)(2)                               | Low saturated fat as defined in §101.62(c)(2)    | The disclosure level for cholesterol specified in §101.13(h) or less | N/A                                                                                                                                                                                           |
| (B) A single-ingredient or a mixture of frozen or canned fruits and vegetables <sup>1</sup>                          | Low fat as defined in §101.62(b)(2)                               | Low saturated fat as defined in §101.62(c)(2)    | The disclosure level for cholesterol specified in §101.13(h) or less | N/A                                                                                                                                                                                           |
| (C) An enriched cereal-grain product that conforms to a standard of identity in part 136, 137 or 139 of this chapter | Low fat as defined in §101.62(b)(2)                               | Low saturated fat as defined in §101.62(c)(2)    | The disclosure level for cholesterol specified in §101.13(h) or less | N/A                                                                                                                                                                                           |
| (D) A raw, single-ingredient seafood or game meat                                                                    | Less than 5 grams (g) total fat per RA <sup>2</sup> and per 100 g | Less than 2 g saturated fat per RA and per 100 g | Less than 95 mg cholesterol per RA and per 100 g                     | At least 10 percent of the RDI <sup>3</sup> or the DRV <sup>4</sup> per RA of one or more of vitamin A, vitamin C, calcium, iron, protein, or fiber                                           |
| (E) A meal product as defined in §101.13(l) or a main dish product as defined in §101.13(m)                          | Low fat as defined in §101.62(b)(3)                               | Low saturated fat as defined in §101.62(c)(3)    | 90 mg or less cholesterol per LS <sup>5</sup>                        | At least 10 percent of the RDI or DRV per LS of two nutrients (for a main dish product) or of three nutrients (for a meal product) of: vitamin A, vitamin C, calcium, iron, protein, or fiber |
| (F) A food not specifically listed in this table                                                                     | Low fat as defined in §101.62(b)(2)                               | Low saturated fat as defined in §101.62(c)(2)    | The disclosure level for cholesterol specified in §101.13(h) or less | At least 10 percent of the RDI or the DRV per RA of one or more of vitamin A, vitamin C, calcium, iron, protein or fiber                                                                      |

| If the food is...                                                                           | The sodium level must be...                 |
|---------------------------------------------------------------------------------------------|---------------------------------------------|
| (A) A food with a RA that is greater than 30 g or 2 tablespoons (tbsp.)                     | 480 mg or less sodium per RA and per LS     |
| (B) A food with a RA that is equal to or less than 30 g or 2 tbsp.                          | 480 mg or less sodium per 50 g <sup>1</sup> |
| (C) A meal product as defined in §101.13(l) or a main dish product as defined in §101.13(m) | 600 mg or less sodium per LS                |

#### 101.71 Health claims not authorized

Dietary fiber and CVD

Zinc and immune function in the elderly

#### 101.72 Health Claims: calcium, vitamin D, and osteoporosis

Relationship between calcium, vit D, and osteoporosis: inadequate intake contributes to low peak bone mass - a risk factor for osteoporosis

Significance of calcium or calcium and vit D: Increasing calcium shown to have beneficial effects on bone health, independent of dietary vit D, but vit D is most effective when calcium intake is adequate

Requirements: see 101.14

**Supplementary Table 2. Summary of review of nutrient content requirements for U.S. health claims. (continued)**

| <b>Food Category</b>                                       | <b>Attribute</b>                           | <b>Health Claim Requirements</b>                                                                                                                                                                                                                                                                                                                                                                                                                                                            |
|------------------------------------------------------------|--------------------------------------------|---------------------------------------------------------------------------------------------------------------------------------------------------------------------------------------------------------------------------------------------------------------------------------------------------------------------------------------------------------------------------------------------------------------------------------------------------------------------------------------------|
| <b>Standard Certification<br/>(FDA-regulated products)</b> | Total Fat                                  | Less than 6.5 g                                                                                                                                                                                                                                                                                                                                                                                                                                                                             |
|                                                            | Saturated Fat                              | 1 g or less and 15% or less calories from saturated fat                                                                                                                                                                                                                                                                                                                                                                                                                                     |
|                                                            | Trans Fat                                  | Less than 0.5 g (also per label serving*). Products containing partially hydrogenated oils are not eligible for certification.                                                                                                                                                                                                                                                                                                                                                              |
|                                                            | Cholesterol                                | 20 mg or less                                                                                                                                                                                                                                                                                                                                                                                                                                                                               |
|                                                            | Sodium                                     | One of four sodium limits applies depending on the particular food category: up to 140 mg, 240 mg or 360 mg per label serving*, or 480 mg per label serving and per RACC*. See Sodium Limits by Category for details.                                                                                                                                                                                                                                                                       |
|                                                            | Beneficial Nutrients (naturally occurring) | 10% or more of the Daily Value of 1 of 6 nutrients (vitamin A, vitamin C, iron, calcium, protein or dietary fiber)                                                                                                                                                                                                                                                                                                                                                                          |
| <b>Additional Food Category-Specific Requirements</b>      |                                            |                                                                                                                                                                                                                                                                                                                                                                                                                                                                                             |
| <b>Canned Fruits/Vegetables</b>                            | Ingredients                                | No “heavy syrup” (including potatoes and sweet potatoes)                                                                                                                                                                                                                                                                                                                                                                                                                                    |
| <b>Frozen Fruit</b>                                        | Added Sugars                               | 100% Fruit (no added sugar)                                                                                                                                                                                                                                                                                                                                                                                                                                                                 |
| <b>Fruit/Vegetable Juice</b>                               | Added Sugars                               | 100% juice (or 100% juice plus water) with no added sugars/sweeteners (excludes non-nutritive sweeteners)                                                                                                                                                                                                                                                                                                                                                                                   |
|                                                            | Calories                                   | 120 calories or less per 8 fl oz*                                                                                                                                                                                                                                                                                                                                                                                                                                                           |
|                                                            | Positive Nutrients                         | 10% Daily Value or greater for 3 nutrients for which a Daily Value exists. At least one of these beneficial nutrients must satisfy the beneficial nutrient requirement listed above.                                                                                                                                                                                                                                                                                                        |
| <b>Grain-Based Products</b>                                | Fiber and Total Sugars                     | All grain-based products must be a good source of dietary fiber (10% or more Daily Value per RACC); and contain 7 g or less Total Sugars per serving if the product is a good source of dietary fiber (10-19% Daily Value per RACC); or 9 g or less Total Sugars per serving if the product is an excellent source of dietary fiber (20% or more Daily Value per RACC). Sugars from pieces of fruit do not count toward the sugars allowance but amount(s) and source(s) must be disclosed. |
|                                                            | Natural Sugars                             | If product used the new Nutrition Facts label format, product must be a good source of dietary fiber (10% or more Daily Value per RACC), and contain 8 g or less of added sugar per serving. If product uses the old Nutrition Facts label format, the requirements for all other grain-based products apply.                                                                                                                                                                               |
| <b>Grain-Based Snack Bars</b>                              | Fiber and added sugars                     |                                                                                                                                                                                                                                                                                                                                                                                                                                                                                             |
| <b>Milk and Milk Alternatives</b>                          | Calories                                   | 130 calories or less per 8 fl oz*                                                                                                                                                                                                                                                                                                                                                                                                                                                           |
| <b>Smoothies</b>                                           | Calories                                   | 200 calories or less per 8oz or 300 calories or less per 9-20 oz. (upper limit for size)                                                                                                                                                                                                                                                                                                                                                                                                    |
|                                                            | Added Sugars                               | 2 teaspoons (8 g) or less added sugar per serving                                                                                                                                                                                                                                                                                                                                                                                                                                           |
|                                                            | Whole Foods                                | Must contain at least one serving of whole fruit or vegetable (not including any added juice or puree concentrate, which will be counted as added sugars) or dairy/dairy alternatives (e.g. nut/grain/soy-based milks)                                                                                                                                                                                                                                                                      |
|                                                            | Caffeine                                   | Caffeine and other stimulant additives are not permitted. Caffeine occurring naturally in other ingredients (e.g. green tea) is permitted.                                                                                                                                                                                                                                                                                                                                                  |
| <b>Snacks</b>                                              | Added Sugars                               | 5 grams or less added sugar per serving. Naturally occurring sugars do not count toward this limit Grain-Based Snacks: Must be a good source of dietary fiber (at least 10% Daily Value per RACC)                                                                                                                                                                                                                                                                                           |

|                                                                             |                                                                                                                    |                                                                                                                                                     |                                                                                                                                                                                                                                                                                                                                                                                                                                                                   |
|-----------------------------------------------------------------------------|--------------------------------------------------------------------------------------------------------------------|-----------------------------------------------------------------------------------------------------------------------------------------------------|-------------------------------------------------------------------------------------------------------------------------------------------------------------------------------------------------------------------------------------------------------------------------------------------------------------------------------------------------------------------------------------------------------------------------------------------------------------------|
| <b>Yogurt</b>                                                               | Total Sugars                                                                                                       | 20 g or less total sugar per standard 6 oz serving.                                                                                                 |                                                                                                                                                                                                                                                                                                                                                                                                                                                                   |
|                                                                             | <b>Meat and Seafood:<br/>Standard Certification<br/>"Extra Lean"</b>                                               | Total Fat                                                                                                                                           | Less than 5 g (also per 100 g*)                                                                                                                                                                                                                                                                                                                                                                                                                                   |
|                                                                             |                                                                                                                    | Saturated Fat                                                                                                                                       | Less than 2 g (also per 100 g*)                                                                                                                                                                                                                                                                                                                                                                                                                                   |
|                                                                             |                                                                                                                    | Trans Fat                                                                                                                                           | Less than 0.5 g (also per label serving*). Products containing partially hydrogenated oils are not eligible for certification.                                                                                                                                                                                                                                                                                                                                    |
|                                                                             |                                                                                                                    | Cholesterol                                                                                                                                         | Less than 95 mg (also per 100 g*)                                                                                                                                                                                                                                                                                                                                                                                                                                 |
|                                                                             |                                                                                                                    | Sodium                                                                                                                                              | One of four sodium limits applies depending on the particular food category: up to 140 mg, 240 mg or 360 mg per label serving*, or 480 mg per label serving and per RACC*. See Sodium Limits by Category for details.                                                                                                                                                                                                                                             |
| Beneficial Nutrients (naturally occurring)                                  | 10% or more of the Daily Value of 1 of 6 nutrients (vitamin A, vitamin C, iron, calcium, protein or dietary fiber) |                                                                                                                                                     |                                                                                                                                                                                                                                                                                                                                                                                                                                                                   |
| <b>Processed Meats</b>                                                      | Preservation                                                                                                       | Preservation methods that include smoking, curing, salting or other chemical preservatives including added nitrates/nitrites will not be allowed.   |                                                                                                                                                                                                                                                                                                                                                                                                                                                                   |
|                                                                             | <b>Main Dish &amp; Meal Products</b>                                                                               | Total Fat                                                                                                                                           | 3 g or less per 100 g of product* and 30% or less calories from fat                                                                                                                                                                                                                                                                                                                                                                                               |
| Saturated Fat                                                               |                                                                                                                    | 1 g or less per 100 g of product* and less than 10% calories from saturated fat                                                                     |                                                                                                                                                                                                                                                                                                                                                                                                                                                                   |
| Trans Fat                                                                   |                                                                                                                    | Less than 0.5 g (per label serving*). Products containing partially hydrogenated oils are not eligible for certification.                           |                                                                                                                                                                                                                                                                                                                                                                                                                                                                   |
| Cholesterol                                                                 |                                                                                                                    | 20 mg or less per 100 g of product* and 90 mg or less per label serving* for a main dish and 120 mg or less per label serving* for a meal           |                                                                                                                                                                                                                                                                                                                                                                                                                                                                   |
| Sodium                                                                      |                                                                                                                    | 600 mg or less (per label serving*)                                                                                                                 |                                                                                                                                                                                                                                                                                                                                                                                                                                                                   |
| Beneficial Nutrients (naturally occurring)                                  |                                                                                                                    | 10% or more of the Daily Value of 1 of 6 nutrients (vitamin A, vitamin C, iron, calcium, protein or dietary fiber) per the entire main dish or meal |                                                                                                                                                                                                                                                                                                                                                                                                                                                                   |
| <b>Whole Grains with Required Levels of Whole Grain &amp; Dietary Fiber</b> |                                                                                                                    | Food Types                                                                                                                                          | Certifiable grain-based products include breads, biscuits, cereals (ready-to-eat & cooked), crackers, pancakes, French toast, grains (single or multi) and their derivative flours/meals, waffles, muffins, sweet quick-type breads, and pastas.                                                                                                                                                                                                                  |
|                                                                             | Total Fat                                                                                                          | Less than 6.5 g                                                                                                                                     |                                                                                                                                                                                                                                                                                                                                                                                                                                                                   |
|                                                                             | Saturated Fat                                                                                                      | 1 g or less and 15% or less calories from saturated fat                                                                                             |                                                                                                                                                                                                                                                                                                                                                                                                                                                                   |
|                                                                             | Trans Fat                                                                                                          | Less than 0.5 g (also per label serving*). Products containing partially hydrogenated oils are not eligible for certification.                      |                                                                                                                                                                                                                                                                                                                                                                                                                                                                   |
|                                                                             | Cholesterol                                                                                                        | 20 mg or less                                                                                                                                       |                                                                                                                                                                                                                                                                                                                                                                                                                                                                   |
|                                                                             | Sodium                                                                                                             | One of four sodium limits applies depending on the particular food category                                                                         |                                                                                                                                                                                                                                                                                                                                                                                                                                                                   |
|                                                                             | Beneficial Nutrients (naturally occurring)                                                                         | 10% or more of the Daily Value of 1 of 6 nutrients (vitamin A, vitamin C, iron, calcium, protein or dietary fiber)                                  |                                                                                                                                                                                                                                                                                                                                                                                                                                                                   |
|                                                                             | Whole Grain Content                                                                                                | 51% or more by weight/RACC                                                                                                                          |                                                                                                                                                                                                                                                                                                                                                                                                                                                                   |
|                                                                             | Minimum Dietary Fiber (from whole grain only)                                                                      | 1.7 g/RACC of 30 g; 2.5 g/RACC of 45 g; 2.8 g/RACC of 50 g; or 3.0 g/RACC of 55 g                                                                   |                                                                                                                                                                                                                                                                                                                                                                                                                                                                   |
|                                                                             | Fiber and Total Sugars                                                                                             |                                                                                                                                                     | Must be a good source of dietary fiber (10% or more Daily Value per RACC), and contain 7 g or less Total Sugars per serving if the product is a good source of dietary fiber (10-19% Daily Value per RACC) or 9 g or less Total Sugars per serving If the product is an excellent source of dietary fiber (20% or more Daily Value per RACC). Sugars from pieces of fruit do not count toward the sugars allowance but amount(s) and source(s) must be disclosed. |
|                                                                             |                                                                                                                    |                                                                                                                                                     |                                                                                                                                                                                                                                                                                                                                                                                                                                                                   |



|                                                          |                                                                                               |                                                                                                                                                                                                                                                                                                                                                                                                                                                                                                                                                          |
|----------------------------------------------------------|-----------------------------------------------------------------------------------------------|----------------------------------------------------------------------------------------------------------------------------------------------------------------------------------------------------------------------------------------------------------------------------------------------------------------------------------------------------------------------------------------------------------------------------------------------------------------------------------------------------------------------------------------------------------|
| <b>Nuts (Whole or Chopped)</b>                           | Food types                                                                                    | Eligible nuts include almonds, hazelnuts, macadamia nuts, peanuts, pecans, pistachios, walnuts, some pine nuts                                                                                                                                                                                                                                                                                                                                                                                                                                           |
|                                                          | Total Fat                                                                                     | No limit                                                                                                                                                                                                                                                                                                                                                                                                                                                                                                                                                 |
|                                                          | Saturated Fat                                                                                 | 4 g or less (per 50 g only*) No limit for Macadamia Nuts                                                                                                                                                                                                                                                                                                                                                                                                                                                                                                 |
|                                                          | Trans Fat                                                                                     | Less than 0.5 g (also per label serving*)                                                                                                                                                                                                                                                                                                                                                                                                                                                                                                                |
|                                                          | Cholesterol                                                                                   | 0 mg per label serving*                                                                                                                                                                                                                                                                                                                                                                                                                                                                                                                                  |
|                                                          | Sodium                                                                                        | 140 mg or less per label serving*                                                                                                                                                                                                                                                                                                                                                                                                                                                                                                                        |
|                                                          | Beneficial Nutrients (naturally occurring)                                                    | 10% or more of the Daily Value of 1 of 6 nutrients (vitamin A, vitamin C, iron, calcium, protein or dietary fiber). Not applicable to walnuts.                                                                                                                                                                                                                                                                                                                                                                                                           |
|                                                          | Added Fats                                                                                    | Less than 0.5 g per RACC                                                                                                                                                                                                                                                                                                                                                                                                                                                                                                                                 |
|                                                          | Added Carbohydrates                                                                           | Less than 1 g per RACC<br>Amount(s) and source(s) of added fats and carbohydrates must be disclosed                                                                                                                                                                                                                                                                                                                                                                                                                                                      |
| <b>Fish with Required Level of Omega-3 Fatty Acids</b>   | Food Types                                                                                    | Fish may be certified under the Standard, Extra Lean or Fish categories, depending on the nutritional profile of the product.                                                                                                                                                                                                                                                                                                                                                                                                                            |
|                                                          | Total Fat                                                                                     | 16 g or less                                                                                                                                                                                                                                                                                                                                                                                                                                                                                                                                             |
|                                                          | Saturated Fat                                                                                 | 4 g or less                                                                                                                                                                                                                                                                                                                                                                                                                                                                                                                                              |
|                                                          | Trans Fat                                                                                     | Less than 0.5 g (also per label serving*)                                                                                                                                                                                                                                                                                                                                                                                                                                                                                                                |
|                                                          | Cholesterol                                                                                   | Less than 95 mg (also per 100 g*)                                                                                                                                                                                                                                                                                                                                                                                                                                                                                                                        |
|                                                          | Sodium                                                                                        | One of four sodium limits applies depending on the particular food category                                                                                                                                                                                                                                                                                                                                                                                                                                                                              |
|                                                          | Beneficial Nutrients (naturally occurring)                                                    | 10% or more of the Daily Value of 1 of 6 nutrients (vitamin A, vitamin C, iron, calcium, protein or dietary fiber)                                                                                                                                                                                                                                                                                                                                                                                                                                       |
|                                                          | Omega-3 Fatty Acids (EPA & DHA)                                                               | 500 mg or more per 85 g (3 oz cooked)                                                                                                                                                                                                                                                                                                                                                                                                                                                                                                                    |
|                                                          | Added Fats                                                                                    | Less than 0.5 g per RACC                                                                                                                                                                                                                                                                                                                                                                                                                                                                                                                                 |
| <b>Liquid Vegetable Oils and Oil Containing Products</b> | Added Carbohydrates                                                                           | Less than 1 g per RACC<br>Amount(s) and source(s) of added fats and carbohydrates must be disclosed<br>Must be pure Olive Oil, pure Canola Oil, pure Corn Oil, or vegetable oil blend containing 4 g or more Corn Oil per RACC. Canola Oil-Containing Products must have more than 4.75 g of Canola Oil per RACC. Corn Oil-Containing Products must have more than 4 g of Corn Oil per RACC. Olive Oil-Containing Products must have more than 6 g of Olive Oil per RACC. Soybean Oil-Containing Products must have more than 5 g of Canola Oil per RACC |
|                                                          | Food Types                                                                                    |                                                                                                                                                                                                                                                                                                                                                                                                                                                                                                                                                          |
|                                                          | Total Fat                                                                                     | no limit                                                                                                                                                                                                                                                                                                                                                                                                                                                                                                                                                 |
|                                                          | Saturated Fat                                                                                 |                                                                                                                                                                                                                                                                                                                                                                                                                                                                                                                                                          |
|                                                          | For Olive Oil, Corn Oil, Soybean Oil, and vegetable oil blends                                | 4 g or less (also per label serving*, not per 50g)                                                                                                                                                                                                                                                                                                                                                                                                                                                                                                       |
|                                                          | For Canola Oil                                                                                | 1 g or less (also per label serving*) and 15% or less calories from saturated fat                                                                                                                                                                                                                                                                                                                                                                                                                                                                        |
|                                                          | For Olive, Corn, and Soybean Oil-Containing Products                                          | 2 g or less (also per label serving*)                                                                                                                                                                                                                                                                                                                                                                                                                                                                                                                    |
|                                                          | Trans Fat                                                                                     | Less than 0.5 g (also per 50 g*). Products containing partially hydrogenated oils are not eligible for certification                                                                                                                                                                                                                                                                                                                                                                                                                                     |
|                                                          | Cholesterol                                                                                   | 20 mg or less (also per 50 g*)                                                                                                                                                                                                                                                                                                                                                                                                                                                                                                                           |
| Sodium                                                   | 0 mg for liquid oils. For Oil-Containing Products, see Sodium limits by Category for details. |                                                                                                                                                                                                                                                                                                                                                                                                                                                                                                                                                          |

|                                          |                       |                                                                                                                                                                                                                                                                                                                                                                                                |
|------------------------------------------|-----------------------|------------------------------------------------------------------------------------------------------------------------------------------------------------------------------------------------------------------------------------------------------------------------------------------------------------------------------------------------------------------------------------------------|
| <b>Grain-Based and Snack Bars</b>        | Total Fat             | < 6.5 g per RACC (40 g)                                                                                                                                                                                                                                                                                                                                                                        |
|                                          | Saturated Fat         | ≤ 1.0 g per RACC and ≤ 15% calories from saturated fat                                                                                                                                                                                                                                                                                                                                         |
|                                          | Trans Fat             | < 0.5 g per RACC and per label serving and no PHOs allowed                                                                                                                                                                                                                                                                                                                                     |
|                                          | Cholesterol           | ≤ 20 mg per RACC                                                                                                                                                                                                                                                                                                                                                                               |
|                                          | Sodium                | ≤ 140mg per serving                                                                                                                                                                                                                                                                                                                                                                            |
|                                          | Beneficial Nutrients  | 10% DV of 1 of 6 nutrients                                                                                                                                                                                                                                                                                                                                                                     |
| <i>For Old Label</i>                     | Dietary fiber         | 10% or more DV per RACC                                                                                                                                                                                                                                                                                                                                                                        |
|                                          | Total Sugars          | 7 g or less per serving if good source of dietary fiber (10-19% DV per RACC)                                                                                                                                                                                                                                                                                                                   |
|                                          | Total Sugars          | 9 g or less per serving if excellent source of dietary fiber (20% or more DV per RACC)                                                                                                                                                                                                                                                                                                         |
| <i>For New Label</i>                     | Dietary Fiber         | 10% or more DV per RACC                                                                                                                                                                                                                                                                                                                                                                        |
|                                          | Added Sugars          | ≤ 8g added sugars per serving vs. RACC (1 tsp. sugar = 4g)                                                                                                                                                                                                                                                                                                                                     |
|                                          | Natural Sugars        | Sugars from pieces of fruit do not count toward the sugars allowance                                                                                                                                                                                                                                                                                                                           |
|                                          | Health Claim Language | "Diets low in saturated fat and cholesterol, and as low as possible in trans fat, may reduce the risk of heart disease"<br>Must contain at least one serving of whole fruit or vegetable (not including any added juice or puree concentrate; juice concentrate and puree concentrate will be counted as added sugars) OR dairy/dairy alternative (e.g. nut/grain/soy-based milks)             |
| <b>Smoothies</b>                         | Food Ingredients      | Must contain at least one serving of whole fruit or vegetable (not including any added juice or puree concentrate; juice concentrate and puree concentrate will be counted as added sugars) OR dairy/dairy alternative (e.g. nut/grain/soy-based milks)                                                                                                                                        |
|                                          | Calories              | 200 cal. Per RACC (8oz) or 300 cal. Per 9 - 16 oz. (upper limit)                                                                                                                                                                                                                                                                                                                               |
|                                          | Total Fat             | < 6.5 g per RACC                                                                                                                                                                                                                                                                                                                                                                               |
|                                          | Saturated Fat         | ≤ 1.0 g per RACC and ≤ 15% calories from saturated fat                                                                                                                                                                                                                                                                                                                                         |
|                                          | Trans Fat             | < 0.5 g per RACC and per label serving and no PHOs allowed                                                                                                                                                                                                                                                                                                                                     |
|                                          | Cholesterol           | ≤ 20 mg per RACC                                                                                                                                                                                                                                                                                                                                                                               |
|                                          | Sodium                | ≤ 240mg per serving                                                                                                                                                                                                                                                                                                                                                                            |
|                                          | Beneficial Nutrients  | 10% DV of 1 of 6 nutrients                                                                                                                                                                                                                                                                                                                                                                     |
|                                          | Added Sugars          | ≤ 2 tsp. (or 8 grams) added sugar per serving                                                                                                                                                                                                                                                                                                                                                  |
|                                          | Caffeine              | Caffeine and other stimulant additives are not permitted; caffeine occurring naturally in other ingredients (e.g. green tea) is permitted.                                                                                                                                                                                                                                                     |
|                                          | Health Claim Language | "Diets low in saturated fat and cholesterol, and as low as possible in trans fat, may reduce the risk of heart disease"<br>If product requires additional ingredients to be added in preparation (e.g. milk, yogurt, juice, water) the company must provide a nutrient profile for the finished product and at least one preparation method must meet certification criteria per serving/RACC. |
| <b>Fresh (raw) Fruits and Vegetables</b> | Ingredients           | Nearly all fresh fruits and vegetables that don't qualify under Standard Certification should meet these requirements (e.g. fresh coconut would not qualify). Dried fruit is not covered in this category and must qualify under Standard Certification.                                                                                                                                       |
|                                          | Food Types            |                                                                                                                                                                                                                                                                                                                                                                                                |
|                                          | Total Fat             | 13g or less (also per label serving size* and per 50g* (if the standard serving size is 30g or less))                                                                                                                                                                                                                                                                                          |
|                                          | Saturated Fat         | 1.0 g or less and ≤ 15% calories from saturated fat                                                                                                                                                                                                                                                                                                                                            |
|                                          | Trans Fat             | less than 0.5 g (also per label serving*) Products containing partially hydrogenated oils are not eligible for certification.                                                                                                                                                                                                                                                                  |
|                                          | Cholesterol           | 20 mg or less                                                                                                                                                                                                                                                                                                                                                                                  |
|                                          | Sodium                | 140mg or less per label serving*                                                                                                                                                                                                                                                                                                                                                               |

\*Measurement amounts in addition to or instead of RACC

**Supplementary Table 3. Scoring principles for the 53 attributes within 9 domains of the Food Compass.\***

| Attributes (per 100 kcal [418.4 kj])  | Attribute Points | Target for low score | Target for high score | Target Reference†                       |
|---------------------------------------|------------------|----------------------|-----------------------|-----------------------------------------|
| <b>Nutrient Ratios ‡</b>              |                  |                      |                       |                                         |
| Unsaturated:Saturated fat ratio (log) | -10 to 10        | -0.25                | 1.8                   | 5 <sup>th</sup> , 95 <sup>th</sup> pctl |
| Fiber:Carbohydrate ratio (log)        | -10 to 10        | -6.74                | 0                     | 5 <sup>th</sup> , 95 <sup>th</sup> pctl |
| Potassium:Sodium ratio (log)          | -10 to 10        | -1.87                | 2.77                  | 5 <sup>th</sup> , 95 <sup>th</sup> pctl |
| <b>Vitamins (top 5) §</b>             |                  |                      |                       |                                         |
| Vitamin A, RAE                        | 0 to 10          | 0                    | 225 ug                | 25% RDA                                 |
| Thiamin (B1)                          | 0 to 10          | 0                    | 0.3 mg                | 25% RDA                                 |
| Riboflavin (B2)                       | 0 to 10          | 0                    | 0.325 mg              | 25% RDA                                 |
| Niacin (B3)                           | 0 to 10          | 0                    | 4 mg                  | 25% RDA                                 |
| Vitamin B-6                           | 0 to 10          | 0                    | 0.325 mg              | 25% RDA                                 |
| Folate, DFE (B9) (total)              | 0 to 10          | 0                    | 100 ug                | 25% RDA                                 |
| Cobalamin (B12) (total)               | 0 to 10          | 0                    | 0.6 ug                | 25% RDA                                 |
| Vitamin C                             | 0 to 10          | 0                    | 22.5 mg               | 25% RDA                                 |
| Vitamin D (D2 + D3)                   | 0 to 10          | 0                    | 3.75 ug               | 25% RDA                                 |
| Vitamin E (alpha-tocopherol) (total)  | 0 to 10          | 0                    | 3.75 mg               | 25% RDA                                 |
| Vitamin K (phylloquinone)             | 0 to 10          | 0                    | 30 ug                 | 25% AI                                  |
| Choline, total                        | 0 to 10          | 0                    | 137.5 mg              | 25% AI                                  |
| <b>Minerals (top 5) §</b>             |                  |                      |                       |                                         |
| Calcium                               | 0 to 10          | 0                    | 250 mg                | 25% RDA                                 |
| Phosphorus                            | 0 to 10          | 0                    | 175 mg                | 25% RDA                                 |
| Magnesium                             | 0 to 10          | 0                    | 105 mg                | 25% RDA                                 |
| Iron                                  | 0 to 10          | 0                    | 4.5 mg                | 25% RDA                                 |
| Zinc                                  | 0 to 10          | 0                    | 2.75 mg               | 25% RDA                                 |
| Copper                                | 0 to 10          | 0                    | 225 ug                | 25% RDA                                 |
| Selenium                              | 0 to 10          | 0                    | 13.75 ug              | 25% RDA                                 |
| Sodium                                | -10 to 0         | 575                  | 0                     | 25% RDA                                 |
| Potassium                             | 0 to 10          | 0                    | 1175 mg               | 25% RDA                                 |
| Iodine                                | 0 to 10          | 0                    | 37.5 ug               | 25% RDA                                 |
| <b>Food Ingredients (sum)   </b>      |                  |                      |                       |                                         |
| Fruits                                | 0 to 10          | 0                    | 1.66 cups             | 95 <sup>th</sup> pctl                   |
| Vegetables, non-starchy               | 0 to 10          | 0                    | 3.29 cups             | 95 <sup>th</sup> pctl                   |
| Beans and legumes                     | 0 to 10          | 0                    | 0.44 cups             | 95 <sup>th</sup> pctl                   |
| Whole grains                          | 0 to 10          | 0                    | 1.01 oz               | 95 <sup>th</sup> pctl                   |
| Nuts and seeds                        | 0 to 10          | 0                    | 1.22 oz               | 95 <sup>th</sup> pctl                   |
| Seafood                               | 0 to 10          | 0                    | 3.89 oz               | 95 <sup>th</sup> pctl                   |
| Yogurt                                | 0 to 10          | 0                    | 0.55 cups             | 95 <sup>th</sup> pctl                   |
| Plant Oils                            | 0 to 10          | 0                    | 11.31 g               | 95 <sup>th</sup> pctl                   |
| Refined grains                        | -10 to 0         | 1.36 oz              | 0                     | 95 <sup>th</sup> pctl                   |
| Red or processed meat                 | -10 to 0         | 2.25 oz              | 0                     | 95 <sup>th</sup> pctl                   |

| Attributes (per 100 kcal [418.4 kJ])      | Attribute Points | Target for low score | Target for high score | Target Reference†     |
|-------------------------------------------|------------------|----------------------|-----------------------|-----------------------|
| <b>Additives ¶</b>                        |                  |                      |                       |                       |
| Added sugar, % calories                   | -10 to 0         | 100%                 | 0                     |                       |
| Nitrites                                  | -10, 0           | yes                  | no                    |                       |
| Artificial sweeteners, flavors, or colors | -10, 0           | yes                  | no                    |                       |
| Partially hydrogenated oils               | -10, 0           | yes                  | no                    |                       |
| Interesterified or hydrogenated oils      | -10, 0           | yes                  | no                    |                       |
| High fructose corn syrup                  | -10, 0           | yes                  | no                    |                       |
| Monosodium glutamate (MSG)                | -10, 0           | yes                  | no                    |                       |
| <b>Processing €</b>                       |                  |                      |                       |                       |
| NOVA processing level                     | -10, -2, -1, 0   | NOVA=4               | NOVA=1                |                       |
| Fermentation                              | 0, 10            | no                   | yes                   |                       |
| Frying                                    | -10, 0           | yes                  | no                    |                       |
| <b>Specific Lipids (top 3) ¥</b>          |                  |                      |                       |                       |
| Cholesterol                               | -10 to 0         | 75 mg                | 0                     | 25% DGA               |
| MCFA (8:0 + 10:0 + 12:0, g)               | 0 to 10          | 0                    | 0.35 g                | 95 <sup>th</sup> pctl |
| ALA (18:3n-3)                             | 0 to 10          | 0                    | 0.4 g                 | 25% AI                |
| EPA + DHA (20:5n-3 + 22:6n-3)             | 0 to 10          | 0                    | 62.5 mg               | 25% REC               |
| Trans fats                                | -10 to 0         | 30% energy           | 0                     | expert consensus      |
| <b>Fiber &amp; Protein §</b>              |                  |                      |                       |                       |
| Total fiber                               | 0 to 10          | 0                    | 9.5 g                 | 25% AI                |
| Total protein                             | 0 to 10          | 0                    | 14 g                  | 25% RDA               |
| <b>Phytochemicals §</b>                   |                  |                      |                       |                       |
| Total flavonoids                          | 0 to 10          | 0                    | 32.4 mg               | 95 <sup>th</sup> pctl |
| Total carotenoids                         | 0 to 10          | 0                    | 12,121 mcg            | 95 <sup>th</sup> pctl |

\* Each domain score was calculated as the average of the attribute scores in that domain (or the sum for the food ingredient domain), and the 9 domain scores were summed (with half-weights for specific lipids, fiber & protein, and phytochemicals). To minimize the influence outliers, the range of summed scores across all 8,032 food and beverage items (NHANES 2015-16) was first truncated at the 5<sup>th</sup> and 95<sup>th</sup> percentiles (-10.0, 27.7). The final Food Compass Score (FCS) was then scaled across all food and beverage items to range from 1 (least healthful) to 100 (most healthful) using the equation:  $FCS = [100 - (((\text{max score} - \text{original score}) / \text{score range}) * 99)]$ , or  $[100 - (((27.7 - \text{original score}) / [37.7]) * 99)]$ .

† When Dietary Reference Intakes (DRIs) varied by population subgroup, the DRI was selected for adults age 19-50 years (and for men when varying by sex). Across attributes, the 25% threshold for DRIs was identified as most consistently distinguishing foods with higher vs. lower levels of these nutrients, and was generally similar to the 95% percentile value of content across all foods and beverages reported in NHANES 2015-16. For attributes without DRIs, scoring was based on the distributions of 8,032 unique food and beverage items reported in NHANES 2015-16. Whether scoring should remain constant for other datasets and nations, or vary according to the local food items, is a topic for further investigation.

‡ Nutrient ratios were each scored on a log-linear scale from -10 to 10. To prevent excessive scoring influence of small amounts of these nutrients in any food item, the unsaturated:saturated fat ratio was not calculated for items with <10% energy from fat; the fiber:carbohydrate ratio, for items with <10% energy from carbohydrate; and potassium:sodium ratio, for items with <0.01 mg of either potassium or sodium per 100 kcal. Absolute levels of fiber were also separately included under Fiber & Protein; and of potassium and sodium, under Minerals; in order to capture their separate health effects independent of these interactions represented by the ratios.

§ Vitamins, minerals, fiber, protein, flavonoids, and carotenoids were each scored on a linear scale from 0 to 10.

|| Food-based ingredients were each scored on a linear scale from 0 to 10 for healthful ingredients; and from -10 to 0 for harmful ingredients (refined grains, red or processed meat). Separate 95<sup>th</sup> percentile values were calculated and used for dried fruits (0.70 cups) and dried vegetables (1.55 cups) given their different water weights. The attribute scores in this domain were summed (not averaged), because contents of each ingredient are mutually interdependent.

¶ Because added sugar content is nonlinear (skewed) across the food supply, it was scored as follows: 0 (<2% calories), -1 (2-3% calories), -2 (4-5% calories), -3 (6-7% calories), -4 (8-9% calories), -5 (10-19% calories), -6 (20-39% calories), -7 (40-59% calories), -8 (60-79% calories), -9 (80-99%), and -10 (100%). As no threshold has been set for nitrate content, nitrites were scored as -10 if present, using cured meats as a proxy (25% or more of energy content from cured or processed meats). For calculating the domain score, added sugar and nitrites, considered to have stronger evidence for health harms, were each provided a full weight, while the remaining additives, considered to have emerging and less robust evidence for independent health harms based on more limited studies, were each provided a half weight.

€ The NOVA processing classification was scored as -10, -5, -2.5, and 0 for the 4 categories of ultraprocessed, processed, culinary ingredients, and unprocessed foods. Fermentation was defined based on at least 50% energy content from fermented products, e.g. yogurt, cheese, kefir, kombucha, etc. Frying was defined based on the name and/or cooking description of each food item (e.g., “fried catfish”). For calculating the domain score, the NOVA classification system, considered to have stronger evidence for health harms, was provided a full weight, while fermentation and frying, considered to have emerging and less robust evidence for independent health harms based on more limited studies, were each provided a half weight.

¥ Specific lipids were each scored on a linear scale from 0 to 10 (ALA, EPA+DHA, MCFA) or -10 to 0 (cholesterol, trans fats). For calculating the domain score, MCFA content was considered to have emerging and less robust evidence for independent health harms based on more limited studies, and was provided a half weight.

AI, adequate intake. ALA, alpha-linolenic acid. EPA + DHA, eicosapentaenoic acid + docosahexaenoic acid. MCFAs, medium-chain fatty acids. RDA, recommended daily allowance. REC, dietary recommendation. UL, upper limit intake

**Supplementary Table 4. Food Compass attribute values, attribute scores, domain scores, and overall scores for three example foods.**

| Domains, Attribute*                   | Attribute Original Values |                          |                                                          | Food Compass Scores |                          |                                                          |
|---------------------------------------|---------------------------|--------------------------|----------------------------------------------------------|---------------------|--------------------------|----------------------------------------------------------|
|                                       | Apple, raw                | Rice with beans and beef | Hamburger, 1 medium patty, with condiments, on white bun | Apple, raw          | Rice with beans and beef | Hamburger, 1 medium patty, with condiments, on white bun |
| Food Compass Score (scaled)           |                           |                          |                                                          | 92                  | 57                       | 25                                                       |
| Total score, unscaled                 |                           |                          |                                                          | 24.5                | 11.5                     | -0.8                                                     |
| Nutrient Ratios                       |                           |                          |                                                          | 7.4                 | 1.95                     | -2.16                                                    |
| Unsaturated: Saturated fat ratio(log) | NA                        | 1.04                     | 0.53                                                     | NA                  | 2.62                     | -2.43                                                    |
| Fiber: Carbohydrate ratio (log)       | -1.75                     | -1.73                    | -3.04                                                    | 4.81                | 4.87                     | 0.97                                                     |
| Potassium: Sodium ratio (log)         | 4.67                      | 0.06                     | -0.71                                                    | 10                  | -1.64                    | -5.03                                                    |
| Vitamins (top 5)                      |                           |                          |                                                          | 2.08                | 3.12                     | 4.21                                                     |
| Vitamin A, ug, RAE                    | 5.77                      | 0.58                     | 3.64                                                     | 0.26                | 0.03                     | 0.16                                                     |
| Thiamin, mg                           | 0.03                      | 0.09                     | 0.09                                                     | 1.09                | 2.95                     | 2.89                                                     |
| Riboflavin, mg                        | 0.05                      | 0.03                     | 0.08                                                     | 1.54                | 1.01                     | 2.46                                                     |
| Niacin, mg                            | 0.17                      | 0.88                     | 1.56                                                     | 0.44                | 2.2                      | 3.9                                                      |
| Vitamin B6, mg                        | 0.08                      | 0.08                     | 0.09                                                     | 2.43                | 2.38                     | 2.62                                                     |
| Folate, ug, DFE                       | 5.77                      | 39.31                    | 21.36                                                    | 0.58                | 3.93                     | 2.14                                                     |
| Vitamin B12, ug                       | 0                         | 0.25                     | 0.55                                                     | 0                   | 4.14                     | 9.17                                                     |
| Vitamin C, mg                         | 8.85                      | 0.29                     | 1                                                        | 3.93                | 0.13                     | 0.44                                                     |
| Vitamin D, ug                         | 0                         | 0                        | 0                                                        | 0                   | 0                        | 0                                                        |
| Vitamin E, mg                         | 0.35                      | 0.48                     | 0.15                                                     | 0.92                | 1.28                     | 0.4                                                      |
| Vitamin K, ug                         | 4.23                      | 4.16                     | 4.09                                                     | 1.41                | 1.39                     | 1.36                                                     |
| Choline, mg                           | 6.54                      | 15.43                    | 18.27                                                    | 0.48                | 1.12                     | 1.33                                                     |
| Minerals (top 5)                      |                           |                          |                                                          | 1.34                | 3.13                     | 2.43                                                     |
| Calcium, mg                           | 11.54                     | 18.5                     | 27.73                                                    | 0.46                | 0.74                     | 1.11                                                     |
| Phosphorus, mg                        | 21.15                     | 61.85                    | 52.73                                                    | 1.21                | 3.53                     | 3.01                                                     |
| Magnesium, mg                         | 9.62                      | 15.61                    | 8.18                                                     | 0.92                | 1.49                     | 0.78                                                     |
| Iron, mg                              | 0.23                      | 1.16                     | 0.96                                                     | 0.51                | 2.58                     | 2.14                                                     |
| Zinc, mg                              | 0.08                      | 0.85                     | 1.29                                                     | 0.28                | 3.09                     | 4.69                                                     |
| Copper, mg                            | 0.05                      | 0.08                     | 0.04                                                     | 2.31                | 3.78                     | 1.58                                                     |
| Selenium, ug                          | 0                         | 3.7                      | 7.86                                                     | 0                   | 2.69                     | 5.72                                                     |
| Sodium, mg                            | 1.92                      | 131.79                   | 195.45                                                   | -0.03               | -2.29                    | -3.4                                                     |
| Potassium, mg                         | 205.77                    | 140.46                   | 95.91                                                    | 1.75                | 1.2                      | 0.82                                                     |
| Food Ingredients (sum)                |                           |                          |                                                          | 10                  | 1.9                      | -4.62                                                    |
| Fruits, nondried                      | 1.75                      | 0                        | 0                                                        | 10                  | 0                        | 0                                                        |
| Fruits, dried                         | 0                         | 0                        | 0                                                        | 0                   | 0                        | 0                                                        |
| Veg, nonstarchy, nondried             | 0                         | 0.02                     | 0.07                                                     | 0                   | 0.07                     | 0.22                                                     |
| Veg, nonstarchy, dried                | 0                         | 0                        | 0                                                        | 0                   | 0                        | 0                                                        |
| Beans and legumes                     | 0                         | 0.13                     | 0                                                        | 0                   | 2.89                     | 0                                                        |
| Whole grains                          | 0                         | 0                        | 0                                                        | 0                   | 0                        | 0                                                        |
| Nuts and seeds                        | 0                         | 0                        | 0                                                        | 0                   | 0                        | 0                                                        |
| Seafood                               | 0                         | 0                        | 0                                                        | 0                   | 0                        | 0                                                        |
| Yogurt                                | 0                         | 0                        | 0                                                        | 0                   | 0                        | 0                                                        |
| Plant Oils                            | 0                         | 2.21                     | 1.17                                                     | 0                   | 1.95                     | 1.03                                                     |
| Refined grains                        | 0                         | 0.23                     | 0.44                                                     | 0                   | -1.7                     | -3.21                                                    |
| Red or processed meat                 | 0                         | 0.29                     | 0.6                                                      | 0                   | -1.31                    | -2.67                                                    |
| Additives                             |                           |                          |                                                          | 0                   | 0                        | -1                                                       |
| Added sugar, kcal                     | 0                         | 0                        | 0.05                                                     | 0                   | 0                        | -2                                                       |
| Nitrites                              | 0                         | 0                        | 0                                                        | 0                   | 0                        | 0                                                        |
| Processing                            |                           |                          |                                                          | 0                   | -0.5                     | -1                                                       |
| NOVA processing                       | 1                         | 2                        | 3                                                        | 0                   | -1                       | -2                                                       |
| Fermented †                           | 0                         | 0                        | 0                                                        | 0                   | 0                        | 0                                                        |
| Frying †                              | 0                         | 0                        | 0                                                        | 0                   | 0                        | 0                                                        |
| Specific Lipids (top 3)               |                           |                          |                                                          | 0.17                | 0.93                     | 0.07                                                     |
| Cholesterol, mg                       | 0                         | 8.09                     | 16.82                                                    | 0                   | -1.08                    | -2.24                                                    |
| MCFAs (8:0 + 10:0 + 12:0), g          | 0                         | 0                        | 0                                                        | 0                   | 0.03                     | 0.1                                                      |
| ALA (18:3n-3), g                      | 0.02                      | 0.14                     | 0.1                                                      | 0.43                | 3.38                     | 2.38                                                     |
| EPA + DHA (20:5n-3 + 22:6n-3), g      | 0                         | 0                        | 0                                                        | 0                   | 0                        | 0                                                        |
| Fiber and Protein                     |                           |                          |                                                          | 2.61                | 2.77                     | 2.43                                                     |
| Fiber, total, g                       | 4.62                      | 2.02                     | 0.36                                                     | 4.86                | 2.13                     | 0.38                                                     |
| Protein, g                            | 0.5                       | 4.77                     | 6.27                                                     | 0.36                | 3.41                     | 4.48                                                     |
| Phytochemicals                        |                           |                          |                                                          | 4.54                | 0.1                      | 0.17                                                     |
| Total flavonoids, mg                  | 29.14                     | 0.65                     | 0                                                        | 8.98                | 0.2                      | 0                                                        |
| Total, carotenoids, ug                | 128.85                    | 9.25                     | 414.09                                                   | 0.11                | 0.01                     | 0.34                                                     |

\* Each domain score was calculated as average of the attribute scores in that domain (or the sum for the food ingredient domain), and the 9 domain scores summed (with half-weights for specific lipids, fiber & protein, and phytochemicals). To minimize the influence outliers, the range of summed scores across all 8,032 food and beverage items (NHANES 2015-16) was first truncated at the 5<sup>th</sup> and 95<sup>th</sup> percentiles (-10.0, 27.7), and the final Food Compass Score (FCS) then scaled across all food and beverage items to range from 1 (least healthful) to 100 (most healthful) using the equation:  $FCS = [100 - (((\text{max score} - \text{original score}) / \text{score range}) * 99)]$ , or  $[100 - (((27.7 - \text{original score}) / (37.7)) * 99)]$ . Due to absence of data in FNDDS, 7 Food Compass attributes could not be scored in the NHANES dataset: iodine; trans fat, and 5 artificial additives (artificial sweeteners, flavors, or colors, partially-hydrogenated oils, interesterified or fully hydrogenated oils, high fructose corn syrup, MSG).

Supplementary Table 5. Food Compass Scores for 8,032 unique foods and beverages consumed by U.S. adults, overall and within 12 major food groups

|                                           | No. of Items | Mean | Std Dev | Min  | p5   | p25  | Median | p75  | p95   | Max   |
|-------------------------------------------|--------------|------|---------|------|------|------|--------|------|-------|-------|
| <b>Overall</b>                            | 8032         | 46.1 | 28.7    | 1.0  | 1.0  | 23.4 | 43.6   | 67.8 | 100.0 | 100.0 |
| <b>Beverages</b>                          | 275          | 37.2 | 30.1    | 1.0  | 1.0  | 10.5 | 32.8   | 65.2 | 88.8  | 100.0 |
| <b>Grains</b>                             | 727          | 34.2 | 23.7    | 1.0  | 1.0  | 14.4 | 29.7   | 55.3 | 73.6  | 97.5  |
| <b>Fruits</b>                             | 264          | 71.5 | 21.4    | 22.8 | 38.0 | 54.8 | 73.6   | 91.0 | 100.0 | 100.0 |
| <b>Vegetables</b>                         | 1565         | 73.3 | 22.2    | 1.0  | 34.9 | 56.4 | 75.0   | 95.0 | 100.0 | 100.0 |
| <b>Legumes, Nuts, Seeds</b>               | 264          | 81.6 | 16.0    | 20.2 | 47.7 | 74.4 | 85.5   | 93.0 | 100.0 | 100.0 |
| <b>Meat, Poultry, Eggs</b>                | 763          | 34.1 | 15.6    | 1.0  | 3.0  | 24.9 | 33.1   | 45.9 | 58.4  | 75.2  |
| <b>Fish and Seafood</b>                   | 434          | 67.1 | 17.3    | 20.2 | 36.5 | 54.0 | 69.0   | 80.5 | 92.5  | 100.0 |
| <b>Dairy</b>                              | 245          | 41.0 | 19.2    | 2.0  | 15.0 | 27.3 | 37.7   | 53.2 | 76.9  | 91.1  |
| <b>Fats &amp; Oils</b>                    | 129          | 27.4 | 24.8    | 1.0  | 1.0  | 8.2  | 23.2   | 36.7 | 83.6  | 85.7  |
| <b>Mixed Dishes</b>                       | 2206         | 39.4 | 21.1    | 1.0  | 8.3  | 24.1 | 37.2   | 52.0 | 78.8  | 100.0 |
| <b>Sauce Condiment</b>                    | 160          | 48.9 | 30.6    | 1.0  | 2.2  | 24.1 | 46.0   | 73.1 | 100.0 | 100.0 |
| <b>Savory Snacks &amp; Sweet Desserts</b> | 1000         | 17.1 | 17.2    | 1.0  | 1.0  | 2.2  | 12.1   | 24.6 | 54.4  | 93.1  |

**Supplementary Table 6. Examples of Food Compass Score categories of foods consumed by US adults.** Individual unique foods and beverages are shown, with their Food Compass Score (FCS) in parentheses. Based on the observed ranges,  $FCS \geq 70$  was selected a reasonable cutpoint for foods or beverages to be encouraged;  $FCS = 31-69$ , to be consumed in moderation; and  $FCS \leq 30$ , to be minimized.

|                  | FCS ≤ 30                                                                                                                                                                                                                                                                                                                                                                                                                                                                                                                                                   | FCS 30 to 69                                                                                                                                                                                                                                                                                                                                                                                                                                                                                                                                                                               | FCS ≥ 70                                                                                                                                                                                                                                                                                                                                                                                                                        |
|------------------|------------------------------------------------------------------------------------------------------------------------------------------------------------------------------------------------------------------------------------------------------------------------------------------------------------------------------------------------------------------------------------------------------------------------------------------------------------------------------------------------------------------------------------------------------------|--------------------------------------------------------------------------------------------------------------------------------------------------------------------------------------------------------------------------------------------------------------------------------------------------------------------------------------------------------------------------------------------------------------------------------------------------------------------------------------------------------------------------------------------------------------------------------------------|---------------------------------------------------------------------------------------------------------------------------------------------------------------------------------------------------------------------------------------------------------------------------------------------------------------------------------------------------------------------------------------------------------------------------------|
| <b>Beverages</b> | Mango nectar (28)<br>Horchata beverage, made with milk (27)<br>Coffee, iced café mocha, nonfat (25)<br>Frozen coffee drink, nonfat, with whipped cream (19)<br>Coffee, pre-sweetened low-calorie (14)<br>Sunny D fruit juice drink (13)<br>Cranberry juice drink, high vitamin C (11)<br>Lemonade, frozen concentrate (10)<br>Tea, iced, bottled, black, pre-sweetened (3)<br>Capri sun fruit juice drink (3)<br>Red Bull energy drink (1)<br>Monster energy drink (1)<br>Powerade sports drink (1)<br>Gatorade G sports drink (1)<br>Soft drink, cola (1) | Coffee, latte, with non-dairy milk, flavored (68)<br>Apple juice, 100% (65)<br>Grape juice, 100% (65)<br>Cranberry juice blend, 100% juice (62)<br>Boost Plus nutritional drink or shake (61)<br>Coffee, cappuccino (55)<br>Iced tea/lemonade juice drink, light (53)<br>Coconut water, sweetened (42)<br>Ensure Plus nutritional drink or shake (39)<br>Coffee, latte, flavored (37)<br>Fruit juice drink, with high vitamin C, light (36)                                                                                                                                                | Tomato juice, 100%, low sodium (100)<br>Celery juice (100)<br>Fruit and vegetable smoothie (98)<br>Grapefruit juice, 100% (90)<br>Carrot juice, 100% (89)<br>Orange juice, 100%, with calcium (87)<br>Fruit smoothie, with whole fruit, no dairy, added protein (78)<br>Coffee, cappuccino, with non-dairy milk (70)                                                                                                            |
| <b>Grains</b>    | Naan, Indian flatbread (28)<br>Noodles, cooked (28)<br>Roll, whole grain white (27)<br>Post Honeycomb (26)<br>Muffin, English, oat bran (26)<br>Pancakes, plain (22)<br>Kellogg's Corn Pops (22)<br>Pasta, cooked (21)<br>Quaker Cap'n Crunch (21)<br>Bread, pumpkin (19)<br>Bagel, multigrain, with raisins (17)<br>Kellogg's Corn Flakes (17)<br>Waffle, plain (16)<br>Grits, regular or quick, made with water (14)<br>Garlic bread, melted cheese, from frozen (13)<br>Kellogg's Frosted Flakes (13)<br>Rice, white, made with margarine (8)           | Bulgur, fat not added (68)<br>Injera, Ethiopian bread (67)<br>Pancakes, buckwheat (67)<br>Oatmeal, instant, plain, made with milk (65)<br>Millet, fat not added (64)<br>PowerBar (64)<br>Bread, whole wheat (61)<br>Oatmeal, instant, maple flavored (59)<br>Tortilla, whole wheat (57)<br>General Mills Lucky Charms (56)<br>Post Grape Nuts (53)<br>Kellogg's Nutri-Grain Cereal Bar (49)<br>Muffin, whole wheat (48)<br>General Mills Fiber One Chewy Bar (45)<br>Hominy, cooked, fat not added (33)<br>French toast, whole grain, from frozen (32)<br>Bread, rye, reduced calorie (32) | General Mills Cheerios (91)<br>Quinoa, fat not added (91)<br>Oatmeal, instant, plain, made with water, fat not added (89)<br>General Mills Total (80)<br>Pasta, whole grain, cooked (80)<br>Kashi 7 Whole Grain Puffs (80)<br>Post Shredded Wheat (79)<br>Kellogg's All-Bran Complete Wheat Flakes (74)<br>Rice, brown and wild, cooked, fat added in cooking (71)<br>Kellogg's Raisin Bran (70)<br>General Mills Wheaties (70) |



|                     | FCS ≤ 30                                                                                                                                                                                                                                                                                                                                                                                                                                                                                                                                                                     | FCS 30 to 69                                                                                                                                                                                                                                                                                                                                                                                                                                                                                                                              | FCS ≥ 70                                                                                                                                                                                                                                                                                                                                                                                                                                                                                                                                          |
|---------------------|------------------------------------------------------------------------------------------------------------------------------------------------------------------------------------------------------------------------------------------------------------------------------------------------------------------------------------------------------------------------------------------------------------------------------------------------------------------------------------------------------------------------------------------------------------------------------|-------------------------------------------------------------------------------------------------------------------------------------------------------------------------------------------------------------------------------------------------------------------------------------------------------------------------------------------------------------------------------------------------------------------------------------------------------------------------------------------------------------------------------------------|---------------------------------------------------------------------------------------------------------------------------------------------------------------------------------------------------------------------------------------------------------------------------------------------------------------------------------------------------------------------------------------------------------------------------------------------------------------------------------------------------------------------------------------------------|
|                     | Roll, white, hot dog bun (4)<br>Kellogg's Rice Krispies Treats cereal (3)<br>Bread, pita (1)<br>Tortilla, flour (1)                                                                                                                                                                                                                                                                                                                                                                                                                                                          |                                                                                                                                                                                                                                                                                                                                                                                                                                                                                                                                           |                                                                                                                                                                                                                                                                                                                                                                                                                                                                                                                                                   |
| <b>Fruits</b>       | Fruit dessert with cream and/or pudding (26)<br>Apple, candied (26)<br>Cherries, maraschino (24)                                                                                                                                                                                                                                                                                                                                                                                                                                                                             | Raspberries, frozen, with sugar (64)<br>Blueberries, frozen, sweetened (62)<br>Peach, canned, light or medium syrup (54)<br>Applesauce, stewed apples, with sugar (51)<br>Cherries, dried (49)<br>Pineapple, canned, heavy syrup (48)<br>Banana, chocolate-covered with nuts (42)<br>Fruit cocktail, canned, light syrup (42)                                                                                                                                                                                                             | Blackberries; Cranberries; Grapefruit;<br>Raspberries; Lemon; Lime; Apricot;<br>Cantaloupe; Papaya; Peach; Strawberries,<br>Orange; Tangelo; Nectarine – all raw (100<br>each)<br>Peach, canned, unsweetened in water (98)<br>Blueberries, raw (95)<br>Apple, raw (92)<br>Peach, dried, unsweetened (90)<br>Fig, dried, uncooked (83)<br>Prune, dried, uncooked (81)<br>Banana, raw (79)<br>Banana, ripe, fried (73)<br>Applesauce, stewed apples, unsweetened<br>(72)<br>Date, raw (72)<br>Fruit cocktail, canned, unsweetened, in water<br>(71) |
| <b>Mixed Dishes</b> | Nachos with meat, cheese, sour cream (29)<br>Mushrooms, batter-dipped, fried (27)<br>Vegetable submarine sandwich, with fat free<br>spread (25)<br>Cheese sandwich, American cheese, on white<br>bread, with butter (25)<br>Roast beef submarine sandwich, on roll, au<br>jus (21)<br>Egg, cheese, and sausage on biscuit (14)<br>Ravioli, meat-filled, with tomato sauce or<br>meat sauce, canned (14)<br>Beef enchilada, chili gravy, rice, refried beans,<br>frozen meal (13)<br>Pizza with meat other than pepperoni, from<br>restaurant or fast food, medium crust (12) | Hamburger, 1 miniature patty, on miniature<br>bun, from school (66)<br>Kung Pao chicken (66)<br>Pork and vegetables, Hawaiian style (64)<br>Minestrone soup, reduced sodium, canned or<br>ready-to-serve (62)<br>Peanut butter sandwich, reduced fat peanut<br>butter, on whole wheat bread (60)<br>Spanakopita (53)<br>Turkey or chicken burger, with condiments,<br>on whole wheat bun (48)<br>Enchilada with chicken and beans, red-chile<br>or enchilada sauce (46)<br>Pizza, with pepperoni, from school lunch,<br>medium crust (45) | Seafood garden salad with lettuce, tomato<br>and/or carrots, other vegetables, no dressing<br>(100)<br>Ceviche (100)<br>Vegetable curry (100)<br>Spinach, cooked, from fresh, with cheese<br>sauce (94)<br>Mussels with tomato-based sauce (94)<br>Asian chicken or turkey garden salad with<br>crispy noodles, lettuce, fruit, nuts, no<br>dressing (93)<br>Pasta, whole grain, with tomato-based sauce,<br>seafood, and vegetables, home recipe (93)<br>Moo Goo Gai Pan (92)<br>Lentil soup, home recipe (88)                                   |

|                                           | FCS ≤ 30                                                                                                                                                                                                                                                                                                                                                                                                                                                                                                                                                                                                                                                                                                                                      | FCS 30 to 69                                                                                                                                                                                                                                                                                                                                                                                                                                                                                                                                                                       | FCS ≥ 70                                                                                                                                                                                                                                                                                                                                               |
|-------------------------------------------|-----------------------------------------------------------------------------------------------------------------------------------------------------------------------------------------------------------------------------------------------------------------------------------------------------------------------------------------------------------------------------------------------------------------------------------------------------------------------------------------------------------------------------------------------------------------------------------------------------------------------------------------------------------------------------------------------------------------------------------------------|------------------------------------------------------------------------------------------------------------------------------------------------------------------------------------------------------------------------------------------------------------------------------------------------------------------------------------------------------------------------------------------------------------------------------------------------------------------------------------------------------------------------------------------------------------------------------------|--------------------------------------------------------------------------------------------------------------------------------------------------------------------------------------------------------------------------------------------------------------------------------------------------------------------------------------------------------|
|                                           | Soft taco with chicken, from fast food (11)<br>Beef barbecue sandwich or Sloppy Joe, on bun (10)<br>Cheeseburger, 1 small patty, with condiments, on bun, from fast food (McDonald's Cheeseburger) (7)<br>Rice, white, with soy-based sauce (2)<br>Frankfurter or hot dog sandwich, beef and pork, plain, on white bun (1)<br>Jelly sandwich, regular jelly, on white bread (1)<br>Instant soup, noodle with egg, shrimp or chicken (1)                                                                                                                                                                                                                                                                                                       | Sausage, potatoes, and carrots, broccoli, and dark-green leafy vegetables; gravy (44)<br>Grilled cheese sandwich, Cheddar cheese, on whole wheat bread (40)<br>Turkey with gravy, dressing, potatoes, vegetable, frozen meal (37)<br>Pizza with extra meat, thick crust (33)<br>Peanut butter and jelly sandwich, regular peanut butter, regular jelly, white bread (32)<br>Ravioli, cheese-filled, with tomato sauce, diet frozen meal (31)                                                                                                                                       | Rice, brown, with beans and tomatoes (85)<br>Crab cake (85)<br>Fish soup with potatoes, Mexican style (81)<br>Chicken fillet, broiled, sandwich, on whole wheat roll, with lettuce, tomato and spread (75)<br>Rice, brown, with peas and carrots, fat added in cooking (75)<br>Tuna salad, made with light mayonnaise (71)<br>Oysters Rockefeller (70) |
| <b>Savory Snacks &amp; Sweet Desserts</b> | Graham crackers, reduced fat (29)<br>Reese's Peanut Butter Cup (28)<br>Popcorn, movie theater, unbuttered (24)<br>Crackers, multigrain (22)<br>Doritos tortilla chips, nacho cheese flavor (21)<br>Cobbler, pear (19)<br>Yogurt, frozen, flavors other than chocolate, lowfat milk (19)<br>Chex Mix snack mix, plain (19)<br>Pie, apple, tart (18)<br>Snicker's bar (17)<br>Ice cream bar, chocolate ice cream, chocolate covered (15)<br>Jelly, all flavors (14)<br>Pie, custard (13)<br>Tiramisu (12)<br>Butterfinger bar (10)<br>Goldfish crackers, cheese (9)<br>M&M's Milk Chocolate Candies (9)<br>Ice cream sundae, chocolate or fudge topping, with whipped cream (8)<br>Churros (7)<br>Crackers, saltine (6)<br>Fudge, chocolate (4) | Sweet potato chips (68)<br>Popcorn, microwave, plain, light (56)<br>Sun Chips multigrain chips (56)<br>Potato chips, lightly salted (56)<br>Halvah, plain (54)<br>Fritos corn chips, plain (49)<br>Almonds, yogurt-covered (47)<br>Crackers, wheat, reduced sodium (45)<br>Potato chips, baked, plain (42)<br>Yogurt, frozen, chocolate, whole milk (41)<br>M&M's Almond Chocolate Candies (40)<br>Jelly, sugar free, all flavors (38)<br>Ice cream cone with nuts, chocolate ice cream (35)<br>Sorbet, fruit, noncitrus flavor (32)<br>Triscuit crackers, woven wheat, plain (31) | Popcorn, air popped, unbuttered (80)<br>Yogurt, frozen, chocolate, nonfat milk (77)<br>Almonds, chocolate covered (74)                                                                                                                                                                                                                                 |

---

| FCS ≤ 30                                                                                                                                                                                                                                                                                                                                  | FCS 30 to 69 | FCS ≥ 70 |
|-------------------------------------------------------------------------------------------------------------------------------------------------------------------------------------------------------------------------------------------------------------------------------------------------------------------------------------------|--------------|----------|
| Cookie, macaroon (2)<br>Pretzels, hard, plain, unsalted (1)<br>Breakfast pastry (1)<br>Boston cream pie (1)<br>Milky Way bar (1)<br>3 Musketeer's bar (1)<br>Pudding, ready-to-eat, flavors other than<br>chocolate, fat free (1)<br>Cake, angel food, without icing or filling (1)<br>Skittles candy (1)<br>Taffy (1)<br>Marshmallow (1) |              |          |

---

**Supplementary Table 7. Food Compass Score, Health Star Rating, Nutri-Score, and NOVA classification for each of 8,032 unique foods and beverages consumed by U.S. adults.**

(see pages 23-107)

**Supplementary Table 8. Original (uncorrected) scores for all food items.**

(see pages at the end of this Supplement)

**Supplementary Figure 1. Food Compass domain score densities for 8,032 unique foods and beverages consumed by U.S. adults.** Generally, the domain score distributions were similar, with clustering of scores within each domain consistent with what one would expect in the US food supply.

### Domain Score Densities for NHANES data

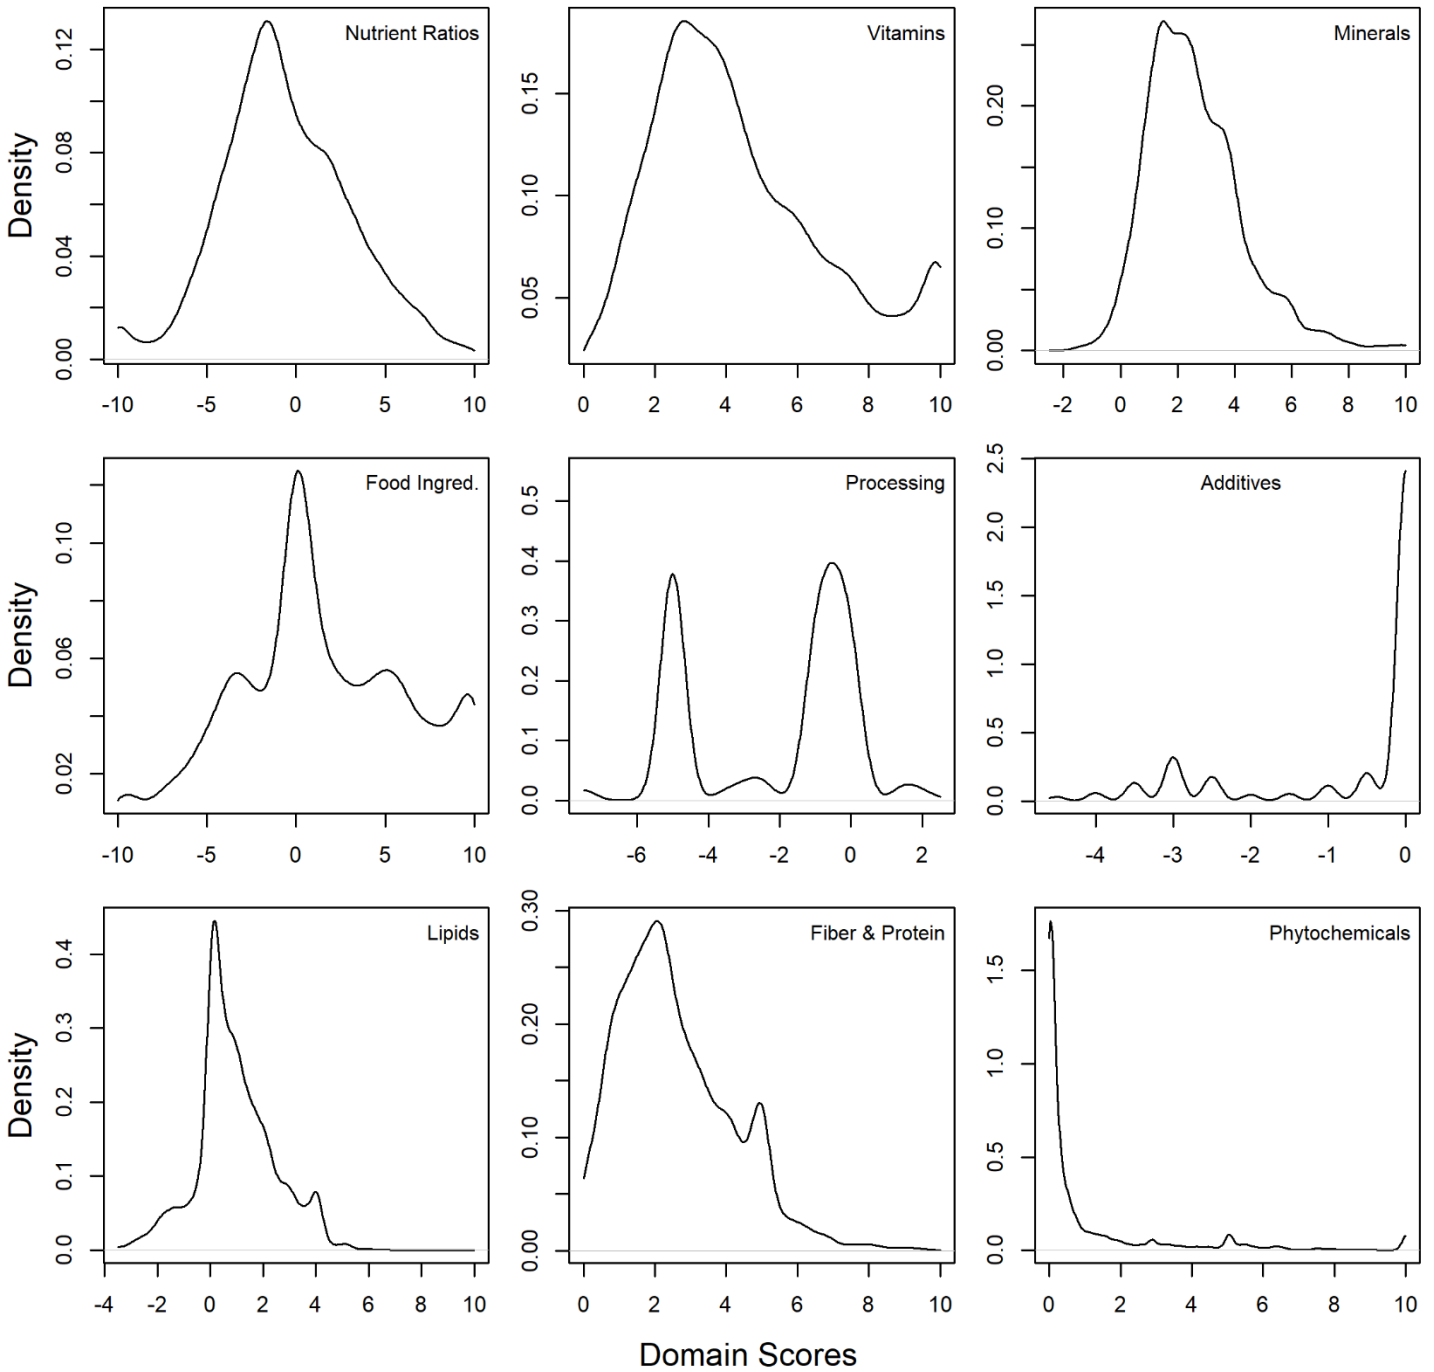

**Supplementary Figure 2. Examples of Food Compass Score categories of foods consumed by US adults.** Selected individual unique beverages (top panel) and grains (bottom panel) are shown, ranked by their Food Compass Score (FCS). Based on the observed ranges,  $FCS \geq 70$  was selected a reasonable cutpoint for foods or beverages to be encouraged;  $FCS=31-69$ , to be consumed in moderation; and  $FCS \leq 30$ , to be minimized.

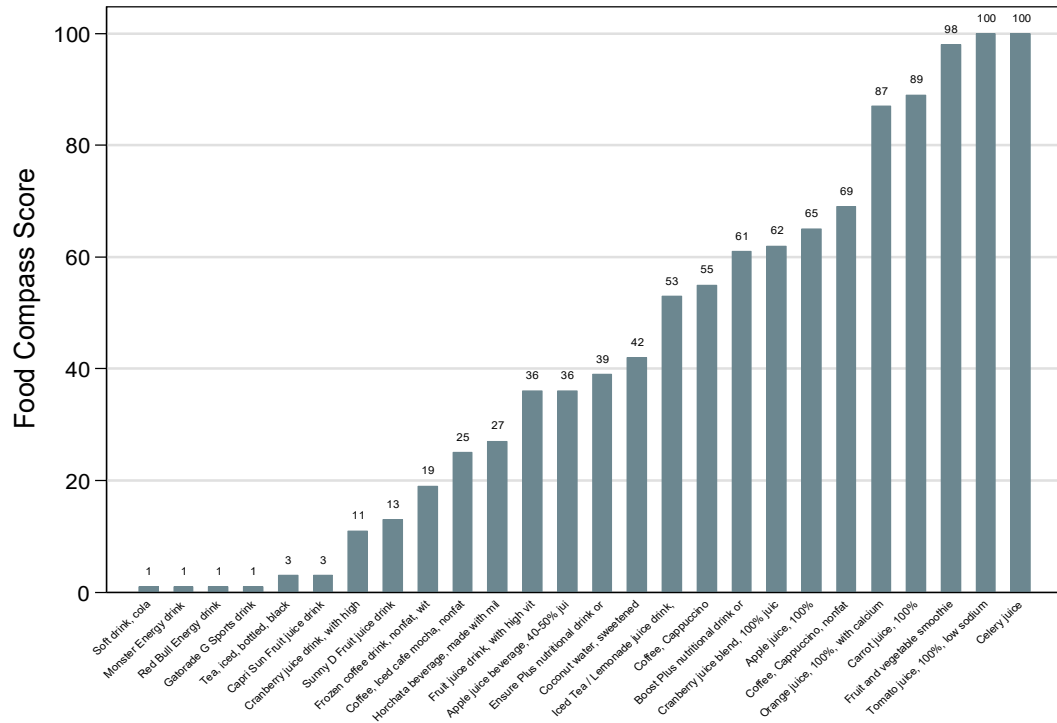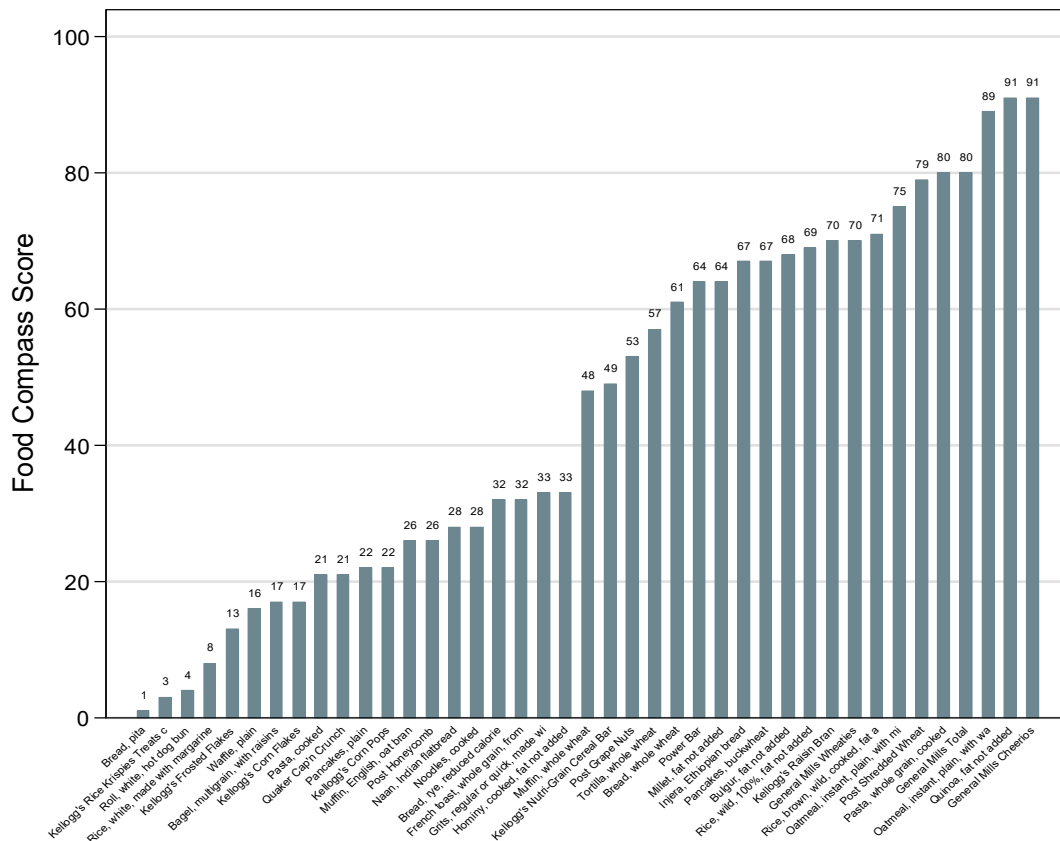

**Supplementary Figure 3. Food Compass Scores (FCS) according to NOVA processing classification for 8,032 unique foods and beverages consumed by U.S. adults.** Panels show boxplot distributions for all foods (top left), grains (top right), vegetables (bottom left), and legumes, nuts, and seeds (bottom right). Horizontal lines represent the median FCS score; shaded bars, the interquartile range (25<sup>th</sup>, 75<sup>th</sup> percentiles); error bars, the 5<sup>th</sup> and 95<sup>th</sup> percentiles; and small circles, additional outliers. NOVA has 4 scoring categories, with NOVA category 1 considered healthiest and category 4 considered least healthy.

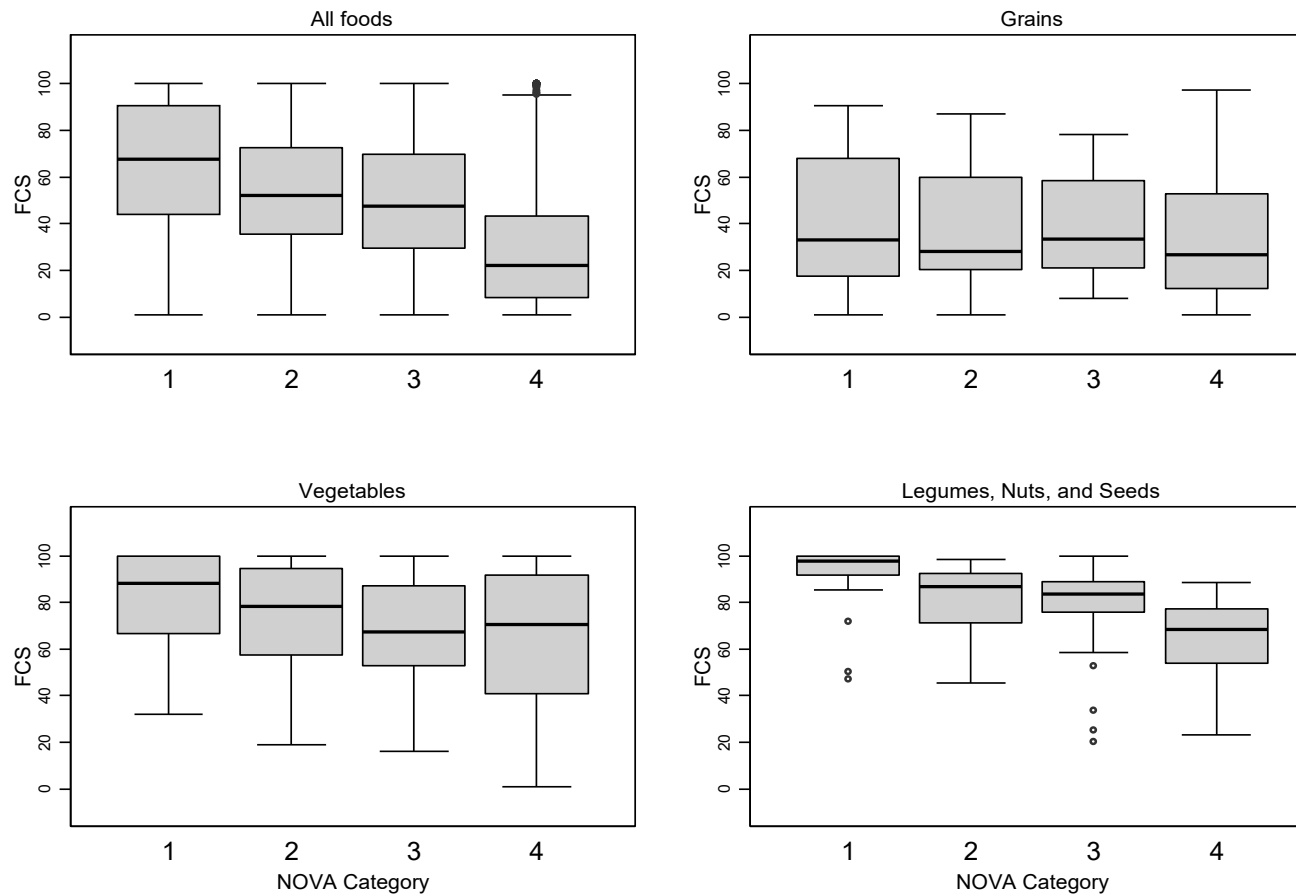

**Supplementary Table 7. Food Compass Score, Health Star Rating, Nutri-Score, and NOVA classification for each of 8,032 unique foods and beverages consumed by U.S. adults.**

| foodcode | level1nd        | Description                                                              | Food Compass Score | Health Star Rating | Nutri-Score | NOVA Category |
|----------|-----------------|--------------------------------------------------------------------------|--------------------|--------------------|-------------|---------------|
| 74301150 | 10000_Beverages | Tomato juice, 100%, low sodium                                           | 100                | 4                  | B           | 1             |
| 74303100 | 10000_Beverages | Tomato and vegetable juice, 100%, low sodium                             | 100                | 4                  | B           | 1             |
| 75132000 | 10000_Beverages | Mixed vegetable juice                                                    | 100                | 4                  | C           | 1             |
| 75132100 | 10000_Beverages | Celery juice                                                             | 100                | 4                  | B           | 1             |
| 64104600 | 10000_Beverages | Blackberry juice, 100%                                                   | 100                | 3                  | C           | 1             |
| 78101100 | 10000_Beverages | Fruit and vegetable smoothie                                             | 98                 | 1.5                | D           | 1             |
| 64132500 | 10000_Beverages | Strawberry juice, 100%                                                   | 97                 | 3                  | C           | 1             |
| 61210820 | 10000_Beverages | Orange juice, 100%, with calcium added, frozen, reconstituted            | 94                 | 3                  | C           | 1             |
| 64133100 | 10000_Beverages | Watermelon juice, 100%                                                   | 94                 | 4                  | C           | 1             |
| 78101110 | 10000_Beverages | Fruit and vegetable smoothie, added protein                              | 93                 | 1.5                | D           | 2             |
| 74301100 | 10000_Beverages | Tomato juice, 100%                                                       | 93                 | 4                  | B           | 3             |
| 61201020 | 10000_Beverages | Grapefruit juice, 100%, NS as to form                                    | 90                 | 4                  | B           | 1             |
| 61201220 | 10000_Beverages | Grapefruit juice, 100%, canned, bottled or in a carton                   | 90                 | 4                  | B           | 1             |
| 73105010 | 10000_Beverages | Carrot juice, 100%                                                       | 89                 | 4                  | C           | 1             |
| 95110020 | 10000_Beverages | Nutritional drink or shake, high protein, ready-to-drink (Slim Fast)     | 89                 | 1                  | C           | 4             |
| 95120010 | 10000_Beverages | Nutritional drink or shake, high protein, ready-to-drink, NFS            | 89                 | 1                  | C           | 4             |
| 61210250 | 10000_Beverages | Orange juice, 100%, with calcium added, canned, bottled or in a carton   | 87                 | 3                  | D           | 1             |
| 64134015 | 10000_Beverages | Fruit smoothie, with whole fruit, no dairy                               | 87                 | 2.5                | C           | 1             |
| 61210620 | 10000_Beverages | Orange juice, 100%, frozen, reconstituted                                | 85                 | 3                  | C           | 1             |
| 92201010 | 10000_Beverages | Coffee substitute                                                        | 85                 | 3.5                | B           | 1             |
| 74302000 | 10000_Beverages | Tomato juice cocktail                                                    | 85                 | 4                  | C           | 3             |
| 74303000 | 10000_Beverages | Tomato and vegetable juice, 100%                                         | 85                 | 4                  | C           | 3             |
| 61213900 | 10000_Beverages | Fruit juice blend, citrus, 100% juice, with calcium added                | 85                 | 3                  | D           | 1             |
| 61210720 | 10000_Beverages | Orange juice, 100%, frozen, not reconstituted                            | 85                 | 1                  | E           | 1             |
| 95106010 | 10000_Beverages | Nutritional drink or shake, ready-to-drink, light (Muscle Milk)          | 84                 | 2                  | C           | 4             |
| 64134030 | 10000_Beverages | Fruit smoothie juice drink, no dairy                                     | 83                 | 3                  | C           | 2             |
| 61210010 | 10000_Beverages | Orange juice, 100%, freshly squeezed                                     | 82                 | 3                  | D           | 1             |
| 61210000 | 10000_Beverages | Orange juice, 100%, NFS                                                  | 82                 | 3                  | D           | 1             |
| 64134100 | 10000_Beverages | Fruit smoothie, light                                                    | 81                 | 1                  | D           | 1             |
| 95110010 | 10000_Beverages | Nutritional drink or shake, ready-to-drink, sugar free (Slim Fast)       | 81                 | 0.5                | C           | 4             |
| 61210220 | 10000_Beverages | Orange juice, 100%, canned, bottled or in a carton                       | 79                 | 3                  | D           | 1             |
| 64134020 | 10000_Beverages | Fruit smoothie, with whole fruit, no dairy, added protein                | 78                 | 2                  | D           | 4             |
| 95105000 | 10000_Beverages | Nutritional drink or shake, ready-to-drink (Kellogg's Special K Protein) | 78                 | 0.5                | D           | 4             |
| 61201010 | 10000_Beverages | Grapefruit juice, 100%, freshly squeezed                                 | 78                 | 3                  | C           | 1             |
| 61213220 | 10000_Beverages | Tangerine juice, 100%                                                    | 78                 | 3                  | D           | 1             |
| 64121000 | 10000_Beverages | Passion fruit juice, 100%                                                | 78                 | 2                  | D           | 1             |
| 95106000 | 10000_Beverages | Nutritional drink or shake, ready-to-drink (Muscle Milk)                 | 77                 | 1.5                | C           | 4             |
| 61201225 | 10000_Beverages | Grapefruit juice, 100%, with calcium added                               | 77                 | 3                  | C           | 1             |
| 61201620 | 10000_Beverages | Grapefruit juice, 100%, frozen, reconstituted                            | 76                 | 3                  | D           | 1             |
| 95110000 | 10000_Beverages | Nutritional drink or shake, ready-to-drink (Slim Fast)                   | 76                 | 0.5                | C           | 4             |
| 64105400 | 10000_Beverages | Cranberry juice, 100%, not a blend                                       | 75                 | 2.5                | D           | 1             |
| 64132010 | 10000_Beverages | Prune juice, 100%                                                        | 71                 | 1                  | E           | 1             |
| 92432000 | 10000_Beverages | Fruit juice drink, citrus, carbonated                                    | 71                 | 4                  | C           | 4             |
| 92102502 | 10000_Beverages | Coffee, Iced Latte, with non-dairy milk                                  | 71                 | 2                  | C           | 4             |
| 61213800 | 10000_Beverages | Fruit juice blend, citrus, 100% juice                                    | 70                 | 2.5                | D           | 1             |
| 78101120 | 10000_Beverages | Fruit and vegetable smoothie, bottled                                    | 70                 | 2                  | D           | 4             |
| 92161002 | 10000_Beverages | Coffee, Cappuccino, with non-dairy milk                                  | 70                 | 2                  | C           | 4             |
| 92162002 | 10000_Beverages | Coffee, Cappuccino, decaffeinated, with non-dairy milk                   | 70                 | 2                  | C           | 4             |
| 92102512 | 10000_Beverages | Coffee, Iced Latte, decaffeinated, with non-dairy milk                   | 69                 | 2                  | C           | 4             |
| 92102511 | 10000_Beverages | Coffee, Iced Latte, decaffeinated, nonfat                                | 69                 | 2.5                | C           | 1             |
| 64124020 | 10000_Beverages | Pineapple juice, 100%                                                    | 69                 | 2.5                | D           | 1             |
| 92102501 | 10000_Beverages | Coffee, Iced Latte, nonfat                                               | 69                 | 2.5                | C           | 1             |
| 64104030 | 10000_Beverages | Apple juice, 100%, with calcium added                                    | 69                 | 2.5                | D           | 1             |
| 95104000 | 10000_Beverages | Nutritional drink or shake, ready-to-drink, sugar free (Glucerna)        | 69                 | 0.5                | D           | 4             |
| 92161001 | 10000_Beverages | Coffee, Cappuccino, nonfat                                               | 69                 | 2.5                | C           | 1             |
| 92162001 | 10000_Beverages | Coffee, Cappuccino, decaffeinated, nonfat                                | 69                 | 2.5                | C           | 1             |
| 92101913 | 10000_Beverages | Coffee, Latte, decaffeinated, with non-dairy milk                        | 68                 | 1.5                | C           | 4             |
| 92550350 | 10000_Beverages | Orange juice beverage, 40-50% juice, light                               | 68                 | 4                  | B           | 4             |
| 64100220 | 10000_Beverages | Cranberry juice blend, 100% juice, with calcium added                    | 68                 | 2.5                | D           | 1             |
| 92101906 | 10000_Beverages | Coffee, Latte, with non-dairy milk, flavored                             | 68                 | 0.5                | D           | 2             |
| 92101901 | 10000_Beverages | Coffee, Latte, nonfat                                                    | 67                 | 1.5                | C           | 1             |
| 92101911 | 10000_Beverages | Coffee, Latte, decaffeinated, nonfat                                     | 67                 | 1.5                | C           | 1             |
| 92101903 | 10000_Beverages | Coffee, Latte, with non-dairy milk                                       | 67                 | 1.5                | C           | 4             |
| 11553120 | 10000_Beverages | Fruit smoothie, with whole fruit and dairy, added protein                | 67                 | 0.5                | E           | 3             |
| 64134200 | 10000_Beverages | Fruit smoothie, bottled                                                  | 66                 | 2.5                | D           | 4             |
| 64116060 | 10000_Beverages | Grape juice, 100%, with calcium added                                    | 66                 | 1.5                | E           | 1             |
| 64104010 | 10000_Beverages | Apple juice, 100%                                                        | 65                 | 2.5                | D           | 1             |
| 64100100 | 10000_Beverages | Fruit juice, NFS                                                         | 65                 | 2.5                | D           | 1             |
| 11553100 | 10000_Beverages | Fruit smoothie, NFS                                                      | 65                 | 0.5                | D           | 2             |
| 64116020 | 10000_Beverages | Grape juice, 100%                                                        | 65                 | 1.5                | E           | 1             |
| 11553110 | 10000_Beverages | Fruit smoothie, with whole fruit and dairy                               | 63                 | 0.5                | D           | 2             |
| 95101000 | 10000_Beverages | Nutritional drink or shake, ready-to-drink (Boost)                       | 63                 | 0.5                | E           | 4             |
| 64100110 | 10000_Beverages | Fruit juice blend, 100% juice                                            | 63                 | 2.5                | D           | 1             |
| 64100200 | 10000_Beverages | Cranberry juice blend, 100% juice                                        | 62                 | 2.5                | D           | 1             |
| 64126000 | 10000_Beverages | Pomegranate juice, 100%                                                  | 61                 | 2                  | D           | 1             |
| 95101010 | 10000_Beverages | Nutritional drink or shake, ready-to-drink (Boost Plus)                  | 61                 | 0.5                | E           | 4             |
| 95120020 | 10000_Beverages | Nutritional drink or shake, high protein, light, ready-to-drink, NFS     | 61                 | 0.5                | E           | 4             |
| 95120050 | 10000_Beverages | Nutritional drink or shake, liquid, soy-based                            | 61                 | 0.5                | E           | 4             |
| 64101010 | 10000_Beverages | Apple cider                                                              | 61                 | 2.5                | D           | 1             |
| 92101810 | 10000_Beverages | Coffee, macchiato                                                        | 58                 | 2                  | C           | 1             |
| 92801000 | 10000_Beverages | Wine, nonalcoholic                                                       | 56                 | 3                  | B           | 4             |
| 92802000 | 10000_Beverages | Wine, light, nonalcoholic                                                | 56                 | 3                  | B           | 4             |
| 92101919 | 10000_Beverages | Coffee, Latte, decaffeinated, with non-dairy milk, flavored              | 56                 | 0.5                | D           | 4             |
| 92102500 | 10000_Beverages | Coffee, Iced Latte                                                       | 55                 | 2                  | C           | 1             |
| 92161000 | 10000_Beverages | Coffee, Cappuccino                                                       | 55                 | 2                  | C           | 1             |
| 64120010 | 10000_Beverages | Papaya juice, 100%                                                       | 54                 | 1.5                | D           | 1             |
| 92162000 | 10000_Beverages | Coffee, Cappuccino, decaffeinated                                        | 54                 | 2                  | C           | 1             |
| 95342000 | 10000_Beverages | Fruit juice, acai blend                                                  | 54                 | 0.5                | E           | 4             |
| 92307510 | 10000_Beverages | Iced Tea / Lemonade juice drink, light                                   | 53                 | 4                  | B           | 4             |
| 92102515 | 10000_Beverages | Coffee, Iced Latte, decaffeinated, with non-dairy milk, flavored         | 53                 | 1.5                | D           | 4             |
| 92101900 | 10000_Beverages | Coffee, Latte                                                            | 52                 | 1.5                | D           | 1             |
| 92101910 | 10000_Beverages | Coffee, Latte, decaffeinated                                             | 52                 | 1.5                | D           | 1             |
| 92101610 | 10000_Beverages | Coffee, espresso                                                         | 52                 | 3                  | C           | 1             |
| 92102505 | 10000_Beverages | Coffee, Iced Latte, with non-dairy milk, flavored                        | 51                 | 1.5                | D           | 4             |
| 92101630 | 10000_Beverages | Coffee, espresso, decaffeinated                                          | 51                 | 3                  | C           | 1             |
| 92202010 | 10000_Beverages | Chicory beverage                                                         | 50                 | 3.5                | B           | 1             |
| 11553130 | 10000_Beverages | Fruit smoothie juice drink, with dairy                                   | 49                 | 0.5                | E           | 4             |
| 92101905 | 10000_Beverages | Coffee, Latte, nonfat, flavored                                          | 49                 | 1                  | D           | 2             |
| 92101918 | 10000_Beverages | Coffee, Latte, decaffeinated, nonfat, flavored                           | 49                 | 1                  | D           | 2             |
| 92101960 | 10000_Beverages | Coffee, Cafe Mocha, with non-dairy milk                                  | 49                 | 0.5                | E           | 4             |
| 95103000 | 10000_Beverages | Nutritional drink or shake, ready-to-drink (Ensure)                      | 48                 | 0.5                | E           | 4             |
| 95120000 | 10000_Beverages | Nutritional drink or shake, ready-to-drink, NFS                          | 48                 | 0.5                | E           | 4             |
| 92433000 | 10000_Beverages | Fruit juice drink, noncitrus, carbonated                                 | 48                 | 3.5                | C           | 4             |
| 11551050 | 10000_Beverages | Licudo or Batido                                                         | 48                 | 0.5                | E           | 2             |



| foodcode | level1nd        | Description                                                                                                      | Food Compass Score | Health Star Rating | Nutri-Score | NOVA Category |
|----------|-----------------|------------------------------------------------------------------------------------------------------------------|--------------------|--------------------|-------------|---------------|
| 92101975 | 10000_Beverages | Coffee, Cafe Mocha, decaffeinated, with non-dairy milk                                                           | 48                 | 0.5                | E           | 4             |
| 92550200 | 10000_Beverages | Grape juice drink, light                                                                                         | 46                 | 4                  | C           | 4             |
| 92511250 | 10000_Beverages | Fruit juice beverage, 40-50% juice, citrus                                                                       | 45                 | 3                  | D           | 4             |
| 92510720 | 10000_Beverages | Fruit punch, made with fruit juice and soda                                                                      | 44                 | 2.5                | D           | 2             |
| 78101000 | 10000_Beverages | Vegetable and fruit juice, 100% juice, with high vitamin C                                                       | 44                 | 2.5                | D           | 1             |
| 92101850 | 10000_Beverages | Coffee, cafe con leche                                                                                           | 43                 | 1                  | D           | 2             |
| 92101851 | 10000_Beverages | Coffee, cafe con leche, decaffeinated                                                                            | 43                 | 1                  | D           | 2             |
| 92102602 | 10000_Beverages | Coffee, Iced Cafe Mocha, with non-dairy milk                                                                     | 42                 | 0.5                | D           | 4             |
| 92102612 | 10000_Beverages | Coffee, Iced Cafe Mocha, decaffeinated, with non-dairy milk                                                      | 42                 | 0.5                | D           | 4             |
| 92102510 | 10000_Beverages | Coffee, Iced Latte, decaffeinated                                                                                | 42                 | 2                  | C           | 4             |
| 42404010 | 10000_Beverages | Coconut water, sweetened                                                                                         | 42                 | 1                  | D           | 3             |
| 92550380 | 10000_Beverages | Pomegranate juice beverage, 40-50% juice, light                                                                  | 42                 | 2                  | E           | 4             |
| 92510650 | 10000_Beverages | Tamarind drink                                                                                                   | 41                 | 1                  | E           | 2             |
| 95103010 | 10000_Beverages | Nutritional drink or shake, ready-to-drink (Ensure Plus)                                                         | 39                 | 0.5                | E           | 4             |
| 92307500 | 10000_Beverages | Iced Tea / Lemonade juice drink                                                                                  | 38                 | 4                  | D           | 4             |
| 92306800 | 10000_Beverages | Tea, hot, chai, with milk                                                                                        | 37                 | 0.5                | D           | 1             |
| 92101904 | 10000_Beverages | Coffee, Latte, flavored                                                                                          | 37                 | 0.5                | D           | 2             |
| 95102000 | 10000_Beverages | Nutritional drink or shake, ready-to-drink (Carnation Instant Breakfast)                                         | 37                 | 0.5                | E           | 4             |
| 92550030 | 10000_Beverages | Fruit juice drink, with high vitamin C, light                                                                    | 36                 | 4                  | C           | 4             |
| 92101917 | 10000_Beverages | Coffee, Latte, decaffeinated, flavored                                                                           | 36                 | 0.5                | D           | 2             |
| 92550110 | 10000_Beverages | Cranberry juice drink, with high vitamin C, light                                                                | 36                 | 4                  | C           | 4             |
| 64201010 | 10000_Beverages | Apricot nectar                                                                                                   | 36                 | 1.5                | E           | 4             |
| 92550360 | 10000_Beverages | Apple juice beverage, 40-50% juice, light                                                                        | 36                 | 4                  | C           | 4             |
| 92101820 | 10000_Beverages | Coffee, macchiato, sweetened                                                                                     | 36                 | 1                  | D           | 2             |
| 92102503 | 10000_Beverages | Coffee, Iced Latte, flavored                                                                                     | 35                 | 1                  | D           | 2             |
| 92101800 | 10000_Beverages | Coffee, Cuban                                                                                                    | 34                 | 1                  | D           | 2             |
| 64203020 | 10000_Beverages | Guava nectar                                                                                                     | 34                 | 2.5                | D           | 4             |
| 92102514 | 10000_Beverages | Coffee, Iced Latte, decaffeinated, nonfat, flavored                                                              | 34                 | 1.5                | C           | 4             |
| 92102504 | 10000_Beverages | Coffee, Iced Latte, nonfat, flavored                                                                             | 34                 | 1.5                | C           | 4             |
| 64201500 | 10000_Beverages | Banana nectar                                                                                                    | 34                 | 1                  | E           | 4             |
| 92510730 | 10000_Beverages | Fruit punch, made with soda, fruit juice, and sherbet or ice cream                                               | 34                 | 1                  | E           | 3             |
| 92102020 | 10000_Beverages | Frozen mocha coffee drink, with non-dairy milk                                                                   | 33                 | 0.5                | E           | 3             |
| 92512090 | 10000_Beverages | Pina Colada, nonalcoholic                                                                                        | 33                 | 1                  | E           | 2             |
| 92101923 | 10000_Beverages | Frozen coffee drink, with non-dairy milk                                                                         | 33                 | 0.5                | E           | 2             |
| 42403010 | 10000_Beverages | Coconut water, unsweetened                                                                                       | 33                 | 2                  | C           | 1             |
| 92171000 | 10000_Beverages | Coffee, bottled/canned                                                                                           | 32                 | 0.5                | E           | 4             |
| 92101955 | 10000_Beverages | Coffee, Cafe Mocha, nonfat                                                                                       | 30                 | 0.5                | D           | 4             |
| 92101970 | 10000_Beverages | Coffee, Cafe Mocha, decaffeinated, nonfat                                                                        | 30                 | 0.5                | D           | 4             |
| 64202010 | 10000_Beverages | Cantaloupe nectar                                                                                                | 30                 | 1.5                | E           | 4             |
| 64205010 | 10000_Beverages | Peach nectar                                                                                                     | 29                 | 2                  | E           | 4             |
| 92101950 | 10000_Beverages | Coffee, Cafe Mocha                                                                                               | 29                 | 0.5                | E           | 3             |
| 92101965 | 10000_Beverages | Coffee, Cafe Mocha, decaffeinated                                                                                | 29                 | 0.5                | E           | 3             |
| 92121030 | 10000_Beverages | Coffee, mocha, instant, pre-lightened and pre-sweetened with low calorie sweetener, reconstituted                | 28                 | 2.5                | C           | 4             |
| 92121050 | 10000_Beverages | Coffee, mocha, instant, decaffeinated, pre-lightened and pre-sweetened with low calorie sweetener, reconstituted | 28                 | 3                  | C           | 4             |
| 64204010 | 10000_Beverages | Mango nectar                                                                                                     | 28                 | 2                  | E           | 4             |
| 92101921 | 10000_Beverages | Frozen coffee drink, nonfat                                                                                      | 28                 | 0.5                | E           | 2             |
| 92101931 | 10000_Beverages | Frozen coffee drink, decaffeinated, nonfat                                                                       | 27                 | 0.5                | E           | 2             |
| 64200100 | 10000_Beverages | Fruit nectar, NFS                                                                                                | 27                 | 2                  | E           | 4             |
| 92610030 | 10000_Beverages | Horchata beverage, made with milk                                                                                | 27                 | 0.5                | E           | 1             |
| 92610020 | 10000_Beverages | Horchata beverage, made with water                                                                               | 26                 | 0.5                | E           | 1             |
| 92102600 | 10000_Beverages | Coffee, Iced Cafe Mocha                                                                                          | 26                 | 0.5                | D           | 3             |
| 92611100 | 10000_Beverages | Oatmeal beverage with milk                                                                                       | 25                 | 0.5                | E           | 1             |
| 92102601 | 10000_Beverages | Coffee, Iced Cafe Mocha, nonfat                                                                                  | 25                 | 0.5                | D           | 4             |
| 92102611 | 10000_Beverages | Coffee, Iced Cafe Mocha, decaffeinated, nonfat                                                                   | 25                 | 0.5                | D           | 4             |
| 92102010 | 10000_Beverages | Frozen mocha coffee drink, nonfat                                                                                | 25                 | 0.5                | E           | 3             |
| 92101933 | 10000_Beverages | Frozen coffee drink, decaffeinated, with non-dairy milk                                                          | 25                 | 0.5                | E           | 4             |
| 64213010 | 10000_Beverages | Passion fruit nectar                                                                                             | 25                 | 1                  | E           | 4             |
| 95312560 | 10000_Beverages | Energy drink (Ocean Spray Cran-Energy Juice Drink)                                                               | 25                 | 4                  | C           | 4             |
| 64210010 | 10000_Beverages | Papaya nectar                                                                                                    | 24                 | 1.5                | E           | 4             |
| 92101600 | 10000_Beverages | Coffee, Turkish                                                                                                  | 24                 | 1.5                | C           | 2             |
| 92102050 | 10000_Beverages | Frozen mocha coffee drink, with non-dairy milk and whipped cream                                                 | 23                 | 0.5                | E           | 3             |
| 92102513 | 10000_Beverages | Coffee, Iced Latte, decaffeinated, flavored                                                                      | 23                 | 1                  | D           | 4             |
| 92102080 | 10000_Beverages | Frozen mocha coffee drink, decaffeinated, with non-dairy milk                                                    | 22                 | 0.5                | E           | 4             |
| 92530610 | 10000_Beverages | Fruit juice drink, with high vitamin C                                                                           | 22                 | 2.5                | D           | 4             |
| 92611010 | 10000_Beverages | Oatmeal beverage with water                                                                                      | 21                 | 0.5                | D           | 2             |
| 92308500 | 10000_Beverages | Tea, iced, brewed, green, pre-sweetened with sugar                                                               | 21                 | 1                  | D           | 3             |
| 92308530 | 10000_Beverages | Tea, iced, brewed, green, decaffeinated, pre-sweetened with sugar                                                | 20                 | 1                  | D           | 3             |
| 92308000 | 10000_Beverages | Tea, iced, brewed, black, pre-sweetened with sugar                                                               | 20                 | 1                  | D           | 3             |
| 92308030 | 10000_Beverages | Tea, iced, brewed, black, decaffeinated, pre-sweetened with sugar                                                | 20                 | 1                  | D           | 3             |
| 92613510 | 10000_Beverages | Cornmeal beverage with chocolate milk                                                                            | 20                 | 0.5                | E           | 2             |
| 64215010 | 10000_Beverages | Pear nectar                                                                                                      | 20                 | 1.5                | E           | 4             |
| 92101926 | 10000_Beverages | Frozen coffee drink, nonfat, with whipped cream                                                                  | 19                 | 0.5                | E           | 3             |
| 92102040 | 10000_Beverages | Frozen mocha coffee drink, nonfat, with whipped cream                                                            | 19                 | 0.5                | E           | 3             |
| 92101936 | 10000_Beverages | Frozen coffee drink, decaffeinated, nonfat, with whipped cream                                                   | 19                 | 0.5                | E           | 3             |
| 92582110 | 10000_Beverages | Fruit juice drink, added calcium (Sunny D)                                                                       | 18                 | 2.5                | D           | 4             |
| 92101930 | 10000_Beverages | Frozen coffee drink, decaffeinated                                                                               | 18                 | 0.5                | E           | 2             |
| 92101920 | 10000_Beverages | Frozen coffee drink                                                                                              | 18                 | 0.5                | E           | 2             |
| 92613010 | 10000_Beverages | Cornmeal beverage                                                                                                | 18                 | 0.5                | E           | 1             |
| 92102000 | 10000_Beverages | Frozen mocha coffee drink                                                                                        | 17                 | 0.5                | E           | 3             |
| 92101925 | 10000_Beverages | Frozen coffee drink, with whipped cream                                                                          | 17                 | 0.5                | E           | 3             |
| 92101935 | 10000_Beverages | Frozen coffee drink, decaffeinated, with whipped cream                                                           | 17                 | 0.5                | E           | 3             |
| 92542000 | 10000_Beverages | Fruit flavored drink, with high vitamin C, powdered, reconstituted                                               | 17                 | 0.5                | D           | 4             |
| 92102090 | 10000_Beverages | Frozen mocha coffee drink, decaffeinated, with whipped cream                                                     | 17                 | 0.5                | E           | 3             |
| 92102030 | 10000_Beverages | Frozen mocha coffee drink, with whipped cream                                                                    | 17                 | 0.5                | E           | 3             |
| 92130011 | 10000_Beverages | Coffee, decaffeinated, pre-lightened                                                                             | 17                 | 3                  | C           | 4             |
| 92171010 | 10000_Beverages | Coffee, bottled/canned, light                                                                                    | 16                 | 1.5                | D           | 4             |
| 92309010 | 10000_Beverages | Tea, iced, bottled, black, decaffeinated                                                                         | 15                 | 0.5                | D           | 1             |
| 92130010 | 10000_Beverages | Coffee, pre-lightened                                                                                            | 15                 | 3                  | C           | 4             |
| 64221010 | 10000_Beverages | Soursop, nectar                                                                                                  | 15                 | 1.5                | E           | 4             |
| 92121041 | 10000_Beverages | Coffee, instant, decaffeinated, pre-lightened and pre-sweetened with low calorie sweetener, reconstituted        | 15                 | 2.5                | C           | 4             |
| 92102610 | 10000_Beverages | Coffee, Iced Cafe Mocha, decaffeinated                                                                           | 15                 | 0.5                | D           | 4             |
| 92130006 | 10000_Beverages | Coffee, decaffeinated, pre-lightened and pre-sweetened with low calorie sweetener                                | 15                 | 2.5                | C           | 4             |
| 92102070 | 10000_Beverages | Frozen mocha coffee drink, decaffeinated, nonfat                                                                 | 15                 | 0.5                | E           | 4             |
| 92121040 | 10000_Beverages | Coffee, instant, pre-lightened and pre-sweetened with low calorie sweetener, reconstituted                       | 14                 | 2.5                | C           | 4             |
| 92130005 | 10000_Beverages | Coffee, pre-lightened and pre-sweetened with low calorie sweetener                                               | 14                 | 2.5                | C           | 4             |
| 92121020 | 10000_Beverages | Coffee, mocha, instant, pre-lightened and pre-sweetened with sugar, reconstituted                                | 14                 | 1                  | D           | 4             |
| 92531030 | 10000_Beverages | Fruit juice drink (Sunny D)                                                                                      | 13                 | 2                  | E           | 4             |
| 92530950 | 10000_Beverages | Vegetable and fruit juice drink, with high vitamin C                                                             | 13                 | 4                  | C           | 4             |
| 92101928 | 10000_Beverages | Frozen coffee drink, with non-dairy milk and whipped cream                                                       | 12                 | 0.5                | E           | 4             |
| 92101938 | 10000_Beverages | Frozen coffee drink, decaffeinated, with non-dairy milk and whipped cream                                        | 12                 | 0.5                | E           | 4             |
| 92102110 | 10000_Beverages | Frozen mocha coffee drink, decaffeinated, with non-dairy milk and whipped cream                                  | 12                 | 0.5                | E           | 4             |
| 92305040 | 10000_Beverages | Tea, iced, instant, black, pre-sweetened with sugar                                                              | 11                 | 1                  | D           | 4             |
| 92530510 | 10000_Beverages | Cranberry juice drink, with high vitamin C                                                                       | 11                 | 2                  | E           | 4             |
| 92511000 | 10000_Beverages | Lemonade, frozen concentrate, not reconstituted                                                                  | 10                 | 1                  | E           | 4             |

| foodcode | level1nd        | Description                                                                               | Food Compass Score | Health Star Rating | Nutri-Score | NOVA Category |
|----------|-----------------|-------------------------------------------------------------------------------------------|--------------------|--------------------|-------------|---------------|
| 92102100 | 10000_Beverages | Frozen mocha coffee drink, decaffeinated, nonfat, with whipped cream                      | 8                  | 0.5                | E           | 4             |
| 94210200 | 10000_Beverages | Water, bottled, flavored (Glaceau Vitamin Water)                                          | 7                  | 1.5                | C           | 4             |
| 92102060 | 10000_Beverages | Frozen mocha coffee drink, decaffeinated                                                  | 7                  | 0.5                | E           | 4             |
| 92550370 | 10000_Beverages | Lemonade, fruit juice drink, light                                                        | 5                  | 4                  | C           | 4             |
| 92130021 | 10000_Beverages | Coffee, decaffeinated, pre-sweetened with sugar                                           | 4                  | 2                  | C           | 4             |
| 92121010 | 10000_Beverages | Coffee, instant, pre-sweetened with sugar, reconstituted                                  | 4                  | 2                  | C           | 4             |
| 92130020 | 10000_Beverages | Coffee, pre-sweetened with sugar                                                          | 4                  | 2                  | C           | 4             |
| 92550035 | 10000_Beverages | Fruit juice drink, light                                                                  | 4                  | 3                  | D           | 4             |
| 92552030 | 10000_Beverages | Fruit juice drink (Capri Sun)                                                             | 3                  | 3                  | D           | 4             |
| 92309000 | 10000_Beverages | Tea, iced, bottled, black                                                                 | 3                  | 0.5                | D           | 4             |
| 95310700 | 10000_Beverages | Energy drink (Rockstar)                                                                   | 2                  | 0.5                | E           | 4             |
| 92410810 | 10000_Beverages | Soft drink, chocolate flavored                                                            | 2                  | 0.5                | D           | 4             |
| 92102450 | 10000_Beverages | Iced Coffee, pre-lightened and pre-sweetened                                              | 2                  | 1.5                | D           | 4             |
| 92305050 | 10000_Beverages | Tea, iced, instant, black, decaffeinated, pre-sweetened with sugar                        | 2                  | 1                  | D           | 4             |
| 92306100 | 10000_Beverages | Corn beverage                                                                             | 2                  | 1.5                | D           | 1             |
| 75200700 | 10000_Beverages | Aloe vera juice drink                                                                     | 1                  | 2                  | C           | 1             |
| 92121000 | 10000_Beverages | Coffee, instant, pre-lightened and pre-sweetened with sugar, reconstituted                | 1                  | 2                  | C           | 4             |
| 92121001 | 10000_Beverages | Coffee, instant, decaffeinated, pre-lightened and pre-sweetened with sugar, reconstituted | 1                  | 2                  | C           | 4             |
| 92130000 | 10000_Beverages | Coffee, pre-lightened and pre-sweetened with sugar                                        | 1                  | 2                  | C           | 4             |
| 92130001 | 10000_Beverages | Coffee, decaffeinated, pre-lightened and pre-sweetened with sugar                         | 1                  | 2                  | C           | 4             |
| 92305910 | 10000_Beverages | Tea, iced, instant, green, pre-sweetened with sugar                                       | 1                  | 1.5                | C           | 4             |
| 92309500 | 10000_Beverages | Tea, iced, bottled, green                                                                 | 1                  | 1.5                | C           | 4             |
| 92400000 | 10000_Beverages | Soft drink, NFS                                                                           | 1                  | 0.5                | D           | 4             |
| 92410310 | 10000_Beverages | Soft drink, cola                                                                          | 1                  | 0.5                | D           | 4             |
| 92410315 | 10000_Beverages | Soft drink, cola, reduced sugar                                                           | 1                  | 2                  | C           | 4             |
| 92410340 | 10000_Beverages | Soft drink, cola, decaffeinated                                                           | 1                  | 0.5                | D           | 4             |
| 92410360 | 10000_Beverages | Soft drink, pepper type                                                                   | 1                  | 0.5                | D           | 4             |
| 92410390 | 10000_Beverages | Soft drink, pepper type, decaffeinated                                                    | 1                  | 0.5                | D           | 4             |
| 92410410 | 10000_Beverages | Soft drink, cream soda                                                                    | 1                  | 0.5                | E           | 4             |
| 92410510 | 10000_Beverages | Soft drink, fruit flavored, caffeine free                                                 | 1                  | 0.5                | D           | 4             |
| 92410550 | 10000_Beverages | Soft drink, fruit flavored, caffeine containing                                           | 1                  | 0.5                | D           | 4             |
| 92410610 | 10000_Beverages | Soft drink, ginger ale                                                                    | 1                  | 1                  | D           | 4             |
| 92410710 | 10000_Beverages | Soft drink, root beer                                                                     | 1                  | 0.5                | D           | 4             |
| 92411510 | 10000_Beverages | Soft drink, cola, fruit or vanilla flavored                                               | 1                  | 0.5                | D           | 4             |
| 92411520 | 10000_Beverages | Soft drink, cola, chocolate flavored                                                      | 1                  | 0.5                | D           | 4             |
| 92510610 | 10000_Beverages | Fruit juice drink                                                                         | 1                  | 2.5                | C           | 4             |
| 92510955 | 10000_Beverages | Lemonade, fruit juice drink                                                               | 1                  | 2.5                | D           | 4             |
| 92510960 | 10000_Beverages | Lemonade, fruit flavored drink                                                            | 1                  | 1.5                | C           | 4             |
| 92511015 | 10000_Beverages | Fruit flavored drink                                                                      | 1                  | 0.5                | E           | 4             |
| 92512040 | 10000_Beverages | Frozen daiquiri mix, frozen concentrate, not reconstituted                                | 1                  | 0.5                | E           | 4             |
| 92512050 | 10000_Beverages | Frozen daiquiri mix, from frozen concentrate, reconstituted                               | 1                  | 0.5                | E           | 4             |
| 92512110 | 10000_Beverages | Margarita mix, nonalcoholic                                                               | 1                  | 0.5                | E           | 4             |
| 92513000 | 10000_Beverages | Fruit flavored smoothie drink, frozen, no dairy                                           | 1                  | 1.5                | C           | 4             |
| 92513010 | 10000_Beverages | Fruit flavored smoothie drink, frozen, light, no dairy                                    | 1                  | 2.5                | C           | 4             |
| 92530410 | 10000_Beverages | Fruit flavored drink, with high vitamin C                                                 | 1                  | 4                  | C           | 4             |
| 92541010 | 10000_Beverages | Fruit flavored drink, powdered, reconstituted                                             | 1                  | 1.5                | C           | 4             |
| 92582100 | 10000_Beverages | Fruit juice drink, with high vitamin C, plus added calcium                                | 1                  | 2                  | D           | 4             |
| 92612010 | 10000_Beverages | Sugar cane beverage                                                                       | 1                  | 0.5                | E           | 4             |
| 92803000 | 10000_Beverages | Nonalcoholic malt beverage                                                                | 1                  | 0.5                | D           | 4             |
| 92804000 | 10000_Beverages | Shirley Temple                                                                            | 1                  | 0.5                | E           | 4             |
| 95310200 | 10000_Beverages | Energy drink (Full Throttle)                                                              | 1                  | 0.5                | D           | 4             |
| 95310400 | 10000_Beverages | Energy drink (Monster)                                                                    | 1                  | 0.5                | D           | 4             |
| 95310500 | 10000_Beverages | Energy drink (Mountain Dew AMP)                                                           | 1                  | 0.5                | D           | 4             |
| 95310550 | 10000_Beverages | Energy drink (No Fear)                                                                    | 1                  | 0.5                | E           | 4             |
| 95310555 | 10000_Beverages | Energy drink (No Fear Motherload)                                                         | 1                  | 0.5                | E           | 4             |
| 95310560 | 10000_Beverages | Energy drink (NOS)                                                                        | 1                  | 0.5                | D           | 4             |
| 95310600 | 10000_Beverages | Energy drink (Red Bull)                                                                   | 1                  | 0.5                | D           | 4             |
| 95310750 | 10000_Beverages | Energy drink (SoBe Energize Energy Juice Drink)                                           | 1                  | 2.5                | D           | 4             |
| 95310800 | 10000_Beverages | Energy drink (Vault)                                                                      | 1                  | 0.5                | D           | 4             |
| 95311000 | 10000_Beverages | Energy Drink                                                                              | 1                  | 0.5                | D           | 4             |
| 95320200 | 10000_Beverages | Sports drink (Gatorade G)                                                                 | 1                  | 1.5                | C           | 4             |
| 95320500 | 10000_Beverages | Sports drink (Powerade)                                                                   | 1                  | 1                  | D           | 4             |
| 95321000 | 10000_Beverages | Sports drink, NFS                                                                         | 1                  | 1.5                | C           | 4             |
| 95322200 | 10000_Beverages | Sports drink, low calorie (Gatorade G2)                                                   | 1                  | 3                  | C           | 4             |
| 95323000 | 10000_Beverages | Sports drink, low calorie                                                                 | 1                  | 3                  | C           | 4             |
| 95330100 | 10000_Beverages | Fluid replacement, electrolyte solution                                                   | 1                  | 2.5                | C           | 4             |
| 95330500 | 10000_Beverages | Fluid replacement, 5% glucose in water                                                    | 1                  | 2                  | C           | 4             |

| foodcode | level1nd    | Description                                                                        | Food Compass Score | Health Star Rating | Nutri-Score | NOVA Category |
|----------|-------------|------------------------------------------------------------------------------------|--------------------|--------------------|-------------|---------------|
| 57408100 | 1000_Grains | Cereal (Uncle Sam)                                                                 | 97                 | 5                  | A           | 4             |
| 57401100 | 1000_Grains | Cereal, toasted oat                                                                | 96                 | 4                  | B           | 4             |
| 57000100 | 1000_Grains | Cereal, oat, NFS                                                                   | 91                 | 4                  | B           | 4             |
| 57123000 | 1000_Grains | Cereal (General Mills Cheerios)                                                    | 91                 | 4                  | B           | 4             |
| 57306700 | 1000_Grains | Cereal (Malt-O-Meal Toasted Oat Cereal)                                            | 91                 | 4                  | B           | 4             |
| 56204005 | 1000_Grains | Quinoa, fat not added in cooking                                                   | 91                 | 4                  | A           | 1             |
| 57305215 | 1000_Grains | Cereal (Malt-O-Meal Frosted Mini Spooners)                                         | 91                 | 4.5                | A           | 4             |
| 56203086 | 1000_Grains | Oatmeal, instant, plain, made with water, fat not added in cooking                 | 89                 | 4                  | A           | 1             |
| 56203106 | 1000_Grains | Oatmeal, instant, plain, made with non-dairy milk, fat not added in cooking        | 87                 | 4                  | A           | 2             |
| 57416000 | 1000_Grains | Cereal, puffed wheat, plain                                                        | 87                 | 5                  | A           | 4             |
| 57206700 | 1000_Grains | Cereal (General Mills Fiber One)                                                   | 83                 | 5                  | A           | 4             |
| 57214000 | 1000_Grains | Cereal (Kellogg's Frosted Mini-Wheats)                                             | 83                 | 4.5                | A           | 4             |
| 56207200 | 1000_Grains | Whole wheat cereal, cooked, fat not added in cooking                               | 81                 | 3.5                | A           | 1             |
| 57406100 | 1000_Grains | Cereal (General Mills Total)                                                       | 80                 | 4                  | C           | 4             |
| 56113000 | 1000_Grains | Noodles, whole grain, cooked                                                       | 80                 | 4                  | A           | 1             |
| 57231250 | 1000_Grains | Cereal (Post Great Grains Double Pecan Whole Grain Cereal)                         | 80                 | 4                  | C           | 4             |
| 57301500 | 1000_Grains | Cereal (Kashi 7 Whole Grain Puffs)                                                 | 80                 | 5                  | A           | 4             |
| 56132990 | 1000_Grains | Pasta, whole grain, cooked                                                         | 80                 | 4                  | A           | 1             |
| 57417000 | 1000_Grains | Cereal (Post Shredded Wheat)                                                       | 79                 | 5                  | A           | 4             |
| 56203076 | 1000_Grains | Oatmeal, regular or quick, made with non-dairy milk, fat not added in cooking      | 79                 | 3.5                | A           | 2             |
| 56203510 | 1000_Grains | Oatmeal, reduced sugar, plain, fat not added in cooking                            | 78                 | 3.5                | A           | 3             |
| 56203555 | 1000_Grains | Oatmeal, reduced sugar, flavored, fat not added in cooking                         | 78                 | 3.5                | A           | 3             |
| 57341000 | 1000_Grains | Cereal (Post Shredded Wheat'n Bran)                                                | 78                 | 5                  | A           | 4             |
| 57106050 | 1000_Grains | Cereal (Post Great Grains Banana Nut Crunch)                                       | 77                 | 4                  | B           | 4             |
| 56203056 | 1000_Grains | Oatmeal, regular or quick, made with water, fat not added in cooking               | 77                 | 4                  | A           | 1             |
| 56200300 | 1000_Grains | Cereal, cooked, NFS                                                                | 77                 | 4                  | A           | 1             |
| 56203000 | 1000_Grains | Oatmeal, NS as to regular, quick, or instant, fat not added in cooking             | 77                 | 4                  | A           | 1             |
| 57125010 | 1000_Grains | Cereal (General Mills 25% Less Sugar Cinnamon Toast Crunch)                        | 76                 | 3                  | C           | 4             |
| 56203096 | 1000_Grains | Oatmeal, instant, plain, made with milk, fat not added in cooking                  | 75                 | 4                  | A           | 1             |
| 56205205 | 1000_Grains | Rice, wild, 100%, cooked, NS as to fat added in cooking                            | 75                 | 3.5                | A           | 2             |
| 56205215 | 1000_Grains | Rice, wild, 100%, cooked, fat added in cooking                                     | 75                 | 3.5                | A           | 2             |
| 57231200 | 1000_Grains | Cereal (Post Great Grains Raisins, Dates, and Pecans)                              | 75                 | 4                  | C           | 4             |
| 57332050 | 1000_Grains | Cereal (General Mills Total Raisin Bran)                                           | 75                 | 3                  | C           | 4             |
| 57316385 | 1000_Grains | Cereal (General Mills Cheerios Protein)                                            | 74                 | 2.5                | C           | 4             |
| 57308190 | 1000_Grains | Cereal, muesli                                                                     | 74                 | 4                  | C           | 4             |
| 57411000 | 1000_Grains | Cereal (General Mills Chex Wheat)                                                  | 74                 | 4                  | C           | 4             |
| 57207000 | 1000_Grains | Cereal, bran flakes                                                                | 74                 | 3.5                | C           | 4             |
| 57208000 | 1000_Grains | Cereal (Kellogg's All-Bran Complete Wheat Flakes)                                  | 74                 | 3.5                | C           | 4             |
| 57206705 | 1000_Grains | Cereal (General Mills Fiber One Caramel Delight)                                   | 73                 | 3.5                | C           | 4             |
| 57241000 | 1000_Grains | Cereal (General Mills Cheerios Honey Nut)                                          | 73                 | 2.5                | D           | 4             |
| 57305500 | 1000_Grains | Cereal (Malt-O-Meal Honey Nut Toasty O's)                                          | 73                 | 2.5                | D           | 4             |
| 57241200 | 1000_Grains | Cereal (Post Shredded Wheat Honey Nut)                                             | 72                 | 4                  | A           | 4             |
| 57143500 | 1000_Grains | Cereal (Post Great Grains, Cranberry Almond Crunch)                                | 72                 | 4                  | C           | 4             |
| 57301505 | 1000_Grains | Cereal (Kashi Autumn Wheat)                                                        | 72                 | 5                  | A           | 4             |
| 56203105 | 1000_Grains | Oatmeal, instant, plain, made with non-dairy milk, NS as to fat added in cooking   | 72                 | 3.5                | B           | 3             |
| 56203107 | 1000_Grains | Oatmeal, instant, plain, made with non-dairy milk, fat added in cooking            | 72                 | 3.5                | B           | 3             |
| 56200490 | 1000_Grains | Buckwheat groats, NS as to fat added in cooking                                    | 72                 | 4                  | A           | 1             |
| 56200500 | 1000_Grains | Buckwheat groats, fat not added in cooking                                         | 72                 | 4                  | A           | 1             |
| 56207370 | 1000_Grains | Wheat cereal, chocolate flavored, cooked                                           | 72                 | 3.5                | B           | 1             |
| 57327500 | 1000_Grains | Cereal (Quaker Oatmeal Squares)                                                    | 71                 | 4                  | B           | 4             |
| 57308400 | 1000_Grains | Cereal (General Mills Cheerios Multigrain)                                         | 71                 | 3                  | C           | 4             |
| 56205340 | 1000_Grains | Rice, brown and wild, cooked, fat added in cooking                                 | 71                 | 3.5                | B           | 2             |
| 57221810 | 1000_Grains | Cereal (General Mills Cheerios Fruity)                                             | 71                 | 2.5                | D           | 4             |
| 55300060 | 1000_Grains | French toast, from school, NFS                                                     | 71                 | 4                  | A           | 3             |
| 55301048 | 1000_Grains | French toast sticks, from school, NFS                                              | 71                 | 4                  | A           | 3             |
| 57329000 | 1000_Grains | Cereal, raisin bran                                                                | 70                 | 3.5                | C           | 4             |
| 57330000 | 1000_Grains | Cereal (Kellogg's Raisin Bran)                                                     | 70                 | 3.5                | C           | 4             |
| 56205012 | 1000_Grains | Rice, brown, cooked, fat added in cooking, made with oil                           | 70                 | 3.5                | B           | 2             |
| 57418000 | 1000_Grains | Cereal (General Mills Wheaties)                                                    | 70                 | 3                  | C           | 4             |
| 57228000 | 1000_Grains | Granola, homemade                                                                  | 70                 | 3                  | C           | 4             |
| 57307500 | 1000_Grains | Cereal, millet, puffed                                                             | 70                 | 4                  | A           | 4             |
| 56204000 | 1000_Grains | Quinoa, NS as to fat added in cooking                                              | 70                 | 3.5                | A           | 4             |
| 56204010 | 1000_Grains | Quinoa, fat added in cooking                                                       | 70                 | 3.5                | A           | 4             |
| 56203087 | 1000_Grains | Oatmeal, instant, plain, made with water, fat added in cooking                     | 69                 | 3.5                | A           | 3             |
| 57103100 | 1000_Grains | Cereal (General Mills Cheerios Apple Cinnamon)                                     | 69                 | 2.5                | D           | 4             |
| 51300140 | 1000_Grains | Bread, whole wheat, made from home recipe or purchased at bakery                   | 69                 | 4                  | B           | 2             |
| 57213850 | 1000_Grains | Cereal (General Mills Cheerios Frosted)                                            | 69                 | 2.5                | D           | 4             |
| 57237200 | 1000_Grains | Cereal (Post Honey Bunches of Oats with Vanilla Bunches)                           | 69                 | 4                  | B           | 4             |
| 56205210 | 1000_Grains | Rice, wild, 100%, cooked, fat not added in cooking                                 | 69                 | 3.5                | A           | 1             |
| 57304100 | 1000_Grains | Cereal (Quaker Life)                                                               | 69                 | 3                  | C           | 4             |
| 51300150 | 1000_Grains | Bread, whole wheat, made from home recipe or purchased at bakery, toasted          | 68                 | 4                  | C           | 2             |
| 57128005 | 1000_Grains | Cereal (General Mills 25% Less Sugar Cocoa Puffs)                                  | 68                 | 2.5                | C           | 4             |
| 56207110 | 1000_Grains | Bulgur, fat not added in cooking                                                   | 68                 | 4                  | A           | 1             |
| 56207130 | 1000_Grains | Bulgur, NS as to fat added in cooking                                              | 68                 | 4                  | A           | 1             |
| 57335550 | 1000_Grains | Cereal (General Mills Reese's Puffs)                                               | 68                 | 1.5                | D           | 4             |
| 57206800 | 1000_Grains | Cereal (Health Valley Fiber 7 Flakes)                                              | 67                 | 4.5                | B           | 4             |
| 57124100 | 1000_Grains | Cereal (General Mills Cheerios Chocolate)                                          | 67                 | 2                  | D           | 4             |
| 57332100 | 1000_Grains | Cereal (General Mills Raisin Nut Bran)                                             | 67                 | 3                  | C           | 4             |
| 51807000 | 1000_Grains | Injera, Ethiopian bread                                                            | 67                 | 3.5                | A           | 4             |
| 56203075 | 1000_Grains | Oatmeal, regular or quick, made with non-dairy milk, NS as to fat added in cooking | 67                 | 3.5                | A           | 3             |
| 56203077 | 1000_Grains | Oatmeal, regular or quick, made with non-dairy milk, fat added in cooking          | 67                 | 3.5                | A           | 3             |
| 55105000 | 1000_Grains | Pancakes, buckwheat                                                                | 67                 | 3                  | B           | 3             |
| 57316380 | 1000_Grains | Cereal (General Mills Cheerios Oat Cluster Crunch)                                 | 67                 | 2.5                | C           | 4             |
| 57100100 | 1000_Grains | Cereal, ready-to-eat, NFS                                                          | 67                 | 2.5                | C           | 4             |
| 57106260 | 1000_Grains | Cereal (General Mills Cheerios Berry Burst)                                        | 67                 | 2.5                | D           | 4             |
| 57102000 | 1000_Grains | Cereal (Alpen)                                                                     | 67                 | 4.5                | A           | 4             |
| 53720100 | 1000_Grains | Nutrition bar (Balance Original Bar)                                               | 66                 | 2                  | D           | 4             |
| 57209000 | 1000_Grains | Cereal (Post Bran Flakes)                                                          | 66                 | 3.5                | C           | 4             |
| 57410000 | 1000_Grains | Cereal (Weetabix Whole Grain)                                                      | 66                 | 4.5                | A           | 4             |
| 57206715 | 1000_Grains | Cereal (General Mills Fiber One Raisin Bran Clusters)                              | 66                 | 4                  | C           | 4             |
| 57206710 | 1000_Grains | Cereal (General Mills Fiber One Honey Clusters)                                    | 66                 | 4                  | C           | 4             |
| 57124300 | 1000_Grains | Cereal (General Mills Lucky Charms Chocolate)                                      | 65                 | 2                  | D           | 4             |
| 56205310 | 1000_Grains | Rice, brown and wild, cooked, fat not added in cooking                             | 65                 | 3.5                | B           | 1             |
| 56205018 | 1000_Grains | Rice, brown, cooked, fat not added in cooking                                      | 65                 | 3.5                | B           | 1             |
| 56203095 | 1000_Grains | Oatmeal, instant, plain, made with milk, NS as to fat added in cooking             | 65                 | 3.5                | B           | 3             |
| 56203097 | 1000_Grains | Oatmeal, instant, plain, made with milk, fat added in cooking                      | 65                 | 3.5                | B           | 3             |
| 56205011 | 1000_Grains | Rice, brown, cooked, NS as to fat added in cooking                                 | 65                 | 3.5                | B           | 1             |
| 57231000 | 1000_Grains | Cereal (Post Grape-Nuts Flakes)                                                    | 64                 | 4                  | C           | 4             |
| 57413000 | 1000_Grains | Wheat germ, with sugar and honey                                                   | 64                 | 5                  | A           | 4             |
| 56203066 | 1000_Grains | Oatmeal, regular or quick, made with milk, fat not added in cooking                | 64                 | 3.5                | A           | 1             |
| 56201990 | 1000_Grains | Millet, NS as to fat added in cooking                                              | 64                 | 3.5                | A           | 1             |
| 56202000 | 1000_Grains | Millet, fat not added in cooking                                                   | 64                 | 3.5                | A           | 1             |

| foodcode | level1nd    | Description                                                                 | Food Compass Score | Health Star Rating | Nutri-Score | NOVA Category |
|----------|-------------|-----------------------------------------------------------------------------|--------------------|--------------------|-------------|---------------|
| 56203130 | 1000_Grains | Oatmeal, instant, maple flavored, fat not added in cooking                  | 64                 | 3.5                | B           | 4             |
| 56203175 | 1000_Grains | Oatmeal, instant, other flavors, fat not added in cooking                   | 64                 | 3.5                | B           | 4             |
| 53720700 | 1000_Grains | Nutrition bar (Tiger's Milk)                                                | 64                 | 2                  | D           | 4             |
| 53720300 | 1000_Grains | Nutrition bar (PowerBar)                                                    | 64                 | 2.5                | C           | 4             |
| 57301530 | 1000_Grains | Cereal (Kashi Heart to Heart Honey Toasted Oat)                             | 63                 | 4.5                | A           | 4             |
| 56200510 | 1000_Grains | Buckwheat groats, fat added in cooking                                      | 63                 | 4                  | A           | 4             |
| 57125000 | 1000_Grains | Cereal (General Mills Cinnamon Toast Crunch)                                | 63                 | 2.5                | D           | 4             |
| 51320550 | 1000_Grains | Roll, whole wheat, hot dog bun                                              | 63                 | 4                  | A           | 4             |
| 51320560 | 1000_Grains | Roll, whole wheat, hamburger bun                                            | 63                 | 4                  | A           | 4             |
| 56203155 | 1000_Grains | Oatmeal, instant, fruit flavored, fat not added in cooking                  | 63                 | 3.5                | B           | 4             |
| 56205017 | 1000_Grains | Rice, brown, cooked, fat added in cooking, NS as to type of fat             | 63                 | 3.5                | B           | 3             |
| 56207120 | 1000_Grains | Bulgur, fat added in cooking                                                | 62                 | 4                  | A           | 4             |
| 56207190 | 1000_Grains | Whole wheat cereal, cooked, NS as to fat added in cooking                   | 62                 | 3.5                | A           | 3             |
| 56207210 | 1000_Grains | Whole wheat cereal, cooked, fat added in cooking                            | 62                 | 3.5                | A           | 3             |
| 56203500 | 1000_Grains | Oatmeal, reduced sugar, plain, NS as to fat added in cooking                | 62                 | 3.5                | B           | 3             |
| 56203520 | 1000_Grains | Oatmeal, reduced sugar, plain, fat added in cooking                         | 62                 | 3.5                | B           | 3             |
| 56203550 | 1000_Grains | Oatmeal, reduced sugar, flavored, NS as to fat added in cooking             | 62                 | 3.5                | B           | 3             |
| 56203560 | 1000_Grains | Oatmeal, reduced sugar, flavored, fat added in cooking                      | 62                 | 3.5                | B           | 3             |
| 57301512 | 1000_Grains | Cereal (Kashi GOLEAN Crunch Honey Almond Flax)                              | 61                 | 4.5                | B           | 4             |
| 56203055 | 1000_Grains | Oatmeal, regular or quick, made with water, NS as to fat added in cooking   | 61                 | 4                  | A           | 3             |
| 56203057 | 1000_Grains | Oatmeal, regular or quick, made with water, fat added in cooking            | 61                 | 4                  | A           | 3             |
| 56202960 | 1000_Grains | Oatmeal, NS as to regular, quick, or instant, NS as to fat added in cooking | 61                 | 4                  | A           | 3             |
| 56203040 | 1000_Grains | Oatmeal, NS as to regular, quick, or instant, fat added in cooking          | 61                 | 4                  | A           | 3             |
| 53720500 | 1000_Grains | Nutrition bar (Snickers Marathon Protein Bar)                               | 61                 | 2.5                | D           | 4             |
| 57331000 | 1000_Grains | Cereal (Post Raisin Bran)                                                   | 61                 | 3                  | C           | 4             |
| 57128000 | 1000_Grains | Cereal (General Mills Cocoa Puffs)                                          | 61                 | 2                  | D           | 4             |
| 56202900 | 1000_Grains | Oatmeal, from fast food, plain                                              | 61                 | 3.5                | A           | 1             |
| 51300110 | 1000_Grains | Bread, whole wheat                                                          | 61                 | 4                  | A           | 4             |
| 57206000 | 1000_Grains | Cereal (Famila)                                                             | 60                 | 4                  | A           | 4             |
| 57320500 | 1000_Grains | Cereal (Quaker Granola with Oats, Honey, and Raisins)                       | 60                 | 4                  | C           | 4             |
| 58174000 | 1000_Grains | Upma, Indian breakfast dish                                                 | 60                 | 4.5                | B           | 2             |
| 51300120 | 1000_Grains | Bread, whole wheat, toasted                                                 | 60                 | 4                  | A           | 4             |
| 57103000 | 1000_Grains | Cereal (Post Alpha-Bits)                                                    | 60                 | 2.5                | C           | 4             |
| 57301511 | 1000_Grains | Cereal (Kashi GOLEAN Crunch)                                                | 60                 | 4.5                | C           | 4             |
| 57307010 | 1000_Grains | Cereal (Post Maple Pecan Crunch)                                            | 60                 | 3.5                | C           | 4             |
| 57106060 | 1000_Grains | Cereal (General Mills Cheerios Banana Nut)                                  | 60                 | 2.5                | D           | 4             |
| 57219000 | 1000_Grains | Cereal, fruit and fiber                                                     | 59                 | 4                  | C           | 4             |
| 57221000 | 1000_Grains | Cereal, fiber and fruit                                                     | 59                 | 4                  | C           | 4             |
| 57101000 | 1000_Grains | Cereal (Kellogg's All-Bran)                                                 | 59                 | 5                  | A           | 4             |
| 51601020 | 1000_Grains | Bread, multigrain                                                           | 59                 | 4.5                | A           | 4             |
| 56203125 | 1000_Grains | Oatmeal, instant, maple flavored, NS as to fat added in cooking             | 59                 | 3.5                | B           | 3             |
| 56203135 | 1000_Grains | Oatmeal, instant, maple flavored, fat added in cooking                      | 59                 | 3.5                | B           | 3             |
| 56203170 | 1000_Grains | Oatmeal, instant, other flavors, NS as to fat added in cooking              | 59                 | 3.5                | B           | 3             |
| 56203180 | 1000_Grains | Oatmeal, instant, other flavors, fat added in cooking                       | 59                 | 3.5                | B           | 3             |
| 51122300 | 1000_Grains | Bread, white, special formula, added fiber                                  | 59                 | 4.5                | A           | 4             |
| 51300050 | 1000_Grains | Bread, whole grain white                                                    | 59                 | 4.5                | A           | 4             |
| 57130000 | 1000_Grains | Cereal (General Mills Cookie Crisp)                                         | 59                 | 2                  | D           | 4             |
| 56203085 | 1000_Grains | Oatmeal, instant, plain, made with water, NS as to fat added in cooking     | 59                 | 3.5                | A           | 4             |
| 51601010 | 1000_Grains | Bread, multigrain, toasted                                                  | 59                 | 4.5                | A           | 4             |
| 57305165 | 1000_Grains | Cereal (Malt-O-Meal Cinnamon Toasters)                                      | 59                 | 2                  | D           | 4             |
| 53720610 | 1000_Grains | Nutrition bar (South Beach Living High Protein Bar)                         | 58                 | 2.5                | C           | 4             |
| 56203065 | 1000_Grains | Oatmeal, regular or quick, made with milk, NS as to fat added in cooking    | 58                 | 3.5                | B           | 3             |
| 56203067 | 1000_Grains | Oatmeal, regular or quick, made with milk, fat added in cooking             | 58                 | 3.5                | B           | 3             |
| 57344025 | 1000_Grains | Cereal (Kellogg's Special K Cinnamon Pecan)                                 | 58                 | 3                  | D           | 4             |
| 57107000 | 1000_Grains | Cereal (General Mills Boo Berry)                                            | 58                 | 2.5                | C           | 4             |
| 53710504 | 1000_Grains | Cereal or granola bar (Kellogg's Nutri-Grain Fruit and Nut Bar)             | 58                 | 2.5                | C           | 4             |
| 51122310 | 1000_Grains | Bread, white, special formula, added fiber, toasted                         | 58                 | 4.5                | A           | 4             |
| 51300060 | 1000_Grains | Bread, whole grain white, toasted                                           | 58                 | 4.5                | A           | 4             |
| 53710802 | 1000_Grains | Cereal or granola bar (Kashi Crunchy)                                       | 57                 | 3.5                | C           | 4             |
| 57110000 | 1000_Grains | Cereal (Kellogg's All-Bran Bran Buds)                                       | 57                 | 3.5                | C           | 4             |
| 57211000 | 1000_Grains | Cereal (General Mills Frankenberry)                                         | 57                 | 2.5                | C           | 4             |
| 51601210 | 1000_Grains | Bread, multigrain, with raisins                                             | 57                 | 4                  | A           | 4             |
| 57139000 | 1000_Grains | Cereal (General Mills Count Chocula)                                        | 57                 | 2                  | D           | 4             |
| 57344007 | 1000_Grains | Cereal (Kellogg's Special K Low Fat Granola)                                | 57                 | 3                  | C           | 4             |
| 57229000 | 1000_Grains | Cereal (Kellogg's Low Fat Granola)                                          | 57                 | 3                  | C           | 4             |
| 52215260 | 1000_Grains | Tortilla, whole wheat                                                       | 57                 | 4                  | D           | 4             |
| 52104040 | 1000_Grains | Biscuit, whole wheat                                                        | 57                 | 2.5                | D           | 4             |
| 56205350 | 1000_Grains | Rice, brown and wild, cooked, NS as to fat added in cooking                 | 57                 | 3                  | C           | 3             |
| 51601220 | 1000_Grains | Bread, multigrain, with raisins, toasted                                    | 56                 | 4                  | A           | 4             |
| 57237300 | 1000_Grains | Cereal (Post Honey Bunches of Oats with Almonds)                            | 56                 | 2.5                | C           | 4             |
| 57419000 | 1000_Grains | Cereal (General Mills Cheerios Yogurt Burst)                                | 56                 | 2.5                | D           | 4             |
| 57305100 | 1000_Grains | Cereal (General Mills Lucky Charms)                                         | 56                 | 2                  | D           | 4             |
| 57227000 | 1000_Grains | Cereal, granola                                                             | 56                 | 3                  | C           | 4             |
| 57229500 | 1000_Grains | Cereal (Kellogg's Low Fat Granola with Raisins)                             | 56                 | 3                  | C           | 4             |
| 71945020 | 1000_Grains | Yam buns; Puerto Rican style                                                | 56                 | 4                  | C           | 3             |
| 57316450 | 1000_Grains | Cereal (General Mills Oatmeal Crisp with Almonds)                           | 56                 | 4                  | C           | 4             |
| 56205016 | 1000_Grains | Rice, brown, cooked, fat added in cooking, made with margarine              | 56                 | 3.5                | B           | 4             |
| 51301600 | 1000_Grains | Bread, pita, whole wheat                                                    | 55                 | 4                  | A           | 4             |
| 51301620 | 1000_Grains | Bread, pita, wheat or cracked wheat                                         | 55                 | 4                  | A           | 4             |
| 57124050 | 1000_Grains | Cereal (General Mills Chex Cinnamon)                                        | 55                 | 2                  | D           | 4             |
| 56202100 | 1000_Grains | Millet, fat added in cooking                                                | 55                 | 3.5                | B           | 4             |
| 57201900 | 1000_Grains | Cereal (General Mills Dora The Explorer)                                    | 55                 | 3                  | C           | 4             |
| 51301610 | 1000_Grains | Bread, pita, whole wheat, toasted                                           | 55                 | 4                  | A           | 4             |
| 51301630 | 1000_Grains | Bread, pita, wheat or cracked wheat, toasted                                | 55                 | 4                  | A           | 4             |
| 57137000 | 1000_Grains | Cereal, corn puffs                                                          | 55                 | 3.5                | C           | 4             |
| 57303100 | 1000_Grains | Cereal (General Mills Kix)                                                  | 55                 | 3.5                | C           | 4             |
| 57106250 | 1000_Grains | Cereal (General Mills Kix Berry Berry)                                      | 55                 | 2.5                | C           | 4             |
| 51300180 | 1000_Grains | Bread, puri, wheat                                                          | 54                 | 3.5                | B           | 4             |
| 56203600 | 1000_Grains | Oatmeal, multigrain, NS as to fat added in cooking                          | 54                 | 4                  | A           | 3             |
| 56203620 | 1000_Grains | Oatmeal, multigrain, fat added in cooking                                   | 54                 | 4                  | A           | 3             |
| 56203610 | 1000_Grains | Oatmeal, multigrain, fat not added in cooking                               | 54                 | 4                  | A           | 4             |
| 57327450 | 1000_Grains | Cereal (Quaker Toasted Oat Bran)                                            | 54                 | 4                  | C           | 4             |
| 55200130 | 1000_Grains | Waffle, whole grain, from fast food / restaurant                            | 53                 | 1.5                | D           | 3             |
| 56207102 | 1000_Grains | Cream of wheat, instant, made with non-dairy milk, fat not added in cooking | 53                 | 3.5                | B           | 2             |
| 57303105 | 1000_Grains | Cereal (General Mills Honey Kix)                                            | 53                 | 3                  | C           | 4             |
| 57230000 | 1000_Grains | Cereal (Post Grape-Nuts)                                                    | 53                 | 4.5                | B           | 4             |
| 57316200 | 1000_Grains | Cereal, nutty nuggets                                                       | 53                 | 4.5                | B           | 4             |
| 57301540 | 1000_Grains | Cereal (Kashi Honey Sunshine Squares)                                       | 53                 | 4                  | C           | 4             |
| 53720400 | 1000_Grains | Nutrition bar (Slim Fast Original Meal Bar)                                 | 53                 | 2                  | D           | 4             |
| 53720600 | 1000_Grains | Nutrition bar (South Beach Living Meal Bar)                                 | 53                 | 2                  | D           | 4             |
| 56205014 | 1000_Grains | Rice, brown, cooked, fat added in cooking, made with butter                 | 53                 | 3.5                | B           | 2             |
| 57237900 | 1000_Grains | Cereal (Post Honey Bunches of Oats Just Bunches)                            | 52                 | 2.5                | C           | 4             |

| foodcode | level1nd    | Description                                                                                | Food Compass Score | Health Star Rating | Nutri-Score | NOVA Category |
|----------|-------------|--------------------------------------------------------------------------------------------|--------------------|--------------------|-------------|---------------|
| 57237100 | 1000_Grains | Cereal (Post Honey Bunches of Oats Honey Roasted)                                          | 52                 | 2.5                | C           | 4             |
| 55200060 | 1000_Grains | Waffle, whole grain, from frozen                                                           | 51                 | 3.5                | B           | 4             |
| 55200080 | 1000_Grains | Waffle, whole grain, fruit, from frozen                                                    | 51                 | 3.5                | B           | 4             |
| 57341200 | 1000_Grains | Cereal (Kellogg's Smart Start Strong)                                                      | 51                 | 2.5                | C           | 4             |
| 53720800 | 1000_Grains | Nutrition bar (Zone Perfect Classic Crunch)                                                | 51                 | 1.5                | D           | 4             |
| 53729000 | 1000_Grains | Nutrition bar or meal replacement bar, NFS                                                 | 51                 | 1.5                | D           | 4             |
| 57344015 | 1000_Grains | Cereal (Kellogg's Special K Fruit & Yogurt)                                                | 50                 | 2.5                | D           | 4             |
| 55100070 | 1000_Grains | Pancakes, whole grain and nuts, from fast food / restaurant                                | 50                 | 2.5                | C           | 4             |
| 57321900 | 1000_Grains | Cereal (Nature's Path Organic Flax Plus)                                                   | 50                 | 4.5                | C           | 4             |
| 56208500 | 1000_Grains | Oat bran cereal, cooked, fat not added in cooking                                          | 50                 | 4                  | A           | 1             |
| 55100065 | 1000_Grains | Pancakes, whole grain, from fast food / restaurant                                         | 50                 | 2                  | D           | 3             |
| 53712210 | 1000_Grains | Cereal or granola bar, nonfat                                                              | 50                 | 2.5                | C           | 4             |
| 55205000 | 1000_Grains | Waffle, whole grain                                                                        | 49                 | 2                  | D           | 3             |
| 56207026 | 1000_Grains | Cream of wheat, regular or quick, made with non-dairy milk, fat not added in cooking       | 49                 | 3.5                | B           | 2             |
| 53710500 | 1000_Grains | Cereal or granola bar (Kellogg's Nutri-Grain Cereal Bar)                                   | 49                 | 2                  | C           | 4             |
| 53710502 | 1000_Grains | Cereal or granola bar (Kellogg's Nutri-Grain Yogurt Bar)                                   | 49                 | 2                  | C           | 4             |
| 57124030 | 1000_Grains | Cereal (General Mills Chex Chocolate)                                                      | 49                 | 1.5                | D           | 4             |
| 57237310 | 1000_Grains | Cereal (Post Honey Bunches of Oats wth Pecan Bunches)                                      | 49                 | 2.5                | C           | 4             |
| 57301510 | 1000_Grains | Cereal (Kashi GOLEAN)                                                                      | 49                 | 5                  | A           | 4             |
| 52303010 | 1000_Grains | Muffin, whole wheat                                                                        | 48                 | 2                  | D           | 4             |
| 56203150 | 1000_Grains | Oatmeal, instant, fruit flavored, NS as to fat added in cooking                            | 48                 | 3.5                | B           | 4             |
| 56203160 | 1000_Grains | Oatmeal, instant, fruit flavored, fat added in cooking                                     | 48                 | 3.5                | B           | 4             |
| 55100040 | 1000_Grains | Pancakes, gluten free, from frozen                                                         | 48                 | 3.5                | B           | 4             |
| 55106000 | 1000_Grains | Pancakes, gluten free                                                                      | 48                 | 3.5                | B           | 4             |
| 55200200 | 1000_Grains | Waffle, from school, NFS                                                                   | 48                 | 3.5                | B           | 4             |
| 57305150 | 1000_Grains | Cereal, frosted oat cereal with marshmallows                                               | 48                 | 2                  | D           | 4             |
| 57305600 | 1000_Grains | Cereal (Malt-O-Meal Marshmallow Mateys)                                                    | 47                 | 1.5                | D           | 4             |
| 55200070 | 1000_Grains | Waffle, whole grain, reduced fat, from frozen                                              | 47                 | 3.5                | B           | 4             |
| 57106100 | 1000_Grains | Cereal (General Mills Basic 4)                                                             | 47                 | 3                  | C           | 4             |
| 53710902 | 1000_Grains | Cereal or granola bar, with yogurt coating (General Mills Nature Valley Chewy Granola Bar) | 47                 | 2                  | D           | 4             |
| 55200090 | 1000_Grains | Waffle, gluten free, from frozen                                                           | 47                 | 3                  | C           | 4             |
| 55208000 | 1000_Grains | Waffle, gluten free                                                                        | 47                 | 3                  | C           | 4             |
| 57344020 | 1000_Grains | Cereal (Kellogg's Special K Vanilla Almond)                                                | 47                 | 2.5                | D           | 4             |
| 51300210 | 1000_Grains | Bread, whole wheat, with raisins                                                           | 47                 | 3                  | C           | 4             |
| 51806010 | 1000_Grains | Bread, rice                                                                                | 46                 | 3.5                | B           | 4             |
| 51808000 | 1000_Grains | Bread, gluten free                                                                         | 46                 | 3.5                | B           | 4             |
| 57104000 | 1000_Grains | Cereal (Kellogg's Apple Jacks)                                                             | 46                 | 2.5                | D           | 4             |
| 51300220 | 1000_Grains | Bread, whole wheat, with raisins, toasted                                                  | 46                 | 3                  | C           | 4             |
| 57316300 | 1000_Grains | Cereal (Health Valley Oat Bran Flakes)                                                     | 46                 | 3                  | C           | 4             |
| 53720200 | 1000_Grains | Nutrition bar (Clif Bar)                                                                   | 46                 | 3                  | C           | 4             |
| 51806020 | 1000_Grains | Bread, rice, toasted                                                                       | 46                 | 3                  | B           | 4             |
| 51808010 | 1000_Grains | Bread, gluten free, toasted                                                                | 46                 | 3                  | B           | 4             |
| 55105200 | 1000_Grains | Pancakes, whole grain                                                                      | 45                 | 2                  | D           | 3             |
| 57407100 | 1000_Grains | Cereal (General Mills Trix)                                                                | 45                 | 2                  | D           | 4             |
| 57306130 | 1000_Grains | Cereal (Malt-O-Meal Raisin Bran)                                                           | 45                 | 2.5                | D           | 4             |
| 57407110 | 1000_Grains | Cereal (General Mills 25% Less Sugar Trix)                                                 | 45                 | 2.5                | C           | 4             |
| 57316500 | 1000_Grains | Cereal (General Mills Oatmeal Crisp with Raisins)                                          | 45                 | 3.5                | C           | 4             |
| 53710900 | 1000_Grains | Cereal or granola bar (General Mills Nature Valley Chewy Trail Mix)                        | 45                 | 2                  | D           | 4             |
| 53710400 | 1000_Grains | Cereal or granola bar (General Mills Fiber One Chewy Bar)                                  | 45                 | 3.5                | C           | 4             |
| 53714300 | 1000_Grains | Cereal or granola bar, high fiber, coated with non-chocolate yogurt coating                | 45                 | 3.5                | C           | 4             |
| 57301535 | 1000_Grains | Cereal (Kashi Heart to Heart Oat Flakes and Blueberry Clusters)                            | 44                 | 4                  | C           | 4             |
| 55105205 | 1000_Grains | Pancakes, whole grain, reduced fat                                                         | 44                 | 2.5                | C           | 3             |
| 57143000 | 1000_Grains | Cereal (Kellogg's Cracklin' Oat Bran)                                                      | 44                 | 2.5                | D           | 4             |
| 57305160 | 1000_Grains | Cereal (Malt-O-Meal Blueberry Muffin Tops)                                                 | 44                 | 2                  | D           | 4             |
| 57305400 | 1000_Grains | Cereal (Malt-O-Meal Honey Graham Squares)                                                  | 44                 | 2                  | D           | 4             |
| 56201066 | 1000_Grains | Grits, regular or quick, made with non-dairy milk, fat not added in cooking                | 44                 | 3.5                | B           | 2             |
| 57224000 | 1000_Grains | Cereal (General Mills Golden Grahams)                                                      | 44                 | 2                  | D           | 4             |
| 56201355 | 1000_Grains | Grits, instant, made with non-dairy milk, fat not added in cooking                         | 43                 | 3.5                | B           | 2             |
| 57330010 | 1000_Grains | Cereal (Kellogg's Raisin Bran Crunch)                                                      | 43                 | 2.5                | C           | 4             |
| 55301025 | 1000_Grains | French toast, gluten free                                                                  | 43                 | 3                  | C           | 3             |
| 57409100 | 1000_Grains | Cereal (Post Waffle Crisp)                                                                 | 43                 | 2                  | D           | 4             |
| 57213010 | 1000_Grains | Cereal (Kellogg's Froot Loops Marshmallow)                                                 | 43                 | 2                  | D           | 4             |
| 56116990 | 1000_Grains | Long rice noodles, made from mung beans, cooked                                            | 43                 | 4.5                | A           | 1             |
| 56208510 | 1000_Grains | Oat bran cereal, cooked, fat added in cooking                                              | 43                 | 4                  | A           | 3             |
| 56208520 | 1000_Grains | Oat bran cereal, cooked, NS as to fat added in cooking                                     | 43                 | 4                  | A           | 3             |
| 57344001 | 1000_Grains | Cereal (Kellogg's Special K Blueberry)                                                     | 43                 | 3                  | C           | 4             |
| 57132000 | 1000_Grains | Cereal (General Mills Chex Corn)                                                           | 43                 | 2.5                | C           | 4             |
| 55702100 | 1000_Grains | Dosa (Indian), plain                                                                       | 42                 | 4                  | B           | 2             |
| 57213000 | 1000_Grains | Cereal (Kellogg's Froot Loops)                                                             | 42                 | 2.5                | D           | 4             |
| 57221700 | 1000_Grains | Cereal, fruit rings                                                                        | 42                 | 2.5                | D           | 4             |
| 57221800 | 1000_Grains | Cereal, fruit whirls                                                                       | 42                 | 2.5                | D           | 4             |
| 55301020 | 1000_Grains | French toast, whole grain, reduced fat                                                     | 42                 | 3.5                | B           | 3             |
| 51123010 | 1000_Grains | Bread, high protein                                                                        | 42                 | 4                  | A           | 4             |
| 55301015 | 1000_Grains | French toast, whole grain                                                                  | 41                 | 3                  | C           | 3             |
| 55301055 | 1000_Grains | French toast sticks, whole grain                                                           | 41                 | 3                  | C           | 3             |
| 57240100 | 1000_Grains | Cereal (General Mills Chex Honey Nut)                                                      | 41                 | 2                  | D           | 4             |
| 57336000 | 1000_Grains | Cereal (General Mills Chex Rice)                                                           | 41                 | 2.5                | D           | 4             |
| 51301540 | 1000_Grains | Bread, French or Vienna, whole wheat                                                       | 41                 | 4                  | A           | 4             |
| 51123020 | 1000_Grains | Bread, high protein, toasted                                                               | 41                 | 4                  | A           | 4             |
| 57355000 | 1000_Grains | Cereal (Post Golden Crisp)                                                                 | 41                 | 2                  | C           | 4             |
| 56207101 | 1000_Grains | Cream of wheat, instant, made with non-dairy milk, NS as to fat added in cooking           | 40                 | 3                  | C           | 3             |
| 56207103 | 1000_Grains | Cream of wheat, instant, made with non-dairy milk, fat added in cooking                    | 40                 | 3                  | C           | 3             |
| 57124200 | 1000_Grains | Cereal, chocolate flavored, frosted, puffed corn                                           | 40                 | 1.5                | D           | 4             |
| 57344010 | 1000_Grains | Cereal (Kellogg's Special K Red Berries)                                                   | 40                 | 2.5                | D           | 4             |
| 57124900 | 1000_Grains | Cereal (Kellogg's Cinnabon)                                                                | 40                 | 1.5                | D           | 4             |
| 51301550 | 1000_Grains | Bread, French or Vienna, whole wheat, toasted                                              | 39                 | 4                  | A           | 4             |
| 53710906 | 1000_Grains | Cereal or granola bar (General Mills Nature Valley Crunchy Granola Bar)                    | 39                 | 2                  | D           | 4             |
| 53712100 | 1000_Grains | Cereal or Granola bar, NFS                                                                 | 39                 | 2                  | D           | 4             |
| 53713100 | 1000_Grains | Cereal or granola bar, peanuts, oats, sugar, wheat germ                                    | 39                 | 2                  | D           | 4             |
| 56207025 | 1000_Grains | Cream of wheat, regular or quick, made with non-dairy milk, NS as to fat added in cooking  | 39                 | 3.5                | B           | 3             |
| 56207027 | 1000_Grains | Cream of wheat, regular or quick, made with non-dairy milk, fat added in cooking           | 39                 | 3.5                | B           | 3             |
| 56207022 | 1000_Grains | Cream of wheat, regular or quick, made with milk, fat not added in cooking                 | 39                 | 3.5                | B           | 1             |
| 51102010 | 1000_Grains | Bread, white with whole wheat swirl                                                        | 39                 | 4                  | A           | 4             |
| 57301520 | 1000_Grains | Cereal (Kashi Good Friends)                                                                | 39                 | 5                  | A           | 4             |
| 57106530 | 1000_Grains | Cereal (Post Selects Blueberry Morning)                                                    | 38                 | 2.5                | C           | 4             |
| 57344005 | 1000_Grains | Cereal (Kellogg's Special K Chocolatey Delight)                                            | 38                 | 2                  | D           | 4             |
| 51300175 | 1000_Grains | Bread, chappatti or roti, wheat                                                            | 38                 | 4                  | B           | 4             |
| 57305170 | 1000_Grains | Cereal (Malt-O-Meal Coco-Roos)                                                             | 38                 | 1.5                | D           | 4             |
| 57303200 | 1000_Grains | Cereal (Kellogg's Krave)                                                                   | 37                 | 2                  | D           | 4             |
| 57125900 | 1000_Grains | Cereal (General Mills Honey Nut Clusters)                                                  | 37                 | 2.5                | C           | 4             |
| 41425010 | 1000_Grains | Vermicelli, made from soybeans                                                             | 37                 | 3.5                | B           | 4             |
| 55200120 | 1000_Grains | Waffle, fruit, from fast food / restaurant                                                 | 37                 | 2                  | D           | 3             |

| foodcode | level1nd    | Description                                                                          | Food Compass Score | Health Star Rating | Nutri-Score | NOVA Category |
|----------|-------------|--------------------------------------------------------------------------------------|--------------------|--------------------|-------------|---------------|
| 51102020 | 1000_Grains | Bread, white with whole wheat swirl, toasted                                         | 37                 | 4                  | B           | 4             |
| 56207095 | 1000_Grains | Cream of wheat, instant, made with milk, fat not added in cooking                    | 36                 | 3.5                | B           | 1             |
| 55212000 | 1000_Grains | Waffle, whole grain, reduced fat                                                     | 36                 | 2                  | D           | 4             |
| 57323000 | 1000_Grains | Cereal (Quaker Sweet Crunch)                                                         | 35                 | 0.5                | E           | 4             |
| 57328000 | 1000_Grains | Cereal (Quaker Quisp)                                                                | 35                 | 0.5                | E           | 4             |
| 53710904 | 1000_Grains | Cereal or granola bar (General Mills Nature Valley Sweet and Salty Granola Bar)      | 35                 | 1                  | E           | 4             |
| 55200100 | 1000_Grains | Waffle, plain, from fast food / restaurant                                           | 35                 | 1.5                | D           | 3             |
| 57243000 | 1000_Grains | Cereal (Kellogg's Honey Smacks)                                                      | 34                 | 2                  | C           | 4             |
| 57306500 | 1000_Grains | Cereal (Malt-O-Meal Golden Puffs)                                                    | 34                 | 2                  | C           | 4             |
| 57416010 | 1000_Grains | Cereal, puffed wheat, sweetened                                                      | 34                 | 2                  | C           | 4             |
| 51404010 | 1000_Grains | Bread, pumpernickel                                                                  | 34                 | 4                  | A           | 4             |
| 51404550 | 1000_Grains | Muffin, English, pumpernickel                                                        | 34                 | 4                  | A           | 4             |
| 51407010 | 1000_Grains | Bread, black                                                                         | 34                 | 4                  | A           | 4             |
| 56201342 | 1000_Grains | Grits, instant, made with milk, fat not added in cooking                             | 34                 | 3.5                | B           | 1             |
| 55300040 | 1000_Grains | French toast, gluten free, from frozen                                               | 34                 | 3.5                | B           | 4             |
| 56203540 | 1000_Grains | Oatmeal, made with milk and sugar, Puerto Rican style                                | 34                 | 3                  | C           | 1             |
| 56201065 | 1000_Grains | Grits, regular or quick, made with non-dairy milk, NS as to fat added in cooking     | 34                 | 3.5                | B           | 3             |
| 56201067 | 1000_Grains | Grits, regular or quick, made with non-dairy milk, fat added in cooking              | 34                 | 3.5                | B           | 3             |
| 57120000 | 1000_Grains | Cereal (Quaker Cap'n Crunch's Peanut Butter Crunch)                                  | 34                 | 1                  | E           | 4             |
| 56207021 | 1000_Grains | Cream of wheat, regular or quick, made with milk, NS as to fat added in cooking      | 33                 | 3                  | C           | 3             |
| 56207023 | 1000_Grains | Cream of wheat, regular or quick, made with milk, fat added in cooking               | 33                 | 3                  | C           | 3             |
| 51404020 | 1000_Grains | Bread, pumpernickel, toasted                                                         | 33                 | 4                  | B           | 4             |
| 51407020 | 1000_Grains | Bread, black, toasted                                                                | 33                 | 4                  | B           | 4             |
| 51808100 | 1000_Grains | Roll, gluten free                                                                    | 33                 | 3.5                | B           | 4             |
| 75217500 | 1000_Grains | Hominy, cooked, fat not added in cooking                                             | 33                 | 4                  | C           | 3             |
| 56201350 | 1000_Grains | Grits, instant, made with non-dairy milk, NS as to fat added in cooking              | 33                 | 3                  | C           | 3             |
| 56201360 | 1000_Grains | Grits, instant, made with non-dairy milk, fat added in cooking                       | 33                 | 3                  | C           | 3             |
| 56201056 | 1000_Grains | Grits, regular or quick, made with milk, fat not added in cooking                    | 33                 | 3.5                | B           | 1             |
| 55501000 | 1000_Grains | Chinese pancake                                                                      | 33                 | 3.5                | B           | 1             |
| 53711002 | 1000_Grains | Cereal or granola bar (Quaker Chewy 90 Calorie Granola Bar)                          | 33                 | 2                  | D           | 4             |
| 53712200 | 1000_Grains | Cereal or granola bar, lowfat, NFS                                                   | 33                 | 2                  | D           | 4             |
| 53711000 | 1000_Grains | Cereal or granola bar (Quaker Chewy Granola Bar)                                     | 32                 | 1.5                | D           | 4             |
| 55300030 | 1000_Grains | French toast, whole grain, from frozen                                               | 32                 | 3.5                | A           | 4             |
| 56207094 | 1000_Grains | Cream of wheat, instant, made with milk, fat added in cooking                        | 32                 | 3.5                | B           | 3             |
| 56207096 | 1000_Grains | Cream of wheat, instant, made with milk, NS as to fat added in cooking               | 32                 | 3.5                | B           | 3             |
| 56201340 | 1000_Grains | Grits, instant, made with milk, fat added in cooking                                 | 32                 | 3                  | B           | 3             |
| 56201344 | 1000_Grains | Grits, instant, made with milk, NS as to fat added in cooking                        | 32                 | 3                  | B           | 3             |
| 51301510 | 1000_Grains | Bread, wheat or cracked wheat, reduced calorie and/or high fiber                     | 32                 | 5                  | A           | 4             |
| 51401060 | 1000_Grains | Bread, rye, reduced calorie and/or high fiber                                        | 32                 | 5                  | A           | 4             |
| 51501060 | 1000_Grains | Bread, oat bran, reduced calorie and/or high fiber                                   | 32                 | 5                  | A           | 4             |
| 51602010 | 1000_Grains | Bread, multigrain, reduced calorie and/or high fiber                                 | 32                 | 5                  | A           | 4             |
| 58117110 | 1000_Grains | Cornmeal fritter, Puerto Rican style                                                 | 32                 | 2                  | D           | 2             |
| 53714230 | 1000_Grains | Cereal or granola bar, oats, nuts, coated with non-chocolate coating                 | 32                 | 1.5                | D           | 4             |
| 57309100 | 1000_Grains | Cereal (Nature Valley Granola)                                                       | 32                 | 2.5                | D           | 4             |
| 53430000 | 1000_Grains | Crepes, NS as to filling                                                             | 31                 | 3                  | C           | 3             |
| 53712000 | 1000_Grains | Snack bar, oatmeal                                                                   | 31                 | 2                  | D           | 4             |
| 53714500 | 1000_Grains | Breakfast bar, NFS                                                                   | 31                 | 2                  | D           | 4             |
| 53714520 | 1000_Grains | Breakfast bar, cereal crust with fruit filling, lowfat                               | 31                 | 2                  | D           | 4             |
| 55100080 | 1000_Grains | Pancakes, from school, NFS                                                           | 31                 | 3.5                | B           | 4             |
| 51301520 | 1000_Grains | Bread, wheat or cracked wheat, reduced calorie and/or high fiber, toasted            | 31                 | 5                  | A           | 4             |
| 51401070 | 1000_Grains | Bread, rye, reduced calorie and/or high fiber, toasted                               | 31                 | 5                  | A           | 4             |
| 51501070 | 1000_Grains | Bread, oat bran, reduced calorie and/or high fiber, toasted                          | 31                 | 5                  | A           | 4             |
| 51602020 | 1000_Grains | Bread, multigrain, reduced calorie and/or high fiber, toasted                        | 31                 | 5                  | A           | 4             |
| 56113990 | 1000_Grains | Noodles, vegetable, cooked                                                           | 30                 | 4                  | A           | 1             |
| 55100055 | 1000_Grains | Pancakes, with fruit, from fast food / restaurant                                    | 30                 | 3                  | C           | 3             |
| 56201055 | 1000_Grains | Grits, regular or quick, made with milk, NS as to fat added in cooking               | 30                 | 3                  | C           | 3             |
| 56201057 | 1000_Grains | Grits, regular or quick, made with milk, fat added in cooking                        | 30                 | 3                  | C           | 3             |
| 53710800 | 1000_Grains | Cereal or granola bar (Kashi Chewy)                                                  | 30                 | 2                  | D           | 4             |
| 53430200 | 1000_Grains | Crepes, fruit filled                                                                 | 29                 | 3                  | C           | 3             |
| 51503040 | 1000_Grains | Muffin, English, oat bran, with raisins                                              | 29                 | 3.5                | B           | 4             |
| 55204000 | 1000_Grains | Waffle, cornmeal                                                                     | 29                 | 3                  | C           | 2             |
| 55203700 | 1000_Grains | Waffle, cinnamon                                                                     | 28                 | 2                  | D           | 3             |
| 53714250 | 1000_Grains | Cereal or granola bar, coated with non-chocolate coating                             | 28                 | 0.5                | E           | 4             |
| 51301040 | 1000_Grains | Bread, wheat or cracked wheat, made from home recipe or purchased at bakery          | 28                 | 3.5                | B           | 2             |
| 51108100 | 1000_Grains | Naan, Indian flatbread                                                               | 28                 | 3.5                | C           | 4             |
| 55103000 | 1000_Grains | Pancakes, with fruit                                                                 | 28                 | 3                  | C           | 3             |
| 56112000 | 1000_Grains | Noodles, cooked                                                                      | 28                 | 3.5                | B           | 1             |
| 56205410 | 1000_Grains | Rice, white, cooked with fat, Puerto Rican style                                     | 28                 | 3                  | C           | 2             |
| 51300185 | 1000_Grains | Bread, paratha, wheat                                                                | 28                 | 3                  | C           | 4             |
| 71930200 | 1000_Grains | Casabe, cassava bread                                                                | 28                 | 3                  | C           | 1             |
| 55100050 | 1000_Grains | Pancakes, plain, from fast food / restaurant                                         | 27                 | 2                  | D           | 3             |
| 56207030 | 1000_Grains | Cream of wheat, instant, made with water, fat not added in cooking                   | 27                 | 3.5                | B           | 2             |
| 51320700 | 1000_Grains | Roll, whole grain white                                                              | 27                 | 3                  | C           | 4             |
| 51320710 | 1000_Grains | Roll, whole grain white, hot dog bun                                                 | 27                 | 3                  | C           | 4             |
| 51320720 | 1000_Grains | Roll, whole grain white, hamburger bun                                               | 27                 | 3                  | C           | 4             |
| 55103020 | 1000_Grains | Pancakes, pumpkin                                                                    | 27                 | 3                  | C           | 3             |
| 51301050 | 1000_Grains | Bread, wheat or cracked wheat, made from home recipe or purchased at bakery, toasted | 27                 | 3.5                | C           | 2             |
| 55300055 | 1000_Grains | French toast, whole grain, from fast food / restaurant                               | 27                 | 2.5                | C           | 4             |
| 53711004 | 1000_Grains | Cereal or granola bar (Quaker Chewy 25% Less Sugar Granola Bar)                      | 27                 | 2                  | D           | 4             |
| 53713000 | 1000_Grains | Cereal or granola bar, reduced sugar, NFS                                            | 27                 | 2                  | D           | 4             |
| 55200040 | 1000_Grains | Waffle, fruit, from frozen                                                           | 27                 | 3                  | C           | 4             |
| 57302100 | 1000_Grains | Cereal (Quaker King Vitaman)                                                         | 27                 | 2                  | D           | 4             |
| 56207060 | 1000_Grains | Cream of wheat, instant, made with water, fat added in cooking                       | 26                 | 3.5                | B           | 3             |
| 56207070 | 1000_Grains | Cream of wheat, instant, made with water, NS as to fat added in cooking              | 26                 | 3.5                | B           | 3             |
| 53720210 | 1000_Grains | Nutrition bar (Clif Kids Organic Zbar)                                               | 26                 | 2.5                | D           | 4             |
| 55200010 | 1000_Grains | Waffle, NFS                                                                          | 26                 | 3                  | C           | 4             |
| 55200020 | 1000_Grains | Waffle, plain, from frozen                                                           | 26                 | 3                  | C           | 4             |
| 55200110 | 1000_Grains | Waffle, chocolate, from fast food / restaurant                                       | 26                 | 1                  | E           | 3             |
| 56140100 | 1000_Grains | Pasta, gluten free                                                                   | 26                 | 3.5                | B           | 1             |
| 58117210 | 1000_Grains | Cornmeal stick, Puerto Rican style                                                   | 26                 | 2.5                | C           | 2             |
| 57238000 | 1000_Grains | Cereal (Post Honeycomb)                                                              | 26                 | 2                  | D           | 4             |
| 51501010 | 1000_Grains | Bread, oatmeal                                                                       | 26                 | 3.5                | A           | 4             |
| 51502010 | 1000_Grains | Roll, oatmeal                                                                        | 26                 | 3.5                | A           | 4             |
| 51503000 | 1000_Grains | Muffin, English, oat bran                                                            | 26                 | 3.5                | A           | 4             |
| 51501040 | 1000_Grains | Bread, oat bran                                                                      | 26                 | 3.5                | B           | 4             |
| 56205094 | 1000_Grains | Rice, cream of, cooked, made with milk                                               | 26                 | 3.5                | B           | 3             |
| 52304000 | 1000_Grains | Muffin, whole grain                                                                  | 26                 | 2                  | D           | 4             |
| 52303500 | 1000_Grains | Muffin, wheat                                                                        | 26                 | 2                  | D           | 4             |
| 51302520 | 1000_Grains | Muffin, English, wheat bran, with raisins                                            | 25                 | 4                  | A           | 4             |
| 56205002 | 1000_Grains | Rice, white, cooked, fat added in cooking, made with oil                             | 25                 | 3.5                | B           | 2             |
| 51501020 | 1000_Grains | Bread, oatmeal, toasted                                                              | 25                 | 3.5                | A           | 4             |
| 51501050 | 1000_Grains | Bread, oat bran, toasted                                                             | 25                 | 3.5                | A           | 4             |

| foodcode | level1nd    | Description                                                                   | Food Compass Score | Health Star Rating | Nutri-Score | NOVA Category |
|----------|-------------|-------------------------------------------------------------------------------|--------------------|--------------------|-------------|---------------|
| 52405010 | 1000_Grains | Bread, fruit                                                                  | 25                 | 2                  | D           | 4             |
| 57126000 | 1000_Grains | Cereal (Kellogg's Cocoa Krispies)                                             | 24                 | 1.5                | D           | 4             |
| 56201091 | 1000_Grains | Grits, with cheese, fat not added in cooking                                  | 24                 | 3.5                | B           | 2             |
| 51184250 | 1000_Grains | Breadsticks, soft, topped with melted cheese                                  | 24                 | 2                  | D           | 4             |
| 51184260 | 1000_Grains | Breadsticks, soft, stuffed with melted cheese                                 | 24                 | 2                  | D           | 4             |
| 57131000 | 1000_Grains | Cereal (Quaker Corn Bran Crunch)                                              | 24                 | 3                  | D           | 4             |
| 57305174 | 1000_Grains | Cereal (Malt-O-Meal Colossal Crunch)                                          | 24                 | 1                  | E           | 4             |
| 51303050 | 1000_Grains | Muffin, English, wheat or cracked wheat, with raisins                         | 24                 | 4                  | A           | 4             |
| 51303070 | 1000_Grains | Muffin, English, whole wheat, with raisins                                    | 24                 | 4                  | A           | 4             |
| 75217490 | 1000_Grains | Hominy, cooked, NS as to fat added in cooking                                 | 24                 | 4                  | C           | 3             |
| 75217520 | 1000_Grains | Hominy, cooked, fat added in cooking                                          | 24                 | 4                  | C           | 3             |
| 52304150 | 1000_Grains | Muffin, oat bran                                                              | 24                 | 3.5                | B           | 4             |
| 51320010 | 1000_Grains | Roll, wheat or cracked wheat                                                  | 23                 | 3.5                | A           | 4             |
| 51320500 | 1000_Grains | Roll, whole wheat                                                             | 23                 | 3.5                | A           | 4             |
| 56104000 | 1000_Grains | Pasta, vegetable, cooked                                                      | 23                 | 4                  | A           | 1             |
| 52403000 | 1000_Grains | Bread, nut                                                                    | 23                 | 2                  | D           | 4             |
| 51801010 | 1000_Grains | Bread, barley                                                                 | 23                 | 3.5                | A           | 4             |
| 52401000 | 1000_Grains | Bread, Boston Brown                                                           | 23                 | 3.5                | A           | 4             |
| 51301010 | 1000_Grains | Bread, wheat or cracked wheat                                                 | 23                 | 3.5                | A           | 4             |
| 57306800 | 1000_Grains | Cereal (Malt-O-Meal Tootie Fruities)                                          | 23                 | 1.5                | D           | 4             |
| 55100030 | 1000_Grains | Pancakes, whole grain, from frozen                                            | 23                 | 3                  | B           | 4             |
| 55100035 | 1000_Grains | Pancakes, whole grain, reduced fat, from frozen                               | 23                 | 3                  | B           | 4             |
| 56201090 | 1000_Grains | Grits, with cheese, NS as to fat added in cooking                             | 23                 | 3.5                | B           | 3             |
| 56201092 | 1000_Grains | Grits, with cheese, fat added in cooking                                      | 23                 | 3.5                | B           | 3             |
| 55100005 | 1000_Grains | Pancakes, NFS                                                                 | 23                 | 2                  | D           | 3             |
| 56200390 | 1000_Grains | Barley, NS as to fat added in cooking                                         | 23                 | 4                  | A           | 1             |
| 56200400 | 1000_Grains | Barley, fat not added in cooking                                              | 23                 | 4                  | A           | 1             |
| 55200050 | 1000_Grains | Waffle, chocolate, from frozen                                                | 23                 | 3                  | C           | 4             |
| 51801020 | 1000_Grains | Bread, barley, toasted                                                        | 22                 | 4                  | A           | 4             |
| 51301020 | 1000_Grains | Bread, wheat or cracked wheat, toasted                                        | 22                 | 4                  | A           | 4             |
| 56205320 | 1000_Grains | Rice, white and wild, cooked, fat added in cooking                            | 22                 | 3                  | C           | 3             |
| 56205330 | 1000_Grains | Rice, white and wild, cooked, NS as to fat added in cooking                   | 22                 | 3                  | C           | 3             |
| 53400300 | 1000_Grains | Blintz, fruit-filled                                                          | 22                 | 3                  | C           | 3             |
| 51301820 | 1000_Grains | Bagel, wheat, with fruit and nuts                                             | 22                 | 3.5                | A           | 4             |
| 57349020 | 1000_Grains | Cereal (Kellogg's Frosted Flakes, Reduced Sugar)                              | 22                 | 3                  | C           | 4             |
| 57347000 | 1000_Grains | Cereal (Kellogg's Corn Pops)                                                  | 22                 | 3                  | C           | 4             |
| 55101000 | 1000_Grains | Pancakes, plain                                                               | 22                 | 2                  | D           | 3             |
| 52304100 | 1000_Grains | Muffin, oatmeal                                                               | 22                 | 2                  | D           | 4             |
| 56207050 | 1000_Grains | Wheat, cream of, cooked, made with milk and sugar, Puerto Rican style         | 22                 | 3                  | C           | 1             |
| 51320060 | 1000_Grains | Roll, wheat or cracked wheat, hot dog bun                                     | 22                 | 4                  | A           | 4             |
| 51320070 | 1000_Grains | Roll, wheat or cracked wheat, hamburger bun                                   | 22                 | 4                  | A           | 4             |
| 52306300 | 1000_Grains | Muffin, cheese                                                                | 22                 | 2                  | D           | 4             |
| 57325000 | 1000_Grains | Cereal (Kellogg's Product 19)                                                 | 22                 | 2                  | D           | 4             |
| 55400010 | 1000_Grains | Crepe, NFS                                                                    | 22                 | 3                  | C           | 3             |
| 55203000 | 1000_Grains | Waffle, fruit                                                                 | 22                 | 2                  | D           | 4             |
| 56201210 | 1000_Grains | Grits, instant, made with water, fat not added in cooking                     | 22                 | 3.5                | B           | 1             |
| 56202910 | 1000_Grains | Oatmeal, from fast food, fruit flavored                                       | 21                 | 3.5                | B           | 4             |
| 56202905 | 1000_Grains | Oatmeal, from fast food, maple flavored                                       | 21                 | 3.5                | B           | 4             |
| 56202920 | 1000_Grains | Oatmeal, from fast food, other flavors                                        | 21                 | 3.5                | B           | 4             |
| 57119000 | 1000_Grains | Cereal (Quaker Cap'n Crunch's Crunchberries)                                  | 21                 | 1                  | E           | 4             |
| 56201220 | 1000_Grains | Grits, instant, made with water, fat added in cooking                         | 21                 | 3                  | C           | 3             |
| 56201230 | 1000_Grains | Grits, instant, made with water, NS as to fat added in cooking                | 21                 | 3                  | C           | 3             |
| 57117500 | 1000_Grains | Cereal (Quaker Christmas Crunch)                                              | 21                 | 1                  | E           | 4             |
| 53714220 | 1000_Grains | Cereal or granola bar with nuts, chocolate coated                             | 21                 | 1                  | D           | 4             |
| 53403100 | 1000_Grains | Crepe, chocolate filled                                                       | 21                 | 3                  | C           | 3             |
| 55401000 | 1000_Grains | Crepe, plain                                                                  | 21                 | 3                  | C           | 3             |
| 57127000 | 1000_Grains | Cereal (Post Cocoa Pebbles)                                                   | 21                 | 1.5                | D           | 4             |
| 57117000 | 1000_Grains | Cereal (Quaker Cap'n Crunch)                                                  | 21                 | 1                  | E           | 4             |
| 57340000 | 1000_Grains | Cereal, puffed rice                                                           | 21                 | 3.5                | A           | 4             |
| 56130000 | 1000_Grains | Pasta, cooked                                                                 | 21                 | 3.5                | A           | 1             |
| 55300010 | 1000_Grains | French toast, NFS                                                             | 20                 | 3                  | C           | 3             |
| 52206060 | 1000_Grains | Cornbread muffin, stick, round, made from home recipe                         | 20                 | 3                  | C           | 2             |
| 53711100 | 1000_Grains | Cereal or granola bar (Quaker Granola Bites)                                  | 20                 | 1.5                | D           | 4             |
| 52202060 | 1000_Grains | Cornbread, made from home recipe                                              | 20                 | 3                  | C           | 2             |
| 55100060 | 1000_Grains | Pancakes, with chocolate, from fast food / restaurant                         | 20                 | 1.5                | D           | 3             |
| 53710700 | 1000_Grains | Cereal or granola bar (Kellogg's Special K bar)                               | 20                 | 1.5                | D           | 4             |
| 55100020 | 1000_Grains | Pancakes, with fruit, from frozen                                             | 20                 | 3                  | C           | 4             |
| 55301000 | 1000_Grains | French toast, plain                                                           | 20                 | 3                  | C           | 3             |
| 51183990 | 1000_Grains | Breadsticks, NFS                                                              | 19                 | 3                  | C           | 4             |
| 51184200 | 1000_Grains | Breadsticks, soft, NFS                                                        | 19                 | 3                  | C           | 4             |
| 51184210 | 1000_Grains | Breadsticks, soft, from fast food / restaurant                                | 19                 | 3                  | C           | 4             |
| 51303100 | 1000_Grains | Muffin, English, whole grain white                                            | 19                 | 4                  | A           | 4             |
| 51302500 | 1000_Grains | Muffin, English, wheat bran                                                   | 19                 | 4                  | A           | 4             |
| 51303010 | 1000_Grains | Muffin, English, wheat or cracked wheat                                       | 19                 | 4                  | A           | 4             |
| 51303030 | 1000_Grains | Muffin, English, whole wheat                                                  | 19                 | 4                  | A           | 4             |
| 51630200 | 1000_Grains | Muffin, English, multigrain                                                   | 19                 | 4                  | A           | 4             |
| 52215100 | 1000_Grains | Tortilla, corn                                                                | 19                 | 4.5                | A           | 4             |
| 52306700 | 1000_Grains | Muffin, carrot                                                                | 19                 | 2                  | D           | 4             |
| 52306500 | 1000_Grains | Muffin, pumpkin                                                               | 19                 | 2                  | D           | 4             |
| 52404060 | 1000_Grains | Bread, pumpkin                                                                | 19                 | 2                  | D           | 4             |
| 55100010 | 1000_Grains | Pancakes, plain, from frozen                                                  | 19                 | 3                  | C           | 4             |
| 56207016 | 1000_Grains | Cream of wheat, regular or quick, made with water, fat not added in cooking   | 19                 | 3.5                | B           | 1             |
| 56207000 | 1000_Grains | Cream of wheat, NS as to regular, quick, or instant, fat not added in cooking | 19                 | 3.5                | B           | 1             |
| 51184230 | 1000_Grains | Breadsticks, soft, with parmesan cheese, from fast food / restaurant          | 19                 | 2                  | D           | 4             |
| 53400200 | 1000_Grains | Blintz, cheese-filled                                                         | 19                 | 3                  | D           | 2             |
| 57305175 | 1000_Grains | Cereal (Malt-O-Meal Cocoa Dyno-Bites)                                         | 18                 | 1.5                | E           | 4             |
| 56205300 | 1000_Grains | Rice, white and wild, cooked, fat not added in cooking                        | 18                 | 3                  | C           | 4             |
| 51805010 | 1000_Grains | Bread, sunflower meal                                                         | 18                 | 3.5                | B           | 4             |
| 51108010 | 1000_Grains | Focaccia, Italian flatbread, plain                                            | 18                 | 3                  | B           | 4             |
| 51421000 | 1000_Grains | Roll, pumpernickel                                                            | 18                 | 4                  | A           | 4             |
| 56201051 | 1000_Grains | Grits, regular or quick, made with water, fat not added in cooking            | 18                 | 3.5                | B           | 1             |
| 56201000 | 1000_Grains | Grits, NS as to regular, quick, or instant, fat not added in cooking          | 18                 | 3.5                | B           | 1             |
| 51301805 | 1000_Grains | Bagel, whole wheat, with raisins                                              | 18                 | 3.5                | A           | 4             |
| 52208760 | 1000_Grains | Gordita/sope shell, plain, no filling                                         | 17                 | 3                  | C           | 4             |
| 51630100 | 1000_Grains | Bagel, multigrain, with raisins                                               | 17                 | 3.5                | A           | 4             |
| 51301800 | 1000_Grains | Bagel, wheat, with raisins                                                    | 17                 | 3.5                | A           | 4             |
| 55101015 | 1000_Grains | Pancakes, plain, reduced fat                                                  | 17                 | 2.5                | C           | 3             |
| 52302010 | 1000_Grains | Muffin, fruit                                                                 | 17                 | 2                  | D           | 4             |
| 55301040 | 1000_Grains | French toast sticks, plain, from fast food / restaurant                       | 17                 | 2                  | D           | 4             |
| 52301000 | 1000_Grains | Muffin, NFS                                                                   | 17                 | 2                  | D           | 4             |
| 51805020 | 1000_Grains | Bread, sunflower meal, toasted                                                | 17                 | 3                  | C           | 4             |
| 52306550 | 1000_Grains | Muffin, zucchini                                                              | 17                 | 2                  | D           | 4             |

| foodcode | level1nd    | Description                                                                                           | Food Compass Score | Health Star Rating | Nutri-Score | NOVA Category |
|----------|-------------|-------------------------------------------------------------------------------------------------------|--------------------|--------------------|-------------|---------------|
| 52407000 | 1000_Grains | Bread, zucchini                                                                                       | 17                 | 2                  | D           | 4             |
| 56200410 | 1000_Grains | Barley, fat added in cooking                                                                          | 17                 | 3.5                | A           | 3             |
| 56209000 | 1000_Grains | Cream of rye                                                                                          | 17                 | 3.5                | B           | 1             |
| 57134000 | 1000_Grains | Cereal, corn flakes                                                                                   | 17                 | 2.5                | C           | 4             |
| 57135000 | 1000_Grains | Cereal (Kellogg's Corn Flakes)                                                                        | 17                 | 2.5                | C           | 4             |
| 53711006 | 1000_Grains | Cereal or granola bar (Quaker Chewy Dippis Granola Bar)                                               | 17                 | 1                  | E           | 4             |
| 53714200 | 1000_Grains | Cereal or granola bar, chocolate coated, NFS                                                          | 17                 | 1                  | E           | 4             |
| 55201000 | 1000_Grains | Waffle, plain                                                                                         | 16                 | 2                  | D           | 4             |
| 56207005 | 1000_Grains | Cream of wheat, NS as to regular, quick, or instant, fat added in cooking                             | 16                 | 3.5                | B           | 3             |
| 56207015 | 1000_Grains | Cream of wheat, regular or quick, made with water, NS as to fat added in cooking                      | 16                 | 3.5                | B           | 3             |
| 56207017 | 1000_Grains | Cream of wheat, regular or quick, made with water, fat added in cooking                               | 16                 | 3.5                | B           | 3             |
| 56206990 | 1000_Grains | Cream of wheat, NS as to regular, quick, or instant, NS as to fat added in cooking                    | 16                 | 3.5                | B           | 3             |
| 55301050 | 1000_Grains | French toast sticks, plain                                                                            | 16                 | 2                  | D           | 4             |
| 52302600 | 1000_Grains | Muffin, chocolate                                                                                     | 16                 | 1.5                | D           | 4             |
| 55103100 | 1000_Grains | Pancakes, with chocolate                                                                              | 16                 | 1.5                | D           | 3             |
| 51111010 | 1000_Grains | Bread, cheese                                                                                         | 16                 | 1.5                | D           | 4             |
| 57326000 | 1000_Grains | Cereal (Barbara's Puffins)                                                                            | 16                 | 3.5                | C           | 4             |
| 56205060 | 1000_Grains | Rice, cooked, with milk                                                                               | 16                 | 3                  | C           | 1             |
| 57344000 | 1000_Grains | Cereal (Kellogg's Special K)                                                                          | 16                 | 2                  | D           | 4             |
| 51804010 | 1000_Grains | Bread, soy                                                                                            | 16                 | 3.5                | C           | 4             |
| 55300050 | 1000_Grains | French toast, plain, from fast food / restaurant                                                      | 16                 | 2                  | D           | 3             |
| 51111040 | 1000_Grains | Bread, cheese, toasted                                                                                | 16                 | 1.5                | D           | 4             |
| 55100025 | 1000_Grains | Pancakes, with chocolate, from frozen                                                                 | 15                 | 2.5                | C           | 4             |
| 51300100 | 1000_Grains | Bagel, whole grain white                                                                              | 15                 | 4                  | A           | 4             |
| 51301700 | 1000_Grains | Bagel, wheat                                                                                          | 15                 | 4                  | A           | 4             |
| 51301750 | 1000_Grains | Bagel, whole wheat                                                                                    | 15                 | 4                  | A           | 4             |
| 51301900 | 1000_Grains | Bagel, wheat bran                                                                                     | 15                 | 4                  | A           | 4             |
| 51404500 | 1000_Grains | Bagel, pumpernickel                                                                                   | 15                 | 4                  | A           | 4             |
| 51501080 | 1000_Grains | Bagel, oat bran                                                                                       | 15                 | 4                  | A           | 4             |
| 51630000 | 1000_Grains | Bagel, multigrain                                                                                     | 15                 | 4                  | A           | 4             |
| 53714210 | 1000_Grains | Cereal or granola bar, with coconut, chocolate coated                                                 | 15                 | 0.5                | E           | 4             |
| 51122000 | 1000_Grains | Bread, reduced calorie and/or high fiber, white or NFS                                                | 15                 | 4.5                | A           | 4             |
| 56205007 | 1000_Grains | Rice, white, cooked, fat added in cooking, NS as to type of fat                                       | 15                 | 3.5                | B           | 3             |
| 56201516 | 1000_Grains | Cornmeal mush, fat not added in cooking                                                               | 15                 | 3.5                | B           | 1             |
| 51804020 | 1000_Grains | Bread, soy, toasted                                                                                   | 15                 | 4                  | C           | 4             |
| 56205170 | 1000_Grains | Yellow rice, cooked, fat added in cooking                                                             | 14                 | 3                  | C           | 4             |
| 51184220 | 1000_Grains | Breadsticks, soft, from frozen                                                                        | 14                 | 3.5                | B           | 4             |
| 51184240 | 1000_Grains | Breadsticks, soft, with parmesan cheese, from frozen                                                  | 14                 | 3.5                | B           | 4             |
| 55301030 | 1000_Grains | French toast sticks, NFS                                                                              | 14                 | 3                  | C           | 4             |
| 55301031 | 1000_Grains | French toast sticks, plain, from frozen                                                               | 14                 | 3                  | C           | 4             |
| 56201050 | 1000_Grains | Grits, regular or quick, made with water, NS as to fat added in cooking                               | 14                 | 3.5                | B           | 3             |
| 56201052 | 1000_Grains | Grits, regular or quick, made with water, fat added in cooking                                        | 14                 | 3.5                | B           | 3             |
| 56200990 | 1000_Grains | Grits, NS as to regular, quick, or instant, NS as to fat added in cooking                             | 14                 | 3.5                | B           | 3             |
| 56201040 | 1000_Grains | Grits, NS as to regular, quick, or instant, fat added in cooking                                      | 14                 | 3.5                | B           | 3             |
| 51122010 | 1000_Grains | Bread, reduced calorie and/or high fiber, white or NFS, toasted                                       | 14                 | 4.5                | A           | 4             |
| 55310100 | 1000_Grains | Fried bread, Puerto Rican style                                                                       | 14                 | 2                  | D           | 2             |
| 51121035 | 1000_Grains | Garlic bread, from frozen                                                                             | 14                 | 2                  | D           | 4             |
| 57239100 | 1000_Grains | Cereal (Kellogg's Honey Crunch Corn Flakes)                                                           | 13                 | 1.5                | D           | 4             |
| 51121055 | 1000_Grains | Garlic bread, with parmesan cheese, from frozen                                                       | 13                 | 2                  | D           | 4             |
| 51121075 | 1000_Grains | Garlic bread, with melted cheese, from frozen                                                         | 13                 | 2                  | D           | 4             |
| 52306010 | 1000_Grains | Muffin, plain                                                                                         | 13                 | 1.5                | D           | 4             |
| 51122100 | 1000_Grains | Bread, reduced calorie and/or high fiber, white or NFS, with fruit and/or nuts                        | 13                 | 4                  | A           | 4             |
| 57348000 | 1000_Grains | Cereal, frosted corn flakes                                                                           | 13                 | 2                  | D           | 4             |
| 57349000 | 1000_Grains | Cereal (Kellogg's Frosted Flakes)                                                                     | 13                 | 2                  | D           | 4             |
| 51121015 | 1000_Grains | Garlic bread, NFS                                                                                     | 13                 | 2                  | D           | 4             |
| 51121025 | 1000_Grains | Garlic bread, from fast food / restaurant                                                             | 13                 | 2                  | D           | 4             |
| 51121065 | 1000_Grains | Garlic bread, with melted cheese, from fast food / restaurant                                         | 13                 | 2                  | D           | 4             |
| 56201550 | 1000_Grains | Cornmeal dumpling                                                                                     | 13                 | 3.5                | B           | 3             |
| 52213010 | 1000_Grains | Spoonbread                                                                                            | 13                 | 3                  | C           | 4             |
| 52104010 | 1000_Grains | Biscuit, baking powder or buttermilk type, made from home recipe                                      | 13                 | 2                  | D           | 3             |
| 51121045 | 1000_Grains | Garlic bread, with parmesan cheese, from fast food / restaurant                                       | 12                 | 2                  | D           | 4             |
| 53714510 | 1000_Grains | Breakfast bar, date, with yogurt coating                                                              | 12                 | 2                  | D           | 4             |
| 57223000 | 1000_Grains | Cereal (Post Fruity Pebbles)                                                                          | 12                 | 1                  | E           | 4             |
| 51109010 | 1000_Grains | Bread, Italian, Grecian, Armenian                                                                     | 12                 | 3.5                | B           | 4             |
| 51122110 | 1000_Grains | Bread, reduced calorie and/or high fiber, white or NFS, with fruit and/or nuts, toasted               | 12                 | 4                  | B           | 4             |
| 56201515 | 1000_Grains | Cornmeal mush, NS as to fat added in cooking                                                          | 12                 | 3.5                | B           | 3             |
| 56201517 | 1000_Grains | Cornmeal mush, fat added in cooking                                                                   | 12                 | 3.5                | B           | 3             |
| 52304040 | 1000_Grains | Muffin, bran with fruit, lowfat                                                                       | 12                 | 3                  | C           | 4             |
| 57305300 | 1000_Grains | Cereal (Malt-O-Meal Fruity Dyno-Bites)                                                                | 12                 | 1.5                | E           | 4             |
| 55211050 | 1000_Grains | Waffle, plain, reduced fat                                                                            | 11                 | 2                  | D           | 4             |
| 56201600 | 1000_Grains | Masa harina, cooked                                                                                   | 11                 | 3.5                | B           | 1             |
| 56207160 | 1000_Grains | Couscous, plain, cooked                                                                               | 11                 | 3.5                | B           | 1             |
| 57305180 | 1000_Grains | Cereal (Malt-O-Meal Corn Bursts)                                                                      | 11                 | 1                  | E           | 4             |
| 56205080 | 1000_Grains | Rice, creamed, made with milk and sugar, Puerto Rican style                                           | 11                 | 3.5                | B           | 1             |
| 51109040 | 1000_Grains | Bread, Italian, Grecian, Armenian, toasted                                                            | 11                 | 3.5                | B           | 4             |
| 52302500 | 1000_Grains | Muffin, chocolate chip                                                                                | 11                 | 1.5                | D           | 4             |
| 57148000 | 1000_Grains | Cereal (Kellogg's Crispix)                                                                            | 11                 | 2                  | D           | 4             |
| 52209010 | 1000_Grains | Hush puppy                                                                                            | 11                 | 2.5                | C           | 4             |
| 57305210 | 1000_Grains | Cereal (Malt-O-Meal Frosted Flakes)                                                                   | 10                 | 1.5                | D           | 4             |
| 51301120 | 1000_Grains | Bread, wheat or cracked wheat, with raisins                                                           | 10                 | 2.5                | C           | 4             |
| 56205050 | 1000_Grains | Rice, cream of, cooked, fat not added in cooking                                                      | 10                 | 3.5                | B           | 1             |
| 56201540 | 1000_Grains | Cornmeal, Puerto Rican Style                                                                          | 10                 | 3                  | C           | 1             |
| 53714400 | 1000_Grains | Cereal or granola bar, with rice cereal                                                               | 10                 | 2                  | D           | 4             |
| 51129010 | 1000_Grains | Bread, raisin                                                                                         | 10                 | 3.5                | B           | 4             |
| 55203600 | 1000_Grains | Waffle, chocolate                                                                                     | 10                 | 1.5                | E           | 4             |
| 51000400 | 1000_Grains | Roll, bran, NS as to type of bran                                                                     | 10                 | 3.5                | B           | 4             |
| 51620000 | 1000_Grains | Roll, multigrain                                                                                      | 10                 | 3.5                | B           | 4             |
| 51620020 | 1000_Grains | Roll, multigrain, hot dog bun                                                                         | 10                 | 3.5                | B           | 4             |
| 51620030 | 1000_Grains | Roll, multigrain, hamburger bun                                                                       | 10                 | 3.5                | B           | 4             |
| 55105100 | 1000_Grains | Pancakes, cornmeal                                                                                    | 9                  | 2.5                | C           | 3             |
| 57148500 | 1000_Grains | Cereal, crispy brown rice                                                                             | 9                  | 2.5                | D           | 4             |
| 57151000 | 1000_Grains | Cereal, crispy rice                                                                                   | 9                  | 2.5                | D           | 4             |
| 57337000 | 1000_Grains | Cereal, rice flakes                                                                                   | 9                  | 2.5                | D           | 4             |
| 51301130 | 1000_Grains | Bread, wheat or cracked wheat, with raisins, toasted                                                  | 9                  | 2.5                | C           | 4             |
| 57316710 | 1000_Grains | Cereal (Quaker Honey Graham OH's)                                                                     | 9                  | 0.5                | E           | 4             |
| 57305200 | 1000_Grains | Cereal (Malt-O-Meal Crispy Rice)                                                                      | 9                  | 2.5                | D           | 4             |
| 57339000 | 1000_Grains | Cereal (Kellogg's Rice Krispies)                                                                      | 9                  | 2.5                | D           | 4             |
| 53710600 | 1000_Grains | Milk 'n Cereal bar                                                                                    | 9                  | 0.5                | E           | 4             |
| 52101000 | 1000_Grains | Biscuit, baking powder or buttermilk type, NS as to made from mix, refrigerated dough, or home recipe | 9                  | 2                  | D           | 4             |
| 51129020 | 1000_Grains | Bread, raisin, toasted                                                                                | 9                  | 3.5                | B           | 4             |
| 57216000 | 1000_Grains | Cereal, frosted rice                                                                                  | 9                  | 1.5                | D           | 4             |
| 57218000 | 1000_Grains | Cereal (Kellogg's Frosted Krispies)                                                                   | 9                  | 1.5                | D           | 4             |



| foodcode | level1nd    | Description                                                                          | Food Compass Score | Health Star Rating | Nutri-Score | NOVA Category |
|----------|-------------|--------------------------------------------------------------------------------------|--------------------|--------------------|-------------|---------------|
| 52101040 | 1000_Grains | Crumpet                                                                              | 8                  | 3                  | B           | 4             |
| 52101050 | 1000_Grains | Crumpet, toasted                                                                     | 8                  | 3                  | B           | 4             |
| 56205092 | 1000_Grains | Rice, cream of, cooked, NS as to fat added in cooking                                | 8                  | 3.5                | B           | 3             |
| 56205090 | 1000_Grains | Rice, cream of, cooked, fat added in cooking                                         | 8                  | 3.5                | B           | 3             |
| 52101100 | 1000_Grains | Biscuit, baking powder or buttermilk type, made from mix                             | 8                  | 1.5                | D           | 3             |
| 51113010 | 1000_Grains | Bread, cinnamon                                                                      | 8                  | 3                  | B           | 4             |
| 51156500 | 1000_Grains | Roll, garlic                                                                         | 8                  | 3.5                | C           | 4             |
| 56103000 | 1000_Grains | Dumpling, plain                                                                      | 8                  | 3                  | C           | 3             |
| 51401010 | 1000_Grains | Bread, rye                                                                           | 8                  | 4                  | A           | 4             |
| 51401030 | 1000_Grains | Bread, marble rye and pumpernickel                                                   | 8                  | 4                  | A           | 4             |
| 51401200 | 1000_Grains | Muffin, English, rye                                                                 | 8                  | 4                  | A           | 4             |
| 51420000 | 1000_Grains | Roll, rye                                                                            | 8                  | 4                  | A           | 4             |
| 51000300 | 1000_Grains | Roll, hard, NS as to major flour                                                     | 8                  | 3.5                | B           | 4             |
| 51153000 | 1000_Grains | Roll, white, hard                                                                    | 8                  | 3.5                | B           | 4             |
| 56205006 | 1000_Grains | Rice, white, cooked, fat added in cooking, made with margarine                       | 8                  | 3.5                | B           | 4             |
| 51401020 | 1000_Grains | Bread, rye, toasted                                                                  | 7                  | 4                  | B           | 4             |
| 51401040 | 1000_Grains | Bread, marble rye and pumpernickel, toasted                                          | 7                  | 4                  | B           | 4             |
| 55200030 | 1000_Grains | Waffle, plain, reduced fat, from frozen                                              | 7                  | 3                  | B           | 4             |
| 55100015 | 1000_Grains | Pancakes, plain, reduced fat, from frozen                                            | 7                  | 2.5                | C           | 4             |
| 56205001 | 1000_Grains | Rice, white, cooked, NS as to fat added in cooking                                   | 7                  | 3.5                | B           | 1             |
| 51154600 | 1000_Grains | Roll, cheese                                                                         | 7                  | 3                  | C           | 4             |
| 56205008 | 1000_Grains | Rice, white, cooked, fat not added in cooking                                        | 7                  | 3.5                | B           | 1             |
| 56205000 | 1000_Grains | Rice, cooked, NFS                                                                    | 7                  | 3.5                | B           | 1             |
| 55301010 | 1000_Grains | French toast, plain, reduced fat                                                     | 6                  | 3.5                | B           | 4             |
| 51000110 | 1000_Grains | Bread, NS as to major flour, toasted                                                 | 6                  | 3.5                | B           | 4             |
| 51101010 | 1000_Grains | Bread, white, toasted                                                                | 6                  | 3.5                | B           | 4             |
| 51113100 | 1000_Grains | Bread, cinnamon, toasted                                                             | 6                  | 3.5                | B           | 4             |
| 51000100 | 1000_Grains | Bread, NS as to major flour                                                          | 6                  | 3.5                | B           | 4             |
| 51101000 | 1000_Grains | Bread, white                                                                         | 6                  | 3.5                | B           | 4             |
| 51158100 | 1000_Grains | Roll, Mexican, bolillo                                                               | 6                  | 3.5                | B           | 4             |
| 51127010 | 1000_Grains | Bread, potato                                                                        | 6                  | 4                  | A           | 4             |
| 51133010 | 1000_Grains | Bread, sour dough                                                                    | 6                  | 3.5                | B           | 4             |
| 51159000 | 1000_Grains | Roll, sour dough                                                                     | 6                  | 3.5                | B           | 4             |
| 51130510 | 1000_Grains | Bread, white, low sodium or no salt                                                  | 6                  | 3.5                | A           | 4             |
| 51300300 | 1000_Grains | Bread, sprouted wheat                                                                | 5                  | 4                  | A           | 4             |
| 52105200 | 1000_Grains | Scone, with fruit                                                                    | 5                  | 2                  | D           | 4             |
| 51127020 | 1000_Grains | Bread, potato, toasted                                                               | 5                  | 4                  | A           | 4             |
| 51300310 | 1000_Grains | Bread, sprouted wheat, toasted                                                       | 5                  | 4.5                | A           | 4             |
| 51133020 | 1000_Grains | Bread, sour dough, toasted                                                           | 5                  | 3.5                | B           | 4             |
| 51155000 | 1000_Grains | Roll, French or Vienna                                                               | 5                  | 3.5                | B           | 4             |
| 52104100 | 1000_Grains | Biscuit, cheese                                                                      | 5                  | 1.5                | D           | 4             |
| 51130520 | 1000_Grains | Bread, white, low sodium or no salt, toasted                                         | 5                  | 3.5                | A           | 4             |
| 51119010 | 1000_Grains | Bread, egg, Challah                                                                  | 4                  | 3.5                | B           | 4             |
| 51154550 | 1000_Grains | Roll, egg bread                                                                      | 4                  | 3.5                | B           | 4             |
| 51000180 | 1000_Grains | Bread, made from home recipe or purchased at a bakery, NS as to major flour          | 4                  | 3                  | C           | 2             |
| 51101050 | 1000_Grains | Bread, white, made from home recipe or purchased at a bakery                         | 4                  | 3                  | C           | 2             |
| 55300020 | 1000_Grains | French toast, plain, from frozen                                                     | 4                  | 3.5                | B           | 4             |
| 51000200 | 1000_Grains | Roll, NS as to major flour                                                           | 4                  | 3.5                | B           | 4             |
| 51150000 | 1000_Grains | Roll, white, soft                                                                    | 4                  | 3.5                | B           | 4             |
| 51154010 | 1000_Grains | Roll, white, hot dog bun                                                             | 4                  | 3.5                | B           | 4             |
| 51154100 | 1000_Grains | Roll, white, hamburger bun                                                           | 4                  | 3.5                | B           | 4             |
| 51157000 | 1000_Grains | Roll, white, hoagie, submarine                                                       | 4                  | 3.5                | B           | 4             |
| 56205101 | 1000_Grains | Congee                                                                               | 4                  | 3.5                | B           | 1             |
| 56205004 | 1000_Grains | Rice, white, cooked, fat added in cooking, made with butter                          | 4                  | 3                  | C           | 2             |
| 51186100 | 1000_Grains | Muffin, English, with raisins                                                        | 3                  | 3.5                | A           | 4             |
| 57339500 | 1000_Grains | Cereal (Kellogg's Rice Krispies Treats Cereal)                                       | 3                  | 1.5                | D           | 4             |
| 52215350 | 1000_Grains | Taco shell, flour                                                                    | 3                  | 1.5                | D           | 4             |
| 51119040 | 1000_Grains | Bread, egg, Challah, toasted                                                         | 3                  | 3.5                | B           | 4             |
| 51186160 | 1000_Grains | Muffin, English, with fruit other than raisins                                       | 3                  | 4                  | A           | 4             |
| 51000190 | 1000_Grains | Bread, made from home recipe or purchased at a bakery, toasted, NS as to major flour | 3                  | 3                  | C           | 2             |
| 51101060 | 1000_Grains | Bread, white, made from home recipe or purchased at a bakery, toasted                | 3                  | 3                  | C           | 2             |
| 52220110 | 1000_Grains | Arepá Dominicana                                                                     | 2                  | 2                  | D           | 4             |
| 56205130 | 1000_Grains | Yellow rice, cooked, NS as to fat added in cooking                                   | 2                  | 3                  | C           | 4             |
| 56205150 | 1000_Grains | Yellow rice, cooked, fat not added in cooking                                        | 2                  | 3                  | C           | 4             |
| 52105100 | 1000_Grains | Scone                                                                                | 1                  | 2                  | D           | 4             |
| 52215000 | 1000_Grains | Tortilla, NFS                                                                        | 1                  | 3.5                | A           | 4             |
| 52304010 | 1000_Grains | Muffin, wheat bran                                                                   | 1                  | 3                  | C           | 4             |
| 52215300 | 1000_Grains | Taco shell, corn                                                                     | 1                  | 2.5                | C           | 4             |
| 51105010 | 1000_Grains | Bread, Cuban                                                                         | 1                  | 3.5                | B           | 4             |
| 51105040 | 1000_Grains | Bread, Cuban, toasted                                                                | 1                  | 3.5                | C           | 4             |
| 51106010 | 1000_Grains | Bread, native, water, Puerto Rican style                                             | 1                  | 3                  | B           | 4             |
| 51106020 | 1000_Grains | Bread, native, water, toasted, Puerto Rican style                                    | 1                  | 3.5                | B           | 4             |
| 51106200 | 1000_Grains | Bread, lard, Puerto Rican style                                                      | 1                  | 3.5                | B           | 4             |
| 51106210 | 1000_Grains | Bread, lard, toasted, Puerto Rican style                                             | 1                  | 3                  | C           | 4             |
| 51106300 | 1000_Grains | Bread, caressed, Puerto Rican style                                                  | 1                  | 3                  | C           | 4             |
| 51106310 | 1000_Grains | Bread, caressed, toasted, Puerto Rican style                                         | 1                  | 3                  | C           | 4             |
| 51107010 | 1000_Grains | Bread, French or Vienna                                                              | 1                  | 3.5                | B           | 4             |
| 51107040 | 1000_Grains | Bread, French or Vienna, toasted                                                     | 1                  | 3.5                | B           | 4             |
| 51109100 | 1000_Grains | Bread, pita                                                                          | 1                  | 3.5                | B           | 4             |
| 51109110 | 1000_Grains | Bread, pita, toasted                                                                 | 1                  | 3.5                | B           | 4             |
| 51109150 | 1000_Grains | Bread, pita with fruit                                                               | 1                  | 3                  | B           | 4             |
| 51109200 | 1000_Grains | Bread, pita with fruit, toasted                                                      | 1                  | 3                  | B           | 4             |
| 51115010 | 1000_Grains | Bread, cornmeal and molasses                                                         | 1                  | 3                  | C           | 4             |
| 51115020 | 1000_Grains | Bread, cornmeal and molasses, toasted                                                | 1                  | 3                  | C           | 4             |
| 51121110 | 1000_Grains | Bread, onion                                                                         | 1                  | 3                  | B           | 4             |
| 51121120 | 1000_Grains | Bread, onion, toasted                                                                | 1                  | 3                  | B           | 4             |
| 51134000 | 1000_Grains | Bread, sweet potato                                                                  | 1                  | 3                  | B           | 4             |
| 51134010 | 1000_Grains | Bread, sweet potato, toasted                                                         | 1                  | 3                  | B           | 4             |
| 51135000 | 1000_Grains | Bread, vegetable                                                                     | 1                  | 3.5                | B           | 4             |
| 51135010 | 1000_Grains | Bread, vegetable, toasted                                                            | 1                  | 3                  | C           | 4             |
| 51140100 | 1000_Grains | Bread, dough, fried                                                                  | 1                  | 3                  | B           | 4             |
| 51154510 | 1000_Grains | Roll, diet                                                                           | 1                  | 3.5                | B           | 4             |
| 51180010 | 1000_Grains | Bagel                                                                                | 1                  | 3.5                | B           | 4             |
| 51180030 | 1000_Grains | Bagel, with raisins                                                                  | 1                  | 3                  | C           | 4             |
| 51180080 | 1000_Grains | Bagel, with fruit other than raisins                                                 | 1                  | 3.5                | B           | 4             |
| 51186010 | 1000_Grains | Muffin, English                                                                      | 1                  | 4                  | A           | 4             |
| 51186130 | 1000_Grains | Muffin, English, cheese                                                              | 1                  | 3.5                | A           | 4             |
| 52101030 | 1000_Grains | Biscuit dough, fried                                                                 | 1                  | 1.5                | D           | 4             |
| 52101150 | 1000_Grains | Biscuit, baking powder or buttermilk type, made from refrigerated dough, lowfat      | 1                  | 2                  | D           | 4             |
| 52102040 | 1000_Grains | Biscuit, baking powder or buttermilk type, made from refrigerated dough              | 1                  | 1.5                | D           | 4             |
| 52103000 | 1000_Grains | Biscuit, baking powder or buttermilk type, commercially baked                        | 1                  | 1                  | E           | 4             |
| 52104200 | 1000_Grains | Biscuit, cinnamon-raisin                                                             | 1                  | 1.5                | D           | 4             |

| foodcode | level1nd    | Description                     | Food Compass Score | Health Star Rating | Nutri-Score | NOVA Category |
|----------|-------------|---------------------------------|--------------------|--------------------|-------------|---------------|
| 52201000 | 1000_Grains | Cornbread, prepared from mix    | 1                  | 2                  | D           | 4             |
| 52206010 | 1000_Grains | Cornbread muffin, stick, round  | 1                  | 2.5                | C           | 4             |
| 52207010 | 1000_Grains | Corn flour patty or tart, fried | 1                  | 3                  | B           | 4             |
| 52208010 | 1000_Grains | Corn pone, baked                | 1                  | 3                  | B           | 4             |
| 52208020 | 1000_Grains | Corn pone, fried                | 1                  | 3                  | C           | 4             |
| 52211010 | 1000_Grains | Johnnycake                      | 1                  | 2                  | D           | 4             |
| 52215200 | 1000_Grains | Tortilla, flour                 | 1                  | 2.5                | C           | 4             |
| 52302020 | 1000_Grains | Muffin, fruit, low fat          | 1                  | 2.5                | C           | 4             |
| 52311010 | 1000_Grains | Popover                         | 1                  | 3                  | C           | 4             |
| 52408000 | 1000_Grains | Bread, Irish soda               | 1                  | 2                  | D           | 4             |
| 56117090 | 1000_Grains | Rice noodles, cooked            | 1                  | 3.5                | B           | 1             |
| 56205070 | 1000_Grains | Rice, sweet, cooked with honey  | 1                  | 3                  | C           | 2             |
| 56205190 | 1000_Grains | Rice, white, cooked, glutinous  | 1                  | 3.5                | B           | 1             |

| foodcode | level1nd   | Description                                                                                                  | Food Compass Score | Health Star Rating | Nutri-Score | NOVA Category |
|----------|------------|--------------------------------------------------------------------------------------------------------------|--------------------|--------------------|-------------|---------------|
| 61101010 | 2000_Fruit | Grapefruit, raw                                                                                              | 100                | 4.5                | A           | 1             |
| 61104010 | 2000_Fruit | Grapefruit and orange sections, raw                                                                          | 100                | 4.5                | A           | 1             |
| 61113010 | 2000_Fruit | Lemon, raw                                                                                                   | 100                | 4.5                | A           | 1             |
| 61116010 | 2000_Fruit | Lime, raw                                                                                                    | 100                | 4.5                | A           | 1             |
| 61122350 | 2000_Fruit | Orange, mandarin, canned or frozen, drained                                                                  | 100                | 4.5                | A           | 3             |
| 63103010 | 2000_Fruit | Apricot, raw                                                                                                 | 100                | 4.5                | A           | 1             |
| 63103120 | 2000_Fruit | Apricot, cooked or canned, unsweetened, water pack                                                           | 100                | 4.5                | A           | 1             |
| 63109010 | 2000_Fruit | Cantaloupe, raw                                                                                              | 100                | 4.5                | A           | 1             |
| 63109610 | 2000_Fruit | Cantaloupe, frozen                                                                                           | 100                | 4.5                | A           | 1             |
| 63109700 | 2000_Fruit | Starfruit, raw                                                                                               | 100                | 4.5                | A           | 1             |
| 63110010 | 2000_Fruit | Cassaba melon, raw                                                                                           | 100                | 4.5                | A           | 1             |
| 63117010 | 2000_Fruit | Currants, raw                                                                                                | 100                | 5                  | A           | 1             |
| 63131010 | 2000_Fruit | Nectarine, raw                                                                                               | 100                | 4.5                | A           | 1             |
| 63133010 | 2000_Fruit | Papaya, raw                                                                                                  | 100                | 4.5                | A           | 1             |
| 63135010 | 2000_Fruit | Peach, raw                                                                                                   | 100                | 4.5                | A           | 1             |
| 63135620 | 2000_Fruit | Peach, frozen, unsweetened                                                                                   | 100                | 4.5                | A           | 1             |
| 63147010 | 2000_Fruit | Rhubarb, raw                                                                                                 | 100                | 4.5                | A           | 1             |
| 63147120 | 2000_Fruit | Rhubarb, cooked or canned, unsweetened                                                                       | 100                | 4.5                | A           | 1             |
| 63200100 | 2000_Fruit | Berries, raw, NFS                                                                                            | 100                | 4.5                | A           | 1             |
| 63201010 | 2000_Fruit | Blackberries, raw                                                                                            | 100                | 5                  | A           | 1             |
| 63201600 | 2000_Fruit | Blackberries, frozen                                                                                         | 100                | 5                  | A           | 1             |
| 63205010 | 2000_Fruit | Boysenberries, raw                                                                                           | 100                | 5                  | A           | 1             |
| 63205600 | 2000_Fruit | Boysenberries, frozen                                                                                        | 100                | 5                  | A           | 1             |
| 63207010 | 2000_Fruit | Cranberries, raw                                                                                             | 100                | 5                  | A           | 1             |
| 63208000 | 2000_Fruit | Dewberries, raw                                                                                              | 100                | 5                  | A           | 1             |
| 63215010 | 2000_Fruit | Loganberries, raw                                                                                            | 100                | 5                  | A           | 1             |
| 63215600 | 2000_Fruit | Loganberries, frozen                                                                                         | 100                | 5                  | A           | 1             |
| 63217010 | 2000_Fruit | Mulberries, raw                                                                                              | 100                | 4.5                | A           | 1             |
| 63219000 | 2000_Fruit | Raspberries, raw, NS as to color                                                                             | 100                | 5                  | A           | 1             |
| 63219010 | 2000_Fruit | Raspberries, black, raw                                                                                      | 100                | 5                  | A           | 1             |
| 63219020 | 2000_Fruit | Raspberries, red, raw                                                                                        | 100                | 5                  | A           | 1             |
| 63219120 | 2000_Fruit | Raspberries, cooked or canned, unsweetened, water pack                                                       | 100                | 5                  | A           | 1             |
| 63219610 | 2000_Fruit | Raspberries, frozen, unsweetened                                                                             | 100                | 5                  | A           | 1             |
| 63223020 | 2000_Fruit | Strawberries, raw                                                                                            | 100                | 4.5                | A           | 1             |
| 63223120 | 2000_Fruit | Strawberries, cooked or canned, unsweetened, water pack                                                      | 100                | 4.5                | A           | 1             |
| 63223610 | 2000_Fruit | Strawberries, frozen, unsweetened                                                                            | 100                | 4.5                | A           | 1             |
| 63224000 | 2000_Fruit | Youngberries, raw                                                                                            | 100                | 5                  | A           | 1             |
| 61119010 | 2000_Fruit | Orange, raw                                                                                                  | 100                | 4.5                | A           | 1             |
| 61125000 | 2000_Fruit | Tangelo, raw                                                                                                 | 100                | 4.5                | A           | 1             |
| 61104220 | 2000_Fruit | Grapefruit and orange sections, cooked, canned, or frozen, unsweetened, water pack                           | 100                | 4.5                | A           | 1             |
| 63149010 | 2000_Fruit | Watermelon, raw                                                                                              | 99                 | 4.5                | A           | 1             |
| 63311050 | 2000_Fruit | Fruit salad, fresh or raw, including citrus fruits, no dressing                                              | 99                 | 4.5                | A           | 1             |
| 63200200 | 2000_Fruit | Berries, frozen, NFS                                                                                         | 98                 | 4.5                | A           | 1             |
| 63203570 | 2000_Fruit | Blueberries, frozen, NS as to sweetened or unsweetened                                                       | 98                 | 4.5                | A           | 1             |
| 63203600 | 2000_Fruit | Blueberries, frozen, unsweetened                                                                             | 98                 | 4.5                | A           | 1             |
| 63115200 | 2000_Fruit | Cherries, frozen                                                                                             | 98                 | 4.5                | A           | 1             |
| 63125010 | 2000_Fruit | Guava, raw                                                                                                   | 98                 | 5                  | A           | 1             |
| 63135120 | 2000_Fruit | Peach, cooked or canned, unsweetened, water pack                                                             | 98                 | 4.5                | A           | 1             |
| 63126500 | 2000_Fruit | Kiwi fruit, raw                                                                                              | 97                 | 4.5                | A           | 1             |
| 63113010 | 2000_Fruit | Cherries, sour, red, raw                                                                                     | 97                 | 4.5                | A           | 1             |
| 62114000 | 2000_Fruit | Lychée, dried                                                                                                | 96                 | 3                  | B           | 1             |
| 63311000 | 2000_Fruit | Fruit salad, fresh or raw, excluding citrus fruits, no dressing                                              | 95                 | 4.5                | A           | 1             |
| 63127010 | 2000_Fruit | Honeydew melon, raw                                                                                          | 95                 | 4.5                | A           | 1             |
| 63127610 | 2000_Fruit | Honeydew, frozen                                                                                             | 95                 | 4.5                | A           | 1             |
| 63126010 | 2000_Fruit | Juneberry, raw                                                                                               | 95                 | 4.5                | A           | 1             |
| 63203010 | 2000_Fruit | Blueberries, raw                                                                                             | 95                 | 4.5                | A           | 1             |
| 63214000 | 2000_Fruit | Huckleberries, raw                                                                                           | 95                 | 4.5                | A           | 1             |
| 63311080 | 2000_Fruit | Fruit cocktail or mix, frozen                                                                                | 94                 | 4.5                | A           | 1             |
| 63137050 | 2000_Fruit | Pear, Japanese, raw                                                                                          | 94                 | 4.5                | A           | 1             |
| 63143010 | 2000_Fruit | Plum, raw                                                                                                    | 93                 | 4.5                | A           | 1             |
| 62104100 | 2000_Fruit | Apricot, dried, uncooked                                                                                     | 92                 | 3.5                | B           | 1             |
| 61100500 | 2000_Fruit | Calamondin, raw                                                                                              | 92                 | 4.5                | A           | 1             |
| 61125010 | 2000_Fruit | Tangerine, raw                                                                                               | 92                 | 4.5                | A           | 1             |
| 61110010 | 2000_Fruit | Kumquat, raw                                                                                                 | 92                 | 5                  | A           | 1             |
| 63101000 | 2000_Fruit | Apple, raw                                                                                                   | 92                 | 4.5                | A           | 1             |
| 62116100 | 2000_Fruit | Peach, dried, uncooked                                                                                       | 91                 | 4                  | C           | 1             |
| 61122320 | 2000_Fruit | Orange, mandarin, canned or frozen, juice pack                                                               | 91                 | 4.5                | A           | 3             |
| 62116220 | 2000_Fruit | Peach, dried, cooked, unsweetened                                                                            | 90                 | 4                  | A           | 1             |
| 63141010 | 2000_Fruit | Pineapple, raw                                                                                               | 90                 | 4.5                | A           | 1             |
| 63101320 | 2000_Fruit | Apple, baked, unsweetened                                                                                    | 90                 | 4.5                | A           | 1             |
| 61122300 | 2000_Fruit | Orange, mandarin, canned or frozen, NS as to sweetened or unsweetened; sweetened, NS as to type of sweetener | 90                 | 4.5                | A           | 3             |
| 63129010 | 2000_Fruit | Mango, raw                                                                                                   | 90                 | 4                  | A           | 1             |
| 63141120 | 2000_Fruit | Pineapple, cooked or canned, unsweetened, waterpack                                                          | 89                 | 4.5                | A           | 1             |
| 63134010 | 2000_Fruit | Passion fruit, raw                                                                                           | 89                 | 5                  | A           | 1             |
| 63100100 | 2000_Fruit | Fruit, NS as to type                                                                                         | 88                 | 4.5                | A           | 1             |
| 63133050 | 2000_Fruit | Papaya, green, cooked                                                                                        | 88                 | 4.5                | A           | 1             |
| 63403030 | 2000_Fruit | Fruit salad, including citrus fruits, with nondairy whipped topping                                          | 88                 | 4                  | A           | 2             |
| 63113110 | 2000_Fruit | Cherries, sour, red, cooked, unsweetened                                                                     | 88                 | 4.5                | A           | 1             |
| 63123020 | 2000_Fruit | Grapes, American type, slip skin, raw                                                                        | 88                 | 4                  | A           | 1             |
| 61119020 | 2000_Fruit | Orange, sections, canned, juice pack                                                                         | 88                 | 4.5                | A           | 3             |
| 62104220 | 2000_Fruit | Apricot, dried, cooked, unsweetened                                                                          | 86                 | 4                  | B           | 1             |
| 63223030 | 2000_Fruit | Strawberries, raw, with sugar                                                                                | 86                 | 4.5                | A           | 2             |
| 63402970 | 2000_Fruit | Fruit salad, excluding citrus fruits, with nondairy whipped topping                                          | 85                 | 4                  | A           | 2             |
| 63115010 | 2000_Fruit | Cherries, sweet, raw                                                                                         | 85                 | 4.5                | A           | 1             |
| 63203120 | 2000_Fruit | Blueberries, cooked or canned, unsweetened, water pack                                                       | 84                 | 4.5                | A           | 1             |
| 62108100 | 2000_Fruit | Currants, dried                                                                                              | 84                 | 3.5                | C           | 1             |
| 62107100 | 2000_Fruit | Banana flakes, dehydrated                                                                                    | 84                 | 4                  | B           | 1             |
| 63139010 | 2000_Fruit | Persimmon, raw                                                                                               | 84                 | 4.5                | A           | 1             |
| 63402990 | 2000_Fruit | Fruit salad, including citrus fruits, with pudding                                                           | 83                 | 4.5                | A           | 1             |
| 63126510 | 2000_Fruit | Lychée, raw                                                                                                  | 83                 | 4                  | B           | 1             |
| 63123000 | 2000_Fruit | Grapes, raw, NS as to type                                                                                   | 83                 | 4                  | B           | 1             |
| 63123010 | 2000_Fruit | Grapes, European type, adherent skin, raw                                                                    | 83                 | 4                  | B           | 1             |
| 63403020 | 2000_Fruit | Fruit salad, including citrus fruit, with whipped cream                                                      | 83                 | 4                  | B           | 2             |
| 63126700 | 2000_Fruit | Longans, raw                                                                                                 | 83                 | 4                  | B           | 1             |
| 62113100 | 2000_Fruit | Fig, dried, uncooked                                                                                         | 83                 | 4                  | C           | 1             |
| 63137010 | 2000_Fruit | Pear, raw                                                                                                    | 82                 | 4.5                | A           | 1             |
| 62101050 | 2000_Fruit | Fruit mixture, dried                                                                                         | 82                 | 4                  | B           | 3             |
| 62101100 | 2000_Fruit | Apple, dried, uncooked                                                                                       | 82                 | 3.5                | C           | 1             |
| 62101220 | 2000_Fruit | Apple, dried, cooked, unsweetened                                                                            | 81                 | 4.5                | A           | 1             |
| 61101200 | 2000_Fruit | Grapefruit, canned or frozen, NS as to sweetened or unsweetened; sweetened, NS as to type of sweetener       | 81                 | 4.5                | A           | 3             |
| 63403000 | 2000_Fruit | Fruit salad, excluding citrus fruits, with pudding                                                           | 81                 | 4.5                | A           | 1             |
| 62122100 | 2000_Fruit | Prune, dried, uncooked                                                                                       | 81                 | 4                  | B           | 1             |

| foodcode | level1nd   | Description                                                                                                 | Food Compass Score | Health Star Rating | Nutri-Score | NOVA Category |
|----------|------------|-------------------------------------------------------------------------------------------------------------|--------------------|--------------------|-------------|---------------|
| 62101300 | 2000_Fruit | Apple chips                                                                                                 | 81                 | 3                  | D           | 3             |
| 63103170 | 2000_Fruit | Apricot, cooked or canned, juice pack                                                                       | 81                 | 4.5                | A           | 3             |
| 63403010 | 2000_Fruit | Fruit salad, including citrus fruits, with salad dressing or mayonnaise                                     | 81                 | 4                  | C           | 2             |
| 63129030 | 2000_Fruit | Mango, cooked                                                                                               | 81                 | 4                  | B           | 1             |
| 63402960 | 2000_Fruit | Fruit salad, excluding citrus fruits, with whipped cream                                                    | 80                 | 4                  | B           | 2             |
| 61101220 | 2000_Fruit | Grapefruit, canned or frozen, unsweetened, water pack                                                       | 80                 | 4.5                | B           | 1             |
| 63401010 | 2000_Fruit | Apple salad with dressing                                                                                   | 80                 | 4                  | B           | 2             |
| 63320100 | 2000_Fruit | Fruit salad, Puerto Rican style                                                                             | 80                 | 4.5                | A           | 1             |
| 62113220 | 2000_Fruit | Fig, dried, cooked, unsweetened                                                                             | 80                 | 4                  | B           | 1             |
| 63107010 | 2000_Fruit | Banana, raw                                                                                                 | 79                 | 4.5                | A           | 1             |
| 63107050 | 2000_Fruit | Banana, white, Guineo blanco maduro                                                                         | 79                 | 4.5                | A           | 1             |
| 63107070 | 2000_Fruit | Banana, Chinese, raw                                                                                        | 79                 | 4.5                | A           | 1             |
| 63107080 | 2000_Fruit | Banana, red, Guineo morado                                                                                  | 79                 | 4.5                | A           | 1             |
| 63137120 | 2000_Fruit | Pear, cooked or canned, unsweetened, water pack                                                             | 79                 | 4.5                | A           | 1             |
| 62122220 | 2000_Fruit | Prune, dried, cooked, unsweetened                                                                           | 79                 | 4                  | B           | 1             |
| 63402950 | 2000_Fruit | Fruit salad, excluding citrus fruits, with salad dressing or mayonnaise                                     | 78                 | 4                  | C           | 2             |
| 63115120 | 2000_Fruit | Cherries, sweet, cooked, unsweetened, water pack                                                            | 78                 | 4.5                | B           | 1             |
| 63107310 | 2000_Fruit | Banana, ripe, boiled                                                                                        | 77                 | 4.5                | A           | 1             |
| 63135170 | 2000_Fruit | Peach, cooked or canned, juice pack                                                                         | 77                 | 4.5                | B           | 3             |
| 62119100 | 2000_Fruit | Pear, dried, uncooked                                                                                       | 76                 | 3.5                | C           | 1             |
| 63115170 | 2000_Fruit | Cherries, sweet, cooked or canned, juice pack                                                               | 76                 | 4.5                | A           | 3             |
| 63123120 | 2000_Fruit | Grapes, seedless, cooked or canned, unsweetened, water pack                                                 | 76                 | 4                  | B           | 1             |
| 63145010 | 2000_Fruit | Pomegranate, raw                                                                                            | 75                 | 4.5                | A           | 1             |
| 62119220 | 2000_Fruit | Pear, dried, cooked, unsweetened                                                                            | 75                 | 4.5                | B           | 1             |
| 62114110 | 2000_Fruit | Papaya, dried                                                                                               | 75                 | 3                  | C           | 1             |
| 63141150 | 2000_Fruit | Pineapple, cooked or canned, drained solids                                                                 | 75                 | 4                  | B           | 3             |
| 62120100 | 2000_Fruit | Pineapple, dried                                                                                            | 74                 | 3                  | C           | 1             |
| 63143120 | 2000_Fruit | Plum, cooked or canned, unsweetened, water pack                                                             | 74                 | 4                  | B           | 1             |
| 63402045 | 2000_Fruit | Fried dwarf banana, Puerto Rican style                                                                      | 74                 | 4                  | B           | 2             |
| 63119120 | 2000_Fruit | Fig, cooked or canned, unsweetened, water pack                                                              | 74                 | 4.5                | A           | 1             |
| 63403040 | 2000_Fruit | Fruit salad, including citrus fruits, with marshmallows                                                     | 74                 | 4                  | C           | 3             |
| 63119010 | 2000_Fruit | Fig, raw                                                                                                    | 73                 | 4.5                | A           | 1             |
| 63107210 | 2000_Fruit | Banana, ripe, fried                                                                                         | 73                 | 4                  | B           | 2             |
| 62105000 | 2000_Fruit | Blueberries, dried                                                                                          | 73                 | 3.5                | B           | 3             |
| 62110100 | 2000_Fruit | Date                                                                                                        | 72                 | 3.5                | C           | 1             |
| 63101120 | 2000_Fruit | Applesauce, stewed apples, unsweetened                                                                      | 72                 | 4.5                | B           | 3             |
| 63402980 | 2000_Fruit | Fruit salad, excluding citrus fruits, with marshmallows                                                     | 72                 | 4                  | C           | 3             |
| 63201800 | 2000_Fruit | Blackberries, frozen, sweetened, NS as to type of sweetener                                                 | 72                 | 4.5                | B           | 3             |
| 63311120 | 2000_Fruit | Fruit cocktail, cooked or canned, unsweetened, water pack                                                   | 71                 | 4.5                | A           | 4             |
| 63413010 | 2000_Fruit | Pineapple salad with dressing                                                                               | 69                 | 4                  | B           | 4             |
| 63301010 | 2000_Fruit | Ambrosia                                                                                                    | 69                 | 4.5                | A           | 1             |
| 62125100 | 2000_Fruit | Raisins                                                                                                     | 68                 | 3                  | C           | 1             |
| 63143170 | 2000_Fruit | Plum, cooked or canned, juice pack                                                                          | 68                 | 4                  | B           | 3             |
| 63137170 | 2000_Fruit | Pear, cooked or canned, juice pack                                                                          | 68                 | 4.5                | A           | 3             |
| 63141110 | 2000_Fruit | Pineapple, cooked or canned, NS as to sweetened or unsweetened; sweetened, NS as to type of sweetener       | 68                 | 4                  | B           | 3             |
| 63141170 | 2000_Fruit | Pineapple, cooked or canned, juice pack                                                                     | 68                 | 4                  | B           | 3             |
| 62116200 | 2000_Fruit | Peach, dried, cooked, NS as to sweetened or unsweetened; sweetened, NS as to type of sweetener              | 66                 | 4                  | B           | 1             |
| 63115150 | 2000_Fruit | Cherries, sweet, cooked or canned, drained solids                                                           | 65                 | 4                  | B           | 3             |
| 63115110 | 2000_Fruit | Cherries, sweet, cooked or canned, NS as to sweetened or unsweetened; sweetened, NS as to type of sweetener | 65                 | 4.5                | B           | 3             |
| 63109750 | 2000_Fruit | Starfruit, cooked, with sugar                                                                               | 64                 | 4.5                | A           | 3             |
| 63148750 | 2000_Fruit | Tamarind, raw                                                                                               | 64                 | 4                  | C           | 1             |
| 62104200 | 2000_Fruit | Apricot, dried, cooked, NS as to sweetened or unsweetened; sweetened, NS as to type of sweetener            | 64                 | 4                  | C           | 1             |
| 63219600 | 2000_Fruit | Raspberries, frozen, NS as to added sweetener                                                               | 64                 | 4                  | B           | 3             |
| 63219620 | 2000_Fruit | Raspberries, frozen, with sugar                                                                             | 64                 | 4                  | B           | 3             |
| 63311170 | 2000_Fruit | Fruit cocktail, cooked or canned, juice pack                                                                | 63                 | 4.5                | B           | 4             |
| 62116230 | 2000_Fruit | Peach, dried, cooked, with sugar                                                                            | 63                 | 4                  | B           | 2             |
| 63203550 | 2000_Fruit | Blueberries, frozen, sweetened                                                                              | 62                 | 4                  | B           | 3             |
| 62113200 | 2000_Fruit | Fig, dried, cooked, NS as to sweetened or unsweetened; sweetened, NS as to type of sweetener                | 62                 | 4                  | B           | 1             |
| 63107110 | 2000_Fruit | Banana, baked                                                                                               | 62                 | 4                  | B           | 2             |
| 63101140 | 2000_Fruit | Applesauce, stewed apples, sweetened with low calorie sweetener                                             | 62                 | 4.5                | B           | 4             |
| 63203110 | 2000_Fruit | Blueberries, cooked or canned, NS as to sweetened or unsweetened; sweetened, NS as to type of sweetener     | 62                 | 4                  | B           | 3             |
| 63203125 | 2000_Fruit | Blueberries, cooked or canned, in light syrup                                                               | 62                 | 4                  | B           | 3             |
| 61110230 | 2000_Fruit | Kumquat, cooked or canned, in syrup                                                                         | 61                 | 4.5                | B           | 3             |
| 63115140 | 2000_Fruit | Cherries, sweet, cooked or canned, in light syrup                                                           | 61                 | 4                  | B           | 3             |
| 63103150 | 2000_Fruit | Apricot, cooked or canned, drained solids                                                                   | 61                 | 4                  | B           | 3             |
| 62104230 | 2000_Fruit | Apricot, dried, cooked, with sugar                                                                          | 61                 | 4                  | C           | 2             |
| 63107090 | 2000_Fruit | Banana, red, fried                                                                                          | 61                 | 4                  | B           | 4             |
| 61104200 | 2000_Fruit | Grapefruit and orange sections, cooked, canned, or frozen, NS as to added sweetener                         | 61                 | 4                  | B           | 3             |
| 61104230 | 2000_Fruit | Grapefruit and orange sections, cooked, canned, or frozen, in light syrup                                   | 61                 | 4                  | B           | 3             |
| 63141140 | 2000_Fruit | Pineapple, cooked or canned, in light syrup                                                                 | 61                 | 4                  | B           | 3             |
| 63201110 | 2000_Fruit | Blackberries, cooked or canned, NS as to sweetened or unsweetened; sweetened, NS as to type of sweetener    | 60                 | 4                  | B           | 3             |
| 63201130 | 2000_Fruit | Blackberries, cooked or canned, in heavy syrup                                                              | 60                 | 4                  | B           | 3             |
| 62122200 | 2000_Fruit | Prune, dried, cooked, NS as to sweetened or unsweetened; sweetened, NS as to type of sweetener              | 60                 | 3.5                | C           | 1             |
| 62126000 | 2000_Fruit | Tamarind pulp, dried, sweetened                                                                             | 60                 | 3.5                | C           | 3             |
| 62109100 | 2000_Fruit | Cranberries, dried                                                                                          | 60                 | 2.5                | C           | 3             |
| 63411010 | 2000_Fruit | Cranberry salad, congealed                                                                                  | 60                 | 4                  | B           | 4             |
| 63147140 | 2000_Fruit | Rhubarb, cooked or canned, in light syrup                                                                   | 59                 | 4.5                | B           | 3             |
| 63125100 | 2000_Fruit | Guava shell, canned in heavy syrup                                                                          | 59                 | 4.5                | A           | 3             |
| 62101000 | 2000_Fruit | Fruit, dried, NFS, uncooked                                                                                 | 59                 | 2.5                | C           | 1             |
| 62119200 | 2000_Fruit | Pear, dried, cooked, NS as to sweetened or unsweetened; sweetened, NS as to type of sweetener               | 59                 | 4                  | C           | 2             |
| 62113230 | 2000_Fruit | Fig, dried, cooked, with sugar                                                                              | 58                 | 4                  | C           | 3             |
| 62122230 | 2000_Fruit | Prune, dried, cooked, with sugar                                                                            | 58                 | 3.5                | C           | 2             |
| 63101310 | 2000_Fruit | Apple, baked, NS as to added sweetener                                                                      | 58                 | 4                  | B           | 2             |
| 63101330 | 2000_Fruit | Apple, baked, with sugar                                                                                    | 58                 | 4                  | B           | 2             |
| 63111110 | 2000_Fruit | Nectarine, cooked                                                                                           | 57                 | 4                  | B           | 2             |
| 62119230 | 2000_Fruit | Pear, dried, cooked, with sugar                                                                             | 57                 | 4                  | C           | 2             |
| 63101210 | 2000_Fruit | Apple, cooked or canned, with syrup                                                                         | 57                 | 4.5                | B           | 3             |
| 61122330 | 2000_Fruit | Orange, mandarin, canned or frozen, in light syrup                                                          | 57                 | 4                  | C           | 3             |
| 63135150 | 2000_Fruit | Peach, cooked or canned, drained solids                                                                     | 57                 | 4                  | B           | 3             |
| 63115130 | 2000_Fruit | Cherries, sweet, cooked or canned, in heavy syrup                                                           | 55                 | 4                  | C           | 3             |
| 63135610 | 2000_Fruit | Peach, frozen, NS as to added sweetener                                                                     | 55                 | 4                  | C           | 3             |
| 63135630 | 2000_Fruit | Peach, frozen, with sugar                                                                                   | 55                 | 4                  | C           | 3             |
| 63103140 | 2000_Fruit | Apricot, cooked or canned, in light syrup                                                                   | 55                 | 4                  | B           | 3             |
| 63219110 | 2000_Fruit | Raspberries, cooked or canned, NS as to sweetened or unsweetened; sweetened, NS as to type of sweetener     | 55                 | 4                  | B           | 3             |
| 63219130 | 2000_Fruit | Raspberries, cooked or canned, in heavy syrup                                                               | 55                 | 4                  | B           | 3             |
| 63223600 | 2000_Fruit | Strawberries, frozen, NS as to added sweetener                                                              | 55                 | 4                  | C           | 3             |
| 63223620 | 2000_Fruit | Strawberries, frozen, with sugar                                                                            | 55                 | 4                  | C           | 3             |
| 63119140 | 2000_Fruit | Figs, cooked or canned, in light syrup                                                                      | 55                 | 4                  | B           | 3             |
| 63137150 | 2000_Fruit | Pear, cooked or canned, drained solids                                                                      | 54                 | 4.5                | A           | 3             |
| 63135110 | 2000_Fruit | Peach, cooked or canned, NS as to sweetened or unsweetened; sweetened, NS as to type of sweetener           | 54                 | 4                  | B           | 3             |
| 63135140 | 2000_Fruit | Peach, cooked or canned, in light or medium syrup                                                           | 54                 | 4                  | B           | 3             |
| 62101200 | 2000_Fruit | Apple, dried, cooked, NS as to sweetened or unsweetened; sweetened, NS as to type of sweetener              | 53                 | 4                  | B           | 1             |

| foodcode | level1nd   | Description                                                                                                  | Food Compass Score | Health Star Rating | Nutri-Score | NOVA Category |
|----------|------------|--------------------------------------------------------------------------------------------------------------|--------------------|--------------------|-------------|---------------|
| 61101230 | 2000_Fruit | Grapefruit, canned or frozen, in light syrup                                                                 | 53                 | 4                  | C           | 3             |
| 63223110 | 2000_Fruit | Strawberries, cooked or canned, NS as to sweetened or unsweetened; sweetened, NS as to type of sweetener     | 53                 | 4                  | C           | 3             |
| 63223130 | 2000_Fruit | Strawberries, cooked or canned, in syrup                                                                     | 53                 | 4                  | C           | 3             |
| 63133100 | 2000_Fruit | Papaya, cooked or canned, in sugar or syrup                                                                  | 52                 | 4                  | C           | 3             |
| 62121100 | 2000_Fruit | Plum, rock salt, dried                                                                                       | 51                 | 0.5                | E           | 3             |
| 63203130 | 2000_Fruit | Blueberries, cooked or canned, in heavy syrup                                                                | 51                 | 4                  | C           | 3             |
| 63101110 | 2000_Fruit | Applesauce, stewed apples, NS as to sweetened or unsweetened; sweetened, NS as to type of sweetener          | 51                 | 4                  | B           | 3             |
| 63101130 | 2000_Fruit | Applesauce, stewed apples, with sugar                                                                        | 51                 | 4                  | B           | 3             |
| 62114050 | 2000_Fruit | Mango, dried                                                                                                 | 51                 | 2.5                | D           | 3             |
| 62101230 | 2000_Fruit | Apple, dried, cooked, with sugar                                                                             | 50                 | 4                  | C           | 2             |
| 63119110 | 2000_Fruit | Fig, cooked or canned, NS as to sweetened or unsweetened; sweetened, NS as to type of sweetener              | 49                 | 4                  | B           | 3             |
| 63119130 | 2000_Fruit | Fig, cooked or canned, in heavy syrup                                                                        | 49                 | 4                  | B           | 3             |
| 62106000 | 2000_Fruit | Cherries, dried                                                                                              | 49                 | 2.5                | D           | 3             |
| 63126600 | 2000_Fruit | Lychee, cooked or canned, in sugar or syrup                                                                  | 49                 | 4                  | C           | 3             |
| 63137110 | 2000_Fruit | Pear, cooked or canned, NS as to sweetened or unsweetened; sweetened, NS as to type of sweetener             | 48                 | 4.5                | B           | 3             |
| 63137140 | 2000_Fruit | Pear, cooked or canned, in light syrup                                                                       | 48                 | 4.5                | B           | 3             |
| 63402050 | 2000_Fruit | Fried dwarf banana with cheese, Puerto Rican style                                                           | 48                 | 4                  | B           | 4             |
| 63103110 | 2000_Fruit | Apricot, cooked or canned, NS as to sweetened or unsweetened; sweetened, NS as to type of sweetener          | 48                 | 4                  | C           | 3             |
| 63103130 | 2000_Fruit | Apricot, cooked or canned, in heavy syrup                                                                    | 48                 | 4                  | C           | 3             |
| 63135660 | 2000_Fruit | Peach, spiced                                                                                                | 48                 | 4                  | C           | 3             |
| 63141130 | 2000_Fruit | Pineapple, cooked or canned, in heavy syrup                                                                  | 48                 | 4                  | B           | 3             |
| 62125110 | 2000_Fruit | Raisins, cooked                                                                                              | 47                 | 3                  | D           | 2             |
| 63311150 | 2000_Fruit | Fruit cocktail, cooked or canned, drained solids                                                             | 47                 | 4                  | B           | 4             |
| 63147600 | 2000_Fruit | Rhubarb, frozen, NS as to sweetened or unsweetened; sweetened, NS as to type of sweetener                    | 46                 | 4                  | C           | 3             |
| 63135130 | 2000_Fruit | Peach, cooked or canned, in heavy syrup                                                                      | 46                 | 4                  | C           | 3             |
| 63147620 | 2000_Fruit | Rhubarb, frozen, with sugar                                                                                  | 46                 | 4                  | C           | 3             |
| 63147150 | 2000_Fruit | Rhubarb, cooked or canned, drained solids                                                                    | 46                 | 4                  | C           | 3             |
| 63123110 | 2000_Fruit | Grapes, seedless, cooked or canned, NS as to sweetened or unsweetened; sweetened, NS as to type of sweetener | 45                 | 4                  | C           | 3             |
| 63123130 | 2000_Fruit | Grapes, seedless, cooked or canned, in heavy syrup                                                           | 45                 | 4                  | C           | 3             |
| 63137130 | 2000_Fruit | Pear, cooked or canned, in heavy syrup                                                                       | 44                 | 4                  | B           | 3             |
| 63129020 | 2000_Fruit | Mango, pickled                                                                                               | 44                 | 3.5                | C           | 3             |
| 63143150 | 2000_Fruit | Plum, cooked or canned, drained solids                                                                       | 44                 | 4                  | C           | 3             |
| 63143140 | 2000_Fruit | Plum, cooked or canned, in light syrup                                                                       | 43                 | 4                  | B           | 3             |
| 63147110 | 2000_Fruit | Rhubarb, cooked or canned, NS as to sweetened or unsweetened; sweetened, NS as to type of sweetener          | 43                 | 3.5                | C           | 3             |
| 63147130 | 2000_Fruit | Rhubarb, cooked or canned, in heavy syrup                                                                    | 43                 | 3.5                | C           | 3             |
| 63311140 | 2000_Fruit | Fruit cocktail, cooked or canned, in light syrup                                                             | 42                 | 4                  | B           | 4             |
| 63401990 | 2000_Fruit | Banana, chocolate-covered with nuts                                                                          | 42                 | 3.5                | C           | 3             |
| 63311110 | 2000_Fruit | Fruit cocktail, cooked or canned, NS as to sweetened or unsweetened; sweetened, NS as to type of sweetener   | 42                 | 4                  | B           | 4             |
| 63101420 | 2000_Fruit | Apple, pickled                                                                                               | 42                 | 3.5                | C           | 3             |
| 63101150 | 2000_Fruit | Applesauce with other fruits                                                                                 | 41                 | 4                  | B           | 4             |
| 63107410 | 2000_Fruit | Banana, batter-dipped, fried                                                                                 | 41                 | 3.5                | B           | 2             |
| 63307010 | 2000_Fruit | Cranberry-orange relish, uncooked                                                                            | 41                 | 4                  | C           | 4             |
| 63135650 | 2000_Fruit | Peach, pickled                                                                                               | 40                 | 4                  | C           | 3             |
| 63311145 | 2000_Fruit | Tropical fruit cocktail, cooked or canned, in light syrup                                                    | 40                 | 4                  | B           | 4             |
| 63143650 | 2000_Fruit | Plum, pickled                                                                                                | 40                 | 3.5                | C           | 3             |
| 63401070 | 2000_Fruit | Fruit, chocolate covered                                                                                     | 39                 | 4                  | C           | 4             |
| 63101410 | 2000_Fruit | Apple rings, fried                                                                                           | 38                 | 4                  | B           | 4             |
| 62107200 | 2000_Fruit | Banana chips                                                                                                 | 37                 | 1.5                | E           | 4             |
| 63311130 | 2000_Fruit | Fruit cocktail, cooked or canned, in heavy syrup                                                             | 36                 | 4                  | B           | 4             |
| 63143110 | 2000_Fruit | Plum, cooked or canned, NS as to sweetened or unsweetened; sweetened, NS as to type of sweetener             | 36                 | 4                  | C           | 3             |
| 63143130 | 2000_Fruit | Plum, cooked or canned, in heavy syrup                                                                       | 36                 | 4                  | C           | 3             |
| 63307100 | 2000_Fruit | Cranberry-raspberry Sauce                                                                                    | 28                 | 3.5                | C           | 4             |
| 63101500 | 2000_Fruit | Apple, fried                                                                                                 | 28                 | 4                  | C           | 3             |
| 63402010 | 2000_Fruit | Banana whip                                                                                                  | 27                 | 3.5                | C           | 4             |
| 63401060 | 2000_Fruit | Apple, candied                                                                                               | 26                 | 4                  | C           | 4             |
| 63403100 | 2000_Fruit | Fruit dessert with cream and/or pudding and nuts                                                             | 26                 | 3                  | D           | 3             |
| 63402030 | 2000_Fruit | Prune whip                                                                                                   | 25                 | 3.5                | C           | 4             |
| 63111010 | 2000_Fruit | Cherries, maraschino                                                                                         | 24                 | 3.5                | C           | 4             |
| 63207000 | 2000_Fruit | Cranberries, NS as to raw, cooked, or canned                                                                 | 23                 | 3.5                | C           | 4             |
| 63207110 | 2000_Fruit | Cranberries, cooked or canned                                                                                | 23                 | 3.5                | C           | 4             |

| foodcode | level1nd        | Description                                                     | Food Compass Score | Health Star Rating | Nutri-Score | NOVA Category |
|----------|-----------------|-----------------------------------------------------------------|--------------------|--------------------|-------------|---------------|
| 72101100 | 3000_Vegetables | Beet greens, raw                                                | 100                | 4.5                | A           | 1             |
| 72101200 | 3000_Vegetables | Beet greens, cooked, NS as to fat added in cooking              | 100                | 4                  | B           | 3             |
| 72101210 | 3000_Vegetables | Beet greens, cooked, fat not added in cooking                   | 100                | 4.5                | A           | 1             |
| 72101220 | 3000_Vegetables | Beet greens, cooked, fat added in cooking, NS as to type of fat | 100                | 4                  | B           | 3             |
| 72101230 | 3000_Vegetables | Beet greens, cooked, made with oil                              | 100                | 4                  | B           | 2             |
| 72101250 | 3000_Vegetables | Beet greens, cooked, made with margarine                        | 100                | 4                  | B           | 4             |
| 72103000 | 3000_Vegetables | Broccoli raab, raw                                              | 100                | 5                  | A           | 1             |
| 72103020 | 3000_Vegetables | Broccoli raab, cooked, fat not added in cooking                 | 100                | 4.5                | A           | 1             |
| 72103040 | 3000_Vegetables | Broccoli raab, cooked, made with oil                            | 100                | 4.5                | A           | 2             |
| 72103060 | 3000_Vegetables | Broccoli raab, cooked, made with margarine                      | 100                | 4.5                | A           | 4             |
| 72104100 | 3000_Vegetables | Chard, raw                                                      | 100                | 4.5                | A           | 1             |
| 72104200 | 3000_Vegetables | Chard, cooked, NS as to fat added in cooking                    | 100                | 4.5                | B           | 3             |
| 72104210 | 3000_Vegetables | Chard, cooked, fat not added in cooking                         | 100                | 4.5                | A           | 1             |
| 72104220 | 3000_Vegetables | Chard, cooked, fat added in cooking, NS as to type of fat       | 100                | 4.5                | B           | 3             |
| 72104230 | 3000_Vegetables | Chard, cooked, made with oil                                    | 100                | 4.5                | B           | 2             |
| 72104250 | 3000_Vegetables | Chard, cooked, made with margarine                              | 100                | 4.5                | A           | 4             |
| 72107100 | 3000_Vegetables | Collards, raw                                                   | 100                | 5                  | A           | 1             |
| 72107210 | 3000_Vegetables | Collards, cooked, NS as to form, fat not added in cooking       | 100                | 5                  | A           | 1             |
| 72107211 | 3000_Vegetables | Collards, cooked, from fresh, fat not added in cooking          | 100                | 5                  | A           | 1             |
| 72107212 | 3000_Vegetables | Collards, cooked, from frozen, fat not added in cooking         | 100                | 4.5                | A           | 1             |
| 72107213 | 3000_Vegetables | Collards, cooked, from canned, fat not added in cooking         | 100                | 4.5                | A           | 1             |
| 72107224 | 3000_Vegetables | Collards, cooked, NS as to form, made with oil                  | 100                | 5                  | A           | 1             |
| 72107226 | 3000_Vegetables | Collards, cooked, NS as to form, made with margarine            | 100                | 5                  | A           | 4             |
| 72107227 | 3000_Vegetables | Collards, cooked, from fresh, made with oil                     | 100                | 5                  | A           | 2             |
| 72107229 | 3000_Vegetables | Collards, cooked, from fresh, made with margarine               | 100                | 5                  | A           | 4             |
| 72107230 | 3000_Vegetables | Collards, cooked, from frozen, made with oil                    | 100                | 4.5                | A           | 2             |
| 72107233 | 3000_Vegetables | Collards, cooked, from canned, made with oil                    | 100                | 4.5                | A           | 2             |
| 72110100 | 3000_Vegetables | Cress, raw                                                      | 100                | 4.5                | A           | 1             |
| 72110210 | 3000_Vegetables | Cress, cooked, NS as to form, fat not added in cooking          | 100                | 4                  | A           | 1             |
| 72110211 | 3000_Vegetables | Cress, cooked, from fresh, fat not added in cooking             | 100                | 4                  | A           | 1             |
| 72110213 | 3000_Vegetables | Cress, cooked, from canned, fat not added in cooking            | 100                | 4                  | A           | 1             |
| 72110230 | 3000_Vegetables | Cress, cooked, NS as to form, made with oil                     | 100                | 4                  | B           | 2             |
| 72110232 | 3000_Vegetables | Cress, cooked, NS as to form, made with margarine               | 100                | 4                  | B           | 4             |
| 72110233 | 3000_Vegetables | Cress, cooked, from fresh, made with oil                        | 100                | 4                  | B           | 2             |
| 72110235 | 3000_Vegetables | Cress, cooked, from fresh, made with margarine                  | 100                | 4                  | B           | 4             |
| 72110236 | 3000_Vegetables | Cress, cooked, from canned, made with oil                       | 100                | 4                  | B           | 2             |
| 72110238 | 3000_Vegetables | Cress, cooked, from canned, made with margarine                 | 100                | 4                  | B           | 4             |
| 72113100 | 3000_Vegetables | Dandelion greens, raw                                           | 100                | 5                  | A           | 1             |
| 72113210 | 3000_Vegetables | Dandelion greens, cooked, fat not added in cooking              | 100                | 4.5                | A           | 1             |
| 72113230 | 3000_Vegetables | Dandelion greens, cooked, made with oil                         | 100                | 4.5                | A           | 2             |
| 72116000 | 3000_Vegetables | Romaine lettuce, raw                                            | 100                | 5                  | A           | 1             |
| 72116200 | 3000_Vegetables | Escarole, cooked, NS as to fat added in cooking                 | 100                | 4.5                | A           | 2             |
| 72116210 | 3000_Vegetables | Escarole, cooked, fat not added in cooking                      | 100                | 4.5                | A           | 1             |
| 72116220 | 3000_Vegetables | Escarole, cooked, fat added in cooking, NS as to type of fat    | 100                | 4.5                | A           | 2             |
| 72116221 | 3000_Vegetables | Escarole, cooked, made with oil                                 | 100                | 4.5                | A           | 2             |
| 72116223 | 3000_Vegetables | Escarole, cooked, made with margarine                           | 100                | 4.5                | A           | 4             |
| 72118210 | 3000_Vegetables | Greens, cooked, NS as to form, fat not added in cooking         | 100                | 4.5                | A           | 1             |
| 72118211 | 3000_Vegetables | Greens, cooked, from fresh, fat not added in cooking            | 100                | 4.5                | A           | 1             |
| 72118212 | 3000_Vegetables | Greens, cooked, from frozen, fat not added in cooking           | 100                | 4.5                | A           | 1             |
| 72118213 | 3000_Vegetables | Greens, cooked, from canned, fat not added in cooking           | 100                | 4.5                | A           | 1             |
| 72118224 | 3000_Vegetables | Greens, cooked, NS as to form, made with oil                    | 100                | 4.5                | A           | 2             |
| 72118226 | 3000_Vegetables | Greens, cooked, NS as to form, made with margarine              | 100                | 4.5                | A           | 4             |
| 72118227 | 3000_Vegetables | Greens, cooked, from fresh, made with oil                       | 100                | 4.5                | A           | 2             |
| 72118229 | 3000_Vegetables | Greens, cooked, from fresh, made with margarine                 | 100                | 4.5                | A           | 4             |
| 72118230 | 3000_Vegetables | Greens, cooked, from frozen, made with oil                      | 100                | 4.5                | A           | 2             |
| 72118232 | 3000_Vegetables | Greens, cooked, from frozen, made with margarine                | 100                | 4.5                | A           | 4             |
| 72118233 | 3000_Vegetables | Greens, cooked, from canned, made with oil                      | 100                | 4.5                | A           | 2             |
| 72118235 | 3000_Vegetables | Greens, cooked, from canned, made with margarine                | 100                | 4.5                | A           | 4             |
| 72118300 | 3000_Vegetables | Chamnamul, cooked, NS as to fat added in cooking                | 100                | 4                  | B           | 2             |
| 72118305 | 3000_Vegetables | Chamnamul, cooked, fat not added in cooking                     | 100                | 4                  | A           | 1             |
| 72118310 | 3000_Vegetables | Chamnamul, cooked, fat added in cooking                         | 100                | 4                  | B           | 2             |
| 72119190 | 3000_Vegetables | Kale, raw                                                       | 100                | 5                  | A           | 1             |
| 72119210 | 3000_Vegetables | Kale, cooked, NS as to form, fat not added in cooking           | 100                | 4.5                | A           | 1             |
| 72119211 | 3000_Vegetables | Kale, cooked, from fresh, fat not added in cooking              | 100                | 4.5                | A           | 1             |
| 72119212 | 3000_Vegetables | Kale, cooked, from frozen, fat not added in cooking             | 100                | 4.5                | A           | 1             |
| 72119213 | 3000_Vegetables | Kale, cooked, from canned, fat not added in cooking             | 100                | 4.5                | A           | 1             |
| 72119224 | 3000_Vegetables | Kale, cooked, NS as to form, made with oil                      | 100                | 4.5                | A           | 2             |
| 72119227 | 3000_Vegetables | Kale, cooked, from fresh, made with oil                         | 100                | 4.5                | A           | 2             |
| 72119230 | 3000_Vegetables | Kale, cooked, from frozen, made with oil                        | 100                | 4.5                | B           | 2             |
| 72119233 | 3000_Vegetables | Kale, cooked, from canned, made with oil                        | 100                | 4.5                | B           | 2             |
| 72120210 | 3000_Vegetables | Lambsquarter, cooked, fat not added in cooking                  | 100                | 4.5                | A           | 1             |
| 72120230 | 3000_Vegetables | Lambsquarter, cooked, made with oil                             | 100                | 4.5                | A           | 2             |
| 72121209 | 3000_Vegetables | Mustard Cabbage, cooked, NS as to fat added in cooking          | 100                | 4                  | B           | 3             |
| 72121210 | 3000_Vegetables | Mustard cabbage, cooked, fat not added in cooking               | 100                | 4.5                | A           | 1             |
| 72121211 | 3000_Vegetables | Mustard Cabbage, cooked, fat added in cooking                   | 100                | 4                  | B           | 3             |
| 72122100 | 3000_Vegetables | Mustard greens, raw                                             | 100                | 5                  | A           | 1             |
| 72122210 | 3000_Vegetables | Mustard greens, cooked, NS as to form, fat not added in cooking | 100                | 4.5                | A           | 1             |
| 72122211 | 3000_Vegetables | Mustard greens, cooked, from fresh, fat not added in cooking    | 100                | 4.5                | A           | 1             |
| 72122212 | 3000_Vegetables | Mustard greens, cooked, from frozen, fat not added in cooking   | 100                | 4.5                | A           | 1             |
| 72122213 | 3000_Vegetables | Mustard greens, cooked, from canned, fat not added in cooking   | 100                | 4.5                | A           | 1             |
| 72122224 | 3000_Vegetables | Mustard greens, cooked, NS as to form, made with oil            | 100                | 4.5                | A           | 2             |
| 72122226 | 3000_Vegetables | Mustard greens, cooked, NS as to form, made with margarine      | 100                | 4.5                | A           | 4             |
| 72122227 | 3000_Vegetables | Mustard greens, cooked, from fresh, made with oil               | 100                | 4.5                | A           | 2             |
| 72122229 | 3000_Vegetables | Mustard greens, cooked, from fresh, made with margarine         | 100                | 4.5                | A           | 4             |
| 72122230 | 3000_Vegetables | Mustard greens, cooked, from frozen, made with oil              | 100                | 4.5                | A           | 2             |
| 72122232 | 3000_Vegetables | Mustard greens, cooked, from frozen, made with margarine        | 100                | 4.5                | A           | 4             |
| 72122233 | 3000_Vegetables | Mustard greens, cooked, from frozen, made with oil              | 100                | 4.5                | A           | 2             |
| 72122235 | 3000_Vegetables | Mustard greens, cooked, from canned, made with oil              | 100                | 4.5                | B           | 4             |
| 72123010 | 3000_Vegetables | Poke greens, cooked, fat not added in cooking                   | 100                | 4.5                | A           | 1             |
| 72123030 | 3000_Vegetables | Poke greens, cooked, made with oil                              | 100                | 4.5                | A           | 2             |
| 72123050 | 3000_Vegetables | Poke greens, cooked, made with margarine                        | 100                | 4.5                | A           | 4             |
| 72124100 | 3000_Vegetables | Radicchio, raw                                                  | 100                | 4.5                | A           | 1             |
| 72125100 | 3000_Vegetables | Spinach, raw                                                    | 100                | 5                  | A           | 1             |
| 72125200 | 3000_Vegetables | Spinach, cooked, NS as to form, NS as to fat added in cooking   | 100                | 4.5                | A           | 3             |
| 72125201 | 3000_Vegetables | Spinach, cooked, from fresh, NS as to fat added in cooking      | 100                | 4.5                | A           | 3             |
| 72125202 | 3000_Vegetables | Spinach, cooked, from frozen, NS as to fat added in cooking     | 100                | 4.5                | A           | 3             |
| 72125203 | 3000_Vegetables | Spinach, cooked, from canned, NS as to fat added in cooking     | 100                | 4.5                | A           | 3             |
| 72125210 | 3000_Vegetables | Spinach, cooked, NS as to form, fat not added in cooking        | 100                | 4.5                | A           | 1             |
| 72125211 | 3000_Vegetables | Spinach, cooked, from fresh, fat not added in cooking           | 100                | 4.5                | A           | 1             |
| 72125212 | 3000_Vegetables | Spinach, cooked, from frozen, fat not added in cooking          | 100                | 4.5                | A           | 1             |
| 72125213 | 3000_Vegetables | Spinach, cooked, from canned, fat not added in cooking          | 100                | 4.5                | A           | 3             |
| 72125214 | 3000_Vegetables | Spinach, cooked, NS as to form, made with oil                   | 100                | 4.5                | A           | 3             |
| 72125215 | 3000_Vegetables | Spinach, cooked, NS as to form, made with butter                | 100                | 4.5                | A           | 2             |
| 72125216 | 3000_Vegetables | Spinach, cooked, NS as to form, made with margarine             | 100                | 4.5                | A           | 4             |
| 72125217 | 3000_Vegetables | Spinach, cooked, from fresh, made with oil                      | 100                | 4.5                | A           | 2             |

| foodcode | level1nd        | Description                                                                                                   | Food Compass Score | Health Star Rating | Nutri-Score | NOVA Category |
|----------|-----------------|---------------------------------------------------------------------------------------------------------------|--------------------|--------------------|-------------|---------------|
| 72125218 | 3000_Vegetables | Spinach, cooked, from fresh, made with butter                                                                 | 100                | 4.5                | A           | 2             |
| 72125219 | 3000_Vegetables | Spinach, cooked, from fresh, made with margarine                                                              | 100                | 4.5                | A           | 4             |
| 72125220 | 3000_Vegetables | Spinach, cooked, NS as to form, fat added in cooking, NS as to type of fat                                    | 100                | 4.5                | A           | 3             |
| 72125221 | 3000_Vegetables | Spinach, cooked, from fresh, fat added in cooking, NS as to type of fat                                       | 100                | 4.5                | A           | 3             |
| 72125222 | 3000_Vegetables | Spinach, cooked, from frozen, fat added in cooking, NS as to type of fat                                      | 100                | 4.5                | A           | 3             |
| 72125223 | 3000_Vegetables | Spinach, cooked, from canned, fat added in cooking, NS as to type of fat                                      | 100                | 4.5                | A           | 3             |
| 72125224 | 3000_Vegetables | Spinach, cooked, from frozen, made with oil                                                                   | 100                | 4.5                | A           | 2             |
| 72125225 | 3000_Vegetables | Spinach, cooked, from frozen, made with butter                                                                | 100                | 4.5                | A           | 2             |
| 72125226 | 3000_Vegetables | Spinach, cooked, from frozen, made with margarine                                                             | 100                | 4.5                | A           | 4             |
| 72125227 | 3000_Vegetables | Spinach, cooked, from canned, made with oil                                                                   | 100                | 4.5                | A           | 3             |
| 72125228 | 3000_Vegetables | Spinach, cooked, from canned, made with butter                                                                | 100                | 4                  | B           | 2             |
| 72125229 | 3000_Vegetables | Spinach, cooked, from canned, made with margarine                                                             | 100                | 4.5                | A           | 4             |
| 72126000 | 3000_Vegetables | Taro leaves, cooked, fat not added in cooking                                                                 | 100                | 5                  | A           | 1             |
| 72127000 | 3000_Vegetables | Thistle leaves, cooked, fat not added in cooking                                                              | 100                | 4                  | A           | 1             |
| 72128210 | 3000_Vegetables | Turnip greens, cooked, NS as to form, fat not added in cooking                                                | 100                | 5                  | A           | 1             |
| 72128211 | 3000_Vegetables | Turnip greens, cooked, from fresh, fat not added in cooking                                                   | 100                | 4.5                | A           | 1             |
| 72128212 | 3000_Vegetables | Turnip greens, cooked, from frozen, fat not added in cooking                                                  | 100                | 5                  | A           | 1             |
| 72128213 | 3000_Vegetables | Turnip greens, cooked, from canned, fat not added in cooking                                                  | 100                | 4                  | A           | 1             |
| 72128224 | 3000_Vegetables | Turnip greens, cooked, NS as to form, made with oil                                                           | 100                | 4.5                | A           | 3             |
| 72128226 | 3000_Vegetables | Turnip greens, cooked, NS as to form, made with margarine                                                     | 100                | 5                  | A           | 4             |
| 72128227 | 3000_Vegetables | Turnip greens, cooked, from fresh, made with oil                                                              | 100                | 4.5                | A           | 2             |
| 72128229 | 3000_Vegetables | Turnip greens, cooked, from fresh, made with margarine                                                        | 100                | 4.5                | A           | 4             |
| 72128230 | 3000_Vegetables | Turnip greens, cooked, from frozen, made with oil                                                             | 100                | 5                  | A           | 2             |
| 72128232 | 3000_Vegetables | Turnip greens, cooked, from frozen, made with margarine                                                       | 100                | 5                  | A           | 4             |
| 72128233 | 3000_Vegetables | Turnip greens, cooked, from canned, made with oil                                                             | 100                | 4                  | B           | 2             |
| 72128235 | 3000_Vegetables | Turnip greens, cooked, from canned, made with margarine                                                       | 100                | 4                  | B           | 4             |
| 72128236 | 3000_Vegetables | Turnip greens, canned, reduced sodium, cooked, NS as to fat added in cooking                                  | 100                | 4.5                | A           | 3             |
| 72128237 | 3000_Vegetables | Turnip greens, canned, reduced sodium, cooked, fat not added in cooking                                       | 100                | 4.5                | A           | 1             |
| 72128238 | 3000_Vegetables | Turnip greens, canned, reduced sodium, cooked, fat added in cooking, made with any type of fat                | 100                | 4.5                | A           | 3             |
| 72128410 | 3000_Vegetables | Turnip greens with roots, cooked, NS as to form, fat not added in cooking                                     | 100                | 4.5                | A           | 1             |
| 72128411 | 3000_Vegetables | Turnip greens with roots, cooked, from fresh, fat not added in cooking                                        | 100                | 4.5                | A           | 1             |
| 72128412 | 3000_Vegetables | Turnip greens with roots, cooked, from frozen, fat not added in cooking                                       | 100                | 4.5                | A           | 1             |
| 72128413 | 3000_Vegetables | Turnip greens with roots, cooked, from canned, fat not added in cooking                                       | 100                | 4                  | A           | 1             |
| 72130100 | 3000_Vegetables | Watercress, raw                                                                                               | 100                | 4.5                | A           | 1             |
| 72130199 | 3000_Vegetables | Watercress, cooked, NS as to fat added in cooking                                                             | 100                | 4                  | B           | 3             |
| 72130200 | 3000_Vegetables | Watercress, cooked, fat not added in cooking                                                                  | 100                | 4                  | A           | 1             |
| 72130201 | 3000_Vegetables | Watercress, cooked, fat added in cooking                                                                      | 100                | 2.5                | D           | 3             |
| 72132200 | 3000_Vegetables | Bitter melon leaves, horseradish leaves, jute leaves, or radish leaves, cooked, fat not added in cooking      | 100                | 4                  | B           | 1             |
| 72133200 | 3000_Vegetables | Sweet potato leaves, squash leaves, pumpkin leaves, chrysanthemum leaves, bean leaves, or swamp cabbage, cool | 100                | 4                  | A           | 1             |
| 72201100 | 3000_Vegetables | Broccoli, raw                                                                                                 | 100                | 5                  | A           | 1             |
| 72201210 | 3000_Vegetables | Broccoli, cooked, NS as to form, fat not added in cooking                                                     | 100                | 4.5                | A           | 1             |
| 72201211 | 3000_Vegetables | Broccoli, cooked, from fresh, fat not added in cooking                                                        | 100                | 4.5                | A           | 1             |
| 72201212 | 3000_Vegetables | Broccoli, cooked, from frozen, fat not added in cooking                                                       | 100                | 4.5                | A           | 1             |
| 72201213 | 3000_Vegetables | Broccoli, cooked, NS as to form, made with oil                                                                | 100                | 4.5                | A           | 2             |
| 72201223 | 3000_Vegetables | Broccoli, cooked, from fresh, made with oil                                                                   | 100                | 4.5                | A           | 2             |
| 72201226 | 3000_Vegetables | Broccoli, cooked, from frozen, made with oil                                                                  | 100                | 4.5                | A           | 2             |
| 72203000 | 3000_Vegetables | Broccoli, chinese, raw                                                                                        | 100                | 4.5                | A           | 1             |
| 72203040 | 3000_Vegetables | Broccoli, chinese, cooked, NS as to form, fat not added in cooking                                            | 100                | 4                  | A           | 1             |
| 72203050 | 3000_Vegetables | Broccoli, chinese, cooked, from fresh, fat not added in cooking                                               | 100                | 4                  | A           | 1             |
| 72203060 | 3000_Vegetables | Broccoli, chinese, cooked, from frozen, fat not added in cooking                                              | 100                | 4                  | A           | 1             |
| 72203080 | 3000_Vegetables | Broccoli, chinese, cooked, NS as to form, made with oil                                                       | 100                | 4                  | B           | 2             |
| 72203120 | 3000_Vegetables | Broccoli, chinese, cooked, from fresh, made with oil                                                          | 100                | 4                  | B           | 2             |
| 72203160 | 3000_Vegetables | Broccoli, chinese, cooked, from frozen, made with oil                                                         | 100                | 4                  | B           | 2             |
| 73101010 | 3000_Vegetables | Carrots, raw                                                                                                  | 100                | 4.5                | A           | 1             |
| 73103010 | 3000_Vegetables | Carrots, canned, low sodium, fat not added in cooking                                                         | 100                | 4.5                | A           | 1             |
| 73103021 | 3000_Vegetables | Carrots, canned, low sodium, made with oil                                                                    | 100                | 4.5                | A           | 2             |
| 73201010 | 3000_Vegetables | Pumpkin, cooked, NS as to form, fat not added in cooking                                                      | 100                | 4.5                | A           | 1             |
| 73201011 | 3000_Vegetables | Pumpkin, cooked, from fresh, fat not added in cooking                                                         | 100                | 4.5                | A           | 1             |
| 73201012 | 3000_Vegetables | Pumpkin, cooked, from frozen, fat not added in cooking                                                        | 100                | 4.5                | A           | 1             |
| 73302010 | 3000_Vegetables | Squash, winter type, raw                                                                                      | 100                | 4.5                | A           | 1             |
| 74101000 | 3000_Vegetables | Tomatoes, raw                                                                                                 | 100                | 4.5                | A           | 1             |
| 74102000 | 3000_Vegetables | Tomatoes, green, raw                                                                                          | 100                | 4.5                | A           | 1             |
| 74201000 | 3000_Vegetables | Tomatoes, cooked, NS as to form, NS as to method                                                              | 100                | 4.5                | A           | 1             |
| 74201001 | 3000_Vegetables | Tomatoes, cooked, from fresh, NS as to method                                                                 | 100                | 4.5                | A           | 1             |
| 74201003 | 3000_Vegetables | Tomatoes, cooked, from canned, NS as to method                                                                | 100                | 4.5                | A           | 3             |
| 74202010 | 3000_Vegetables | Tomatoes, NS as to form, broiled                                                                              | 100                | 4                  | B           | 1             |
| 74202011 | 3000_Vegetables | Tomatoes, from fresh, broiled                                                                                 | 100                | 4                  | B           | 1             |
| 74204500 | 3000_Vegetables | Tomatoes, canned, low sodium                                                                                  | 100                | 4.5                | A           | 1             |
| 74206000 | 3000_Vegetables | Tomatoes, red, dried                                                                                          | 100                | 5                  | A           | 1             |
| 74504010 | 3000_Vegetables | Tomato and okra, cooked, fat not added in cooking                                                             | 100                | 4.5                | A           | 2             |
| 74504021 | 3000_Vegetables | Tomato and okra, cooked, made with oil                                                                        | 100                | 4.5                | B           | 2             |
| 74504150 | 3000_Vegetables | Tomato and celery, cooked, fat not added in cooking                                                           | 100                | 4                  | A           | 1             |
| 75100250 | 3000_Vegetables | Raw vegetable, NFS                                                                                            | 100                | 4.5                | A           | 1             |
| 75100300 | 3000_Vegetables | Sprouts, NFS                                                                                                  | 100                | 4.5                | A           | 1             |
| 75100500 | 3000_Vegetables | Alfalfa sprouts, raw                                                                                          | 100                | 5                  | A           | 1             |
| 75100800 | 3000_Vegetables | Asparagus, raw                                                                                                | 100                | 5                  | A           | 1             |
| 75101000 | 3000_Vegetables | Bean sprouts, raw                                                                                             | 100                | 4.5                | A           | 1             |
| 75101800 | 3000_Vegetables | Beans, string, green, raw                                                                                     | 100                | 5                  | A           | 1             |
| 75102600 | 3000_Vegetables | Broccoflower, raw                                                                                             | 100                | 5                  | A           | 1             |
| 75102750 | 3000_Vegetables | Brussels sprouts, raw                                                                                         | 100                | 5                  | A           | 1             |
| 75103000 | 3000_Vegetables | Cabbage, green, raw                                                                                           | 100                | 4.5                | A           | 1             |
| 75104000 | 3000_Vegetables | Cabbage, chinese, raw                                                                                         | 100                | 4.5                | A           | 1             |
| 75105000 | 3000_Vegetables | Cabbage, red, raw                                                                                             | 100                | 4.5                | A           | 1             |
| 75105500 | 3000_Vegetables | Cactus, raw                                                                                                   | 100                | 4.5                | A           | 1             |
| 75107000 | 3000_Vegetables | Cauliflower, raw                                                                                              | 100                | 5                  | A           | 1             |
| 75109000 | 3000_Vegetables | Celery, raw                                                                                                   | 100                | 4.5                | A           | 1             |
| 75109010 | 3000_Vegetables | Fennel bulb, raw                                                                                              | 100                | 5                  | A           | 1             |
| 75111000 | 3000_Vegetables | Cucumber, raw                                                                                                 | 100                | 4.5                | A           | 1             |
| 75112000 | 3000_Vegetables | Eggplant, raw                                                                                                 | 100                | 5                  | A           | 1             |
| 75112000 | 3000_Vegetables | Kohlrabi, raw                                                                                                 | 100                | 5                  | A           | 1             |
| 75112500 | 3000_Vegetables | Leek, raw                                                                                                     | 100                | 4.5                | A           | 1             |
| 75113000 | 3000_Vegetables | Lettuce, raw                                                                                                  | 100                | 4.5                | A           | 1             |
| 75113060 | 3000_Vegetables | Lettuce, Boston, raw                                                                                          | 100                | 4.5                | A           | 1             |
| 75113070 | 3000_Vegetables | Lettuce, manoa                                                                                                | 100                | 4.5                | A           | 1             |
| 75113080 | 3000_Vegetables | Lettuce, arugula, raw                                                                                         | 100                | 4.5                | A           | 1             |
| 75114000 | 3000_Vegetables | Mixed salad greens, raw                                                                                       | 100                | 4.5                | A           | 1             |
| 75115000 | 3000_Vegetables | Mushrooms, raw                                                                                                | 100                | 4.5                | A           | 1             |
| 75117010 | 3000_Vegetables | Onions, young green, raw                                                                                      | 100                | 5                  | A           | 1             |
| 75120000 | 3000_Vegetables | Peas, green, raw                                                                                              | 100                | 5                  | A           | 1             |
| 75121400 | 3000_Vegetables | Pepper, poblano, raw                                                                                          | 100                | 4.5                | A           | 1             |
| 75121500 | 3000_Vegetables | Pepper, Serrano, raw                                                                                          | 100                | 5                  | A           | 1             |
| 75122000 | 3000_Vegetables | Pepper, raw, NFS                                                                                              | 100                | 4.5                | A           | 1             |
| 75122100 | 3000_Vegetables | Pepper, sweet, green, raw                                                                                     | 100                | 4.5                | A           | 1             |
| 75122200 | 3000_Vegetables | Pepper, sweet, red, raw                                                                                       | 100                | 4.5                | A           | 1             |

| foodcode | level1nd        | Description                                                                                                             | Food Compass Score | Health Star Rating | Nutri-Score | NOVA Category |
|----------|-----------------|-------------------------------------------------------------------------------------------------------------------------|--------------------|--------------------|-------------|---------------|
| 75124000 | 3000_Vegetables | Pepper, banana, raw                                                                                                     | 100                | 5                  | A           | 1             |
| 75125000 | 3000_Vegetables | Radish, raw                                                                                                             | 100                | 4.5                | A           | 1             |
| 75127000 | 3000_Vegetables | Rutabaga, raw                                                                                                           | 100                | 4.5                | A           | 1             |
| 75127500 | 3000_Vegetables | Seaweed, raw                                                                                                            | 100                | 4.5                | A           | 1             |
| 75127750 | 3000_Vegetables | Snowpeas, raw                                                                                                           | 100                | 5                  | A           | 1             |
| 75128000 | 3000_Vegetables | Squash, summer, yellow, raw                                                                                             | 100                | 4.5                | A           | 1             |
| 75128010 | 3000_Vegetables | Squash, summer, green, raw                                                                                              | 100                | 4.5                | A           | 1             |
| 75143000 | 3000_Vegetables | Lettuce, salad with assorted vegetables including tomatoes and/or carrots, no dressing                                  | 100                | 4.5                | A           | 1             |
| 75143050 | 3000_Vegetables | Lettuce, salad with assorted vegetables excluding tomatoes and carrots, no dressing                                     | 100                | 4.5                | A           | 1             |
| 75143100 | 3000_Vegetables | Lettuce, salad with avocado, tomato, and/or carrots, with or without other vegetables, no dressing                      | 100                | 5                  | A           | 1             |
| 75143300 | 3000_Vegetables | Lettuce, salad with egg, tomato, and/or carrots, with or without other vegetables, no dressing                          | 100                | 5                  | A           | 1             |
| 75202010 | 3000_Vegetables | Asparagus, cooked, NS as to form, fat not added in cooking                                                              | 100                | 4.5                | A           | 1             |
| 75202011 | 3000_Vegetables | Asparagus, cooked, from fresh, fat not added in cooking                                                                 | 100                | 4.5                | A           | 1             |
| 75202012 | 3000_Vegetables | Asparagus, cooked, from frozen, fat not added in cooking                                                                | 100                | 4.5                | A           | 1             |
| 75202013 | 3000_Vegetables | Asparagus, cooked, from canned, fat not added in cooking                                                                | 100                | 4                  | A           | 3             |
| 75202024 | 3000_Vegetables | Asparagus, cooked, NS as to form, made with oil                                                                         | 100                | 4.5                | A           | 2             |
| 75202027 | 3000_Vegetables | Asparagus, cooked, from fresh, made with oil                                                                            | 100                | 4.5                | A           | 2             |
| 75202031 | 3000_Vegetables | Asparagus, cooked, from frozen, made with oil                                                                           | 100                | 4.5                | A           | 1             |
| 75202033 | 3000_Vegetables | Asparagus, cooked, from frozen, made with margarine                                                                     | 100                | 4.5                | A           | 1             |
| 75202034 | 3000_Vegetables | Asparagus, cooked, from canned, made with oil                                                                           | 100                | 4                  | B           | 3             |
| 75203000 | 3000_Vegetables | Bamboo shoots, cooked, fat not added in cooking                                                                         | 100                | 4.5                | A           | 1             |
| 75203020 | 3000_Vegetables | Bamboo shoots, cooked, fat added in cooking                                                                             | 100                | 4.5                | A           | 2             |
| 75203028 | 3000_Vegetables | Bamboo shoots, cooked, NS as to fat added in cooking                                                                    | 100                | 4.5                | A           | 2             |
| 75204990 | 3000_Vegetables | Beans, string, cooked, NS as to form, NS as to color, fat not added in cooking                                          | 100                | 4.5                | A           | 1             |
| 75204993 | 3000_Vegetables | Beans, string, cooked, from canned, NS as to color, fat not added in cooking                                            | 100                | 4                  | A           | 1             |
| 75205020 | 3000_Vegetables | Beans, string, green, cooked, NS as to form, fat not added in cooking                                                   | 100                | 4.5                | A           | 1             |
| 75205023 | 3000_Vegetables | Beans, string, green, cooked, from canned, fat not added in cooking                                                     | 100                | 4                  | A           | 1             |
| 75205120 | 3000_Vegetables | Beans, string, green, canned, low sodium, fat not added in cooking                                                      | 100                | 4.5                | A           | 1             |
| 75205131 | 3000_Vegetables | Beans, string, green, canned, low sodium, made with oil                                                                 | 100                | 4.5                | A           | 2             |
| 75206011 | 3000_Vegetables | Beans, string, yellow, cooked, from fresh, fat not added in cooking                                                     | 100                | 4.5                | A           | 1             |
| 75208300 | 3000_Vegetables | Bitter melon, cooked, fat not added in cooking                                                                          | 100                | 4.5                | A           | 1             |
| 75208710 | 3000_Vegetables | Broccoli, cooked, fat not added in cooking                                                                              | 100                | 4.5                | A           | 1             |
| 75208730 | 3000_Vegetables | Broccoli, cooked, made with oil                                                                                         | 100                | 4.5                | A           | 1             |
| 75208750 | 3000_Vegetables | Broccoli, cooked, made with margarine                                                                                   | 100                | 4.5                | A           | 1             |
| 75209010 | 3000_Vegetables | Brussels sprouts, cooked, NS as to form, fat not added in cooking                                                       | 100                | 5                  | A           | 1             |
| 75209011 | 3000_Vegetables | Brussels sprouts, cooked, from fresh, fat not added in cooking                                                          | 100                | 4.5                | A           | 1             |
| 75209030 | 3000_Vegetables | Brussels sprouts, cooked, NS as to form, made with oil                                                                  | 100                | 5                  | A           | 2             |
| 75209040 | 3000_Vegetables | Brussels sprouts, cooked, from fresh, made with oil                                                                     | 100                | 4.5                | A           | 2             |
| 75209050 | 3000_Vegetables | Brussels sprouts, cooked, from frozen, made with oil                                                                    | 100                | 5                  | A           | 2             |
| 75210000 | 3000_Vegetables | Cabbage, Chinese, cooked, NS as to fat added in cooking                                                                 | 100                | 4.5                | B           | 3             |
| 75210010 | 3000_Vegetables | Cabbage, Chinese, cooked, fat not added in cooking                                                                      | 100                | 4.5                | A           | 1             |
| 75210020 | 3000_Vegetables | Cabbage, Chinese, cooked, fat added in cooking, NS as to type of fat                                                    | 100                | 4.5                | B           | 3             |
| 75210021 | 3000_Vegetables | Cabbage, Chinese, cooked, made with oil                                                                                 | 100                | 4.5                | B           | 3             |
| 75210023 | 3000_Vegetables | Cabbage, Chinese, cooked, made with margarine                                                                           | 100                | 4                  | B           | 1             |
| 75211020 | 3000_Vegetables | Cabbage, green, cooked, fat not added in cooking                                                                        | 100                | 4.5                | A           | 1             |
| 75212010 | 3000_Vegetables | Cabbage, red, cooked, fat not added in cooking                                                                          | 100                | 4.5                | A           | 1             |
| 75213010 | 3000_Vegetables | Cabbage, savoy, cooked, fat not added in cooking                                                                        | 100                | 4.5                | A           | 1             |
| 75213021 | 3000_Vegetables | Cabbage, savoy, cooked, made with oil                                                                                   | 100                | 4.5                | A           | 1             |
| 75213110 | 3000_Vegetables | Cactus, cooked, fat not added in cooking                                                                                | 100                | 4.5                | A           | 1             |
| 75213121 | 3000_Vegetables | Cactus, cooked, made with oil                                                                                           | 100                | 4.5                | A           | 3             |
| 75213123 | 3000_Vegetables | Cactus, cooked, made with margarine                                                                                     | 100                | 4                  | A           | 1             |
| 75214010 | 3000_Vegetables | Cauliflower, cooked, NS as to form, fat not added in cooking                                                            | 100                | 4.5                | A           | 1             |
| 75214011 | 3000_Vegetables | Cauliflower, cooked, from fresh, fat not added in cooking                                                               | 100                | 4.5                | A           | 1             |
| 75214012 | 3000_Vegetables | Cauliflower, cooked, from frozen, fat not added in cooking                                                              | 100                | 4.5                | A           | 1             |
| 75214013 | 3000_Vegetables | Cauliflower, cooked, from canned, fat not added in cooking                                                              | 100                | 4.5                | A           | 3             |
| 75214024 | 3000_Vegetables | Cauliflower, cooked, NS as to form, made with oil                                                                       | 100                | 4.5                | A           | 2             |
| 75214026 | 3000_Vegetables | Cauliflower, cooked, NS as to form, made with margarine                                                                 | 100                | 4.5                | A           | 1             |
| 75214030 | 3000_Vegetables | Cauliflower, cooked, from frozen, made with oil                                                                         | 100                | 4.5                | A           | 2             |
| 75214033 | 3000_Vegetables | Cauliflower, cooked, from canned, made with oil                                                                         | 100                | 4.5                | A           | 3             |
| 75215010 | 3000_Vegetables | Celery, cooked, fat not added in cooking                                                                                | 100                | 4                  | A           | 1             |
| 75217300 | 3000_Vegetables | Flowers or blossoms of sesbania, squash, or lily, fat not added in cooking                                              | 100                | 4                  | A           | 1             |
| 75219010 | 3000_Vegetables | Mushrooms, cooked, NS as to form, fat not added in cooking                                                              | 100                | 4.5                | A           | 1             |
| 75219011 | 3000_Vegetables | Mushrooms, cooked, from fresh, fat not added in cooking                                                                 | 100                | 4.5                | A           | 1             |
| 75219012 | 3000_Vegetables | Mushrooms, cooked, from frozen, fat not added in cooking                                                                | 100                | 4.5                | A           | 1             |
| 75219030 | 3000_Vegetables | Mushrooms, cooked, NS as to form, made with oil                                                                         | 100                | 4.5                | A           | 2             |
| 75219032 | 3000_Vegetables | Mushrooms, cooked, NS as to form, made with margarine                                                                   | 100                | 4.5                | A           | 1             |
| 75219033 | 3000_Vegetables | Mushrooms, cooked, from fresh, made with oil                                                                            | 100                | 4.5                | A           | 2             |
| 75219036 | 3000_Vegetables | Mushrooms, cooked, from frozen, made with oil                                                                           | 100                | 4.5                | A           | 2             |
| 75220010 | 3000_Vegetables | Okra, cooked, NS as to form, fat not added in cooking                                                                   | 100                | 4.5                | A           | 1             |
| 75220011 | 3000_Vegetables | Okra, cooked, from fresh, fat not added in cooking                                                                      | 100                | 4.5                | A           | 1             |
| 75220012 | 3000_Vegetables | Okra, cooked, from frozen, fat not added in cooking                                                                     | 100                | 4.5                | A           | 1             |
| 75220013 | 3000_Vegetables | Okra, cooked, from canned, fat not added in cooking                                                                     | 100                | 4.5                | A           | 3             |
| 75220024 | 3000_Vegetables | Okra, cooked, NS as to form, made with oil                                                                              | 100                | 4.5                | B           | 1             |
| 75220027 | 3000_Vegetables | Okra, cooked, from fresh, made with oil                                                                                 | 100                | 4.5                | A           | 2             |
| 75220029 | 3000_Vegetables | Okra, cooked, from fresh, made with margarine                                                                           | 100                | 4.5                | A           | 1             |
| 75220034 | 3000_Vegetables | Okra, cooked, from canned, made with oil                                                                                | 100                | 4.5                | A           | 3             |
| 75220036 | 3000_Vegetables | Okra, cooked, from canned, made with margarine                                                                          | 100                | 4.5                | A           | 3             |
| 75220050 | 3000_Vegetables | Lettuce, cooked, fat not added in cooking                                                                               | 100                | 4.5                | A           | 1             |
| 75220099 | 3000_Vegetables | Luffa, cooked, NS as to fat added in cooking                                                                            | 100                | 4.5                | A           | 1             |
| 75220100 | 3000_Vegetables | Luffa, cooked, fat not added in cooking                                                                                 | 100                | 4.5                | A           | 1             |
| 75220101 | 3000_Vegetables | Luffa, cooked, fat added in cooking                                                                                     | 100                | 4.5                | A           | 2             |
| 75227100 | 3000_Vegetables | Radish, daikon, cooked, fat not added in cooking                                                                        | 100                | 4                  | A           | 1             |
| 75230010 | 3000_Vegetables | Sauerkraut, cooked, fat not added in cooking                                                                            | 100                | 4                  | A           | 3             |
| 75232100 | 3000_Vegetables | Seaweed, cooked, NS as to fat added in cooking                                                                          | 100                | 4.5                | A           | 2             |
| 75232110 | 3000_Vegetables | Seaweed, cooked, fat not added in cooking                                                                               | 100                | 4.5                | A           | 1             |
| 75232120 | 3000_Vegetables | Seaweed, cooked, fat added in cooking, NS as to type of fat                                                             | 100                | 4.5                | A           | 2             |
| 75232121 | 3000_Vegetables | Seaweed, cooked, made with oil                                                                                          | 100                | 4.5                | A           | 2             |
| 75232123 | 3000_Vegetables | Seaweed, cooked, made with margarine                                                                                    | 100                | 4.5                | A           | 1             |
| 75233010 | 3000_Vegetables | Squash, summer, yellow or green, cooked, NS as to form, fat not added in cooking                                        | 100                | 4.5                | A           | 1             |
| 75233011 | 3000_Vegetables | Squash, summer, yellow or green, cooked, from fresh, fat not added in cooking                                           | 100                | 4.5                | A           | 1             |
| 75233012 | 3000_Vegetables | Squash, summer, yellow or green, cooked, from frozen, fat not added in cooking                                          | 100                | 4.5                | A           | 1             |
| 75233013 | 3000_Vegetables | Squash, summer, yellow or green, cooked, from canned, fat not added in cooking                                          | 100                | 4.5                | A           | 1             |
| 75311110 | 3000_Vegetables | Mixed vegetables, canned, low sodium, fat not added in cooking                                                          | 100                | 5                  | A           | 1             |
| 75311121 | 3000_Vegetables | Mixed vegetables, canned, low sodium, made with oil                                                                     | 100                | 5                  | A           | 3             |
| 75316030 | 3000_Vegetables | Squash, summer, yellow or green, with tomato sauce, cooked, fat not added in cooking                                    | 100                | 4.5                | A           | 2             |
| 75330110 | 3000_Vegetables | Vegetable combination, including carrots, broccoli, and/or dark-green leafy; cooked, no sauce, fat not added in cooking | 100                | 4.5                | A           | 1             |
| 75330121 | 3000_Vegetables | Vegetable combination, including carrots, broccoli, and/or dark-green leafy; cooked, no sauce, made with oil            | 100                | 4.5                | B           | 2             |
| 75500110 | 3000_Vegetables | Beans, string, green, pickled                                                                                           | 100                | 4.5                | A           | 3             |
| 75500510 | 3000_Vegetables | Celery, pickled                                                                                                         | 100                | 4.5                | A           | 3             |
| 75502520 | 3000_Vegetables | Kimchi                                                                                                                  | 100                | 4                  | A           | 3             |
| 75505000 | 3000_Vegetables | Mushrooms, pickled                                                                                                      | 100                | 4.5                | A           | 3             |
| 75507000 | 3000_Vegetables | Okra, pickled                                                                                                           | 100                | 4.5                | A           | 3             |
| 75209042 | 3000_Vegetables | Brussels sprouts, cooked, from fresh, made with margarine                                                               | 100                | 4.5                | A           | 1             |
| 75220031 | 3000_Vegetables | Okra, cooked, from frozen, made with oil                                                                                | 100                | 4.5                | B           | 2             |



| foodcode | level1nd        | Description                                                                                                    | Food Compass Score | Health Star Rating | Nutri-Score | NOVA Category |
|----------|-----------------|----------------------------------------------------------------------------------------------------------------|--------------------|--------------------|-------------|---------------|
| 75302010 | 3000_Vegetables | Beans, string, green, with tomatoes, cooked, fat not added in cooking                                          | 100                | 4.5                | A           | 2             |
| 72122235 | 3000_Vegetables | Mustard greens, cooked, from canned, made with margarine                                                       | 99                 | 4.5                | A           | 4             |
| 75215110 | 3000_Vegetables | Fennel bulb, cooked, fat not added in cooking                                                                  | 99                 | 4.5                | A           | 1             |
| 72203100 | 3000_Vegetables | Broccoli, chinese, cooked, NS as to form, made with margarine                                                  | 99                 | 4                  | B           | 4             |
| 72203140 | 3000_Vegetables | Broccoli, chinese, cooked, from fresh, made with margarine                                                     | 99                 | 4                  | B           | 4             |
| 72203180 | 3000_Vegetables | Broccoli, chinese, cooked, from frozen, made with margarine                                                    | 99                 | 4                  | B           | 4             |
| 72103010 | 3000_Vegetables | Broccoli raab, cooked, NS as to fat added in cooking                                                           | 99                 | 4.5                | A           | 3             |
| 72103030 | 3000_Vegetables | Broccoli raab, cooked, fat added in cooking, NS as to type of fat                                              | 99                 | 4.5                | A           | 3             |
| 75209012 | 3000_Vegetables | Brussels sprouts, cooked, from frozen, fat not added in cooking                                                | 99                 | 5                  | A           | 1             |
| 72119226 | 3000_Vegetables | Kale, cooked, NS as to form, made with margarine                                                               | 99                 | 4.5                | A           | 4             |
| 72120250 | 3000_Vegetables | Lambsquarter, cooked, made with margarine                                                                      | 99                 | 4.5                | A           | 4             |
| 75213023 | 3000_Vegetables | Cabbage, savoy, cooked, made with margarine                                                                    | 99                 | 4.5                | A           | 1             |
| 75302048 | 3000_Vegetables | Beans, string, green, with almonds, cooked, made with margarine                                                | 99                 | 4.5                | A           | 1             |
| 72101240 | 3000_Vegetables | Beet greens, cooked, made with butter                                                                          | 99                 | 4                  | B           | 2             |
| 72104240 | 3000_Vegetables | Chard, cooked, made with butter                                                                                | 99                 | 4                  | B           | 2             |
| 75311123 | 3000_Vegetables | Mixed vegetables, canned, low sodium, made with margarine                                                      | 99                 | 5                  | A           | 3             |
| 75221050 | 3000_Vegetables | Onions, green, cooked, NS as to form, fat not added in cooking                                                 | 99                 | 4.5                | A           | 1             |
| 75515100 | 3000_Vegetables | Vegetables, pickled                                                                                            | 99                 | 4.5                | A           | 3             |
| 75215050 | 3000_Vegetables | Celery, cooked, made with margarine                                                                            | 99                 | 4                  | B           | 1             |
| 75202026 | 3000_Vegetables | Asparagus, cooked, NS as to form, made with margarine                                                          | 99                 | 4.5                | A           | 4             |
| 75511100 | 3000_Vegetables | Pickles, NS as to vegetable                                                                                    | 99                 | 3.5                | B           | 3             |
| 75235750 | 3000_Vegetables | Winter melon, cooked                                                                                           | 99                 | 4                  | A           | 1             |
| 75233027 | 3000_Vegetables | Squash, summer, yellow or green, cooked, from fresh, made with oil                                             | 98                 | 4.5                | B           | 2             |
| 75502500 | 3000_Vegetables | Cabbage, fresh, pickled, Japanese style                                                                        | 98                 | 4.5                | A           | 3             |
| 72113250 | 3000_Vegetables | Dandelion greens, cooked, made with margarine                                                                  | 98                 | 4.5                | A           | 4             |
| 73201024 | 3000_Vegetables | Pumpkin, cooked, NS as to form, made with oil                                                                  | 98                 | 4.5                | B           | 2             |
| 73201027 | 3000_Vegetables | Pumpkin, cooked, from fresh, made with oil                                                                     | 98                 | 4.5                | B           | 2             |
| 73201030 | 3000_Vegetables | Pumpkin, cooked, from frozen, made with oil                                                                    | 98                 | 4.5                | B           | 2             |
| 72128225 | 3000_Vegetables | Turnip greens, cooked, NS as to form, made with butter                                                         | 98                 | 4.5                | A           | 2             |
| 75214027 | 3000_Vegetables | Cauliflower, cooked, from fresh, made with oil                                                                 | 98                 | 4.5                | A           | 2             |
| 72125999 | 3000_Vegetables | Taro leaves, cooked, NS as to fat added in cooking                                                             | 98                 | 5                  | A           | 3             |
| 72126001 | 3000_Vegetables | Taro leaves, cooked, fat added in cooking                                                                      | 98                 | 5                  | A           | 3             |
| 75215030 | 3000_Vegetables | Celery, cooked, made with oil                                                                                  | 98                 | 4                  | B           | 2             |
| 75206012 | 3000_Vegetables | Beans, string, yellow, cooked, from frozen, fat not added in cooking                                           | 98                 | 4.5                | A           | 1             |
| 75129000 | 3000_Vegetables | Turnip, raw                                                                                                    | 98                 | 4.5                | A           | 1             |
| 75234010 | 3000_Vegetables | Turnip, cooked, NS as to form, fat not added in cooking                                                        | 98                 | 4.5                | A           | 1             |
| 75234012 | 3000_Vegetables | Turnip, cooked, from frozen, fat not added in cooking                                                          | 98                 | 4.5                | A           | 1             |
| 75204992 | 3000_Vegetables | Beans, string, cooked, from frozen, NS as to color, fat not added in cooking                                   | 98                 | 4.5                | A           | 1             |
| 75205022 | 3000_Vegetables | Beans, string, green, cooked, from frozen, fat not added in cooking                                            | 98                 | 4.5                | A           | 1             |
| 75340021 | 3000_Vegetables | Vegetable combinations, Asian style, broccoli, green pepper, water chestnut, etc., cooked, made with oil       | 97                 | 4.5                | A           | 2             |
| 75302040 | 3000_Vegetables | Beans, string, green, with almonds, cooked, fat not added in cooking                                           | 97                 | 4.5                | A           | 1             |
| 75208290 | 3000_Vegetables | Bitter melon, cooked, NS as to fat added in cooking                                                            | 97                 | 4                  | B           | 2             |
| 75208310 | 3000_Vegetables | Bitter melon, cooked, fat added in cooking                                                                     | 97                 | 4                  | B           | 2             |
| 72128231 | 3000_Vegetables | Turnip greens, cooked, from frozen, made with butter                                                           | 97                 | 4.5                | A           | 2             |
| 75212021 | 3000_Vegetables | Cabbage, red, cooked, made with oil                                                                            | 97                 | 4.5                | B           | 2             |
| 75211031 | 3000_Vegetables | Cabbage, green, cooked, made with oil                                                                          | 97                 | 4.5                | A           | 2             |
| 75214035 | 3000_Vegetables | Cauliflower, cooked, from canned, made with margarine                                                          | 97                 | 4.5                | A           | 3             |
| 72119229 | 3000_Vegetables | Kale, cooked, from fresh, made with margarine                                                                  | 97                 | 4.5                | A           | 4             |
| 63105010 | 3000_Vegetables | Avocado, raw                                                                                                   | 97                 | 5                  | A           | 1             |
| 72118200 | 3000_Vegetables | Greens, cooked, NS as to form, NS as to fat added in cooking                                                   | 97                 | 4.5                | A           | 3             |
| 72118201 | 3000_Vegetables | Greens, cooked, from fresh, NS as to fat added in cooking                                                      | 97                 | 4.5                | A           | 3             |
| 72118220 | 3000_Vegetables | Greens, cooked, NS as to form, fat added in cooking, NS as to type of fat                                      | 97                 | 4.5                | A           | 3             |
| 72118221 | 3000_Vegetables | Greens, cooked, from fresh, fat added in cooking, NS as to type of fat                                         | 97                 | 4.5                | A           | 3             |
| 75302046 | 3000_Vegetables | Beans, string, green, with almonds, cooked, made with oil                                                      | 96                 | 4.5                | A           | 1             |
| 75202029 | 3000_Vegetables | Asparagus, cooked, from fresh, made with margarine                                                             | 96                 | 4.5                | A           | 4             |
| 72128202 | 3000_Vegetables | Turnip greens, cooked, from frozen, NS as to fat added in cooking                                              | 96                 | 4.5                | A           | 3             |
| 72128222 | 3000_Vegetables | Turnip greens, cooked, from frozen, fat added in cooking, NS as to type of fat                                 | 96                 | 4.5                | A           | 3             |
| 72119232 | 3000_Vegetables | Kale, cooked, from frozen, made with margarine                                                                 | 96                 | 4.5                | B           | 4             |
| 75231026 | 3000_Vegetables | Snowpea, cooked, from fresh, made with oil                                                                     | 96                 | 4.5                | A           | 2             |
| 72107232 | 3000_Vegetables | Collards, cooked, from frozen, made with margarine                                                             | 96                 | 4.5                | A           | 4             |
| 75233024 | 3000_Vegetables | Squash, summer, yellow or green, cooked, NS as to form, made with oil                                          | 96                 | 4.5                | B           | 2             |
| 75220026 | 3000_Vegetables | Okra, cooked, NS as to form, made with margarine                                                               | 96                 | 4.5                | A           | 1             |
| 75206033 | 3000_Vegetables | Beans, string, yellow, cooked, from fresh, made with oil                                                       | 96                 | 4.5                | A           | 1             |
| 75221051 | 3000_Vegetables | Onions, green, cooked, from fresh, fat not added in cooking                                                    | 96                 | 4.5                | A           | 1             |
| 75233035 | 3000_Vegetables | Squash, summer, yellow or green, cooked, from canned, made with margarine                                      | 96                 | 4.5                | A           | 3             |
| 75207010 | 3000_Vegetables | Bean sprouts, cooked, NS as to form, fat not added in cooking                                                  | 96                 | 4                  | B           | 1             |
| 75207011 | 3000_Vegetables | Bean sprouts, cooked, from fresh, fat not added in cooking                                                     | 96                 | 4                  | B           | 1             |
| 72128200 | 3000_Vegetables | Turnip greens, cooked, NS as to form, NS as to fat added in cooking                                            | 96                 | 4.5                | A           | 3             |
| 72128220 | 3000_Vegetables | Turnip greens, cooked, NS as to form, fat added in cooking, NS as to type of fat                               | 96                 | 4.5                | A           | 3             |
| 72118223 | 3000_Vegetables | Greens, cooked, from canned, fat added in cooking, NS as to type of fat                                        | 96                 | 4.5                | A           | 3             |
| 75206013 | 3000_Vegetables | Beans, string, yellow, cooked, from canned, fat not added in cooking                                           | 96                 | 4                  | A           | 3             |
| 75340023 | 3000_Vegetables | Vegetable combinations, Asian style, broccoli, green pepper, water chestnut, etc., cooked, made with margarine | 96                 | 4.5                | A           | 1             |
| 72118203 | 3000_Vegetables | Greens, cooked, from canned, NS as to fat added in cooking                                                     | 96                 | 4.5                | A           | 3             |
| 75215123 | 3000_Vegetables | Fennel bulb, cooked, made with margarine                                                                       | 96                 | 4.5                | A           | 1             |
| 72122202 | 3000_Vegetables | Mustard greens, cooked, from frozen, NS as to fat added in cooking                                             | 95                 | 4.5                | A           | 3             |
| 72122220 | 3000_Vegetables | Mustard greens, cooked, NS as to form, fat added in cooking, NS as to type of fat                              | 95                 | 4.5                | A           | 3             |
| 72122222 | 3000_Vegetables | Mustard greens, cooked, from frozen, fat added in cooking, NS as to type of fat                                | 95                 | 4.5                | A           | 3             |
| 75202036 | 3000_Vegetables | Asparagus, cooked, from canned, made with margarine                                                            | 95                 | 4                  | B           | 4             |
| 75233026 | 3000_Vegetables | Squash, summer, yellow or green, cooked, NS as to form, made with margarine                                    | 95                 | 4.5                | B           | 1             |
| 72128228 | 3000_Vegetables | Turnip greens, cooked, from fresh, made with butter                                                            | 95                 | 4.5                | A           | 2             |
| 72128201 | 3000_Vegetables | Turnip greens, cooked, from fresh, NS as to fat added in cooking                                               | 95                 | 4.5                | A           | 3             |
| 72128221 | 3000_Vegetables | Turnip greens, cooked, from fresh, fat added in cooking, NS as to type of fat                                  | 95                 | 4.5                | A           | 3             |
| 72118202 | 3000_Vegetables | Greens, cooked, from frozen, NS as to fat added in cooking                                                     | 95                 | 4.5                | B           | 3             |
| 72118222 | 3000_Vegetables | Greens, cooked, from frozen, fat added in cooking, NS as to type of fat                                        | 95                 | 4.5                | B           | 3             |
| 75511040 | 3000_Vegetables | Pepper, hot, pickled                                                                                           | 95                 | 3                  | B           | 4             |
| 75316000 | 3000_Vegetables | Squash, summer, yellow or green, and onions, cooked, fat not added in cooking                                  | 95                 | 4.5                | B           | 1             |
| 72103050 | 3000_Vegetables | Broccoli raab, cooked, made with butter                                                                        | 95                 | 4.5                | A           | 2             |
| 73201033 | 3000_Vegetables | Pumpkin, cooked, from canned, made with oil                                                                    | 95                 | 4.5                | A           | 2             |
| 75502550 | 3000_Vegetables | Cabbage, mustard, salted                                                                                       | 95                 | 4                  | A           | 3             |
| 72126999 | 3000_Vegetables | Thistle leaves, cooked, NS as to fat added in cooking                                                          | 94                 | 4                  | B           | 3             |
| 72127001 | 3000_Vegetables | Thistle leaves, cooked, fat added in cooking                                                                   | 94                 | 4                  | B           | 3             |
| 75202000 | 3000_Vegetables | Asparagus, cooked, NS as to form, NS as to fat added in cooking                                                | 94                 | 4.5                | A           | 3             |
| 75202020 | 3000_Vegetables | Asparagus, cooked, NS as to form, fat added in cooking, NS as to type of fat                                   | 94                 | 4.5                | A           | 3             |
| 75202022 | 3000_Vegetables | Asparagus, cooked, from frozen, fat added in cooking, NS as to type of fat                                     | 94                 | 4.5                | A           | 3             |
| 75227099 | 3000_Vegetables | Radish, daikon, cooked, NS as to fat added in cooking                                                          | 94                 | 4.5                | A           | 2             |
| 72119235 | 3000_Vegetables | Kale, cooked, from canned, made with margarine                                                                 | 94                 | 4.5                | A           | 4             |
| 75231011 | 3000_Vegetables | Snowpea, cooked, from fresh, fat not added in cooking                                                          | 94                 | 4.5                | A           | 1             |
| 75215121 | 3000_Vegetables | Fennel bulb, cooked, made with oil                                                                             | 94                 | 2.5                | B           | 2             |
| 75202003 | 3000_Vegetables | Asparagus, cooked, from canned, NS as to fat added in cooking                                                  | 94                 | 4                  | B           | 3             |
| 75202023 | 3000_Vegetables | Asparagus, cooked, from canned, fat added in cooking, NS as to type of fat                                     | 94                 | 4                  | B           | 3             |
| 75117020 | 3000_Vegetables | Onions, mature, raw                                                                                            | 94                 | 4.5                | A           | 1             |
| 75204991 | 3000_Vegetables | Beans, string, cooked, from fresh, NS as to color, fat not added in cooking                                    | 94                 | 4.5                | A           | 1             |
| 75205021 | 3000_Vegetables | Beans, string, green, cooked, from fresh, fat not added in cooking                                             | 94                 | 4.5                | A           | 1             |
| 72107235 | 3000_Vegetables | Collards, cooked, from canned, made with margarine                                                             | 93                 | 4.5                | A           | 4             |

| foodcode | level1nd        | Description                                                                                                         | Food Compass Score | Health Star Rating | Nutri-Score | NOVA Category |
|----------|-----------------|---------------------------------------------------------------------------------------------------------------------|--------------------|--------------------|-------------|---------------|
| 75231001 | 3000_Vegetables | Snowpea, cooked, from fresh, NS as to fat added in cooking                                                          | 93                 | 4.5                | A           | 2             |
| 75231021 | 3000_Vegetables | Snowpea, cooked, from fresh, fat added in cooking, NS as to type of fat                                             | 93                 | 4.5                | A           | 2             |
| 75231023 | 3000_Vegetables | Snowpea, cooked, NS as to form, made with oil                                                                       | 93                 | 5                  | A           | 1             |
| 75233030 | 3000_Vegetables | Squash, summer, yellow or green, cooked, from frozen, made with oil                                                 | 93                 | 4.5                | B           | 2             |
| 75202001 | 3000_Vegetables | Asparagus, cooked, from fresh, NS as to fat added in cooking                                                        | 93                 | 4.5                | A           | 3             |
| 75202021 | 3000_Vegetables | Asparagus, cooked, from fresh, fat added in cooking, NS as to type of fat                                           | 93                 | 4.5                | A           | 3             |
| 75210022 | 3000_Vegetables | Cabbage, Chinese, cooked, made with butter                                                                          | 93                 | 4                  | B           | 2             |
| 75205133 | 3000_Vegetables | Beans, string, green, canned, low sodium, made with margarine                                                       | 93                 | 4.5                | A           | 4             |
| 75340200 | 3000_Vegetables | Jai, Monk's Food                                                                                                    | 93                 | 5                  | A           | 1             |
| 75226061 | 3000_Vegetables | Peppers, red, cooked, made with oil                                                                                 | 93                 | 4                  | B           | 2             |
| 75219013 | 3000_Vegetables | Mushrooms, cooked, from canned, fat not added in cooking                                                            | 93                 | 4                  | B           | 3             |
| 75206035 | 3000_Vegetables | Beans, string, yellow, cooked, from fresh, made with margarine                                                      | 93                 | 4.5                | A           | 1             |
| 73102213 | 3000_Vegetables | Carrots, cooked, from canned, fat not added in cooking                                                              | 93                 | 4                  | A           | 3             |
| 75231028 | 3000_Vegetables | Snowpea, cooked, from fresh, made with margarine                                                                    | 93                 | 4.5                | A           | 1             |
| 73201013 | 3000_Vegetables | Pumpkin, cooked, from canned, fat not added in cooking                                                              | 93                 | 4.5                | A           | 1             |
| 75214032 | 3000_Vegetables | Cauliflower, cooked, from frozen, made with margarine                                                               | 92                 | 4.5                | A           | 4             |
| 75233033 | 3000_Vegetables | Squash, summer, yellow or green, cooked, from canned, made with oil                                                 | 92                 | 4.5                | A           | 3             |
| 72120200 | 3000_Vegetables | Lambquarter, cooked, NS as to fat added in cooking                                                                  | 92                 | 4.5                | A           | 3             |
| 72120220 | 3000_Vegetables | Lambquarter, cooked, fat added in cooking, NS as to type of fat                                                     | 92                 | 4.5                | A           | 3             |
| 75231029 | 3000_Vegetables | Snowpea, cooked, from frozen, made with oil                                                                         | 92                 | 5                  | A           | 2             |
| 72201225 | 3000_Vegetables | Broccoli, cooked, from fresh, made with margarine                                                                   | 92                 | 4.5                | A           | 4             |
| 74504023 | 3000_Vegetables | Tomato and okra, cooked, made with margarine                                                                        | 92                 | 4.5                | B           | 4             |
| 74504110 | 3000_Vegetables | Tomato and onion, cooked, fat not added in cooking                                                                  | 92                 | 4.5                | A           | 1             |
| 73103023 | 3000_Vegetables | Carrots, canned, low sodium, made with margarine                                                                    | 92                 | 4.5                | A           | 4             |
| 75302039 | 3000_Vegetables | Beans, string, green, with almonds, cooked, NS as to fat added in cooking                                           | 92                 | 4.5                | A           | 1             |
| 72107221 | 3000_Vegetables | Collards, cooked, from fresh, fat added in cooking, NS as to type of fat                                            | 92                 | 5                  | A           | 3             |
| 72107200 | 3000_Vegetables | Collards, cooked, NS as to form, NS as to fat added in cooking                                                      | 92                 | 5                  | A           | 3             |
| 72107201 | 3000_Vegetables | Collards, cooked, from fresh, NS as to fat added in cooking                                                         | 92                 | 5                  | A           | 3             |
| 72107220 | 3000_Vegetables | Collards, cooked, NS as to form, fat added in cooking, NS as to type of fat                                         | 92                 | 5                  | A           | 3             |
| 75201031 | 3000_Vegetables | Artichoke, cooked, NS as to form, made with oil                                                                     | 92                 | 4.5                | A           | 1             |
| 72118225 | 3000_Vegetables | Greens, cooked, NS as to form, made with butter                                                                     | 91                 | 4.5                | A           | 2             |
| 72118228 | 3000_Vegetables | Greens, cooked, from fresh, made with butter                                                                        | 91                 | 4.5                | A           | 2             |
| 75233032 | 3000_Vegetables | Squash, summer, yellow or green, cooked, from frozen, made with margarine                                           | 91                 | 4.5                | B           | 1             |
| 75302060 | 3000_Vegetables | Beans, string, green, with pinto beans, cooked, fat not added in cooking                                            | 91                 | 5                  | A           | 1             |
| 72203010 | 3000_Vegetables | Broccoli, chinese, cooked, NS as to form, NS as to fat added in cooking                                             | 91                 | 4                  | B           | 3             |
| 72203020 | 3000_Vegetables | Broccoli, chinese, cooked, from fresh, NS as to fat added in cooking                                                | 91                 | 4                  | B           | 3             |
| 72203030 | 3000_Vegetables | Broccoli, chinese, cooked, from frozen, NS as to fat added in cooking                                               | 91                 | 4                  | B           | 3             |
| 72203070 | 3000_Vegetables | Broccoli, chinese, cooked, NS as to form, fat added in cooking, NS as to type of fat                                | 91                 | 4                  | B           | 3             |
| 72203110 | 3000_Vegetables | Broccoli, chinese, cooked, from fresh, fat added in cooking, NS as to type of fat                                   | 91                 | 4                  | B           | 3             |
| 72203150 | 3000_Vegetables | Broccoli, chinese, cooked, from frozen, fat added in cooking, NS as to type of fat                                  | 91                 | 4                  | B           | 3             |
| 73301010 | 3000_Vegetables | Squash, winter type, mashed, no fat or sugar added in cooking                                                       | 91                 | 4.5                | A           | 1             |
| 72123000 | 3000_Vegetables | Poke greens, cooked, NS as to fat added in cooking                                                                  | 91                 | 4.5                | B           | 3             |
| 72123020 | 3000_Vegetables | Poke greens, cooked, fat added in cooking, NS as to type of fat                                                     | 91                 | 4.5                | B           | 3             |
| 72122231 | 3000_Vegetables | Mustard greens, cooked, from frozen, made with butter                                                               | 91                 | 4.5                | A           | 2             |
| 75212023 | 3000_Vegetables | Cabbage, red, cooked, made with margarine                                                                           | 91                 | 4.5                | A           | 1             |
| 73102227 | 3000_Vegetables | Carrots, cooked, from canned, made with oil                                                                         | 91                 | 4                  | B           | 3             |
| 73303021 | 3000_Vegetables | Squash, winter type, baked, no sugar added in cooking, made with oil                                                | 91                 | 4.5                | A           | 2             |
| 73303010 | 3000_Vegetables | Squash, winter type, baked, no fat or sugar added in cooking                                                        | 91                 | 4.5                | A           | 1             |
| 75231002 | 3000_Vegetables | Snowpea, cooked, from frozen, NS as to fat added in cooking                                                         | 91                 | 5                  | A           | 1             |
| 72128400 | 3000_Vegetables | Turnip greens with roots, cooked, NS as to form, NS as to fat added in cooking                                      | 91                 | 4.5                | A           | 3             |
| 72128402 | 3000_Vegetables | Turnip greens with roots, cooked, from frozen, NS as to fat added in cooking                                        | 91                 | 4.5                | A           | 3             |
| 72128420 | 3000_Vegetables | Turnip greens with roots, cooked, NS as to form, fat added in cooking                                               | 91                 | 4.5                | A           | 3             |
| 72128422 | 3000_Vegetables | Turnip greens with roots, cooked, from frozen, fat added in cooking                                                 | 91                 | 4.5                | A           | 3             |
| 75227110 | 3000_Vegetables | Radish, daikon, cooked, fat added in cooking                                                                        | 91                 | 4.5                | A           | 2             |
| 75224120 | 3000_Vegetables | Peas, green, canned, low sodium, fat not added in cooking                                                           | 91                 | 5                  | A           | 1             |
| 72120240 | 3000_Vegetables | Lambquarter, cooked, made with butter                                                                               | 91                 | 4.5                | B           | 2             |
| 72118234 | 3000_Vegetables | Greens, cooked, from canned, made with butter                                                                       | 90                 | 4.5                | A           | 2             |
| 75226021 | 3000_Vegetables | Peppers, green, cooked, made with oil                                                                               | 90                 | 4                  | B           | 2             |
| 75201040 | 3000_Vegetables | Artichoke, cooked, from frozen, made with oil                                                                       | 90                 | 4.5                | A           | 2             |
| 75226010 | 3000_Vegetables | Peppers, green, cooked, fat not added in cooking                                                                    | 90                 | 4                  | A           | 1             |
| 72128203 | 3000_Vegetables | Turnip greens, cooked, from canned, NS as to fat added in cooking                                                   | 90                 | 4                  | B           | 3             |
| 72128223 | 3000_Vegetables | Turnip greens, cooked, from canned, fat added in cooking, NS as to type of fat                                      | 90                 | 4                  | B           | 3             |
| 75302030 | 3000_Vegetables | Beans, string, green, with chickpeas, cooked, fat not added in cooking                                              | 90                 | 5                  | A           | 1             |
| 72107225 | 3000_Vegetables | Collards, cooked, NS as to form, made with butter                                                                   | 90                 | 4.5                | A           | 2             |
| 72107228 | 3000_Vegetables | Collards, cooked, from fresh, made with butter                                                                      | 90                 | 4.5                | A           | 2             |
| 75340300 | 3000_Vegetables | Pinacbet                                                                                                            | 90                 | 4                  | B           | 2             |
| 75102500 | 3000_Vegetables | Beets, raw                                                                                                          | 90                 | 4.5                | A           | 1             |
| 72119200 | 3000_Vegetables | Kale, cooked, NS as to form, NS as to fat added in cooking                                                          | 90                 | 4                  | B           | 3             |
| 72119201 | 3000_Vegetables | Kale, cooked, from fresh, NS as to fat added in cooking                                                             | 90                 | 4                  | B           | 3             |
| 72119220 | 3000_Vegetables | Kale, cooked, NS as to form, fat added in cooking, NS as to type of fat                                             | 90                 | 4                  | B           | 3             |
| 72119221 | 3000_Vegetables | Kale, cooked, from fresh, fat added in cooking, NS as to type of fat                                                | 90                 | 4                  | B           | 3             |
| 73102217 | 3000_Vegetables | Carrots, cooked, from fresh, made with oil                                                                          | 90                 | 4.5                | A           | 2             |
| 72122200 | 3000_Vegetables | Mustard greens, cooked, NS as to form, NS as to fat added in cooking                                                | 90                 | 4                  | B           | 3             |
| 72201215 | 3000_Vegetables | Broccoli, cooked, NS as to form, made with margarine                                                                | 90                 | 4.5                | A           | 4             |
| 72201228 | 3000_Vegetables | Broccoli, cooked, from frozen, made with margarine                                                                  | 90                 | 4.5                | A           | 4             |
| 72118231 | 3000_Vegetables | Greens, cooked, from frozen, made with butter                                                                       | 90                 | 4.5                | B           | 2             |
| 75232122 | 3000_Vegetables | Seaweed, cooked, made with butter                                                                                   | 90                 | 4.5                | A           | 1             |
| 75201034 | 3000_Vegetables | Artichoke, cooked, from fresh, made with oil                                                                        | 90                 | 5                  | A           | 2             |
| 72132199 | 3000_Vegetables | Bitter melon leaves, horseradish leaves, jute leaves, or radish leaves, cooked, NS as to fat added in cooking       | 90                 | 4                  | C           | 3             |
| 75226050 | 3000_Vegetables | Peppers, red, cooked, fat not added in cooking                                                                      | 90                 | 4                  | A           | 1             |
| 75219039 | 3000_Vegetables | Mushrooms, cooked, from canned, made with oil                                                                       | 90                 | 4                  | B           | 3             |
| 72122201 | 3000_Vegetables | Mustard greens, cooked, from fresh, NS as to fat added in cooking                                                   | 90                 | 4                  | B           | 3             |
| 72122221 | 3000_Vegetables | Mustard greens, cooked, from fresh, fat added in cooking, NS as to type of fat                                      | 90                 | 4                  | B           | 3             |
| 73102214 | 3000_Vegetables | Carrots, cooked, NS as to form, made with oil                                                                       | 90                 | 4.5                | A           | 2             |
| 73102224 | 3000_Vegetables | Carrots, cooked, from frozen, made with oil                                                                         | 90                 | 4.5                | A           | 2             |
| 73102212 | 3000_Vegetables | Carrots, cooked, from frozen, fat not added in cooking                                                              | 90                 | 4.5                | A           | 1             |
| 72128401 | 3000_Vegetables | Turnip greens with roots, cooked, from fresh, NS as to fat added in cooking                                         | 90                 | 4                  | B           | 3             |
| 72128421 | 3000_Vegetables | Turnip greens with roots, cooked, from fresh, fat added in cooking                                                  | 90                 | 4                  | B           | 3             |
| 75218010 | 3000_Vegetables | Kohlrabi, cooked, fat not added in cooking                                                                          | 89                 | 4.5                | A           | 1             |
| 73111224 | 3000_Vegetables | Peas and carrots, cooked, NS as to form, made with oil                                                              | 89                 | 4.5                | A           | 2             |
| 73111227 | 3000_Vegetables | Peas and carrots, cooked, from fresh, made with oil                                                                 | 89                 | 4.5                | A           | 2             |
| 73111230 | 3000_Vegetables | Peas and carrots, cooked, from frozen, made with oil                                                                | 89                 | 4.5                | A           | 2             |
| 75208111 | 3000_Vegetables | Beets, canned, low sodium, made with oil                                                                            | 89                 | 4.5                | A           | 3             |
| 72128234 | 3000_Vegetables | Turnip greens, cooked, from canned, made with butter                                                                | 89                 | 4                  | B           | 2             |
| 75340010 | 3000_Vegetables | Vegetable combinations, Asian style, broccoli, green pepper, water chestnut, etc., cooked, fat not added in cooking | 89                 | 4.5                | A           | 1             |
| 73102210 | 3000_Vegetables | Carrots, cooked, NS as to form, fat not added in cooking                                                            | 89                 | 4.5                | A           | 1             |
| 72107202 | 3000_Vegetables | Collards, cooked, from frozen, NS as to fat added in cooking                                                        | 89                 | 4.5                | B           | 3             |
| 72107222 | 3000_Vegetables | Collards, cooked, from frozen, fat added in cooking, NS as to type of fat                                           | 89                 | 4.5                | B           | 3             |
| 75231022 | 3000_Vegetables | Snowpea, cooked, from frozen, fat added in cooking, NS as to type of fat                                            | 89                 | 5                  | A           | 2             |
| 75206036 | 3000_Vegetables | Beans, string, yellow, cooked, from frozen, made with oil                                                           | 89                 | 4.5                | A           | 1             |
| 75219035 | 3000_Vegetables | Mushrooms, cooked, from fresh, made with margarine                                                                  | 89                 | 4.5                | A           | 4             |
| 75219038 | 3000_Vegetables | Mushrooms, cooked, from frozen, made with margarine                                                                 | 89                 | 4.5                | A           | 4             |
| 75231000 | 3000_Vegetables | Snowpea, cooked, NS as to form, NS as to fat added in cooking                                                       | 89                 | 5                  | A           | 2             |
| 75231020 | 3000_Vegetables | Snowpea, cooked, NS as to form, fat added in cooking, NS as to type of fat                                          | 89                 | 5                  | A           | 2             |

| foodcode | level1nd        | Description                                                                                                        | Food Compass Score | Health Star Rating | Nutri-Score | NOVA Category |
|----------|-----------------|--------------------------------------------------------------------------------------------------------------------|--------------------|--------------------|-------------|---------------|
| 75204960 | 3000_Vegetables | Beans, string, cooked, NS as to form, NS as to color, made with oil                                                | 89                 | 4.5                | A           | 2             |
| 75205041 | 3000_Vegetables | Beans, string, green, cooked, NS as to form, made with oil                                                         | 89                 | 4.5                | A           | 2             |
| 75234033 | 3000_Vegetables | Turnip, cooked, NS as to form, made with oil                                                                       | 89                 | 4                  | B           | 1             |
| 72110200 | 3000_Vegetables | Cress, cooked, NS as to form, NS as to fat added in cooking                                                        | 89                 | 4                  | B           | 3             |
| 72110201 | 3000_Vegetables | Cress, cooked, from fresh, NS as to fat added in cooking                                                           | 89                 | 4                  | B           | 3             |
| 72110203 | 3000_Vegetables | Cress, cooked, from canned, NS as to fat added in cooking                                                          | 89                 | 4                  | B           | 3             |
| 72110202 | 3000_Vegetables | Cress, cooked, NS as to form, fat added in cooking, NS as to type of fat                                           | 89                 | 4                  | B           | 3             |
| 72110221 | 3000_Vegetables | Cress, cooked, from fresh, fat added in cooking, NS as to type of fat                                              | 89                 | 4                  | B           | 3             |
| 72110223 | 3000_Vegetables | Cress, cooked, from canned, fat added in cooking, NS as to type of fat                                             | 89                 | 4                  | B           | 3             |
| 72122203 | 3000_Vegetables | Mustard greens, cooked, from canned, NS as to fat added in cooking                                                 | 89                 | 4                  | B           | 3             |
| 72122223 | 3000_Vegetables | Mustard greens, cooked, from canned, fat added in cooking, NS as to type of fat                                    | 89                 | 4                  | B           | 3             |
| 75201037 | 3000_Vegetables | Artichoke, cooked, from canned, made with oil                                                                      | 89                 | 4.5                | A           | 3             |
| 75202002 | 3000_Vegetables | Asparagus, cooked, from frozen, NS as to fat added in cooking                                                      | 89                 | 4                  | B           | 1             |
| 75206030 | 3000_Vegetables | Beans, string, yellow, cooked, NS as to form, made with oil                                                        | 89                 | 4.5                | A           | 2             |
| 75316022 | 3000_Vegetables | Squash, summer, yellow or green, and onions, cooked, made with oil                                                 | 89                 | 4.5                | B           | 2             |
| 75234030 | 3000_Vegetables | Turnip, cooked, from frozen, made with oil                                                                         | 89                 | 4.5                | A           | 1             |
| 72123040 | 3000_Vegetables | Poke greens, cooked, made with butter                                                                              | 89                 | 4.5                | B           | 2             |
| 74504121 | 3000_Vegetables | Tomato and onion, cooked, made with oil                                                                            | 89                 | 4.5                | B           | 2             |
| 75224131 | 3000_Vegetables | Peas, green, canned, low sodium, made with oil                                                                     | 89                 | 5                  | A           | 2             |
| 72119202 | 3000_Vegetables | Kale, cooked, from frozen, NS as to fat added in cooking                                                           | 89                 | 4                  | B           | 3             |
| 72119222 | 3000_Vegetables | Kale, cooked, from frozen, fat added in cooking, NS as to type of fat                                              | 89                 | 4                  | B           | 3             |
| 75219041 | 3000_Vegetables | Mushrooms, cooked, from canned, made with margarine                                                                | 89                 | 4                  | B           | 3             |
| 75234011 | 3000_Vegetables | Turnip, cooked, from fresh, fat not added in cooking                                                               | 89                 | 4.5                | A           | 1             |
| 75216710 | 3000_Vegetables | Cucumber, cooked, fat not added in cooking                                                                         | 89                 | 4                  | A           | 1             |
| 73102211 | 3000_Vegetables | Carrots, cooked, from fresh, fat not added in cooking                                                              | 88                 | 4.5                | A           | 1             |
| 75201033 | 3000_Vegetables | Artichoke, cooked, NS as to form, made with margarine                                                              | 88                 | 4.5                | A           | 1             |
| 75201042 | 3000_Vegetables | Artichoke, cooked, from frozen, made with margarine                                                                | 88                 | 4.5                | A           | 1             |
| 72110231 | 3000_Vegetables | Cress, cooked, NS as to form, made with butter                                                                     | 88                 | 4                  | B           | 2             |
| 72110234 | 3000_Vegetables | Cress, cooked, from fresh, made with butter                                                                        | 88                 | 4                  | B           | 2             |
| 72110237 | 3000_Vegetables | Cress, cooked, from canned, made with butter                                                                       | 88                 | 4                  | B           | 2             |
| 75204963 | 3000_Vegetables | Beans, string, cooked, from fresh, NS as to color, made with oil                                                   | 88                 | 4.5                | A           | 2             |
| 75205044 | 3000_Vegetables | Beans, string, green, cooked, from fresh, made with oil                                                            | 88                 | 4.5                | A           | 2             |
| 75204966 | 3000_Vegetables | Beans, string, cooked, from frozen, NS as to color, made with oil                                                  | 88                 | 4.5                | A           | 2             |
| 75205047 | 3000_Vegetables | Beans, string, green, cooked, from frozen, made with oil                                                           | 88                 | 4.5                | A           | 2             |
| 75503010 | 3000_Vegetables | Cucumber pickles, dill                                                                                             | 88                 | 3.5                | B           | 4             |
| 75206032 | 3000_Vegetables | Beans, string, yellow, cooked, NS as to form, made with margarine                                                  | 88                 | 4.5                | A           | 1             |
| 75230020 | 3000_Vegetables | Sauerkraut, cooked, fat added in cooking                                                                           | 88                 | 4                  | B           | 3             |
| 75231012 | 3000_Vegetables | Snowpea, cooked, from frozen, fat not added in cooking                                                             | 88                 | 5                  | A           | 1             |
| 75234032 | 3000_Vegetables | Turnip, cooked, from frozen, made with margarine                                                                   | 88                 | 4                  | B           | 1             |
| 75234035 | 3000_Vegetables | Turnip, cooked, NS as to form, made with margarine                                                                 | 88                 | 4                  | B           | 1             |
| 75220001 | 3000_Vegetables | Okra, cooked, from fresh, NS as to fat added in cooking                                                            | 88                 | 4.5                | A           | 3             |
| 75220021 | 3000_Vegetables | Okra, cooked, from fresh, fat added in cooking, NS as to type of fat                                               | 88                 | 4.5                | A           | 3             |
| 75231010 | 3000_Vegetables | Snowpea, cooked, NS as to form, fat not added in cooking                                                           | 88                 | 5                  | A           | 1             |
| 72113200 | 3000_Vegetables | Dandelion greens, cooked, NS as to fat added in cooking                                                            | 87                 | 4                  | B           | 3             |
| 72113220 | 3000_Vegetables | Dandelion greens, cooked, fat added in cooking, NS as to type of fat                                               | 87                 | 4                  | B           | 3             |
| 72119203 | 3000_Vegetables | Kale, cooked, from canned, NS as to fat added in cooking                                                           | 87                 | 4                  | B           | 3             |
| 72119223 | 3000_Vegetables | Kale, cooked, from canned, fat added in cooking, NS as to type of fat                                              | 87                 | 4                  | B           | 3             |
| 75311030 | 3000_Vegetables | Mixed vegetables, cooked, from canned, made with oil                                                               | 87                 | 4.5                | A           | 3             |
| 75201036 | 3000_Vegetables | Artichoke, cooked, from fresh, made with margarine                                                                 | 87                 | 5                  | A           | 1             |
| 75234027 | 3000_Vegetables | Turnip, cooked, from fresh, made with oil                                                                          | 87                 | 4.5                | A           | 2             |
| 75228010 | 3000_Vegetables | Rutabaga, cooked, fat not added in cooking                                                                         | 87                 | 4.5                | A           | 1             |
| 75206038 | 3000_Vegetables | Beans, string, yellow, cooked, from frozen, made with margarine                                                    | 87                 | 4.5                | A           | 1             |
| 75204968 | 3000_Vegetables | Beans, string, cooked, from frozen, NS as to color, made with margarine                                            | 87                 | 4.5                | A           | 1             |
| 75220003 | 3000_Vegetables | Okra, cooked, from canned, NS as to fat added in cooking                                                           | 87                 | 4.5                | A           | 3             |
| 75220023 | 3000_Vegetables | Okra, cooked, from canned, fat added in cooking, NS as to type of fat                                              | 87                 | 4.5                | A           | 3             |
| 75207021 | 3000_Vegetables | Bean sprouts, cooked, from fresh, fat added in cooking                                                             | 87                 | 4.5                | B           | 2             |
| 75207000 | 3000_Vegetables | Bean sprouts, cooked, NS as to form, NS as to fat added in cooking                                                 | 87                 | 4.5                | B           | 2             |
| 75207001 | 3000_Vegetables | Bean sprouts, cooked, from fresh, NS as to fat added in cooking                                                    | 87                 | 4.5                | B           | 2             |
| 75207020 | 3000_Vegetables | Bean sprouts, cooked, NS as to form, fat added in cooking                                                          | 87                 | 4.5                | B           | 2             |
| 75208110 | 3000_Vegetables | Beets, canned, low sodium, fat not added in cooking                                                                | 87                 | 4.5                | A           | 1             |
| 75228021 | 3000_Vegetables | Rutabaga, cooked, made with oil                                                                                    | 87                 | 4.5                | B           | 2             |
| 75206041 | 3000_Vegetables | Beans, string, yellow, cooked, from canned, made with margarine                                                    | 87                 | 4                  | B           | 3             |
| 72107231 | 3000_Vegetables | Collards, cooked, from frozen, made with butter                                                                    | 86                 | 4.5                | B           | 2             |
| 75201010 | 3000_Vegetables | Artichoke, cooked, NS as to form, fat not added in cooking                                                         | 86                 | 4.5                | A           | 1             |
| 75201012 | 3000_Vegetables | Artichoke, cooked, from frozen, fat not added in cooking                                                           | 86                 | 4.5                | A           | 1             |
| 75201013 | 3000_Vegetables | Artichoke, cooked, from canned, fat not added in cooking                                                           | 86                 | 4.5                | A           | 1             |
| 75202028 | 3000_Vegetables | Asparagus, cooked, from fresh, made with butter                                                                    | 86                 | 4.5                | A           | 2             |
| 72122225 | 3000_Vegetables | Mustard greens, cooked, NS as to form, made with butter                                                            | 86                 | 4                  | B           | 2             |
| 72122228 | 3000_Vegetables | Mustard greens, cooked, from fresh, made with butter                                                               | 86                 | 4                  | B           | 2             |
| 75302045 | 3000_Vegetables | Beans, string, green, with almonds, cooked, fat added in cooking, NS as to type of fat                             | 86                 | 4.5                | A           | 3             |
| 75219003 | 3000_Vegetables | Mushrooms, cooked, from canned, NS as to fat added in cooking                                                      | 86                 | 4                  | B           | 3             |
| 75219023 | 3000_Vegetables | Mushrooms, cooked, from canned, fat added in cooking, NS as to type of fat                                         | 86                 | 4                  | B           | 3             |
| 75234013 | 3000_Vegetables | Turnip, cooked, from canned, fat not added in cooking                                                              | 86                 | 4.5                | A           | 3             |
| 72113240 | 3000_Vegetables | Dandelion greens, cooked, made with butter                                                                         | 86                 | 4                  | B           | 2             |
| 72107203 | 3000_Vegetables | Collards, cooked, from canned, NS as to fat added in cooking                                                       | 86                 | 4.5                | A           | 3             |
| 72107223 | 3000_Vegetables | Collards, cooked, from canned, fat added in cooking, NS as to type of fat                                          | 86                 | 4.5                | A           | 3             |
| 75201039 | 3000_Vegetables | Artichoke, cooked, from canned, made with margarine                                                                | 86                 | 4.5                | A           | 3             |
| 75226063 | 3000_Vegetables | Peppers, red, cooked, made with margarine                                                                          | 86                 | 4                  | B           | 1             |
| 75233029 | 3000_Vegetables | Squash, summer, yellow or green, cooked, from fresh, made with margarine                                           | 86                 | 4.5                | B           | 4             |
| 72116150 | 3000_Vegetables | Caesar salad, with romaine, no dressing                                                                            | 86                 | 4.5                | A           | 3             |
| 72132201 | 3000_Vegetables | Bitter melon leaves, horseradish leaves, jute leaves, or radish leaves, cooked, fat added in cooking               | 85                 | 4                  | C           | 3             |
| 75234024 | 3000_Vegetables | Turnip, cooked, from canned, made with oil                                                                         | 85                 | 4.5                | A           | 3             |
| 73103000 | 3000_Vegetables | Carrots, canned, low sodium, NS as to fat added in cooking                                                         | 85                 | 4.5                | A           | 3             |
| 73103020 | 3000_Vegetables | Carrots, canned, low sodium, fat added in cooking, NS as to type of fat                                            | 85                 | 4.5                | A           | 3             |
| 75302047 | 3000_Vegetables | Beans, string, green, with almonds, cooked, made with butter                                                       | 85                 | 4.5                | A           | 2             |
| 72122234 | 3000_Vegetables | Mustard greens, cooked, from canned, made with butter                                                              | 85                 | 4                  | B           | 2             |
| 75206039 | 3000_Vegetables | Beans, string, yellow, cooked, from canned, made with oil                                                          | 85                 | 4                  | B           | 3             |
| 74505021 | 3000_Vegetables | Tomato with corn and okra, cooked, made with oil                                                                   | 85                 | 4.5                | B           | 3             |
| 75202025 | 3000_Vegetables | Asparagus, cooked, NS as to form, made with butter                                                                 | 85                 | 4.5                | A           | 2             |
| 75202032 | 3000_Vegetables | Asparagus, cooked, from frozen, made with butter                                                                   | 85                 | 4.5                | A           | 2             |
| 75215510 | 3000_Vegetables | Christophine, cooked, fat not added in cooking                                                                     | 85                 | 4.5                | A           | 1             |
| 75202035 | 3000_Vegetables | Asparagus, cooked, from canned, made with butter                                                                   | 85                 | 4                  | B           | 3             |
| 75503110 | 3000_Vegetables | Cucumber pickles, dill, reduced salt                                                                               | 85                 | 4.5                | A           | 4             |
| 75234029 | 3000_Vegetables | Turnip, cooked, from fresh, made with margarine                                                                    | 85                 | 4                  | B           | 1             |
| 75214002 | 3000_Vegetables | Caiflower, cooked, from frozen, NS as to fat added in cooking                                                      | 85                 | 4.5                | A           | 1             |
| 75330123 | 3000_Vegetables | Vegetable combination, including carrots, broccoli, and/or dark-green leafy; cooked, no sauce, made with margarine | 85                 | 4.5                | A           | 4             |
| 75204969 | 3000_Vegetables | Beans, string, cooked, from canned, NS as to color, made with oil                                                  | 84                 | 4                  | B           | 2             |
| 75205050 | 3000_Vegetables | Beans, string, green, cooked, from canned, made with oil                                                           | 84                 | 4                  | B           | 2             |
| 75208113 | 3000_Vegetables | Beets, canned, low sodium, made with margarine                                                                     | 84                 | 4.5                | A           | 3             |
| 73112111 | 3000_Vegetables | Peas and carrots, cooked, from fresh, fat not added in cooking                                                     | 84                 | 4.5                | A           | 1             |
| 72203090 | 3000_Vegetables | Broccoli, chinese, cooked, NS as to form, made with butter                                                         | 84                 | 4                  | C           | 2             |
| 72203130 | 3000_Vegetables | Broccoli, chinese, cooked, from fresh, made with butter                                                            | 84                 | 4                  | C           | 2             |
| 72203170 | 3000_Vegetables | Broccoli, chinese, cooked, from frozen, made with butter                                                           | 84                 | 4                  | C           | 2             |
| 72119225 | 3000_Vegetables | Kale, cooked, NS as to form, made with butter                                                                      | 84                 | 4                  | B           | 2             |

| foodcode | level1nd        | Description                                                                                                   | Food Compass Score | Health Star Rating | Nutri-Score | NOVA Category |
|----------|-----------------|---------------------------------------------------------------------------------------------------------------|--------------------|--------------------|-------------|---------------|
| 74505010 | 3000_Vegetables | Tomato with corn and okra, cooked, fat not added in cooking                                                   | 84                 | 4.5                | B           | 3             |
| 75201011 | 3000_Vegetables | Artichoke, cooked, from fresh, fat not added in cooking                                                       | 84                 | 5                  | A           | 1             |
| 75205110 | 3000_Vegetables | Beans, string, green, canned, low sodium, NS as to fat added in cooking                                       | 84                 | 4.5                | A           | 3             |
| 75205130 | 3000_Vegetables | Beans, string, green, canned, low sodium, fat added in cooking, NS as to type of fat                          | 84                 | 4.5                | A           | 3             |
| 74504000 | 3000_Vegetables | Tomato and okra, cooked, NS as to fat added in cooking                                                        | 83                 | 4.5                | B           | 3             |
| 74504020 | 3000_Vegetables | Tomato and okra, cooked, fat added in cooking, NS as to type of fat                                           | 83                 | 4.5                | B           | 3             |
| 75217299 | 3000_Vegetables | Flowers or blossoms of sesbania, squash, or lily, NS as to fat added in cooking                               | 83                 | 4                  | A           | 1             |
| 75316031 | 3000_Vegetables | Squash, summer, yellow or green, with tomato sauce, cooked, fat added in cooking                              | 83                 | 4.5                | B           | 3             |
| 75316032 | 3000_Vegetables | Squash, summer, yellow or green, with tomato sauce, cooked, NS as to fat added in cooking                     | 83                 | 4.5                | B           | 3             |
| 72107234 | 3000_Vegetables | Collards, cooked, from canned, made with butter                                                               | 83                 | 4.5                | B           | 2             |
| 75209032 | 3000_Vegetables | Brussels sprouts, cooked, NS as to form, made with margarine                                                  | 83                 | 5                  | A           | 4             |
| 75209052 | 3000_Vegetables | Brussels sprouts, cooked, from frozen, made with margarine                                                    | 83                 | 5                  | A           | 4             |
| 75220033 | 3000_Vegetables | Okra, cooked, from frozen, made with margarine                                                                | 83                 | 4.5                | A           | 4             |
| 75228023 | 3000_Vegetables | Rutabaga, cooked, made with margarine                                                                         | 83                 | 4.5                | A           | 1             |
| 73201026 | 3000_Vegetables | Pumpkin, cooked, NS as to form, made with margarine                                                           | 83                 | 4.5                | A           | 4             |
| 73201029 | 3000_Vegetables | Pumpkin, cooked, from fresh, made with margarine                                                              | 83                 | 4.5                | A           | 4             |
| 73201032 | 3000_Vegetables | Pumpkin, cooked, from frozen, made with margarine                                                             | 83                 | 4.5                | A           | 4             |
| 75100750 | 3000_Vegetables | Artichoke, Jerusalem, raw                                                                                     | 83                 | 4.5                | A           | 1             |
| 72128403 | 3000_Vegetables | Turnip greens with roots, cooked, from canned, NS as to fat added in cooking                                  | 83                 | 4                  | B           | 3             |
| 72128423 | 3000_Vegetables | Turnip greens with roots, cooked, from canned, fat added in cooking                                           | 83                 | 4                  | B           | 3             |
| 75214029 | 3000_Vegetables | Cauliflower, cooked, from fresh, made with margarine                                                          | 83                 | 4.5                | A           | 4             |
| 72119228 | 3000_Vegetables | Kale, cooked, from fresh, made with butter                                                                    | 83                 | 4                  | B           | 2             |
| 75345000 | 3000_Vegetables | Tsukemono, Japanese pickles                                                                                   | 82                 | 4                  | B           | 4             |
| 73403021 | 3000_Vegetables | Sweet potato, baked, peel not eaten, made with oil                                                            | 82                 | 4.5                | A           | 2             |
| 73410340 | 3000_Vegetables | Sweet potato fries, from fresh, baked                                                                         | 82                 | 4.5                | B           | 2             |
| 75208720 | 3000_Vegetables | Broccoflower, cooked, fat added in cooking, NS as to type of fat                                              | 82                 | 4.5                | A           | 1             |
| 75209021 | 3000_Vegetables | Brussels sprouts, cooked, from fresh, fat added in cooking, NS as to type of fat                              | 82                 | 4.5                | A           | 3             |
| 75214000 | 3000_Vegetables | Cauliflower, cooked, NS as to form, NS as to fat added in cooking                                             | 82                 | 4.5                | A           | 3             |
| 75214020 | 3000_Vegetables | Cauliflower, cooked, NS as to form, fat added in cooking, NS as to type of fat                                | 82                 | 4.5                | A           | 3             |
| 75214022 | 3000_Vegetables | Cauliflower, cooked, from frozen, fat added in cooking, NS as to type of fat                                  | 82                 | 4.5                | A           | 3             |
| 75209001 | 3000_Vegetables | Brussels sprouts, cooked, from fresh, NS as to fat added in cooking                                           | 82                 | 4.5                | B           | 3             |
| 75234026 | 3000_Vegetables | Turnip, cooked, from canned, made with margarine                                                              | 82                 | 4.5                | A           | 3             |
| 75224043 | 3000_Vegetables | Peas, green, cooked, from fresh, made with oil                                                                | 82                 | 5                  | A           | 2             |
| 75302211 | 3000_Vegetables | Beans, string, green, with onions, cooked, made with oil                                                      | 82                 | 4.5                | A           | 2             |
| 73402021 | 3000_Vegetables | Sweet potato, baked, peel eaten, made with oil                                                                | 82                 | 4.5                | A           | 2             |
| 75220002 | 3000_Vegetables | Okra, cooked, from frozen, NS as to fat added in cooking                                                      | 82                 | 4.5                | A           | 1             |
| 72119231 | 3000_Vegetables | Kale, cooked, from frozen, made with butter                                                                   | 81                 | 4                  | B           | 2             |
| 72116222 | 3000_Vegetables | Escarole, cooked, made with butter                                                                            | 81                 | 4                  | B           | 2             |
| 75224133 | 3000_Vegetables | Peas, green, canned, low sodium, made with margarine                                                          | 81                 | 5                  | A           | 3             |
| 72201224 | 3000_Vegetables | Broccoli, cooked, from fresh, made with butter                                                                | 81                 | 4.5                | A           | 2             |
| 73111233 | 3000_Vegetables | Peas and carrots, cooked, from canned, made with oil                                                          | 81                 | 4.5                | A           | 3             |
| 75217301 | 3000_Vegetables | Flowers or blossoms of sesbania, squash, or lily, fat added in cooking                                        | 81                 | 4                  | A           | 3             |
| 75230000 | 3000_Vegetables | Sauerkraut, cooked, NS as to fat added in cooking                                                             | 81                 | 4                  | C           | 3             |
| 73103022 | 3000_Vegetables | Carrots, canned, low sodium, made with butter                                                                 | 81                 | 4.5                | A           | 2             |
| 75216723 | 3000_Vegetables | Cucumber, cooked, made with margarine                                                                         | 81                 | 4                  | B           | 1             |
| 75209020 | 3000_Vegetables | Brussels sprouts, cooked, NS as to form, fat added in cooking, NS as to type of fat                           | 81                 | 4.5                | A           | 1             |
| 75211033 | 3000_Vegetables | Cabbage, green, cooked, made with margarine                                                                   | 81                 | 4                  | B           | 4             |
| 75515000 | 3000_Vegetables | Vegetables, pickled, Hawaiian style                                                                           | 81                 | 3.5                | C           | 3             |
| 75111800 | 3000_Vegetables | Jicama, raw                                                                                                   | 81                 | 5                  | A           | 1             |
| 75216721 | 3000_Vegetables | Cucumber, cooked, made with oil                                                                               | 80                 | 4                  | C           | 3             |
| 75220028 | 3000_Vegetables | Okra, cooked, from fresh, made with butter                                                                    | 80                 | 4.5                | A           | 2             |
| 75315216 | 3000_Vegetables | Peas and mushrooms, cooked, made with oil                                                                     | 80                 | 4.5                | A           | 2             |
| 74504148 | 3000_Vegetables | Tomato and celery, cooked, NS as to fat added in cooking                                                      | 80                 | 4                  | B           | 3             |
| 75217010 | 3000_Vegetables | Eggplant, cooked, fat not added in cooking                                                                    | 80                 | 4                  | A           | 1             |
| 75143350 | 3000_Vegetables | Lettuce, salad with egg, cheese, tomato, and/or carrots, with or without other vegetables, no dressing        | 80                 | 4.5                | B           | 2             |
| 72119234 | 3000_Vegetables | Kale, cooked, from canned, made with butter                                                                   | 80                 | 4                  | B           | 2             |
| 75219100 | 3000_Vegetables | Mushroom, Asian, cooked, from dried                                                                           | 80                 | 4.5                | A           | 1             |
| 75302205 | 3000_Vegetables | Beans, string, green, with onions, cooked, fat not added in cooking                                           | 80                 | 4.5                | A           | 1             |
| 75317011 | 3000_Vegetables | Vegetables, stew type, cooked, made with oil                                                                  | 80                 | 4.5                | A           | 2             |
| 75208740 | 3000_Vegetables | Broccoflower, cooked, made with butter                                                                        | 80                 | 4.5                | A           | 1             |
| 75219000 | 3000_Vegetables | Mushrooms, cooked, NS as to form, NS as to fat added in cooking                                               | 80                 | 4.5                | A           | 3             |
| 75219001 | 3000_Vegetables | Mushrooms, cooked, from fresh, NS as to fat added in cooking                                                  | 80                 | 4.5                | A           | 3             |
| 75219002 | 3000_Vegetables | Mushrooms, cooked, from frozen, NS as to fat added in cooking                                                 | 80                 | 4.5                | A           | 3             |
| 75219020 | 3000_Vegetables | Mushrooms, cooked, NS as to form, fat added in cooking, NS as to type of fat                                  | 80                 | 4.5                | A           | 3             |
| 75219021 | 3000_Vegetables | Mushrooms, cooked, from fresh, fat added in cooking, NS as to type of fat                                     | 80                 | 4.5                | A           | 3             |
| 75219022 | 3000_Vegetables | Mushrooms, cooked, from frozen, fat added in cooking, NS as to type of fat                                    | 80                 | 4.5                | A           | 3             |
| 75307001 | 3000_Vegetables | Green peppers and onions, cooked, made with oil                                                               | 80                 | 4.5                | B           | 2             |
| 72133199 | 3000_Vegetables | Sweet potato leaves, squash leaves, pumpkin leaves, chrysanthemum leaves, bean leaves, or swamp cabbage, cool | 80                 | 3.5                | C           | 3             |
| 72133201 | 3000_Vegetables | Sweet potato leaves, squash leaves, pumpkin leaves, chrysanthemum leaves, bean leaves, or swamp cabbage, cool | 80                 | 3.5                | C           | 3             |
| 72201201 | 3000_Vegetables | Broccoli, cooked, from fresh, NS as to fat added in cooking                                                   | 80                 | 4.5                | A           | 3             |
| 72201221 | 3000_Vegetables | Broccoli, cooked, from fresh, fat added in cooking, NS as to type of fat                                      | 80                 | 4.5                | A           | 3             |
| 75221061 | 3000_Vegetables | Onions, green, cooked, from fresh, fat added in cooking                                                       | 80                 | 4.5                | A           | 4             |
| 72201214 | 3000_Vegetables | Broccoli, cooked, NS as to form, made with butter                                                             | 80                 | 4.5                | A           | 2             |
| 72201227 | 3000_Vegetables | Broccoli, cooked, from frozen, made with butter                                                               | 80                 | 4.5                | A           | 2             |
| 72201200 | 3000_Vegetables | Broccoli, cooked, NS as to form, NS as to fat added in cooking                                                | 79                 | 4.5                | A           | 3             |
| 72201220 | 3000_Vegetables | Broccoli, cooked, NS as to form, fat added in cooking, NS as to type of fat                                   | 79                 | 4.5                | A           | 3             |
| 75224045 | 3000_Vegetables | Peas, green, cooked, from fresh, made with margarine                                                          | 79                 | 5                  | A           | 1             |
| 75200121 | 3000_Vegetables | Vegetables, NS as to type, cooked, made with oil                                                              | 79                 | 4.5                | A           | 2             |
| 75311024 | 3000_Vegetables | Mixed vegetables, cooked, NS as to form, made with oil                                                        | 79                 | 4.5                | A           | 2             |
| 75311027 | 3000_Vegetables | Mixed vegetables, cooked, from frozen, made with oil                                                          | 79                 | 4.5                | A           | 2             |
| 72201202 | 3000_Vegetables | Broccoli, cooked, from frozen, NS as to fat added in cooking                                                  | 79                 | 4.5                | A           | 3             |
| 72201222 | 3000_Vegetables | Broccoli, cooked, from frozen, fat added in cooking, NS as to type of fat                                     | 79                 | 4.5                | A           | 3             |
| 75219037 | 3000_Vegetables | Mushrooms, cooked, from frozen, made with butter                                                              | 79                 | 4.5                | A           | 1             |
| 75220000 | 3000_Vegetables | Okra, cooked, NS as to form, NS as to fat added in cooking                                                    | 79                 | 4.5                | A           | 3             |
| 75220020 | 3000_Vegetables | Okra, cooked, NS as to form, fat added in cooking, NS as to type of fat                                       | 79                 | 4.5                | A           | 3             |
| 75220022 | 3000_Vegetables | Okra, cooked, from frozen, fat added in cooking, NS as to type of fat                                         | 79                 | 4.5                | A           | 3             |
| 75502510 | 3000_Vegetables | Cabbage, red, pickled                                                                                         | 79                 | 4.5                | A           | 3             |
| 73201035 | 3000_Vegetables | Pumpkin, cooked, from canned, made with margarine                                                             | 79                 | 4.5                | A           | 4             |
| 74504022 | 3000_Vegetables | Tomato and okra, cooked, made with butter                                                                     | 79                 | 4                  | B           | 2             |
| 75311100 | 3000_Vegetables | Mixed vegetables, canned, low sodium, NS as to fat added in cooking                                           | 79                 | 5                  | A           | 3             |
| 75311120 | 3000_Vegetables | Mixed vegetables, canned, low sodium, fat added in cooking, NS as to type of fat                              | 79                 | 5                  | A           | 3             |
| 73111210 | 3000_Vegetables | Peas and carrots, cooked, NS as to form, fat not added in cooking                                             | 78                 | 4.5                | A           | 1             |
| 73111212 | 3000_Vegetables | Peas and carrots, cooked, from frozen, fat not added in cooking                                               | 78                 | 4.5                | A           | 1             |
| 75224021 | 3000_Vegetables | Peas, green, cooked, from fresh, fat not added in cooking                                                     | 78                 | 5                  | A           | 1             |
| 75302009 | 3000_Vegetables | Beans, string, green, with tomatoes, cooked, NS as to fat added in cooking                                    | 78                 | 4.5                | A           | 3             |
| 75302011 | 3000_Vegetables | Beans, string, green, with tomatoes, cooked, fat added in cooking                                             | 78                 | 4.5                | A           | 3             |
| 75209041 | 3000_Vegetables | Brussels sprouts, cooked, from fresh, made with butter                                                        | 78                 | 4.5                | B           | 2             |
| 73402010 | 3000_Vegetables | Sweet potato, baked, peel eaten, fat not added in cooking                                                     | 78                 | 4.5                | A           | 1             |
| 75220035 | 3000_Vegetables | Okra, cooked, from canned, made with butter                                                                   | 78                 | 4.5                | A           | 3             |
| 75208121 | 3000_Vegetables | Beets, cooked, NS as to form, made with oil                                                                   | 78                 | 4                  | B           | 1             |
| 75208127 | 3000_Vegetables | Beets, cooked, from frozen, made with oil                                                                     | 78                 | 4                  | B           | 1             |
| 75302213 | 3000_Vegetables | Beans, string, green, with onions, cooked, made with margarine                                                | 78                 | 4.5                | A           | 1             |
| 73403010 | 3000_Vegetables | Sweet potato, baked, peel not eaten, fat not added in cooking                                                 | 78                 | 4.5                | A           | 1             |
| 75213100 | 3000_Vegetables | Cactus, cooked, NS as to fat added in cooking                                                                 | 78                 | 4                  | B           | 3             |

| foodcode | level1nd        | Description                                                                                                          | Food Compass Score | Health Star Rating | Nutri-Score | NOVA Category |
|----------|-----------------|----------------------------------------------------------------------------------------------------------------------|--------------------|--------------------|-------------|---------------|
| 75213120 | 3000_Vegetables | Cactus, cooked, fat added in cooking, NS as to type of fat                                                           | 78                 | 4                  | B           | 3             |
| 75209000 | 3000_Vegetables | Brussels sprouts, cooked, NS as to form, NS as to fat added in cooking                                               | 78                 | 4.5                | A           | 3             |
| 75213000 | 3000_Vegetables | Cabbage, savoy, cooked, NS as to fat added in cooking                                                                | 78                 | 4.5                | A           | 1             |
| 75213020 | 3000_Vegetables | Cabbage, savoy, cooked, fat added in cooking, NS as to type of fat                                                   | 78                 | 4.5                | A           | 1             |
| 75214025 | 3000_Vegetables | Caiflower, cooked, NS as to form, made with butter                                                                   | 78                 | 4.5                | A           | 2             |
| 75214031 | 3000_Vegetables | Caiflower, cooked, from frozen, made with butter                                                                     | 78                 | 4.5                | A           | 2             |
| 75219031 | 3000_Vegetables | Mushrooms, cooked, NS as to form, made with butter                                                                   | 78                 | 4.5                | A           | 2             |
| 75219034 | 3000_Vegetables | Mushrooms, cooked, from fresh, made with butter                                                                      | 78                 | 4.5                | A           | 2             |
| 73210010 | 3000_Vegetables | Calabaza, cooked                                                                                                     | 78                 | 4.5                | A           | 3             |
| 73102229 | 3000_Vegetables | Carrots, cooked, from canned, made with margarine                                                                    | 77                 | 4                  | B           | 4             |
| 75217021 | 3000_Vegetables | Eggplant, cooked, made with oil                                                                                      | 77                 | 4                  | B           | 2             |
| 75208700 | 3000_Vegetables | Broccoflower, cooked, NS as to fat added in cooking                                                                  | 77                 | 4.5                | A           | 1             |
| 73402023 | 3000_Vegetables | Sweet potato, baked, peel eaten, made with margarine                                                                 | 77                 | 4.5                | A           | 1             |
| 75209002 | 3000_Vegetables | Brussels sprouts, cooked, from frozen, NS as to fat added in cooking                                                 | 77                 | 4.5                | A           | 3             |
| 75209022 | 3000_Vegetables | Brussels sprouts, cooked, from frozen, fat added in cooking, NS as to type of fat                                    | 77                 | 4.5                | A           | 3             |
| 75205132 | 3000_Vegetables | Beans, string, green, canned, low sodium, made with butter                                                           | 77                 | 4.5                | A           | 2             |
| 75208124 | 3000_Vegetables | Beets, cooked, from fresh, made with oil                                                                             | 77                 | 4                  | B           | 2             |
| 75311013 | 3000_Vegetables | Mixed vegetables, cooked, from canned, fat not added in cooking                                                      | 77                 | 4.5                | A           | 3             |
| 75214003 | 3000_Vegetables | Caiflower, cooked, from canned, NS as to fat added in cooking                                                        | 77                 | 4.5                | A           | 3             |
| 75315218 | 3000_Vegetables | Peas and mushrooms, cooked, made with margarine                                                                      | 77                 | 5                  | A           | 1             |
| 74504149 | 3000_Vegetables | Tomato and celery, cooked, fat added in cooking                                                                      | 77                 | 4                  | B           | 3             |
| 75302059 | 3000_Vegetables | Beans, string, green, with pinto beans, cooked, NS as to fat added in cooking                                        | 76                 | 4.5                | A           | 1             |
| 75302061 | 3000_Vegetables | Beans, string, green, with pinto beans, cooked, fat added in cooking                                                 | 76                 | 4.5                | A           | 1             |
| 75204971 | 3000_Vegetables | Beans, string, cooked, from canned, NS as to color, made with margarine                                              | 76                 | 4                  | B           | 4             |
| 75330120 | 3000_Vegetables | Vegetable combination, including carrots, broccoli, and/or dark-green leafy; cooked, no sauce, fat added in cooking  | 76                 | 4                  | B           | 3             |
| 75311122 | 3000_Vegetables | Mixed vegetables, canned, low sodium, made with butter                                                               | 76                 | 4.5                | A           | 3             |
| 73410330 | 3000_Vegetables | Sweet potato fries, from fresh, fried                                                                                | 76                 | 4.5                | B           | 2             |
| 75315249 | 3000_Vegetables | Cowpeas with snap beans, cooked, NS as to fat added in cooking                                                       | 76                 | 4.5                | A           | 1             |
| 75330100 | 3000_Vegetables | Vegetable combination, including carrots, broccoli, and/or dark-green leafy; cooked, no sauce, NS as to fat added in | 76                 | 4                  | B           | 3             |
| 75317013 | 3000_Vegetables | Vegetables, stew type, cooked, made with margarine                                                                   | 76                 | 4.5                | B           | 1             |
| 75221014 | 3000_Vegetables | Onions, cooked, NS as to form, made with oil                                                                         | 76                 | 4.5                | A           | 2             |
| 73410200 | 3000_Vegetables | Sweet potato fries, NFS                                                                                              | 76                 | 4.5                | B           | 3             |
| 73410300 | 3000_Vegetables | Sweet potato fries, NS as to fresh or frozen                                                                         | 76                 | 4.5                | B           | 3             |
| 73405021 | 3000_Vegetables | Sweet potato, boiled, made with oil                                                                                  | 76                 | 4.5                | B           | 2             |
| 75217023 | 3000_Vegetables | Eggplant, cooked, made with margarine                                                                                | 76                 | 4                  | B           | 1             |
| 75233221 | 3000_Vegetables | Squash, spaghetti, cooked, made with oil                                                                             | 76                 | 4.5                | B           | 1             |
| 75233220 | 3000_Vegetables | Squash, spaghetti, cooked, fat not added in cooking                                                                  | 76                 | 4.5                | A           | 1             |
| 75205052 | 3000_Vegetables | Beans, string, green, cooked, from canned, made with margarine                                                       | 76                 | 4                  | B           | 4             |
| 75330151 | 3000_Vegetables | Vegetable combination, excluding carrots, broccoli, and dark-green leafy; cooked, no sauce, made with oil            | 75                 | 4.5                | A           | 2             |
| 73201000 | 3000_Vegetables | Pumpkin, cooked, NS as to form, NS as to fat added in cooking                                                        | 75                 | 4.5                | B           | 3             |
| 73201020 | 3000_Vegetables | Pumpkin, cooked, NS as to form, fat added in cooking, NS as to type of fat                                           | 75                 | 4.5                | B           | 3             |
| 75200123 | 3000_Vegetables | Vegetables, NS as to type, cooked, made with margarine                                                               | 75                 | 5                  | A           | 1             |
| 75231025 | 3000_Vegetables | Snowpea, cooked, NS as to form, made with margarine                                                                  | 75                 | 5                  | A           | 4             |
| 75231031 | 3000_Vegetables | Snowpea, cooked, from frozen, made with margarine                                                                    | 75                 | 5                  | A           | 4             |
| 75213022 | 3000_Vegetables | Cabbage, savoy, cooked, made with butter                                                                             | 75                 | 4.5                | A           | 1             |
| 75143200 | 3000_Vegetables | Lettuce, salad with cheese, tomato and/or carrots, with or without other vegetables, no dressing                     | 75                 | 4.5                | B           | 2             |
| 75221023 | 3000_Vegetables | Onions, cooked, from frozen, made with oil                                                                           | 75                 | 4.5                | B           | 2             |
| 75208130 | 3000_Vegetables | Beets, cooked, from canned, made with oil                                                                            | 75                 | 4                  | C           | 3             |
| 75209031 | 3000_Vegetables | Brussels sprouts, cooked, NS as to form, made with butter                                                            | 75                 | 4.5                | A           | 2             |
| 75209051 | 3000_Vegetables | Brussels sprouts, cooked, from frozen, made with butter                                                              | 75                 | 4.5                | A           | 2             |
| 73201001 | 3000_Vegetables | Pumpkin, cooked, from fresh, NS as to fat added in cooking                                                           | 75                 | 4.5                | B           | 3             |
| 73201002 | 3000_Vegetables | Pumpkin, cooked, from frozen, NS as to fat added in cooking                                                          | 75                 | 4.5                | B           | 3             |
| 73201021 | 3000_Vegetables | Pumpkin, cooked, from fresh, fat added in cooking, NS as to type of fat                                              | 75                 | 4.5                | B           | 3             |
| 73201022 | 3000_Vegetables | Pumpkin, cooked, from frozen, fat added in cooking, NS as to type of fat                                             | 75                 | 4.5                | B           | 3             |
| 75218499 | 3000_Vegetables | Lotus root, cooked, NS as to fat added in cooking                                                                    | 75                 | 4.5                | B           | 2             |
| 73102216 | 3000_Vegetables | Carrots, cooked, NS as to form, made with margarine                                                                  | 75                 | 4.5                | A           | 4             |
| 73102226 | 3000_Vegetables | Carrots, cooked, from frozen, made with margarine                                                                    | 75                 | 4.5                | A           | 4             |
| 75215000 | 3000_Vegetables | Celery, cooked, NS as to fat added in cooking                                                                        | 75                 | 4                  | B           | 3             |
| 75215020 | 3000_Vegetables | Celery, cooked, fat added in cooking, NS as to type of fat                                                           | 75                 | 4                  | B           | 3             |
| 75204962 | 3000_Vegetables | Beans, string, cooked, NS as to form, NS as to color, made with margarine                                            | 75                 | 4.5                | A           | 4             |
| 75205043 | 3000_Vegetables | Beans, string, green, cooked, NS as to form, made with margarine                                                     | 75                 | 4.5                | A           | 4             |
| 75221012 | 3000_Vegetables | Onions, cooked, from frozen, fat not added in cooking                                                                | 75                 | 4.5                | A           | 1             |
| 75221041 | 3000_Vegetables | Onions, green, cooked, from fresh, NS as to fat added in cooking                                                     | 74                 | 4.5                | B           | 1             |
| 75223024 | 3000_Vegetables | Peas, cowpeas, field peas, or blackeye peas, not dried, cooked, NS as to form, made with oil                         | 74                 | 5                  | A           | 2             |
| 75223030 | 3000_Vegetables | Peas, cowpeas, field peas, or blackeye peas, not dried, cooked, from frozen, made with oil                           | 74                 | 5                  | A           | 2             |
| 75315210 | 3000_Vegetables | Peas and mushrooms, cooked, fat not added in cooking                                                                 | 74                 | 5                  | A           | 1             |
| 71961010 | 3000_Vegetables | Celeriac, cooked                                                                                                     | 74                 | 4                  | B           | 1             |
| 75302511 | 3000_Vegetables | Beans, string, green, and potatoes, cooked, made with oil                                                            | 74                 | 4.5                | A           | 2             |
| 75330122 | 3000_Vegetables | Vegetable combination, including carrots, broccoli, and/or dark-green leafy; cooked, no sauce, made with butter      | 74                 | 4                  | B           | 2             |
| 75302029 | 3000_Vegetables | Beans, string, green, with chickpeas, cooked, NS as to fat added in cooking                                          | 74                 | 4.5                | A           | 1             |
| 75302031 | 3000_Vegetables | Beans, string, green, with chickpeas, cooked, fat added in cooking                                                   | 74                 | 4.5                | A           | 1             |
| 75212000 | 3000_Vegetables | Cabbage, red, cooked, NS as to fat added in cooking                                                                  | 74                 | 4                  | B           | 3             |
| 75212020 | 3000_Vegetables | Cabbage, red, cooked, fat added in cooking, NS as to type of fat                                                     | 74                 | 4                  | B           | 3             |
| 73201003 | 3000_Vegetables | Pumpkin, cooked, from canned, NS as to fat added in cooking                                                          | 74                 | 4.5                | A           | 3             |
| 73201023 | 3000_Vegetables | Pumpkin, cooked, from canned, fat added in cooking, NS as to type of fat                                             | 74                 | 4.5                | A           | 3             |
| 75205049 | 3000_Vegetables | Beans, string, green, cooked, from frozen, made with margarine                                                       | 74                 | 4.5                | A           | 4             |
| 75208123 | 3000_Vegetables | Beets, cooked, NS as to form, made with margarine                                                                    | 74                 | 4                  | B           | 1             |
| 75208126 | 3000_Vegetables | Beets, cooked, from fresh, made with margarine                                                                       | 74                 | 4                  | B           | 1             |
| 75208129 | 3000_Vegetables | Beets, cooked, from frozen, made with margarine                                                                      | 74                 | 4                  | B           | 1             |
| 75214001 | 3000_Vegetables | Caiflower, cooked, from fresh, NS as to fat added in cooking                                                         | 74                 | 4.5                | A           | 3             |
| 75214021 | 3000_Vegetables | Caiflower, cooked, from fresh, fat added in cooking, NS as to type of fat                                            | 74                 | 4.5                | A           | 3             |
| 75221160 | 3000_Vegetables | Palm hearts, cooked, assume fat not added in cooking                                                                 | 74                 | 4                  | C           | 1             |
| 75222021 | 3000_Vegetables | Parsnips, cooked, made with oil                                                                                      | 74                 | 4.5                | B           | 1             |
| 75220025 | 3000_Vegetables | Okra, cooked, NS as to form, made with butter                                                                        | 74                 | 4.5                | B           | 1             |
| 75233001 | 3000_Vegetables | Squash, summer, yellow or green, cooked, from fresh, NS as to fat added in cooking                                   | 74                 | 4.5                | B           | 3             |
| 75233021 | 3000_Vegetables | Squash, summer, yellow or green, cooked, from fresh, fat added in cooking, NS as to type of fat                      | 74                 | 4.5                | B           | 3             |
| 73303023 | 3000_Vegetables | Squash, winter type, baked, no sugar added in cooking, made with margarine                                           | 74                 | 4.5                | A           | 4             |
| 75221017 | 3000_Vegetables | Onions, cooked, from fresh, made with oil                                                                            | 73                 | 4.5                | B           | 2             |
| 75316024 | 3000_Vegetables | Squash, summer, yellow or green, and onions, cooked, made with margarine                                             | 73                 | 4.5                | B           | 4             |
| 75315121 | 3000_Vegetables | Peas and onions, cooked, made with oil                                                                               | 73                 | 4.5                | A           | 1             |
| 75208132 | 3000_Vegetables | Beets, cooked, from canned, made with margarine                                                                      | 73                 | 4                  | B           | 3             |
| 75220049 | 3000_Vegetables | Lettuce, cooked, NS as to fat added in cooking                                                                       | 73                 | 4                  | B           | 3             |
| 75220051 | 3000_Vegetables | Lettuce, cooked, fat added in cooking                                                                                | 73                 | 4                  | B           | 3             |
| 75503030 | 3000_Vegetables | Cucumber pickles, sour                                                                                               | 73                 | 3                  | C           | 4             |
| 73102219 | 3000_Vegetables | Carrots, cooked, from fresh, made with margarine                                                                     | 73                 | 4.5                | A           | 4             |
| 75204027 | 3000_Vegetables | Beans, lima, immature, cooked, from fresh, made with oil                                                             | 73                 | 5                  | A           | 2             |
| 75204965 | 3000_Vegetables | Beans, string, cooked, from fresh, NS as to color, made with margarine                                               | 73                 | 4.5                | A           | 4             |
| 75205046 | 3000_Vegetables | Beans, string, green, cooked, from fresh, made with margarine                                                        | 73                 | 4.5                | A           | 4             |
| 75213122 | 3000_Vegetables | Cactus, cooked, made with butter                                                                                     | 73                 | 4                  | B           | 1             |
| 73111226 | 3000_Vegetables | Peas and carrots, cooked, NS as to form, made with margarine                                                         | 73                 | 4.5                | A           | 4             |
| 73111229 | 3000_Vegetables | Peas and carrots, cooked, from fresh, made with margarine                                                            | 73                 | 4.5                | A           | 4             |
| 73111232 | 3000_Vegetables | Peas and carrots, cooked, from frozen, made with margarine                                                           | 73                 | 4.5                | A           | 4             |
| 75223027 | 3000_Vegetables | Peas, cowpeas, field peas, or blackeye peas, not dried, cooked, from fresh, made with oil                            | 73                 | 5                  | A           | 2             |
| 73402000 | 3000_Vegetables | Sweet potato, baked, peel eaten, NS as to fat added in cooking                                                       | 72                 | 4.5                | B           | 1             |

| foodcode | level1nd        | Description                                                                                                         | Food Compass Score | Health Star Rating | Nutri-Score | NOVA Category |
|----------|-----------------|---------------------------------------------------------------------------------------------------------------------|--------------------|--------------------|-------------|---------------|
| 73402020 | 3000_Vegetables | Sweet potato, baked, peel eaten, fat added in cooking, NS as to type of fat                                         | 72                 | 4.5                | B           | 1             |
| 73403020 | 3000_Vegetables | Sweet potato, baked, peel not eaten, fat added in cooking, NS as to type of fat                                     | 72                 | 4.5                | B           | 1             |
| 75220032 | 3000_Vegetables | Okra, cooked, from frozen, made with butter                                                                         | 72                 | 4.5                | B           | 2             |
| 73420000 | 3000_Vegetables | Sweet potato tots, NFS                                                                                              | 72                 | 4                  | C           | 3             |
| 75224040 | 3000_Vegetables | Peas, green, cooked, NS as to form, made with oil                                                                   | 72                 | 5                  | A           | 2             |
| 75224046 | 3000_Vegetables | Peas, green, cooked, from frozen, made with oil                                                                     | 72                 | 5                  | A           | 2             |
| 75223012 | 3000_Vegetables | Peas, cowpeas, field peas, or blackeye peas, not dried, cooked, from frozen, fat not added in cooking               | 72                 | 5                  | A           | 1             |
| 75311032 | 3000_Vegetables | Mixed vegetables, cooked, from canned, made with margarine                                                          | 72                 | 4.5                | A           | 4             |
| 74204010 | 3000_Vegetables | Tomatoes, NS as to form, stewed                                                                                     | 72                 | 4.5                | B           | 4             |
| 74204013 | 3000_Vegetables | Tomatoes, from canned, stewed                                                                                       | 72                 | 4.5                | B           | 4             |
| 75218501 | 3000_Vegetables | Lotus root, cooked, fat added in cooking                                                                            | 72                 | 4                  | C           | 2             |
| 75315311 | 3000_Vegetables | Peas and potatoes, cooked, made with oil                                                                            | 72                 | 4.5                | A           | 1             |
| 75206001 | 3000_Vegetables | Beans, string, yellow, cooked, from fresh, NS as to fat added in cooking                                            | 72                 | 4.5                | A           | 1             |
| 75223026 | 3000_Vegetables | Peas, cowpeas, field peas, or blackeye peas, not dried, cooked, NS as to form, made with margarine                  | 72                 | 5                  | A           | 1             |
| 75235000 | 3000_Vegetables | Water chestnut                                                                                                      | 72                 | 5                  | A           | 1             |
| 75223010 | 3000_Vegetables | Peas, cowpeas, field peas, or blackeye peas, not dried, cooked, NS as to form, fat not added in cooking             | 72                 | 5                  | A           | 1             |
| 75226023 | 3000_Vegetables | Peppers, green, cooked, made with margarine                                                                         | 72                 | 4                  | B           | 4             |
| 75340022 | 3000_Vegetables | Vegetable combinations, Asian style, broccoli, green pepper, water chestnut, etc., cooked, made with butter         | 72                 | 4.5                | B           | 1             |
| 74504123 | 3000_Vegetables | Tomato and onion, cooked, made with margarine                                                                       | 72                 | 4                  | B           | 4             |
| 75221040 | 3000_Vegetables | Onions, green, cooked, NS as to form, NS as to fat added in cooking                                                 | 72                 | 4.5                | B           | 3             |
| 75221060 | 3000_Vegetables | Onions, green, cooked, NS as to form, fat added in cooking                                                          | 72                 | 4.5                | B           | 3             |
| 75221016 | 3000_Vegetables | Onions, cooked, NS as to form, made with margarine                                                                  | 72                 | 4.5                | B           | 1             |
| 75223032 | 3000_Vegetables | Peas, cowpeas, field peas, or blackeye peas, not dried, cooked, from frozen, made with margarine                    | 71                 | 5                  | A           | 1             |
| 75214034 | 3000_Vegetables | Cauliflower, cooked, from canned, made with butter                                                                  | 71                 | 4.5                | A           | 3             |
| 75306998 | 3000_Vegetables | Green peppers and onions, cooked, fat not added in cooking                                                          | 71                 | 4.5                | B           | 1             |
| 75221025 | 3000_Vegetables | Onions, cooked, from frozen, made with margarine                                                                    | 71                 | 4.5                | B           | 1             |
| 75317020 | 3000_Vegetables | Vegetables, stew type, cooked, fat not added in cooking                                                             | 71                 | 4.5                | A           | 1             |
| 75340000 | 3000_Vegetables | Vegetable combinations, Asian style, broccoli, green pepper, water chestnut, etc., cooked, NS as to fat added in co | 71                 | 4.5                | B           | 3             |
| 75340020 | 3000_Vegetables | Vegetable combinations, Asian style, broccoli, green pepper, water chestnut, etc., cooked, fat added in cooking, NS | 71                 | 4.5                | B           | 3             |
| 75233003 | 3000_Vegetables | Squash, summer, yellow or green, cooked, from canned, NS as to fat added in cooking                                 | 71                 | 4.5                | A           | 3             |
| 75233023 | 3000_Vegetables | Squash, summer, yellow or green, cooked, from canned, fat added in cooking, NS as to type of fat                    | 71                 | 4.5                | A           | 3             |
| 73201034 | 3000_Vegetables | Pumpkin, cooked, from canned, made with butter                                                                      | 71                 | 4.5                | A           | 2             |
| 75233002 | 3000_Vegetables | Squash, summer, yellow or green, cooked, from frozen, NS as to fat added in cooking                                 | 71                 | 4.5                | B           | 3             |
| 75233022 | 3000_Vegetables | Squash, summer, yellow or green, cooked, from frozen, fat added in cooking, NS as to type of fat                    | 71                 | 4.5                | B           | 3             |
| 75233000 | 3000_Vegetables | Squash, summer, yellow or green, cooked, NS as to form, NS as to fat added in cooking                               | 71                 | 4.5                | B           | 3             |
| 75233020 | 3000_Vegetables | Squash, summer, yellow or green, cooked, NS as to form, fat added in cooking, NS as to type of fat                  | 71                 | 4.5                | B           | 3             |
| 73102203 | 3000_Vegetables | Carrots, cooked, from canned, NS as to fat added in cooking                                                         | 70                 | 4                  | B           | 3             |
| 73102223 | 3000_Vegetables | Carrots, cooked, from canned, fat added in cooking, NS as to type of fat                                            | 70                 | 4                  | B           | 3             |
| 75214028 | 3000_Vegetables | Cauliflower, cooked, from fresh, made with butter                                                                   | 70                 | 4.5                | A           | 2             |
| 73201025 | 3000_Vegetables | Pumpkin, cooked, NS as to form, made with butter                                                                    | 70                 | 4.5                | B           | 2             |
| 73201028 | 3000_Vegetables | Pumpkin, cooked, from fresh, made with butter                                                                       | 70                 | 4.5                | B           | 2             |
| 73201031 | 3000_Vegetables | Pumpkin, cooked, from frozen, made with butter                                                                      | 70                 | 4.5                | B           | 2             |
| 75215100 | 3000_Vegetables | Fennel bulb, cooked, NS as to fat added in cooking                                                                  | 70                 | 4                  | B           | 3             |
| 75215120 | 3000_Vegetables | Fennel bulb, cooked, fat added in cooking, NS as to type of fat                                                     | 70                 | 4                  | B           | 3             |
| 73112113 | 3000_Vegetables | Peas and carrots, cooked, from canned, fat not added in cooking                                                     | 70                 | 4.5                | A           | 3             |
| 75231027 | 3000_Vegetables | Snowpea, cooked, from fresh, made with butter                                                                       | 70                 | 4.5                | A           | 2             |
| 73301000 | 3000_Vegetables | Squash, winter type, mashed, NS as to fat or sugar added in cooking                                                 | 70                 | 4.5                | A           | 3             |
| 73301020 | 3000_Vegetables | Squash, winter type, mashed, fat added in cooking, no sugar added in cooking                                        | 70                 | 4.5                | A           | 3             |
| 73303020 | 3000_Vegetables | Squash, winter type, baked, fat added in cooking, no sugar added in cooking, NS as to type of fat                   | 70                 | 4.5                | A           | 3             |
| 73303000 | 3000_Vegetables | Squash, winter type, baked, NS as to fat or sugar added in cooking                                                  | 70                 | 4.5                | A           | 3             |
| 75218009 | 3000_Vegetables | Kohlrabi, cooked, NS as to fat added in cooking                                                                     | 70                 | 4.5                | B           | 1             |
| 75204029 | 3000_Vegetables | Beans, lima, immature, cooked, from fresh, made with margarine                                                      | 70                 | 5                  | A           | 1             |
| 73403000 | 3000_Vegetables | Sweet potato, baked, peel not eaten, NS as to fat added in cooking                                                  | 70                 | 4.5                | B           | 3             |
| 75330153 | 3000_Vegetables | Vegetable combination, excluding carrots, broccoli, and dark-green leafy; cooked, no sauce, made with margarine     | 70                 | 4.5                | A           | 3             |
| 75214023 | 3000_Vegetables | Cauliflower, cooked, from canned, fat added in cooking, NS as to type of fat                                        | 70                 | 4.5                | B           | 3             |
| 71704000 | 3000_Vegetables | Stewed potatoes with tomatoes                                                                                       | 70                 | 4.5                | B           | 2             |
| 75224042 | 3000_Vegetables | Peas, green, cooked, NS as to form, made with margarine                                                             | 70                 | 5                  | A           | 1             |
| 75221030 | 3000_Vegetables | Onions, pearl, cooked, NS as to form                                                                                | 69                 | 4.5                | B           | 1             |
| 75221032 | 3000_Vegetables | Onions, pearl, cooked, from frozen                                                                                  | 69                 | 4.5                | B           | 1             |
| 75315123 | 3000_Vegetables | Peas and onions, cooked, made with margarine                                                                        | 69                 | 4.5                | A           | 1             |
| 75315021 | 3000_Vegetables | Peas and corn, cooked, made with oil                                                                                | 69                 | 4.5                | A           | 1             |
| 74505023 | 3000_Vegetables | Tomato with corn and okra, cooked, made with margarine                                                              | 69                 | 4.5                | B           | 4             |
| 75206021 | 3000_Vegetables | Beans, string, yellow, cooked, from fresh, fat added in cooking, NS as to type of fat                               | 69                 | 4.5                | A           | 3             |
| 75315250 | 3000_Vegetables | Cowpeas with snap beans, cooked, fat not added in cooking                                                           | 69                 | 4.5                | A           | 1             |
| 73410310 | 3000_Vegetables | Sweet potato fries, frozen, fried                                                                                   | 69                 | 4.5                | B           | 3             |
| 75221010 | 3000_Vegetables | Onions, cooked, NS as to form, fat not added in cooking                                                             | 69                 | 4.5                | A           | 1             |
| 75222023 | 3000_Vegetables | Parsnips, cooked, made with margarine                                                                               | 69                 | 4.5                | B           | 1             |
| 75223033 | 3000_Vegetables | Peas, cowpeas, field peas, or blackeye peas, not dried, cooked, from canned, made with oil                          | 69                 | 5                  | A           | 2             |
| 75231024 | 3000_Vegetables | Snowpea, cooked, NS as to form, made with butter                                                                    | 69                 | 4.5                | A           | 1             |
| 75231030 | 3000_Vegetables | Snowpea, cooked, from frozen, made with butter                                                                      | 69                 | 4.5                | A           | 1             |
| 75201002 | 3000_Vegetables | Artichoke, cooked, from frozen, NS as to fat added in cooking                                                       | 68                 | 4.5                | A           | 1             |
| 75201020 | 3000_Vegetables | Artichoke, cooked, NS as to form, fat added in cooking, NS as to type of fat                                        | 68                 | 4.5                | A           | 1             |
| 75201022 | 3000_Vegetables | Artichoke, cooked, from frozen, fat added in cooking, NS as to type of fat                                          | 68                 | 4.5                | A           | 1             |
| 75233028 | 3000_Vegetables | Squash, summer, yellow or green, cooked, from fresh, made with butter                                               | 68                 | 4                  | B           | 2             |
| 75204011 | 3000_Vegetables | Beans, lima, immature, cooked, from fresh, fat not added in cooking                                                 | 68                 | 5                  | A           | 1             |
| 75510020 | 3000_Vegetables | Olives, black                                                                                                       | 68                 | 3.5                | C           | 3             |
| 75223029 | 3000_Vegetables | Peas, cowpeas, field peas, or blackeye peas, not dried, cooked, from fresh, made with margarine                     | 68                 | 5                  | A           | 1             |
| 75200110 | 3000_Vegetables | Vegetables, NS as to type, cooked, fat not added in cooking                                                         | 68                 | 5                  | A           | 1             |
| 75311010 | 3000_Vegetables | Mixed vegetables, cooked, NS as to form, fat not added in cooking                                                   | 68                 | 5                  | A           | 1             |
| 75311012 | 3000_Vegetables | Mixed vegetables, cooked, from frozen, fat not added in cooking                                                     | 68                 | 5                  | A           | 1             |
| 75212022 | 3000_Vegetables | Cabbage, red, cooked, made with butter                                                                              | 68                 | 4                  | B           | 1             |
| 75215040 | 3000_Vegetables | Celery, cooked, made with butter                                                                                    | 68                 | 4                  | B           | 2             |
| 75211010 | 3000_Vegetables | Cabbage, green, cooked, NS as to fat added in cooking                                                               | 68                 | 4                  | B           | 3             |
| 75211030 | 3000_Vegetables | Cabbage, green, cooked, fat added in cooking, NS as to type of fat                                                  | 68                 | 4                  | B           | 3             |
| 75224049 | 3000_Vegetables | Peas, green, cooked, from canned, made with oil                                                                     | 68                 | 5                  | A           | 1             |
| 75510030 | 3000_Vegetables | Olives, green, stuffed                                                                                              | 68                 | 3                  | C           | 3             |
| 75315110 | 3000_Vegetables | Peas and onions, cooked, fat not added in cooking                                                                   | 68                 | 4.5                | A           | 1             |
| 75223011 | 3000_Vegetables | Peas, cowpeas, field peas, or blackeye peas, not dried, cooked, from fresh, fat not added in cooking                | 68                 | 5                  | A           | 1             |
| 75208013 | 3000_Vegetables | Beets, cooked, from canned, fat not added in cooking                                                                | 68                 | 4                  | B           | 3             |
| 75316020 | 3000_Vegetables | Squash, summer, yellow or green, and onions, cooked, fat added in cooking                                           | 68                 | 4.5                | B           | 3             |
| 75201001 | 3000_Vegetables | Artichoke, cooked, from fresh, NS as to fat added in cooking                                                        | 68                 | 5                  | A           | 1             |
| 74205020 | 3000_Vegetables | Tomato, green, pickled                                                                                              | 68                 | 4.5                | B           | 1             |
| 75205002 | 3000_Vegetables | Beans, string, cooked, from frozen, NS as to color, NS as to fat added in cooking                                   | 68                 | 4.5                | A           | 1             |
| 74504100 | 3000_Vegetables | Tomato and onion, cooked, NS as to fat added in cooking                                                             | 68                 | 4                  | B           | 3             |
| 74504120 | 3000_Vegetables | Tomato and onion, cooked, fat added in cooking, NS as to type of fat                                                | 68                 | 4                  | B           | 3             |
| 75215122 | 3000_Vegetables | Fennel bulb, cooked, made with butter                                                                               | 68                 | 4                  | B           | 1             |
| 73102202 | 3000_Vegetables | Carrots, cooked, from frozen, NS as to fat added in cooking                                                         | 68                 | 4.5                | B           | 3             |
| 73102222 | 3000_Vegetables | Carrots, cooked, from frozen, fat added in cooking, NS as to type of fat                                            | 68                 | 4.5                | B           | 3             |
| 75215509 | 3000_Vegetables | Christophine, cooked, NS as to fat added in cooking                                                                 | 67                 | 4.5                | A           | 3             |
| 75215511 | 3000_Vegetables | Christophine, cooked, fat added in cooking                                                                          | 67                 | 4.5                | A           | 3             |
| 71103135 | 3000_Vegetables | Potato, boiled, from fresh, peel eaten, made with oil                                                               | 67                 | 4.5                | A           | 2             |
| 71104070 | 3000_Vegetables | Potato, roasted, from fresh, peel eaten, made with oil                                                              | 67                 | 4.5                | A           | 2             |
| 73102200 | 3000_Vegetables | Carrots, cooked, NS as to form, NS as to fat added in cooking                                                       | 67                 | 4.5                | B           | 3             |
| 73102220 | 3000_Vegetables | Carrots, cooked, NS as to form, fat added in cooking, NS as to type of fat                                          | 67                 | 4.5                | B           | 3             |

| foodcode | level1nd        | Description                                                                                                          | Food Compass Score | Health Star Rating | Nutri-Score | NOVA Category |
|----------|-----------------|----------------------------------------------------------------------------------------------------------------------|--------------------|--------------------|-------------|---------------|
| 73102201 | 3000_Vegetables | Carrots, cooked, from fresh, NS as to fat added in cooking                                                           | 67                 | 4.5                | B           | 3             |
| 73102211 | 3000_Vegetables | Carrots, cooked, from fresh, fat added in cooking, NS as to type of fat                                              | 67                 | 4.5                | B           | 3             |
| 75225010 | 3000_Vegetables | Pigeon peas, cooked, NS as to form, fat not added in cooking                                                         | 67                 | 5                  | A           | 1             |
| 75225011 | 3000_Vegetables | Pigeon peas, cooked, from fresh, fat not added in cooking                                                            | 67                 | 5                  | A           | 1             |
| 75225013 | 3000_Vegetables | Pigeon peas, cooked, from canned, fat not added in cooking                                                           | 67                 | 5                  | A           | 1             |
| 75206002 | 3000_Vegetables | Beans, string, yellow, cooked, from frozen, NS as to fat added in cooking                                            | 67                 | 4.5                | A           | 1             |
| 75218011 | 3000_Vegetables | Kohlrabi, cooked, fat added in cooking                                                                               | 67                 | 4.5                | B           | 3             |
| 75511020 | 3000_Vegetables | Peppers, pickled                                                                                                     | 67                 | 4.5                | A           | 3             |
| 75216321 | 3000_Vegetables | Corn, yellow, canned, low sodium, made with oil                                                                      | 67                 | 4.5                | A           | 3             |
| 74503010 | 3000_Vegetables | Tomato and corn, cooked, fat not added in cooking                                                                    | 67                 | 4                  | B           | 3             |
| 75512010 | 3000_Vegetables | Radishes, pickled, Hawaiian style                                                                                    | 67                 | 4                  | C           | 4             |
| 75224110 | 3000_Vegetables | Peas, green, canned, low sodium, NS as to fat added in cooking                                                       | 67                 | 5                  | A           | 3             |
| 75208010 | 3000_Vegetables | Beets, cooked, NS as to form, fat not added in cooking                                                               | 67                 | 4.5                | B           | 1             |
| 75208011 | 3000_Vegetables | Beets, cooked, from fresh, fat not added in cooking                                                                  | 67                 | 4.5                | B           | 1             |
| 75208012 | 3000_Vegetables | Beets, cooked, from frozen, fat not added in cooking                                                                 | 67                 | 4.5                | B           | 1             |
| 73405010 | 3000_Vegetables | Sweet potato, boiled, fat not added in cooking                                                                       | 67                 | 4.5                | B           | 1             |
| 75224130 | 3000_Vegetables | Peas, green, canned, low sodium, fat added in cooking, NS as to type of fat                                          | 67                 | 5                  | A           | 3             |
| 75206034 | 3000_Vegetables | Beans, string, yellow, cooked, from fresh, made with butter                                                          | 67                 | 4.5                | A           | 1             |
| 75315313 | 3000_Vegetables | Peas and potatoes, cooked, made with margarine                                                                       | 67                 | 4.5                | A           | 1             |
| 75109600 | 3000_Vegetables | Corn, raw                                                                                                            | 67                 | 4.5                | A           | 1             |
| 75204980 | 3000_Vegetables | Beans, string, cooked, NS as to form, NS as to color, fat added in cooking, NS as to type of fat                     | 67                 | 4.5                | A           | 3             |
| 75205000 | 3000_Vegetables | Beans, string, cooked, NS as to form, NS as to color, NS as to fat added in cooking                                  | 67                 | 4.5                | A           | 3             |
| 75205010 | 3000_Vegetables | Beans, string, green, cooked, NS as to form, NS as to fat added in cooking                                           | 67                 | 4.5                | A           | 3             |
| 75205030 | 3000_Vegetables | Beans, string, green, cooked, NS as to form, fat added in cooking, NS as to type of fat                              | 67                 | 4.5                | A           | 3             |
| 75510000 | 3000_Vegetables | Olives, NFS                                                                                                          | 66                 | 3.5                | C           | 3             |
| 75535000 | 3000_Vegetables | Zucchini, pickled                                                                                                    | 66                 | 4.5                | B           | 3             |
| 75221031 | 3000_Vegetables | Onions, pearl, cooked, from fresh                                                                                    | 66                 | 4.5                | B           | 1             |
| 75221033 | 3000_Vegetables | Onions, pearl, cooked, from canned                                                                                   | 66                 | 4.5                | B           | 1             |
| 73111235 | 3000_Vegetables | Peas and carrots, cooked, from canned, made with margarine                                                           | 66                 | 4.5                | A           | 4             |
| 75302505 | 3000_Vegetables | Beans, string, green, and potatoes, cooked, fat not added in cooking                                                 | 66                 | 4.5                | A           | 1             |
| 75201032 | 3000_Vegetables | Artichoke, cooked, NS as to form, made with butter                                                                   | 66                 | 5                  | A           | 1             |
| 75201035 | 3000_Vegetables | Artichoke, cooked, from fresh, made with butter                                                                      | 66                 | 5                  | A           | 1             |
| 75201041 | 3000_Vegetables | Artichoke, cooked, from frozen, made with butter                                                                     | 66                 | 4.5                | A           | 1             |
| 75233025 | 3000_Vegetables | Squash, summer, yellow or green, cooked, NS as to form, made with butter                                             | 66                 | 4                  | B           | 2             |
| 75233031 | 3000_Vegetables | Squash, summer, yellow or green, cooked, from frozen, made with butter                                               | 66                 | 4                  | B           | 1             |
| 75204983 | 3000_Vegetables | Beans, string, cooked, from canned, NS as to color, fat added in cooking, NS as to type of fat                       | 66                 | 4                  | B           | 3             |
| 75205003 | 3000_Vegetables | Beans, string, cooked, from canned, NS as to color, NS as to fat added in cooking                                    | 66                 | 4                  | B           | 3             |
| 75315999 | 3000_Vegetables | Squash, summer, yellow or green, and onions, cooked, NS as to fat added in cooking                                   | 66                 | 4.5                | B           | 3             |
| 75223035 | 3000_Vegetables | Peas, cowpeas, field peas, or blackeye peas, not dried, cooked, from canned, made with margarine                     | 66                 | 5                  | A           | 1             |
| 75205013 | 3000_Vegetables | Beans, string, green, cooked, from canned, NS as to fat added in cooking                                             | 66                 | 4                  | B           | 3             |
| 75205033 | 3000_Vegetables | Beans, string, green, cooked, from canned, fat added in cooking, NS as to type of fat                                | 66                 | 4                  | B           | 3             |
| 75201000 | 3000_Vegetables | Artichoke, cooked, NS as to form, NS as to fat added in cooking                                                      | 66                 | 4.5                | A           | 3             |
| 75201003 | 3000_Vegetables | Artichoke, cooked, from canned, NS as to fat added in cooking                                                        | 66                 | 4.5                | A           | 3             |
| 75201023 | 3000_Vegetables | Artichoke, cooked, from canned, fat added in cooking, NS as to type of fat                                           | 66                 | 4.5                | A           | 3             |
| 71103030 | 3000_Vegetables | Potato, boiled, from fresh, peel not eaten, made with oil                                                            | 66                 | 4.5                | B           | 2             |
| 71104130 | 3000_Vegetables | Potato, roasted, from fresh, peel not eaten, made with oil                                                           | 66                 | 4.5                | B           | 2             |
| 73303022 | 3000_Vegetables | Squash, winter type, baked, no sugar added in cooking, made with butter                                              | 66                 | 4.5                | B           | 2             |
| 75211032 | 3000_Vegetables | Cabbage, green, cooked, made with butter                                                                             | 66                 | 4                  | B           | 2             |
| 75330140 | 3000_Vegetables | Vegetable combination, excluding carrots, broccoli, and dark-green leafy; cooked, no sauce, fat not added in cooking | 66                 | 4.5                | A           | 1             |
| 75510010 | 3000_Vegetables | Olives, green                                                                                                        | 65                 | 2.5                | C           | 3             |
| 71910310 | 3000_Vegetables | Pickled green bananas, Puerto Rican style                                                                            | 65                 | 3.5                | C           | 2             |
| 73421000 | 3000_Vegetables | Sweet potato, yellow, Puerto Rican, cooked                                                                           | 65                 | 4                  | B           | 1             |
| 75226040 | 3000_Vegetables | Peppers, red, cooked, NS as to fat added in cooking                                                                  | 65                 | 4                  | B           | 3             |
| 75226060 | 3000_Vegetables | Peppers, red, cooked, fat added in cooking, NS as to type of fat                                                     | 65                 | 4                  | B           | 3             |
| 73111201 | 3000_Vegetables | Peas and carrots, cooked, from fresh, NS as to fat added in cooking                                                  | 65                 | 4.5                | A           | 3             |
| 73111221 | 3000_Vegetables | Peas and carrots, cooked, from fresh, fat added in cooking, NS as to type of fat                                     | 65                 | 4.5                | A           | 3             |
| 75206010 | 3000_Vegetables | Beans, string, yellow, cooked, NS as to form, fat not added in cooking                                               | 65                 | 4.5                | A           | 3             |
| 75221011 | 3000_Vegetables | Onions, cooked, from fresh, fat not added in cooking                                                                 | 65                 | 4.5                | B           | 1             |
| 71910210 | 3000_Vegetables | Green banana, fried                                                                                                  | 65                 | 4                  | B           | 2             |
| 75204024 | 3000_Vegetables | Beans, lima, immature, cooked, NS as to form, made with oil                                                          | 65                 | 5                  | A           | 1             |
| 75206000 | 3000_Vegetables | Beans, string, yellow, cooked, NS as to form, NS as to fat added in cooking                                          | 65                 | 4.5                | A           | 3             |
| 75206020 | 3000_Vegetables | Beans, string, yellow, cooked, NS as to form, fat added in cooking, NS as to type of fat                             | 65                 | 4.5                | A           | 3             |
| 71603010 | 3000_Vegetables | Potato salad, made with mayonnaise                                                                                   | 65                 | 4                  | B           | 3             |
| 71603030 | 3000_Vegetables | Potato salad, made with creamy dressing                                                                              | 65                 | 4                  | B           | 3             |
| 75201021 | 3000_Vegetables | Artichoke, cooked, from fresh, fat added in cooking, NS as to type of fat                                            | 65                 | 5                  | A           | 3             |
| 75204982 | 3000_Vegetables | Beans, string, cooked, from frozen, NS as to color, fat added in cooking, NS as to type of fat                       | 65                 | 4.5                | A           | 3             |
| 75205012 | 3000_Vegetables | Beans, string, green, cooked, from frozen, NS as to fat added in cooking                                             | 65                 | 4.5                | A           | 3             |
| 75205032 | 3000_Vegetables | Beans, string, green, cooked, from frozen, fat added in cooking, NS as to type of fat                                | 65                 | 4.5                | A           | 3             |
| 71703990 | 3000_Vegetables | Stewed potatoes                                                                                                      | 65                 | 4.5                | B           | 2             |
| 75206022 | 3000_Vegetables | Beans, string, yellow, cooked, from frozen, fat added in cooking, NS as to type of fat                               | 65                 | 4.5                | A           | 3             |
| 71905110 | 3000_Vegetables | Fried ripe plantain, Puerto Rican style                                                                              | 65                 | 4                  | C           | 2             |
| 75234002 | 3000_Vegetables | Turnip, cooked, from frozen, NS as to fat added in cooking                                                           | 65                 | 4                  | B           | 1             |
| 75234020 | 3000_Vegetables | Turnip, cooked, NS as to form, fat added in cooking, NS as to type of fat                                            | 65                 | 4                  | B           | 1             |
| 73403023 | 3000_Vegetables | Sweet potato, baked, peel not eaten, made with margarine                                                             | 65                 | 4.5                | A           | 4             |
| 75224022 | 3000_Vegetables | Peas, green, cooked, from frozen, fat not added in cooking                                                           | 64                 | 5                  | A           | 1             |
| 75223013 | 3000_Vegetables | Peas, cowpeas, field peas, or blackeye peas, not dried, cooked, from canned, fat not added in cooking                | 64                 | 5                  | A           | 1             |
| 75224020 | 3000_Vegetables | Peas, green, cooked, NS as to form, fat not added in cooking                                                         | 64                 | 5                  | A           | 1             |
| 75502010 | 3000_Vegetables | Cauliflower, pickled                                                                                                 | 64                 | 4                  | B           | 3             |
| 73111200 | 3000_Vegetables | Peas and carrots, cooked, NS as to form, NS as to fat added in cooking                                               | 64                 | 4.5                | A           | 3             |
| 73111202 | 3000_Vegetables | Peas and carrots, cooked, from frozen, NS as to fat added in cooking                                                 | 64                 | 4.5                | A           | 3             |
| 73111220 | 3000_Vegetables | Peas and carrots, cooked, NS as to form, fat added in cooking, NS as to type of fat                                  | 64                 | 4.5                | A           | 3             |
| 73111222 | 3000_Vegetables | Peas and carrots, cooked, from frozen, fat added in cooking, NS as to type of fat                                    | 64                 | 4.5                | A           | 3             |
| 71401010 | 3000_Vegetables | Potato, french fries, from fresh, fried                                                                              | 64                 | 2                  | B           | 4             |
| 75315300 | 3000_Vegetables | Peas and potatoes, cooked, fat not added in cooking                                                                  | 64                 | 4.5                | A           | 1             |
| 73410320 | 3000_Vegetables | Sweet potato fries, frozen, baked                                                                                    | 64                 | 4.5                | B           | 4             |
| 73410500 | 3000_Vegetables | Sweet potato fries, school                                                                                           | 64                 | 4.5                | B           | 4             |
| 73420200 | 3000_Vegetables | Sweet potato tots, school                                                                                            | 64                 | 4.5                | B           | 4             |
| 75224132 | 3000_Vegetables | Peas, green, canned, low sodium, made with butter                                                                    | 64                 | 5                  | A           | 2             |
| 75204030 | 3000_Vegetables | Beans, lima, immature, cooked, from frozen, made with oil                                                            | 64                 | 5                  | A           | 2             |
| 71905000 | 3000_Vegetables | Ripe plantain, raw                                                                                                   | 64                 | 4                  | B           | 1             |
| 75503085 | 3000_Vegetables | Ginger root, pickled                                                                                                 | 64                 | 3.5                | B           | 4             |
| 75209499 | 3000_Vegetables | Burdock, cooked, NS as to fat added in cooking                                                                       | 64                 | 4                  | B           | 1             |
| 75209501 | 3000_Vegetables | Burdock, cooked, fat added in cooking                                                                                | 64                 | 4                  | B           | 1             |
| 75201038 | 3000_Vegetables | Artichoke, cooked, from canned, made with butter                                                                     | 64                 | 4.5                | A           | 3             |
| 75204981 | 3000_Vegetables | Beans, string, cooked, from fresh, NS as to color, fat added in cooking, NS as to type of fat                        | 63                 | 4.5                | A           | 3             |
| 75205001 | 3000_Vegetables | Beans, string, cooked, from fresh, NS as to color, NS as to fat added in cooking                                     | 63                 | 4.5                | A           | 3             |
| 75205011 | 3000_Vegetables | Beans, string, green, cooked, from fresh, NS as to fat added in cooking                                              | 63                 | 4.5                | A           | 3             |
| 75205031 | 3000_Vegetables | Beans, string, green, cooked, from fresh, fat added in cooking, NS as to type of fat                                 | 63                 | 4.5                | A           | 3             |
| 73111225 | 3000_Vegetables | Peas and carrots, cooked, NS as to form, made with butter                                                            | 63                 | 4.5                | A           | 2             |
| 73111228 | 3000_Vegetables | Peas and carrots, cooked, from fresh, made with butter                                                               | 63                 | 4.5                | A           | 2             |
| 73111231 | 3000_Vegetables | Peas and carrots, cooked, from frozen, made with butter                                                              | 63                 | 4.5                | A           | 2             |
| 75206003 | 3000_Vegetables | Beans, string, yellow, cooked, from canned, NS as to fat added in cooking                                            | 63                 | 4                  | C           | 3             |
| 75206023 | 3000_Vegetables | Beans, string, yellow, cooked, from canned, fat added in cooking, NS as to type of fat                               | 63                 | 4                  | C           | 3             |
| 73407050 | 3000_Vegetables | Sweet potato, canned, fat not added in cooking                                                                       | 63                 | 4.5                | B           | 1             |

| foodcode | level1nd        | Description                                                                                                             | Food Compass Score | Health Star Rating | Nutri-Score | NOVA Category |
|----------|-----------------|-------------------------------------------------------------------------------------------------------------------------|--------------------|--------------------|-------------|---------------|
| 75233034 | 3000_Vegetables | Squash, summer, yellow or green, cooked, from canned, made with butter                                                  | 63                 | 4                  | B           | 3             |
| 75208100 | 3000_Vegetables | Beets, canned, low sodium, NS as to fat added in cooking                                                                | 63                 | 4.5                | B           | 3             |
| 75208120 | 3000_Vegetables | Beets, canned, low sodium, fat added in cooking, NS as to type of fat                                                   | 63                 | 4.5                | B           | 3             |
| 71401015 | 3000_Vegetables | Potato, french fries, from fresh, baked                                                                                 | 63                 | 4                  | B           | 2             |
| 75226000 | 3000_Vegetables | Peppers, green, cooked, NS as to fat added in cooking                                                                   | 63                 | 4                  | B           | 3             |
| 75226020 | 3000_Vegetables | Peppers, green, cooked, fat added in cooking, NS as to type of fat                                                      | 63                 | 4                  | B           | 3             |
| 71403500 | 3000_Vegetables | Potato, home fries, with vegetables                                                                                     | 63                 | 4                  | C           | 2             |
| 74505000 | 3000_Vegetables | Tomato with corn and okra, cooked, NS as to fat added in cooking                                                        | 63                 | 4.5                | A           | 3             |
| 74505020 | 3000_Vegetables | Tomato with corn and okra, cooked, fat added in cooking, NS as to type of fat                                           | 63                 | 4.5                | A           | 3             |
| 75311003 | 3000_Vegetables | Mixed vegetables, cooked, from canned, NS as to fat added in cooking                                                    | 63                 | 4.5                | A           | 3             |
| 75311023 | 3000_Vegetables | Mixed vegetables, cooked, from canned, fat added in cooking, NS as to type of fat                                       | 63                 | 4.5                | A           | 3             |
| 73405000 | 3000_Vegetables | Sweet potato, boiled, NS as to fat added in cooking                                                                     | 63                 | 4                  | B           | 3             |
| 73405020 | 3000_Vegetables | Sweet potato, boiled, fat added in cooking, NS as to type of fat                                                        | 63                 | 4                  | B           | 3             |
| 73401000 | 3000_Vegetables | Sweet potato, NFS                                                                                                       | 63                 | 4                  | B           | 3             |
| 75204033 | 3000_Vegetables | Beans, lima, immature, cooked, from canned, made with oil                                                               | 63                 | 5                  | A           | 3             |
| 75302200 | 3000_Vegetables | Beans, string, green, with onions, NS as to fat added in cooking                                                        | 62                 | 4.5                | B           | 3             |
| 75302210 | 3000_Vegetables | Beans, string, green, with onions, cooked, fat added in cooking, NS as to type of fat                                   | 62                 | 4.5                | B           | 3             |
| 71900200 | 3000_Vegetables | Plantain, fried, NS as to green or ripe                                                                                 | 62                 | 4                  | C           | 2             |
| 75233200 | 3000_Vegetables | Squash, spaghetti, cooked, NS as to fat added in cooking                                                                | 62                 | 4.5                | A           | 1             |
| 75311026 | 3000_Vegetables | Mixed vegetables, cooked, NS as to form, made with margarine                                                            | 62                 | 5                  | A           | 4             |
| 75311029 | 3000_Vegetables | Mixed vegetables, cooked, from frozen, made with margarine                                                              | 62                 | 5                  | A           | 4             |
| 73102218 | 3000_Vegetables | Carrots, cooked, from fresh, made with butter                                                                           | 62                 | 4.5                | B           | 2             |
| 75234000 | 3000_Vegetables | Turnip, cooked, NS as to form, NS as to fat added in cooking                                                            | 62                 | 4                  | B           | 3             |
| 75234003 | 3000_Vegetables | Turnip, cooked, from canned, NS as to fat added in cooking                                                              | 62                 | 4                  | B           | 3             |
| 75311031 | 3000_Vegetables | Mixed vegetables, cooked, from canned, made with butter                                                                 | 62                 | 4.5                | A           | 2             |
| 73102228 | 3000_Vegetables | Carrots, cooked, from canned, made with butter                                                                          | 62                 | 4                  | B           | 2             |
| 75234022 | 3000_Vegetables | Turnip, cooked, from frozen, fat added in cooking, NS as to type of fat                                                 | 62                 | 4                  | B           | 3             |
| 75228000 | 3000_Vegetables | Rutabaga, cooked, NS as to fat added in cooking                                                                         | 62                 | 4.5                | B           | 3             |
| 75228020 | 3000_Vegetables | Rutabaga, cooked, fat added in cooking, NS as to type of fat                                                            | 62                 | 4.5                | B           | 3             |
| 75303021 | 3000_Vegetables | Corn with peppers, red or green, cooked, made with oil                                                                  | 62                 | 4.5                | B           | 2             |
| 75222010 | 3000_Vegetables | Parsnips, cooked, fat not added in cooking                                                                              | 62                 | 4.5                | A           | 1             |
| 71602950 | 3000_Vegetables | Potato salad, from restaurant                                                                                           | 61                 | 4                  | C           | 3             |
| 73407060 | 3000_Vegetables | Sweet potato, canned, fat added in cooking                                                                              | 61                 | 4                  | C           | 3             |
| 71900100 | 3000_Vegetables | Plantain, boiled, NS as to green or ripe                                                                                | 61                 | 4                  | B           | 1             |
| 71901010 | 3000_Vegetables | Green plantains, boiled                                                                                                 | 61                 | 4                  | B           | 1             |
| 75216310 | 3000_Vegetables | Corn, yellow, canned, low sodium, fat not added in cooking                                                              | 61                 | 4.5                | A           | 3             |
| 75208112 | 3000_Vegetables | Beets, canned, low sodium, made with butter                                                                             | 61                 | 4.5                | B           | 3             |
| 75224011 | 3000_Vegetables | Peas, green, cooked, from fresh, NS as to fat added in cooking                                                          | 61                 | 5                  | A           | 3             |
| 75224031 | 3000_Vegetables | Peas, green, cooked, from fresh, fat added in cooking, NS as to type of fat                                             | 61                 | 5                  | A           | 3             |
| 75316023 | 3000_Vegetables | Squash, summer, yellow or green, and onions, cooked, made with butter                                                   | 61                 | 4                  | B           | 2             |
| 75218500 | 3000_Vegetables | Lotus root, cooked, fat not added in cooking                                                                            | 61                 | 4.5                | B           | 1             |
| 75219040 | 3000_Vegetables | Mushrooms, cooked, from canned, made with butter                                                                        | 61                 | 4                  | C           | 3             |
| 75204961 | 3000_Vegetables | Beans, string, cooked, NS as to form, NS as to color, made with butter                                                  | 61                 | 4.5                | A           | 1             |
| 73420020 | 3000_Vegetables | Sweet potato tots, from frozen, baked                                                                                   | 61                 | 4                  | C           | 4             |
| 73102215 | 3000_Vegetables | Carrots, cooked, NS as to form, made with butter                                                                        | 61                 | 4.5                | B           | 2             |
| 73102225 | 3000_Vegetables | Carrots, cooked, from frozen, made with butter                                                                          | 61                 | 4.5                | B           | 2             |
| 73407000 | 3000_Vegetables | Sweet potato, canned, NS as to fat added in cooking                                                                     | 61                 | 4                  | C           | 3             |
| 75206031 | 3000_Vegetables | Beans, string, yellow, cooked, NS as to form, made with butter                                                          | 60                 | 4.5                | A           | 1             |
| 75204026 | 3000_Vegetables | Beans, lima, immature, cooked, NS as to form, made with margarine                                                       | 60                 | 5                  | A           | 1             |
| 75315010 | 3000_Vegetables | Peas and corn, cooked, fat not added in cooking                                                                         | 60                 | 4.5                | A           | 1             |
| 71403040 | 3000_Vegetables | Potato, home fries, from fresh                                                                                          | 60                 | 4                  | C           | 2             |
| 75307003 | 3000_Vegetables | Green peppers and onions, cooked, made with margarine                                                                   | 60                 | 4.5                | B           | 4             |
| 71905120 | 3000_Vegetables | Plantain, ripe, rolled in flour, fried                                                                                  | 60                 | 4                  | C           | 2             |
| 73303040 | 3000_Vegetables | Squash, winter type, baked, no fat added in cooking, sugar added in cooking                                             | 60                 | 4.5                | B           | 2             |
| 71403020 | 3000_Vegetables | Potato, home fries, NFS                                                                                                 | 60                 | 4                  | C           | 2             |
| 75226062 | 3000_Vegetables | Peppers, red, cooked, made with butter                                                                                  | 60                 | 4                  | B           | 2             |
| 75234031 | 3000_Vegetables | Turnip, cooked, from frozen, made with butter                                                                           | 60                 | 4                  | B           | 1             |
| 75234034 | 3000_Vegetables | Turnip, cooked, NS as to form, made with butter                                                                         | 60                 | 4                  | B           | 1             |
| 71405010 | 3000_Vegetables | Potato, hash brown, from fresh                                                                                          | 60                 | 4                  | C           | 2             |
| 71103125 | 3000_Vegetables | Potato, boiled, from fresh, peel eaten, fat not added in cooking                                                        | 59                 | 4.5                | A           | 1             |
| 71104050 | 3000_Vegetables | Potato, roasted, from fresh, peel eaten, fat not added in cooking                                                       | 59                 | 4.5                | A           | 1             |
| 71601030 | 3000_Vegetables | Potato salad with egg, made with creamy dressing                                                                        | 59                 | 4                  | B           | 3             |
| 75205042 | 3000_Vegetables | Beans, string, green, cooked, NS as to form, made with butter                                                           | 59                 | 4.5                | A           | 2             |
| 74205011 | 3000_Vegetables | Tomatoes, green, cooked, from fresh                                                                                     | 59                 | 4                  | C           | 2             |
| 75225016 | 3000_Vegetables | Pigeon peas, cooked, from fresh, NS as to fat added in cooking                                                          | 59                 | 5                  | A           | 1             |
| 75225017 | 3000_Vegetables | Pigeon peas, cooked, from fresh, fat added in cooking                                                                   | 59                 | 5                  | A           | 1             |
| 74504122 | 3000_Vegetables | Tomato and onion, cooked, made with butter                                                                              | 59                 | 4                  | B           | 2             |
| 75216174 | 3000_Vegetables | Corn, yellow and white, cooked, NS as to form, made with oil                                                            | 59                 | 4.5                | A           | 1             |
| 74505022 | 3000_Vegetables | Tomato with corn and okra, cooked, made with butter                                                                     | 59                 | 4                  | B           | 2             |
| 75204970 | 3000_Vegetables | Beans, string, cooked, from canned, NS as to color, made with butter                                                    | 59                 | 4                  | B           | 2             |
| 75205051 | 3000_Vegetables | Beans, string, green, cooked, from canned, made with butter                                                             | 59                 | 4                  | B           | 2             |
| 75204964 | 3000_Vegetables | Beans, string, cooked, from fresh, NS as to color, made with butter                                                     | 59                 | 4.5                | A           | 2             |
| 75205045 | 3000_Vegetables | Beans, string, green, cooked, from fresh, made with butter                                                              | 59                 | 4.5                | A           | 2             |
| 75303010 | 3000_Vegetables | Corn with peppers, red or green, cooked, fat not added in cooking                                                       | 59                 | 4.5                | B           | 1             |
| 75303023 | 3000_Vegetables | Corn with peppers, red or green, cooked, made with margarine                                                            | 59                 | 4.5                | B           | 1             |
| 75216031 | 3000_Vegetables | Corn, cooked, from frozen, NS as to color, made with oil                                                                | 59                 | 4.5                | A           | 1             |
| 73405023 | 3000_Vegetables | Sweet potato, boiled, made with margarine                                                                               | 59                 | 4                  | B           | 4             |
| 71508001 | 3000_Vegetables | Potato, baked, peel eaten                                                                                               | 58                 | 4.5                | A           | 1             |
| 75204967 | 3000_Vegetables | Beans, string, cooked, from frozen, NS as to color, made with butter                                                    | 58                 | 4.5                | A           | 2             |
| 75205048 | 3000_Vegetables | Beans, string, green, cooked, from frozen, made with butter                                                             | 58                 | 4.5                | A           | 2             |
| 75301121 | 3000_Vegetables | Beans, lima and corn, cooked, made with oil                                                                             | 58                 | 5                  | A           | 2             |
| 75315200 | 3000_Vegetables | Peas and mushrooms, cooked, NS as to fat added in cooking                                                               | 58                 | 4.5                | A           | 3             |
| 75315215 | 3000_Vegetables | Peas and mushrooms, cooked, fat added in cooking, NS as to type of fat                                                  | 58                 | 4.5                | A           | 3             |
| 75223002 | 3000_Vegetables | Peas, cowpeas, field peas, or blackeye peas, not dried, cooked, from frozen, NS as to fat added in cooking              | 58                 | 5                  | A           | 3             |
| 75223022 | 3000_Vegetables | Peas, cowpeas, field peas, or blackeye peas, not dried, cooked, from frozen, fat added in cooking, NS as to type of fat | 58                 | 5                  | A           | 3             |
| 75206037 | 3000_Vegetables | Beans, string, yellow, cooked, from frozen, made with butter                                                            | 58                 | 4.5                | A           | 2             |
| 71600950 | 3000_Vegetables | Potato salad with egg, from restaurant                                                                                  | 58                 | 4                  | C           | 3             |
| 75224023 | 3000_Vegetables | Peas, green, cooked, from canned, fat not added in cooking                                                              | 58                 | 5                  | A           | 3             |
| 75233223 | 3000_Vegetables | Squash, spaghetti, cooked, made with margarine                                                                          | 58                 | 4                  | B           | 4             |
| 75234001 | 3000_Vegetables | Turnip, cooked, from fresh, NS as to fat added in cooking                                                               | 58                 | 4                  | B           | 3             |
| 75234021 | 3000_Vegetables | Turnip, cooked, from fresh, fat added in cooking, NS as to type of fat                                                  | 58                 | 4                  | B           | 3             |
| 75234023 | 3000_Vegetables | Turnip, cooked, from canned, fat added in cooking, NS as to type of fat                                                 | 58                 | 4                  | B           | 3             |
| 75224044 | 3000_Vegetables | Peas, green, cooked, from fresh, made with butter                                                                       | 58                 | 5                  | A           | 2             |
| 75223001 | 3000_Vegetables | Peas, cowpeas, field peas, or blackeye peas, not dried, cooked, from fresh, NS as to fat added in cooking               | 58                 | 5                  | A           | 3             |
| 75216177 | 3000_Vegetables | Corn, yellow and white, cooked, from fresh, made with oil                                                               | 58                 | 4.5                | A           | 2             |
| 71603015 | 3000_Vegetables | Potato salad, made with light mayonnaise                                                                                | 58                 | 4                  | B           | 3             |
| 71603025 | 3000_Vegetables | Potato salad, made with light mayonnaise-type salad dressing                                                            | 58                 | 4                  | B           | 3             |
| 75223000 | 3000_Vegetables | Peas, cowpeas, field peas, or blackeye peas, not dried, cooked, NS as to form, NS as to fat added in cooking            | 58                 | 5                  | A           | 3             |
| 75223020 | 3000_Vegetables | Peas, cowpeas, field peas, or blackeye peas, not dried, cooked, NS as to form, fat added in cooking, NS as to type o    | 58                 | 5                  | A           | 3             |
| 75228022 | 3000_Vegetables | Rutabaga, cooked, made with butter                                                                                      | 58                 | 4                  | B           | 2             |
| 75204035 | 3000_Vegetables | Beans, lima, immature, cooked, from canned, made with margarine                                                         | 58                 | 5                  | A           | 3             |
| 75307000 | 3000_Vegetables | Green peppers and onions, cooked, fat added in cooking, NS as to type of fat                                            | 58                 | 4.5                | B           | 3             |
| 71410000 | 3000_Vegetables | Potato skins without topping                                                                                            | 58                 | 4                  | C           | 2             |
| 71930190 | 3000_Vegetables | Yuca fries                                                                                                              | 58                 | 4                  | C           | 2             |



| foodcode | level1nd        | Description                                                                                                            | Food Compass Score | Health Star Rating | Nutri-Score | NOVA Category |
|----------|-----------------|------------------------------------------------------------------------------------------------------------------------|--------------------|--------------------|-------------|---------------|
| 75216024 | 3000_Vegetables | Corn, cooked, NS as to form, NS as to color, made with oil                                                             | 57                 | 4.5                | A           | 2             |
| 75216131 | 3000_Vegetables | Corn, yellow, cooked, NS as to form, made with oil                                                                     | 57                 | 4.5                | A           | 2             |
| 75216137 | 3000_Vegetables | Corn, yellow, cooked, from frozen, made with oil                                                                       | 57                 | 4.5                | A           | 2             |
| 71701000 | 3000_Vegetables | Potato pancake                                                                                                         | 57                 | 4                  | B           | 2             |
| 75218400 | 3000_Vegetables | Leek, cooked, NS as to fat added in cooking                                                                            | 57                 | 4                  | C           | 3             |
| 75216027 | 3000_Vegetables | Corn, cooked, from fresh, NS as to color, made with oil                                                                | 57                 | 4.5                | A           | 2             |
| 75216134 | 3000_Vegetables | Corn, yellow, cooked, from fresh, made with oil                                                                        | 57                 | 4.5                | A           | 2             |
| 75204010 | 3000_Vegetables | Beans, lima, immature, cooked, NS as to form, fat not added in cooking                                                 | 57                 | 5                  | A           | 1             |
| 75204013 | 3000_Vegetables | Beans, lima, immature, cooked, from canned, fat not added in cooking                                                   | 57                 | 5                  | A           | 1             |
| 75216184 | 3000_Vegetables | Corn, yellow and white, cooked, from frozen, made with oil                                                             | 57                 | 4.5                | A           | 1             |
| 75226022 | 3000_Vegetables | Peppers, green, cooked, made with butter                                                                               | 57                 | 4                  | B           | 2             |
| 75204012 | 3000_Vegetables | Beans, lima, immature, cooked, from frozen, fat not added in cooking                                                   | 57                 | 5                  | A           | 1             |
| 77121110 | 3000_Vegetables | Potato and ham fritters, Puerto Rican style                                                                            | 57                 | 4                  | C           | 2             |
| 75315251 | 3000_Vegetables | Cowpeas with snap beans, cooked, fat added in cooking                                                                  | 57                 | 4.5                | A           | 1             |
| 75302070 | 3000_Vegetables | Beans, string, green, with spaetzel, cooked, fat not added in cooking                                                  | 57                 | 4.5                | A           | 1             |
| 73111203 | 3000_Vegetables | Peas and carrots, cooked, from canned, NS as to fat added in cooking                                                   | 57                 | 4.5                | B           | 3             |
| 73111223 | 3000_Vegetables | Peas and carrots, cooked, from canned, fat added in cooking, NS as to type of fat                                      | 57                 | 4.5                | B           | 3             |
| 75315217 | 3000_Vegetables | Peas and mushrooms, cooked, made with butter                                                                           | 57                 | 4.5                | A           | 1             |
| 75503080 | 3000_Vegetables | Eggplant, pickled                                                                                                      | 57                 | 2.5                | C           | 3             |
| 71103010 | 3000_Vegetables | Potato, boiled, from fresh, peel not eaten, fat not added in cooking                                                   | 57                 | 4.5                | A           | 1             |
| 71104120 | 3000_Vegetables | Potato, roasted, from fresh, peel not eaten, fat not added in cooking                                                  | 57                 | 4.5                | A           | 1             |
| 73402022 | 3000_Vegetables | Sweet potato, baked, peel eaten, made with butter                                                                      | 57                 | 4                  | B           | 2             |
| 75225014 | 3000_Vegetables | Pigeon peas, cooked, NS as to form, NS as to fat added in cooking                                                      | 57                 | 5                  | A           | 3             |
| 75225015 | 3000_Vegetables | Pigeon peas, cooked, NS as to form, fat added in cooking                                                               | 57                 | 5                  | A           | 3             |
| 75225018 | 3000_Vegetables | Pigeon peas, cooked, from canned, NS as to fat added in cooking                                                        | 57                 | 5                  | A           | 3             |
| 75225019 | 3000_Vegetables | Pigeon peas, cooked, from canned, fat added in cooking                                                                 | 57                 | 5                  | A           | 3             |
| 75216227 | 3000_Vegetables | Corn, white, cooked, from fresh, made with oil                                                                         | 56                 | 4.5                | A           | 2             |
| 73403022 | 3000_Vegetables | Sweet potato, baked, peel not eaten, made with butter                                                                  | 56                 | 4                  | B           | 2             |
| 75224048 | 3000_Vegetables | Peas, green, cooked, from frozen, made with margarine                                                                  | 56                 | 5                  | A           | 4             |
| 75200122 | 3000_Vegetables | Vegetables, NS as to type, cooked, made with butter                                                                    | 56                 | 4.5                | A           | 1             |
| 75302513 | 3000_Vegetables | Beans, string, green, and potatoes, cooked, made with margarine                                                        | 56                 | 4.5                | A           | 4             |
| 71603035 | 3000_Vegetables | Potato salad, made with light creamy dressing                                                                          | 56                 | 4.5                | B           | 3             |
| 71603040 | 3000_Vegetables | Potato salad, made with Italian dressing                                                                               | 56                 | 4                  | B           | 3             |
| 71980100 | 3000_Vegetables | Poi                                                                                                                    | 56                 | 4.5                | B           | 1             |
| 75223025 | 3000_Vegetables | Peas, cowpeas, field peas, or blackeye peas, not dried, cooked, NS as to form, made with butter                        | 56                 | 5                  | A           | 1             |
| 75221019 | 3000_Vegetables | Onions, cooked, from fresh, made with margarine                                                                        | 56                 | 4.5                | B           | 4             |
| 73111234 | 3000_Vegetables | Peas and carrots, cooked, from canned, made with butter                                                                | 56                 | 4.5                | B           | 2             |
| 71101000 | 3000_Vegetables | Potato, baked, peel not eaten                                                                                          | 56                 | 4.5                | B           | 1             |
| 71100100 | 3000_Vegetables | Potato, baked, NFS                                                                                                     | 56                 | 4.5                | B           | 1             |
| 71950010 | 3000_Vegetables | Tannier, cooked                                                                                                        | 56                 | 5                  | A           | 1             |
| 74202051 | 3000_Vegetables | Tomatoes, red, from fresh, fried                                                                                       | 56                 | 4                  | C           | 2             |
| 74503009 | 3000_Vegetables | Tomato and corn, cooked, NS as to fat added in cooking                                                                 | 55                 | 4                  | B           | 3             |
| 74503011 | 3000_Vegetables | Tomato and corn, cooked, fat added in cooking                                                                          | 55                 | 4                  | B           | 3             |
| 75234028 | 3000_Vegetables | Turnip, cooked, from fresh, made with butter                                                                           | 55                 | 4                  | B           | 2             |
| 75206040 | 3000_Vegetables | Beans, string, yellow, cooked, from canned, made with butter                                                           | 55                 | 4                  | B           | 3             |
| 73420010 | 3000_Vegetables | Sweet potato tots, from frozen, fried                                                                                  | 55                 | 4                  | C           | 4             |
| 73420030 | 3000_Vegetables | Sweet potato tots, from frozen, NS as to fried or baked                                                                | 55                 | 4                  | C           | 4             |
| 75311025 | 3000_Vegetables | Mixed vegetables, cooked, NS as to form, made with butter                                                              | 55                 | 4.5                | A           | 2             |
| 75311028 | 3000_Vegetables | Mixed vegetables, cooked, from frozen, made with butter                                                                | 55                 | 4.5                | A           | 2             |
| 75306999 | 3000_Vegetables | Green peppers and onions, cooked, NS as to fat added in cooking                                                        | 55                 | 4.5                | B           | 3             |
| 71603020 | 3000_Vegetables | Potato salad, made with mayonnaise-type salad dressing                                                                 | 55                 | 4                  | B           | 3             |
| 75216224 | 3000_Vegetables | Corn, white, cooked, NS as to form, made with oil                                                                      | 55                 | 4.5                | A           | 2             |
| 75216232 | 3000_Vegetables | Corn, white, cooked, from frozen, made with oil                                                                        | 55                 | 4.5                | A           | 2             |
| 71103105 | 3000_Vegetables | Potato, boiled, from fresh, peel eaten, NS as to fat added in cooking                                                  | 55                 | 4.5                | B           | 3             |
| 71103115 | 3000_Vegetables | Potato, boiled, from fresh, peel eaten, fat added in cooking, NS as to type of fat                                     | 55                 | 4.5                | B           | 3             |
| 71104040 | 3000_Vegetables | Potato, roasted, from fresh, peel eaten, NS as to fat added in cooking                                                 | 55                 | 4.5                | B           | 3             |
| 71104060 | 3000_Vegetables | Potato, roasted, from fresh, peel eaten, fat added in cooking, NS as to type of fat                                    | 55                 | 4.5                | B           | 3             |
| 75223031 | 3000_Vegetables | Peas, cowpeas, field peas, or blackeye peas, not dried, cooked, from frozen, made with butter                          | 55                 | 5                  | A           | 2             |
| 75200100 | 3000_Vegetables | Vegetables, NS as to type, cooked, NS as to fat added in cooking                                                       | 55                 | 5                  | A           | 3             |
| 75200120 | 3000_Vegetables | Vegetables, NS as to type, cooked, fat added in cooking, NS as to type of fat                                          | 55                 | 5                  | A           | 3             |
| 75311000 | 3000_Vegetables | Mixed vegetables, cooked, NS as to form, NS as to fat added in cooking                                                 | 55                 | 5                  | A           | 3             |
| 75311002 | 3000_Vegetables | Mixed vegetables, cooked, from frozen, NS as to fat added in cooking                                                   | 55                 | 5                  | A           | 3             |
| 75311020 | 3000_Vegetables | Mixed vegetables, cooked, NS as to form, fat added in cooking, NS as to type of fat                                    | 55                 | 5                  | A           | 3             |
| 75311022 | 3000_Vegetables | Mixed vegetables, cooked, from frozen, fat added in cooking, NS as to type of fat                                      | 55                 | 5                  | A           | 3             |
| 75217000 | 3000_Vegetables | Eggplant, cooked, NS as to fat added in cooking                                                                        | 55                 | 4                  | B           | 3             |
| 75217020 | 3000_Vegetables | Eggplant, cooked, fat added in cooking, NS as to type of fat                                                           | 55                 | 4                  | B           | 3             |
| 75317000 | 3000_Vegetables | Vegetables, stew type, cooked, NS as to fat added in cooking                                                           | 54                 | 4                  | B           | 3             |
| 75317010 | 3000_Vegetables | Vegetables, stew type, cooked, fat added in cooking, NS as to type of fat                                              | 54                 | 4                  | B           | 3             |
| 75229010 | 3000_Vegetables | Salsify, cooked, fat not added in cooking                                                                              | 54                 | 4.5                | A           | 1             |
| 71103320 | 3000_Vegetables | Potato, canned, fat not added in cooking                                                                               | 54                 | 4.5                | A           | 1             |
| 71603045 | 3000_Vegetables | Potato salad, made with light Italian dressing                                                                         | 54                 | 4                  | B           | 2             |
| 75204001 | 3000_Vegetables | Beans, lima, immature, cooked, from fresh, NS as to fat added in cooking                                               | 54                 | 5                  | A           | 3             |
| 75204021 | 3000_Vegetables | Beans, lima, immature, cooked, from fresh, fat added in cooking, NS as to type of fat                                  | 54                 | 5                  | A           | 3             |
| 75204023 | 3000_Vegetables | Beans, lima, immature, cooked, from canned, fat added in cooking, NS as to type of fat                                 | 54                 | 5                  | A           | 3             |
| 75234025 | 3000_Vegetables | Turnip, cooked, from canned, made with butter                                                                          | 54                 | 4                  | B           | 3             |
| 71401031 | 3000_Vegetables | Potato, french fries, restaurant                                                                                       | 54                 | 4                  | B           | 1             |
| 71962040 | 3000_Vegetables | Taro, baked                                                                                                            | 54                 | 4.5                | B           | 1             |
| 75302212 | 3000_Vegetables | Beans, string, green, with onions, cooked, made with butter                                                            | 54                 | 4.5                | B           | 2             |
| 71401000 | 3000_Vegetables | Potato, french fries, NS as to fresh or frozen                                                                         | 54                 | 4                  | C           | 3             |
| 71400990 | 3000_Vegetables | Potato, french fries, NFS                                                                                              | 54                 | 4                  | C           | 3             |
| 73420100 | 3000_Vegetables | Sweet potato tots, fast food / restaurant                                                                              | 54                 | 4                  | C           | 4             |
| 75216029 | 3000_Vegetables | Corn, cooked, from fresh, NS as to color, made with margarine                                                          | 54                 | 4.5                | A           | 1             |
| 71106000 | 3000_Vegetables | Stewed potatoes, Puerto Rican style                                                                                    | 54                 | 4                  | B           | 2             |
| 75204028 | 3000_Vegetables | Beans, lima, immature, cooked, from fresh, made with butter                                                            | 53                 | 5                  | A           | 1             |
| 75208520 | 3000_Vegetables | Breadfruit, fried                                                                                                      | 53                 | 4.5                | B           | 2             |
| 75216211 | 3000_Vegetables | Corn, white, cooked, from fresh, fat not added in cooking                                                              | 53                 | 4.5                | A           | 1             |
| 75208002 | 3000_Vegetables | Beets, cooked, from frozen, NS as to fat added in cooking                                                              | 53                 | 4                  | B           | 1             |
| 75208022 | 3000_Vegetables | Beets, cooked, from frozen, fat added in cooking, NS as to type of fat                                                 | 53                 | 4                  | B           | 1             |
| 71962010 | 3000_Vegetables | Dasheen, boiled                                                                                                        | 53                 | 4.5                | A           | 1             |
| 71102980 | 3000_Vegetables | Potato, boiled, NFS                                                                                                    | 53                 | 4.5                | B           | 3             |
| 71102990 | 3000_Vegetables | Potato, boiled, ready-to-heat                                                                                          | 53                 | 4.5                | B           | 3             |
| 71104030 | 3000_Vegetables | Potato, roasted, NFS                                                                                                   | 53                 | 4.5                | B           | 3             |
| 71104100 | 3000_Vegetables | Potato, roasted, from fresh, peel not eaten, NS as to fat added in cooking                                             | 53                 | 4.5                | B           | 3             |
| 71104110 | 3000_Vegetables | Potato, roasted, from fresh, peel not eaten, fat added in cooking, NS as to type of fat                                | 53                 | 4.5                | B           | 3             |
| 71104200 | 3000_Vegetables | Potato, roasted, ready-to-heat                                                                                         | 53                 | 4.5                | B           | 3             |
| 77121010 | 3000_Vegetables | Fried stuffed potatoes, Puerto Rican style                                                                             | 53                 | 4                  | B           | 2             |
| 71103000 | 3000_Vegetables | Potato, boiled, from fresh, peel not eaten, NS as to fat added in cooking                                              | 53                 | 4.5                | B           | 3             |
| 71000100 | 3000_Vegetables | Potato, NFS                                                                                                            | 53                 | 4.5                | B           | 3             |
| 71103020 | 3000_Vegetables | Potato, boiled, from fresh, peel not eaten, fat added in cooking, NS as to type of fat                                 | 53                 | 4.5                | B           | 3             |
| 75317012 | 3000_Vegetables | Vegetables, stew type, cooked, made with butter                                                                        | 53                 | 4                  | B           | 2             |
| 75216011 | 3000_Vegetables | Corn, cooked, from fresh, NS as to color, fat not added in cooking                                                     | 53                 | 4.5                | A           | 1             |
| 75216111 | 3000_Vegetables | Corn, yellow, cooked, from fresh, fat not added in cooking                                                             | 53                 | 4.5                | A           | 1             |
| 75223021 | 3000_Vegetables | Peas, cowpeas, field peas, or blackeye peas, not dried, cooked, from fresh, fat added in cooking, NS as to type of fat | 53                 | 4.5                | A           | 3             |
| 75216171 | 3000_Vegetables | Corn, yellow and white, cooked, from fresh, fat not added in cooking                                                   | 53                 | 4.5                | A           | 1             |

| foodcode | level1nd        | Description                                                                                                             | Food Compass Score | Health Star Rating | Nutri-Score | NOVA Category |
|----------|-----------------|-------------------------------------------------------------------------------------------------------------------------|--------------------|--------------------|-------------|---------------|
| 75216187 | 3000_Vegetables | Corn, yellow and white, cooked, from canned, made with oil                                                              | 53                 | 4.5                | B           | 1             |
| 75221000 | 3000_Vegetables | Onions, cooked, NS as to form, NS as to fat added in cooking                                                            | 52                 | 4.5                | B           | 3             |
| 75221002 | 3000_Vegetables | Onions, cooked, from frozen, NS as to fat added in cooking                                                              | 52                 | 4.5                | B           | 3             |
| 75221020 | 3000_Vegetables | Onions, cooked, NS as to form, fat added in cooking, NS as to type of fat                                               | 52                 | 4.5                | B           | 3             |
| 75221022 | 3000_Vegetables | Onions, cooked, from frozen, fat added in cooking, NS as to type of fat                                                 | 52                 | 4.5                | B           | 3             |
| 71945010 | 3000_Vegetables | Yam, cooked, Puerto Rican                                                                                               | 52                 | 4.5                | A           | 1             |
| 75223023 | 3000_Vegetables | Peas, cowpeas, field peas, or blackeye peas, not dried, cooked, from canned, fat added in cooking, NS as to type of fat | 52                 | 5                  | A           | 3             |
| 75223003 | 3000_Vegetables | Peas, cowpeas, field peas, or blackeye peas, not dried, cooked, from canned, NS as to fat added in cooking              | 52                 | 5                  | A           | 3             |
| 75216700 | 3000_Vegetables | Cucumber, cooked, NS as to fat added in cooking                                                                         | 52                 | 4                  | C           | 3             |
| 75216720 | 3000_Vegetables | Cucumber, cooked, fat added in cooking, NS as to type of fat                                                            | 52                 | 4                  | C           | 3             |
| 71103300 | 3000_Vegetables | Potato, canned, NS as to fat added in cooking                                                                           | 52                 | 4.5                | B           | 3             |
| 71103310 | 3000_Vegetables | Potato, canned, fat added in cooking, NS as to type of fat                                                              | 52                 | 4.5                | B           | 3             |
| 75534030 | 3000_Vegetables | Turnip, pickled                                                                                                         | 52                 | 4                  | B           | 3             |
| 75315100 | 3000_Vegetables | Peas and onions, cooked, NS as to fat added in cooking                                                                  | 52                 | 4.5                | A           | 3             |
| 75315120 | 3000_Vegetables | Peas and onions, cooked, fat added in cooking, NS as to type of fat                                                     | 52                 | 4.5                | A           | 3             |
| 75216176 | 3000_Vegetables | Corn, yellow and white, cooked, NS as to form, made with margarine                                                      | 52                 | 4.5                | A           | 1             |
| 75216186 | 3000_Vegetables | Corn, yellow and white, cooked, from frozen, made with margarine                                                        | 52                 | 4.5                | A           | 1             |
| 75315023 | 3000_Vegetables | Peas and corn, cooked, made with margarine                                                                              | 52                 | 4.5                | A           | 4             |
| 75224030 | 3000_Vegetables | Peas, green, cooked, NS as to form, fat added in cooking, NS as to type of fat                                          | 52                 | 4.5                | A           | 3             |
| 75216034 | 3000_Vegetables | Corn, cooked, from canned, NS as to color, made with oil                                                                | 52                 | 4                  | B           | 3             |
| 75216141 | 3000_Vegetables | Corn, yellow, cooked, from canned, made with oil                                                                        | 52                 | 4                  | B           | 3             |
| 75208500 | 3000_Vegetables | Breadfruit, cooked, fat not added in cooking                                                                            | 52                 | 4.5                | B           | 1             |
| 75224012 | 3000_Vegetables | Peas, green, cooked, from frozen, NS as to fat added in cooking                                                         | 52                 | 4.5                | A           | 3             |
| 75224032 | 3000_Vegetables | Peas, green, cooked, from frozen, fat added in cooking, NS as to type of fat                                            | 52                 | 4.5                | A           | 3             |
| 74204011 | 3000_Vegetables | Tomatoes, from fresh, stewed                                                                                            | 52                 | 4.5                | B           | 3             |
| 75307002 | 3000_Vegetables | Green peppers and onions, cooked, made with butter                                                                      | 51                 | 4                  | B           | 2             |
| 75208122 | 3000_Vegetables | Beets, cooked, NS as to form, made with butter                                                                          | 51                 | 4                  | B           | 1             |
| 75208125 | 3000_Vegetables | Beets, cooked, from fresh, made with butter                                                                             | 51                 | 4                  | B           | 1             |
| 75208128 | 3000_Vegetables | Beets, cooked, from frozen, made with butter                                                                            | 51                 | 4                  | B           | 1             |
| 75221001 | 3000_Vegetables | Onions, cooked, from fresh, NS as to fat added in cooking                                                               | 51                 | 4.5                | B           | 3             |
| 75221021 | 3000_Vegetables | Onions, cooked, from fresh, fat added in cooking, NS as to type of fat                                                  | 51                 | 4.5                | B           | 3             |
| 75224010 | 3000_Vegetables | Peas, green, cooked, NS as to form, NS as to fat added in cooking                                                       | 51                 | 4.5                | A           | 3             |
| 71601015 | 3000_Vegetables | Potato salad with egg, made with light mayonnaise                                                                       | 51                 | 4.5                | B           | 3             |
| 71601025 | 3000_Vegetables | Potato salad with egg, made with light mayonnaise-type salad dressing                                                   | 51                 | 4.5                | B           | 3             |
| 71106010 | 3000_Vegetables | Potato only from Puerto Rican mixed dishes, gravy and other components reported separately                              | 51                 | 4.5                | B           | 1             |
| 71601040 | 3000_Vegetables | Potato salad with egg, made with Italian dressing                                                                       | 51                 | 4.5                | B           | 2             |
| 75233210 | 3000_Vegetables | Squash, spaghetti, cooked, fat added in cooking, NS as to type of fat                                                   | 51                 | 4                  | B           | 3             |
| 71401033 | 3000_Vegetables | Potato, french fries, school                                                                                            | 51                 | 4                  | B           | 4             |
| 71601035 | 3000_Vegetables | Potato salad with egg, made with light creamy dressing                                                                  | 51                 | 4.5                | B           | 2             |
| 71505020 | 3000_Vegetables | Potato tots, school                                                                                                     | 51                 | 4                  | B           | 4             |
| 75216234 | 3000_Vegetables | Corn, white, cooked, from frozen, made with margarine                                                                   | 51                 | 4.5                | A           | 1             |
| 75330130 | 3000_Vegetables | Vegetable combination, excluding carrots, broccoli, and dark-green leafy; cooked, no sauce, NS as to fat added in c     | 51                 | 4.5                | B           | 3             |
| 75330150 | 3000_Vegetables | Vegetable combination, excluding carrots, broccoli, and dark-green leafy; cooked, no sauce, fat added in cooking, h     | 51                 | 4.5                | B           | 3             |
| 75208000 | 3000_Vegetables | Beets, cooked, NS as to form, NS as to fat added in cooking                                                             | 50                 | 4                  | B           | 3             |
| 75208001 | 3000_Vegetables | Beets, cooked, from fresh, NS as to fat added in cooking                                                                | 50                 | 4                  | B           | 3             |
| 75208020 | 3000_Vegetables | Beets, cooked, NS as to form, fat added in cooking, NS as to type of fat                                                | 50                 | 4                  | B           | 3             |
| 75208021 | 3000_Vegetables | Beets, cooked, from fresh, fat added in cooking, NS as to type of fat                                                   | 50                 | 4                  | B           | 3             |
| 75208003 | 3000_Vegetables | Beets, cooked, from canned, NS as to fat added in cooking                                                               | 50                 | 4                  | C           | 3             |
| 75208023 | 3000_Vegetables | Beets, cooked, from canned, fat added in cooking, NS as to type of fat                                                  | 50                 | 4                  | C           | 3             |
| 75223028 | 3000_Vegetables | Peas, cowpeas, field peas, or blackeye peas, not dried, cooked, from fresh, made with butter                            | 50                 | 4.5                | A           | 2             |
| 73410400 | 3000_Vegetables | Sweet potato fries, fast food / restaurant                                                                              | 50                 | 3.5                | C           | 4             |
| 71601020 | 3000_Vegetables | Potato salad with egg, made with mayonnaise-type salad dressing                                                         | 50                 | 4.5                | B           | 3             |
| 75301110 | 3000_Vegetables | Beans, lima and corn, cooked, fat not added in cooking                                                                  | 50                 | 4.5                | A           | 1             |
| 75216235 | 3000_Vegetables | Corn, white, cooked, from canned, made with oil                                                                         | 50                 | 4.5                | B           | 3             |
| 75224051 | 3000_Vegetables | Peas, green, cooked, from canned, made with margarine                                                                   | 50                 | 4.5                | A           | 4             |
| 75330152 | 3000_Vegetables | Vegetable combination, excluding carrots, broccoli, and dark-green leafy; cooked, no sauce, made with butter            | 50                 | 4.5                | B           | 2             |
| 75315000 | 3000_Vegetables | Peas and corn, cooked, NS as to fat added in cooking                                                                    | 49                 | 4.5                | A           | 3             |
| 75315020 | 3000_Vegetables | Peas and corn, cooked, fat added in cooking, NS as to type of fat                                                       | 49                 | 4.5                | A           | 3             |
| 75315305 | 3000_Vegetables | Peas and potatoes, cooked, NS as to fat added in cooking                                                                | 49                 | 4.5                | A           | 3             |
| 75315310 | 3000_Vegetables | Peas and potatoes, cooked, fat added in cooking, NS as to type of fat                                                   | 49                 | 4.5                | A           | 3             |
| 71404050 | 3000_Vegetables | Potato, hash brown, from school lunch                                                                                   | 49                 | 4.5                | A           | 4             |
| 75302069 | 3000_Vegetables | Beans, string, green, with spaetzel, cooked, NS as to fat added in cooking                                              | 49                 | 4                  | B           | 1             |
| 75302071 | 3000_Vegetables | Beans, string, green, with spaetzel, cooked, fat added in cooking                                                       | 49                 | 4                  | B           | 1             |
| 75223034 | 3000_Vegetables | Peas, cowpeas, field peas, or blackeye peas, not dried, cooked, from canned, made with butter                           | 49                 | 5                  | A           | 2             |
| 75224041 | 3000_Vegetables | Peas, green, cooked, NS as to form, made with butter                                                                    | 49                 | 4.5                | A           | 2             |
| 75224047 | 3000_Vegetables | Peas, green, cooked, from frozen, made with butter                                                                      | 49                 | 4.5                | A           | 2             |
| 75221015 | 3000_Vegetables | Onions, cooked, NS as to form, made with butter                                                                         | 49                 | 4.5                | B           | 2             |
| 71910110 | 3000_Vegetables | Green banana, cooked in salt water                                                                                      | 48                 | 4                  | B           | 1             |
| 75216323 | 3000_Vegetables | Corn, yellow, canned, low sodium, made with margarine                                                                   | 48                 | 4.5                | A           | 4             |
| 75302500 | 3000_Vegetables | Beans, string, green, and potatoes, cooked, NS as to fat added in cooking                                               | 48                 | 4                  | B           | 3             |
| 75302510 | 3000_Vegetables | Beans, string, green, and potatoes, cooked, fat added in cooking, NS as to type of fat                                  | 48                 | 4                  | B           | 3             |
| 71403050 | 3000_Vegetables | Potato, home fries, ready-to-heat                                                                                       | 48                 | 4                  | C           | 4             |
| 75315312 | 3000_Vegetables | Peas and potatoes, cooked, made with butter                                                                             | 48                 | 4.5                | A           | 1             |
| 75221024 | 3000_Vegetables | Onions, cooked, from frozen, made with butter                                                                           | 48                 | 4                  | B           | 1             |
| 75302512 | 3000_Vegetables | Beans, string, green, and potatoes, cooked, made with butter                                                            | 48                 | 4                  | B           | 2             |
| 75216189 | 3000_Vegetables | Corn, yellow and white, cooked, from canned, made with margarine                                                        | 48                 | 4.5                | B           | 1             |
| 73301030 | 3000_Vegetables | Squash, winter type, mashed, fat and sugar added in cooking                                                             | 48                 | 4                  | B           | 3             |
| 75221018 | 3000_Vegetables | Onions, cooked, from fresh, made with butter                                                                            | 48                 | 4                  | C           | 2             |
| 71103150 | 3000_Vegetables | Potato, boiled, from fresh, peel eaten, made with margarine                                                             | 48                 | 4.5                | B           | 4             |
| 71104090 | 3000_Vegetables | Potato, roasted, from fresh, peel eaten, made with margarine                                                            | 48                 | 4.5                | B           | 4             |
| 75216722 | 3000_Vegetables | Cucumber, cooked, made with butter                                                                                      | 48                 | 4                  | C           | 2             |
| 75224013 | 3000_Vegetables | Peas, green, cooked, from canned, NS as to fat added in cooking                                                         | 48                 | 4.5                | A           | 3             |
| 75224033 | 3000_Vegetables | Peas, green, cooked, from canned, fat added in cooking, NS as to type of fat                                            | 48                 | 4.5                | A           | 3             |
| 73303030 | 3000_Vegetables | Squash, winter type, baked, fat and sugar added in cooking                                                              | 48                 | 4                  | B           | 3             |
| 75222022 | 3000_Vegetables | Parsnips, cooked, made with butter                                                                                      | 48                 | 4.5                | B           | 2             |
| 75222000 | 3000_Vegetables | Parsnips, cooked, NS as to fat added in cooking                                                                         | 48                 | 4.5                | B           | 3             |
| 75222020 | 3000_Vegetables | Parsnips, cooked, fat added in cooking, NS as to type of fat                                                            | 48                 | 4.5                | B           | 3             |
| 75515010 | 3000_Vegetables | Vegetable relish                                                                                                        | 48                 | 4                  | C           | 3             |
| 73405022 | 3000_Vegetables | Sweet potato, boiled, made with butter                                                                                  | 47                 | 4                  | C           | 2             |
| 75208131 | 3000_Vegetables | Beets, cooked, from canned, made with butter                                                                            | 47                 | 4                  | C           | 3             |
| 75216010 | 3000_Vegetables | Corn, cooked, NS as to form, NS as to color, fat not added in cooking                                                   | 47                 | 4.5                | A           | 1             |
| 75216012 | 3000_Vegetables | Corn, cooked, from frozen, NS as to color, fat not added in cooking                                                     | 47                 | 4.5                | A           | 1             |
| 75216110 | 3000_Vegetables | Corn, yellow, cooked, NS as to form, fat not added in cooking                                                           | 47                 | 4.5                | A           | 1             |
| 75216112 | 3000_Vegetables | Corn, yellow, cooked, from frozen, fat not added in cooking                                                             | 47                 | 4.5                | A           | 1             |
| 75204032 | 3000_Vegetables | Beans, lima, immature, cooked, from frozen, made with margarine                                                         | 47                 | 5                  | A           | 4             |
| 75229009 | 3000_Vegetables | Salsify, cooked, NS as to fat added in cooking                                                                          | 47                 | 4.5                | B           | 1             |
| 75229011 | 3000_Vegetables | Salsify, cooked, fat added in cooking                                                                                   | 47                 | 4.5                | B           | 1             |
| 75209500 | 3000_Vegetables | Burdock, cooked, fat not added in cooking                                                                               | 47                 | 4                  | B           | 1             |
| 75204020 | 3000_Vegetables | Beans, lima, immature, cooked, NS as to form, fat added in cooking, NS as to type of fat                                | 47                 | 5                  | A           | 1             |
| 75315122 | 3000_Vegetables | Peas and onions, cooked, made with butter                                                                               | 47                 | 4.5                | B           | 1             |
| 71905010 | 3000_Vegetables | Ripe plantain, boiled                                                                                                   | 47                 | 4                  | C           | 1             |
| 71103050 | 3000_Vegetables | Potato, boiled, from fresh, peel not eaten, made with margarine                                                         | 47                 | 4.5                | B           | 4             |
| 71104150 | 3000_Vegetables | Potato, roasted, from fresh, peel not eaten, made with margarine                                                        | 47                 | 4.5                | B           | 4             |
| 71601045 | 3000_Vegetables | Potato salad with egg, made with light Italian dressing                                                                 | 46                 | 4.5                | B           | 2             |

| foodcode | level1nd        | Description                                                                                                         | Food Compass Score | Health Star Rating | Nutri-Score | NOVA Category |
|----------|-----------------|---------------------------------------------------------------------------------------------------------------------|--------------------|--------------------|-------------|---------------|
| 71402500 | 3000_Vegetables | Potato, french fries, with cheese                                                                                   | 46                 | 4                  | C           | 2             |
| 71405019 | 3000_Vegetables | Potato, hash brown, from fresh, with cheese                                                                         | 46                 | 4                  | C           | 2             |
| 71410500 | 3000_Vegetables | Potato skins, with cheese                                                                                           | 46                 | 4                  | C           | 2             |
| 71970110 | 3000_Vegetables | Starchy vegetables, NFS, Puerto Rican style                                                                         | 45                 | 4.5                | A           | 1             |
| 71970120 | 3000_Vegetables | Starchy vegetables, including tannier, white sweet potato and yam, with green or ripe plantains, Puerto Rican style | 45                 | 4.5                | A           | 1             |
| 75216170 | 3000_Vegetables | Corn, yellow and white, cooked, NS as to form, fat not added in cooking                                             | 45                 | 4.5                | A           | 1             |
| 75216172 | 3000_Vegetables | Corn, yellow and white, cooked, from frozen, fat not added in cooking                                               | 45                 | 4.5                | A           | 1             |
| 71401032 | 3000_Vegetables | Potato, french fries, from frozen, fried                                                                            | 45                 | 4                  | C           | 4             |
| 71602010 | 3000_Vegetables | Potato salad, German style                                                                                          | 45                 | 4.5                | B           | 2             |
| 71930130 | 3000_Vegetables | Cassava, cooked, made with oil                                                                                      | 45                 | 4                  | B           | 2             |
| 71970130 | 3000_Vegetables | Starchy vegetables, including tannier, white sweet potato and yam, no plantain, Puerto Rican style                  | 45                 | 4.5                | A           | 1             |
| 75216237 | 3000_Vegetables | Corn, white, cooked, from canned, made with margarine                                                               | 45                 | 4.5                | B           | 3             |
| 71970200 | 3000_Vegetables | Fufu                                                                                                                | 45                 | 4.5                | A           | 4             |
| 75232222 | 3000_Vegetables | Squash, spaghetti, cooked, made with butter                                                                         | 45                 | 4                  | B           | 2             |
| 75216300 | 3000_Vegetables | Corn, yellow, canned, low sodium, NS as to fat added in cooking                                                     | 45                 | 4.5                | A           | 3             |
| 75216320 | 3000_Vegetables | Corn, yellow, canned, low sodium, fat added in cooking, NS as to type of fat                                        | 45                 | 4.5                | A           | 3             |
| 71404000 | 3000_Vegetables | Potato, hash brown, NFS                                                                                             | 45                 | 4                  | B           | 4             |
| 71405040 | 3000_Vegetables | Potato, hash brown, ready-to-heat                                                                                   | 45                 | 4                  | B           | 4             |
| 71405030 | 3000_Vegetables | Potato, hash brown, from dry mix                                                                                    | 45                 | 4                  | B           | 4             |
| 75315022 | 3000_Vegetables | Peas and corn, cooked, made with butter                                                                             | 45                 | 4.5                | A           | 2             |
| 75204022 | 3000_Vegetables | Beans, lima, immature, cooked, from frozen, fat added in cooking, NS as to type of fat                              | 45                 | 5                  | A           | 3             |
| 73102240 | 3000_Vegetables | Carrots, cooked, NS as to form, glazed                                                                              | 44                 | 4                  | B           | 2             |
| 75204000 | 3000_Vegetables | Beans, lima, immature, cooked, NS as to form, NS as to fat added in cooking                                         | 44                 | 5                  | A           | 3             |
| 75204003 | 3000_Vegetables | Beans, lima, immature, cooked, from canned, NS as to fat added in cooking                                           | 44                 | 5                  | A           | 3             |
| 75204002 | 3000_Vegetables | Beans, lima, immature, cooked, from frozen, NS as to fat added in cooking                                           | 44                 | 5                  | A           | 3             |
| 75217022 | 3000_Vegetables | Eggplant, cooked, made with butter                                                                                  | 44                 | 4                  | B           | 2             |
| 71901110 | 3000_Vegetables | Fried green plantain, Puerto Rican style                                                                            | 44                 | 2                  | D           | 2             |
| 75303000 | 3000_Vegetables | Corn with peppers, red or green, cooked, NS as to fat added in cooking                                              | 44                 | 4.5                | B           | 3             |
| 75303020 | 3000_Vegetables | Corn with peppers, red or green, cooked, fat added in cooking, NS as to type of fat                                 | 44                 | 4.5                | B           | 3             |
| 75224050 | 3000_Vegetables | Peas, green, cooked, from canned, made with butter                                                                  | 44                 | 4.5                | A           | 2             |
| 71106070 | 3000_Vegetables | Potato from Puerto Rican chicken fricassee, with sauce                                                              | 44                 | 4.5                | B           | 2             |
| 75204025 | 3000_Vegetables | Beans, lima, immature, cooked, NS as to form, made with butter                                                      | 43                 | 5                  | A           | 1             |
| 75216212 | 3000_Vegetables | Corn, white, cooked, from frozen, fat not added in cooking                                                          | 43                 | 4.5                | A           | 1             |
| 75216210 | 3000_Vegetables | Corn, white, cooked, NS as to form, fat not added in cooking                                                        | 43                 | 4.5                | A           | 1             |
| 75301100 | 3000_Vegetables | Beans, lima and corn, cooked, NS as to fat added in cooking                                                         | 43                 | 4.5                | A           | 1             |
| 71402510 | 3000_Vegetables | Potato, french fries, with chili and cheese                                                                         | 43                 | 4                  | C           | 3             |
| 75216070 | 3000_Vegetables | Corn, dried, cooked                                                                                                 | 43                 | 4                  | B           | 3             |
| 75216013 | 3000_Vegetables | Corn, cooked, from canned, NS as to color, fat not added in cooking                                                 | 42                 | 4.5                | B           | 3             |
| 75216113 | 3000_Vegetables | Corn, yellow, cooked, from canned, fat not added in cooking                                                         | 42                 | 4.5                | B           | 3             |
| 75216161 | 3000_Vegetables | Corn, yellow and white, cooked, from fresh, NS as to fat added in cooking                                           | 42                 | 4.5                | B           | 1             |
| 75204031 | 3000_Vegetables | Beans, lima, immature, cooked, from frozen, made with butter                                                        | 42                 | 5                  | A           | 2             |
| 75301123 | 3000_Vegetables | Beans, lima and corn, cooked, made with margarine                                                                   | 42                 | 4.5                | A           | 4             |
| 75216213 | 3000_Vegetables | Corn, white, cooked, from canned, fat not added in cooking                                                          | 42                 | 4.5                | A           | 3             |
| 71411000 | 3000_Vegetables | Potato skins, with cheese and bacon                                                                                 | 42                 | 4                  | C           | 3             |
| 75208499 | 3000_Vegetables | Breadfruit, cooked, NS as to fat added in cooking                                                                   | 42                 | 4.5                | B           | 1             |
| 75208501 | 3000_Vegetables | Breadfruit, cooked, fat added in cooking                                                                            | 42                 | 4.5                | B           | 1             |
| 73102241 | 3000_Vegetables | Carrots, cooked, from fresh, glazed                                                                                 | 42                 | 4                  | C           | 2             |
| 75216173 | 3000_Vegetables | Corn, yellow and white, cooked, from canned, fat not added in cooking                                               | 42                 | 4.5                | B           | 3             |
| 71505030 | 3000_Vegetables | Potato tots, from fresh, fried or baked                                                                             | 41                 | 4                  | C           | 3             |
| 71505000 | 3000_Vegetables | Potato tots, NFS                                                                                                    | 41                 | 4                  | C           | 3             |
| 75216179 | 3000_Vegetables | Corn, yellow and white, cooked, from fresh, made with margarine                                                     | 41                 | 4.5                | A           | 4             |
| 71401041 | 3000_Vegetables | Potato, french fries, with cheese, school                                                                           | 41                 | 4                  | B           | 4             |
| 75216026 | 3000_Vegetables | Corn, cooked, NS as to form, NS as to color, made with margarine                                                    | 41                 | 4.5                | A           | 4             |
| 75216033 | 3000_Vegetables | Corn, cooked, from frozen, NS as to color, made with margarine                                                      | 41                 | 4.5                | A           | 4             |
| 75216133 | 3000_Vegetables | Corn, yellow, cooked, NS as to form, made with margarine                                                            | 41                 | 4.5                | A           | 4             |
| 75216139 | 3000_Vegetables | Corn, yellow, cooked, from frozen, made with margarine                                                              | 41                 | 4.5                | A           | 4             |
| 71103140 | 3000_Vegetables | Potato, boiled, from fresh, peel eaten, made with butter                                                            | 41                 | 4                  | B           | 2             |
| 71104080 | 3000_Vegetables | Potato, roasted, from fresh, peel eaten, made with butter                                                           | 41                 | 4                  | B           | 2             |
| 75204034 | 3000_Vegetables | Beans, lima, immature, cooked, from canned, made with butter                                                        | 41                 | 5                  | A           | 3             |
| 71401030 | 3000_Vegetables | Potato, french fries, fast food                                                                                     | 41                 | 4.5                | B           | 4             |
| 75301120 | 3000_Vegetables | Beans, lima and corn, cooked, fat added in cooking, NS as to type of fat                                            | 41                 | 4.5                | A           | 3             |
| 75216136 | 3000_Vegetables | Corn, yellow, cooked, from fresh, made with margarine                                                               | 40                 | 4.5                | A           | 4             |
| 73409000 | 3000_Vegetables | Sweet potato, casserole or mashed                                                                                   | 40                 | 4                  | B           | 2             |
| 71501011 | 3000_Vegetables | Potato, mashed, from fresh, made with milk, with cheese                                                             | 40                 | 4                  | C           | 3             |
| 73102242 | 3000_Vegetables | Carrots, cooked, from frozen, glazed                                                                                | 40                 | 4                  | C           | 2             |
| 75216229 | 3000_Vegetables | Corn, white, cooked, from fresh, made with margarine                                                                | 40                 | 4.5                | A           | 4             |
| 75216322 | 3000_Vegetables | Corn, yellow, canned, low sodium, made with butter                                                                  | 40                 | 4.5                | B           | 2             |
| 71603050 | 3000_Vegetables | Potato salad, made with any type of fat free dressing                                                               | 40                 | 4                  | B           | 3             |
| 71508005 | 3000_Vegetables | Potato, baked, peel eaten, with butter                                                                              | 40                 | 4                  | B           | 2             |
| 75216201 | 3000_Vegetables | Corn, white, cooked, from fresh, NS as to fat added in cooking                                                      | 40                 | 4.5                | B           | 3             |
| 75216221 | 3000_Vegetables | Corn, white, cooked, from fresh, fat added in cooking, NS as to type of fat                                         | 40                 | 4.5                | B           | 3             |
| 75216181 | 3000_Vegetables | Corn, yellow and white, cooked, from fresh, fat added in cooking, NS as to type of fat                              | 39                 | 4.5                | B           | 3             |
| 75303022 | 3000_Vegetables | Corn with peppers, red or green, cooked, made with butter                                                           | 39                 | 4.5                | B           | 2             |
| 71501018 | 3000_Vegetables | Potato, mashed, from school lunch                                                                                   | 39                 | 4.5                | B           | 4             |
| 75216001 | 3000_Vegetables | Corn, cooked, from fresh, NS as to color, NS as to fat added in cooking                                             | 39                 | 4.5                | A           | 3             |
| 75216021 | 3000_Vegetables | Corn, cooked, from fresh, NS as to color, fat added in cooking, NS as to type of fat                                | 39                 | 4.5                | A           | 3             |
| 75216101 | 3000_Vegetables | Corn, yellow, cooked, from fresh, NS as to fat added in cooking                                                     | 39                 | 4.5                | A           | 3             |
| 75216121 | 3000_Vegetables | Corn, yellow, cooked, from fresh, fat added in cooking, NS as to type of fat                                        | 39                 | 4.5                | A           | 3             |
| 71404040 | 3000_Vegetables | Potato, hash brown, from restaurant, with cheese                                                                    | 39                 | 3.5                | D           | 3             |
| 71103040 | 3000_Vegetables | Potato, boiled, from fresh, peel not eaten, made with butter                                                        | 39                 | 4                  | C           | 2             |
| 71104140 | 3000_Vegetables | Potato, roasted, from fresh, peel not eaten, made with butter                                                       | 39                 | 4                  | C           | 2             |
| 75216160 | 3000_Vegetables | Corn, yellow and white, cooked, NS as to form, NS as to fat added in cooking                                        | 39                 | 4.5                | B           | 1             |
| 71601010 | 3000_Vegetables | Potato salad with egg, made with mayonnaise                                                                         | 39                 | 4                  | C           | 4             |
| 71305015 | 3000_Vegetables | Potato, scalloped, NFS                                                                                              | 39                 | 3.5                | C           | 3             |
| 71305030 | 3000_Vegetables | Potato, scalloped, from fresh                                                                                       | 39                 | 3.5                | C           | 3             |
| 71404010 | 3000_Vegetables | Potato, hash brown, from fast food                                                                                  | 39                 | 3.5                | C           | 4             |
| 71404030 | 3000_Vegetables | Potato, hash brown, from restaurant                                                                                 | 39                 | 3.5                | C           | 4             |
| 71503010 | 3000_Vegetables | Potato patty                                                                                                        | 39                 | 3.5                | C           | 2             |
| 71508035 | 3000_Vegetables | Potato, baked, peel eaten, with vegetables                                                                          | 38                 | 4                  | B           | 2             |
| 75216000 | 3000_Vegetables | Corn, cooked, NS as to form, NS as to color, NS as to fat added in cooking                                          | 38                 | 4.5                | B           | 3             |
| 75216002 | 3000_Vegetables | Corn, cooked, from frozen, NS as to color, NS as to fat added in cooking                                            | 38                 | 4.5                | B           | 3             |
| 75216020 | 3000_Vegetables | Corn, cooked, NS as to form, NS as to color, fat added in cooking, NS as to type of fat                             | 38                 | 4.5                | B           | 3             |
| 75216022 | 3000_Vegetables | Corn, cooked, from frozen, NS as to color, fat added in cooking, NS as to type of fat                               | 38                 | 4.5                | B           | 3             |
| 75216100 | 3000_Vegetables | Corn, yellow, cooked, NS as to form, NS as to fat added in cooking                                                  | 38                 | 4.5                | B           | 3             |
| 75216102 | 3000_Vegetables | Corn, yellow, cooked, from frozen, NS as to fat added in cooking                                                    | 38                 | 4.5                | B           | 3             |
| 75216120 | 3000_Vegetables | Corn, yellow, cooked, NS as to form, fat added in cooking, NS as to type of fat                                     | 38                 | 4.5                | B           | 3             |
| 75216122 | 3000_Vegetables | Corn, yellow, cooked, from frozen, fat added in cooking, NS as to type of fat                                       | 38                 | 4.5                | B           | 3             |
| 71507005 | 3000_Vegetables | Potato, baked, peel not eaten, with butter                                                                          | 38                 | 4                  | C           | 2             |
| 71508010 | 3000_Vegetables | Potato, baked, peel eaten, with sour cream                                                                          | 38                 | 4                  | C           | 2             |
| 71601050 | 3000_Vegetables | Potato salad with egg, made with any type of fat free dressing                                                      | 38                 | 4.5                | B           | 2             |
| 75301122 | 3000_Vegetables | Beans, lima and corn, cooked, made with butter                                                                      | 38                 | 4.5                | A           | 1             |
| 75216226 | 3000_Vegetables | Corn, white, cooked, NS as to form, made with margarine                                                             | 38                 | 4.5                | A           | 4             |
| 71501013 | 3000_Vegetables | Potato, mashed, from fresh, NFS                                                                                     | 37                 | 4                  | C           | 3             |
| 71501010 | 3000_Vegetables | Potato, mashed, from fresh, made with milk                                                                          | 37                 | 4                  | C           | 3             |

| foodcode | level1nd        | Description                                                                               | Food Compass Score | Health Star Rating | Nutri-Score | NOVA Category |
|----------|-----------------|-------------------------------------------------------------------------------------------|--------------------|--------------------|-------------|---------------|
| 71401020 | 3000_Vegetables | Potato, french fries, from frozen, baked                                                  | 37                 | 4.5                | B           | 4             |
| 71305040 | 3000_Vegetables | Potato, scalloped, from fresh, with meat                                                  | 37                 | 3.5                | C           | 3             |
| 71501045 | 3000_Vegetables | Potato, mashed, from dry mix, made with milk, with cheese                                 | 37                 | 3.5                | C           | 3             |
| 71501000 | 3000_Vegetables | Potato, mashed, NFS                                                                       | 37                 | 4                  | C           | 3             |
| 71106020 | 3000_Vegetables | Potato from Puerto Rican style stuffed pot roast, with gravy                              | 37                 | 4.5                | B           | 2             |
| 71106050 | 3000_Vegetables | Potato from Puerto Rican beef stew, with gravy                                            | 37                 | 4.5                | B           | 2             |
| 71507035 | 3000_Vegetables | Potato, baked, peel not eaten, with vegetables                                            | 37                 | 4                  | C           | 2             |
| 71507010 | 3000_Vegetables | Potato, baked, peel not eaten, with sour cream                                            | 37                 | 4                  | C           | 2             |
| 71402520 | 3000_Vegetables | Potato, french fries, with chili                                                          | 37                 | 4                  | B           | 4             |
| 71508030 | 3000_Vegetables | Potato, baked, peel eaten, with chili                                                     | 37                 | 4                  | C           | 2             |
| 71401045 | 3000_Vegetables | Potato, french fries, with chili, fast food / restaurant                                  | 37                 | 4                  | B           | 4             |
| 75216162 | 3000_Vegetables | Corn, yellow and white, cooked, from frozen, NS as to fat added in cooking                | 36                 | 4.5                | B           | 3             |
| 75216180 | 3000_Vegetables | Corn, yellow and white, cooked, NS as to form, fat added in cooking, NS as to type of fat | 36                 | 4.5                | B           | 3             |
| 75216182 | 3000_Vegetables | Corn, yellow and white, cooked, from frozen, fat added in cooking, NS as to type of fat   | 36                 | 4.5                | B           | 3             |
| 71305050 | 3000_Vegetables | Potato, scalloped, from dry mix                                                           | 36                 | 3.5                | C           | 3             |
| 71508020 | 3000_Vegetables | Potato, baked, peel eaten, with cheese                                                    | 36                 | 4                  | C           | 2             |
| 71305070 | 3000_Vegetables | Potato, scalloped, ready-to-heat                                                          | 36                 | 3.5                | D           | 3             |
| 75216036 | 3000_Vegetables | Corn, cooked, from canned, NS as to color, made with margarine                            | 36                 | 4.5                | B           | 4             |
| 75216143 | 3000_Vegetables | Corn, yellow, cooked, from canned, made with margarine                                    | 36                 | 4.5                | B           | 4             |
| 75216228 | 3000_Vegetables | Corn, white, cooked, from fresh, made with butter                                         | 35                 | 4.5                | B           | 2             |
| 71702000 | 3000_Vegetables | Potato pudding                                                                            | 35                 | 3.5                | C           | 3             |
| 71507030 | 3000_Vegetables | Potato, baked, peel not eaten, with chili                                                 | 35                 | 4                  | C           | 2             |
| 71305080 | 3000_Vegetables | Potato, scalloped, ready-to-heat, with meat                                               | 35                 | 3                  | D           | 3             |
| 75216178 | 3000_Vegetables | Corn, yellow and white, cooked, from fresh, made with butter                              | 35                 | 4.5                | B           | 2             |
| 75216203 | 3000_Vegetables | Corn, white, cooked, from canned, NS as to fat added in cooking                           | 35                 | 4                  | B           | 1             |
| 71305060 | 3000_Vegetables | Potato, scalloped, from dry mix, with meat                                                | 35                 | 3                  | D           | 3             |
| 75216028 | 3000_Vegetables | Corn, cooked, from fresh, NS as to color, made with butter                                | 35                 | 4.5                | A           | 2             |
| 75216135 | 3000_Vegetables | Corn, yellow, cooked, from fresh, made with butter                                        | 35                 | 4.5                | A           | 2             |
| 75216032 | 3000_Vegetables | Corn, cooked, from frozen, NS as to color, made with butter                               | 35                 | 4.5                | B           | 1             |
| 75216175 | 3000_Vegetables | Corn, yellow and white, cooked, NS as to form, made with butter                           | 35                 | 4.5                | B           | 1             |
| 71508025 | 3000_Vegetables | Potato, baked, peel eaten, with meat                                                      | 35                 | 4                  | C           | 2             |
| 75216200 | 3000_Vegetables | Corn, white, cooked, NS as to form, NS as to fat added in cooking                         | 35                 | 4.5                | B           | 3             |
| 75216202 | 3000_Vegetables | Corn, white, cooked, from frozen, NS as to fat added in cooking                           | 35                 | 4.5                | B           | 3             |
| 75216220 | 3000_Vegetables | Corn, white, cooked, NS as to form, fat added in cooking, NS as to type of fat            | 35                 | 4.5                | B           | 3             |
| 75216222 | 3000_Vegetables | Corn, white, cooked, from frozen, fat added in cooking, NS as to type of fat              | 35                 | 4.5                | B           | 3             |
| 73406000 | 3000_Vegetables | Sweet potato, candied                                                                     | 34                 | 3.5                | C           | 3             |
| 71507020 | 3000_Vegetables | Potato, baked, peel not eaten, with cheese                                                | 34                 | 4                  | C           | 2             |
| 75500210 | 3000_Vegetables | Beets, pickled                                                                            | 34                 | 4                  | B           | 3             |
| 71305020 | 3000_Vegetables | Potato, scalloped, from fast food or restaurant                                           | 34                 | 3                  | D           | 3             |
| 71401039 | 3000_Vegetables | Potato, french fries, with cheese, fast food / restaurant                                 | 34                 | 4                  | C           | 4             |
| 75216003 | 3000_Vegetables | Corn, cooked, from canned, NS as to color, NS as to fat added in cooking                  | 34                 | 4                  | B           | 3             |
| 75216023 | 3000_Vegetables | Corn, cooked, from canned, NS as to color, fat added in cooking, NS as to type of fat     | 34                 | 4                  | B           | 3             |
| 75216103 | 3000_Vegetables | Corn, yellow, cooked, from canned, NS as to fat added in cooking                          | 34                 | 4                  | B           | 3             |
| 75216123 | 3000_Vegetables | Corn, yellow, cooked, from canned, fat added in cooking, NS as to type of fat             | 34                 | 4                  | B           | 3             |
| 71930100 | 3000_Vegetables | Cassava, cooked, fat not added in cooking                                                 | 34                 | 4                  | B           | 1             |
| 71411100 | 3000_Vegetables | Potato skins, NFS                                                                         | 34                 | 4                  | C           | 4             |
| 75216025 | 3000_Vegetables | Corn, cooked, NS as to form, NS as to color, made with butter                             | 34                 | 4.5                | B           | 2             |
| 75216132 | 3000_Vegetables | Corn, yellow, cooked, NS as to form, made with butter                                     | 34                 | 4.5                | B           | 2             |
| 75216138 | 3000_Vegetables | Corn, yellow, cooked, from frozen, made with butter                                       | 34                 | 4.5                | B           | 2             |
| 71905210 | 3000_Vegetables | Candied ripe plantain, Puerto Rican style                                                 | 33                 | 3                  | D           | 3             |
| 71507025 | 3000_Vegetables | Potato, baked, peel not eaten, with meat                                                  | 33                 | 4                  | C           | 2             |
| 75216185 | 3000_Vegetables | Corn, yellow and white, cooked, from frozen, made with butter                             | 33                 | 4.5                | B           | 1             |
| 75216163 | 3000_Vegetables | Corn, yellow and white, cooked, from canned, NS as to fat added in cooking                | 33                 | 4                  | B           | 3             |
| 75216183 | 3000_Vegetables | Corn, yellow and white, cooked, from canned, fat added in cooking, NS as to type of fat   | 33                 | 4                  | B           | 3             |
| 71501016 | 3000_Vegetables | Potato, mashed, from restaurant                                                           | 33                 | 4                  | C           | 3             |
| 71501012 | 3000_Vegetables | Potato, mashed, from fresh, made with milk, with gravy                                    | 33                 | 4                  | B           | 3             |
| 73102243 | 3000_Vegetables | Carrots, cooked, from canned, glazed                                                      | 33                 | 3.5                | C           | 2             |
| 71401050 | 3000_Vegetables | Potato, french fries, with chili and cheese, fast food / restaurant                       | 33                 | 4                  | C           | 4             |
| 71501005 | 3000_Vegetables | Potato, mashed, from fast food                                                            | 33                 | 4                  | B           | 4             |
| 75216223 | 3000_Vegetables | Corn, white, cooked, from canned, fat added in cooking, NS as to type of fat              | 32                 | 4                  | B           | 3             |
| 71405050 | 3000_Vegetables | Potato, hash brown, ready-to-heat, with cheese                                            | 32                 | 4                  | C           | 4             |
| 75216225 | 3000_Vegetables | Corn, white, cooked, NS as to form, made with butter                                      | 32                 | 4.5                | B           | 1             |
| 75501010 | 3000_Vegetables | Corn relish                                                                               | 32                 | 4                  | C           | 3             |
| 71501035 | 3000_Vegetables | Potato, mashed, from dry mix, NFS                                                         | 31                 | 4                  | C           | 3             |
| 71403030 | 3000_Vegetables | Potato, home fries, from restaurant / fast food                                           | 31                 | 3.5                | C           | 4             |
| 71501040 | 3000_Vegetables | Potato, mashed, from dry mix, made with milk                                              | 31                 | 4                  | C           | 3             |
| 75216193 | 3000_Vegetables | Corn, yellow, from canned, cream style, fat added in cooking                              | 31                 | 4                  | B           | 3             |
| 71505050 | 3000_Vegetables | Potato tots, frozen, fried                                                                | 31                 | 4                  | C           | 4             |
| 71505060 | 3000_Vegetables | Potato tots, frozen, NS as to fried or baked                                              | 31                 | 4                  | C           | 4             |
| 75216233 | 3000_Vegetables | Corn, white, cooked, from frozen, made with butter                                        | 31                 | 4.5                | B           | 2             |
| 71501017 | 3000_Vegetables | Potato, mashed, from restaurant, with gravy                                               | 30                 | 3.5                | C           | 3             |
| 75216035 | 3000_Vegetables | Corn, cooked, from canned, NS as to color, made with butter                               | 29                 | 4                  | B           | 2             |
| 75216142 | 3000_Vegetables | Corn, yellow, cooked, from canned, made with butter                                       | 29                 | 4                  | B           | 2             |
| 75216190 | 3000_Vegetables | Corn, yellow, NS as to form, cream style, fat added in cooking                            | 29                 | 4                  | C           | 3             |
| 71404020 | 3000_Vegetables | Potato, hash brown, from fast food, with cheese                                           | 29                 | 3.5                | D           | 4             |
| 75216188 | 3000_Vegetables | Corn, yellow and white, cooked, from canned, made with butter                             | 28                 | 4                  | B           | 2             |
| 71501071 | 3000_Vegetables | Potato, mashed, ready-to-heat, with cheese                                                | 28                 | 4                  | C           | 4             |
| 71501054 | 3000_Vegetables | Potato, mashed, from dry mix, made with milk, with gravy                                  | 28                 | 4                  | C           | 3             |
| 71930150 | 3000_Vegetables | Cassava, cooked, made with margarine                                                      | 28                 | 4                  | B           | 4             |
| 71501006 | 3000_Vegetables | Potato, mashed, from fast food, with gravy                                                | 27                 | 4                  | C           | 4             |
| 71962020 | 3000_Vegetables | Dasheen, fried                                                                            | 27                 | 4                  | C           | 4             |
| 75415021 | 3000_Vegetables | Onion rings, from fresh, batter-dipped, baked or fried                                    | 27                 | 3                  | C           | 4             |
| 75216236 | 3000_Vegetables | Corn, white, cooked, from canned, made with butter                                        | 26                 | 4                  | B           | 3             |
| 71930090 | 3000_Vegetables | Cassava, cooked, NS as to fat added in cooking                                            | 25                 | 4                  | C           | 3             |
| 71930120 | 3000_Vegetables | Cassava, cooked, fat added in cooking, NS as to type of fat                               | 25                 | 4                  | C           | 3             |
| 71930140 | 3000_Vegetables | Cassava, cooked, made with butter                                                         | 24                 | 4                  | C           | 2             |
| 74205010 | 3000_Vegetables | Tomatoes, green, cooked, NS as to form                                                    | 24                 | 3.5                | C           | 3             |
| 75216053 | 3000_Vegetables | Corn, from canned, NS as to color, cream style                                            | 23                 | 4.5                | B           | 4             |
| 75216153 | 3000_Vegetables | Corn, yellow, from canned, cream style                                                    | 23                 | 4.5                | B           | 4             |
| 71505040 | 3000_Vegetables | Potato tots, frozen, baked                                                                | 23                 | 4                  | C           | 4             |
| 75503100 | 3000_Vegetables | Mustard pickles                                                                           | 23                 | 3.5                | C           | 3             |
| 75415022 | 3000_Vegetables | Onion rings, from frozen, batter-dipped, baked or fried                                   | 22                 | 1.5                | D           | 4             |
| 71505010 | 3000_Vegetables | Potato tots, fast food / restaurant                                                       | 22                 | 3.5                | C           | 4             |
| 75216050 | 3000_Vegetables | Corn, NS as to form, NS as to color, cream style                                          | 21                 | 4                  | B           | 4             |
| 75216150 | 3000_Vegetables | Corn, yellow, NS as to form, cream style                                                  | 21                 | 4                  | B           | 4             |
| 71501007 | 3000_Vegetables | Potato, mashed, ready-to-heat                                                             | 21                 | 4                  | C           | 4             |
| 71501061 | 3000_Vegetables | Potato, mashed, ready-to-heat, NFS                                                        | 21                 | 4                  | C           | 4             |
| 75503140 | 3000_Vegetables | Cucumber pickles, sweet, reduced salt                                                     | 20                 | 4                  | C           | 4             |
| 75216253 | 3000_Vegetables | Corn, white, from canned, cream style                                                     | 20                 | 4                  | B           | 4             |
| 75415020 | 3000_Vegetables | Onion rings, NS as to form, batter-dipped, baked or fried                                 | 20                 | 3                  | C           | 4             |
| 91408100 | 3000_Vegetables | Chinese preserved sweet vegetable                                                         | 19                 | 0.5                | D           | 2             |
| 71501075 | 3000_Vegetables | Potato, mashed, ready-to-heat, with gravy                                                 | 18                 | 4                  | C           | 4             |
| 75216250 | 3000_Vegetables | Corn, white, NS as to form, cream style                                                   | 18                 | 4                  | C           | 4             |
| 71701500 | 3000_Vegetables | Lefse (Norwegian)                                                                         | 18                 | 4                  | B           | 3             |

| <b>foodcode</b> | <b>level1nd</b> | <b>Description</b>                  | <b>Food Compass Score</b> | <b>Health Star Rating</b> | <b>Nutri-Score</b> | <b>NOVA Category</b> |
|-----------------|-----------------|-------------------------------------|---------------------------|---------------------------|--------------------|----------------------|
| 74202050        | 3000_Vegetables | Tomatoes, red, NS as to form, fried | 17                        | 3.5                       | C                  | 3                    |
| 75513010        | 3000_Vegetables | Seaweed, pickled                    | 16                        | 3.5                       | C                  | 3                    |
| 75503040        | 3000_Vegetables | Cucumber pickles, sweet             | 7                         | 3.5                       | C                  | 4                    |
| 75503020        | 3000_Vegetables | Cucumber pickles, relish            | 1                         | 2.5                       | D                  | 4                    |
| 75511200        | 3000_Vegetables | Pickles, mixed                      | 1                         | 2.5                       | D                  | 4                    |

| foodcode | level1nd    | Description                                                                                  | Food Compass Score | Health Star Rating | Nutri-Score | NOVA Category |
|----------|-------------|----------------------------------------------------------------------------------------------|--------------------|--------------------|-------------|---------------|
| 41107000 | 4000_LegNut | Soybeans, dry, cooked, fat not added in cooking                                              | 100                | 5                  | A           | 1             |
| 41305000 | 4000_LegNut | Lentils, dry, cooked, fat not added in cooking                                               | 100                | 5                  | A           | 1             |
| 41420020 | 4000_LegNut | Edamame, cooked                                                                              | 100                | 5                  | A           | 1             |
| 41422010 | 4000_LegNut | Soybean meal                                                                                 | 100                | 5                  | A           | 1             |
| 41440000 | 4000_LegNut | Textured vegetable protein, dry                                                              | 100                | 5                  | A           | 1             |
| 42100100 | 4000_LegNut | Almonds, NFS                                                                                 | 100                | 5                  | A           | 1             |
| 42101000 | 4000_LegNut | Almonds, unroasted                                                                           | 100                | 5                  | A           | 1             |
| 42110050 | 4000_LegNut | Mixed nuts, unroasted                                                                        | 100                | 5                  | B           | 1             |
| 42110160 | 4000_LegNut | Mixed nuts, without peanuts, unsalted                                                        | 100                | 4.5                | B           | 3             |
| 42111040 | 4000_LegNut | Peanuts, unroasted                                                                           | 100                | 5                  | A           | 1             |
| 42116000 | 4000_LegNut | Walnuts, NFS                                                                                 | 100                | 4.5                | A           | 1             |
| 42116050 | 4000_LegNut | Walnuts                                                                                      | 100                | 4.5                | A           | 1             |
| 42202200 | 4000_LegNut | Peanut butter, vitamin and mineral fortified                                                 | 100                | 4                  | C           | 3             |
| 43101050 | 4000_LegNut | Pumpkin seeds, NFS                                                                           | 100                | 5                  | B           | 1             |
| 43101150 | 4000_LegNut | Pumpkin seeds, unsalted                                                                      | 100                | 5                  | B           | 1             |
| 43102000 | 4000_LegNut | Sunflower seeds, plain, unsalted                                                             | 100                | 5                  | A           | 1             |
| 43102100 | 4000_LegNut | Sunflower seeds, plain, salted                                                               | 100                | 4.5                | B           | 1             |
| 43102300 | 4000_LegNut | Sunflower seeds, flavored                                                                    | 100                | 4.5                | C           | 1             |
| 43102400 | 4000_LegNut | Sunflower seeds, NFS                                                                         | 100                | 5                  | A           | 1             |
| 43103000 | 4000_LegNut | Sesame seeds                                                                                 | 100                | 5                  | A           | 1             |
| 43104000 | 4000_LegNut | Flax seeds                                                                                   | 100                | 5                  | A           | 1             |
| 43107000 | 4000_LegNut | Mixed seeds                                                                                  | 100                | 5                  | A           | 1             |
| 43108010 | 4000_LegNut | Chia seeds                                                                                   | 100                | 5                  | A           | 1             |
| 42101130 | 4000_LegNut | Almonds, unsalted                                                                            | 99                 | 5                  | A           | 3             |
| 41106020 | 4000_LegNut | Red kidney beans, dry, cooked, fat not added in cooking                                      | 99                 | 5                  | A           | 1             |
| 42113000 | 4000_LegNut | Pine nuts                                                                                    | 99                 | 4                  | A           | 1             |
| 42107000 | 4000_LegNut | Hazelnuts                                                                                    | 99                 | 5                  | A           | 1             |
| 42114130 | 4000_LegNut | Pistachio nuts, NFS                                                                          | 99                 | 5                  | A           | 1             |
| 41304991 | 4000_LegNut | Lentils, dry, cooked, made with oil                                                          | 98                 | 5                  | A           | 2             |
| 41301020 | 4000_LegNut | Cowpeas, dry, cooked, fat not added in cooking                                               | 98                 | 5                  | A           | 1             |
| 41304980 | 4000_LegNut | Lentils, dry, cooked, NS as to fat added in cooking                                          | 98                 | 5                  | A           | 2             |
| 41304990 | 4000_LegNut | Lentils, dry, cooked, fat added in cooking, NS as to type of fat                             | 98                 | 5                  | A           | 2             |
| 41102020 | 4000_LegNut | Black, brown, or Bayo beans, dry, cooked, fat not added in cooking                           | 97                 | 5                  | A           | 1             |
| 41103020 | 4000_LegNut | Lima beans, dry, cooked, fat not added in cooking                                            | 97                 | 5                  | A           | 1             |
| 41420010 | 4000_LegNut | Soybean curd                                                                                 | 97                 | 4                  | A           | 3             |
| 41107010 | 4000_LegNut | Soybeans, dry, cooked, fat added in cooking                                                  | 97                 | 5                  | A           | 2             |
| 41107020 | 4000_LegNut | Soybeans, dry, cooked, NS as to fat added in cooking                                         | 97                 | 5                  | A           | 2             |
| 43103300 | 4000_LegNut | Tahini                                                                                       | 97                 | 5                  | B           | 1             |
| 42110120 | 4000_LegNut | Mixed nuts, with peanuts, unsalted                                                           | 97                 | 5                  | B           | 3             |
| 42114145 | 4000_LegNut | Pistachio nuts, unsalted                                                                     | 96                 | 5                  | A           | 2             |
| 41102120 | 4000_LegNut | Black, brown, or Bayo beans, canned, drained, low sodium, fat not added in cooking           | 96                 | 5                  | A           | 3             |
| 41202505 | 4000_LegNut | Beans and tomatoes, fat not added in cooking                                                 | 96                 | 5                  | A           | 1             |
| 42112000 | 4000_LegNut | Pecans, NFS                                                                                  | 95                 | 4.5                | A           | 1             |
| 42200510 | 4000_LegNut | Almond butter, lower sodium                                                                  | 95                 | 5                  | B           | 3             |
| 41101020 | 4000_LegNut | Beans, dry, cooked, NS as to type, fat not added in cooking                                  | 94                 | 5                  | A           | 1             |
| 41104020 | 4000_LegNut | Pinto, calico, or red Mexican beans, dry, cooked, fat not added in cooking                   | 94                 | 5                  | A           | 1             |
| 41106000 | 4000_LegNut | Red kidney beans, dry, cooked, NS as to fat added in cooking                                 | 94                 | 5                  | A           | 2             |
| 41106010 | 4000_LegNut | Red kidney beans, dry, cooked, fat added in cooking, NS as to type of fat                    | 94                 | 5                  | A           | 2             |
| 42112100 | 4000_LegNut | Pecans, unroasted                                                                            | 94                 | 4.5                | A           | 1             |
| 41221020 | 4000_LegNut | Chili with beans, without meat                                                               | 94                 | 4.5                | A           | 2             |
| 42102000 | 4000_LegNut | Brazil nuts                                                                                  | 94                 | 4                  | C           | 1             |
| 42500100 | 4000_LegNut | Trail mix with nuts                                                                          | 94                 | 4.5                | B           | 2             |
| 41301000 | 4000_LegNut | Cowpeas, dry, cooked, NS as to fat added in cooking                                          | 94                 | 5                  | A           | 2             |
| 41301010 | 4000_LegNut | Cowpeas, dry, cooked, fat added in cooking                                                   | 94                 | 5                  | A           | 2             |
| 41106011 | 4000_LegNut | Red kidney beans, dry, cooked, made with oil                                                 | 94                 | 5                  | A           | 2             |
| 41102000 | 4000_LegNut | Black, brown, or Bayo beans, dry, cooked, NS as to fat added in cooking                      | 94                 | 5                  | A           | 2             |
| 41102010 | 4000_LegNut | Black, brown, or Bayo beans, dry, cooked, fat added in cooking, NS as to type of fat         | 94                 | 5                  | A           | 2             |
| 42101120 | 4000_LegNut | Almonds, lightly salted                                                                      | 93                 | 5                  | A           | 3             |
| 41104011 | 4000_LegNut | Pinto, calico, or red Mexican beans, dry, cooked, made with oil                              | 93                 | 5                  | A           | 3             |
| 41102100 | 4000_LegNut | Black, brown, or Bayo beans, canned, drained, low sodium, NS as to fat added in cooking      | 93                 | 5                  | A           | 3             |
| 41102110 | 4000_LegNut | Black, brown, or Bayo beans, canned, drained, low sodium, fat added in cooking               | 93                 | 5                  | A           | 3             |
| 41101000 | 4000_LegNut | Beans, dry, cooked, NS as to type and as to fat added in cooking                             | 93                 | 5                  | A           | 2             |
| 41101010 | 4000_LegNut | Beans, dry, cooked, NS as to type, fat added in cooking                                      | 93                 | 5                  | A           | 2             |
| 41104000 | 4000_LegNut | Pinto, calico, or red Mexican beans, dry, cooked, NS as to fat added in cooking              | 93                 | 5                  | A           | 2             |
| 41104010 | 4000_LegNut | Pinto, calico, or red Mexican beans, dry, cooked, fat added in cooking, NS as to type of fat | 93                 | 5                  | A           | 2             |
| 41102011 | 4000_LegNut | Black, brown, or Bayo beans, dry, cooked, made with oil                                      | 93                 | 5                  | A           | 2             |
| 41103011 | 4000_LegNut | Lima beans, dry, cooked, made with oil                                                       | 93                 | 5                  | A           | 2             |
| 41106520 | 4000_LegNut | Yellow, canary, or Peruvian beans, dry, cooked, fat not added in cooking                     | 93                 | 5                  | A           | 1             |
| 42200500 | 4000_LegNut | Almond butter                                                                                | 93                 | 5                  | B           | 3             |
| 42110150 | 4000_LegNut | Mixed nuts, without peanuts, salted                                                          | 92                 | 4                  | B           | 3             |
| 41202500 | 4000_LegNut | Beans and tomatoes, NS as to fat added in cooking                                            | 92                 | 5                  | A           | 2             |
| 41202510 | 4000_LegNut | Beans and tomatoes, fat added in cooking                                                     | 92                 | 5                  | A           | 2             |
| 41103000 | 4000_LegNut | Lima beans, dry, cooked, NS as to fat added in cooking                                       | 92                 | 5                  | A           | 2             |
| 41103010 | 4000_LegNut | Lima beans, dry, cooked, fat added in cooking, NS as to type of fat                          | 92                 | 5                  | A           | 2             |
| 41101120 | 4000_LegNut | White beans, dry, cooked, fat not added in cooking                                           | 92                 | 5                  | A           | 1             |
| 42111210 | 4000_LegNut | Peanuts, dry roasted, unsalted                                                               | 92                 | 5                  | B           | 1             |
| 42111110 | 4000_LegNut | Peanuts, roasted, unsalted                                                                   | 92                 | 5                  | B           | 3             |
| 42105000 | 4000_LegNut | Chestnuts                                                                                    | 92                 | 4.5                | A           | 1             |
| 43101100 | 4000_LegNut | Pumpkin seeds, salted                                                                        | 91                 | 4.5                | C           | 1             |
| 41106120 | 4000_LegNut | Red kidney beans, canned, drained, low sodium, fat not added in cooking                      | 91                 | 5                  | A           | 3             |
| 42112210 | 4000_LegNut | Pecans, unsalted                                                                             | 91                 | 4.5                | A           | 3             |
| 41101111 | 4000_LegNut | White beans, dry, cooked, made with oil                                                      | 91                 | 5                  | A           | 2             |
| 42110110 | 4000_LegNut | Mixed nuts, with peanuts, lightly salted                                                     | 91                 | 4.5                | B           | 3             |
| 41101100 | 4000_LegNut | White beans, dry, cooked, NS as to fat added in cooking                                      | 91                 | 5                  | A           | 2             |
| 41101110 | 4000_LegNut | White beans, dry, cooked, fat added in cooking, NS as to type of fat                         | 91                 | 5                  | A           | 2             |
| 42101110 | 4000_LegNut | Almonds, salted                                                                              | 91                 | 5                  | B           | 3             |
| 41103060 | 4000_LegNut | Pink beans, dry, cooked, fat not added in cooking                                            | 91                 | 5                  | A           | 1             |
| 41106500 | 4000_LegNut | Yellow, canary, or Peruvian beans, dry, cooked, NS as to fat added in cooking                | 91                 | 5                  | A           | 2             |
| 41106510 | 4000_LegNut | Yellow, canary, or Peruvian beans, dry, cooked, fat added in cooking, NS as to type of fat   | 91                 | 5                  | A           | 2             |
| 41106511 | 4000_LegNut | Yellow, canary, or Peruvian beans, dry, cooked, made with oil                                | 91                 | 5                  | A           | 2             |
| 42114142 | 4000_LegNut | Pistachio nuts, lightly salted                                                               | 91                 | 5                  | B           | 3             |
| 41103050 | 4000_LegNut | Pink beans, dry, cooked, NS as to fat added in cooking                                       | 91                 | 5                  | A           | 2             |
| 41103070 | 4000_LegNut | Pink beans, dry, cooked, fat added in cooking                                                | 91                 | 5                  | A           | 2             |
| 41302020 | 4000_LegNut | Chickpeas, dry, cooked, fat not added in cooking                                             | 90                 | 5                  | A           | 1             |
| 41108000 | 4000_LegNut | Mung beans, dry, cooked, fat not added in cooking                                            | 90                 | 5                  | A           | 1             |
| 42100050 | 4000_LegNut | Nuts, NFS                                                                                    | 90                 | 4.5                | C           | 2             |
| 42110000 | 4000_LegNut | Mixed nuts, NFS                                                                              | 90                 | 4.5                | C           | 2             |
| 42110100 | 4000_LegNut | Mixed nuts, with peanuts, salted                                                             | 90                 | 4.5                | C           | 2             |
| 42104050 | 4000_LegNut | Cashews, unroasted                                                                           | 90                 | 4                  | C           | 1             |
| 42104000 | 4000_LegNut | Cashews, NFS                                                                                 | 90                 | 4                  | C           | 1             |
| 41106100 | 4000_LegNut | Red kidney beans, canned, drained, low sodium, NS as to fat added in cooking                 | 90                 | 5                  | A           | 3             |
| 41106110 | 4000_LegNut | Red kidney beans, canned, drained, low sodium, fat added in cooking                          | 90                 | 5                  | A           | 3             |
| 41410010 | 4000_LegNut | Soy nuts                                                                                     | 90                 | 5                  | A           | 3             |
| 42114140 | 4000_LegNut | Pistachio nuts, salted                                                                       | 89                 | 5                  | B           | 2             |

| foodcode | level1nd    | Description                                                                                      | Food Compass Score | Health Star Rating | Nutri-Score | NOVA Category |
|----------|-------------|--------------------------------------------------------------------------------------------------|--------------------|--------------------|-------------|---------------|
| 41104100 | 4000_LegNut | Pinto, calico, or red Mexican beans, canned, drained, low sodium, NS as to fat added in cooking  | 89                 | 5                  | A           | 3             |
| 41104110 | 4000_LegNut | Pinto, calico, or red Mexican beans, canned, drained, low sodium, fat added in cooking           | 89                 | 5                  | A           | 3             |
| 41104120 | 4000_LegNut | Pinto, calico, or red Mexican beans, canned, drained, low sodium, fat not added in cooking       | 89                 | 5                  | A           | 3             |
| 41108010 | 4000_LegNut | Mung beans, dry, cooked, fat added in cooking                                                    | 89                 | 5                  | A           | 2             |
| 41108020 | 4000_LegNut | Mung beans, dry, cooked, NS as to fat added in cooking                                           | 89                 | 5                  | A           | 2             |
| 41102080 | 4000_LegNut | Black, brown, or Bayo beans, canned, drained, fat not added in cooking                           | 89                 | 5                  | A           | 3             |
| 41102090 | 4000_LegNut | Black, brown, or Bayo beans, canned, drained, NS as to fat added in cooking                      | 89                 | 5                  | A           | 3             |
| 41102040 | 4000_LegNut | Black, brown, or Bayo beans, canned, drained, fat added in cooking, NS as to type of fat         | 89                 | 5                  | A           | 3             |
| 41102050 | 4000_LegNut | Black, brown, or Bayo beans, canned, drained, made with oil                                      | 89                 | 5                  | A           | 3             |
| 41303000 | 4000_LegNut | Green or yellow split peas, dry, cooked, fat not added in cooking                                | 89                 | 5                  | A           | 1             |
| 41812000 | 4000_LegNut | Sandwich spread, meat substitute type                                                            | 89                 | 4                  | A           | 4             |
| 42104110 | 4000_LegNut | Cashews, unsalted                                                                                | 89                 | 4                  | C           | 2             |
| 41302120 | 4000_LegNut | Chickpeas, canned, drained, low sodium, fat not added in cooking                                 | 88                 | 5                  | A           | 3             |
| 41303011 | 4000_LegNut | Green or yellow split peas, dry, cooked, made with oil                                           | 88                 | 5                  | A           | 2             |
| 41303010 | 4000_LegNut | Green or yellow split peas, dry, cooked, fat added in cooking, NS as to type of fat              | 87                 | 5                  | A           | 2             |
| 41303020 | 4000_LegNut | Green or yellow split peas, dry, cooked, NS as to fat added in cooking                           | 87                 | 5                  | A           | 2             |
| 41102220 | 4000_LegNut | Fava beans, dry, cooked, fat not added in cooking                                                | 87                 | 5                  | A           | 1             |
| 41103090 | 4000_LegNut | Pink beans, canned, drained, fat added in cooking                                                | 87                 | 5                  | A           | 2             |
| 41302100 | 4000_LegNut | Chickpeas, canned, drained, low sodium, NS as to fat added in cooking                            | 87                 | 5                  | A           | 3             |
| 41302110 | 4000_LegNut | Chickpeas, canned, drained, low sodium, fat added in cooking                                     | 87                 | 5                  | A           | 3             |
| 41106540 | 4000_LegNut | Yellow, canary, or Peruvian beans, canned, drained, fat added in cooking, NS as to type of fat   | 87                 | 5                  | A           | 2             |
| 41302011 | 4000_LegNut | Chickpeas, dry, cooked, made with oil                                                            | 87                 | 5                  | A           | 2             |
| 41108030 | 4000_LegNut | Mung beans, canned, drained, NS as to fat added in cooking                                       | 87                 | 5                  | A           | 2             |
| 42202010 | 4000_LegNut | Peanut butter, lower sodium                                                                      | 86                 | 4                  | C           | 1             |
| 41302000 | 4000_LegNut | Chickpeas, dry, cooked, NS as to fat added in cooking                                            | 86                 | 5                  | A           | 2             |
| 41302010 | 4000_LegNut | Chickpeas, dry, cooked, fat added in cooking, NS as to type of fat                               | 86                 | 5                  | A           | 2             |
| 41101050 | 4000_LegNut | Beans, canned, drained, NS as to type and as to fat added in cooking                             | 86                 | 5                  | A           | 3             |
| 41101060 | 4000_LegNut | Beans, canned, drained, NS as to type, fat added in cooking                                      | 86                 | 5                  | A           | 3             |
| 41104030 | 4000_LegNut | Pinto, calico, or red Mexican beans, canned, drained, NS as to fat added in cooking              | 86                 | 5                  | A           | 3             |
| 41104040 | 4000_LegNut | Pinto, calico, or red Mexican beans, canned, drained, fat added in cooking, NS as to type of fat | 86                 | 5                  | A           | 3             |
| 41104050 | 4000_LegNut | Pinto, calico, or red Mexican beans, canned, drained, made with oil                              | 86                 | 5                  | A           | 3             |
| 41102200 | 4000_LegNut | Fava beans, dry, cooked, NS as to fat added in cooking                                           | 85                 | 5                  | A           | 2             |
| 41102210 | 4000_LegNut | Fava beans, dry, cooked, fat added in cooking                                                    | 85                 | 5                  | A           | 2             |
| 41103100 | 4000_LegNut | Pink beans, canned, drained, fat not added in cooking                                            | 85                 | 5                  | A           | 1             |
| 41106040 | 4000_LegNut | Red kidney beans, canned, drained, fat added in cooking, NS as to type of fat                    | 85                 | 5                  | A           | 3             |
| 41106050 | 4000_LegNut | Red kidney beans, canned, drained, made with oil                                                 | 85                 | 5                  | A           | 3             |
| 41304993 | 4000_LegNut | Lentils, dry, cooked, made with margarine                                                        | 85                 | 5                  | A           | 4             |
| 41812450 | 4000_LegNut | Vegetarian chili, made with meat substitute                                                      | 85                 | 5                  | A           | 4             |
| 42111100 | 4000_LegNut | Peanuts, roasted, salted                                                                         | 84                 | 4.5                | C           | 3             |
| 41102260 | 4000_LegNut | Fava beans, canned, drained, fat added in cooking                                                | 84                 | 5                  | A           | 2             |
| 41421010 | 4000_LegNut | Soybean curd, deep fried                                                                         | 84                 | 4.5                | A           | 3             |
| 41106080 | 4000_LegNut | Red kidney beans, canned, drained, fat not added in cooking                                      | 84                 | 5                  | A           | 3             |
| 41812600 | 4000_LegNut | Vegetarian, fillet                                                                               | 84                 | 4                  | B           | 4             |
| 41302080 | 4000_LegNut | Chickpeas, canned, drained, fat not added in cooking                                             | 84                 | 5                  | A           | 3             |
| 41101070 | 4000_LegNut | Beans, canned, drained, NS as to type, fat not added in cooking                                  | 84                 | 5                  | A           | 3             |
| 41104080 | 4000_LegNut | Pinto, calico, or red Mexican beans, canned, drained, fat not added in cooking                   | 84                 | 5                  | A           | 3             |
| 41302030 | 4000_LegNut | Chickpeas, canned, drained, NS as to fat added in cooking                                        | 83                 | 5                  | A           | 3             |
| 41302040 | 4000_LegNut | Chickpeas, canned, drained, fat added in cooking, NS as to type of fat                           | 83                 | 5                  | A           | 3             |
| 41302050 | 4000_LegNut | Chickpeas, canned, drained, made with oil                                                        | 83                 | 5                  | A           | 3             |
| 42111205 | 4000_LegNut | Peanuts, dry roasted, lightly salted                                                             | 83                 | 5                  | B           | 3             |
| 42202100 | 4000_LegNut | Peanut butter, lower sodium and lower sugar                                                      | 83                 | 4                  | C           | 2             |
| 41101200 | 4000_LegNut | White beans, canned, drained, low sodium, NS as to fat added in cooking                          | 83                 | 5                  | A           | 3             |
| 41101210 | 4000_LegNut | White beans, canned, drained, low sodium, fat added in cooking                                   | 83                 | 5                  | A           | 3             |
| 41311000 | 4000_LegNut | Papad, grilled or broiled                                                                        | 82                 | 4.5                | B           | 3             |
| 41101140 | 4000_LegNut | White beans, canned, drained, fat added in cooking, NS as to type of fat                         | 82                 | 5                  | A           | 3             |
| 41101150 | 4000_LegNut | White beans, canned, drained, made with oil                                                      | 82                 | 5                  | A           | 3             |
| 59003000 | 4000_LegNut | Meat substitute, cereal- and vegetable protein-based, fried                                      | 81                 | 4.5                | A           | 2             |
| 42202130 | 4000_LegNut | Peanut butter, lower sugar                                                                       | 81                 | 4                  | E           | 3             |
| 42104105 | 4000_LegNut | Cashews, lightly salted                                                                          | 81                 | 3.5                | C           | 3             |
| 41210200 | 4000_LegNut | Black beans, Cuban style                                                                         | 80                 | 4.5                | A           | 2             |
| 41103013 | 4000_LegNut | Lima beans, dry, cooked, made with margarine                                                     | 80                 | 5                  | A           | 4             |
| 41101220 | 4000_LegNut | White beans, canned, drained, low sodium, fat not added in cooking                               | 80                 | 5                  | A           | 3             |
| 42500000 | 4000_LegNut | Trail mix, NFS                                                                                   | 79                 | 4                  | D           | 2             |
| 42501000 | 4000_LegNut | Trail mix with nuts and fruit                                                                    | 79                 | 4                  | D           | 2             |
| 42101300 | 4000_LegNut | Almonds, flavored                                                                                | 79                 | 5                  | B           | 4             |
| 42104100 | 4000_LegNut | Cashews, salted                                                                                  | 79                 | 3.5                | C           | 2             |
| 41106013 | 4000_LegNut | Red kidney beans, dry, cooked, made with margarine                                               | 79                 | 5                  | A           | 4             |
| 42111000 | 4000_LegNut | Peanuts, NFS                                                                                     | 79                 | 4.5                | C           | 3             |
| 42111200 | 4000_LegNut | Peanuts, dry roasted, salted                                                                     | 79                 | 4.5                | C           | 3             |
| 42200600 | 4000_LegNut | Almond paste                                                                                     | 79                 | 4                  | D           | 3             |
| 41205040 | 4000_LegNut | Refried beans, canned, low sodium                                                                | 79                 | 5                  | A           | 3             |
| 41102013 | 4000_LegNut | Black, brown, or Bayo beans, dry, cooked, made with margarine                                    | 78                 | 5                  | A           | 4             |
| 41205011 | 4000_LegNut | Refried beans, made with oil                                                                     | 78                 | 5                  | A           | 2             |
| 41205016 | 4000_LegNut | Refried beans, NS as to fat added in cooking                                                     | 78                 | 5                  | A           | 2             |
| 41205015 | 4000_LegNut | Refried beans, fat not added in cooking                                                          | 78                 | 5                  | A           | 3             |
| 41101180 | 4000_LegNut | White beans, canned, drained, fat not added in cooking                                           | 77                 | 5                  | A           | 3             |
| 41205010 | 4000_LegNut | Refried beans, fat added in cooking, NS as to type of fat                                        | 77                 | 5                  | A           | 2             |
| 41101113 | 4000_LegNut | White beans, dry, cooked, made with margarine                                                    | 77                 | 5                  | A           | 4             |
| 41104013 | 4000_LegNut | Pinto, calico, or red Mexican beans, dry, cooked, made with margarine                            | 77                 | 5                  | A           | 4             |
| 41304992 | 4000_LegNut | Lentils, dry, cooked, made with animal fat or meat drippings                                     | 77                 | 5                  | A           | 2             |
| 41210150 | 4000_LegNut | Stewed pink beans with white potatoes and ham, Puerto Rican style                                | 77                 | 4.5                | A           | 2             |
| 41812900 | 4000_LegNut | Vegetarian meat loaf                                                                             | 77                 | 4                  | A           | 4             |
| 42202150 | 4000_LegNut | Peanut butter, reduced fat                                                                       | 77                 | 4                  | C           | 3             |
| 41205013 | 4000_LegNut | Refried beans, made with margarine                                                               | 76                 | 5                  | A           | 3             |
| 41102070 | 4000_LegNut | Black, brown, or Bayo beans, canned, drained, made with margarine                                | 76                 | 5                  | A           | 4             |
| 41303013 | 4000_LegNut | Green or yellow split peas, dry, cooked, made with margarine                                     | 76                 | 5                  | A           | 4             |
| 42111030 | 4000_LegNut | Peanuts, boiled                                                                                  | 76                 | 4.5                | A           | 3             |
| 42101350 | 4000_LegNut | Almonds, honey roasted                                                                           | 76                 | 4                  | D           | 3             |
| 41203030 | 4000_LegNut | Black bean salad                                                                                 | 76                 | 5                  | A           | 3             |
| 42110300 | 4000_LegNut | Mixed nuts, honey roasted                                                                        | 75                 | 3.5                | D           | 3             |
| 42112200 | 4000_LegNut | Pecans, salted                                                                                   | 75                 | 4                  | C           | 3             |
| 41210100 | 4000_LegNut | Stewed red beans, Puerto Rican style                                                             | 75                 | 4.5                | A           | 2             |
| 41304130 | 4000_LegNut | Cowpeas, dry, cooked with pork                                                                   | 75                 | 5                  | A           | 3             |
| 42201000 | 4000_LegNut | Cashew butter                                                                                    | 74                 | 3                  | C           | 3             |
| 41106513 | 4000_LegNut | Yellow, canary, or Peruvian beans, dry, cooked, made with margarine                              | 74                 | 5                  | A           | 4             |
| 41207030 | 4000_LegNut | Beans, dry, cooked with ground beef                                                              | 74                 | 5                  | A           | 2             |
| 42502100 | 4000_LegNut | Trail mix with pretzels, cereal, or granola                                                      | 74                 | 4                  | D           | 2             |
| 42202000 | 4000_LegNut | Peanut butter                                                                                    | 73                 | 3.5                | C           | 3             |
| 41104070 | 4000_LegNut | Pinto, calico, or red Mexican beans, canned, drained, made with margarine                        | 73                 | 5                  | A           | 4             |
| 41205017 | 4000_LegNut | Refried beans, from restaurant                                                                   | 72                 | 5                  | A           | 1             |
| 41209000 | 4000_LegNut | Falafel                                                                                          | 72                 | 4                  | D           | 2             |
| 41304030 | 4000_LegNut | Peas, dry, cooked with pork                                                                      | 72                 | 5                  | A           | 3             |
| 42501500 | 4000_LegNut | Trail mix with chocolate                                                                         | 71                 | 3.5                | D           | 2             |
| 42111500 | 4000_LegNut | Peanuts, honey roasted                                                                           | 71                 | 4                  | C           | 3             |

| foodcode | level1nd    | Description                                                                                  | Food Compass Score | Health Star Rating | Nutri-Score | NOVA Category |
|----------|-------------|----------------------------------------------------------------------------------------------|--------------------|--------------------|-------------|---------------|
| 41103012 | 4000_LegNut | Lima beans, dry, cooked, made with animal fat or meat drippings                              | 71                 | 5                  | A           | 2             |
| 41302013 | 4000_LegNut | Chickpeas, dry, cooked, made with margarine                                                  | 70                 | 5                  | A           | 4             |
| 41208100 | 4000_LegNut | Beans, dry, cooked with pork                                                                 | 70                 | 5                  | A           | 3             |
| 41106012 | 4000_LegNut | Red kidney beans, dry, cooked, made with animal fat or meat drippings                        | 70                 | 5                  | A           | 2             |
| 42116100 | 4000_LegNut | Walnuts, honey roasted                                                                       | 70                 | 3                  | D           | 3             |
| 41102012 | 4000_LegNut | Black, brown, or Bayo beans, dry, cooked, made with animal fat or meat drippings             | 70                 | 5                  | A           | 2             |
| 41101112 | 4000_LegNut | White beans, dry, cooked, made with animal fat or meat drippings                             | 69                 | 5                  | A           | 2             |
| 41104012 | 4000_LegNut | Pinto, calico, or red Mexican beans, dry, cooked, made with animal fat or meat drippings     | 69                 | 5                  | A           | 2             |
| 41310160 | 4000_LegNut | Stewed chickpeas, with potatoes, Puerto Rican style                                          | 69                 | 5                  | A           | 2             |
| 41810610 | 4000_LegNut | Chicken, meatless, breaded, fried                                                            | 68                 | 4.5                | A           | 4             |
| 42109100 | 4000_LegNut | Macadamia nuts                                                                               | 68                 | 3.5                | C           | 3             |
| 41420050 | 4000_LegNut | Soybean curd cheese                                                                          | 68                 | 4                  | A           | 4             |
| 41102060 | 4000_LegNut | Black, brown, or Bayo beans, canned, drained, made with animal fat or meat drippings         | 68                 | 5                  | A           | 2             |
| 41205030 | 4000_LegNut | Refried beans with meat                                                                      | 68                 | 5                  | A           | 2             |
| 41303012 | 4000_LegNut | Green or yellow split peas, dry, cooked, made with animal fat or meat drippings              | 68                 | 5                  | A           | 2             |
| 41310150 | 4000_LegNut | Stewed chickpeas, Puerto Rican style                                                         | 68                 | 4.5                | A           | 2             |
| 41106512 | 4000_LegNut | Yellow, canary, or Peruvian beans, dry, cooked, made with animal fat or meat drippings       | 68                 | 5                  | A           | 2             |
| 41812800 | 4000_LegNut | Vegetarian stew                                                                              | 66                 | 4.5                | B           | 2             |
| 42104500 | 4000_LegNut | Cashews, honey roasted                                                                       | 66                 | 2.5                | E           | 3             |
| 42112300 | 4000_LegNut | Pecans, honey roasted                                                                        | 66                 | 3                  | D           | 3             |
| 41306000 | 4000_LegNut | Loaf, lentil                                                                                 | 66                 | 4.5                | A           | 2             |
| 41811950 | 4000_LegNut | Swiss steak, with gravy, meatless                                                            | 65                 | 3.5                | B           | 3             |
| 41104060 | 4000_LegNut | Pinto, calico, or red Mexican beans, canned, drained, made with animal fat or meat drippings | 65                 | 5                  | A           | 2             |
| 41302012 | 4000_LegNut | Chickpeas, dry, cooked, made with animal fat or meat drippings                               | 64                 | 5                  | A           | 2             |
| 41310220 | 4000_LegNut | Fried chickpeas with bacon, Puerto Rican style                                               | 64                 | 4.5                | A           | 2             |
| 41811600 | 4000_LegNut | Luncheon slice, meatless-beef, chicken, salami or turkey                                     | 63                 | 3.5                | C           | 4             |
| 41201020 | 4000_LegNut | Baked beans, vegetarian                                                                      | 63                 | 4.5                | A           | 3             |
| 41205012 | 4000_LegNut | Refried beans, made with animal fat or meat drippings                                        | 63                 | 5                  | A           | 2             |
| 41811800 | 4000_LegNut | Meatball, meatless                                                                           | 62                 | 4                  | A           | 4             |
| 41205020 | 4000_LegNut | Refried beans with cheese                                                                    | 61                 | 4.5                | A           | 3             |
| 41811400 | 4000_LegNut | Frankfurter or hot dog, meatless                                                             | 61                 | 4                  | A           | 4             |
| 41810400 | 4000_LegNut | Breakfast link, pattie, or slice, meatless                                                   | 60                 | 2                  | D           | 4             |
| 41811890 | 4000_LegNut | Vegetarian burger or patty, meatless, no bun                                                 | 60                 | 4                  | A           | 4             |
| 41310210 | 4000_LegNut | Stewed chickpeas with Spanish sausages, Puerto Rican style                                   | 60                 | 4                  | B           | 2             |
| 42203000 | 4000_LegNut | Peanut butter and jelly                                                                      | 58                 | 3.5                | D           | 3             |
| 41810200 | 4000_LegNut | Bacon strip, meatless                                                                        | 57                 | 1                  | D           | 4             |
| 41810600 | 4000_LegNut | Chicken, meatless, NFS                                                                       | 54                 | 4                  | B           | 4             |
| 41310200 | 4000_LegNut | Chickpeas stewed with pig's feet, Puerto Rican style                                         | 53                 | 4.5                | A           | 2             |
| 42203100 | 4000_LegNut | Peanut butter and chocolate spread                                                           | 53                 | 3                  | E           | 3             |
| 41812850 | 4000_LegNut | Vegetarian stroganoff                                                                        | 53                 | 3                  | C           | 2             |
| 41210090 | 4000_LegNut | Stewed beans with pork, tomatoes, and chili peppers, Mexican style                           | 50                 | 4.5                | B           | 1             |
| 41210160 | 4000_LegNut | Stewed pink beans with pig's feet, Puerto Rican style                                        | 48                 | 4.5                | A           | 2             |
| 41210170 | 4000_LegNut | Stewed red beans with pig's feet, Puerto Rican style                                         | 48                 | 4.5                | A           | 2             |
| 42106000 | 4000_LegNut | Coconut, fresh                                                                               | 47                 | 2                  | C           | 1             |
| 41210190 | 4000_LegNut | Stewed red beans with pig's feet and potatoes, Puerto Rican style                            | 46                 | 4.5                | A           | 2             |
| 41201010 | 4000_LegNut | Baked beans, NFS                                                                             | 42                 | 4.5                | A           | 4             |
| 41204020 | 4000_LegNut | Boston baked beans                                                                           | 42                 | 4.5                | A           | 4             |
| 41208030 | 4000_LegNut | Pork and beans                                                                               | 42                 | 4.5                | A           | 4             |
| 41202020 | 4000_LegNut | Chili beans, barbecue beans, ranch style beans or Mexican-style beans                        | 41                 | 4.5                | A           | 4             |
| 41304000 | 4000_LegNut | Wasabi peas                                                                                  | 35                 | 4                  | D           | 4             |
| 41812400 | 4000_LegNut | Vegetarian pot pie                                                                           | 34                 | 3.5                | B           | 3             |
| 41421020 | 4000_LegNut | Soybean curd, breaded, fried                                                                 | 31                 | 3.5                | A           | 4             |
| 41901020 | 4000_LegNut | Soyburger, meatless, with cheese on bun                                                      | 30                 | 3.5                | C           | 4             |
| 41210000 | 4000_LegNut | Bean cake                                                                                    | 25                 | 2.5                | C           | 3             |
| 41206030 | 4000_LegNut | Beans and franks                                                                             | 23                 | 4.5                | A           | 4             |
| 42106020 | 4000_LegNut | Coconut, packaged                                                                            | 20                 | 0.5                | E           | 3             |



| foodcode | level1nd | Description                                                                                                             | Food Compass Score | Health Star Rating | Nutri-Score | NOVA Category |
|----------|----------|-------------------------------------------------------------------------------------------------------------------------|--------------------|--------------------|-------------|---------------|
| 33401200 | 5000_MPE | Egg substitute, omelet, scrambled, or fried, with vegetables, fat added in cooking                                      | 75                 | 3.5                | B           | 2             |
| 33401220 | 5000_MPE | Egg substitute, omelet, scrambled, or fried, with vegetables, NS as to fat added in cooking                             | 75                 | 3.5                | B           | 2             |
| 25110420 | 5000_MPE | Chicken liver, braised                                                                                                  | 72                 | 4                  | C           | 1             |
| 32400300 | 5000_MPE | Egg white, omelet, scrambled, or fried, with vegetables, fat added in cooking                                           | 70                 | 3.5                | B           | 2             |
| 32400320 | 5000_MPE | Egg white, omelet, scrambled, or fried, with vegetables, NS as to fat added in cooking                                  | 70                 | 3.5                | B           | 2             |
| 33401210 | 5000_MPE | Egg substitute, omelet, scrambled, or fried, with vegetables, fat not added in cooking                                  | 69                 | 3.5                | A           | 2             |
| 33001010 | 5000_MPE | Egg substitute, omelet, scrambled, or fried, made with oil                                                              | 69                 | 3.5                | B           | 3             |
| 33001100 | 5000_MPE | Egg substitute, cheese flavored, omelet, scrambled, or fried, fat added in cooking                                      | 69                 | 3.5                | B           | 3             |
| 33001120 | 5000_MPE | Egg substitute, cheese flavored, omelet, scrambled, or fried, NS as to fat added in cooking                             | 69                 | 3.5                | B           | 3             |
| 33001200 | 5000_MPE | Egg substitute, vegetable flavored, omelet, scrambled, or fried, fat added in cooking                                   | 69                 | 3.5                | B           | 3             |
| 33001220 | 5000_MPE | Egg substitute, vegetable flavored, omelet, scrambled, or fried, NS as to fat added in cooking                          | 69                 | 3.5                | B           | 3             |
| 24402100 | 5000_MPE | Dove, cooked, NS as to cooking method                                                                                   | 65                 | 4                  | B           | 1             |
| 33401400 | 5000_MPE | Egg substitute, omelet, scrambled, or fried, with cheese and vegetables, fat added in cooking                           | 64                 | 3.5                | B           | 3             |
| 33401420 | 5000_MPE | Egg substitute, omelet, scrambled, or fried, with cheese and vegetables, NS as to fat added in cooking                  | 64                 | 3.5                | B           | 3             |
| 25120000 | 5000_MPE | Heart, cooked                                                                                                           | 64                 | 4                  | B           | 1             |
| 32130470 | 5000_MPE | Egg omelet or scrambled egg, with tomatoes and dark-green vegetables, fat not added in cooking                          | 63                 | 3.5                | B           | 1             |
| 32130410 | 5000_MPE | Egg omelet or scrambled egg, with tomatoes, fat not added in cooking                                                    | 63                 | 3.5                | B           | 1             |
| 25110120 | 5000_MPE | Beef liver, braised                                                                                                     | 63                 | 4                  | C           | 1             |
| 24403100 | 5000_MPE | Quail, cooked                                                                                                           | 62                 | 4                  | B           | 1             |
| 32130430 | 5000_MPE | Egg omelet or scrambled egg, with dark-green vegetables, fat added in cooking                                           | 61                 | 3.5                | B           | 2             |
| 32130450 | 5000_MPE | Egg omelet or scrambled egg, with dark-green vegetables, NS as to fat added in cooking                                  | 61                 | 3.5                | B           | 2             |
| 25130000 | 5000_MPE | Kidney, cooked                                                                                                          | 61                 | 4                  | B           | 1             |
| 32130460 | 5000_MPE | Egg omelet or scrambled egg, with tomatoes and dark-green vegetables, fat added in cooking                              | 61                 | 3.5                | B           | 2             |
| 32130480 | 5000_MPE | Egg omelet or scrambled egg, with tomatoes and dark-green vegetables, NS as to fat added in cooking                     | 61                 | 3.5                | B           | 2             |
| 32130500 | 5000_MPE | Egg omelet or scrambled egg, with vegetables other than dark green and/or tomatoes, fat not added in cooking            | 61                 | 3.5                | B           | 1             |
| 32130400 | 5000_MPE | Egg omelet or scrambled egg, with tomatoes, fat added in cooking                                                        | 60                 | 3.5                | B           | 2             |
| 32130420 | 5000_MPE | Egg omelet or scrambled egg, with tomatoes, NS as to fat added in cooking                                               | 60                 | 3.5                | B           | 2             |
| 24198720 | 5000_MPE | Chicken, ground                                                                                                         | 60                 | 4                  | C           | 1             |
| 24207000 | 5000_MPE | Turkey, ground                                                                                                          | 60                 | 4                  | C           | 1             |
| 32130490 | 5000_MPE | Egg omelet or scrambled egg, with vegetables other than dark green and/or tomatoes, fat added in cooking                | 59                 | 3.5                | B           | 2             |
| 32130510 | 5000_MPE | Egg omelet or scrambled egg, with vegetables other than dark green and/or tomatoes, NS as to fat added in cooking       | 59                 | 3.5                | B           | 2             |
| 31101010 | 5000_MPE | Egg, whole, raw                                                                                                         | 59                 | 4                  | B           | 1             |
| 32130610 | 5000_MPE | Egg omelet or scrambled egg, with cheese and tomatoes, fat not added in cooking                                         | 59                 | 3.5                | B           | 2             |
| 24123301 | 5000_MPE | Chicken breast, grilled without sauce, skin not eaten                                                                   | 59                 | 4                  | B           | 2             |
| 24124201 | 5000_MPE | Chicken breast, sauteed, skin not eaten                                                                                 | 59                 | 4                  | B           | 2             |
| 24127501 | 5000_MPE | Chicken breast, baked, coated, skin / coating not eaten                                                                 | 59                 | 4                  | B           | 2             |
| 25110450 | 5000_MPE | Chicken liver, fried                                                                                                    | 59                 | 3.5                | C           | 3             |
| 32400065 | 5000_MPE | Egg white omelet, scrambled, or fried, made with oil                                                                    | 59                 | 3.5                | B           | 2             |
| 24198683 | 5000_MPE | Chicken fillet, grilled                                                                                                 | 58                 | 4                  | B           | 2             |
| 32131200 | 5000_MPE | Egg omelet or scrambled egg, with potatoes and/or onions, fat added in cooking                                          | 58                 | 3.5                | B           | 2             |
| 32131220 | 5000_MPE | Egg omelet or scrambled egg, with potatoes and/or onions, NS as to fat added in cooking                                 | 58                 | 3.5                | B           | 2             |
| 24122161 | 5000_MPE | Chicken breast, baked, broiled, or roasted with marinade, skin not eaten, from raw                                      | 58                 | 4                  | B           | 2             |
| 31110010 | 5000_MPE | Egg, yolk only, raw                                                                                                     | 58                 | 2                  | D           | 1             |
| 25110140 | 5000_MPE | Beef liver, fried                                                                                                       | 57                 | 4                  | C           | 1             |
| 32400310 | 5000_MPE | Egg white, omelet, scrambled, or fried, with vegetables, fat not added in cooking                                       | 57                 | 4                  | A           | 1             |
| 32130440 | 5000_MPE | Egg omelet or scrambled egg, with dark-green vegetables, fat not added in cooking                                       | 57                 | 3.5                | B           | 1             |
| 23332100 | 5000_MPE | Opossum, cooked                                                                                                         | 57                 | 4.5                | B           | 1             |
| 32130700 | 5000_MPE | Egg omelet or scrambled egg, with cheese and vegetables other than dark green and/or tomatoes, fat not added in cooking | 57                 | 3.5                | B           | 2             |
| 24103050 | 5000_MPE | Chicken, NS as to part, grilled without sauce, NS as to skin eaten                                                      | 57                 | 4                  | B           | 2             |
| 24103060 | 5000_MPE | Chicken, NS as to part, grilled without sauce, skin not eaten                                                           | 57                 | 4                  | B           | 2             |
| 24104051 | 5000_MPE | Chicken, NS as to part, sauteed, skin not eaten                                                                         | 57                 | 4                  | B           | 2             |
| 24202500 | 5000_MPE | Turkey, thigh, cooked, skin not eaten                                                                                   | 57                 | 4                  | C           | 1             |
| 23350100 | 5000_MPE | Ostrich, cooked                                                                                                         | 57                 | 4                  | B           | 1             |
| 24202010 | 5000_MPE | Turkey, drumstick, cooked, skin not eaten                                                                               | 56                 | 4                  | B           | 1             |
| 24202060 | 5000_MPE | Turkey, drumstick, roasted, skin not eaten                                                                              | 56                 | 4                  | B           | 1             |
| 32110150 | 5000_MPE | Shrimp-egg patty                                                                                                        | 56                 | 1                  | E           | 3             |
| 24201220 | 5000_MPE | Turkey, dark meat, roasted, skin not eaten                                                                              | 56                 | 4                  | C           | 1             |
| 24201320 | 5000_MPE | Turkey, light and dark meat, roasted, skin not eaten                                                                    | 56                 | 4                  | B           | 1             |
| 24201330 | 5000_MPE | Turkey, light and dark meat, roasted, skin eaten                                                                        | 56                 | 4                  | C           | 1             |
| 23333100 | 5000_MPE | Squirrel, cooked                                                                                                        | 56                 | 4.5                | B           | 1             |
| 24202460 | 5000_MPE | Turkey, thigh, cooked, skin eaten                                                                                       | 55                 | 4                  | C           | 1             |
| 24201030 | 5000_MPE | Turkey, light meat, skin eaten                                                                                          | 55                 | 4                  | C           | 1             |
| 24201130 | 5000_MPE | Turkey, light meat, roasted, skin eaten                                                                                 | 55                 | 4                  | C           | 1             |
| 24203010 | 5000_MPE | Turkey, wing, cooked, skin not eaten                                                                                    | 55                 | 4                  | B           | 1             |
| 24201000 | 5000_MPE | Turkey, NFS                                                                                                             | 54                 | 4                  | B           | 1             |
| 24201020 | 5000_MPE | Turkey, light meat, skin not eaten                                                                                      | 54                 | 4                  | B           | 1             |
| 24201120 | 5000_MPE | Turkey, light meat, roasted, skin not eaten                                                                             | 54                 | 4                  | B           | 1             |
| 24402110 | 5000_MPE | Dove, fried                                                                                                             | 54                 | 4                  | B           | 2             |
| 32131210 | 5000_MPE | Egg omelet or scrambled egg, with potatoes and/or onions, fat not added in cooking                                      | 54                 | 3.5                | A           | 1             |
| 32130010 | 5000_MPE | Egg omelet or scrambled egg, made with oil                                                                              | 54                 | 3                  | C           | 2             |
| 32110100 | 5000_MPE | Eggs a la Malaguena, Puerto Rican style                                                                                 | 54                 | 4                  | B           | 2             |
| 24142501 | 5000_MPE | Chicken drumstick, grilled without sauce, skin not eaten                                                                | 54                 | 4                  | B           | 2             |
| 24144301 | 5000_MPE | Chicken drumstick, sauteed, skin not eaten                                                                              | 54                 | 4                  | B           | 2             |
| 24147401 | 5000_MPE | Chicken drumstick, baked, coated, skin / coating not eaten                                                              | 54                 | 4                  | B           | 2             |
| 32103000 | 5000_MPE | Egg salad, made with mayonnaise                                                                                         | 54                 | 3                  | D           | 3             |
| 24198670 | 5000_MPE | Chicken, chicken roll, roasted                                                                                          | 54                 | 4                  | B           | 1             |
| 24201230 | 5000_MPE | Turkey, dark meat, roasted, skin eaten                                                                                  | 53                 | 4                  | C           | 1             |
| 32105310 | 5000_MPE | Ripe plantain omelet, Puerto Rican style                                                                                | 53                 | 3.5                | C           | 2             |
| 24127202 | 5000_MPE | Chicken breast, fried, coated, prepared skinless, coating eaten, from raw                                               | 53                 | 4                  | B           | 2             |
| 25140110 | 5000_MPE | Sweetbreads, cooked                                                                                                     | 53                 | 4                  | B           | 1             |
| 24123300 | 5000_MPE | Chicken breast, grilled without sauce, skin eaten                                                                       | 53                 | 4                  | B           | 2             |
| 24124200 | 5000_MPE | Chicken breast, sauteed, skin eaten                                                                                     | 53                 | 4                  | B           | 2             |
| 24102000 | 5000_MPE | Chicken, NS as to part, baked, broiled, or roasted, NS as to skin eaten                                                 | 53                 | 4                  | B           | 1             |
| 24102020 | 5000_MPE | Chicken, NS as to part, baked, broiled, or roasted, skin not eaten                                                      | 53                 | 4                  | B           | 1             |
| 24142301 | 5000_MPE | Chicken drumstick, baked, broiled, or roasted, skin not eaten, from raw                                                 | 53                 | 4                  | B           | 1             |
| 32400500 | 5000_MPE | Egg white, omelet, scrambled, or fried, with cheese and vegetables, fat added in cooking                                | 53                 | 3.5                | B           | 3             |
| 32400520 | 5000_MPE | Egg white, omelet, scrambled, or fried, with cheese and vegetables, NS as to fat added in cooking                       | 53                 | 3.5                | B           | 3             |
| 24205100 | 5000_MPE | Turkey, back                                                                                                            | 53                 | 3.5                | D           | 1             |
| 33401410 | 5000_MPE | Egg substitute, omelet, scrambled, or fried, with cheese and vegetables, fat not added in cooking                       | 53                 | 3.5                | B           | 3             |
| 24127201 | 5000_MPE | Chicken breast, fried, coated, skin / coating not eaten, from raw                                                       | 53                 | 4                  | B           | 2             |
| 32103030 | 5000_MPE | Egg salad, made with creamy dressing                                                                                    | 52                 | 3                  | C           | 3             |
| 31102000 | 5000_MPE | Egg, whole, cooked, NS as to cooking method                                                                             | 52                 | 3.5                | C           | 2             |
| 24134101 | 5000_MPE | Chicken leg, drumstick and thigh, grilled without sauce, skin not eaten                                                 | 52                 | 4                  | C           | 2             |
| 24134301 | 5000_MPE | Chicken leg, drumstick and thigh, sauteed, skin not eaten                                                               | 52                 | 4                  | C           | 2             |
| 24137311 | 5000_MPE | Chicken leg, drumstick and thigh, baked, coated, skin / coating not eaten                                               | 52                 | 4                  | C           | 2             |
| 24123120 | 5000_MPE | Chicken breast, stewed, skin not eaten                                                                                  | 52                 | 4.5                | A           | 1             |
| 24122131 | 5000_MPE | Chicken breast, baked, broiled, or roasted, skin not eaten, from raw                                                    | 52                 | 4                  | B           | 1             |
| 41810250 | 5000_MPE | Bacon bits                                                                                                              | 52                 | 1.5                | D           | 4             |
| 24400020 | 5000_MPE | Cornish game hen, cooked, skin not eaten                                                                                | 52                 | 4                  | B           | 1             |
| 24401020 | 5000_MPE | Cornish game hen, roasted, skin not eaten                                                                               | 52                 | 4                  | B           | 1             |
| 33000990 | 5000_MPE | Egg substitute, omelet, scrambled, or fried, NS as to fat added in cooking                                              | 52                 | 3.5                | C           | 3             |
| 33001035 | 5000_MPE | Egg substitute, omelet, scrambled, or fried, NS as to type of fat                                                       | 52                 | 3.5                | C           | 3             |

| foodcode | level1nd | Description                                                                                                                  | Food Compass Score | Health Star Rating | Nutri-Score | NOVA Category |
|----------|----------|------------------------------------------------------------------------------------------------------------------------------|--------------------|--------------------|-------------|---------------|
| 24132231 | 5000_MPE | Chicken leg, drumstick and thigh, baked or broiled, skin not eaten                                                           | 52                 | 4                  | B           | 1             |
| 24103000 | 5000_MPE | Chicken, NS as to part, stewed, NS as to skin eaten                                                                          | 52                 | 4                  | B           | 1             |
| 24103020 | 5000_MPE | Chicken, NS as to part, stewed, skin not eaten                                                                               | 52                 | 4                  | B           | 1             |
| 24122160 | 5000_MPE | Chicken breast, baked, broiled, or roasted with marinade, skin eaten, from raw                                               | 52                 | 4                  | C           | 2             |
| 24203020 | 5000_MPE | Turkey, wing, cooked, skin eaten                                                                                             | 51                 | 4                  | C           | 1             |
| 24154011 | 5000_MPE | Chicken thigh, grilled without sauce, skin not eaten                                                                         | 51                 | 4                  | C           | 2             |
| 24154301 | 5000_MPE | Chicken thigh, sauteed, skin not eaten                                                                                       | 51                 | 4                  | C           | 2             |
| 24157401 | 5000_MPE | Chicken thigh, baked, coated, skin / coating not eaten                                                                       | 51                 | 4                  | C           | 2             |
| 24201410 | 5000_MPE | Turkey, light or dark meat, stewed, skin not eaten                                                                           | 51                 | 4                  | B           | 1             |
| 32130640 | 5000_MPE | Egg omelet or scrambled egg, with cheese and dark-green vegetables, fat not added in cooking                                 | 51                 | 3.5                | C           | 2             |
| 24152231 | 5000_MPE | Chicken thigh, baked, broiled, or roasted, skin not eaten, from raw                                                          | 51                 | 4                  | B           | 1             |
| 24122130 | 5000_MPE | Chicken breast, baked, broiled, or roasted, skin eaten, from raw                                                             | 51                 | 4                  | B           | 1             |
| 25150000 | 5000_MPE | Brains, cooked                                                                                                               | 51                 | 3.5                | B           | 1             |
| 24122171 | 5000_MPE | Chicken breast, rotisserie, skin not eaten                                                                                   | 51                 | 4.5                | A           | 1             |
| 24120120 | 5000_MPE | Chicken breast, NS as to cooking method, skin not eaten                                                                      | 51                 | 4.5                | A           | 1             |
| 24123110 | 5000_MPE | Chicken breast, stewed, skin eaten                                                                                           | 51                 | 4                  | B           | 1             |
| 32130670 | 5000_MPE | Egg omelet or scrambled egg, with cheese, tomatoes, and dark-green vegetables, fat not added in cooking                      | 51                 | 3.5                | B           | 2             |
| 24142401 | 5000_MPE | Chicken drumstick, rotisserie, skin not eaten                                                                                | 50                 | 4                  | B           | 1             |
| 24140220 | 5000_MPE | Chicken drumstick, NS as to cooking method, skin not eaten                                                                   | 50                 | 4                  | B           | 1             |
| 24143220 | 5000_MPE | Chicken drumstick, stewed, skin not eaten                                                                                    | 50                 | 4                  | B           | 1             |
| 24202070 | 5000_MPE | Turkey, drumstick, roasted, skin eaten                                                                                       | 50                 | 4                  | C           | 1             |
| 32102000 | 5000_MPE | Egg, deviled                                                                                                                 | 50                 | 3                  | C           | 3             |
| 24103055 | 5000_MPE | Chicken, NS as to part, grilled without sauce, skin eaten                                                                    | 50                 | 4                  | C           | 1             |
| 24104049 | 5000_MPE | Chicken, NS as to part, sauteed, skin eaten                                                                                  | 50                 | 4                  | C           | 1             |
| 24404100 | 5000_MPE | Pheasant, cooked                                                                                                             | 50                 | 4                  | B           | 1             |
| 31105090 | 5000_MPE | Egg, whole, fried, from fast food / restaurant                                                                               | 50                 | 3.5                | C           | 1             |
| 24300120 | 5000_MPE | Duck, cooked, skin not eaten                                                                                                 | 50                 | 4                  | B           | 1             |
| 24301020 | 5000_MPE | Duck, roasted, skin not eaten                                                                                                | 50                 | 4                  | B           | 1             |
| 24102050 | 5000_MPE | Chicken, NS as to part, rotisserie, NS as to skin eaten                                                                      | 50                 | 4                  | B           | 1             |
| 24102070 | 5000_MPE | Chicken, NS as to part, rotisserie, skin not eaten                                                                           | 50                 | 4                  | B           | 1             |
| 24100000 | 5000_MPE | Chicken, NS as to part and cooking method, NS as to skin eaten                                                               | 50                 | 4                  | B           | 1             |
| 24100020 | 5000_MPE | Chicken, NS as to part and cooking method, skin not eaten                                                                    | 50                 | 4                  | B           | 1             |
| 24201370 | 5000_MPE | Turkey, light or dark meat, fried, coated, skin eaten                                                                        | 50                 | 4                  | B           | 2             |
| 32105180 | 5000_MPE | Huevos rancheros                                                                                                             | 50                 | 4                  | B           | 3             |
| 32130630 | 5000_MPE | Egg omelet or scrambled egg, with cheese and dark-green vegetables, fat added in cooking                                     | 50                 | 3                  | C           | 2             |
| 32130650 | 5000_MPE | Egg omelet or scrambled egg, with cheese and dark-green vegetables, NS as to fat added in cooking                            | 50                 | 3                  | C           | 2             |
| 31202000 | 5000_MPE | Goose egg, cooked                                                                                                            | 50                 | 3                  | D           | 1             |
| 32130660 | 5000_MPE | Egg omelet or scrambled egg, with cheese, tomatoes, and dark-green vegetables, fat added in cooking                          | 50                 | 3                  | C           | 2             |
| 32130680 | 5000_MPE | Egg omelet or scrambled egg, with cheese, tomatoes, and dark-green vegetables, NS as to fat added in cooking                 | 50                 | 3                  | C           | 2             |
| 33401000 | 5000_MPE | Egg substitute, omelet, scrambled, or fried, with cheese, fat added in cooking                                               | 50                 | 3                  | D           | 3             |
| 33401020 | 5000_MPE | Egg substitute, omelet, scrambled, or fried, with cheese, NS as to fat added in cooking                                      | 50                 | 3                  | D           | 3             |
| 32103020 | 5000_MPE | Egg salad, made with mayonnaise-type salad dressing                                                                          | 49                 | 3                  | C           | 3             |
| 23321250 | 5000_MPE | Venison/deer steak, breaded or floured, cooked, NS as to cooking method                                                      | 49                 | 4                  | B           | 3             |
| 24202600 | 5000_MPE | Turkey, neck                                                                                                                 | 49                 | 3.5                | C           | 1             |
| 32130600 | 5000_MPE | Egg omelet or scrambled egg, with cheese and tomatoes, fat added in cooking                                                  | 49                 | 3.5                | B           | 2             |
| 32130620 | 5000_MPE | Egg omelet or scrambled egg, with cheese and tomatoes, NS as to fat added in cooking                                         | 49                 | 3.5                | B           | 2             |
| 24133220 | 5000_MPE | Chicken leg, drumstick and thigh, stewed, skin not eaten                                                                     | 49                 | 4                  | C           | 1             |
| 24127500 | 5000_MPE | Chicken breast, baked, coated, skin / coating eaten                                                                          | 49                 | 4                  | B           | 2             |
| 32130690 | 5000_MPE | Egg omelet or scrambled egg, with cheese and vegetables other than dark green and/or tomatoes, fat added in cooking          | 49                 | 3                  | C           | 2             |
| 32130710 | 5000_MPE | Egg omelet or scrambled egg, with cheese and vegetables other than dark green and/or tomatoes, NS as to fat added in cooking | 49                 | 3                  | C           | 2             |
| 24201420 | 5000_MPE | Turkey light or dark meat, stewed, skin eaten                                                                                | 49                 | 4                  | C           | 1             |
| 24147301 | 5000_MPE | Chicken drumstick, fried, coated, skin / coating not eaten, from raw                                                         | 49                 | 4                  | B           | 2             |
| 73305020 | 5000_MPE | Squash, winter, souffle                                                                                                      | 49                 | 4.5                | A           | 1             |
| 32130070 | 5000_MPE | Egg omelet or scrambled egg, made without fat                                                                                | 49                 | 3.5                | C           | 1             |
| 24102010 | 5000_MPE | Chicken, NS as to part, baked, broiled, or roasted, skin eaten                                                               | 49                 | 4                  | B           | 1             |
| 24153220 | 5000_MPE | Chicken thigh, stewed, skin not eaten                                                                                        | 49                 | 4                  | C           | 1             |
| 31106010 | 5000_MPE | Egg, whole, baked, fat not added in cooking                                                                                  | 48                 | 3.5                | B           | 1             |
| 32130060 | 5000_MPE | Egg omelet or scrambled egg, made with cooking spray                                                                         | 48                 | 3.5                | C           | 2             |
| 24202020 | 5000_MPE | Turkey, drumstick, cooked, skin eaten                                                                                        | 48                 | 4                  | C           | 1             |
| 31103010 | 5000_MPE | Egg, whole, boiled or poached                                                                                                | 48                 | 3.5                | C           | 1             |
| 25170420 | 5000_MPE | Gizzard, cooked                                                                                                              | 48                 | 4.5                | B           | 1             |
| 24123311 | 5000_MPE | Chicken breast, grilled with sauce, skin not eaten                                                                           | 48                 | 4                  | C           | 3             |
| 24122170 | 5000_MPE | Chicken breast, rotisserie, skin eaten                                                                                       | 48                 | 4                  | B           | 1             |
| 24120110 | 5000_MPE | Chicken breast, NS as to cooking method, skin eaten                                                                          | 48                 | 4                  | B           | 1             |
| 24142300 | 5000_MPE | Chicken drumstick, baked, broiled, or roasted, skin eaten, from raw                                                          | 48                 | 4                  | B           | 1             |
| 24132241 | 5000_MPE | Chicken leg, drumstick and thigh, rotisserie, skin not eaten                                                                 | 48                 | 4                  | C           | 1             |
| 24130220 | 5000_MPE | Chicken leg, drumstick and thigh, NS as to cooking method, skin not eaten                                                    | 48                 | 4                  | C           | 1             |
| 32103015 | 5000_MPE | Egg salad, made with light mayonnaise                                                                                        | 47                 | 3                  | C           | 3             |
| 32103025 | 5000_MPE | Egg salad, made with light mayonnaise-type salad dressing                                                                    | 47                 | 3                  | C           | 3             |
| 24142500 | 5000_MPE | Chicken drumstick, grilled without sauce, skin eaten                                                                         | 47                 | 4                  | C           | 2             |
| 24144300 | 5000_MPE | Chicken drumstick, sauteed, skin eaten                                                                                       | 47                 | 4                  | C           | 2             |
| 31201000 | 5000_MPE | Duck egg, cooked                                                                                                             | 47                 | 3                  | D           | 1             |
| 24201060 | 5000_MPE | Turkey, light meat, breaded, baked or fried, skin not eaten                                                                  | 47                 | 4.5                | A           | 3             |
| 24137301 | 5000_MPE | Chicken leg, drumstick and thigh, fried, coated, skin / coating not eaten                                                    | 47                 | 4                  | B           | 2             |
| 31105030 | 5000_MPE | Egg, whole, fried with oil                                                                                                   | 47                 | 3                  | D           | 2             |
| 32103045 | 5000_MPE | Egg salad, made with light Italian dressing                                                                                  | 47                 | 3                  | C           | 3             |
| 24103010 | 5000_MPE | Chicken, NS as to part, stewed, skin eaten                                                                                   | 47                 | 4                  | B           | 1             |
| 32130000 | 5000_MPE | Egg omelet or scrambled egg, made with margarine                                                                             | 47                 | 3                  | C           | 3             |
| 72125240 | 5000_MPE | Spinach souffle                                                                                                              | 47                 | 3.5                | B           | 1             |
| 24201070 | 5000_MPE | Turkey, light meat, breaded, baked or fried, skin eaten                                                                      | 47                 | 4                  | B           | 3             |
| 31111000 | 5000_MPE | Egg, yolk only, cooked, NS as to fat added in cooking                                                                        | 47                 | 1.5                | D           | 2             |
| 31111020 | 5000_MPE | Egg, yolk only, cooked, fat added in cooking                                                                                 | 47                 | 1.5                | D           | 2             |
| 25112200 | 5000_MPE | Liver paste or pate, chicken                                                                                                 | 47                 | 3.5                | C           | 3             |
| 23323500 | 5000_MPE | Bear, cooked                                                                                                                 | 46                 | 4                  | C           | 1             |
| 24157301 | 5000_MPE | Chicken thigh, fried, coated, skin / coating not eaten, from raw                                                             | 46                 | 4                  | B           | 2             |
| 31106000 | 5000_MPE | Egg, whole, baked, NS as to fat added in cooking                                                                             | 46                 | 3                  | C           | 3             |
| 31106020 | 5000_MPE | Egg, whole, baked, fat added in cooking                                                                                      | 46                 | 3                  | C           | 3             |
| 23335100 | 5000_MPE | Raccoon, cooked                                                                                                              | 46                 | 4                  | C           | 1             |
| 24102060 | 5000_MPE | Chicken, NS as to part, rotisserie, skin eaten                                                                               | 46                 | 4                  | B           | 1             |
| 24100010 | 5000_MPE | Chicken, NS as to part and cooking method, skin eaten                                                                        | 46                 | 4                  | B           | 1             |
| 24122151 | 5000_MPE | Chicken breast, baked or broiled, skin not eaten, from fast food / restaurant                                                | 46                 | 4                  | B           | 4             |
| 24152301 | 5000_MPE | Chicken thigh, rotisserie, skin not eaten                                                                                    | 46                 | 4                  | B           | 1             |
| 24150220 | 5000_MPE | Chicken thigh, NS as to cooking method, skin not eaten                                                                       | 46                 | 4                  | B           | 1             |
| 32400510 | 5000_MPE | Egg white, omelet, scrambled, or fried, with cheese and vegetables, fat not added in cooking                                 | 46                 | 3.5                | B           | 3             |
| 32129990 | 5000_MPE | Egg omelet or scrambled egg, NS as to fat added in cooking                                                                   | 46                 | 3                  | C           | 3             |
| 32130065 | 5000_MPE | Egg omelet or scrambled egg, NS as to type of fat                                                                            | 46                 | 3                  | C           | 3             |
| 24127200 | 5000_MPE | Chicken breast, fried, coated, skin / coating eaten, from raw                                                                | 46                 | 4                  | C           | 2             |
| 31108100 | 5000_MPE | Egg, white, cooked, NS as to fat added in cooking                                                                            | 46                 | 3.5                | B           | 3             |
| 31108120 | 5000_MPE | Egg, white, cooked, fat added in cooking                                                                                     | 46                 | 3.5                | B           | 3             |
| 24132230 | 5000_MPE | Chicken leg, drumstick and thigh, baked or broiled, skin eaten                                                               | 45                 | 4                  | C           | 1             |
| 32130160 | 5000_MPE | Egg omelet or scrambled egg, with cheese, made with cooking spray                                                            | 45                 | 3                  | D           | 2             |
| 24311010 | 5000_MPE | Goose, wild, roasted                                                                                                         | 45                 | 3.5                | D           | 1             |

| foodcode | level1nd | Description                                                                                                                | Food Compass Score | Health Star Rating | Nutri-Score | NOVA Category |
|----------|----------|----------------------------------------------------------------------------------------------------------------------------|--------------------|--------------------|-------------|---------------|
| 24143210 | 5000_MPE | Chicken drumstick, stewed, skin eaten                                                                                      | 45                 | 4                  | C           | 1             |
| 24134100 | 5000_MPE | Chicken leg, drumstick and thigh, grilled without sauce, skin eaten                                                        | 45                 | 3.5                | C           | 2             |
| 24134300 | 5000_MPE | Chicken leg, drumstick and thigh, sauteed, skin eaten                                                                      | 45                 | 3.5                | C           | 2             |
| 32130830 | 5000_MPE | Egg omelet or scrambled egg, with meat and dark-green vegetables, fat added in cooking                                     | 45                 | 3                  | C           | 3             |
| 32130850 | 5000_MPE | Egg omelet or scrambled egg, with meat and dark-green vegetables, NS as to fat added in cooking                            | 45                 | 3                  | C           | 3             |
| 24142400 | 5000_MPE | Chicken drumstick, rotisserie, skin eaten                                                                                  | 45                 | 4                  | C           | 1             |
| 24140210 | 5000_MPE | Chicken drumstick, NS as to cooking method, skin eaten                                                                     | 45                 | 4                  | C           | 1             |
| 32130170 | 5000_MPE | Egg omelet or scrambled egg, with cheese, made without fat                                                                 | 44                 | 3                  | D           | 2             |
| 32103035 | 5000_MPE | Egg salad, made with light creamy dressing                                                                                 | 44                 | 3.5                | C           | 3             |
| 32103040 | 5000_MPE | Egg salad, made with Italian dressing                                                                                      | 44                 | 3                  | C           | 3             |
| 24147302 | 5000_MPE | Chicken drumstick, fried, coated, prepared skinless, coating eaten, from raw                                               | 44                 | 3.5                | C           | 2             |
| 33401500 | 5000_MPE | Egg substitute, omelet, scrambled, or fried, with meat and vegetables, fat added in cooking                                | 44                 | 3                  | C           | 3             |
| 33401520 | 5000_MPE | Egg substitute, omelet, scrambled, or fried, with meat and vegetables, NS as to fat added in cooking                       | 44                 | 3                  | C           | 3             |
| 33001040 | 5000_MPE | Egg substitute, omelet, scrambled, or fried, made with cooking spray                                                       | 44                 | 3.5                | B           | 2             |
| 24103070 | 5000_MPE | Chicken, NS as to part, grilled with sauce, NS as to skin eaten                                                            | 44                 | 3.5                | C           | 3             |
| 24103080 | 5000_MPE | Chicken, NS as to part, grilled with sauce, skin not eaten                                                                 | 44                 | 3.5                | C           | 3             |
| 24198570 | 5000_MPE | Chicken, canned, meat only                                                                                                 | 44                 | 4                  | C           | 3             |
| 24206000 | 5000_MPE | Turkey, canned                                                                                                             | 44                 | 4                  | C           | 3             |
| 24198742 | 5000_MPE | Chicken tenders or strips, breaded, from restaurant                                                                        | 44                 | 2                  | D           | 2             |
| 24152230 | 5000_MPE | Chicken thigh, baked, broiled, or roasted, skin eaten, from raw                                                            | 44                 | 3.5                | C           | 1             |
| 33001000 | 5000_MPE | Egg substitute, omelet, scrambled, or fried, made with margarine                                                           | 44                 | 3.5                | C           | 4             |
| 31111010 | 5000_MPE | Egg, yolk only, cooked, fat not added in cooking                                                                           | 44                 | 1.5                | D           | 1             |
| 32130860 | 5000_MPE | Egg omelet or scrambled egg, with meat, tomatoes, and dark-green vegetables, fat added in cooking                          | 44                 | 3                  | C           | 3             |
| 32130880 | 5000_MPE | Egg omelet or scrambled egg, with meat, tomatoes, and dark-green vegetables, NS as to fat added in cooking                 | 44                 | 3                  | C           | 3             |
| 23150270 | 5000_MPE | Goat head, cooked                                                                                                          | 44                 | 4                  | B           | 1             |
| 32130110 | 5000_MPE | Egg omelet or scrambled egg, with cheese, made with oil                                                                    | 43                 | 3                  | D           | 2             |
| 24154010 | 5000_MPE | Chicken thigh, grilled without sauce, skin eaten                                                                           | 43                 | 3.5                | D           | 2             |
| 24154300 | 5000_MPE | Chicken thigh, sauteed, skin eaten                                                                                         | 43                 | 3.5                | D           | 2             |
| 32103050 | 5000_MPE | Egg Salad, made with any type of fat free dressing                                                                         | 43                 | 3.5                | B           | 2             |
| 24147400 | 5000_MPE | Chicken drumstick, baked, coated, skin / coating eaten                                                                     | 43                 | 4                  | C           | 2             |
| 23334100 | 5000_MPE | Beaver, cooked                                                                                                             | 43                 | 4                  | B           | 1             |
| 32400100 | 5000_MPE | Egg white, omelet, scrambled, or fried, with cheese, fat added in cooking                                                  | 43                 | 3                  | C           | 3             |
| 32400120 | 5000_MPE | Egg white, omelet, scrambled, or fried, with cheese, NS as to fat added in cooking                                         | 43                 | 3                  | C           | 3             |
| 32130890 | 5000_MPE | Egg omelet or scrambled egg, with meat and vegetables other than dark-green and/or tomatoes, fat added in cooking          | 43                 | 3                  | D           | 3             |
| 32130910 | 5000_MPE | Egg omelet or scrambled egg, with meat and vegetables other than dark-green and/or tomatoes, NS as to fat added in cooking | 43                 | 3                  | D           | 3             |
| 24132240 | 5000_MPE | Chicken leg, drumstick and thigh, rotisserie, skin eaten                                                                   | 43                 | 4                  | C           | 1             |
| 24130210 | 5000_MPE | Chicken leg, drumstick and thigh, NS as to cooking method, skin eaten                                                      | 43                 | 4                  | C           | 1             |
| 24133210 | 5000_MPE | Chicken leg, drumstick and thigh, stewed, skin eaten                                                                       | 43                 | 3.5                | C           | 1             |
| 24205000 | 5000_MPE | Turkey, tail                                                                                                               | 42                 | 2                  | D           | 1             |
| 32130800 | 5000_MPE | Egg omelet or scrambled egg, with meat and tomatoes, fat added in cooking                                                  | 42                 | 3                  | C           | 3             |
| 32130820 | 5000_MPE | Egg omelet or scrambled egg, with meat and tomatoes, NS as to fat added in cooking                                         | 42                 | 3                  | C           | 3             |
| 31107000 | 5000_MPE | Egg, whole, pickled                                                                                                        | 42                 | 3.5                | C           | 3             |
| 24157302 | 5000_MPE | Chicken thigh, fried, coated, prepared skinless, coating eaten, from raw                                                   | 42                 | 4                  | C           | 2             |
| 31108010 | 5000_MPE | Egg, white only, raw                                                                                                       | 42                 | 4                  | A           | 1             |
| 32400075 | 5000_MPE | Egg white omelet, scrambled, or fried, made with cooking spray                                                             | 42                 | 4                  | B           | 2             |
| 24302010 | 5000_MPE | Duck, pressed, Chinese                                                                                                     | 42                 | 3.5                | C           | 2             |
| 31203000 | 5000_MPE | Quail egg, canned                                                                                                          | 42                 | 3                  | D           | 3             |
| 31105010 | 5000_MPE | Egg, whole, fried without fat                                                                                              | 41                 | 3.5                | C           | 1             |
| 24153210 | 5000_MPE | Chicken thigh, stewed, skin eaten                                                                                          | 41                 | 3.5                | C           | 1             |
| 24123310 | 5000_MPE | Chicken breast, grilled with sauce, skin eaten                                                                             | 41                 | 3.5                | C           | 2             |
| 24152300 | 5000_MPE | Chicken thigh, rotisserie, skin eaten                                                                                      | 41                 | 4                  | C           | 1             |
| 24150210 | 5000_MPE | Chicken thigh, NS as to cooking method, skin eaten                                                                         | 41                 | 4                  | C           | 1             |
| 23324100 | 5000_MPE | Caribou, cooked                                                                                                            | 41                 | 4.5                | B           | 1             |
| 24127211 | 5000_MPE | Chicken breast, fried, coated, skin / coating not eaten, from pre-cooked                                                   | 41                 | 4                  | B           | 4             |
| 24142321 | 5000_MPE | Chicken drumstick, baked or broiled, skin not eaten, from fast food / restaurant                                           | 41                 | 4                  | C           | 4             |
| 24164000 | 5000_MPE | Chicken wing, grilled without sauce                                                                                        | 41                 | 3.5                | D           | 2             |
| 24164200 | 5000_MPE | Chicken wing, sauteed                                                                                                      | 41                 | 3.5                | D           | 2             |
| 24137310 | 5000_MPE | Chicken leg, drumstick and thigh, baked, coated, skin / coating eaten                                                      | 41                 | 3.5                | C           | 2             |
| 24142511 | 5000_MPE | Chicken drumstick, grilled with sauce, skin not eaten                                                                      | 41                 | 3.5                | C           | 3             |
| 22210310 | 5000_MPE | Pork, tenderloin, breaded, fried                                                                                           | 41                 | 3.5                | C           | 3             |
| 24147300 | 5000_MPE | Chicken drumstick, fried, coated, skin / coating eaten, from raw                                                           | 40                 | 3.5                | C           | 2             |
| 21401400 | 5000_MPE | Beef, roast, canned                                                                                                        | 40                 | 4                  | B           | 3             |
| 31105080 | 5000_MPE | Egg, whole, fried with cooking spray                                                                                       | 40                 | 3.5                | C           | 2             |
| 24134151 | 5000_MPE | Chicken leg, drumstick and thigh, grilled with sauce, skin not eaten                                                       | 40                 | 3.5                | C           | 2             |
| 24198735 | 5000_MPE | Chicken nuggets, from school lunch                                                                                         | 40                 | 3.5                | B           | 4             |
| 24198745 | 5000_MPE | Chicken tenders or strips, breaded, from school lunch                                                                      | 40                 | 3.5                | B           | 4             |
| 23323100 | 5000_MPE | Moose, cooked                                                                                                              | 40                 | 4.5                | A           | 1             |
| 24162130 | 5000_MPE | Chicken wing, baked, broiled, or roasted, from raw                                                                         | 40                 | 3.5                | D           | 1             |
| 24122150 | 5000_MPE | Chicken breast, baked or broiled, skin eaten, from fast food / restaurant                                                  | 40                 | 4                  | C           | 4             |
| 32105330 | 5000_MPE | Scrambled eggs with jerked beef, Puerto Rican style                                                                        | 40                 | 1                  | D           | 3             |
| 22701020 | 5000_MPE | Pork, spareribs, cooked, lean only eaten                                                                                   | 40                 | 4                  | C           | 1             |
| 24157400 | 5000_MPE | Chicken thigh, baked, coated, skin / coating eaten                                                                         | 39                 | 3.5                | C           | 2             |
| 32130040 | 5000_MPE | Egg omelet or scrambled egg, made with animal fat or meat drippings                                                        | 39                 | 3                  | C           | 2             |
| 24201360 | 5000_MPE | Turkey, light or dark meat, fried, coated, skin not eaten                                                                  | 39                 | 4                  | B           | 4             |
| 32400055 | 5000_MPE | Egg white omelet, scrambled, or fried, NS as to fat added in cooking                                                       | 39                 | 3.5                | B           | 3             |
| 32400078 | 5000_MPE | Egg white omelet, scrambled, or fried, NS as to type of fat                                                                | 39                 | 3.5                | B           | 3             |
| 24107081 | 5000_MPE | Chicken, NS as to part, baked, coated, skin / coating not eaten                                                            | 39                 | 4                  | C           | 4             |
| 24157331 | 5000_MPE | Chicken thigh, fried, coated, skin / coating not eaten, from restaurant                                                    | 39                 | 3.5                | C           | 3             |
| 23310000 | 5000_MPE | Rabbit, NS as to domestic or wild, cooked                                                                                  | 39                 | 4                  | B           | 1             |
| 23311100 | 5000_MPE | Rabbit, domestic, NS as to cooking method                                                                                  | 39                 | 4                  | B           | 1             |
| 32130840 | 5000_MPE | Egg omelet or scrambled egg, with meat and dark-green vegetables, fat not added in cooking                                 | 39                 | 3.5                | C           | 3             |
| 32400600 | 5000_MPE | Egg white, omelet, scrambled, or fried, with meat and vegetables, fat added in cooking                                     | 39                 | 3                  | C           | 3             |
| 32400620 | 5000_MPE | Egg white, omelet, scrambled, or fried, with meat and vegetables, NS as to fat added in cooking                            | 39                 | 3                  | C           | 3             |
| 31105005 | 5000_MPE | Egg, whole, fried, NS as to fat added in cooking                                                                           | 39                 | 3                  | D           | 3             |
| 31105085 | 5000_MPE | Egg, whole, fried, NS as to type of fat                                                                                    | 39                 | 3                  | D           | 3             |
| 24137300 | 5000_MPE | Chicken leg, drumstick and thigh, fried, coated, skin / coating eaten                                                      | 38                 | 3.5                | C           | 2             |
| 24170200 | 5000_MPE | Chicken, back                                                                                                              | 38                 | 3.5                | D           | 1             |
| 24152251 | 5000_MPE | Chicken thigh, baked or broiled, skin not eaten, from fast food / restaurant                                               | 38                 | 4                  | C           | 4             |
| 24154021 | 5000_MPE | Chicken thigh, grilled with sauce, skin not eaten                                                                          | 38                 | 3.5                | D           | 3             |
| 32130870 | 5000_MPE | Egg omelet or scrambled egg, with meat, tomatoes, and dark-green vegetables, fat not added in cooking                      | 38                 | 3.5                | C           | 3             |
| 24122141 | 5000_MPE | Chicken breast, baked or broiled, skin not eaten, from pre-cooked                                                          | 38                 | 4.5                | A           | 4             |
| 24400010 | 5000_MPE | Cornish game hen, cooked, skin eaten                                                                                       | 38                 | 3.5                | D           | 1             |
| 24401010 | 5000_MPE | Cornish game hen, roasted, skin eaten                                                                                      | 38                 | 3.5                | D           | 1             |
| 24103075 | 5000_MPE | Chicken, NS as to part, grilled with sauce, skin eaten                                                                     | 38                 | 3.5                | C           | 2             |
| 21500000 | 5000_MPE | Ground beef, raw                                                                                                           | 38                 | 3.5                | C           | 1             |
| 24162200 | 5000_MPE | Chicken wing, rotisserie                                                                                                   | 38                 | 2                  | D           | 1             |
| 24160110 | 5000_MPE | Chicken wing, NS as to cooking method                                                                                      | 38                 | 2                  | D           | 1             |
| 24127221 | 5000_MPE | Chicken breast, fried, coated, skin / coating not eaten, from fast food / restaurant                                       | 38                 | 4                  | B           | 4             |
| 32130100 | 5000_MPE | Egg omelet or scrambled egg, with cheese, made with margarine                                                              | 37                 | 3                  | D           | 3             |
| 32130810 | 5000_MPE | Egg omelet or scrambled egg, with meat and tomatoes, fat not added in cooking                                              | 37                 | 3.5                | C           | 3             |
| 32101000 | 5000_MPE | Egg, creamed                                                                                                               | 37                 | 3                  | C           | 1             |
| 24167300 | 5000_MPE | Chicken wing, baked, coated                                                                                                | 37                 | 3.5                | D           | 2             |

| foodcode | level1nd | Description                                                                                                              | Food Compass Score | Health Star Rating | Nutri-Score | NOVA Category |
|----------|----------|--------------------------------------------------------------------------------------------------------------------------|--------------------|--------------------|-------------|---------------|
| 24142311 | 5000_MPE | Chicken drumstick, baked or broiled, skin not eaten, from pre-cooked                                                     | 37                 | 4                  | B           | 4             |
| 24157300 | 5000_MPE | Chicken thigh, fried, coated, skin / coating eaten, from raw                                                             | 37                 | 3.5                | C           | 2             |
| 32131090 | 5000_MPE | Egg omelet or scrambled egg, with cheese, meat, and vegetables other than dark-green and/or tomatoes, fat added in cooki | 37                 | 3                  | D           | 3             |
| 32131110 | 5000_MPE | Egg omelet or scrambled egg, with cheese, meat, and vegetables other than dark-green and/or tomatoes, NS as to fat added | 37                 | 3                  | D           | 3             |
| 23150100 | 5000_MPE | Goat, boiled                                                                                                             | 37                 | 4                  | B           | 1             |
| 23150250 | 5000_MPE | Goat, baked                                                                                                              | 37                 | 4                  | B           | 1             |
| 23150300 | 5000_MPE | Goat ribs, cooked                                                                                                        | 37                 | 4                  | B           | 1             |
| 24168022 | 5000_MPE | Chicken "wings", plain, from other sources                                                                               | 37                 | 2                  | D           | 2             |
| 32131000 | 5000_MPE | Egg omelet or scrambled egg, with cheese, meat, and tomatoes, fat added in cooking                                       | 37                 | 3                  | C           | 3             |
| 32131020 | 5000_MPE | Egg omelet or scrambled egg, with cheese, meat, and tomatoes, NS as to fat added in cooking                              | 37                 | 3                  | C           | 3             |
| 33401600 | 5000_MPE | Egg substitute, omelet, scrambled, or fried, with cheese, meat, and vegetables, fat added in cooking                     | 37                 | 3                  | D           | 3             |
| 33401620 | 5000_MPE | Egg substitute, omelet, scrambled, or fried, with cheese, meat, and vegetables, NS as to fat added in cooking            | 37                 | 3                  | D           | 3             |
| 27250550 | 5000_MPE | Seafood soufflé                                                                                                          | 37                 | 3                  | C           | 2             |
| 24142510 | 5000_MPE | Chicken drumstick, grilled with sauce, skin eaten                                                                        | 37                 | 3.5                | D           | 2             |
| 22000100 | 5000_MPE | Pork, NS as to cut, cooked, NS as to fat eaten                                                                           | 36                 | 3.5                | C           | 1             |
| 22000110 | 5000_MPE | Pork, NS as to cut, cooked, lean and fat eaten                                                                           | 36                 | 3.5                | C           | 1             |
| 22101000 | 5000_MPE | Pork chop, NS as to cooking method, NS as to fat eaten                                                                   | 36                 | 3.5                | C           | 1             |
| 22101010 | 5000_MPE | Pork chop, NS as to cooking method, lean and fat eaten                                                                   | 36                 | 3.5                | C           | 1             |
| 22101100 | 5000_MPE | Pork chop, broiled or baked, NS as to fat eaten                                                                          | 36                 | 3.5                | C           | 1             |
| 22101110 | 5000_MPE | Pork chop, broiled or baked, lean and fat eaten                                                                          | 36                 | 3.5                | C           | 1             |
| 24300110 | 5000_MPE | Duck, cooked, skin eaten                                                                                                 | 36                 | 2                  | D           | 1             |
| 24301010 | 5000_MPE | Duck, roasted, skin eaten                                                                                                | 36                 | 2                  | D           | 1             |
| 23331100 | 5000_MPE | Ground hog, cooked                                                                                                       | 36                 | 4                  | C           | 1             |
| 23326100 | 5000_MPE | Bison, cooked                                                                                                            | 36                 | 4.5                | A           | 1             |
| 24301210 | 5000_MPE | Duck, coated, fried                                                                                                      | 36                 | 4                  | C           | 2             |
| 25221855 | 5000_MPE | Turkey or chicken sausage, reduced sodium                                                                                | 36                 | 4                  | B           | 4             |
| 24134150 | 5000_MPE | Chicken leg, drumstick and thigh, grilled with sauce, skin eaten                                                         | 36                 | 3                  | D           | 2             |
| 24198677 | 5000_MPE | Chicken fillet, breaded                                                                                                  | 36                 | 3.5                | B           | 4             |
| 24198746 | 5000_MPE | Chicken tenders or strips, breaded, from frozen                                                                          | 36                 | 3.5                | B           | 4             |
| 23321000 | 5000_MPE | Venison/deer, NFS                                                                                                        | 36                 | 4.5                | B           | 1             |
| 23321100 | 5000_MPE | Venison/deer, roasted                                                                                                    | 36                 | 4.5                | B           | 1             |
| 23323250 | 5000_MPE | Venison/deer ribs, cooked                                                                                                | 36                 | 4.5                | B           | 1             |
| 23322400 | 5000_MPE | Venison/deer, stewed                                                                                                     | 36                 | 4.5                | B           | 1             |
| 24147311 | 5000_MPE | Chicken drumstick, fried, coated, skin / coating not eaten, from pre-cooked                                              | 36                 | 4                  | B           | 4             |
| 32130020 | 5000_MPE | Egg omelet or scrambled egg, made with butter                                                                            | 36                 | 3                  | D           | 2             |
| 33401010 | 5000_MPE | Egg substitute, omelet, scrambled, or fried, with cheese, fat not added in cooking                                       | 36                 | 3                  | C           | 3             |
| 22201020 | 5000_MPE | Pork steak or cutlet, NS as to cooking method, lean only eaten                                                           | 35                 | 4                  | C           | 1             |
| 22201120 | 5000_MPE | Pork steak or cutlet, broiled or baked, lean only eaten                                                                  | 35                 | 4                  | C           | 1             |
| 33401510 | 5000_MPE | Egg substitute, omelet, scrambled, or fried, with meat and vegetables, fat not added in cooking                          | 35                 | 3.5                | C           | 3             |
| 23150200 | 5000_MPE | Goat, fried                                                                                                              | 35                 | 4                  | B           | 2             |
| 24198500 | 5000_MPE | Chicken feet                                                                                                             | 35                 | 4                  | B           | 1             |
| 32131060 | 5000_MPE | Egg omelet or scrambled egg, with cheese, meat, tomatoes, and dark-green vegetables, fat added in cooking                | 35                 | 3                  | D           | 3             |
| 32131080 | 5000_MPE | Egg omelet or scrambled egg, with cheese, meat, tomatoes, and dark-green vegetables, NS as to fat added in cooking       | 35                 | 3                  | D           | 3             |
| 32130900 | 5000_MPE | Egg omelet or scrambled egg, with meat and vegetables other than dark-green and/or tomatoes, fat not added in cooking    | 35                 | 3                  | C           | 3             |
| 32130210 | 5000_MPE | Egg omelet or scrambled egg, with meat, made with oil                                                                    | 35                 | 3                  | D           | 3             |
| 24163110 | 5000_MPE | Chicken wing, stewed                                                                                                     | 35                 | 3.5                | D           | 1             |
| 23311200 | 5000_MPE | Rabbit, wild, cooked                                                                                                     | 35                 | 4.5                | B           | 1             |
| 24154020 | 5000_MPE | Chicken thigh, grilled with sauce, skin eaten                                                                            | 35                 | 3                  | D           | 2             |
| 32131030 | 5000_MPE | Egg omelet or scrambled egg, with cheese, meat, and dark-green vegetables, fat added in cooking                          | 35                 | 2                  | D           | 3             |
| 32131050 | 5000_MPE | Egg omelet or scrambled egg, with cheese, meat, and dark-green vegetables, NS as to fat added in cooking                 | 35                 | 2                  | D           | 3             |
| 24122140 | 5000_MPE | Chicken breast, baked or broiled, skin eaten, from pre-cooked                                                            | 35                 | 4                  | B           | 4             |
| 24198747 | 5000_MPE | Chicken tenders or strips, breaded, from other sources                                                                   | 34                 | 3.5                | D           | 4             |
| 24142320 | 5000_MPE | Chicken drumstick, baked or broiled, skin eaten, from fast food / restaurant                                             | 34                 | 3.5                | C           | 4             |
| 24198739 | 5000_MPE | Chicken tenders or strips, NFS                                                                                           | 34                 | 2                  | D           | 4             |
| 24198741 | 5000_MPE | Chicken tenders or strips, breaded, from fast food                                                                       | 34                 | 2                  | D           | 4             |
| 22002100 | 5000_MPE | Pork, ground or patty, breaded, cooked                                                                                   | 34                 | 2                  | D           | 3             |
| 24198671 | 5000_MPE | Chicken patty, breaded                                                                                                   | 34                 | 3                  | D           | 4             |
| 33001050 | 5000_MPE | Egg substitute, omelet, scrambled, or fried, made without fat                                                            | 34                 | 3.5                | B           | 4             |
| 33001110 | 5000_MPE | Egg substitute, cheese flavored, omelet, scrambled, or fried, fat not added in cooking                                   | 34                 | 3.5                | B           | 4             |
| 33001210 | 5000_MPE | Egg substitute, vegetable flavored, omelet, scrambled, or fried, fat not added in cooking                                | 34                 | 3.5                | B           | 4             |
| 22301120 | 5000_MPE | Ham, fresh, cooked, lean only eaten                                                                                      | 34                 | 4                  | C           | 1             |
| 21420100 | 5000_MPE | Beef, sandwich steak, flaked, formed, thinly sliced                                                                      | 34                 | 2                  | D           | 2             |
| 22400120 | 5000_MPE | Pork roast, NS as to cut, cooked, lean only eaten                                                                        | 34                 | 4                  | C           | 1             |
| 22401020 | 5000_MPE | Pork roast, loin, cooked, lean only eaten                                                                                | 34                 | 4                  | C           | 1             |
| 24180200 | 5000_MPE | Chicken, neck or ribs                                                                                                    | 34                 | 3.5                | D           | 1             |
| 24167200 | 5000_MPE | Chicken wing, fried, coated, from raw                                                                                    | 34                 | 3.5                | D           | 2             |
| 22402510 | 5000_MPE | Fried pork chunks, Puerto Rican style                                                                                    | 34                 | 4                  | D           | 1             |
| 22210300 | 5000_MPE | Pork, tenderloin, cooked, NS as to cooking method                                                                        | 33                 | 4                  | C           | 1             |
| 22210400 | 5000_MPE | Pork, tenderloin, baked                                                                                                  | 33                 | 4                  | C           | 1             |
| 22000300 | 5000_MPE | Pork, NS as to cut, breaded or floured, fried, NS as to fat eaten                                                        | 33                 | 3.5                | C           | 3             |
| 22000320 | 5000_MPE | Pork, NS as to cut, breaded or floured, fried, lean only eaten                                                           | 33                 | 3.5                | C           | 3             |
| 22101320 | 5000_MPE | Pork chop, breaded or floured, fried, lean only eaten                                                                    | 33                 | 3.5                | C           | 3             |
| 21000100 | 5000_MPE | Beef, NS as to cut, cooked, NS as to fat eaten                                                                           | 33                 | 4                  | C           | 1             |
| 21000120 | 5000_MPE | Beef, NS as to cut, cooked, lean only eaten                                                                              | 33                 | 4                  | C           | 1             |
| 21001000 | 5000_MPE | Steak, NS as to type of meat, cooked, NS as to fat eaten                                                                 | 33                 | 4                  | C           | 1             |
| 21001020 | 5000_MPE | Steak, NS as to type of meat, cooked, lean only eaten                                                                    | 33                 | 4                  | C           | 1             |
| 21101000 | 5000_MPE | Beef steak, NS as to cooking method, NS as to fat eaten                                                                  | 33                 | 4                  | C           | 1             |
| 21101020 | 5000_MPE | Beef steak, NS as to cooking method, lean only eaten                                                                     | 33                 | 4                  | C           | 1             |
| 21101110 | 5000_MPE | Beef steak, broiled or baked, NS as to fat eaten                                                                         | 33                 | 4                  | C           | 1             |
| 21101130 | 5000_MPE | Beef steak, broiled or baked, lean only eaten                                                                            | 33                 | 4                  | C           | 1             |
| 24164010 | 5000_MPE | Chicken wing, grilled with sauce                                                                                         | 33                 | 2                  | D           | 2             |
| 33401100 | 5000_MPE | Egg substitute, omelet, scrambled, or fried, with meat, fat added in cooking                                             | 33                 | 2                  | D           | 3             |
| 33401120 | 5000_MPE | Egg substitute, omelet, scrambled, or fried, with meat, NS as to fat added in cooking                                    | 33                 | 2                  | D           | 3             |
| 20000000 | 5000_MPE | Meat, NFS                                                                                                                | 33                 | 4                  | C           | 1             |
| 24157311 | 5000_MPE | Chicken thigh, fried, coated, skin / coating not eaten, from pre-cooked                                                  | 33                 | 4                  | C           | 4             |
| 22000310 | 5000_MPE | Pork, NS as to cut, breaded or floured, fried, lean and fat eaten                                                        | 33                 | 3.5                | D           | 2             |
| 22101300 | 5000_MPE | Pork chop, breaded or floured, fried, NS as to fat eaten                                                                 | 33                 | 3.5                | D           | 2             |
| 22101310 | 5000_MPE | Pork chop, breaded or floured, fried, lean and fat eaten                                                                 | 33                 | 3.5                | D           | 2             |
| 32130140 | 5000_MPE | Egg omelet or scrambled egg, with cheese, made with animal fat or meat drippings                                         | 33                 | 3                  | D           | 2             |
| 21401110 | 5000_MPE | Beef, roast, roasted, lean and fat eaten                                                                                 | 33                 | 4                  | B           | 1             |
| 24152241 | 5000_MPE | Chicken thigh, baked or broiled, skin not eaten, from pre-cooked                                                         | 33                 | 4                  | B           | 4             |
| 22400100 | 5000_MPE | Pork roast, NS as to cut, cooked, NS as to fat eaten                                                                     | 33                 | 3.5                | D           | 1             |
| 22400110 | 5000_MPE | Pork roast, NS as to cut, cooked, lean and fat eaten                                                                     | 33                 | 3.5                | D           | 1             |
| 22401000 | 5000_MPE | Pork roast, loin, cooked, NS as to fat eaten                                                                             | 33                 | 3.5                | D           | 1             |
| 22401010 | 5000_MPE | Pork roast, loin, cooked, lean and fat eaten                                                                             | 33                 | 3.5                | D           | 1             |
| 22201000 | 5000_MPE | Pork steak or cutlet, NS as to cooking method, NS as to fat eaten                                                        | 32                 | 3.5                | D           | 1             |
| 22201010 | 5000_MPE | Pork steak or cutlet, NS as to cooking method, lean and fat eaten                                                        | 32                 | 3.5                | D           | 1             |
| 22201100 | 5000_MPE | Pork steak or cutlet, broiled or baked, NS as to fat eaten                                                               | 32                 | 3.5                | D           | 1             |
| 22201110 | 5000_MPE | Pork steak or cutlet, broiled or baked, lean and fat eaten                                                               | 32                 | 3.5                | D           | 1             |
| 24107071 | 5000_MPE | Chicken, NS as to part, fried, coated, skin / coating not eaten                                                          | 32                 | 4                  | C           | 4             |
| 22101130 | 5000_MPE | Pork chop, breaded or floured, broiled or baked, NS as to fat eaten                                                      | 32                 | 3.5                | D           | 3             |
| 22101140 | 5000_MPE | Pork chop, breaded or floured, broiled or baked, lean and fat eaten                                                      | 32                 | 3.5                | D           | 3             |

| foodcode | level1nd | Description                                                                                                              | Food Compass Score | Health Star Rating | Nutri-Score | NOVA Category |
|----------|----------|--------------------------------------------------------------------------------------------------------------------------|--------------------|--------------------|-------------|---------------|
| 24127210 | 5000_MPE | Chicken breast, fried, coated, skin / coating eaten, from pre-cooked                                                     | 32                 | 4                  | C           | 4             |
| 32400060 | 5000_MPE | Egg white omelet, scrambled, or fried, made with margarine                                                               | 32                 | 3.5                | B           | 4             |
| 24198340 | 5000_MPE | Chicken, tail                                                                                                            | 32                 | 3.5                | C           | 1             |
| 24198729 | 5000_MPE | Chicken nuggets, NFS                                                                                                     | 32                 | 3                  | D           | 4             |
| 24198731 | 5000_MPE | Chicken nuggets, from fast food                                                                                          | 32                 | 3                  | D           | 4             |
| 24198732 | 5000_MPE | Chicken nuggets, from restaurant                                                                                         | 32                 | 3                  | D           | 4             |
| 25160000 | 5000_MPE | Tongue, cooked                                                                                                           | 32                 | 2                  | D           | 1             |
| 22705010 | 5000_MPE | Pork ears, tail, head, snout, miscellaneous parts, cooked                                                                | 32                 | 3.5                | C           | 1             |
| 22201420 | 5000_MPE | Pork steak or cutlet, breaded or floured, fried, lean only eaten                                                         | 32                 | 3.5                | C           | 3             |
| 23204030 | 5000_MPE | Veal cutlet or steak, NS as to cooking method, lean only eaten                                                           | 32                 | 4                  | B           | 1             |
| 23204220 | 5000_MPE | Veal cutlet or steak, broiled, lean only eaten                                                                           | 32                 | 4                  | B           | 1             |
| 22201320 | 5000_MPE | Pork steak or cutlet, breaded or floured, broiled or baked, lean only eaten                                              | 32                 | 3.5                | C           | 2             |
| 22708010 | 5000_MPE | Pork, pig's hocks, cooked                                                                                                | 32                 | 3.5                | C           | 1             |
| 22210350 | 5000_MPE | Pork, tenderloin, braised                                                                                                | 32                 | 4                  | B           | 1             |
| 22411020 | 5000_MPE | Pork roast, shoulder, cooked, lean only eaten                                                                            | 32                 | 3.5                | C           | 1             |
| 32131010 | 5000_MPE | Egg omelet or scrambled egg, with cheese, meat, and tomatoes, fat not added in cooking                                   | 32                 | 3                  | C           | 3             |
| 32400700 | 5000_MPE | Egg white, omelet, scrambled, or fried, with cheese, meat, and vegetables, fat added in cooking                          | 32                 | 3                  | D           | 3             |
| 32400720 | 5000_MPE | Egg white, omelet, scrambled, or fried, with cheese, meat, and vegetables, NS as to fat added in cooking                 | 32                 | 3                  | D           | 3             |
| 31105060 | 5000_MPE | Egg, whole, fried with animal fat or meat drippings                                                                      | 32                 | 3                  | D           | 2             |
| 24142310 | 5000_MPE | Chicken drumstick, baked or broiled, skin eaten, from pre-cooked                                                         | 32                 | 4                  | C           | 4             |
| 24168031 | 5000_MPE | Chicken "wings", boneless, with hot sauce, from other sources                                                            | 31                 | 2                  | D           | 3             |
| 32130200 | 5000_MPE | Egg omelet or scrambled egg, with meat, made with margarine                                                              | 31                 | 2                  | D           | 3             |
| 21000110 | 5000_MPE | Beef, NS as to cut, cooked, lean and fat eaten                                                                           | 31                 | 3.5                | D           | 1             |
| 21101010 | 5000_MPE | Beef steak, NS as to cooking method, lean and fat eaten                                                                  | 31                 | 3.5                | D           | 1             |
| 21101120 | 5000_MPE | Beef steak, broiled or baked, lean and fat eaten                                                                         | 31                 | 3.5                | D           | 1             |
| 22000120 | 5000_MPE | Pork, NS as to cut, cooked, lean only eaten                                                                              | 31                 | 4                  | C           | 1             |
| 22101020 | 5000_MPE | Pork chop, NS as to cooking method, lean only eaten                                                                      | 31                 | 4                  | C           | 1             |
| 22101120 | 5000_MPE | Pork chop, broiled or baked, lean only eaten                                                                             | 31                 | 4                  | C           | 1             |
| 32130190 | 5000_MPE | Egg omelet or scrambled egg, with meat, NS as to fat added in cooking                                                    | 31                 | 2                  | D           | 3             |
| 32130265 | 5000_MPE | Egg omelet or scrambled egg, with meat, NS as to type of fat                                                             | 31                 | 2                  | D           | 3             |
| 32130080 | 5000_MPE | Egg omelet or scrambled egg, from fast food / restaurant                                                                 | 31                 | 3                  | C           | 4             |
| 24147321 | 5000_MPE | Chicken drumstick, fried, coated, skin / coating not eaten, from fast food / restaurant                                  | 31                 | 3.5                | C           | 4             |
| 22101150 | 5000_MPE | Pork chop, breaded or floured, broiled or baked, lean only eaten                                                         | 31                 | 3.5                | C           | 3             |
| 32130260 | 5000_MPE | Egg omelet or scrambled egg, with meat, made with cooking spray                                                          | 31                 | 2                  | D           | 3             |
| 32130310 | 5000_MPE | Egg omelet or scrambled egg, with cheese and meat, made with oil                                                         | 31                 | 1.5                | D           | 3             |
| 32130120 | 5000_MPE | Egg omelet or scrambled egg, with cheese, made with butter                                                               | 31                 | 2                  | D           | 2             |
| 21401000 | 5000_MPE | Beef, roast, roasted, NS as to fat eaten                                                                                 | 31                 | 4                  | B           | 1             |
| 25170110 | 5000_MPE | Tripe, cooked                                                                                                            | 31                 | 3.5                | B           | 1             |
| 22301000 | 5000_MPE | Ham, fresh, cooked, NS as to fat eaten                                                                                   | 31                 | 2                  | D           | 1             |
| 22301110 | 5000_MPE | Ham, fresh, cooked, lean and fat eaten                                                                                   | 31                 | 2                  | D           | 1             |
| 22210450 | 5000_MPE | Pork, tenderloin, battered, fried                                                                                        | 31                 | 4                  | C           | 2             |
| 22704010 | 5000_MPE | Pork, cracklings, cooked                                                                                                 | 31                 | 0.5                | E           | 3             |
| 75418060 | 5000_MPE | Squash, summer, souffle                                                                                                  | 31                 | 3                  | C           | 2             |
| 23200120 | 5000_MPE | Veal, NS as to cut, cooked, lean only eaten                                                                              | 30                 | 4                  | B           | 1             |
| 22101500 | 5000_MPE | Pork chop, stewed, NS as to fat eaten                                                                                    | 30                 | 3.5                | C           | 1             |
| 22101510 | 5000_MPE | Pork chop, stewed, lean and fat eaten                                                                                    | 30                 | 3.5                | C           | 1             |
| 24208000 | 5000_MPE | Turkey, nuggets                                                                                                          | 30                 | 4                  | C           | 4             |
| 22201300 | 5000_MPE | Pork steak or cutlet, breaded or floured, broiled or baked, NS as to fat eaten                                           | 30                 | 2                  | D           | 2             |
| 22201310 | 5000_MPE | Pork steak or cutlet, breaded or floured, broiled or baked, lean and fat eaten                                           | 30                 | 2                  | D           | 2             |
| 23321200 | 5000_MPE | Venison/deer steak, cooked, NS as to cooking method                                                                      | 30                 | 4                  | B           | 2             |
| 32130270 | 5000_MPE | Egg omelet or scrambled egg, with meat, made without fat                                                                 | 30                 | 2                  | D           | 3             |
| 32101020 | 5000_MPE | Lamb chop, NS as to cut, cooked, lean only eaten                                                                         | 30                 | 4                  | C           | 1             |
| 23104020 | 5000_MPE | Lamb, loin chop, cooked, lean only eaten                                                                                 | 30                 | 4                  | C           | 1             |
| 32131070 | 5000_MPE | Egg omelet or scrambled egg, with cheese, meat, tomatoes, and dark-green vegetables, fat not added in cooking            | 30                 | 3                  | D           | 3             |
| 21001010 | 5000_MPE | Steak, NS as to type of meat, cooked, lean and fat eaten                                                                 | 30                 | 3.5                | D           | 1             |
| 23340100 | 5000_MPE | Armadillo, cooked                                                                                                        | 30                 | 4.5                | A           | 1             |
| 24152250 | 5000_MPE | Chicken thigh, baked or broiled, skin eaten, from fast food / restaurant                                                 | 30                 | 3.5                | D           | 4             |
| 32131100 | 5000_MPE | Egg omelet or scrambled egg, with cheese, meat, and vegetables other than dark-green and/or tomatoes, fat not added in c | 30                 | 3                  | D           | 3             |
| 14630200 | 5000_MPE | Cheese souffle                                                                                                           | 30                 | 2                  | D           | 2             |
| 24198737 | 5000_MPE | Chicken nuggets, from other sources                                                                                      | 30                 | 3                  | D           | 4             |
| 22000200 | 5000_MPE | Pork, NS as to cut, fried, NS as to fat eaten                                                                            | 30                 | 3.5                | C           | 1             |
| 22000210 | 5000_MPE | Pork, NS as to cut, fried, lean and fat eaten                                                                            | 30                 | 3.5                | C           | 1             |
| 22101200 | 5000_MPE | Pork chop, fried, NS as to fat eaten                                                                                     | 30                 | 3.5                | C           | 1             |
| 22101210 | 5000_MPE | Pork chop, fried, lean and fat eaten                                                                                     | 30                 | 3.5                | C           | 1             |
| 23322300 | 5000_MPE | Deer chop, cooked                                                                                                        | 30                 | 4                  | C           | 4             |
| 23110000 | 5000_MPE | Lamb, ribs, cooked, lean only eaten                                                                                      | 30                 | 3.5                | C           | 1             |
| 22706010 | 5000_MPE | Pork, neck bones, cooked                                                                                                 | 30                 | 3.5                | D           | 2             |
| 33401610 | 5000_MPE | Egg substitute, omelet, scrambled, or fried, with cheese, meat, and vegetables, fat not added in cooking                 | 30                 | 3                  | D           | 3             |
| 32131040 | 5000_MPE | Egg omelet or scrambled egg, with cheese, meat, and dark-green vegetables, fat not added in cooking                      | 30                 | 2                  | D           | 3             |
| 21103130 | 5000_MPE | Beef steak, breaded or floured, baked or fried, lean only eaten                                                          | 29                 | 3.5                | C           | 3             |
| 21103110 | 5000_MPE | Beef steak, breaded or floured, baked or fried, NS as to fat eaten                                                       | 29                 | 3.5                | C           | 3             |
| 22201410 | 5000_MPE | Pork steak or cutlet, breaded or floured, fried, lean and fat eaten                                                      | 29                 | 2                  | D           | 2             |
| 31105020 | 5000_MPE | Egg, whole, fried with margarine                                                                                         | 29                 | 3                  | D           | 4             |
| 24168021 | 5000_MPE | Chicken "wings" with other sauces or seasoning, from other sources                                                       | 29                 | 1.5                | D           | 3             |
| 22201220 | 5000_MPE | Pork steak or cutlet, fried, lean only eaten                                                                             | 29                 | 4                  | C           | 1             |
| 21601010 | 5000_MPE | Beef, bacon, reduced sodium, cooked                                                                                      | 29                 | 0.5                | E           | 3             |
| 22600210 | 5000_MPE | Pork bacon, NS as to fresh, smoked or cured, reduced sodium, cooked                                                      | 29                 | 0.5                | E           | 3             |
| 21401120 | 5000_MPE | Beef, roast, roasted, lean only eaten                                                                                    | 29                 | 4                  | B           | 1             |
| 23220030 | 5000_MPE | Veal patty, breaded, cooked                                                                                              | 29                 | 3.5                | D           | 3             |
| 21410110 | 5000_MPE | Beef, stew meat, cooked, lean and fat eaten                                                                              | 29                 | 4                  | C           | 1             |
| 22701000 | 5000_MPE | Pork, spareribs, cooked, NS as to fat eaten                                                                              | 28                 | 1.5                | D           | 1             |
| 22701010 | 5000_MPE | Pork, spareribs, cooked, lean and fat eaten                                                                              | 28                 | 1.5                | D           | 1             |
| 23120120 | 5000_MPE | Lamb, roast, cooked, lean only eaten                                                                                     | 28                 | 4                  | C           | 1             |
| 32400200 | 5000_MPE | Egg white, omelet, scrambled, or fried, with meat, fat added in cooking                                                  | 28                 | 2                  | D           | 3             |
| 32400220 | 5000_MPE | Egg white, omelet, scrambled, or fried, with meat, NS as to fat added in cooking                                         | 28                 | 2                  | D           | 3             |
| 21417100 | 5000_MPE | Beef brisket, cooked, NS as to fat eaten                                                                                 | 28                 | 4                  | C           | 1             |
| 21417120 | 5000_MPE | Beef brisket, cooked, lean only eaten                                                                                    | 28                 | 4                  | C           | 1             |
| 32130240 | 5000_MPE | Egg omelet or scrambled egg, with meat, made with animal fat or meat drippings                                           | 28                 | 2                  | D           | 2             |
| 24157321 | 5000_MPE | Chicken thigh, fried, coated, skin / coating not eaten, from fast food                                                   | 28                 | 3.5                | C           | 4             |
| 22602010 | 5000_MPE | Pork bacon, smoked or cured, reduced sodium, cooked                                                                      | 28                 | 0.5                | E           | 3             |
| 22002000 | 5000_MPE | Pork, ground or patty, cooked                                                                                            | 28                 | 2                  | D           | 1             |
| 24107080 | 5000_MPE | Chicken, NS as to part, baked, coated, skin / coating eaten                                                              | 28                 | 2                  | D           | 4             |
| 23204010 | 5000_MPE | Veal cutlet or steak, NS as to cooking method, NS as to fat eaten                                                        | 28                 | 4                  | C           | 1             |
| 22411000 | 5000_MPE | Pork roast, shoulder, cooked, NS as to fat eaten                                                                         | 28                 | 2                  | D           | 1             |
| 22411010 | 5000_MPE | Pork roast, shoulder, cooked, lean and fat eaten                                                                         | 28                 | 2                  | D           | 1             |
| 24152240 | 5000_MPE | Chicken thigh, baked or broiled, skin eaten, from pre-cooked                                                             | 28                 | 4                  | C           | 4             |
| 33401300 | 5000_MPE | Egg substitute, omelet, scrambled, or fried, with cheese and meat, fat added in cooking                                  | 28                 | 2                  | D           | 3             |
| 33401320 | 5000_MPE | Egg substitute, omelet, scrambled, or fried, with cheese and meat, NS as to fat added in cooking                         | 28                 | 2                  | D           | 3             |
| 32130300 | 5000_MPE | Egg omelet or scrambled egg, with cheese and meat, made with margarine                                                   | 28                 | 2                  | D           | 3             |
| 24198440 | 5000_MPE | Chicken skin                                                                                                             | 28                 | 1.5                | E           | 1             |
| 24168012 | 5000_MPE | Chicken "wings", plain, from precooked                                                                                   | 28                 | 3                  | D           | 4             |
| 24162150 | 5000_MPE | Chicken wing, baked or broiled, from fast food / restaurant                                                              | 28                 | 2                  | D           | 4             |

| foodcode  | level1nd | Description                                                                                         | Food Compass Score | Health Star Rating | Nutri-Score | NOVA Category |
|-----------|----------|-----------------------------------------------------------------------------------------------------|--------------------|--------------------|-------------|---------------|
| 32130290  | 5000_MPE | Egg omelet or scrambled egg, with cheese and meat, NS as to fat added in cooking                    | 28                 | 2                  | D           | 3             |
| 32130365  | 5000_MPE | Egg omelet or scrambled egg, with cheese and meat, NS as to type of fat                             | 28                 | 2                  | D           | 3             |
| 31108110  | 5000_MPE | Egg, white, cooked, fat not added in cooking                                                        | 28                 | 4                  | B           | 1             |
| 24157330  | 5000_MPE | Chicken thigh, fried, coated, skin / coating eaten, from restaurant                                 | 28                 | 2                  | D           | 3             |
| 24167230  | 5000_MPE | Chicken wing, fried, coated, from restaurant                                                        | 28                 | 1.5                | D           | 3             |
| 31105040  | 5000_MPE | Egg, whole, fried with butter                                                                       | 28                 | 2                  | D           | 2             |
| 24147310  | 5000_MPE | Chicken drumstick, fried, coated, skin / coating eaten, from pre-cooked                             | 27                 | 3.5                | D           | 4             |
| 21105110  | 5000_MPE | Beef steak, braised, NS as to fat eaten                                                             | 27                 | 3.5                | D           | 1             |
| 21105120  | 5000_MPE | Beef steak, braised, lean and fat eaten                                                             | 27                 | 3.5                | D           | 1             |
| 21301000  | 5000_MPE | Beef, oxtails, cooked                                                                               | 27                 | 3.5                | D           | 1             |
| 21407000  | 5000_MPE | Beef, pot roast, braised or boiled, NS as to fat eaten                                              | 27                 | 3.5                | D           | 1             |
| 21407120  | 5000_MPE | Beef, pot roast, braised or boiled, lean only eaten                                                 | 27                 | 3.5                | D           | 1             |
| 21410000  | 5000_MPE | Beef, stew meat, cooked, NS as to fat eaten                                                         | 27                 | 3.5                | D           | 1             |
| 21410120  | 5000_MPE | Beef, stew meat, cooked, lean only eaten                                                            | 27                 | 3.5                | D           | 1             |
| 23132000  | 5000_MPE | Lamb, ground or patty, cooked                                                                       | 27                 | 2                  | D           | 1             |
| 24208500  | 5000_MPE | Turkey bacon, cooked                                                                                | 27                 | 0.5                | E           | 3             |
| 23107020  | 5000_MPE | Lamb, shoulder chop, cooked, lean only eaten                                                        | 27                 | 3.5                | C           | 1             |
| 23204020  | 5000_MPE | Veal cutlet or steak, NS as to cooking method, lean and fat eaten                                   | 27                 | 4                  | C           | 1             |
| 21304000  | 5000_MPE | Beef, shortribs, cooked, NS as to fat eaten                                                         | 27                 | 2                  | D           | 1             |
| 21304120  | 5000_MPE | Beef, shortribs, cooked, lean only eaten                                                            | 27                 | 2                  | D           | 1             |
| 33001020  | 5000_MPE | Egg substitute, omelet, scrambled, or fried, made with butter                                       | 27                 | 3                  | C           | 2             |
| 22201070  | 5000_MPE | Pork steak or cutlet, battered, fried, lean only eaten                                              | 27                 | 3.5                | C           | 2             |
| 21305000  | 5000_MPE | Beef, cow head, cooked                                                                              | 27                 | 2                  | D           | 1             |
| 27246400  | 5000_MPE | Chicken or turkey souffle                                                                           | 27                 | 3                  | D           | 1             |
| 21103120  | 5000_MPE | Beef steak, breaded or floured, baked or fried, lean and fat eaten                                  | 27                 | 3.5                | D           | 3             |
| 21003000  | 5000_MPE | Beef, NS as to cut, fried, NS to fat eaten                                                          | 27                 | 4                  | C           | 1             |
| 21102110  | 5000_MPE | Beef steak, fried, NS as to fat eaten                                                               | 27                 | 4                  | C           | 1             |
| 21102130  | 5000_MPE | Beef steak, fried, lean only eaten                                                                  | 27                 | 4                  | C           | 1             |
| 23200100  | 5000_MPE | Veal, NS as to cut, cooked, NS as to fat eaten                                                      | 26                 | 4                  | C           | 1             |
| 23200110  | 5000_MPE | Veal, NS as to cut, cooked, lean and fat eaten                                                      | 26                 | 4                  | C           | 1             |
| 23210010  | 5000_MPE | Veal, roasted, NS as to fat eaten                                                                   | 26                 | 4                  | C           | 1             |
| 23210020  | 5000_MPE | Veal, roasted, lean and fat eaten                                                                   | 26                 | 4                  | C           | 1             |
| 22701050  | 5000_MPE | Pork, spareribs, barbecued, with sauce, lean only eaten                                             | 26                 | 3.5                | D           | 2             |
| 32130360  | 5000_MPE | Egg omelet or scrambled egg, with cheese and meat, made with cooking spray                          | 26                 | 2                  | D           | 3             |
| 21500310  | 5000_MPE | Ground beef patty, cooked                                                                           | 26                 | 2                  | D           | 1             |
| 20000200  | 5000_MPE | Ground meat, NFS                                                                                    | 26                 | 2                  | D           | 1             |
| 21500100  | 5000_MPE | Ground beef, cooked                                                                                 | 26                 | 2                  | D           | 1             |
| 21302000  | 5000_MPE | Beef, neck bones, cooked                                                                            | 26                 | 2                  | D           | 1             |
| 23101000  | 5000_MPE | Lamb chop, NS as to cut, cooked, NS as to fat eaten                                                 | 26                 | 1.5                | D           | 1             |
| 23101010  | 5000_MPE | Lamb chop, NS as to cut, cooked, lean and fat eaten                                                 | 26                 | 1.5                | D           | 1             |
| 23104000  | 5000_MPE | Lamb, loin chop, cooked, NS as to fat eaten                                                         | 26                 | 1.5                | D           | 1             |
| 23104010  | 5000_MPE | Lamb, loin chop, cooked, lean and fat eaten                                                         | 26                 | 1.5                | D           | 1             |
| 22201400  | 5000_MPE | Pork steak or cutlet, breaded or floured, fried, NS as to fat eaten                                 | 26                 | 2                  | D           | 2             |
| 23000100  | 5000_MPE | Lamb, NS as to cut, cooked                                                                          | 26                 | 2                  | D           | 1             |
| 32130370  | 5000_MPE | Egg omelet or scrambled egg, with cheese and meat, made without fat                                 | 26                 | 2                  | D           | 3             |
| 22201200  | 5000_MPE | Pork steak or cutlet, fried, NS as to fat eaten                                                     | 26                 | 3.5                | D           | 1             |
| 22201210  | 5000_MPE | Pork steak or cutlet, fried, lean and fat eaten                                                     | 26                 | 3.5                | D           | 1             |
| 23203030  | 5000_MPE | Veal chop, fried, lean only eaten                                                                   | 26                 | 4                  | C           | 1             |
| 22300140  | 5000_MPE | Ham, fried, lean only eaten                                                                         | 26                 | 1.5                | D           | 3             |
| 23120100  | 5000_MPE | Lamb, roast, cooked, NS as to fat eaten                                                             | 26                 | 2                  | D           | 1             |
| 23120110  | 5000_MPE | Lamb, roast, cooked, lean and fat eaten                                                             | 26                 | 2                  | D           | 1             |
| 23111010  | 5000_MPE | Lamb hocks, cooked                                                                                  | 26                 | 3.5                | D           | 1             |
| 22501010  | 5000_MPE | Canadian bacon, cooked                                                                              | 26                 | 2                  | D           | 3             |
| 21417110  | 5000_MPE | Beef brisket, cooked, lean and fat eaten                                                            | 26                 | 2                  | D           | 1             |
| 24127220  | 5000_MPE | Chicken breast, fried, coated, skin / coating eaten, from fast food / restaurant                    | 26                 | 3                  | D           | 4             |
| 23205030  | 5000_MPE | Veal cutlet or steak, fried, lean only eaten                                                        | 25                 | 4                  | B           | 1             |
| 22101520  | 5000_MPE | Pork chop, stewed, lean only eaten                                                                  | 25                 | 4                  | C           | 1             |
| 22101420  | 5000_MPE | Pork chop, battered, fried, lean only eaten                                                         | 25                 | 3.5                | C           | 2             |
| 22300120  | 5000_MPE | Ham, fried, NS as to fat eaten                                                                      | 25                 | 1.5                | D           | 3             |
| 22300130  | 5000_MPE | Ham, fried, lean and fat eaten                                                                      | 25                 | 1.5                | D           | 3             |
| 24168020  | 5000_MPE | Chicken "wings" with hot sauce, from other sources                                                  | 25                 | 1.5                | D           | 3             |
| 32400710  | 5000_MPE | Egg white, omelet, scrambled, or fried, with cheese, meat, and vegetables, fat not added in cooking | 25                 | 3.5                | C           | 3             |
| 23107000  | 5000_MPE | Lamb, shoulder chop, cooked, NS as to fat eaten                                                     | 25                 | 2                  | D           | 1             |
| 23107010  | 5000_MPE | Lamb, shoulder chop, cooked, lean and fat eaten                                                     | 25                 | 2                  | D           | 1             |
| 32400110  | 5000_MPE | Egg white, omelet, scrambled, or fried, with cheese, fat not added in cooking                       | 25                 | 3.5                | C           | 3             |
| 32130340  | 5000_MPE | Egg omelet or scrambled egg, with cheese and meat, made with animal fat or meat drippings           | 25                 | 1.5                | D           | 2             |
| 23110010  | 5000_MPE | Lamb, ribs, cooked, NS as to fat eaten                                                              | 25                 | 1.5                | D           | 1             |
| 23110050  | 5000_MPE | Lamb, ribs, cooked, lean and fat eaten                                                              | 25                 | 1.5                | D           | 1             |
| 24157310  | 5000_MPE | Chicken thigh, fried, coated, skin / coating eaten, from pre-cooked                                 | 25                 | 3                  | D           | 4             |
| 21102120  | 5000_MPE | Beef steak, fried, lean and fat eaten                                                               | 25                 | 3.5                | D           | 1             |
| 22101400  | 5000_MPE | Pork chop, battered, fried, NS as to fat eaten                                                      | 25                 | 3.5                | D           | 2             |
| 22101410  | 5000_MPE | Pork chop, battered, fried, lean and fat eaten                                                      | 25                 | 3.5                | D           | 2             |
| 22000220  | 5000_MPE | Pork, NS as to cut, fried, lean only eaten                                                          | 25                 | 4                  | C           | 1             |
| 22101220  | 5000_MPE | Pork chop, fried, lean only eaten                                                                   | 25                 | 4                  | C           | 1             |
| 24162140  | 5000_MPE | Chicken wing, baked or broiled, from pre-cooked                                                     | 25                 | 2                  | D           | 4             |
| 22600100  | 5000_MPE | Bacon, NS as to type of meat, cooked                                                                | 24                 | 0.5                | E           | 3             |
| 22600200  | 5000_MPE | Pork bacon, NS as to fresh, smoked or cured, cooked                                                 | 24                 | 0.5                | E           | 3             |
| 22601000  | 5000_MPE | Pork bacon, smoked or cured, cooked                                                                 | 24                 | 0.5                | E           | 3             |
| 22601040  | 5000_MPE | Bacon or side pork, fresh, cooked                                                                   | 24                 | 0.5                | E           | 3             |
| 25160130  | 5000_MPE | Tongue pot roast, Puerto Rican style                                                                | 24                 | 1                  | E           | 1             |
| 25160110  | 5000_MPE | Tongue, smoked, cured, or pickled, cooked                                                           | 24                 | 1                  | E           | 1             |
| 22300170  | 5000_MPE | Ham, breaded or floured, fried, lean only eaten                                                     | 24                 | 1.5                | D           | 3             |
| 32130220  | 5000_MPE | Egg omelet or scrambled egg, with meat, made with butter                                            | 24                 | 2                  | D           | 3             |
| 32400400  | 5000_MPE | Egg white, omelet, scrambled, or fried, with cheese and meat, fat added in cooking                  | 24                 | 2                  | D           | 3             |
| 32400420  | 5000_MPE | Egg white, omelet, scrambled, or fried, with cheese and meat, NS as to fat added in cooking         | 24                 | 2                  | D           | 3             |
| 32400610  | 5000_MPE | Egg white, omelet, scrambled, or fried, with meat and vegetables, fat not added in cooking          | 24                 | 3.5                | C           | 3             |
| 23203010  | 5000_MPE | Veal chop, fried, NS as to fat eaten                                                                | 24                 | 3.5                | C           | 1             |
| 23203020  | 5000_MPE | Veal chop, fried, lean and fat eaten                                                                | 24                 | 3.5                | C           | 1             |
| 23205010  | 5000_MPE | Veal cutlet or steak, fried, NS as to fat eaten                                                     | 24                 | 3.5                | C           | 1             |
| 23205020  | 5000_MPE | Veal cutlet or steak, fried, lean and fat eaten                                                     | 24                 | 3.5                | C           | 1             |
| 24168002  | 5000_MPE | Chicken "wings", plain, from fast food / restaurant                                                 | 24                 | 1.5                | D           | 4             |
| 22201050  | 5000_MPE | Pork steak or cutlet, battered, fried, NS as to fat eaten                                           | 24                 | 3                  | D           | 2             |
| 22201060  | 5000_MPE | Pork steak or cutlet, battered, fried, lean and fat eaten                                           | 24                 | 3                  | D           | 2             |
| 24198736  | 5000_MPE | Chicken nuggets, from frozen                                                                        | 23                 | 3                  | C           | 4             |
| 23220010  | 5000_MPE | Veal, ground or patty, cooked                                                                       | 23                 | 4                  | C           | 1             |
| 23201030  | 5000_MPE | Veal chop, NS as to cooking method, lean only eaten                                                 | 23                 | 4                  | C           | 1             |
| 23203120  | 5000_MPE | Veal chop, broiled, lean only eaten                                                                 | 23                 | 4                  | C           | 1             |
| 23210030  | 5000_MPE | Veal, roasted, lean only eaten                                                                      | 23                 | 4                  | C           | 1             |
| 232105190 | 5000_MPE | Egg casserole with bread, cheese, milk and meat                                                     | 23                 | 3                  | D           | 2             |
| 25170310  | 5000_MPE | Hog maws, cooked                                                                                    | 23                 | 2                  | D           | 1             |
| 23204200  | 5000_MPE | Veal cutlet or steak, broiled, NS as to fat eaten                                                   | 23                 | 4                  | B           | 1             |
| 23204210  | 5000_MPE | Veal cutlet or steak, broiled, lean and fat eaten                                                   | 23                 | 4                  | B           | 1             |

| foodcode | level1nd | Description                                                                                                   | Food Compass Score | Health Star Rating | Nutri-Score | NOVA Category |
|----------|----------|---------------------------------------------------------------------------------------------------------------|--------------------|--------------------|-------------|---------------|
| 21304110 | 5000_MPE | Beef, shortribs, cooked, lean and fat eaten                                                                   | 23                 | 1                  | E           | 1             |
| 21105130 | 5000_MPE | Beef steak, braised, lean only eaten                                                                          | 23                 | 4                  | C           | 1             |
| 22300150 | 5000_MPE | Ham, breaded or floured, fried, NS as to fat eaten                                                            | 23                 | 2                  | D           | 3             |
| 22300160 | 5000_MPE | Ham, breaded or floured, fried, lean and fat eaten                                                            | 23                 | 2                  | D           | 3             |
| 22311520 | 5000_MPE | Ham, smoked or cured, canned, lean only eaten                                                                 | 22                 | 2                  | D           | 3             |
| 22701030 | 5000_MPE | Pork, spareribs, barbecued, with sauce, NS as to fat eaten                                                    | 22                 | 1.5                | D           | 2             |
| 22701040 | 5000_MPE | Pork, spareribs, barbecued, with sauce, lean and fat eaten                                                    | 22                 | 1.5                | D           | 2             |
| 21407110 | 5000_MPE | Beef, pot roast, braised or boiled, lean and fat eaten                                                        | 22                 | 4                  | B           | 1             |
| 21304220 | 5000_MPE | Beef, shortribs, barbecued, with sauce, lean only eaten                                                       | 22                 | 2                  | D           | 2             |
| 24147320 | 5000_MPE | Chicken drumstick, fried, coated, skin / coating eaten, from fast food / restaurant                           | 22                 | 2                  | D           | 4             |
| 23201010 | 5000_MPE | Veal chop, NS as to cooking method, NS as to fat eaten                                                        | 22                 | 3.5                | D           | 1             |
| 23201020 | 5000_MPE | Veal chop, NS as to cooking method, lean and fat eaten                                                        | 22                 | 3.5                | D           | 1             |
| 23203100 | 5000_MPE | Veal chop, broiled, NS as to fat eaten                                                                        | 22                 | 3.5                | D           | 1             |
| 23203110 | 5000_MPE | Veal chop, broiled, lean and fat eaten                                                                        | 22                 | 3.5                | D           | 1             |
| 32130320 | 5000_MPE | Egg omelet or scrambled egg, with cheese and meat, made with butter                                           | 22                 | 1.5                | D           | 3             |
| 24198840 | 5000_MPE | Fried chicken chunks, Puerto Rican style                                                                      | 22                 | 2                  | D           | 2             |
| 24107070 | 5000_MPE | Chicken, NS as to part, fried, coated, skin / coating eaten                                                   | 22                 | 2                  | D           | 4             |
| 25230560 | 5000_MPE | Liverwurst                                                                                                    | 21                 | 1                  | E           | 4             |
| 23220020 | 5000_MPE | Mock chicken legs, cooked                                                                                     | 21                 | 3.5                | D           | 3             |
| 22107020 | 5000_MPE | Pork chop, smoked or cured, cooked, lean only eaten                                                           | 21                 | 1.5                | D           | 3             |
| 25240110 | 5000_MPE | Chicken salad spread                                                                                          | 21                 | 3                  | D           | 4             |
| 32400080 | 5000_MPE | Egg white omelet, scrambled, or fried, made without fat                                                       | 21                 | 4                  | B           | 1             |
| 24167210 | 5000_MPE | Chicken wing, fried, coated, from pre-cooked                                                                  | 21                 | 3                  | D           | 4             |
| 21104110 | 5000_MPE | Beef steak, battered, fried, NS as to fat eaten                                                               | 21                 | 4                  | C           | 3             |
| 24168030 | 5000_MPE | Chicken "wings", boneless, with hot sauce, from fast food / restaurant                                        | 21                 | 1.5                | D           | 4             |
| 22421000 | 5000_MPE | Pork roast, smoked or cured, cooked, NS as to fat eaten                                                       | 21                 | 1.5                | D           | 3             |
| 22421010 | 5000_MPE | Pork roast, smoked or cured, cooked, lean and fat eaten                                                       | 21                 | 1.5                | D           | 3             |
| 22311500 | 5000_MPE | Ham, smoked or cured, canned, NS as to fat eaten                                                              | 20                 | 2                  | D           | 3             |
| 22311510 | 5000_MPE | Ham, smoked or cured, canned, lean and fat eaten                                                              | 20                 | 2                  | D           | 3             |
| 22709110 | 5000_MPE | Pork skin, boiled                                                                                             | 20                 | 0.5                | E           | 1             |
| 23345100 | 5000_MPE | Wild pig, smoked                                                                                              | 20                 | 3.5                | C           | 1             |
| 33401310 | 5000_MPE | Egg substitute, omelet, scrambled, or fried, with cheese and meat, fat not added in cooking                   | 20                 | 2                  | D           | 3             |
| 22311000 | 5000_MPE | Ham, smoked or cured, cooked, NS as to fat eaten                                                              | 20                 | 1.5                | D           | 3             |
| 22311010 | 5000_MPE | Ham, smoked or cured, cooked, lean and fat eaten                                                              | 20                 | 1.5                | D           | 3             |
| 21304200 | 5000_MPE | Beef, shortribs, barbecued, with sauce, NS as to fat eaten                                                    | 20                 | 1                  | E           | 2             |
| 21304210 | 5000_MPE | Beef, shortribs, barbecued, with sauce, lean and fat eaten                                                    | 20                 | 1                  | E           | 2             |
| 22311020 | 5000_MPE | Ham, smoked or cured, cooked, lean only eaten                                                                 | 20                 | 1.5                | D           | 3             |
| 24168011 | 5000_MPE | Chicken "wings" with other sauces or seasoning, from precooked                                                | 20                 | 2                  | D           | 4             |
| 32400210 | 5000_MPE | Egg white, omelet, scrambled, or fried, with meat, fat not added in cooking                                   | 20                 | 2                  | D           | 3             |
| 32101500 | 5000_MPE | Egg, Benedict                                                                                                 | 19                 | 1.5                | D           | 3             |
| 22311450 | 5000_MPE | Ham, prosciutto                                                                                               | 19                 | 0.5                | D           | 3             |
| 24168001 | 5000_MPE | Chicken "wings" with other sauces or seasoning, from fast food / restaurant                                   | 19                 | 1.5                | D           | 4             |
| 22421020 | 5000_MPE | Pork roast, smoked or cured, cooked, lean only eaten                                                          | 19                 | 1.5                | D           | 3             |
| 21104130 | 5000_MPE | Beef steak, battered, fried, lean only eaten                                                                  | 19                 | 3.5                | C           | 3             |
| 22107000 | 5000_MPE | Pork chop, smoked or cured, cooked, NS as to fat eaten                                                        | 18                 | 1                  | E           | 3             |
| 22107010 | 5000_MPE | Pork chop, smoked or cured, cooked, lean and fat eaten                                                        | 18                 | 1                  | E           | 3             |
| 24201510 | 5000_MPE | Turkey, light or dark meat, smoked, skin eaten                                                                | 18                 | 2                  | D           | 3             |
| 25230220 | 5000_MPE | Ham, prepackaged or deli, luncheon meat, reduced sodium                                                       | 18                 | 3.5                | C           | 4             |
| 24202120 | 5000_MPE | Turkey, drumstick, smoked, skin eaten                                                                         | 18                 | 1.5                | D           | 3             |
| 24203120 | 5000_MPE | Turkey, wing, smoked, skin eaten                                                                              | 18                 | 1.5                | D           | 3             |
| 23321050 | 5000_MPE | Venison/deer, cured                                                                                           | 17                 | 1.5                | D           | 2             |
| 21104120 | 5000_MPE | Beef steak, battered, fried, lean and fat eaten                                                               | 17                 | 3.5                | D           | 3             |
| 22709010 | 5000_MPE | Pork skin rinds                                                                                               | 17                 | 0.5                | E           | 3             |
| 24157320 | 5000_MPE | Chicken thigh, fried, coated, skin / coating eaten, from fast food                                            | 17                 | 2                  | D           | 4             |
| 25231120 | 5000_MPE | Beef, prepackaged or deli, luncheon meat, reduced sodium                                                      | 17                 | 3.5                | C           | 4             |
| 24167220 | 5000_MPE | Chicken wing, fried, coated, from fast food                                                                   | 17                 | 1.5                | D           | 4             |
| 24208510 | 5000_MPE | Turkey bacon, reduced sodium, cooked                                                                          | 16                 | 1.5                | D           | 3             |
| 25230110 | 5000_MPE | Luncheon meat, NFS                                                                                            | 16                 | 3                  | D           | 4             |
| 25230210 | 5000_MPE | Ham, prepackaged or deli, luncheon meat                                                                       | 16                 | 3                  | D           | 4             |
| 32400410 | 5000_MPE | Egg white, omelet, scrambled, or fried, with cheese and meat, fat not added in cooking                        | 16                 | 2                  | D           | 3             |
| 25221406 | 5000_MPE | Pork sausage, reduced fat                                                                                     | 15                 | 1.5                | D           | 4             |
| 25221220 | 5000_MPE | Pastrami, made from any kind of meat, reduced fat                                                             | 15                 | 3.5                | D           | 4             |
| 25231110 | 5000_MPE | Beef, prepackaged or deli, luncheon meat                                                                      | 15                 | 3.5                | D           | 4             |
| 25220106 | 5000_MPE | Beef sausage, reduced fat                                                                                     | 15                 | 1.5                | D           | 4             |
| 24168010 | 5000_MPE | Chicken "wings" with hot sauce, from precooked                                                                | 15                 | 1.5                | D           | 4             |
| 21601000 | 5000_MPE | Beef, bacon, cooked                                                                                           | 15                 | 0.5                | E           | 3             |
| 24201520 | 5000_MPE | Turkey, light or dark meat, smoked, skin not eaten                                                            | 15                 | 2                  | D           | 3             |
| 24168000 | 5000_MPE | Chicken "wings" with hot sauce, from fast food / restaurant                                                   | 14                 | 1.5                | D           | 4             |
| 32400070 | 5000_MPE | Egg white omelet, scrambled, or fried, made with butter                                                       | 14                 | 3                  | C           | 2             |
| 23311120 | 5000_MPE | Rabbit, NS as to domestic or wild, breaded, fried                                                             | 14                 | 4                  | C           | 4             |
| 33401110 | 5000_MPE | Egg substitute, omelet, scrambled, or fried, with meat, fat not added in cooking                              | 14                 | 3                  | D           | 4             |
| 25170210 | 5000_MPE | Chitterlings, cooked                                                                                          | 14                 | 2                  | D           | 1             |
| 25221350 | 5000_MPE | Italian sausage                                                                                               | 13                 | 1                  | E           | 4             |
| 25230785 | 5000_MPE | Turkey, prepackaged or deli, luncheon meat, reduced sodium                                                    | 13                 | 3.5                | C           | 4             |
| 21002000 | 5000_MPE | Beef, pickled                                                                                                 | 13                 | 1.5                | E           | 3             |
| 21416000 | 5000_MPE | Corned beef, cooked, NS as to fat eaten                                                                       | 13                 | 1.5                | E           | 3             |
| 21416110 | 5000_MPE | Corned beef, cooked, lean and fat eaten                                                                       | 13                 | 1.5                | E           | 3             |
| 25230780 | 5000_MPE | Turkey, prepackaged or deli, luncheon meat                                                                    | 11                 | 3.5                | C           | 4             |
| 25221870 | 5000_MPE | Turkey or chicken and pork sausage                                                                            | 11                 | 1.5                | E           | 4             |
| 25220350 | 5000_MPE | Bratwurst                                                                                                     | 11                 | 1                  | E           | 4             |
| 21602010 | 5000_MPE | Beef, dried, chipped, cooked in fat                                                                           | 10                 | 0.5                | D           | 2             |
| 25240220 | 5000_MPE | Ham salad spread                                                                                              | 10                 | 1.5                | D           | 4             |
| 25220710 | 5000_MPE | Chorizo                                                                                                       | 9                  | 0.5                | E           | 4             |
| 25221505 | 5000_MPE | Salami, made from any type of meat, reduced fat                                                               | 9                  | 1.5                | D           | 4             |
| 25220360 | 5000_MPE | Bratwurst, with cheese                                                                                        | 9                  | 1                  | E           | 4             |
| 21602100 | 5000_MPE | Beef jerky                                                                                                    | 9                  | 0.5                | E           | 4             |
| 22002800 | 5000_MPE | Pork jerky                                                                                                    | 9                  | 0.5                | E           | 4             |
| 22321110 | 5000_MPE | Ham, smoked or cured, ground patty                                                                            | 8                  | 1                  | E           | 4             |
| 25221400 | 5000_MPE | Sausage, NFS                                                                                                  | 8                  | 1                  | E           | 4             |
| 25221405 | 5000_MPE | Pork sausage                                                                                                  | 8                  | 1                  | E           | 4             |
| 22707010 | 5000_MPE | Pork, pig's feet, cooked                                                                                      | 8                  | 3.5                | C           | 1             |
| 25230550 | 5000_MPE | Ham, pork, and chicken, canned luncheon meat, chopped, minced, pressed, spiced, reduced sodium                | 8                  | 1                  | E           | 4             |
| 21416120 | 5000_MPE | Corned beef, cooked, lean only eaten                                                                          | 8                  | 1.5                | D           | 3             |
| 21416150 | 5000_MPE | Corned beef, canned, ready-to-eat                                                                             | 8                  | 1.5                | D           | 3             |
| 25221515 | 5000_MPE | Salami, made from any type of meat, reduced sodium                                                            | 8                  | 0.5                | E           | 4             |
| 22621000 | 5000_MPE | Salt pork, cooked                                                                                             | 7                  | 0.5                | E           | 3             |
| 23321900 | 5000_MPE | Venison/deer jerky                                                                                            | 7                  | 0.5                | E           | 2             |
| 25230610 | 5000_MPE | Luncheon meat, loaf type                                                                                      | 6                  | 1.5                | D           | 4             |
| 25230800 | 5000_MPE | Turkey ham, prepackaged or deli, luncheon meat                                                                | 6                  | 2                  | D           | 4             |
| 25230540 | 5000_MPE | Ham, pork and chicken, canned luncheon meat, chopped, minced, pressed, spiced, reduced fat and reduced sodium | 6                  | 1.5                | D           | 4             |
| 22600110 | 5000_MPE | Bacon, NS as to type of meat, reduced sodium, cooked                                                          | 6                  | 1.5                | D           | 4             |
| 25221450 | 5000_MPE | Pork sausage rice links                                                                                       | 6                  | 1                  | E           | 4             |

| foodcode | level1nd | Description                                                          | Food Compass Score | Health Star Rating | Nutri-Score | NOVA Category |
|----------|----------|----------------------------------------------------------------------|--------------------|--------------------|-------------|---------------|
| 25221830 | 5000_MPE | Turkey or chicken sausage                                            | 6                  | 3                  | D           | 4             |
| 25221860 | 5000_MPE | Turkey or chicken sausage, reduced fat                               | 6                  | 3                  | D           | 4             |
| 25221610 | 5000_MPE | Scrapple, cooked                                                     | 5                  | 3                  | D           | 4             |
| 25221255 | 5000_MPE | Pepperoni, reduced fat                                               | 5                  | 0.5                | E           | 4             |
| 25221500 | 5000_MPE | Salami, NFS                                                          | 5                  | 0.5                | E           | 4             |
| 25230420 | 5000_MPE | Ham luncheon meat, loaf type                                         | 5                  | 1.5                | D           | 4             |
| 25210410 | 5000_MPE | Frankfurter or hot dog, turkey                                       | 4                  | 1.5                | D           | 4             |
| 25210250 | 5000_MPE | Frankfurter or hot dog, meat and poultry, fat free                   | 4                  | 3                  | C           | 4             |
| 25230340 | 5000_MPE | Chicken, prepackaged or deli, luncheon meat, reduced sodium          | 4                  | 3.5                | C           | 4             |
| 22431000 | 5000_MPE | Pork roll, cured, fried                                              | 4                  | 0.5                | E           | 3             |
| 25221260 | 5000_MPE | Pepperoni, reduced sodium                                            | 3                  | 0.5                | E           | 4             |
| 25210290 | 5000_MPE | Frankfurter or hot dog, meat and poultry, reduced fat or light       | 3                  | 3                  | D           | 4             |
| 25210620 | 5000_MPE | Frankfurter or hot dog, beef, reduced fat or light                   | 3                  | 3                  | D           | 4             |
| 25210750 | 5000_MPE | Frankfurter or hot dog, reduced fat or light, NFS                    | 3                  | 3                  | D           | 4             |
| 25230320 | 5000_MPE | Chicken, prepackaged or deli, luncheon meat                          | 3                  | 3                  | D           | 4             |
| 25240000 | 5000_MPE | Meat spread or potted meat, NFS                                      | 2                  | 1.5                | D           | 4             |
| 25221310 | 5000_MPE | Polish sausage                                                       | 2                  | 1                  | E           | 4             |
| 25210150 | 5000_MPE | Frankfurter or hot dog, cheese-filled                                | 2                  | 0.5                | E           | 4             |
| 25210220 | 5000_MPE | Frankfurter or hot dog, beef and pork                                | 1                  | 1.5                | E           | 4             |
| 25210240 | 5000_MPE | Frankfurter or hot dog, beef and pork, reduced fat or light          | 1                  | 1.5                | E           | 4             |
| 25210280 | 5000_MPE | Frankfurter or hot dog, meat and poultry                             | 1                  | 1.5                | E           | 4             |
| 25221810 | 5000_MPE | Thuringer                                                            | 1                  | 0.5                | E           | 4             |
| 21602000 | 5000_MPE | Beef, dried, chipped, uncooked                                       | 1                  | 0.5                | D           | 3             |
| 22001000 | 5000_MPE | Pork, pickled, NS as to cut                                          | 1                  | 2                  | D           | 3             |
| 22707020 | 5000_MPE | Pork, pig's feet, pickled                                            | 1                  | 2                  | D           | 3             |
| 23221100 | 5000_MPE | Deer sausage                                                         | 1                  | 1                  | E           | 4             |
| 25210110 | 5000_MPE | Frankfurter, wiener, or hot dog, NFS                                 | 1                  | 1                  | E           | 4             |
| 25210210 | 5000_MPE | Frankfurter or hot dog, beef                                         | 1                  | 1                  | E           | 4             |
| 25210310 | 5000_MPE | Frankfurter or hot dog, chicken                                      | 1                  | 1.5                | D           | 4             |
| 25220105 | 5000_MPE | Beef sausage                                                         | 1                  | 0.5                | E           | 4             |
| 25220108 | 5000_MPE | Beef sausage, reduced sodium                                         | 1                  | 2                  | D           | 4             |
| 25220150 | 5000_MPE | Beef sausage with cheese                                             | 1                  | 0.5                | E           | 4             |
| 25220210 | 5000_MPE | Blood sausage                                                        | 1                  | 1                  | E           | 4             |
| 25220410 | 5000_MPE | Bologna, NFS                                                         | 1                  | 0.5                | E           | 4             |
| 25220425 | 5000_MPE | Bologna, made from any kind of meat, reduced fat                     | 1                  | 1.5                | D           | 4             |
| 25220435 | 5000_MPE | Bologna, made from any kind of meat, reduced sodium                  | 1                  | 1                  | E           | 4             |
| 25220445 | 5000_MPE | Bologna, made from any kind of meat, reduced fat and reduced sodium  | 1                  | 1.5                | D           | 4             |
| 25220650 | 5000_MPE | Turkey or chicken and beef sausage                                   | 1                  | 1.5                | D           | 4             |
| 25220910 | 5000_MPE | Head cheese                                                          | 1                  | 2                  | D           | 4             |
| 25221110 | 5000_MPE | Knockwurst                                                           | 1                  | 1                  | E           | 4             |
| 25221210 | 5000_MPE | Mortadella                                                           | 1                  | 0.5                | E           | 4             |
| 25221215 | 5000_MPE | Pastrami, NFS                                                        | 1                  | 2                  | D           | 4             |
| 25221250 | 5000_MPE | Pepperoni, NFS                                                       | 1                  | 0.5                | E           | 4             |
| 25221408 | 5000_MPE | Pork sausage, reduced sodium                                         | 1                  | 2                  | D           | 4             |
| 25221460 | 5000_MPE | Pork and beef sausage                                                | 1                  | 0.5                | E           | 4             |
| 25221875 | 5000_MPE | Turkey or chicken, pork, and beef sausage, reduced sodium            | 1                  | 2                  | D           | 4             |
| 25221910 | 5000_MPE | Vienna sausage, canned                                               | 1                  | 1.5                | D           | 4             |
| 25221950 | 5000_MPE | Pickled sausage                                                      | 1                  | 0.5                | E           | 4             |
| 25230530 | 5000_MPE | Ham and pork, canned luncheon meat, chopped, minced, pressed, spiced | 1                  | 0.5                | E           | 4             |



| foodcode | level1nd     | Description                                                    | Food Compass Score | Health Star Rating | Nutri-Score | NOVA Category |
|----------|--------------|----------------------------------------------------------------|--------------------|--------------------|-------------|---------------|
| 26118000 | 5800_Seafood | Halibut, raw                                                   | 100                | 4.5                | A           | 1             |
| 26118010 | 5800_Seafood | Halibut, cooked, NS as to cooking method                       | 100                | 4                  | B           | 1             |
| 26118020 | 5800_Seafood | Halibut, baked or broiled, made with oil                       | 100                | 4                  | B           | 2             |
| 26153100 | 5800_Seafood | Tuna, fresh, raw                                               | 100                | 4.5                | A           | 1             |
| 26321110 | 5800_Seafood | Snails, cooked, NS as to cooking method                        | 100                | 4                  | B           | 2             |
| 26137100 | 5800_Seafood | Salmon, raw                                                    | 98                 | 4.5                | A           | 1             |
| 26100100 | 5800_Seafood | Fish, NS as to type, raw                                       | 97                 | 4.5                | A           | 1             |
| 26309160 | 5800_Seafood | Crayfish, boiled or steamed                                    | 97                 | 4                  | A           | 1             |
| 26153170 | 5800_Seafood | Tuna, fresh, dried                                             | 97                 | 4.5                | B           | 3             |
| 26133100 | 5800_Seafood | Porgy, raw                                                     | 96                 | 4.5                | A           | 1             |
| 26117110 | 5800_Seafood | Haddock, cooked, NS as to cooking method                       | 96                 | 4                  | B           | 2             |
| 26117120 | 5800_Seafood | Haddock, baked or broiled, fat added in cooking                | 96                 | 4                  | B           | 2             |
| 26153110 | 5800_Seafood | Tuna, fresh, cooked, NS as to cooking method                   | 95                 | 4                  | B           | 2             |
| 26153120 | 5800_Seafood | Tuna, fresh, baked or broiled, fat added in cooking            | 95                 | 4                  | B           | 2             |
| 26315100 | 5800_Seafood | Oysters, raw                                                   | 95                 | 4                  | A           | 1             |
| 26137170 | 5800_Seafood | Salmon, dried                                                  | 94                 | 4.5                | C           | 3             |
| 27150230 | 5800_Seafood | Shrimp scampi                                                  | 94                 | 4                  | A           | 2             |
| 26315180 | 5800_Seafood | Oysters, canned                                                | 94                 | 4                  | A           | 3             |
| 26209100 | 5800_Seafood | Roe, herring                                                   | 94                 | 4.5                | A           | 1             |
| 26118024 | 5800_Seafood | Halibut, baked or broiled, made with cooking spray             | 94                 | 4                  | B           | 2             |
| 26118022 | 5800_Seafood | Halibut, baked or broiled, made with margarine                 | 93                 | 4                  | B           | 1             |
| 26139180 | 5800_Seafood | Sardines, canned in oil                                        | 92                 | 4                  | B           | 3             |
| 26305120 | 5800_Seafood | Crab, baked or broiled, fat added in cooking                   | 92                 | 3.5                | C           | 2             |
| 26137120 | 5800_Seafood | Salmon, baked or broiled, made with oil                        | 92                 | 4                  | B           | 2             |
| 26139110 | 5800_Seafood | Sardines, cooked                                               | 92                 | 4                  | B           | 3             |
| 26137110 | 5800_Seafood | Salmon, cooked, NS as to cooking method                        | 92                 | 4                  | B           | 2             |
| 26115000 | 5800_Seafood | Flounder, raw                                                  | 92                 | 4.5                | A           | 1             |
| 26121100 | 5800_Seafood | Mackerel, raw                                                  | 92                 | 4                  | A           | 1             |
| 26129120 | 5800_Seafood | Pike, baked or broiled, fat added in cooking                   | 91                 | 4                  | B           | 2             |
| 26118023 | 5800_Seafood | Halibut, baked or broiled, made without fat                    | 91                 | 4                  | B           | 1             |
| 26215120 | 5800_Seafood | Turtle, cooked, NS as to cooking method                        | 91                 | 4                  | B           | 2             |
| 26109120 | 5800_Seafood | Cod, baked or broiled, made with oil                           | 91                 | 4                  | B           | 2             |
| 26109110 | 5800_Seafood | Cod, cooked, NS as to cooking method                           | 91                 | 4                  | B           | 2             |
| 26118050 | 5800_Seafood | Halibut, steamed or poached                                    | 91                 | 4                  | B           | 1             |
| 26147120 | 5800_Seafood | Sturgeon, baked or broiled, fat added in cooking               | 91                 | 4                  | B           | 1             |
| 26125100 | 5800_Seafood | Ocean perch, raw                                               | 90                 | 4.5                | A           | 1             |
| 26100120 | 5800_Seafood | Fish, NS as to type, baked or broiled, made with oil           | 90                 | 4                  | B           | 2             |
| 26100110 | 5800_Seafood | Fish, NS as to type, cooked, NS as to cooking method           | 90                 | 4                  | B           | 2             |
| 26213100 | 5800_Seafood | Squid, raw                                                     | 89                 | 4.5                | A           | 1             |
| 26147110 | 5800_Seafood | Sturgeon, cooked, NS as to cooking method                      | 89                 | 4                  | B           | 2             |
| 26319120 | 5800_Seafood | Shrimp, baked or broiled, made with oil                        | 89                 | 4                  | B           | 2             |
| 26311120 | 5800_Seafood | Lobster, baked or broiled, fat added in cooking                | 89                 | 3.5                | C           | 2             |
| 26119100 | 5800_Seafood | Herring, raw                                                   | 89                 | 4                  | A           | 1             |
| 26127120 | 5800_Seafood | Perch, baked or broiled, made with oil                         | 89                 | 4                  | B           | 2             |
| 26127124 | 5800_Seafood | Perch, baked or broiled, made with cooking spray               | 88                 | 4                  | B           | 1             |
| 26207110 | 5800_Seafood | Roe, shad, cooked                                              | 87                 | 4                  | C           | 2             |
| 26100124 | 5800_Seafood | Fish, NS as to type, baked or broiled, made with cooking spray | 87                 | 4                  | B           | 1             |
| 26115120 | 5800_Seafood | Flounder, baked or broiled, made with oil                      | 87                 | 4                  | B           | 2             |
| 26109180 | 5800_Seafood | Cod, dried, salted, salt removed in water                      | 87                 | 4.5                | A           | 3             |
| 26137124 | 5800_Seafood | Salmon, baked or broiled, made with cooking spray              | 87                 | 4                  | B           | 2             |
| 26137123 | 5800_Seafood | Salmon, baked or broiled, made without fat                     | 86                 | 4                  | B           | 1             |
| 26141110 | 5800_Seafood | Sea bass, cooked, NS as to cooking method                      | 86                 | 4                  | B           | 2             |
| 26141120 | 5800_Seafood | Sea bass, baked or broiled, fat added in cooking               | 86                 | 4                  | B           | 2             |
| 26157120 | 5800_Seafood | Whiting, baked or broiled, made with oil                       | 86                 | 4                  | B           | 2             |
| 26149110 | 5800_Seafood | Swordfish, cooked, NS as to cooking method                     | 86                 | 4                  | C           | 2             |
| 26149120 | 5800_Seafood | Swordfish, baked or broiled, fat added in cooking              | 86                 | 4                  | C           | 2             |
| 26125110 | 5800_Seafood | Ocean perch, cooked, NS as to cooking method                   | 86                 | 4                  | B           | 2             |
| 26125120 | 5800_Seafood | Ocean perch, baked or broiled, fat added in cooking            | 86                 | 4                  | B           | 2             |
| 26158000 | 5800_Seafood | Tilapia, cooked, NS as to cooking method                       | 86                 | 4                  | B           | 2             |
| 26158010 | 5800_Seafood | Tilapia, baked or broiled, made with oil                       | 86                 | 4                  | B           | 2             |
| 26123100 | 5800_Seafood | Mullet, raw                                                    | 85                 | 4.5                | A           | 1             |
| 26100160 | 5800_Seafood | Fish, NS as to type, steamed                                   | 85                 | 4                  | B           | 1             |
| 26137160 | 5800_Seafood | Salmon, steamed or poached                                     | 85                 | 4                  | B           | 1             |
| 26313100 | 5800_Seafood | Mussels, raw                                                   | 85                 | 4                  | A           | 1             |
| 26147130 | 5800_Seafood | Sturgeon, steamed                                              | 85                 | 4                  | B           | 1             |
| 26139170 | 5800_Seafood | Sardines, dried                                                | 85                 | 4                  | D           | 3             |
| 26137180 | 5800_Seafood | Salmon, canned                                                 | 85                 | 4                  | B           | 3             |
| 26100123 | 5800_Seafood | Fish, NS as to type, baked or broiled, made without fat        | 85                 | 4                  | B           | 1             |
| 26133120 | 5800_Seafood | Porgy, baked or broiled, fat added in cooking                  | 85                 | 4                  | B           | 2             |
| 26127122 | 5800_Seafood | Perch, baked or broiled, made with margarine                   | 85                 | 4                  | B           | 1             |
| 26133110 | 5800_Seafood | Porgy, cooked, NS as to cooking method                         | 85                 | 4                  | B           | 2             |
| 26319124 | 5800_Seafood | Shrimp, baked or broiled, made with cooking spray              | 85                 | 4                  | B           | 2             |
| 26100122 | 5800_Seafood | Fish, NS as to type, baked or broiled, made with margarine     | 84                 | 4                  | B           | 3             |
| 26315120 | 5800_Seafood | Oysters, baked or broiled, fat added in cooking                | 84                 | 3.5                | B           | 2             |
| 26213120 | 5800_Seafood | Squid, baked or broiled, fat added in cooking                  | 84                 | 4                  | A           | 2             |
| 26151110 | 5800_Seafood | Trout, cooked, NS as to cooking method                         | 84                 | 4                  | C           | 2             |
| 26151120 | 5800_Seafood | Trout, baked or broiled, made with oil                         | 84                 | 4                  | C           | 2             |
| 26153122 | 5800_Seafood | Tuna, fresh, baked or broiled, fat not added in cooking        | 84                 | 4.5                | B           | 1             |
| 26105120 | 5800_Seafood | Carp, baked or broiled, fat added in cooking                   | 84                 | 4                  | B           | 2             |
| 26205170 | 5800_Seafood | Octopus, dried                                                 | 84                 | 1.5                | D           | 3             |
| 26100180 | 5800_Seafood | Fish, NS as to type, canned                                    | 84                 | 4                  | A           | 3             |
| 26155110 | 5800_Seafood | Tuna, canned, NS as to oil or water pack                       | 84                 | 4                  | A           | 3             |
| 26155190 | 5800_Seafood | Tuna, canned, water pack                                       | 84                 | 4                  | A           | 3             |
| 26149121 | 5800_Seafood | Swordfish, baked or broiled, fat not added in cooking          | 83                 | 4                  | C           | 1             |
| 26205190 | 5800_Seafood | Octopus, smoked                                                | 83                 | 4                  | B           | 3             |
| 26111120 | 5800_Seafood | Croaker, baked or broiled, fat added in cooking                | 83                 | 4                  | B           | 2             |
| 26105121 | 5800_Seafood | Carp, baked or broiled, fat not added in cooking               | 83                 | 4                  | B           | 1             |
| 26111110 | 5800_Seafood | Croaker, cooked, NS as to cooking method                       | 83                 | 4                  | B           | 2             |
| 26100190 | 5800_Seafood | Fish, NS as to type, smoked                                    | 83                 | 3.5                | C           | 3             |
| 26137190 | 5800_Seafood | Salmon, smoked                                                 | 83                 | 3.5                | C           | 3             |
| 26151124 | 5800_Seafood | Trout, baked or broiled, made with cooking spray               | 83                 | 4                  | B           | 1             |
| 26117121 | 5800_Seafood | Haddock, baked or broiled, fat not added in cooking            | 82                 | 4                  | B           | 1             |
| 26153160 | 5800_Seafood | Tuna, fresh, steamed or poached                                | 82                 | 4.5                | B           | 1             |
| 26121120 | 5800_Seafood | Mackerel, baked or broiled, fat added in cooking               | 82                 | 3.5                | D           | 2             |
| 26121110 | 5800_Seafood | Mackerel, cooked, NS as to cooking method                      | 82                 | 3.5                | D           | 2             |
| 26103110 | 5800_Seafood | Barracuda, cooked, NS as to cooking method                     | 82                 | 4                  | C           | 1             |
| 26103120 | 5800_Seafood | Barracuda, baked or broiled, fat added in cooking              | 82                 | 4                  | C           | 1             |
| 26115124 | 5800_Seafood | Flounder, baked or broiled, made with cooking spray            | 82                 | 4                  | B           | 2             |
| 26151123 | 5800_Seafood | Trout, baked or broiled, made without fat                      | 82                 | 4                  | B           | 1             |
| 26105160 | 5800_Seafood | Carp, steamed or poached                                       | 81                 | 4                  | B           | 1             |
| 26203160 | 5800_Seafood | Frog legs, steamed                                             | 81                 | 4                  | B           | 1             |
| 26157124 | 5800_Seafood | Whiting, baked or broiled, made with cooking spray             | 81                 | 4                  | B           | 2             |
| 26149160 | 5800_Seafood | Swordfish, steamed or poached                                  | 81                 | 4                  | C           | 1             |
| 26155180 | 5800_Seafood | Tuna, canned, oil pack                                         | 81                 | 4                  | B           | 3             |

| foodcode | level1nd     | Description                                                 | Food Compass Score | Health Star Rating | Nutri-Score | NOVA Category |
|----------|--------------|-------------------------------------------------------------|--------------------|--------------------|-------------|---------------|
| 26319123 | 5800_Seafood | Shrimp, baked or broiled, made without fat                  | 81                 | 4                  | B           | 1             |
| 26118060 | 5800_Seafood | Halibut, smoked                                             | 81                 | 4                  | C           | 3             |
| 26319130 | 5800_Seafood | Shrimp, steamed or boiled                                   | 81                 | 4                  | A           | 1             |
| 26121121 | 5800_Seafood | Mackerel, baked or broiled, fat not added in cooking        | 81                 | 4                  | C           | 1             |
| 26133121 | 5800_Seafood | Porgy, baked or broiled, fat not added in cooking           | 81                 | 4                  | B           | 1             |
| 26315121 | 5800_Seafood | Oysters, baked or broiled, fat not added in cooking         | 80                 | 3.5                | B           | 1             |
| 26117160 | 5800_Seafood | Haddock, steamed or poached                                 | 80                 | 4                  | B           | 1             |
| 26141121 | 5800_Seafood | Sea bass, baked or broiled, fat not added in cooking        | 80                 | 4                  | B           | 1             |
| 26131100 | 5800_Seafood | Pompano, raw                                                | 80                 | 4                  | B           | 1             |
| 26305110 | 5800_Seafood | Crab, cooked, NS as to cooking method                       | 80                 | 3.5                | C           | 1             |
| 26305160 | 5800_Seafood | Crab, hard shell, steamed                                   | 80                 | 3.5                | C           | 1             |
| 26115123 | 5800_Seafood | Flounder, baked or broiled, made without fat                | 80                 | 4                  | B           | 1             |
| 26113190 | 5800_Seafood | Eel, smoked                                                 | 79                 | 3.5                | D           | 1             |
| 26317110 | 5800_Seafood | Scallops, cooked, NS as to cooking method                   | 79                 | 4                  | B           | 2             |
| 26317120 | 5800_Seafood | Scallops, baked or broiled, fat added in cooking            | 79                 | 4                  | B           | 2             |
| 26115190 | 5800_Seafood | Flounder, smoked                                            | 79                 | 4.5                | B           | 1             |
| 26151160 | 5800_Seafood | Trout, steamed or poached                                   | 79                 | 4                  | B           | 1             |
| 26305180 | 5800_Seafood | Crab, canned                                                | 79                 | 4                  | B           | 3             |
| 26157123 | 5800_Seafood | Whiting, baked or broiled, made without fat                 | 79                 | 4                  | B           | 1             |
| 26141160 | 5800_Seafood | Sea bass, steamed or poached                                | 79                 | 4                  | B           | 1             |
| 26158014 | 5800_Seafood | Tilapia, baked or broiled, made with cooking spray          | 79                 | 4                  | B           | 2             |
| 26113160 | 5800_Seafood | Eel, steamed or poached                                     | 79                 | 4                  | C           | 1             |
| 26135110 | 5800_Seafood | Ray, cooked, NS as to cooking method                        | 79                 | 4                  | B           | 1             |
| 26123120 | 5800_Seafood | Mullet, baked or broiled, fat added in cooking              | 78                 | 4                  | B           | 2             |
| 26315110 | 5800_Seafood | Oysters, cooked, NS as to cooking method                    | 78                 | 3                  | C           | 2             |
| 26115160 | 5800_Seafood | Flounder, steamed or poached                                | 78                 | 4                  | B           | 1             |
| 26125121 | 5800_Seafood | Ocean perch, baked or broiled, fat not added in cooking     | 78                 | 4                  | B           | 1             |
| 26133160 | 5800_Seafood | Porgy, steamed or poached                                   | 78                 | 4                  | B           | 1             |
| 26119120 | 5800_Seafood | Herring, baked or broiled, fat added in cooking             | 78                 | 4                  | C           | 2             |
| 26129121 | 5800_Seafood | Pike, baked or broiled, fat not added in cooking            | 78                 | 4                  | B           | 1             |
| 26315190 | 5800_Seafood | Oysters, smoked                                             | 78                 | 3.5                | B           | 3             |
| 26157160 | 5800_Seafood | Whiting, steamed or poached                                 | 78                 | 4                  | B           | 1             |
| 26103121 | 5800_Seafood | Barracuda, baked or broiled, fat not added in cooking       | 78                 | 4                  | C           | 1             |
| 26213121 | 5800_Seafood | Squid, baked or broiled, fat not added in cooking           | 78                 | 4                  | B           | 1             |
| 26119121 | 5800_Seafood | Herring, baked or broiled, fat not added in cooking         | 78                 | 4                  | C           | 1             |
| 26125160 | 5800_Seafood | Ocean perch, steamed or poached                             | 78                 | 4                  | B           | 1             |
| 26127123 | 5800_Seafood | Perch, baked or broiled, made without fat                   | 77                 | 4                  | B           | 1             |
| 27150140 | 5800_Seafood | Clam sauce, white                                           | 77                 | 3                  | C           | 2             |
| 26143110 | 5800_Seafood | Shark, cooked, NS as to cooking method                      | 77                 | 4                  | B           | 2             |
| 26143120 | 5800_Seafood | Shark, baked or broiled, fat added in cooking               | 77                 | 4                  | B           | 2             |
| 26135120 | 5800_Seafood | Ray, baked or broiled, fat added in cooking                 | 77                 | 4                  | B           | 2             |
| 26315130 | 5800_Seafood | Oysters, steamed                                            | 77                 | 3.5                | B           | 1             |
| 26158013 | 5800_Seafood | Tilapia, baked or broiled, made without fat                 | 77                 | 4                  | B           | 1             |
| 26119110 | 5800_Seafood | Herring, cooked, NS as to cooking method                    | 77                 | 4                  | C           | 3             |
| 26305121 | 5800_Seafood | Crab, baked or broiled, fat not added in cooking            | 76                 | 3.5                | C           | 1             |
| 26319180 | 5800_Seafood | Shrimp, canned                                              | 76                 | 3.5                | C           | 3             |
| 26139190 | 5800_Seafood | Sardines, skinless, boneless, packed in water               | 76                 | 4                  | C           | 3             |
| 26213190 | 5800_Seafood | Squid, canned                                               | 76                 | 4                  | A           | 3             |
| 26129160 | 5800_Seafood | Pike, steamed or poached                                    | 76                 | 4                  | B           | 1             |
| 26121190 | 5800_Seafood | Mackerel, smoked                                            | 76                 | 4                  | C           | 3             |
| 26153190 | 5800_Seafood | Tuna, fresh, smoked                                         | 76                 | 4                  | C           | 3             |
| 26127160 | 5800_Seafood | Perch, steamed or poached                                   | 76                 | 4                  | B           | 1             |
| 26103160 | 5800_Seafood | Barracuda, steamed or poached                               | 76                 | 4                  | C           | 1             |
| 26151190 | 5800_Seafood | Trout, smoked                                               | 76                 | 4                  | D           | 3             |
| 26205180 | 5800_Seafood | Octopus, dried, boiled                                      | 76                 | 4                  | C           | 3             |
| 26301110 | 5800_Seafood | Abalone, cooked, NS as to cooking method                    | 76                 | 4                  | C           | 2             |
| 26111121 | 5800_Seafood | Croaker, baked or broiled, fat not added in cooking         | 76                 | 4                  | B           | 1             |
| 26311180 | 5800_Seafood | Lobster, canned                                             | 76                 | 4                  | B           | 3             |
| 26153130 | 5800_Seafood | Tuna, fresh, coated, baked or broiled, fat added in cooking | 76                 | 4                  | B           | 2             |
| 26315160 | 5800_Seafood | Oysters, coated, baked or broiled, fat added in cooking     | 75                 | 3.5                | B           | 2             |
| 26121180 | 5800_Seafood | Mackerel, canned                                            | 75                 | 4                  | B           | 3             |
| 26158050 | 5800_Seafood | Tilapia, steamed or poached                                 | 75                 | 4                  | B           | 1             |
| 26135121 | 5800_Seafood | Ray, baked or broiled, fat not added in cooking             | 75                 | 4                  | B           | 1             |
| 26143121 | 5800_Seafood | Shark, baked or broiled, fat not added in cooking           | 75                 | 4                  | B           | 1             |
| 26141180 | 5800_Seafood | Sea bass, pickled                                           | 75                 | 3.5                | B           | 3             |
| 26137122 | 5800_Seafood | Salmon, baked or broiled, made with margarine               | 75                 | 4                  | B           | 4             |
| 26205110 | 5800_Seafood | Octopus, cooked, NS as to cooking method                    | 74                 | 3.5                | C           | 2             |
| 26105190 | 5800_Seafood | Carp, smoked                                                | 74                 | 3.5                | C           | 3             |
| 26119170 | 5800_Seafood | Herring, dried, salted                                      | 74                 | 0.5                | E           | 3             |
| 26137130 | 5800_Seafood | Salmon, coated, baked or broiled, made with oil             | 74                 | 4                  | B           | 2             |
| 26303100 | 5800_Seafood | Clams, raw                                                  | 74                 | 4.5                | A           | 1             |
| 26111160 | 5800_Seafood | Croaker, steamed or poached                                 | 74                 | 4                  | B           | 1             |
| 26147190 | 5800_Seafood | Sturgeon, smoked                                            | 74                 | 3.5                | D           | 3             |
| 26109123 | 5800_Seafood | Cod, baked or broiled, made without fat                     | 74                 | 4                  | B           | 1             |
| 26205160 | 5800_Seafood | Octopus, steamed                                            | 73                 | 4                  | C           | 1             |
| 26121160 | 5800_Seafood | Mackerel, pickled                                           | 73                 | 3                  | D           | 3             |
| 26311110 | 5800_Seafood | Lobster, cooked, NS as to cooking method                    | 73                 | 3.5                | C           | 1             |
| 26319170 | 5800_Seafood | Shrimp, dried                                               | 73                 | 0.5                | D           | 3             |
| 26319122 | 5800_Seafood | Shrimp, baked or broiled, made with margarine               | 73                 | 4                  | B           | 4             |
| 26109122 | 5800_Seafood | Cod, baked or broiled, made with margarine                  | 73                 | 4                  | B           | 4             |
| 26135160 | 5800_Seafood | Ray, steamed or poached                                     | 73                 | 4                  | B           | 1             |
| 26143160 | 5800_Seafood | Shark, steamed or poached                                   | 73                 | 4                  | B           | 1             |
| 26118021 | 5800_Seafood | Halibut, baked or broiled, made with butter                 | 73                 | 4                  | B           | 1             |
| 26123121 | 5800_Seafood | Mullet, baked or broiled, fat not added in cooking          | 73                 | 4                  | B           | 1             |
| 26313110 | 5800_Seafood | Mussels, cooked, NS as to cooking method                    | 73                 | 3.5                | D           | 1             |
| 26313160 | 5800_Seafood | Mussels, steamed or poached                                 | 73                 | 3.5                | D           | 1             |
| 26137121 | 5800_Seafood | Salmon, baked or broiled, made with butter                  | 73                 | 4                  | C           | 2             |
| 26303110 | 5800_Seafood | Clams, cooked, NS as to cooking method                      | 73                 | 4                  | B           | 2             |
| 26303120 | 5800_Seafood | Clams, baked or broiled, fat added in cooking               | 73                 | 4                  | B           | 2             |
| 26109124 | 5800_Seafood | Cod, baked or broiled, made with cooking spray              | 72                 | 4                  | B           | 2             |
| 26131110 | 5800_Seafood | Pompano, cooked, NS as to cooking method                    | 72                 | 3.5                | C           | 2             |
| 26131120 | 5800_Seafood | Pompano, baked or broiled, fat added in cooking             | 72                 | 3.5                | C           | 2             |
| 26315140 | 5800_Seafood | Oysters, coated, fried                                      | 72                 | 3                  | C           | 2             |
| 26213160 | 5800_Seafood | Squid, steamed or boiled                                    | 72                 | 4                  | B           | 1             |
| 26107120 | 5800_Seafood | Catfish, baked or broiled, made with oil                    | 72                 | 3.5                | C           | 2             |
| 26105110 | 5800_Seafood | Carp, cooked, NS as to cooking method                       | 72                 | 3.5                | C           | 1             |
| 26153140 | 5800_Seafood | Tuna, fresh, coated, fried                                  | 72                 | 4                  | B           | 2             |
| 26109160 | 5800_Seafood | Cod, steamed or poached                                     | 71                 | 4                  | B           | 1             |
| 26213170 | 5800_Seafood | Squid, dried                                                | 71                 | 2                  | D           | 3             |
| 26115122 | 5800_Seafood | Flounder, baked or broiled, made with margarine             | 71                 | 4                  | B           | 4             |
| 26123160 | 5800_Seafood | Mullet, steamed or poached                                  | 71                 | 4                  | B           | 1             |
| 26107123 | 5800_Seafood | Catfish, baked or broiled, made without fat                 | 71                 | 4                  | B           | 1             |
| 26107122 | 5800_Seafood | Catfish, baked or broiled, made with margarine              | 71                 | 3.5                | C           | 1             |
| 26311121 | 5800_Seafood | Lobster, baked or broiled, fat not added in cooking         | 71                 | 3.5                | C           | 1             |

| foodcode | level1nd     | Description                                                     | Food Compass Score | Health Star Rating | Nutri-Score | NOVA Category |
|----------|--------------|-----------------------------------------------------------------|--------------------|--------------------|-------------|---------------|
| 26305130 | 5800_Seafood | Crab, coated, baked or broiled, fat added in cooking            | 70                 | 3.5                | C           | 2             |
| 26149130 | 5800_Seafood | Swordfish, coated, baked or broiled, fat added in cooking       | 70                 | 3.5                | C           | 2             |
| 26113110 | 5800_Seafood | Eel, cooked, NS as to cooking method                            | 70                 | 3.5                | C           | 2             |
| 26137140 | 5800_Seafood | Salmon, coated, fried, made with oil                            | 70                 | 3.5                | C           | 2             |
| 26107124 | 5800_Seafood | Catfish, baked or broiled, made with cooking spray              | 70                 | 4                  | B           | 2             |
| 26211100 | 5800_Seafood | Roe, sturgeon                                                   | 70                 | 1                  | D           | 3             |
| 26151122 | 5800_Seafood | Trout, baked or broiled, made with margarine                    | 70                 | 4                  | C           | 4             |
| 26100121 | 5800_Seafood | Fish, NS as to type, baked or broiled, made with butter         | 69                 | 4                  | B           | 2             |
| 26117190 | 5800_Seafood | Haddock, smoked                                                 | 69                 | 4                  | C           | 3             |
| 26158012 | 5800_Seafood | Tilapia, baked or broiled, made with margarine                  | 69                 | 4                  | B           | 4             |
| 26107160 | 5800_Seafood | Catfish, steamed or poached                                     | 69                 | 4                  | B           | 1             |
| 26151121 | 5800_Seafood | Trout, baked or broiled, made with butter                       | 69                 | 4                  | C           | 2             |
| 26157122 | 5800_Seafood | Whiting, baked or broiled, made with margarine                  | 69                 | 4                  | B           | 4             |
| 26157110 | 5800_Seafood | Whiting, cooked, NS as to cooking method                        | 68                 | 4                  | B           | 2             |
| 26100130 | 5800_Seafood | Fish, NS as to type, coated, baked or broiled, made with oil    | 68                 | 4                  | B           | 2             |
| 26311160 | 5800_Seafood | Lobster, steamed or boiled                                      | 68                 | 3.5                | C           | 1             |
| 26117130 | 5800_Seafood | Haddock, coated, baked or broiled, fat added in cooking         | 68                 | 4                  | B           | 2             |
| 26131121 | 5800_Seafood | Pompano, baked or broiled, fat not added in cooking             | 68                 | 3.5                | C           | 1             |
| 26309140 | 5800_Seafood | Crayfish, coated, fried                                         | 68                 | 4                  | B           | 2             |
| 26151130 | 5800_Seafood | Trout, coated, baked or broiled, made with oil                  | 68                 | 4                  | C           | 2             |
| 26303180 | 5800_Seafood | Clams, canned                                                   | 68                 | 4.5                | A           | 3             |
| 26127110 | 5800_Seafood | Perch, cooked, NS as to cooking method                          | 68                 | 4                  | B           | 2             |
| 26119190 | 5800_Seafood | Herring, smoked, kippered                                       | 68                 | 2                  | D           | 3             |
| 26137134 | 5800_Seafood | Salmon, coated, baked or broiled, made with cooking spray       | 68                 | 4                  | B           | 2             |
| 26131190 | 5800_Seafood | Pompano, smoked                                                 | 68                 | 3.5                | C           | 1             |
| 26317121 | 5800_Seafood | Scallops, baked or broiled, fat not added in cooking            | 67                 | 4                  | B           | 1             |
| 26115110 | 5800_Seafood | Flounder, cooked, NS as to cooking method                       | 67                 | 3.5                | C           | 2             |
| 26123110 | 5800_Seafood | Mullet, cooked, NS as to cooking method                         | 67                 | 3.5                | C           | 1             |
| 27150110 | 5800_Seafood | Shrimp cocktail                                                 | 67                 | 4                  | B           | 3             |
| 26137133 | 5800_Seafood | Salmon, coated, baked or broiled, made without fat              | 67                 | 4                  | B           | 2             |
| 26307140 | 5800_Seafood | Crab, soft shell, coated, fried                                 | 67                 | 3.5                | C           | 2             |
| 26121140 | 5800_Seafood | Mackerel, coated, fried                                         | 66                 | 3.5                | D           | 2             |
| 26149140 | 5800_Seafood | Swordfish, coated, fried                                        | 66                 | 3.5                | C           | 2             |
| 26109130 | 5800_Seafood | Cod, coated, baked or broiled, made with oil                    | 66                 | 3.5                | B           | 2             |
| 26131160 | 5800_Seafood | Pompano, steamed or poached                                     | 66                 | 3.5                | C           | 1             |
| 26133130 | 5800_Seafood | Porgy, coated, baked or broiled, fat added in cooking           | 66                 | 4                  | B           | 2             |
| 26213180 | 5800_Seafood | Squid, pickled                                                  | 65                 | 1.5                | D           | 3             |
| 26119130 | 5800_Seafood | Herring, coated, baked or broiled, fat added in cooking         | 65                 | 3.5                | C           | 2             |
| 26319110 | 5800_Seafood | Shrimp, cooked, NS as to cooking method                         | 65                 | 3.5                | B           | 2             |
| 26203110 | 5800_Seafood | Frog legs, NS as to cooking method                              | 65                 | 4                  | B           | 2             |
| 26127130 | 5800_Seafood | Perch, coated, baked or broiled, made with oil                  | 65                 | 4                  | B           | 2             |
| 26109190 | 5800_Seafood | Cod, smoked                                                     | 65                 | 4                  | B           | 3             |
| 26117140 | 5800_Seafood | Haddock, coated, fried                                          | 65                 | 4                  | B           | 2             |
| 26213140 | 5800_Seafood | Squid, coated, fried                                            | 65                 | 3.5                | C           | 2             |
| 26151140 | 5800_Seafood | Trout, coated, fried, made with oil                             | 65                 | 3.5                | C           | 2             |
| 26157130 | 5800_Seafood | Whiting, coated, baked or broiled, made with oil                | 65                 | 4                  | B           | 2             |
| 26100140 | 5800_Seafood | Fish, NS as to type, coated, fried, made with oil               | 65                 | 3.5                | C           | 2             |
| 26158020 | 5800_Seafood | Tilapia, coated, baked or broiled, made with oil                | 65                 | 4                  | B           | 2             |
| 26111130 | 5800_Seafood | Croaker, coated, baked or broiled, fat added in cooking         | 65                 | 4                  | B           | 2             |
| 26141130 | 5800_Seafood | Sea bass, coated, baked or broiled, fat added in cooking        | 64                 | 4                  | B           | 2             |
| 26129110 | 5800_Seafood | Pike, cooked, NS as to cooking method                           | 64                 | 4                  | B           | 1             |
| 26125130 | 5800_Seafood | Ocean perch, coated, baked or broiled, fat added in cooking     | 64                 | 3.5                | B           | 2             |
| 26105140 | 5800_Seafood | Carp, coated, fried                                             | 64                 | 3.5                | C           | 2             |
| 26101110 | 5800_Seafood | Anchovy, cooked, NS as to cooking method                        | 63                 | 0.5                | D           | 3             |
| 26101180 | 5800_Seafood | Anchovy, canned                                                 | 63                 | 0.5                | D           | 3             |
| 26115130 | 5800_Seafood | Flounder, coated, baked or broiled, made with oil               | 63                 | 3.5                | B           | 2             |
| 26303121 | 5800_Seafood | Clams, baked or broiled, fat not added in cooking               | 63                 | 4                  | B           | 1             |
| 26319160 | 5800_Seafood | Shrimp, coated, baked or broiled, made with oil                 | 63                 | 3.5                | B           | 2             |
| 26317160 | 5800_Seafood | Scallops, coated, baked or broiled, fat added in cooking        | 62                 | 3.5                | B           | 2             |
| 26109140 | 5800_Seafood | Cod, coated, fried, made with oil                               | 62                 | 3.5                | B           | 2             |
| 26111140 | 5800_Seafood | Croaker, coated, fried                                          | 62                 | 3.5                | C           | 2             |
| 26133140 | 5800_Seafood | Porgy, coated, fried                                            | 62                 | 3.5                | C           | 2             |
| 26151133 | 5800_Seafood | Trout, coated, baked or broiled, made without fat               | 62                 | 4                  | B           | 2             |
| 26157140 | 5800_Seafood | Whiting, coated, fried, made with oil                           | 62                 | 4                  | B           | 2             |
| 26311140 | 5800_Seafood | Lobster, coated, fried                                          | 62                 | 3.5                | C           | 2             |
| 26118030 | 5800_Seafood | Halibut, coated, baked or broiled, made with oil                | 62                 | 4                  | B           | 4             |
| 26137143 | 5800_Seafood | Salmon, coated, fried, made without fat                         | 62                 | 4                  | C           | 2             |
| 26127140 | 5800_Seafood | Perch, coated, fried, made with oil                             | 61                 | 4                  | B           | 2             |
| 26125140 | 5800_Seafood | Ocean perch, coated, fried                                      | 61                 | 3.5                | B           | 2             |
| 26158011 | 5800_Seafood | Tilapia, baked or broiled, made with butter                     | 61                 | 4                  | B           | 2             |
| 26100133 | 5800_Seafood | Fish, NS as to type, coated, baked or broiled, made without fat | 61                 | 4                  | B           | 2             |
| 26158030 | 5800_Seafood | Tilapia, coated, fried, made with oil                           | 61                 | 4                  | C           | 2             |
| 26119140 | 5800_Seafood | Herring, coated, fried                                          | 61                 | 3.5                | C           | 2             |
| 26129140 | 5800_Seafood | Pike, coated, fried                                             | 61                 | 4                  | B           | 2             |
| 26115121 | 5800_Seafood | Flounder, baked or broiled, made with butter                    | 61                 | 3.5                | B           | 1             |
| 26141140 | 5800_Seafood | Sea bass, coated, fried                                         | 61                 | 3.5                | C           | 2             |
| 26319121 | 5800_Seafood | Shrimp, baked or broiled, made with butter                      | 60                 | 3.5                | C           | 2             |
| 26115140 | 5800_Seafood | Flounder, coated, fried, made with oil                          | 60                 | 3.5                | C           | 2             |
| 26119131 | 5800_Seafood | Herring, coated, baked or broiled, fat not added in cooking     | 60                 | 3.5                | C           | 2             |
| 26317130 | 5800_Seafood | Scallops, steamed or boiled                                     | 60                 | 4                  | C           | 1             |
| 26107110 | 5800_Seafood | Catfish, cooked, NS as to cooking method                        | 60                 | 3.5                | C           | 2             |
| 26151142 | 5800_Seafood | Trout, coated, fried, made with margarine                       | 59                 | 4                  | C           | 3             |
| 26127121 | 5800_Seafood | Perch, baked or broiled, made with butter                       | 59                 | 4                  | B           | 2             |
| 26121131 | 5800_Seafood | Mackerel, coated, baked or broiled, fat added in cooking        | 59                 | 3.5                | C           | 4             |
| 26100142 | 5800_Seafood | Fish, NS as to type, coated, fried, made with margarine         | 59                 | 3.5                | C           | 3             |
| 26123140 | 5800_Seafood | Mullet, coated, fried                                           | 59                 | 3.5                | C           | 2             |
| 26319140 | 5800_Seafood | Shrimp, coated, fried, made with oil                            | 59                 | 3.5                | B           | 2             |
| 26131140 | 5800_Seafood | Pompano, coated, fried                                          | 58                 | 3.5                | D           | 2             |
| 26109121 | 5800_Seafood | Cod, baked or broiled, made with butter                         | 58                 | 3.5                | C           | 2             |
| 26157132 | 5800_Seafood | Whiting, coated, baked or broiled, made with margarine          | 58                 | 4                  | B           | 3             |
| 26317140 | 5800_Seafood | Scallops, coated, fried                                         | 58                 | 3.5                | C           | 2             |
| 26137132 | 5800_Seafood | Salmon, coated, baked or broiled, made with margarine           | 58                 | 4                  | B           | 4             |
| 26301160 | 5800_Seafood | Abalone, steamed or poached                                     | 57                 | 3.5                | D           | 1             |
| 26117131 | 5800_Seafood | Haddock, coated, baked or broiled, fat not added in cooking     | 57                 | 4                  | B           | 2             |
| 26115132 | 5800_Seafood | Flounder, coated, baked or broiled, made with margarine         | 57                 | 3.5                | B           | 3             |
| 26103130 | 5800_Seafood | Barracuda, coated, baked or broiled, fat added in cooking       | 57                 | 3.5                | C           | 4             |
| 26118040 | 5800_Seafood | Halibut, coated, fried, made with oil                           | 57                 | 4                  | B           | 4             |
| 26118032 | 5800_Seafood | Halibut, coated, baked or broiled, made with margarine          | 57                 | 4                  | B           | 4             |
| 26107121 | 5800_Seafood | Catfish, baked or broiled, made with butter                     | 57                 | 3.5                | C           | 1             |
| 26105130 | 5800_Seafood | Carp, coated, baked or broiled, fat added in cooking            | 57                 | 4                  | B           | 4             |
| 26100170 | 5800_Seafood | Fish, NS as to type, dried                                      | 57                 | 0.5                | D           | 3             |
| 26109170 | 5800_Seafood | Cod, dried, salted                                              | 57                 | 0.5                | D           | 3             |
| 26137131 | 5800_Seafood | Salmon, coated, baked or broiled, made with butter              | 56                 | 3.5                | C           | 2             |
| 26303160 | 5800_Seafood | Clams, steamed or boiled                                        | 56                 | 4                  | B           | 1             |

| foodcode | level1nd     | Description                                                            | Food Compass Score | Health Star Rating | Nutri-Score | NOVA Category |
|----------|--------------|------------------------------------------------------------------------|--------------------|--------------------|-------------|---------------|
| 26157121 | 5800_Seafood | Whiting, baked or broiled, made with butter                            | 56                 | 4                  | B           | 2             |
| 26151143 | 5800_Seafood | Trout, coated, fried, made without fat                                 | 56                 | 4                  | B           | 2             |
| 26100143 | 5800_Seafood | Fish, NS as to type, coated, fried, made without fat                   | 56                 | 4                  | C           | 2             |
| 26213130 | 5800_Seafood | Squid, coated, baked or broiled, fat added in cooking                  | 56                 | 4                  | B           | 4             |
| 26158024 | 5800_Seafood | Tilapia, coated, baked or broiled, made with cooking spray             | 56                 | 4                  | B           | 2             |
| 26107130 | 5800_Seafood | Catfish, coated, baked or broiled, made with oil                       | 55                 | 3.5                | C           | 2             |
| 26118034 | 5800_Seafood | Hallibut, coated, baked or broiled, made with cooking spray            | 55                 | 4                  | B           | 4             |
| 26127133 | 5800_Seafood | Perch, coated, baked or broiled, made without fat                      | 55                 | 4                  | B           | 2             |
| 26303140 | 5800_Seafood | Clams, coated, fried                                                   | 55                 | 3.5                | B           | 2             |
| 26158032 | 5800_Seafood | Tilapia, coated, fried, made with margarine                            | 55                 | 4                  | C           | 3             |
| 26121132 | 5800_Seafood | Mackerel, coated, baked or broiled, fat not added in cooking           | 55                 | 3.5                | C           | 4             |
| 26153131 | 5800_Seafood | Tuna, fresh, coated, baked or broiled, fat not added                   | 54                 | 4                  | B           | 4             |
| 26147140 | 5800_Seafood | Sturgeon, coated, fried                                                | 54                 | 3.5                | C           | 4             |
| 26158023 | 5800_Seafood | Tilapia, coated, baked or broiled, made without fat                    | 54                 | 4                  | B           | 2             |
| 26118033 | 5800_Seafood | Hallibut, coated, baked or broiled, made without fat                   | 54                 | 4                  | B           | 4             |
| 26157133 | 5800_Seafood | Whiting, coated, baked or broiled, made without fat                    | 54                 | 4                  | B           | 2             |
| 26311170 | 5800_Seafood | Lobster, coated, baked or broiled, fat added in cooking                | 54                 | 3.5                | C           | 4             |
| 26129130 | 5800_Seafood | Pike, coated, baked or broiled, fat added in cooking                   | 53                 | 4                  | B           | 4             |
| 26137142 | 5800_Seafood | Salmon, coated, fried, made with margarine                             | 53                 | 3.5                | C           | 4             |
| 26319142 | 5800_Seafood | Shrimp, coated, fried, made with margarine                             | 53                 | 3.5                | C           | 3             |
| 26151132 | 5800_Seafood | Trout, coated, baked or broiled, made with margarine                   | 53                 | 4                  | C           | 4             |
| 26319164 | 5800_Seafood | Shrimp, coated, baked or broiled, made with cooking spray              | 53                 | 4                  | B           | 2             |
| 26107140 | 5800_Seafood | Catfish, coated, fried, made with oil                                  | 53                 | 3.5                | C           | 2             |
| 26109134 | 5800_Seafood | Cod, coated, baked or broiled, made with cooking spray                 | 53                 | 4                  | B           | 2             |
| 26100132 | 5800_Seafood | Fish, NS as to type, coated, baked or broiled, made with margarine     | 53                 | 4                  | B           | 4             |
| 26149131 | 5800_Seafood | Swordfish, coated, baked or broiled, fat not added in cooking          | 53                 | 4                  | B           | 4             |
| 26103140 | 5800_Seafood | Barracuda, coated, fried                                               | 53                 | 3.5                | C           | 4             |
| 26109133 | 5800_Seafood | Cod, coated, baked or broiled, made without fat                        | 52                 | 4                  | B           | 2             |
| 26303190 | 5800_Seafood | Clams, smoked, in oil                                                  | 52                 | 3.5                | C           | 3             |
| 26100200 | 5800_Seafood | Fish, NS as to type, from fast food                                    | 52                 | 3.5                | C           | 4             |
| 26119180 | 5800_Seafood | Herring, pickled                                                       | 52                 | 2                  | D           | 3             |
| 27150070 | 5800_Seafood | Lobster with butter sauce                                              | 52                 | 3.5                | D           | 2             |
| 26118042 | 5800_Seafood | Hallibut, coated, fried, made with margarine                           | 52                 | 4                  | B           | 4             |
| 26115133 | 5800_Seafood | Flounder, coated, baked or broiled, made without fat                   | 52                 | 4                  | B           | 2             |
| 26315161 | 5800_Seafood | Oysters, coated, baked or broiled, fat not added in cooking            | 51                 | 3.5                | B           | 4             |
| 26103131 | 5800_Seafood | Barracuda, coated, baked or broiled, fat not added in cooking          | 51                 | 4                  | C           | 4             |
| 26131130 | 5800_Seafood | Pompano, coated, baked or broiled, fat added in cooking                | 51                 | 3.5                | C           | 4             |
| 26151134 | 5800_Seafood | Trout, coated, baked or broiled, made with cooking spray               | 51                 | 4                  | B           | 4             |
| 26137144 | 5800_Seafood | Salmon, coated, fried, made with cooking spray                         | 51                 | 4                  | C           | 4             |
| 26105131 | 5800_Seafood | Carp, coated, baked or broiled, fat not added in cooking               | 51                 | 4                  | B           | 4             |
| 26319163 | 5800_Seafood | Shrimp, coated, baked or broiled, made without fat                     | 50                 | 4                  | B           | 2             |
| 26135130 | 5800_Seafood | Ray, coated, baked or broiled, fat added in cooking                    | 50                 | 4                  | B           | 4             |
| 26143130 | 5800_Seafood | Shark, coated, baked or broiled, fat added in cooking                  | 50                 | 4                  | B           | 4             |
| 26100134 | 5800_Seafood | Fish, NS as to type, coated, baked or broiled, made with cooking spray | 50                 | 4                  | B           | 4             |
| 26127143 | 5800_Seafood | Perch, coated, fried, made without fat                                 | 50                 | 4                  | B           | 2             |
| 26158034 | 5800_Seafood | Tilapia, coated, fried, made with cooking spray                        | 50                 | 4                  | B           | 2             |
| 26123130 | 5800_Seafood | Mullet, coated, baked or broiled, fat added in cooking                 | 50                 | 4                  | B           | 4             |
| 26107133 | 5800_Seafood | Catfish, coated, baked or broiled, made without fat                    | 49                 | 4                  | B           | 2             |
| 26109144 | 5800_Seafood | Cod, coated, fried, made with cooking spray                            | 49                 | 4                  | B           | 2             |
| 26118044 | 5800_Seafood | Hallibut, coated, fried, made with cooking spray                       | 49                 | 4                  | B           | 4             |
| 26158033 | 5800_Seafood | Tilapia, coated, fried, made without fat                               | 49                 | 4                  | B           | 2             |
| 26109132 | 5800_Seafood | Cod, coated, baked or broiled, made with margarine                     | 48                 | 3.5                | B           | 4             |
| 26158022 | 5800_Seafood | Tilapia, coated, baked or broiled, made with margarine                 | 48                 | 4                  | B           | 4             |
| 26127132 | 5800_Seafood | Perch, coated, baked or broiled, made with margarine                   | 48                 | 4                  | B           | 4             |
| 26118043 | 5800_Seafood | Hallibut, coated, fried, made without fat                              | 48                 | 4                  | B           | 4             |
| 26109143 | 5800_Seafood | Cod, coated, fried, made without fat                                   | 47                 | 4                  | B           | 2             |
| 26319143 | 5800_Seafood | Shrimp, coated, fried, made without fat                                | 47                 | 4                  | B           | 2             |
| 26303130 | 5800_Seafood | Clams, coated, baked or broiled, fat added in cooking                  | 47                 | 4                  | B           | 4             |
| 26143140 | 5800_Seafood | Shark, coated, fried                                                   | 47                 | 3.5                | C           | 4             |
| 26135140 | 5800_Seafood | Ray, coated, fried                                                     | 47                 | 3.5                | C           | 4             |
| 26305131 | 5800_Seafood | Crab, coated, baked or broiled, fat not added in cooking               | 46                 | 3.5                | C           | 4             |
| 26319162 | 5800_Seafood | Shrimp, coated, baked or broiled, made with margarine                  | 46                 | 4                  | B           | 4             |
| 26109142 | 5800_Seafood | Cod, coated, fried, made with margarine                                | 46                 | 3.5                | C           | 4             |
| 26133131 | 5800_Seafood | Porgy, coated, baked or broiled, fat not added in cooking              | 46                 | 4                  | B           | 4             |
| 26127134 | 5800_Seafood | Perch, coated, baked or broiled, made with cooking spray               | 46                 | 4                  | B           | 4             |
| 26100144 | 5800_Seafood | Fish, NS as to type, coated, fried, made with cooking spray            | 45                 | 4                  | C           | 4             |
| 26151144 | 5800_Seafood | Trout, coated, fried, made with cooking spray                          | 45                 | 4                  | B           | 4             |
| 26119160 | 5800_Seafood | Herring, pickled, in cream sauce                                       | 45                 | 2                  | D           | 3             |
| 26213131 | 5800_Seafood | Squid, coated, baked or broiled, fat not added in cooking              | 45                 | 4                  | A           | 4             |
| 26158021 | 5800_Seafood | Tilapia, coated, baked or broiled, made with butter                    | 45                 | 3.5                | C           | 2             |
| 26107143 | 5800_Seafood | Catfish, coated, fried, made without fat                               | 44                 | 3.5                | C           | 2             |
| 26129131 | 5800_Seafood | Pike, coated, baked or broiled, fat not added in cooking               | 44                 | 4                  | A           | 4             |
| 26157142 | 5800_Seafood | Whiting, coated, fried, made with margarine                            | 44                 | 3.5                | C           | 4             |
| 26301140 | 5800_Seafood | Abalone, floured or breaded, fried                                     | 44                 | 3.5                | C           | 4             |
| 26135131 | 5800_Seafood | Ray, coated, baked or broiled, fat not added in cooking                | 44                 | 4                  | B           | 4             |
| 26143131 | 5800_Seafood | Shark, coated, baked or broiled, fat not added in cooking              | 44                 | 4                  | B           | 4             |
| 26127142 | 5800_Seafood | Perch, coated, fried, made with margarine                              | 44                 | 4                  | B           | 4             |
| 26141131 | 5800_Seafood | Sea bass, coated, baked or broiled, fat not added in cooking           | 44                 | 4                  | B           | 4             |
| 26157134 | 5800_Seafood | Whiting, coated, baked or broiled, made with cooking spray             | 44                 | 4                  | B           | 4             |
| 26115142 | 5800_Seafood | Flounder, coated, fried, made with margarine                           | 44                 | 3.5                | C           | 4             |
| 26131131 | 5800_Seafood | Pompano, coated, baked or broiled, fat not added in cooking            | 44                 | 3.5                | C           | 4             |
| 26111131 | 5800_Seafood | Croaker, coated, baked or broiled, fat not added in cooking            | 43                 | 4                  | B           | 4             |
| 26115134 | 5800_Seafood | Flounder, coated, baked or broiled, made with cooking spray            | 42                 | 4                  | B           | 4             |
| 26151131 | 5800_Seafood | Trout, coated, baked or broiled, made with butter                      | 41                 | 3.5                | C           | 4             |
| 26123131 | 5800_Seafood | Mullet, coated, baked or broiled, fat not added in cooking             | 41                 | 4                  | B           | 4             |
| 26118031 | 5800_Seafood | Hallibut, coated, baked or broiled, made with butter                   | 41                 | 3.5                | C           | 4             |
| 26125131 | 5800_Seafood | Ocean perch, coated, baked or broiled, fat not added in cooking        | 41                 | 4                  | B           | 4             |
| 26107132 | 5800_Seafood | Catfish, coated, baked or broiled, made with margarine                 | 40                 | 3.5                | C           | 4             |
| 26311171 | 5800_Seafood | Lobster, coated, baked or broiled, fat not added in cooking            | 40                 | 3.5                | C           | 4             |
| 26127144 | 5800_Seafood | Perch, coated, fried, made with cooking spray                          | 39                 | 4                  | B           | 4             |
| 26317161 | 5800_Seafood | Scallops, coated, baked or broiled, fat not added in cooking           | 38                 | 3.5                | B           | 4             |
| 26100131 | 5800_Seafood | Fish, NS as to type, coated, baked or broiled, made with butter        | 38                 | 3.5                | C           | 4             |
| 26107134 | 5800_Seafood | Catfish, coated, baked or broiled, made with cooking spray             | 38                 | 4                  | B           | 4             |
| 26157144 | 5800_Seafood | Whiting, coated, fried, made with cooking spray                        | 38                 | 4                  | B           | 4             |
| 26158031 | 5800_Seafood | Tilapia, coated, fried, made with butter                               | 37                 | 3.5                | D           | 2             |
| 26100260 | 5800_Seafood | Fish stick, patty or nugget from fast food                             | 37                 | 3                  | C           | 4             |
| 26100270 | 5800_Seafood | Fish stick, patty or nugget from restaurant, home, or other place      | 37                 | 3                  | C           | 4             |
| 26137141 | 5800_Seafood | Salmon, coated, fried, made with butter                                | 37                 | 3.5                | D           | 4             |
| 26107142 | 5800_Seafood | Catfish, coated, fried, made with margarine                            | 37                 | 3.5                | C           | 4             |
| 26319144 | 5800_Seafood | Shrimp, coated, fried, made with cooking spray                         | 37                 | 4                  | B           | 4             |
| 26127141 | 5800_Seafood | Perch, coated, fried, made with butter                                 | 36                 | 3.5                | D           | 2             |
| 26157143 | 5800_Seafood | Whiting, coated, fried, made without fat                               | 36                 | 4                  | B           | 4             |
| 26115144 | 5800_Seafood | Flounder, coated, fried, made with cooking spray                       | 36                 | 4                  | B           | 4             |
| 26115141 | 5800_Seafood | Flounder, coated, fried, made with butter                              | 35                 | 3                  | D           | 2             |

| foodcode | level1nd     | Description                                               | Food Compass Score | Health Star Rating | Nutri-Score | NOVA Category |
|----------|--------------|-----------------------------------------------------------|--------------------|--------------------|-------------|---------------|
| 26115143 | 5800_Seafood | Flounder, coated, fried, made without fat                 | 34                 | 4                  | B           | 4             |
| 26303131 | 5800_Seafood | Clams, coated, baked or broiled, fat not added in cooking | 34                 | 4                  | A           | 4             |
| 26319145 | 5800_Seafood | Shrimp, coated, fried, from fast food / restaurant        | 34                 | 1.5                | D           | 4             |
| 26319141 | 5800_Seafood | Shrimp, coated, fried, made with butter                   | 34                 | 3                  | D           | 2             |
| 26107144 | 5800_Seafood | Catfish, coated, fried, made with cooking spray           | 33                 | 3.5                | C           | 4             |
| 26118041 | 5800_Seafood | Halibut, coated, fried, made with butter                  | 33                 | 3.5                | D           | 4             |
| 26151141 | 5800_Seafood | Trout, coated, fried, made with butter                    | 33                 | 2                  | D           | 4             |
| 26109131 | 5800_Seafood | Cod, coated, baked or broiled, made with butter           | 32                 | 3.5                | C           | 4             |
| 26127131 | 5800_Seafood | Perch, coated, baked or broiled, made with butter         | 32                 | 3.5                | C           | 4             |
| 26157131 | 5800_Seafood | Whiting, coated, baked or broiled, made with butter       | 31                 | 3.5                | C           | 4             |
| 26100141 | 5800_Seafood | Fish, NS as to type, coated, fried, made with butter      | 31                 | 3                  | D           | 4             |
| 26115131 | 5800_Seafood | Flounder, coated, baked or broiled, made with butter      | 31                 | 3.5                | C           | 4             |
| 26319161 | 5800_Seafood | Shrimp, coated, baked or broiled, made with butter        | 29                 | 3.5                | C           | 4             |
| 26107131 | 5800_Seafood | Catfish, coated, baked or broiled, made with butter       | 27                 | 3.5                | C           | 4             |
| 27250520 | 5800_Seafood | Seafood restructured                                      | 26                 | 3                  | C           | 4             |
| 26109141 | 5800_Seafood | Cod, coated, fried, made with butter                      | 25                 | 3                  | D           | 4             |
| 26157141 | 5800_Seafood | Whiting, coated, fried, made with butter                  | 25                 | 3.5                | D           | 4             |
| 26107141 | 5800_Seafood | Catfish, coated, fried, made with butter                  | 20                 | 2                  | D           | 4             |

| foodcode | level1nd   | Description                                                                       | Food Compass Score | Health Star Rating | Nutri-Score | NOVA Category |
|----------|------------|-----------------------------------------------------------------------------------|--------------------|--------------------|-------------|---------------|
| 11350030 | 6000_Dairy | Almond milk, unsweetened, chocolate                                               | 91                 | 4                  | A           | 4             |
| 11411300 | 6000_Dairy | Yogurt, nonfat milk, plain                                                        | 91                 | 5                  | A           | 1             |
| 11411420 | 6000_Dairy | Yogurt, Greek, nonfat milk, plain                                                 | 91                 | 5                  | A           | 1             |
| 11400010 | 6000_Dairy | Yogurt, Greek, NS as to type of milk or flavor                                    | 86                 | 5                  | A           | 1             |
| 11411390 | 6000_Dairy | Yogurt, Greek, NS as to type of milk, plain                                       | 86                 | 5                  | A           | 1             |
| 11411410 | 6000_Dairy | Yogurt, Greek, low fat milk, plain                                                | 86                 | 5                  | A           | 1             |
| 11410000 | 6000_Dairy | Yogurt, NS as to type of milk or flavor                                           | 86                 | 5                  | A           | 1             |
| 11400000 | 6000_Dairy | Yogurt, NFS                                                                       | 84                 | 5                  | A           | 1             |
| 11411010 | 6000_Dairy | Yogurt, NS as to type of milk, plain                                              | 83                 | 5                  | A           | 1             |
| 11411200 | 6000_Dairy | Yogurt, low fat milk, plain                                                       | 83                 | 5                  | A           | 1             |
| 11350020 | 6000_Dairy | Almond milk, unsweetened                                                          | 82                 | 4                  | A           | 4             |
| 11411100 | 6000_Dairy | Yogurt, whole milk, plain                                                         | 77                 | 5                  | B           | 1             |
| 11513854 | 6000_Dairy | Chocolate milk, made from sugar free syrup with fat free milk                     | 77                 | 5                  | A           | 3             |
| 11435030 | 6000_Dairy | Yogurt, Greek, nonfat milk, flavors other than fruit                              | 76                 | 5                  | A           | 4             |
| 11513855 | 6000_Dairy | Chocolate milk, made from sugar free syrup with non-dairy milk                    | 76                 | 1.5                | B           | 4             |
| 11411400 | 6000_Dairy | Yogurt, Greek, whole milk, plain                                                  | 75                 | 5                  | A           | 1             |
| 11320100 | 6000_Dairy | Soy milk, light                                                                   | 75                 | 2                  | A           | 4             |
| 11434020 | 6000_Dairy | Yogurt, Greek, nonfat milk, fruit                                                 | 74                 | 5                  | A           | 4             |
| 11513395 | 6000_Dairy | Chocolate milk, made from no sugar added dry mix with non-dairy milk (Nesquik)    | 73                 | 0.5                | B           | 4             |
| 11514360 | 6000_Dairy | Hot chocolate / Cocoa, made with no sugar added dry mix and non-dairy milk        | 70                 | 0.5                | B           | 4             |
| 11446000 | 6000_Dairy | Yogurt parfait, low fat, with fruit                                               | 70                 | 5                  | B           | 4             |
| 11434300 | 6000_Dairy | Yogurt, nonfat milk, flavors other than fruit                                     | 69                 | 5                  | A           | 4             |
| 11513370 | 6000_Dairy | Chocolate milk, made from reduced sugar mix with fat free milk                    | 68                 | 4.5                | A           | 4             |
| 11513394 | 6000_Dairy | Chocolate milk, made from no sugar added dry mix with fat free milk (Nesquik)     | 68                 | 4.5                | A           | 4             |
| 11300100 | 6000_Dairy | Non-dairy milk, NFS                                                               | 68                 | 1.5                | B           | 4             |
| 11320000 | 6000_Dairy | Soy milk                                                                          | 68                 | 1.5                | A           | 4             |
| 11513375 | 6000_Dairy | Chocolate milk, made from reduced sugar mix with non-dairy milk                   | 66                 | 0.5                | B           | 4             |
| 11321100 | 6000_Dairy | Soy milk, light, chocolate                                                        | 65                 | 0.5                | B           | 4             |
| 11321200 | 6000_Dairy | Soy milk, nonfat, chocolate                                                       | 65                 | 0.5                | B           | 4             |
| 11433000 | 6000_Dairy | Yogurt, nonfat milk, fruit                                                        | 65                 | 5                  | B           | 4             |
| 11113000 | 6000_Dairy | Milk, fat free (skim)                                                             | 64                 | 4.5                | A           | 1             |
| 11114320 | 6000_Dairy | Milk, lactose free, fat free (skim)                                               | 64                 | 4.5                | A           | 1             |
| 11111170 | 6000_Dairy | Milk, calcium fortified, fat free (skim)                                          | 62                 | 5                  | A           | 1             |
| 11513853 | 6000_Dairy | Chocolate milk, made from sugar free syrup with low fat milk                      | 62                 | 5                  | A           | 3             |
| 11120000 | 6000_Dairy | Milk, dry, reconstituted, NS as to fat content                                    | 61                 | 4.5                | B           | 1             |
| 11121300 | 6000_Dairy | Milk, dry, reconstituted, fat free (skim)                                         | 61                 | 4.5                | B           | 1             |
| 11434090 | 6000_Dairy | Yogurt, NS as to type of milk, flavors other than fruit                           | 61                 | 5                  | A           | 4             |
| 11434200 | 6000_Dairy | Yogurt, low fat milk, flavors other than fruit                                    | 61                 | 5                  | A           | 4             |
| 11513350 | 6000_Dairy | Chocolate milk, made from reduced sugar mix, NS as to type of milk                | 61                 | 4                  | B           | 3             |
| 11513390 | 6000_Dairy | Chocolate milk, made from no sugar added dry mix, NS as to type of milk (Nesquik) | 61                 | 4                  | B           | 3             |
| 11514350 | 6000_Dairy | Hot chocolate / Cocoa, made with no sugar added dry mix and fat free milk         | 60                 | 4                  | B           | 4             |
| 11513850 | 6000_Dairy | Chocolate milk, made from sugar free syrup, NS as to type of milk                 | 60                 | 4.5                | A           | 2             |
| 11513852 | 6000_Dairy | Chocolate milk, made from sugar free syrup with reduced fat milk                  | 59                 | 4.5                | A           | 2             |
| 11350000 | 6000_Dairy | Almond milk, sweetened                                                            | 59                 | 3.5                | B           | 4             |
| 11321000 | 6000_Dairy | Soy milk, chocolate                                                               | 58                 | 0.5                | B           | 4             |
| 11514310 | 6000_Dairy | Hot chocolate / Cocoa, made with no sugar added dry mix and water                 | 58                 | 4                  | B           | 4             |
| 11513851 | 6000_Dairy | Chocolate milk, made from sugar free syrup with whole milk                        | 56                 | 4                  | B           | 2             |
| 11350010 | 6000_Dairy | Almond milk, sweetened, chocolate                                                 | 56                 | 3                  | B           | 4             |
| 11320200 | 6000_Dairy | Soy milk, nonfat                                                                  | 56                 | 2                  | A           | 4             |
| 11513805 | 6000_Dairy | Chocolate milk, made from light syrup with non-dairy milk                         | 56                 | 0.5                | B           | 4             |
| 11435100 | 6000_Dairy | Yogurt, Greek, with oats                                                          | 55                 | 5                  | A           | 4             |
| 11513310 | 6000_Dairy | Chocolate milk, made from dry mix with non-dairy milk                             | 54                 | 0.5                | B           | 4             |
| 11513385 | 6000_Dairy | Chocolate milk, made from dry mix with non-dairy milk (Nesquik)                   | 54                 | 0.5                | B           | 4             |
| 14109020 | 6000_Dairy | Cheese, Swiss, reduced sodium                                                     | 54                 | 0.5                | C           | 3             |
| 14206010 | 6000_Dairy | Cheese, cottage, lowfat, low sodium                                               | 54                 | 5                  | A           | 3             |
| 11111160 | 6000_Dairy | Milk, calcium fortified, low fat (1%)                                             | 53                 | 4.5                | A           | 1             |
| 11112120 | 6000_Dairy | Milk, acidophilus, low fat (1%)                                                   | 53                 | 4.5                | A           | 1             |
| 11112210 | 6000_Dairy | Milk, low fat (1%)                                                                | 53                 | 4.5                | A           | 1             |
| 11114300 | 6000_Dairy | Milk, lactose free, low fat (1%)                                                  | 53                 | 4.5                | A           | 1             |
| 11212050 | 6000_Dairy | Milk, evaporated, fat free (skim)                                                 | 53                 | 4.5                | A           | 2             |
| 14107040 | 6000_Dairy | Cheese, Mozzarella, reduced sodium                                                | 53                 | 0.5                | C           | 3             |
| 11513365 | 6000_Dairy | Chocolate milk, made from reduced sugar mix with low fat milk                     | 53                 | 4.5                | A           | 4             |
| 11513393 | 6000_Dairy | Chocolate milk, made from no sugar added dry mix with low fat milk (Nesquik)      | 53                 | 4.5                | A           | 4             |
| 11433990 | 6000_Dairy | Yogurt, Greek, NS as to type of milk, fruit                                       | 53                 | 5                  | A           | 4             |
| 11434010 | 6000_Dairy | Yogurt, Greek, low fat milk, fruit                                                | 53                 | 5                  | A           | 4             |
| 11115400 | 6000_Dairy | Kefir, NS as to fat content                                                       | 53                 | 4.5                | A           | 1             |
| 11121210 | 6000_Dairy | Milk, dry, reconstituted, low fat (1%)                                            | 53                 | 4.5                | B           | 1             |
| 14610520 | 6000_Dairy | Cheese with nuts                                                                  | 53                 | 0.5                | D           | 3             |
| 11430000 | 6000_Dairy | Yogurt, NS as to type of milk, fruit                                              | 53                 | 5                  | B           | 4             |
| 11432000 | 6000_Dairy | Yogurt, low fat milk, fruit                                                       | 53                 | 5                  | B           | 4             |
| 11436000 | 6000_Dairy | Yogurt, liquid                                                                    | 52                 | 5                  | B           | 4             |
| 14207010 | 6000_Dairy | Cheese, cottage, lowfat, lactose reduced                                          | 51                 | 5                  | A           | 3             |
| 11435000 | 6000_Dairy | Yogurt, Greek, NS as to type of milk, flavors other than fruit                    | 50                 | 5                  | A           | 4             |
| 11435020 | 6000_Dairy | Yogurt, Greek, low fat milk, flavors other than fruit                             | 50                 | 5                  | A           | 4             |
| 11100000 | 6000_Dairy | Milk, NFS                                                                         | 50                 | 4                  | B           | 1             |
| 11519215 | 6000_Dairy | Strawberry milk, non-dairy                                                        | 50                 | 0.5                | B           | 4             |
| 11513360 | 6000_Dairy | Chocolate milk, made from reduced sugar mix with reduced fat milk                 | 50                 | 4                  | B           | 4             |
| 11513392 | 6000_Dairy | Chocolate milk, made from no sugar added dry mix with reduced fat milk (Nesquik)  | 50                 | 4                  | B           | 4             |
| 11513384 | 6000_Dairy | Chocolate milk, made from dry mix with fat free milk (Nesquik)                    | 50                 | 4                  | B           | 4             |
| 11360000 | 6000_Dairy | Rice milk                                                                         | 50                 | 1                  | B           | 4             |
| 11112110 | 6000_Dairy | Milk, reduced fat (2%)                                                            | 49                 | 4                  | B           | 1             |
| 11112130 | 6000_Dairy | Milk, acidophilus, reduced fat (2%)                                               | 49                 | 4                  | B           | 1             |
| 11114330 | 6000_Dairy | Milk, lactose free, reduced fat (2%)                                              | 49                 | 4                  | B           | 1             |
| 11513300 | 6000_Dairy | Chocolate milk, made from dry mix with fat free milk                              | 49                 | 4                  | B           | 4             |
| 11111100 | 6000_Dairy | Milk, low sodium, whole                                                           | 48                 | 3.5                | B           | 1             |
| 11434100 | 6000_Dairy | Yogurt, whole milk, flavors other than fruit                                      | 48                 | 5                  | B           | 4             |
| 11431000 | 6000_Dairy | Yogurt, whole milk, fruit                                                         | 48                 | 5                  | C           | 4             |
| 11513355 | 6000_Dairy | Chocolate milk, made from reduced sugar mix with whole milk                       | 47                 | 4                  | B           | 4             |
| 11513391 | 6000_Dairy | Chocolate milk, made from no sugar added dry mix with whole milk (Nesquik)        | 47                 | 4                  | B           | 4             |
| 11514340 | 6000_Dairy | Hot chocolate / Cocoa, made with no sugar added dry mix and low fat milk          | 47                 | 4                  | B           | 4             |
| 11111000 | 6000_Dairy | Milk, whole                                                                       | 46                 | 3.5                | B           | 1             |
| 11111150 | 6000_Dairy | Milk, calcium fortified, whole                                                    | 46                 | 3.5                | B           | 1             |
| 11114350 | 6000_Dairy | Milk, lactose free, whole                                                         | 46                 | 3.5                | B           | 1             |
| 14110010 | 6000_Dairy | Cheese, Cheddar, reduced sodium                                                   | 46                 | 0.5                | C           | 3             |
| 11519040 | 6000_Dairy | Strawberry milk, NFS                                                              | 46                 | 4                  | B           | 3             |
| 14502000 | 6000_Dairy | Imitation cheese                                                                  | 46                 | 0.5                | D           | 4             |
| 11211400 | 6000_Dairy | Milk, evaporated, reduced fat (2%)                                                | 46                 | 3.5                | B           | 2             |
| 14109030 | 6000_Dairy | Cheese, Swiss, reduced fat                                                        | 45                 | 5                  | B           | 3             |
| 14410130 | 6000_Dairy | Cheese, American, nonfat or fat free                                              | 45                 | 0.5                | C           | 4             |
| 11513750 | 6000_Dairy | Chocolate milk, made from syrup with non-dairy milk                               | 45                 | 0.5                | B           | 4             |
| 11513804 | 6000_Dairy | Chocolate milk, made from light syrup with fat free milk                          | 45                 | 4                  | B           | 3             |
| 11435010 | 6000_Dairy | Yogurt, Greek, whole milk, flavors other than fruit                               | 44                 | 5                  | B           | 4             |

| foodcode | level1nd   | Description                                                                       | Food Compass Score | Health Star Rating | Nutri-Score | NOVA Category |
|----------|------------|-----------------------------------------------------------------------------------|--------------------|--------------------|-------------|---------------|
| 11514330 | 6000_Dairy | Hot chocolate / Cocoa, made with no sugar added dry mix and reduced fat milk      | 44                 | 3.5                | B           | 4             |
| 11514320 | 6000_Dairy | Hot chocolate / Cocoa, made with no sugar added dry mix and whole milk            | 44                 | 3                  | B           | 4             |
| 11121100 | 6000_Dairy | Milk, dry, reconstituted, whole                                                   | 44                 | 3.5                | B           | 1             |
| 41420380 | 6000_Dairy | Yogurt, soy                                                                       | 43                 | 3.5                | A           | 4             |
| 11513000 | 6000_Dairy | Chocolate milk, made from dry mix, NS as to type of milk                          | 43                 | 3.5                | B           | 3             |
| 14410210 | 6000_Dairy | Cheese, American, reduced sodium                                                  | 43                 | 0.5                | C           | 4             |
| 11513380 | 6000_Dairy | Chocolate milk, made from dry mix, NS as to type of milk (Nesquik)                | 43                 | 3.5                | B           | 3             |
| 11526000 | 6000_Dairy | Milk, malted                                                                      | 42                 | 3.5                | B           | 3             |
| 11116000 | 6000_Dairy | Goat's milk, whole                                                                | 42                 | 4                  | B           | 1             |
| 14109040 | 6000_Dairy | Cheese, Swiss, nonfat or fat free                                                 | 41                 | 4                  | C           | 3             |
| 14200100 | 6000_Dairy | Cheese, cottage, NFS                                                              | 41                 | 5                  | B           | 3             |
| 14204010 | 6000_Dairy | Cheese, cottage, low fat                                                          | 41                 | 5                  | B           | 3             |
| 11434000 | 6000_Dairy | Yogurt, Greek, whole milk, fruit                                                  | 41                 | 5                  | B           | 4             |
| 11514150 | 6000_Dairy | Hot chocolate / Cocoa, made with dry mix and non-dairy milk                       | 41                 | 0.5                | C           | 4             |
| 11115300 | 6000_Dairy | Buttermilk, whole                                                                 | 40                 | 4                  | B           | 1             |
| 11115200 | 6000_Dairy | Buttermilk, reduced fat (2%)                                                      | 40                 | 3.5                | B           | 1             |
| 14107060 | 6000_Dairy | Cheese, Mozzarella, nonfat or fat free                                            | 40                 | 5                  | B           | 3             |
| 11512030 | 6000_Dairy | Hot chocolate / Cocoa, ready to drink, made with non-dairy milk                   | 39                 | 0.5                | C           | 4             |
| 42401010 | 6000_Dairy | Coconut milk, used in cooking                                                     | 38                 | 0.5                | C           | 2             |
| 14201500 | 6000_Dairy | Cheese, Ricotta                                                                   | 38                 | 5                  | C           | 3             |
| 14203010 | 6000_Dairy | Cheese, cottage, dry curd                                                         | 38                 | 5                  | A           | 3             |
| 14107010 | 6000_Dairy | Cheese, Mozzarella, NFS                                                           | 37                 | 0.5                | D           | 3             |
| 14107030 | 6000_Dairy | Cheese, Mozzarella, part skim                                                     | 37                 | 0.5                | D           | 3             |
| 11514140 | 6000_Dairy | Hot chocolate / Cocoa, made with dry mix and fat free milk                        | 37                 | 2.5                | B           | 4             |
| 11511700 | 6000_Dairy | Chocolate milk, ready to drink, low fat, no sugar added (Nesquik)                 | 37                 | 4                  | B           | 4             |
| 14109010 | 6000_Dairy | Cheese, Swiss                                                                     | 37                 | 0.5                | D           | 3             |
| 11115000 | 6000_Dairy | Buttermilk, fat free (skim)                                                       | 37                 | 4                  | B           | 1             |
| 11115100 | 6000_Dairy | Buttermilk, low fat (1%)                                                          | 37                 | 4                  | B           | 1             |
| 14203510 | 6000_Dairy | Puerto Rican white cheese                                                         | 36                 | 3                  | C           | 3             |
| 11513200 | 6000_Dairy | Chocolate milk, made from dry mix with low fat milk                               | 35                 | 4                  | B           | 4             |
| 11513383 | 6000_Dairy | Chocolate milk, made from dry mix with low fat milk (Nesquik)                     | 35                 | 4                  | B           | 4             |
| 11210050 | 6000_Dairy | Milk, evaporated, NS as to fat content                                            | 35                 | 2                  | C           | 2             |
| 11211050 | 6000_Dairy | Milk, evaporated, whole                                                           | 35                 | 2                  | C           | 2             |
| 11513803 | 6000_Dairy | Chocolate milk, made from light syrup with low fat milk                           | 35                 | 4                  | B           | 3             |
| 14104110 | 6000_Dairy | Cheese, Cheddar, reduced fat                                                      | 34                 | 0.5                | D           | 3             |
| 14108420 | 6000_Dairy | Cheese, provolone, reduced fat                                                    | 34                 | 0.5                | D           | 3             |
| 14107250 | 6000_Dairy | Cheese, Muenster, reduced fat                                                     | 34                 | 0.5                | D           | 3             |
| 14204030 | 6000_Dairy | Cheese, cottage, lowfat, with vegetables                                          | 33                 | 5                  | A           | 3             |
| 14203020 | 6000_Dairy | Cheese, cottage, salted, dry curd                                                 | 33                 | 5                  | C           | 3             |
| 11513800 | 6000_Dairy | Chocolate milk, made from light syrup, NS as to type of milk                      | 33                 | 3.5                | B           | 2             |
| 14104400 | 6000_Dairy | Cheese, Feta                                                                      | 33                 | 0.5                | D           | 3             |
| 14120020 | 6000_Dairy | Cheese, Mexican blend, reduced fat                                                | 33                 | 0.5                | D           | 3             |
| 14108060 | 6000_Dairy | Cheese, Parmesan, dry grated, fat free                                            | 32                 | 0.5                | D           | 3             |
| 14610250 | 6000_Dairy | Cheese, cottage cheese, with gelatin dessert and vegetables                       | 32                 | 5                  | B           | 2             |
| 14201010 | 6000_Dairy | Cheese, cottage, creamed, large or small curd                                     | 32                 | 5                  | B           | 3             |
| 11513150 | 6000_Dairy | Chocolate milk, made from dry mix with reduced fat milk                           | 31                 | 3.5                | B           | 4             |
| 11513382 | 6000_Dairy | Chocolate milk, made from dry mix with reduced fat milk (Nesquik)                 | 31                 | 3.5                | B           | 4             |
| 11541110 | 6000_Dairy | Milk shake, home recipe, chocolate                                                | 31                 | 2                  | C           | 3             |
| 14204020 | 6000_Dairy | Cheese, cottage, lowfat, with fruit                                               | 31                 | 5                  | A           | 4             |
| 11541135 | 6000_Dairy | Milk shake, home recipe, flavors other than chocolate, light                      | 31                 | 3                  | B           | 3             |
| 11513802 | 6000_Dairy | Chocolate milk, made from light syrup with reduced fat milk                       | 31                 | 3.5                | B           | 3             |
| 11519205 | 6000_Dairy | Strawberry milk, fat free                                                         | 31                 | 3.5                | B           | 4             |
| 14410380 | 6000_Dairy | Cheese, processed cream cheese product, nonfat or fat free                        | 31                 | 4                  | C           | 4             |
| 14104115 | 6000_Dairy | Cheese, Cheddar, nonfat or fat free                                               | 31                 | 4.5                | C           | 3             |
| 11541130 | 6000_Dairy | Milk shake, home recipe, chocolate, light                                         | 31                 | 2.5                | C           | 3             |
| 11513801 | 6000_Dairy | Chocolate milk, made from light syrup with whole milk                             | 30                 | 3.5                | B           | 3             |
| 14010000 | 6000_Dairy | Cheese, NFS                                                                       | 30                 | 0.5                | E           | 3             |
| 14103010 | 6000_Dairy | Cheese, Camembert                                                                 | 30                 | 0.5                | D           | 3             |
| 11541120 | 6000_Dairy | Milk shake, home recipe, flavors other than chocolate                             | 30                 | 2                  | C           | 3             |
| 11511400 | 6000_Dairy | Chocolate milk, ready to drink, low fat                                           | 30                 | 4                  | B           | 4             |
| 14105010 | 6000_Dairy | Cheese, Gouda or Edam                                                             | 29                 | 0.5                | D           | 3             |
| 14108015 | 6000_Dairy | Cheese, Parmesan, dry grated, reduced fat                                         | 29                 | 0.5                | D           | 3             |
| 11511600 | 6000_Dairy | Chocolate milk, ready to drink, low fat (Nesquik)                                 | 29                 | 4                  | B           | 4             |
| 11513100 | 6000_Dairy | Chocolate milk, made from dry mix with whole milk                                 | 29                 | 3                  | B           | 4             |
| 11513381 | 6000_Dairy | Chocolate milk, made from dry mix with whole milk (Nesquik)                       | 29                 | 3                  | B           | 4             |
| 11511200 | 6000_Dairy | Chocolate milk, ready to drink, reduced fat                                       | 29                 | 3                  | B           | 4             |
| 14133000 | 6000_Dairy | Queso Fresco                                                                      | 29                 | 0.5                | D           | 3             |
| 14120010 | 6000_Dairy | Cheese, Mexican blend                                                             | 29                 | 0.5                | D           | 3             |
| 14107020 | 6000_Dairy | Cheese, Mozzarella, whole milk                                                    | 29                 | 0.5                | D           | 3             |
| 14134000 | 6000_Dairy | Queso cotija                                                                      | 28                 | 0.5                | E           | 3             |
| 14108020 | 6000_Dairy | Cheese, Parmesan, hard                                                            | 28                 | 0.5                | E           | 3             |
| 14108010 | 6000_Dairy | Cheese, Parmesan, dry grated                                                      | 28                 | 0.5                | E           | 3             |
| 14105200 | 6000_Dairy | Cheese, Gruyere                                                                   | 28                 | 0.5                | D           | 3             |
| 14102010 | 6000_Dairy | Cheese, Brick                                                                     | 28                 | 0.5                | D           | 3             |
| 11511550 | 6000_Dairy | Chocolate milk, ready to drink, reduced sugar, NS as to milk                      | 28                 | 4.5                | A           | 4             |
| 14202010 | 6000_Dairy | Cheese, cottage, with fruit                                                       | 28                 | 5                  | B           | 4             |
| 14107200 | 6000_Dairy | Cheese, Muenster                                                                  | 28                 | 0.5                | D           | 3             |
| 14106500 | 6000_Dairy | Cheese, Monterey, reduced fat                                                     | 28                 | 0.5                | D           | 3             |
| 14108400 | 6000_Dairy | Cheese, Provolone                                                                 | 27                 | 0.5                | D           | 3             |
| 14108200 | 6000_Dairy | Cheese, Port du Salut                                                             | 27                 | 0.5                | D           | 3             |
| 14104700 | 6000_Dairy | Cheese, goat                                                                      | 27                 | 0.5                | D           | 3             |
| 14660200 | 6000_Dairy | Mozzarella sticks, breaded, baked, or fried                                       | 27                 | 0.5                | D           | 3             |
| 14202020 | 6000_Dairy | Cheese, cottage, with vegetables                                                  | 27                 | 5                  | B           | 4             |
| 11511100 | 6000_Dairy | Chocolate milk, ready to drink, whole                                             | 27                 | 2                  | C           | 4             |
| 14103020 | 6000_Dairy | Cheese, Brie                                                                      | 26                 | 0.5                | D           | 3             |
| 14410120 | 6000_Dairy | Cheese, American, reduced fat                                                     | 26                 | 0.5                | D           | 4             |
| 14410330 | 6000_Dairy | Cheese spread, American or Cheddar cheese base, reduced fat                       | 26                 | 0.5                | D           | 4             |
| 14101010 | 6000_Dairy | Cheese, Blue or Roquefort                                                         | 26                 | 0.5                | E           | 3             |
| 14106010 | 6000_Dairy | Cheese, Limburger                                                                 | 26                 | 0.5                | D           | 3             |
| 14104100 | 6000_Dairy | Cheese, Cheddar                                                                   | 26                 | 0.5                | D           | 3             |
| 14201200 | 6000_Dairy | Cottage cheese, farmer's                                                          | 25                 | 5                  | C           | 3             |
| 14104200 | 6000_Dairy | Cheese, Colby                                                                     | 25                 | 0.5                | D           | 3             |
| 11513400 | 6000_Dairy | Chocolate milk, made from syrup, NS as to type of milk                            | 25                 | 3                  | B           | 3             |
| 14104600 | 6000_Dairy | Cheese, Fontina                                                                   | 25                 | 0.5                | D           | 3             |
| 11560000 | 6000_Dairy | Chocolate milk drink                                                              | 25                 | 3                  | B           | 4             |
| 14410110 | 6000_Dairy | Cheese, American                                                                  | 25                 | 0.5                | E           | 4             |
| 11514130 | 6000_Dairy | Hot chocolate / Cocoa, made with dry mix and low fat milk                         | 25                 | 2.5                | B           | 4             |
| 14104250 | 6000_Dairy | Cheese, Colby Jack                                                                | 25                 | 0.5                | D           | 3             |
| 14106200 | 6000_Dairy | Cheese, Monterey                                                                  | 25                 | 0.5                | D           | 3             |
| 11513700 | 6000_Dairy | Chocolate milk, made from syrup with fat free milk                                | 24                 | 3.5                | B           | 4             |
| 11512120 | 6000_Dairy | Hot chocolate / Cocoa, ready to drink, made with non-dairy milk and whipped cream | 24                 | 0.5                | C           | 4             |
| 11513500 | 6000_Dairy | Chocolate milk, made from syrup with whole milk                                   | 23                 | 2.5                | C           | 3             |

| foodcode | level1nd   | Description                                                                    | Food Compass Score | Health Star Rating | Nutri-Score | NOVA Category |
|----------|------------|--------------------------------------------------------------------------------|--------------------|--------------------|-------------|---------------|
| 14131500 | 6000_Dairy | Queso Asadero                                                                  | 23                 | 0.5                | D           | 3             |
| 11514120 | 6000_Dairy | Hot chocolate / Cocoa, made with dry mix and reduced fat milk                  | 23                 | 2                  | C           | 4             |
| 11340000 | 6000_Dairy | Imitation milk, non-soy, sweetened                                             | 23                 | 1                  | B           | 4             |
| 14132000 | 6000_Dairy | Queso Chihuahua                                                                | 23                 | 0.5                | D           | 3             |
| 11542100 | 6000_Dairy | Milk shake, fast food, chocolate                                               | 22                 | 1                  | C           | 4             |
| 11543000 | 6000_Dairy | Milk shake, bottled, chocolate                                                 | 22                 | 1                  | C           | 4             |
| 14131000 | 6000_Dairy | Queso Anejo, aged Mexican cheese                                               | 22                 | 0.5                | E           | 3             |
| 11519200 | 6000_Dairy | Strawberry milk, low fat                                                       | 22                 | 3.5                | B           | 4             |
| 11531500 | 6000_Dairy | Eggnog, lowfat / light                                                         | 22                 | 4                  | B           | 4             |
| 11514110 | 6000_Dairy | Hot chocolate / Cocoa, made with dry mix and whole milk                        | 21                 | 2                  | C           | 4             |
| 11511610 | 6000_Dairy | Chocolate milk, ready to drink, fat free (Nesquik)                             | 21                 | 3.5                | B           | 4             |
| 11511000 | 6000_Dairy | Chocolate milk, NFS                                                            | 21                 | 3.5                | B           | 4             |
| 11511300 | 6000_Dairy | Chocolate milk, ready to drink, fat free                                       | 21                 | 3.5                | B           | 4             |
| 11512020 | 6000_Dairy | Hot chocolate / Cocoa, ready to drink, made with nonfat milk                   | 19                 | 3                  | B           | 4             |
| 11514100 | 6000_Dairy | Hot chocolate / Cocoa, made with dry mix and water                             | 19                 | 3                  | B           | 4             |
| 14410620 | 6000_Dairy | Cheese, with wine                                                              | 19                 | 0.5                | E           | 4             |
| 11543010 | 6000_Dairy | Milk shake, bottled, flavors other than chocolate                              | 18                 | 1.5                | C           | 4             |
| 11519105 | 6000_Dairy | Strawberry milk, reduced fat                                                   | 18                 | 3                  | B           | 4             |
| 14410500 | 6000_Dairy | Cheese, processed cheese food                                                  | 18                 | 0.5                | E           | 4             |
| 11542200 | 6000_Dairy | Milk shake, fast food, flavors other than chocolate                            | 18                 | 1.5                | C           | 4             |
| 11541400 | 6000_Dairy | Milk shake with malt                                                           | 18                 | 2                  | C           | 4             |
| 11531000 | 6000_Dairy | Eggnog, regular                                                                | 18                 | 3                  | B           | 4             |
| 14410100 | 6000_Dairy | Cheese, American and Swiss blends                                              | 18                 | 0.5                | E           | 4             |
| 11513600 | 6000_Dairy | Chocolate milk, made from syrup with low fat milk                              | 16                 | 3.5                | B           | 4             |
| 11519050 | 6000_Dairy | Strawberry milk, whole                                                         | 16                 | 2.5                | C           | 4             |
| 14420100 | 6000_Dairy | Cheese spread, American or Cheddar cheese base                                 | 16                 | 0.5                | E           | 4             |
| 14420160 | 6000_Dairy | Cheese spread, Swiss cheese base                                               | 16                 | 0.5                | E           | 4             |
| 14420300 | 6000_Dairy | Cheese spread, pressurized can                                                 | 16                 | 0.5                | E           | 4             |
| 14410600 | 6000_Dairy | Cheese, processed, with vegetables                                             | 15                 | 0.5                | E           | 4             |
| 14610200 | 6000_Dairy | Cheese, cottage cheese, with gelatin dessert                                   | 14                 | 5                  | B           | 3             |
| 11513550 | 6000_Dairy | Chocolate milk, made from syrup with reduced fat milk                          | 14                 | 3                  | B           | 4             |
| 11220000 | 6000_Dairy | Milk, condensed, sweetened                                                     | 13                 | 0.5                | E           | 3             |
| 11512110 | 6000_Dairy | Hot chocolate / Cocoa, ready to drink, made with nonfat milk and whipped cream | 11                 | 2                  | C           | 4             |
| 42402010 | 6000_Dairy | Coconut cream, canned, sweetened                                               | 10                 | 0.5                | E           | 3             |
| 11512010 | 6000_Dairy | Hot chocolate / Cocoa, ready to drink                                          | 9                  | 2                  | C           | 4             |
| 42401100 | 6000_Dairy | Yogurt, coconut milk                                                           | 9                  | 5                  | C           | 4             |
| 11512100 | 6000_Dairy | Hot chocolate / Cocoa, ready to drink, with whipped cream                      | 8                  | 1.5                | C           | 4             |
| 14610210 | 6000_Dairy | Cheese, cottage cheese, with gelatin dessert and fruit                         | 7                  | 5                  | B           | 4             |
| 13120810 | 6000_Dairy | Ice cream soda, chocolate                                                      | 4                  | 1.5                | C           | 4             |
| 13120800 | 6000_Dairy | Ice cream soda, flavors other than chocolate                                   | 2                  | 1.5                | C           | 4             |
| 11370000 | 6000_Dairy | Coconut milk                                                                   | 2                  | 2                  | B           | 4             |



| foodcode | level1nd       | Description                                                                          | Food Compass Score | Health Star Rating | Nutri-Score | NOVA Category |
|----------|----------------|--------------------------------------------------------------------------------------|--------------------|--------------------|-------------|---------------|
| 82105800 | 7000_Fats Oils | Canola, soybean and sunflower oil                                                    | 86                 | 3.5                | D           | 2             |
| 82105750 | 7000_Fats Oils | Canola and soybean oil                                                               | 86                 | 3.5                | D           | 2             |
| 82105500 | 7000_Fats Oils | Rapeseed oil                                                                         | 85                 | 4                  | C           | 2             |
| 82101000 | 7000_Fats Oils | Vegetable oil, NFS                                                                   | 85                 | 3                  | D           | 2             |
| 82103500 | 7000_Fats Oils | Flaxseed oil                                                                         | 84                 | 4                  | C           | 2             |
| 82108700 | 7000_Fats Oils | Walnut oil                                                                           | 84                 | 4                  | C           | 2             |
| 82108250 | 7000_Fats Oils | Soybean and sunflower oil                                                            | 84                 | 3.5                | D           | 2             |
| 82108000 | 7000_Fats Oils | Soybean oil                                                                          | 82                 | 3                  | D           | 2             |
| 82104000 | 7000_Fats Oils | Olive oil                                                                            | 81                 | 3                  | D           | 2             |
| 82106000 | 7000_Fats Oils | Safflower oil                                                                        | 81                 | 4                  | C           | 2             |
| 82101300 | 7000_Fats Oils | Almond oil                                                                           | 81                 | 4                  | C           | 2             |
| 82108500 | 7000_Fats Oils | Sunflower oil                                                                        | 81                 | 3.5                | D           | 2             |
| 82102000 | 7000_Fats Oils | Corn oil                                                                             | 81                 | 3.5                | D           | 2             |
| 82107000 | 7000_Fats Oils | Sesame oil                                                                           | 78                 | 3                  | D           | 2             |
| 82109000 | 7000_Fats Oils | Wheat germ oil                                                                       | 76                 | 2.5                | D           | 2             |
| 82105000 | 7000_Fats Oils | Peanut oil                                                                           | 73                 | 3                  | D           | 2             |
| 82103000 | 7000_Fats Oils | Cottonseed oil                                                                       | 60                 | 1.5                | D           | 2             |
| 81103030 | 7000_Fats Oils | Margarine, stick, unsalted                                                           | 55                 | 3.5                | C           | 4             |
| 83208500 | 7000_Fats Oils | Korean dressing or marinade                                                          | 47                 | 0.5                | D           | 2             |
| 83101600 | 7000_Fats Oils | Bacon and tomato dressing                                                            | 47                 | 5                  | D           | 4             |
| 83112500 | 7000_Fats Oils | Creamy dressing                                                                      | 46                 | 1                  | D           | 4             |
| 83100100 | 7000_Fats Oils | Salad dressing, NFS, for salads                                                      | 46                 | 1                  | D           | 4             |
| 81102000 | 7000_Fats Oils | Margarine, NFS                                                                       | 44                 | 3                  | D           | 4             |
| 81103080 | 7000_Fats Oils | Margarine-like spread, tub, salted                                                   | 44                 | 3                  | D           | 4             |
| 81200100 | 7000_Fats Oils | Oil or table fat, NFS                                                                | 44                 | 1.5                | D           | 2             |
| 81103130 | 7000_Fats Oils | Margarine like spread, whipped, tub, salted                                          | 44                 | 3                  | D           | 4             |
| 83114000 | 7000_Fats Oils | Thousand Island dressing                                                             | 43                 | 1.5                | D           | 4             |
| 83112000 | 7000_Fats Oils | Avocado dressing                                                                     | 43                 | 4                  | D           | 4             |
| 83112990 | 7000_Fats Oils | Sesame dressing                                                                      | 40                 | 3.5                | D           | 4             |
| 81104011 | 7000_Fats Oils | Margarine like spread, reduced calorie, about 40% fat, made with yogurt, tub, salted | 39                 | 4.5                | D           | 4             |
| 81104010 | 7000_Fats Oils | Margarine-like spread, reduced calorie, about 40% fat, tub, salted                   | 38                 | 4                  | D           | 4             |
| 81104020 | 7000_Fats Oils | Margarine-like spread, reduced calorie, about 40% fat, stick, salted                 | 38                 | 4                  | D           | 4             |
| 81102020 | 7000_Fats Oils | Margarine, tub, salted                                                               | 37                 | 2.5                | D           | 4             |
| 81103020 | 7000_Fats Oils | Margarine, whipped, tub, salted                                                      | 37                 | 2.5                | D           | 4             |
| 83101000 | 7000_Fats Oils | Blue or roquefort cheese dressing                                                    | 37                 | 1                  | D           | 4             |
| 81103090 | 7000_Fats Oils | Margarine-like spread, liquid, salted                                                | 37                 | 3.5                | D           | 4             |
| 83102000 | 7000_Fats Oils | Caesar dressing                                                                      | 35                 | 0.5                | D           | 4             |
| 81103040 | 7000_Fats Oils | Margarine-like spread, stick, salted                                                 | 35                 | 3                  | D           | 4             |
| 81104500 | 7000_Fats Oils | Vegetable oil-butter spread, stick, salted                                           | 34                 | 3                  | D           | 4             |
| 83104000 | 7000_Fats Oils | French or Catalina dressing                                                          | 34                 | 1                  | D           | 4             |
| 83109000 | 7000_Fats Oils | Russian dressing                                                                     | 33                 | 1.5                | D           | 4             |
| 81102010 | 7000_Fats Oils | Margarine, stick, salted                                                             | 32                 | 2                  | D           | 4             |
| 81104110 | 7000_Fats Oils | Margarine like spread, fat free, liquid, salted                                      | 32                 | 5                  | C           | 4             |
| 81104510 | 7000_Fats Oils | Vegetable oil-butter spread, tub, salted                                             | 32                 | 4                  | D           | 4             |
| 81104050 | 7000_Fats Oils | Margarine like spread, reduced calorie, about 20% fat, tub, salted                   | 31                 | 5                  | D           | 4             |
| 83103000 | 7000_Fats Oils | Coleslaw dressing                                                                    | 29                 | 1.5                | D           | 4             |
| 83106000 | 7000_Fats Oils | Italian dressing, made with vinegar and oil                                          | 29                 | 1.5                | D           | 4             |
| 83202020 | 7000_Fats Oils | French or Catalina dressing, light                                                   | 28                 | 3                  | D           | 4             |
| 12310100 | 7000_Fats Oils | Sour cream                                                                           | 28                 | 2.5                | C           | 2             |
| 12100100 | 7000_Fats Oils | Cream, NS as to light, heavy, or half and half                                       | 27                 | 2.5                | D           | 2             |
| 12120100 | 7000_Fats Oils | Cream, half and half                                                                 | 27                 | 2.5                | D           | 2             |
| 83105500 | 7000_Fats Oils | Honey mustard dressing                                                               | 26                 | 1.5                | D           | 4             |
| 83112950 | 7000_Fats Oils | Poppy seed dressing                                                                  | 26                 | 0.5                | E           | 4             |
| 83200100 | 7000_Fats Oils | Salad dressing, light, NFS                                                           | 26                 | 2                  | D           | 4             |
| 83210100 | 7000_Fats Oils | Creamy dressing, light                                                               | 26                 | 2                  | D           | 4             |
| 81105020 | 7000_Fats Oils | Butter-margarine blend, tub, salted                                                  | 25                 | 2.5                | D           | 4             |
| 81105500 | 7000_Fats Oils | Butter-vegetable oil blend                                                           | 25                 | 2.5                | D           | 4             |
| 81104550 | 7000_Fats Oils | Vegetable oil-butter spread, reduced calorie, stick, salted                          | 25                 | 2.5                | D           | 4             |
| 81203000 | 7000_Fats Oils | Shortening, NS as to vegetable or animal                                             | 25                 | 1.5                | D           | 4             |
| 81203100 | 7000_Fats Oils | Shortening, vegetable                                                                | 25                 | 1.5                | D           | 4             |
| 83204500 | 7000_Fats Oils | Honey mustard dressing, light                                                        | 25                 | 2                  | D           | 4             |
| 12110100 | 7000_Fats Oils | Cream, light                                                                         | 25                 | 2.5                | C           | 2             |
| 12120110 | 7000_Fats Oils | Cream, half and half, fat free                                                       | 24                 | 3.5                | D           | 4             |
| 83206500 | 7000_Fats Oils | Sesame dressing, light                                                               | 23                 | 2                  | D           | 4             |
| 83205450 | 7000_Fats Oils | Italian dressing, light                                                              | 23                 | 2                  | D           | 4             |
| 81104560 | 7000_Fats Oils | Vegetable oil-butter spread, reduced calorie, tub, salted                            | 23                 | 3                  | D           | 4             |
| 83207000 | 7000_Fats Oils | Thousand Island dressing, light                                                      | 22                 | 2.5                | D           | 4             |
| 83201000 | 7000_Fats Oils | Blue or roquefort cheese dressing, light                                             | 22                 | 2                  | D           | 4             |
| 14303010 | 7000_Fats Oils | Cheese, cream, light or lite                                                         | 21                 | 2                  | D           | 3             |
| 12310370 | 7000_Fats Oils | Sour cream, fat free                                                                 | 20                 | 3.5                | B           | 4             |
| 81100000 | 7000_Fats Oils | Table fat, NFS                                                                       | 18                 | 0.5                | E           | 3             |
| 81202000 | 7000_Fats Oils | Lard                                                                                 | 17                 | 1                  | D           | 2             |
| 81203200 | 7000_Fats Oils | Shortening, animal                                                                   | 17                 | 1                  | D           | 2             |
| 83201400 | 7000_Fats Oils | Coleslaw dressing, light                                                             | 16                 | 0.5                | E           | 4             |
| 12310350 | 7000_Fats Oils | Sour cream, light                                                                    | 16                 | 3                  | C           | 4             |
| 12210280 | 7000_Fats Oils | Coffee creamer, liquid, fat free, sugar free, flavored                               | 16                 | 3.5                | C           | 4             |
| 12210310 | 7000_Fats Oils | Coffee creamer, liquid, sugar free, flavored                                         | 16                 | 3.5                | C           | 4             |
| 83300600 | 7000_Fats Oils | Italian dressing, fat free                                                           | 16                 | 2                  | D           | 4             |
| 12310300 | 7000_Fats Oils | Sour cream, reduced fat                                                              | 16                 | 3                  | D           | 4             |
| 12120106 | 7000_Fats Oils | Cream, half and half, flavored                                                       | 15                 | 3                  | D           | 4             |
| 12210210 | 7000_Fats Oils | Coffee creamer, liquid, flavored                                                     | 15                 | 2                  | D           | 4             |
| 12130100 | 7000_Fats Oils | Cream, heavy                                                                         | 14                 | 1                  | D           | 4             |
| 12310200 | 7000_Fats Oils | Sour cream, half and half                                                            | 13                 | 2.5                | C           | 4             |
| 83115000 | 7000_Fats Oils | Yogurt dressing                                                                      | 12                 | 2                  | D           | 4             |
| 14301010 | 7000_Fats Oils | Cheese, cream                                                                        | 12                 | 1                  | D           | 3             |
| 83206000 | 7000_Fats Oils | Russian dressing, light                                                              | 11                 | 2                  | D           | 4             |
| 14420210 | 7000_Fats Oils | Cheese spread, cream cheese, light or lite                                           | 10                 | 2                  | D           | 4             |
| 83300100 | 7000_Fats Oils | Blue or roquefort cheese dressing, fat free                                          | 10                 | 2.5                | D           | 4             |
| 22621100 | 7000_Fats Oils | Fat back, cooked                                                                     | 10                 | 0.5                | E           | 1             |
| 81201000 | 7000_Fats Oils | Animal fat or drippings                                                              | 9                  | 0.5                | E           | 2             |
| 81105010 | 7000_Fats Oils | Butter-margarine blend, stick, salted                                                | 9                  | 0.5                | E           | 4             |
| 81104100 | 7000_Fats Oils | Margarine like spread, fat free, tub, salted                                         | 9                  | 5                  | D           | 4             |
| 83300800 | 7000_Fats Oils | Russian dressing, fat free                                                           | 9                  | 3.5                | C           | 4             |
| 83301000 | 7000_Fats Oils | Thousand Island dressing, fat free                                                   | 9                  | 3.5                | C           | 4             |
| 12200100 | 7000_Fats Oils | Coffee creamer, NFS                                                                  | 8                  | 3                  | C           | 4             |
| 12210200 | 7000_Fats Oils | Coffee creamer, liquid                                                               | 8                  | 3                  | C           | 4             |
| 12210520 | 7000_Fats Oils | Coffee creamer, soy, liquid                                                          | 8                  | 3                  | C           | 4             |
| 83203000 | 7000_Fats Oils | Caesar dressing, light                                                               | 8                  | 1.5                | D           | 4             |
| 12140000 | 7000_Fats Oils | Cream, whipped                                                                       | 8                  | 1                  | D           | 4             |
| 12210260 | 7000_Fats Oils | Coffee creamer, liquid, fat free                                                     | 7                  | 3.5                | C           | 4             |
| 12210505 | 7000_Fats Oils | Coffee creamer, powder, sugar free, flavored                                         | 7                  | 1                  | D           | 4             |
| 81101100 | 7000_Fats Oils | Butter, stick, unsalted                                                              | 6                  | 1                  | D           | 2             |
| 81101110 | 7000_Fats Oils | Butter, whipped, tub, unsalted                                                       | 6                  | 1                  | D           | 2             |
| 81101120 | 7000_Fats Oils | Butter, whipped, stick, unsalted                                                     | 6                  | 1                  | D           | 2             |

| foodcode | level1nd       | Description                                | Food Compass Score | Health Star Rating | Nutri-Score | NOVA Category |
|----------|----------------|--------------------------------------------|--------------------|--------------------|-------------|---------------|
| 81204000 | 7000_Fats Oils | Ghee, clarified butter                     | 5                  | 1                  | E           | 2             |
| 12320100 | 7000_Fats Oils | Sour cream, imitation                      | 5                  | 1.5                | D           | 4             |
| 12220280 | 7000_Fats Oils | Whipped topping, sugar free                | 4                  | 1.5                | D           | 4             |
| 12210400 | 7000_Fats Oils | Coffee creamer, powder                     | 4                  | 1                  | D           | 4             |
| 81100500 | 7000_Fats Oils | Butter, NFS                                | 3                  | 0.5                | E           | 2             |
| 81101000 | 7000_Fats Oils | Butter, stick, salted                      | 3                  | 0.5                | E           | 2             |
| 81101020 | 7000_Fats Oils | Butter, whipped, stick, salted             | 3                  | 0.5                | E           | 2             |
| 12210430 | 7000_Fats Oils | Coffee creamer, powder, fat free           | 3                  | 0.5                | E           | 4             |
| 12210440 | 7000_Fats Oils | Coffee creamer, powder, fat free, flavored | 3                  | 0.5                | E           | 4             |
| 81101010 | 7000_Fats Oils | Butter, whipped, tub, salted               | 3                  | 0.5                | E           | 2             |
| 82101500 | 7000_Fats Oils | Coconut oil                                | 2                  | 1                  | E           | 2             |
| 12210270 | 7000_Fats Oils | Coffee creamer, liquid, fat free, flavored | 1                  | 2.5                | D           | 4             |
| 12210420 | 7000_Fats Oils | Coffee creamer, powder, flavored           | 1                  | 0.5                | E           | 4             |
| 12220200 | 7000_Fats Oils | Whipped topping                            | 1                  | 0.5                | D           | 4             |
| 12220270 | 7000_Fats Oils | Whipped topping, fat free                  | 1                  | 1.5                | D           | 4             |
| 14420200 | 7000_Fats Oils | Cheese spread, cream cheese, regular       | 1                  | 1                  | D           | 4             |
| 81101500 | 7000_Fats Oils | Light butter, stick, salted                | 1                  | 1                  | E           | 4             |
| 81101520 | 7000_Fats Oils | Light butter, whipped, tub, salted         | 1                  | 1                  | E           | 4             |
| 81106010 | 7000_Fats Oils | Butter replacement, fat-free powder        | 1                  | 4                  | E           | 4             |
| 81322000 | 7000_Fats Oils | Honey butter                               | 1                  | 1.5                | E           | 2             |
| 83300200 | 7000_Fats Oils | Caesar dressing, fat free                  | 1                  | 1.5                | D           | 4             |
| 83300300 | 7000_Fats Oils | Creamy dressing, fat free                  | 1                  | 2.5                | D           | 4             |
| 83300400 | 7000_Fats Oils | French or Catalina dressing, fat free      | 1                  | 2.5                | D           | 4             |
| 83300500 | 7000_Fats Oils | Honey mustard dressing, fat free           | 1                  | 1.5                | D           | 4             |
| 83300900 | 7000_Fats Oils | Salad dressing, fat free, NFS              | 1                  | 2.5                | D           | 4             |

| foodcode | level1nd   | Description                                                                                                                        | Food Compass Score | Health Star Rating | Nutri-Score | NOVA Category |
|----------|------------|------------------------------------------------------------------------------------------------------------------------------------|--------------------|--------------------|-------------|---------------|
| 27151030 | 8000_Mixed | Ceviche                                                                                                                            | 100                | 4.5                | A           | 1             |
| 27151070 | 8000_Mixed | Stewed codfish, no potatoes, Puerto Rican style                                                                                    | 100                | 4.5                | A           | 2             |
| 27351030 | 8000_Mixed | Stewed codfish, Puerto Rican style                                                                                                 | 100                | 5                  | A           | 2             |
| 27450180 | 8000_Mixed | Seafood garden salad with seafood, lettuce, vegetables excluding tomato and carrots, no dressing                                   | 100                | 5                  | A           | 2             |
| 27450190 | 8000_Mixed | Seafood garden salad with seafood, lettuce, tomato and/or carrots, other vegetables, no dressing                                   | 100                | 5                  | A           | 2             |
| 27450200 | 8000_Mixed | Seafood garden salad with seafood, lettuce, eggs, vegetables excluding tomato and carrots, no dressing                             | 100                | 4.5                | A           | 2             |
| 27450310 | 8000_Mixed | Lomi salmon                                                                                                                        | 100                | 5                  | A           | 2             |
| 27450400 | 8000_Mixed | Shrimp and vegetables including carrots, broccoli, and/or dark-green leafy; no potatoes, no sauce                                  | 100                | 4.5                | A           | 2             |
| 27450740 | 8000_Mixed | Fish and vegetables including carrots, broccoli, and/or dark-green leafy; no potatoes, soy-based sauce                             | 100                | 4.5                | A           | 2             |
| 72125500 | 8000_Mixed | Channa Saag                                                                                                                        | 100                | 4.5                | A           | 2             |
| 75146000 | 8000_Mixed | Greek Salad, no dressing                                                                                                           | 100                | 4.5                | A           | 3             |
| 75440300 | 8000_Mixed | Vegetable combinations, including carrots, broccoli, and/or dark-green leafy; cooked, with tomato sauce                            | 100                | 4.5                | A           | 1             |
| 75440600 | 8000_Mixed | Vegetable curry                                                                                                                    | 100                | 5                  | A           | 2             |
| 75604600 | 8000_Mixed | Gazpacho                                                                                                                           | 99                 | 4.5                | B           | 2             |
| 72125253 | 8000_Mixed | Spinach, cooked, from canned, with cheese sauce                                                                                    | 99                 | 4                  | B           | 1             |
| 72307000 | 8000_Mixed | Spinach soup                                                                                                                       | 99                 | 4                  | A           | 1             |
| 27450210 | 8000_Mixed | Seafood garden salad with seafood, lettuce, eggs, tomato and/or carrots, other vegetables, no dressing                             | 98                 | 4.5                | A           | 2             |
| 27451060 | 8000_Mixed | Octopus salad, Puerto Rican style                                                                                                  | 98                 | 4.5                | A           | 2             |
| 27450760 | 8000_Mixed | Fish shish kabob with vegetables, excluding potatoes                                                                               | 98                 | 4.5                | A           | 2             |
| 27450600 | 8000_Mixed | Shellfish mixture and vegetables including carrots, broccoli, and/or dark-green leafy; no potatoes, soy-based sauce                | 97                 | 4.5                | A           | 2             |
| 27450750 | 8000_Mixed | Fish and vegetables excluding carrots, broccoli, and dark-green leafy; no potatoes, soy-based sauce                                | 97                 | 4                  | A           | 2             |
| 27450410 | 8000_Mixed | Shrimp and vegetables including carrots, broccoli, and/or dark-green leafy; no potatoes, soy-based sauce                           | 97                 | 4.5                | A           | 2             |
| 75147000 | 8000_Mixed | Spinach salad, no dressing                                                                                                         | 97                 | 4.5                | A           | 2             |
| 27150320 | 8000_Mixed | Fish curry                                                                                                                         | 97                 | 4.5                | A           | 2             |
| 27450110 | 8000_Mixed | Shrimp garden salad, shrimp, lettuce, eggs, tomato and/or carrots, other vegetables, no dressing                                   | 96                 | 4.5                | A           | 1             |
| 27150100 | 8000_Mixed | Shrimp curry                                                                                                                       | 95                 | 5                  | A           | 2             |
| 75306010 | 8000_Mixed | Eggplant in tomato sauce, cooked, fat not added in cooking                                                                         | 95                 | 4.5                | A           | 2             |
| 27450120 | 8000_Mixed | Shrimp garden salad, shrimp, lettuce, eggs, vegetables excluding tomato and carrots, no dressing                                   | 95                 | 4.5                | A           | 1             |
| 27450700 | 8000_Mixed | Fish and vegetables including carrots, broccoli, and/or dark-green leafy; no potatoes, tomato-based sauce                          | 95                 | 4.5                | B           | 2             |
| 73111400 | 8000_Mixed | Carrots in tomato sauce                                                                                                            | 94                 | 4.5                | A           | 2             |
| 27450405 | 8000_Mixed | Shrimp and vegetables excluding carrots, broccoli, and dark-green leafy; no potatoes, no sauce                                     | 94                 | 4.5                | A           | 2             |
| 27150330 | 8000_Mixed | Mussels with tomato-based sauce                                                                                                    | 94                 | 4                  | B           | 1             |
| 72125251 | 8000_Mixed | Spinach, cooked, from fresh, with cheese sauce                                                                                     | 94                 | 4                  | A           | 3             |
| 27446355 | 8000_Mixed | Asian chicken or turkey garden salad with crispy noodles, chicken and/or turkey, lettuce, fruit, nuts, crispy noodles, no dressing | 93                 | 5                  | A           | 2             |
| 41311020 | 8000_Mixed | Sambar, vegetable stew                                                                                                             | 93                 | 5                  | A           | 2             |
| 58146672 | 8000_Mixed | Pasta, whole grain, with tomato-based sauce, seafood, and added vegetables, home recipe                                            | 93                 | 4.5                | A           | 2             |
| 75232050 | 8000_Mixed | Seaweed, prepared with soy sauce                                                                                                   | 93                 | 3.5                | C           | 2             |
| 27445180 | 8000_Mixed | Moo Goo Gai Pan                                                                                                                    | 92                 | 5                  | A           | 2             |
| 27450420 | 8000_Mixed | Shrimp and vegetables excluding carrots, broccoli, and dark-green leafy; no potatoes, soy-based sauce                              | 92                 | 4.5                | A           | 2             |
| 27450610 | 8000_Mixed | Shellfish mixture and vegetables excluding carrots, broccoli, and dark-green leafy; no potatoes, soy-based sauce                   | 92                 | 4.5                | A           | 2             |
| 75316050 | 8000_Mixed | Ratatouille                                                                                                                        | 91                 | 4.5                | A           | 2             |
| 27446360 | 8000_Mixed | Chicken or turkey caesar garden salad, chicken and/or turkey, lettuce, tomato, cheese, no dressing                                 | 91                 | 5                  | A           | 2             |
| 75403200 | 8000_Mixed | Beans, string, green, cooked, Szechuan-style                                                                                       | 91                 | 4.5                | A           | 2             |
| 27151040 | 8000_Mixed | Crabs in tomato-based sauce, Puerto Rican style                                                                                    | 91                 | 3.5                | C           | 2             |
| 27450430 | 8000_Mixed | Shrimp shish kabob with vegetables, excluding potatoes                                                                             | 91                 | 4.5                | A           | 2             |
| 27450040 | 8000_Mixed | Shrimp chow mein or chop suey, no noodles                                                                                          | 90                 | 5                  | A           | 1             |
| 27450470 | 8000_Mixed | Kung Pao shrimp                                                                                                                    | 90                 | 4                  | A           | 2             |
| 27250220 | 8000_Mixed | Oyster fritter                                                                                                                     | 90                 | 3                  | C           | 3             |
| 72125231 | 8000_Mixed | Spinach, from fresh, creamed                                                                                                       | 89                 | 4                  | A           | 1             |
| 41603010 | 8000_Mixed | Lentil soup, home recipe, canned, or ready-to-serve                                                                                | 88                 | 5                  | A           | 2             |
| 58146612 | 8000_Mixed | Pasta, whole grain, with tomato-based sauce and added vegetables, home recipe                                                      | 88                 | 4.5                | A           | 2             |
| 27350110 | 8000_Mixed | Bouillabaisse                                                                                                                      | 88                 | 4                  | A           | 1             |
| 28351110 | 8000_Mixed | Fish and vegetable soup, no potatoes, Mexican style                                                                                | 88                 | 4                  | B           | 2             |
| 75440100 | 8000_Mixed | Vegetable combination, including carrots, broccoli, and/or dark-green leafy; cooked, with soy-based sauce                          | 88                 | 4                  | B           | 2             |
| 27251010 | 8000_Mixed | Stewed salmon, Puerto Rican style                                                                                                  | 88                 | 4.5                | B           | 2             |
| 27446300 | 8000_Mixed | Chicken or turkey garden salad, chicken and/or turkey, tomato and/or carrots, other vegetables, no dressing                        | 88                 | 5                  | A           | 1             |
| 41812500 | 8000_Mixed | Tofu and vegetables including carrots, broccoli, and/or dark-green leafy; no potatoes, with soy-based sauce                        | 88                 | 4                  | B           | 2             |
| 27450150 | 8000_Mixed | Fish, tofu, and vegetables, tempura                                                                                                | 88                 | 4.5                | B           | 2             |
| 27451030 | 8000_Mixed | Lobster with sauce, Puerto Rican style                                                                                             | 87                 | 4                  | C           | 2             |
| 72125252 | 8000_Mixed | Spinach, cooked, from frozen, with cheese sauce                                                                                    | 87                 | 4                  | B           | 3             |
| 75201030 | 8000_Mixed | Artichoke salad in oil                                                                                                             | 87                 | 5                  | A           | 3             |
| 58146662 | 8000_Mixed | Pasta, whole grain, with tomato-based sauce and seafood, home recipe                                                               | 87                 | 4                  | A           | 2             |
| 28355470 | 8000_Mixed | Seafood soup with vegetables including carrots, broccoli, and/or dark-green leafy; no potatoes                                     | 87                 | 4.5                | B           | 2             |
| 72125250 | 8000_Mixed | Spinach, cooked, NS as to form, with cheese sauce                                                                                  | 87                 | 4                  | B           | 3             |
| 27446310 | 8000_Mixed | Chicken or turkey garden salad, chicken and/or turkey, other vegetables excluding tomato and carrots, no dressing                  | 87                 | 5                  | A           | 1             |
| 27450450 | 8000_Mixed | Shrimp creole, no rice                                                                                                             | 87                 | 4                  | A           | 3             |
| 28355480 | 8000_Mixed | Seafood soup with vegetables excluding carrots, broccoli, and dark-green leafy; no potatoes                                        | 86                 | 4.5                | B           | 2             |
| 41601080 | 8000_Mixed | Pinto bean soup, home recipe, canned or ready-to-serve                                                                             | 86                 | 5                  | A           | 2             |
| 27450710 | 8000_Mixed | Fish and vegetables excluding carrots, broccoli, and dark-green leafy; no potatoes, tomato-based sauce                             | 85                 | 4.5                | B           | 2             |
| 75439500 | 8000_Mixed | Chow mein or chop suey, meatless, no noodles                                                                                       | 85                 | 4                  | B           | 1             |
| 27250040 | 8000_Mixed | Crab cake                                                                                                                          | 85                 | 3.5                | C           | 3             |
| 28355450 | 8000_Mixed | Seafood soup with potatoes and vegetables including carrots, broccoli, and/or dark-green leafy                                     | 85                 | 4.5                | A           | 2             |
| 58161325 | 8000_Mixed | Rice, brown, with beans and tomatoes                                                                                               | 85                 | 5                  | A           | 2             |
| 58146652 | 8000_Mixed | Pasta, whole grain, with tomato-based sauce, poultry, and added vegetables, home recipe                                            | 85                 | 4.5                | A           | 1             |
| 28350120 | 8000_Mixed | Crab soup, tomato-base                                                                                                             | 85                 | 4.5                | A           | 1             |
| 27420080 | 8000_Mixed | Greens with ham or pork                                                                                                            | 85                 | 4.5                | A           | 3             |
| 27250060 | 8000_Mixed | Gefilte fish                                                                                                                       | 84                 | 4                  | A           | 2             |
| 58146602 | 8000_Mixed | Pasta, whole grain, with tomato-based sauce, home recipe                                                                           | 84                 | 4.5                | A           | 2             |
| 72125310 | 8000_Mixed | Palak Paneer                                                                                                                       | 84                 | 4.5                | B           | 2             |
| 72306000 | 8000_Mixed | Watercress broth with shrimp                                                                                                       | 84                 | 4                  | B           | 2             |
| 28355460 | 8000_Mixed | Seafood soup with potatoes, and vegetables excluding carrots, broccoli, and dark-green leafy                                       | 84                 | 4.5                | B           | 2             |
| 75141025 | 8000_Mixed | Cabbage salad or coleslaw, made with light Italian dressing                                                                        | 84                 | 4                  | B           | 2             |
| 72125232 | 8000_Mixed | Spinach, from frozen, creamed                                                                                                      | 83                 | 4                  | A           | 1             |
| 58175000 | 8000_Mixed | Vada, fried dumpling                                                                                                               | 83                 | 5                  | A           | 2             |
| 27141500 | 8000_Mixed | Chili con carne with chicken or turkey and beans                                                                                   | 83                 | 4.5                | A           | 2             |
| 72125230 | 8000_Mixed | Spinach, NS as to form, creamed                                                                                                    | 83                 | 4                  | A           | 1             |
| 75417031 | 8000_Mixed | Peas, cooked, from fresh, with tomato sauce                                                                                        | 83                 | 5                  | A           | 2             |
| 27450080 | 8000_Mixed | Seafood salad                                                                                                                      | 82                 | 3                  | C           | 3             |
| 75440110 | 8000_Mixed | Vegetable combination, excluding carrots, broccoli, and dark-green leafy; cooked, with soy-based sauce                             | 82                 | 4                  | C           | 2             |
| 58161320 | 8000_Mixed | Rice, brown, with beans                                                                                                            | 82                 | 5                  | A           | 2             |
| 41812510 | 8000_Mixed | Tofu and vegetables excluding carrots, broccoli, and dark-green leafy; no potatoes, with soy-based sauce                           | 82                 | 4                  | B           | 2             |
| 73101210 | 8000_Mixed | Carrots, raw, salad with apples                                                                                                    | 82                 | 4                  | C           | 3             |
| 28351120 | 8000_Mixed | Fish soup with potatoes, Mexican style                                                                                             | 81                 | 3.5                | B           | 2             |
| 58146642 | 8000_Mixed | Pasta, whole grain, with tomato-based sauce and poultry, home recipe                                                               | 81                 | 4                  | A           | 1             |
| 58161470 | 8000_Mixed | Rice, brown, with dark green vegetables, NS as to fat added in cooking                                                             | 81                 | 3.5                | A           | 2             |
| 58161474 | 8000_Mixed | Rice, brown, with dark green vegetables, fat added in cooking                                                                      | 81                 | 3.5                | A           | 2             |
| 75450600 | 8000_Mixed | Vegetable combination, including carrots, broccoli, and/or dark-green leafy; cooked, with butter sauce                             | 81                 | 4.5                | A           | 3             |
| 27250070 | 8000_Mixed | Salmon cake or patty                                                                                                               | 81                 | 3.5                | C           | 3             |
| 75141030 | 8000_Mixed | Cabbage salad or coleslaw, made with creamy dressing                                                                               | 81                 | 4                  | C           | 3             |
| 27446350 | 8000_Mixed | Asian chicken or turkey garden salad, chicken and/or turkey, lettuce, fruit, nuts, no dressing                                     | 80                 | 5                  | A           | 1             |
| 28350310 | 8000_Mixed | Turtle and vegetable soup                                                                                                          | 80                 | 4.5                | B           | 2             |
| 27250160 | 8000_Mixed | Tuna cake or patty                                                                                                                 | 80                 | 3.5                | C           | 3             |

| foodcode | level1nd   | Description                                                                                                                | Food Compass Score | Health Star Rating | Nutri-Score | NOVA Category |
|----------|------------|----------------------------------------------------------------------------------------------------------------------------|--------------------|--------------------|-------------|---------------|
| 27250400 | 8000_Mixed | Shrimp cake or patty                                                                                                       | 80                 | 4                  | B           | 3             |
| 27446330 | 8000_Mixed | Chicken or turkey garden salad with cheese, chicken and/or turkey, cheese, lettuce and/or greens, tomato and/or carrots, c | 80                 | 5                  | A           | 2             |
| 27445125 | 8000_Mixed | Chicken or turkey and vegetables including carrots, broccoli, and/or dark-green leafy; no potatoes, tomato-based sauce     | 80                 | 4.5                | B           | 2             |
| 32101530 | 8000_Mixed | Egg curry                                                                                                                  | 79                 | 4.5                | A           | 2             |
| 72125233 | 8000_Mixed | Spinach, from canned, creamed                                                                                              | 79                 | 4                  | B           | 1             |
| 58161490 | 8000_Mixed | Rice, brown, with dark green vegetables and tomatoes and/or tomato-based sauce, NS as to fat added in cooking              | 79                 | 3.5                | A           | 2             |
| 58161494 | 8000_Mixed | Rice, brown, with dark green vegetables and tomatoes and/or tomato-based sauce, fat added in cooking                       | 79                 | 3.5                | A           | 2             |
| 27150310 | 8000_Mixed | Fish with tomato-based sauce                                                                                               | 79                 | 4                  | A           | 1             |
| 27450100 | 8000_Mixed | Tuna salad with egg                                                                                                        | 79                 | 3.5                | C           | 3             |
| 58161510 | 8000_Mixed | Grape leaves stuffed with rice                                                                                             | 79                 | 4.5                | A           | 1             |
| 58146215 | 8000_Mixed | Pasta with sauce, meatless, school lunch                                                                                   | 79                 | 5                  | A           | 4             |
| 27350310 | 8000_Mixed | Seafood stew with potatoes and vegetables including carrots, broccoli, and/or dark-green leafy; tomato-based sauce         | 78                 | 4.5                | A           | 2             |
| 58161500 | 8000_Mixed | Rice, brown, with carrots and dark green vegetables, NS as to fat added in cooking                                         | 78                 | 3.5                | A           | 2             |
| 58161504 | 8000_Mixed | Rice, brown, with carrots and dark green vegetables, fat added in cooking                                                  | 78                 | 3.5                | A           | 2             |
| 58161472 | 8000_Mixed | Rice, brown, with dark green vegetables, fat not added in cooking                                                          | 78                 | 3.5                | A           | 1             |
| 58161460 | 8000_Mixed | Rice, brown, with tomatoes and/or tomato based sauce, NS as to fat added in cooking                                        | 78                 | 4                  | A           | 2             |
| 58161464 | 8000_Mixed | Rice, brown, with tomatoes and/or tomato based sauce, fat added in cooking                                                 | 78                 | 4                  | A           | 2             |
| 75141020 | 8000_Mixed | Cabbage salad or coleslaw, made with Italian dressing                                                                      | 78                 | 4                  | B           | 3             |
| 75302080 | 8000_Mixed | Bean salad, yellow and/or green string beans                                                                               | 78                 | 4.5                | A           | 3             |
| 58161435 | 8000_Mixed | Rice, brown, with carrots, NS as to fat added in cooking                                                                   | 78                 | 3.5                | A           | 2             |
| 58161439 | 8000_Mixed | Rice, brown, with carrots, fat added in cooking                                                                            | 78                 | 3.5                | A           | 2             |
| 58161520 | 8000_Mixed | Rice, brown, with carrots, dark green vegetables, and tomatoes and/or tomato-based sauce, NS as to fat added in cooking    | 78                 | 3.5                | A           | 2             |
| 58161524 | 8000_Mixed | Rice, brown, with carrots, dark green vegetables, and tomatoes and/or tomato-based sauce, fat added in cooking             | 78                 | 3.5                | A           | 2             |
| 27351010 | 8000_Mixed | Codfish with starchy vegetables, Puerto Rican style                                                                        | 77                 | 5                  | A           | 2             |
| 27350030 | 8000_Mixed | Seafood stew with potatoes and vegetables excluding carrots, broccoli, and dark-green leafy; tomato-based sauce            | 77                 | 4.5                | A           | 3             |
| 27361010 | 8000_Mixed | Stewed variety meats, mostly liver, Puerto Rican style                                                                     | 77                 | 4.5                | A           | 1             |
| 75440310 | 8000_Mixed | Vegetable combinations, excluding carrots, broccoli, and dark-green leafy; cooked, with tomato sauce                       | 77                 | 4.5                | A           | 1             |
| 58161480 | 8000_Mixed | Rice, brown, with carrots and tomatoes and/or tomato-based sauce, NS as to fat added in cooking                            | 77                 | 4                  | A           | 2             |
| 58161484 | 8000_Mixed | Rice, brown, with carrots and tomatoes and/or tomato-based sauce, fat added in cooking                                     | 77                 | 4                  | A           | 2             |
| 28310160 | 8000_Mixed | Beef broth, with tomato, home recipe                                                                                       | 77                 | 4                  | B           | 2             |
| 27250210 | 8000_Mixed | Clam cake or patty                                                                                                         | 77                 | 3.5                | C           | 3             |
| 58175110 | 8000_Mixed | Tabbouleh                                                                                                                  | 77                 | 4                  | C           | 2             |
| 27146150 | 8000_Mixed | Chicken curry                                                                                                              | 77                 | 4.5                | A           | 2             |
| 27450010 | 8000_Mixed | Crab salad                                                                                                                 | 76                 | 3                  | C           | 4             |
| 27351040 | 8000_Mixed | Biscayne codfish, Puerto Rican style                                                                                       | 76                 | 4.5                | A           | 2             |
| 27150350 | 8000_Mixed | Sardines with tomato-based sauce                                                                                           | 76                 | 4                  | C           | 3             |
| 73101110 | 8000_Mixed | Carrots, raw, salad                                                                                                        | 76                 | 4                  | C           | 3             |
| 58161430 | 8000_Mixed | Rice, brown, with peas, NS as to fat added in cooking                                                                      | 76                 | 4                  | A           | 2             |
| 58161434 | 8000_Mixed | Rice, brown, with peas, fat added in cooking                                                                               | 76                 | 4                  | A           | 2             |
| 75140510 | 8000_Mixed | Broccoli slaw salad                                                                                                        | 76                 | 4                  | B           | 3             |
| 27150370 | 8000_Mixed | Sardines with mustard sauce                                                                                                | 76                 | 4                  | C           | 3             |
| 27420100 | 8000_Mixed | Pork, tofu, and vegetables including carrots, broccoli, and/or dark-green leafy; no potatoes, soy-base sauce               | 76                 | 4                  | A           | 2             |
| 28340130 | 8000_Mixed | Chicken or turkey broth, with tomato, home recipe                                                                          | 76                 | 4                  | B           | 2             |
| 27450650 | 8000_Mixed | Shellfish mixture and vegetables including carrots, broccoli, and/or dark-green leafy; no potatoes, mushroom sauce         | 76                 | 3.5                | B           | 2             |
| 58146673 | 8000_Mixed | Pasta, whole grain, with tomato-based sauce, seafood, and added vegetables, ready-to-heat                                  | 76                 | 4                  | A           | 4             |
| 58161492 | 8000_Mixed | Rice, brown, with dark green vegetables and tomatoes and/or tomato-based sauce, fat not added in cooking                   | 76                 | 3.5                | A           | 1             |
| 27540240 | 8000_Mixed | Chicken fillet, broiled, sandwich, on whole wheat roll, with lettuce, tomato and spread                                    | 75                 | 4                  | A           | 3             |
| 58146663 | 8000_Mixed | Pasta, whole grain, with tomato-based sauce and seafood, ready-to-heat                                                     | 75                 | 4                  | A           | 4             |
| 58146632 | 8000_Mixed | Pasta, whole grain, with tomato-based sauce, meat, and added vegetables, home recipe                                       | 75                 | 4.5                | A           | 1             |
| 75148010 | 8000_Mixed | Cobb salad, no dressing                                                                                                    | 75                 | 4.5                | A           | 2             |
| 75417032 | 8000_Mixed | Peas, cooked, from frozen, with tomato sauce                                                                               | 75                 | 4.5                | A           | 1             |
| 75440400 | 8000_Mixed | Vegetables, dipped in chick-pea flour batter, fried, Pakora                                                                | 75                 | 4.5                | A           | 2             |
| 75417030 | 8000_Mixed | Peas, cooked, NS as to form, with tomato sauce                                                                             | 75                 | 4.5                | A           | 1             |
| 58161440 | 8000_Mixed | Rice, brown, with peas and carrots, NS as to fat added in cooking                                                          | 74                 | 4                  | A           | 2             |
| 58161444 | 8000_Mixed | Rice, brown, with peas and carrots, fat added in cooking                                                                   | 74                 | 4                  | A           | 2             |
| 58161502 | 8000_Mixed | Rice, brown, with carrots and dark green vegetables, fat not added in cooking                                              | 74                 | 3.5                | A           | 1             |
| 75401010 | 8000_Mixed | Asparagus, NS as to form, creamed or with cheese sauce                                                                     | 74                 | 4                  | B           | 2             |
| 75612010 | 8000_Mixed | Zucchini soup, cream of, prepared with milk                                                                                | 74                 | 4                  | B           | 1             |
| 27415120 | 8000_Mixed | Beef, tofu, and vegetables including carrots, broccoli, and/or dark-green leafy; no potatoes, soy-based sauce              | 74                 | 4                  | A           | 2             |
| 58161437 | 8000_Mixed | Rice, brown, with carrots, fat not added in cooking                                                                        | 74                 | 3.5                | A           | 1             |
| 58161482 | 8000_Mixed | Rice, brown, with carrots and tomatoes and/or tomato-based sauce, fat not added in cooking                                 | 74                 | 4                  | A           | 1             |
| 27450064 | 8000_Mixed | Tuna salad, made with creamy dressing                                                                                      | 73                 | 3.5                | B           | 4             |
| 58161462 | 8000_Mixed | Rice, brown, with tomatoes and/or tomato based sauce, fat not added in cooking                                             | 73                 | 4                  | A           | 1             |
| 58161530 | 8000_Mixed | Rice, brown, with other vegetables, NS as to fat added in cooking                                                          | 73                 | 3.5                | A           | 2             |
| 58161534 | 8000_Mixed | Rice, brown, with other vegetables, fat added in cooking                                                                   | 73                 | 3.5                | A           | 2             |
| 75401012 | 8000_Mixed | Asparagus, from frozen, creamed or with cheese sauce                                                                       | 73                 | 4                  | B           | 2             |
| 58161522 | 8000_Mixed | Rice, brown, with carrots, dark green vegetables, and tomatoes and/or tomato-based sauce, fat not added in cooking         | 73                 | 3.5                | A           | 1             |
| 27450020 | 8000_Mixed | Lobster salad                                                                                                              | 73                 | 3                  | C           | 4             |
| 27250128 | 8000_Mixed | Shrimp and noodles with soy-based sauce                                                                                    | 73                 | 3.5                | B           | 2             |
| 58146671 | 8000_Mixed | Pasta, whole grain, with tomato-based sauce, seafood, and added vegetables, restaurant                                     | 73                 | 4                  | B           | 4             |
| 58161432 | 8000_Mixed | Rice, brown, with peas, fat not added in cooking                                                                           | 73                 | 4                  | A           | 1             |
| 27446315 | 8000_Mixed | Chicken or turkey garden salad with bacon and cheese, chicken and/or turkey, bacon, cheese, lettuce and/or greens, tomat   | 73                 | 5                  | A           | 2             |
| 58146613 | 8000_Mixed | Pasta, whole grain, with tomato-based sauce and added vegetables, ready-to-heat                                            | 72                 | 4.5                | A           | 4             |
| 72201241 | 8000_Mixed | Broccoli, cooked, from fresh, with mushroom sauce                                                                          | 72                 | 4.5                | B           | 2             |
| 27451070 | 8000_Mixed | Codfish salad, Puerto Rican style, Serenata                                                                                | 72                 | 4                  | C           | 2             |
| 27450030 | 8000_Mixed | Salmon salad                                                                                                               | 72                 | 3                  | C           | 4             |
| 41601070 | 8000_Mixed | Soybean soup, miso broth                                                                                                   | 72                 | 3.5                | C           | 3             |
| 58146661 | 8000_Mixed | Pasta, whole grain, with tomato-based sauce and seafood, restaurant                                                        | 72                 | 4                  | B           | 4             |
| 27150120 | 8000_Mixed | Tuna with cream or white sauce                                                                                             | 72                 | 4                  | B           | 2             |
| 75601200 | 8000_Mixed | Cabbage soup, home recipe, canned or ready-to-serve                                                                        | 72                 | 4.5                | B           | 2             |
| 27450060 | 8000_Mixed | Tuna salad, made with mayonnaise                                                                                           | 72                 | 3.5                | C           | 4             |
| 27415110 | 8000_Mixed | Beef and broccoli                                                                                                          | 72                 | 4.5                | B           | 2             |
| 27420400 | 8000_Mixed | Pork and vegetables including carrots, broccoli, and/or dark-green leafy; no potatoes, tomato-based sauce                  | 72                 | 4.5                | A           | 2             |
| 28355260 | 8000_Mixed | Lobster gumbo                                                                                                              | 72                 | 4.5                | A           | 2             |
| 75141000 | 8000_Mixed | Cabbage salad or coleslaw, made with coleslaw dressing                                                                     | 71                 | 4                  | C           | 3             |
| 27445130 | 8000_Mixed | Chicken or turkey and vegetables excluding carrots, broccoli, and dark-green leafy; no potatoes, tomato-based sauce        | 71                 | 4.5                | B           | 2             |
| 74501010 | 8000_Mixed | Tomato aspic                                                                                                               | 71                 | 4.5                | B           | 2             |
| 41601200 | 8000_Mixed | Liquid from stewed kidney beans, Puerto Rican style                                                                        | 71                 | 3.5                | B           | 1             |
| 58146622 | 8000_Mixed | Pasta, whole grain, with tomato-based sauce and meat, home recipe                                                          | 71                 | 4                  | A           | 1             |
| 75141100 | 8000_Mixed | Cabbage salad or coleslaw with apples and/or raisins, with dressing                                                        | 71                 | 4                  | C           | 2             |
| 58160800 | 8000_Mixed | Rice, white, with lentils, NS as to fat added in cooking                                                                   | 71                 | 5                  | A           | 2             |
| 58160805 | 8000_Mixed | Rice, white, with lentils, fat added in cooking                                                                            | 71                 | 5                  | A           | 2             |
| 75649110 | 8000_Mixed | Vegetable soup, home recipe                                                                                                | 71                 | 4.5                | B           | 2             |
| 27451010 | 8000_Mixed | Fried fish with sauce, Puerto Rican style                                                                                  | 71                 | 3.5                | C           | 2             |
| 27450061 | 8000_Mixed | Tuna salad, made with light mayonnaise                                                                                     | 71                 | 3.5                | B           | 4             |
| 27450063 | 8000_Mixed | Tuna salad, made with light mayonnaise-type salad dressing                                                                 | 71                 | 3.5                | B           | 4             |
| 27411100 | 8000_Mixed | Beef with vegetables including carrots, broccoli, and/or dark-green leafy; no potatoes, tomato-based sauce                 | 71                 | 4.5                | A           | 2             |
| 27420370 | 8000_Mixed | Pork, tofu, and vegetables, excluding carrots, broccoli, and dark-green leafy; no potatoes, soy-based sauce                | 71                 | 4                  | A           | 2             |
| 75141035 | 8000_Mixed | Cabbage salad or coleslaw, made with light creamy dressing                                                                 | 70                 | 4                  | B           | 3             |
| 27250250 | 8000_Mixed | Flounder with crab stuffing                                                                                                | 70                 | 4                  | B           | 3             |
| 75141200 | 8000_Mixed | Cabbage salad or coleslaw with pineapple, with dressing                                                                    | 70                 | 4                  | B           | 3             |
| 58160120 | 8000_Mixed | Rice with beans and tomatoes                                                                                               | 70                 | 5                  | A           | 2             |

| foodcode | level1nd   | Description                                                                                                                | Food Compass Score | Health Star Rating | Nutri-Score | NOVA Category |
|----------|------------|----------------------------------------------------------------------------------------------------------------------------|--------------------|--------------------|-------------|---------------|
| 58161442 | 8000_Mixed | Rice, brown, with peas and carrots, fat not added in cooking                                                               | 70                 | 4                  | A           | 1             |
| 27446205 | 8000_Mixed | Chicken or turkey salad with nuts and/or fruits                                                                            | 70                 | 4                  | B           | 2             |
| 58146603 | 8000_Mixed | Pasta, whole grain, with tomato-based sauce, ready-to-heat                                                                 | 70                 | 4                  | A           | 4             |
| 27445250 | 8000_Mixed | Almond chicken                                                                                                             | 70                 | 4                  | B           | 2             |
| 27450067 | 8000_Mixed | Tuna salad, made with light Italian dressing                                                                               | 70                 | 3.5                | B           | 4             |
| 27450250 | 8000_Mixed | Oysters Rockefeller                                                                                                        | 70                 | 3                  | B           | 3             |
| 75141040 | 8000_Mixed | Cabbage salad or coleslaw, made with any type of fat free dressing                                                         | 70                 | 4.5                | A           | 2             |
| 58403100 | 8000_Mixed | Noodle and potato soup, Puerto Rican style                                                                                 | 70                 | 4.5                | B           | 1             |
| 28340150 | 8000_Mixed | Mexican style chicken broth soup stock                                                                                     | 70                 | 4.5                | B           | 2             |
| 27330170 | 8000_Mixed | Stuffed grape leaves with lamb and rice                                                                                    | 70                 | 4.5                | A           | 1             |
| 27341510 | 8000_Mixed | Chicken or turkey stew with potatoes and vegetables including carrots, broccoli, and/or dark-green leafy; tomato-based sau | 70                 | 4.5                | A           | 2             |
| 14670000 | 8000_Mixed | Mozzarella cheese, tomato, and basil, with oil and vinegar dressing                                                        | 70                 | 4                  | B           | 2             |
| 27341055 | 8000_Mixed | Chicken or turkey, potatoes, and vegetables including carrots, broccoli, and/or dark-green leafy; tomato-based sauce       | 70                 | 4.5                | B           | 2             |
| 27445120 | 8000_Mixed | Chicken or turkey and vegetables excluding carrots, broccoli, and dark-green leafy; no potatoes, soy-based sauce           | 69                 | 4                  | A           | 2             |
| 27450066 | 8000_Mixed | Tuna salad, made with Italian dressing                                                                                     | 69                 | 3.5                | B           | 4             |
| 27415220 | 8000_Mixed | Beef, tofu, and vegetables excluding carrots, broccoli, and dark-green leafy; no potatoes, soy-based sauce                 | 69                 | 4                  | A           | 2             |
| 27445110 | 8000_Mixed | Chicken or turkey and vegetables including carrots, broccoli, and/or dark-green leafy; no potatoes, soy-based sauce        | 69                 | 4.5                | A           | 1             |
| 58161420 | 8000_Mixed | Rice, brown, with corn, NS as to fat added in cooking                                                                      | 69                 | 4                  | A           | 2             |
| 58161424 | 8000_Mixed | Rice, brown, with corn, fat added in cooking                                                                               | 69                 | 4                  | A           | 2             |
| 58146611 | 8000_Mixed | Pasta, whole grain, with tomato-based sauce and added vegetables, restaurant                                               | 69                 | 4.5                | B           | 4             |
| 75417033 | 8000_Mixed | Peas, cooked, from canned, with tomato sauce                                                                               | 69                 | 4.5                | A           | 3             |
| 27450062 | 8000_Mixed | Tuna salad, made with mayonnaise-type salad dressing                                                                       | 69                 | 3.5                | B           | 4             |
| 58161532 | 8000_Mixed | Rice, brown, with other vegetables, fat not added in cooking                                                               | 69                 | 3.5                | A           | 1             |
| 41601040 | 8000_Mixed | Lima bean soup, home recipe, canned or ready-to-serve                                                                      | 69                 | 4.5                | A           | 2             |
| 58146601 | 8000_Mixed | Pasta, whole grain, with tomato-based sauce, restaurant                                                                    | 69                 | 4                  | B           | 4             |
| 75401011 | 8000_Mixed | Asparagus, from fresh, creamed or with cheese sauce                                                                        | 68                 | 4                  | B           | 2             |
| 28150210 | 8000_Mixed | Haddock with chopped spinach, diet frozen meal                                                                             | 68                 | 4                  | A           | 4             |
| 75647000 | 8000_Mixed | Seaweed soup                                                                                                               | 68                 | 4                  | C           | 3             |
| 28340580 | 8000_Mixed | Chicken or turkey soup with vegetables, broccoli, carrots, celery, potatoes and onions, Asian style                        | 68                 | 4                  | B           | 2             |
| 72201240 | 8000_Mixed | Broccoli, cooked, NS as to form, with mushroom sauce                                                                       | 68                 | 4.5                | A           | 2             |
| 72201242 | 8000_Mixed | Broccoli, cooked, from frozen, with mushroom sauce                                                                         | 68                 | 4.5                | A           | 2             |
| 27450660 | 8000_Mixed | Shellfish mixture and vegetables excluding carrots, broccoli, and dark-green leafy; no potatoes, mushroom sauce            | 68                 | 4                  | B           | 2             |
| 72125260 | 8000_Mixed | Spinach and cheese casserole                                                                                               | 68                 | 4                  | B           | 3             |
| 28350040 | 8000_Mixed | Fish stock, home recipe                                                                                                    | 68                 | 3.5                | B           | 1             |
| 41601130 | 8000_Mixed | Bean soup, mixed beans, home recipe, canned or ready-to-serve                                                              | 68                 | 4.5                | A           | 1             |
| 27440110 | 8000_Mixed | Chicken or turkey and vegetables including carrots, broccoli, and/or dark-green leafy; no potatoes, no sauce               | 68                 | 4                  | B           | 2             |
| 27120160 | 8000_Mixed | Pork curry                                                                                                                 | 68                 | 4.5                | A           | 2             |
| 27150030 | 8000_Mixed | Crab imperial                                                                                                              | 68                 | 3.5                | B           | 3             |
| 75651000 | 8000_Mixed | Minestrone soup, home recipe                                                                                               | 67                 | 4.5                | A           | 2             |
| 41601100 | 8000_Mixed | Portuguese bean soup, home recipe, canned or ready-to-serve                                                                | 67                 | 4.5                | A           | 2             |
| 73501000 | 8000_Mixed | Carrot soup, cream of, prepared with milk, home recipe, canned or ready-to-serve                                           | 67                 | 4                  | B           | 1             |
| 27150010 | 8000_Mixed | Fish with cream or white sauce, not tuna or lobster                                                                        | 67                 | 4                  | A           | 1             |
| 27341520 | 8000_Mixed | Chicken or turkey stew with potatoes and vegetables excluding carrots, broccoli, and dark-green leafy; tomato-based sauce  | 67                 | 4.5                | A           | 2             |
| 58146653 | 8000_Mixed | Pasta, whole grain, with tomato-based sauce, poultry, and added vegetables, ready-to-heat                                  | 67                 | 4                  | A           | 4             |
| 27150250 | 8000_Mixed | Fish moochim                                                                                                               | 67                 | 0.5                | D           | 2             |
| 58160110 | 8000_Mixed | Rice with beans                                                                                                            | 67                 | 5                  | A           | 2             |
| 75144100 | 8000_Mixed | Lettuce, wilted, with bacon dressing                                                                                       | 67                 | 4                  | B           | 2             |
| 58146643 | 8000_Mixed | Pasta, whole grain, with tomato-based sauce and poultry, ready-to-heat                                                     | 67                 | 4                  | A           | 4             |
| 27151050 | 8000_Mixed | Shrimp in garlic sauce, Puerto Rican style                                                                                 | 67                 | 3                  | D           | 3             |
| 27250030 | 8000_Mixed | Codfish ball or cake                                                                                                       | 67                 | 4                  | B           | 2             |
| 27510511 | 8000_Mixed | Hamburger, 1 miniature patty, on miniature bun, from school                                                                | 66                 | 4                  | A           | 3             |
| 27320100 | 8000_Mixed | Pork, potatoes, and vegetables including carrots, broccoli, and/or dark-green leafy; tomato-based sauce                    | 66                 | 4.5                | B           | 2             |
| 28150220 | 8000_Mixed | Flounder with chopped broccoli, diet frozen meal                                                                           | 66                 | 4                  | A           | 4             |
| 58146651 | 8000_Mixed | Pasta, whole grain, with tomato-based sauce, poultry, and added vegetables, restaurant                                     | 66                 | 4                  | B           | 4             |
| 27445220 | 8000_Mixed | Kung pao chicken                                                                                                           | 66                 | 4                  | A           | 1             |
| 27420500 | 8000_Mixed | Pork and vegetables including carrots, broccoli, and/or dark-green leafy; no potatoes, soy-based sauce                     | 66                 | 4.5                | A           | 2             |
| 27345310 | 8000_Mixed | Chicken or turkey, rice, and vegetables including carrots, broccoli, and/or dark-green leafy; soy-based sauce              | 66                 | 4                  | A           | 2             |
| 58146641 | 8000_Mixed | Pasta, whole grain, with tomato-based sauce and poultry, restaurant                                                        | 66                 | 4                  | B           | 4             |
| 27341060 | 8000_Mixed | Chicken or turkey, potatoes, and vegetables excluding carrots, broccoli, and dark-green leafy; tomato-based sauce          | 66                 | 4.5                | B           | 2             |
| 75140990 | 8000_Mixed | Cabbage salad or coleslaw, from fast food / restaurant                                                                     | 66                 | 4                  | C           | 1             |
| 27510150 | 8000_Mixed | Cheeseburger, 1 miniature patty, on miniature bun, from school                                                             | 66                 | 4                  | B           | 3             |
| 27420120 | 8000_Mixed | Pork and watercress with soy-based sauce                                                                                   | 66                 | 4                  | B           | 2             |
| 27510565 | 8000_Mixed | Hamburger, on bun, from school                                                                                             | 66                 | 4                  | A           | 3             |
| 75440200 | 8000_Mixed | Vegetable tempura                                                                                                          | 65                 | 4                  | B           | 2             |
| 72201250 | 8000_Mixed | Broccoli, cooked, NS as to form, with cream sauce                                                                          | 65                 | 4.5                | A           | 1             |
| 72201231 | 8000_Mixed | Broccoli, cooked, from fresh, with cheese sauce                                                                            | 65                 | 4                  | A           | 3             |
| 27150410 | 8000_Mixed | Shrimp teriyaki                                                                                                            | 65                 | 4                  | B           | 2             |
| 27315270 | 8000_Mixed | Stuffed grape leaves with beef and rice                                                                                    | 65                 | 4.5                | B           | 1             |
| 58160810 | 8000_Mixed | Rice, white, with lentils, fat not added in cooking                                                                        | 65                 | 5                  | A           | 1             |
| 41601140 | 8000_Mixed | Bean soup, home recipe                                                                                                     | 65                 | 5                  | A           | 2             |
| 28353530 | 8000_Mixed | Salmon soup, cream style                                                                                                   | 64                 | 3.5                | B           | 2             |
| 27415100 | 8000_Mixed | Beef and vegetables including carrots, broccoli, and/or dark-green leafy; no potatoes, soy-based sauce                     | 64                 | 4.5                | A           | 2             |
| 27420410 | 8000_Mixed | Pork and vegetables excluding carrots, broccoli, and dark-green leafy; no potatoes, tomato-based sauce                     | 64                 | 4.5                | A           | 2             |
| 27130100 | 8000_Mixed | Lamb or mutton curry                                                                                                       | 64                 | 4                  | B           | 2             |
| 72308500 | 8000_Mixed | Dark-green leafy vegetable soup, meatless, Asian style                                                                     | 64                 | 4                  | B           | 2             |
| 28355440 | 8000_Mixed | Shrimp gumbo                                                                                                               | 64                 | 4.5                | A           | 2             |
| 27341010 | 8000_Mixed | Chicken or turkey, potatoes, and vegetables including carrots, broccoli, and/or dark-green leafy; no sauce                 | 64                 | 4.5                | A           | 2             |
| 75450500 | 8000_Mixed | Vegetable combination, including carrots, broccoli, and/or dark-green leafy; cooked, with cream sauce                      | 64                 | 4                  | B           | 1             |
| 75401013 | 8000_Mixed | Asparagus, from canned, creamed or with cheese sauce                                                                       | 64                 | 4                  | B           | 3             |
| 75601210 | 8000_Mixed | Cabbage with meat soup, home recipe, canned or ready-to-serve                                                              | 64                 | 4.5                | A           | 2             |
| 27460750 | 8000_Mixed | Liver, beef or calves, and onions                                                                                          | 64                 | 4                  | B           | 4             |
| 27420110 | 8000_Mixed | Pork and vegetables, Hawaiian style                                                                                        | 64                 | 4.5                | A           | 3             |
| 58161422 | 8000_Mixed | Rice, brown, with corn, fat not added in cooking                                                                           | 64                 | 4                  | A           | 1             |
| 58165430 | 8000_Mixed | Rice, brown, with vegetables and gravy, NS as to fat added in cooking                                                      | 64                 | 4                  | B           | 2             |
| 58165450 | 8000_Mixed | Rice, brown, with vegetables and gravy, fat added in cooking                                                               | 64                 | 4                  | B           | 2             |
| 41602020 | 8000_Mixed | Garbanzo bean or chickpea soup, home recipe, canned or ready-to-serve                                                      | 64                 | 4.5                | A           | 2             |
| 28355210 | 8000_Mixed | Crab soup, cream of, prepared with milk                                                                                    | 64                 | 3.5                | B           | 1             |
| 27311625 | 8000_Mixed | Beef, potatoes, and vegetables including carrots, broccoli, and/or dark-green leafy; tomato-based sauce                    | 64                 | 4.5                | B           | 2             |
| 58163360 | 8000_Mixed | Flavored rice, brown and wild                                                                                              | 64                 | 3.5                | B           | 3             |
| 75440500 | 8000_Mixed | Vegetable combinations, including carrots, broccoli, and/or dark-green leafy; cooked, with cheese sauce                    | 63                 | 4                  | B           | 2             |
| 58160130 | 8000_Mixed | Rice with beans and chicken                                                                                                | 63                 | 5                  | A           | 2             |
| 28350110 | 8000_Mixed | Crab soup, NS as to tomato-base or cream style                                                                             | 63                 | 3.5                | B           | 1             |
| 27460010 | 8000_Mixed | Chow mein or chop suey, NS as to type of meat, no noodles                                                                  | 63                 | 4.5                | A           | 1             |
| 74506000 | 8000_Mixed | Tomato and cucumber salad made with tomato, cucumber, oil, and vinegar                                                     | 63                 | 4                  | C           | 2             |
| 75651140 | 8000_Mixed | Vegetable soup with chicken broth, home recipe, Mexican style                                                              | 63                 | 4.5                | B           | 2             |
| 28355140 | 8000_Mixed | Clam chowder, New England, reduced sodium, canned or ready-to-serve                                                        | 63                 | 4.5                | B           | 4             |
| 27446100 | 8000_Mixed | Chicken or turkey chow mein or chop suey, no noodles                                                                       | 63                 | 4.5                | A           | 1             |
| 27411200 | 8000_Mixed | Beef with vegetables excluding carrots, broccoli, and dark-green leafy; no potatoes, tomato-based sauce                    | 63                 | 4.5                | B           | 2             |
| 27420060 | 8000_Mixed | Pork and vegetables including carrots, broccoli, and/or dark-green leafy; no potatoes, no sauce                            | 63                 | 4.5                | A           | 2             |
| 58147110 | 8000_Mixed | Pasta with tomato-based sauce and beans or lentils                                                                         | 62                 | 5                  | A           | 2             |
| 75651150 | 8000_Mixed | Vegetable noodle soup, reduced sodium, canned, prepared with water or ready-to-serve                                       | 62                 | 4.5                | A           | 4             |
| 75412070 | 8000_Mixed | Eggplant with cheese and tomato sauce                                                                                      | 62                 | 4                  | B           | 3             |

| foodcode | level1nd   | Description                                                                                                                 | Food Compass Score | Health Star Rating | Nutri-Score | NOVA Category |
|----------|------------|-----------------------------------------------------------------------------------------------------------------------------|--------------------|--------------------|-------------|---------------|
| 27420510 | 8000_Mixed | Pork and vegetables excluding carrots, broccoli, and dark-green leafy; no potatoes, soy-based sauce                         | 62                 | 4                  | A           | 2             |
| 27440120 | 8000_Mixed | Chicken or turkey and vegetables excluding carrots, broccoli, and dark-green leafy; no potatoes, no sauce                   | 62                 | 4                  | B           | 2             |
| 27250410 | 8000_Mixed | Shrimp with crab stuffing                                                                                                   | 62                 | 3.5                | C           | 3             |
| 75650990 | 8000_Mixed | Minestrone soup, reduced sodium, canned or ready-to-serve                                                                   | 62                 | 4.5                | A           | 4             |
| 27350050 | 8000_Mixed | Shrimp chow mein or chop suey with noodles                                                                                  | 62                 | 4                  | A           | 1             |
| 27260510 | 8000_Mixed | Liver dumpling                                                                                                              | 62                 | 2                  | D           | 3             |
| 27441120 | 8000_Mixed | Chicken or turkey creole, without rice                                                                                      | 62                 | 4.5                | B           | 3             |
| 27420160 | 8000_Mixed | Moo Shu pork, without Chinese pancake                                                                                       | 62                 | 3.5                | C           | 2             |
| 75406010 | 8000_Mixed | Brussels sprouts, NS as to form, creamed                                                                                    | 62                 | 4                  | A           | 2             |
| 72201230 | 8000_Mixed | Broccoli, cooked, NS as to form, with cheese sauce                                                                          | 62                 | 4                  | A           | 3             |
| 72201251 | 8000_Mixed | Broccoli, cooked, from fresh, with cream sauce                                                                              | 62                 | 3.5                | B           | 1             |
| 28340660 | 8000_Mixed | Chicken or turkey vegetable soup, home recipe                                                                               | 62                 | 4.5                | B           | 2             |
| 72201232 | 8000_Mixed | Broccoli, cooked, from frozen, with cheese sauce                                                                            | 62                 | 4                  | A           | 3             |
| 27250950 | 8000_Mixed | Shellfish and noodles with tomato-based sauce                                                                               | 62                 | 4                  | A           | 2             |
| 58146315 | 8000_Mixed | Pasta with sauce and meat, from school lunch                                                                                | 62                 | 4.5                | A           | 4             |
| 27116100 | 8000_Mixed | Beef curry                                                                                                                  | 62                 | 4.5                | B           | 2             |
| 27420150 | 8000_Mixed | Kung Pao pork                                                                                                               | 62                 | 4                  | B           | 2             |
| 75406012 | 8000_Mixed | Brussels sprouts, from frozen, creamed                                                                                      | 62                 | 4                  | A           | 2             |
| 27446332 | 8000_Mixed | Chicken or turkey, breaded, fried, garden salad with cheese, chicken and/or turkey, cheese, lettuce and/or greens, tomato   | 62                 | 4.5                | A           | 3             |
| 27510190 | 8000_Mixed | Cheeseburger on bun, from school                                                                                            | 62                 | 4                  | B           | 3             |
| 27550510 | 8000_Mixed | Sardine sandwich, with lettuce and spread                                                                                   | 62                 | 3.5                | B           | 3             |
| 27450068 | 8000_Mixed | Tuna salad, made with any type of fat free dressing                                                                         | 62                 | 3.5                | A           | 4             |
| 27440130 | 8000_Mixed | Chicken or turkey shish kabob with vegetables, excluding potatoes                                                           | 61                 | 4.5                | A           | 2             |
| 75142550 | 8000_Mixed | Cucumber salad, made with Italian dressing                                                                                  | 61                 | 4                  | C           | 2             |
| 58165460 | 8000_Mixed | Rice, brown, with vegetables, soy-based sauce, NS as to fat added in cooking                                                | 61                 | 4                  | B           | 2             |
| 58165480 | 8000_Mixed | Rice, brown, with vegetables, soy-based sauce, fat added in cooking                                                         | 61                 | 4                  | B           | 2             |
| 27345320 | 8000_Mixed | Chicken or turkey, rice, and vegetables excluding carrots, broccoli, and dark-green leafy; soy-based sauce                  | 61                 | 4                  | A           | 2             |
| 27320110 | 8000_Mixed | Pork, potatoes, and vegetables excluding carrots, broccoli, and dark-green leafy; tomato-based sauce                        | 61                 | 4.5                | B           | 2             |
| 58164830 | 8000_Mixed | Rice, brown, with gravy, NS as to fat added in cooking                                                                      | 61                 | 3.5                | B           | 2             |
| 58164850 | 8000_Mixed | Rice, brown, with gravy, fat added in cooking                                                                               | 61                 | 3.5                | B           | 2             |
| 27540250 | 8000_Mixed | Chicken fillet, broiled, sandwich with cheese, on whole wheat roll, with lettuce, tomato and non-mayonnaise type spread     | 61                 | 3.5                | B           | 2             |
| 27136100 | 8000_Mixed | Chili con carne with venison/deer and beans                                                                                 | 61                 | 5                  | A           | 1             |
| 28351170 | 8000_Mixed | Codfish soup with noodles, Puerto Rican style                                                                               | 61                 | 4                  | A           | 2             |
| 27410210 | 8000_Mixed | Beef and vegetables including carrots, broccoli, and/or dark-green leafy; no potatoes, no sauce                             | 61                 | 4.5                | A           | 2             |
| 27446362 | 8000_Mixed | Chicken or turkey, breaded, fried, caesar garden salad, chicken and/or turkey, lettuce, tomatoes, cheese, no dressing       | 61                 | 4.5                | A           | 3             |
| 27442110 | 8000_Mixed | Chicken or turkey and vegetables including carrots, broccoli, and/or dark-green leafy; no potatoes, gravy                   | 61                 | 4                  | B           | 2             |
| 75416600 | 8000_Mixed | Pea salad with cheese                                                                                                       | 61                 | 4                  | C           | 3             |
| 27415170 | 8000_Mixed | Kung Pao beef                                                                                                               | 61                 | 4                  | B           | 2             |
| 27415200 | 8000_Mixed | Beef and vegetables excluding carrots, broccoli, and dark-green leafy; no potatoes, soy-based sauce                         | 61                 | 4.5                | A           | 2             |
| 75414011 | 8000_Mixed | Mushrooms, from fresh, creamed                                                                                              | 61                 | 4                  | B           | 1             |
| 27443150 | 8000_Mixed | Chicken or turkey divan                                                                                                     | 61                 | 4                  | B           | 3             |
| 27341310 | 8000_Mixed | Chicken or turkey stew with potatoes and vegetables including carrots, broccoli, and/or dark-green leafy; gravy             | 61                 | 4.5                | A           | 2             |
| 28355250 | 8000_Mixed | Lobster bisque                                                                                                              | 61                 | 3.5                | B           | 1             |
| 58146631 | 8000_Mixed | Pasta, whole grain, with tomato-based sauce, meat, and added vegetables, restaurant                                         | 61                 | 4                  | A           | 4             |
| 27311645 | 8000_Mixed | Beef, potatoes, and vegetables including carrots, broccoli, and/or dark-green leafy; soy-based sauce                        | 60                 | 4.5                | B           | 2             |
| 58165440 | 8000_Mixed | Rice, brown, with vegetables and gravy, fat not added in cooking                                                            | 60                 | 4                  | B           | 2             |
| 75406011 | 8000_Mixed | Brussels sprouts, from fresh, creamed                                                                                       | 60                 | 4                  | B           | 1             |
| 58160140 | 8000_Mixed | Rice with beans and pork                                                                                                    | 60                 | 5                  | A           | 2             |
| 27311630 | 8000_Mixed | Beef, potatoes, and vegetables excluding carrots, broccoli, and dark-green leafy; tomato-based sauce                        | 60                 | 4.5                | B           | 2             |
| 75417021 | 8000_Mixed | Peas, cooked, from fresh, with mushroom sauce                                                                               | 60                 | 4.5                | A           | 2             |
| 58146621 | 8000_Mixed | Pasta, whole grain, with tomato-based sauce and meat, restaurant                                                            | 60                 | 4                  | B           | 4             |
| 27250132 | 8000_Mixed | Shrimp and noodles with tomato sauce                                                                                        | 60                 | 4                  | A           | 2             |
| 28351160 | 8000_Mixed | Codfish, rice, and vegetable soup, Puerto Rican style                                                                       | 60                 | 4                  | B           | 2             |
| 27250080 | 8000_Mixed | Salmon loaf                                                                                                                 | 60                 | 3                  | D           | 3             |
| 27464000 | 8000_Mixed | Gumbo, no rice                                                                                                              | 60                 | 4                  | A           | 2             |
| 27341025 | 8000_Mixed | Chicken or turkey, potatoes, and vegetables including carrots, broccoli, and/or dark-green leafy; gravy                     | 60                 | 4                  | B           | 2             |
| 42301120 | 8000_Mixed | Peanut butter sandwich, with reduced fat peanut butter, on wheat bread                                                      | 60                 | 3.5                | C           | 4             |
| 42301125 | 8000_Mixed | Peanut butter sandwich, with reduced fat peanut butter, on whole wheat bread                                                | 60                 | 4                  | C           | 4             |
| 27416150 | 8000_Mixed | Pepper steak                                                                                                                | 60                 | 4.5                | B           | 2             |
| 58155320 | 8000_Mixed | Seafood paella, Puerto Rican style                                                                                          | 60                 | 3.5                | A           | 2             |
| 27415150 | 8000_Mixed | Beef chow mein or chop suey, no noodles                                                                                     | 60                 | 5                  | A           | 1             |
| 27111400 | 8000_Mixed | Chili con carne, NS as to beans                                                                                             | 60                 | 4.5                | A           | 1             |
| 58146371 | 8000_Mixed | Pasta with tomato-based sauce, seafood, and added vegetables, restaurant                                                    | 60                 | 3.5                | B           | 2             |
| 72201252 | 8000_Mixed | Broccoli, cooked, from frozen, with cream sauce                                                                             | 59                 | 4                  | A           | 1             |
| 75414012 | 8000_Mixed | Mushrooms, from frozen, creamed                                                                                             | 59                 | 4                  | B           | 2             |
| 58146752 | 8000_Mixed | Pasta, whole grain, with cream sauce, seafood, and added vegetables, home recipe                                            | 59                 | 3.5                | B           | 2             |
| 27320320 | 8000_Mixed | Pork, rice, and vegetables including carrots, broccoli, and/or dark-green leafy; soy-based sauce                            | 59                 | 4.5                | A           | 2             |
| 58146633 | 8000_Mixed | Pasta, whole grain, with tomato-based sauce, meat, and added vegetables, ready-to-heat                                      | 59                 | 4                  | A           | 4             |
| 58146361 | 8000_Mixed | Pasta with tomato-based sauce and seafood, restaurant                                                                       | 59                 | 3.5                | B           | 2             |
| 27341035 | 8000_Mixed | Chicken or turkey, potatoes, and vegetables including carrots, broccoli, and/or dark-green leafy; cream sauce, white sauce, | 59                 | 4                  | B           | 2             |
| 27111406 | 8000_Mixed | Chili con carne with beans, home recipe                                                                                     | 59                 | 4.5                | A           | 1             |
| 27250150 | 8000_Mixed | Tuna loaf                                                                                                                   | 59                 | 4                  | B           | 3             |
| 42301020 | 8000_Mixed | Peanut butter sandwich, with regular peanut butter, on wheat bread                                                          | 59                 | 2.5                | C           | 4             |
| 42301025 | 8000_Mixed | Peanut butter sandwich, with regular peanut butter, on whole wheat bread                                                    | 59                 | 2.5                | C           | 4             |
| 27450090 | 8000_Mixed | Tuna salad with cheese                                                                                                      | 59                 | 3                  | C           | 4             |
| 77316600 | 8000_Mixed | Eggplant and meat casserole                                                                                                 | 59                 | 4.5                | A           | 2             |
| 58146623 | 8000_Mixed | Pasta, whole grain, with tomato-based sauce and meat, ready-to-heat                                                         | 59                 | 4                  | A           | 4             |
| 58164860 | 8000_Mixed | Rice, brown, with soy-based sauce, NS as to fat added in cooking                                                            | 59                 | 3                  | C           | 2             |
| 58164880 | 8000_Mixed | Rice, brown, with soy-based sauce, fat added in cooking                                                                     | 59                 | 3                  | C           | 2             |
| 75140500 | 8000_Mixed | Broccoli salad with cauliflower, cheese, bacon bits, and dressing                                                           | 59                 | 3.5                | C           | 3             |
| 27311650 | 8000_Mixed | Beef, potatoes, and vegetables excluding carrots, broccoli, and dark-green leafy; soy-based sauce                           | 59                 | 4.5                | A           | 2             |
| 28340670 | 8000_Mixed | Chicken or turkey vegetable soup with rice, home recipe, Mexican style                                                      | 59                 | 4.5                | A           | 2             |
| 27341020 | 8000_Mixed | Chicken or turkey, potatoes, and vegetables excluding carrots, broccoli, and dark-green leafy; no sauce                     | 59                 | 4.5                | A           | 2             |
| 58150100 | 8000_Mixed | Bibimbap, Korean                                                                                                            | 59                 | 4.5                | B           | 2             |
| 75412060 | 8000_Mixed | Eggplant parmesan casserole, regular                                                                                        | 58                 | 4                  | B           | 2             |
| 27450065 | 8000_Mixed | Tuna salad, made with light creamy dressing                                                                                 | 58                 | 3.5                | B           | 4             |
| 27348100 | 8000_Mixed | Chicken fricassee, Puerto Rican style                                                                                       | 58                 | 4                  | C           | 2             |
| 27450070 | 8000_Mixed | Shrimp salad                                                                                                                | 58                 | 3                  | D           | 4             |
| 27336200 | 8000_Mixed | Venison or deer, potatoes, and vegetables including carrots, broccoli, and/or dark-green leafy; gravy                       | 58                 | 4.5                | B           | 2             |
| 27341320 | 8000_Mixed | Chicken or turkey stew with potatoes and vegetables excluding carrots, broccoli, and dark-green leafy; gravy                | 58                 | 5                  | A           | 2             |
| 32105200 | 8000_Mixed | Egg foo yung, NFS                                                                                                           | 58                 | 4                  | B           | 2             |
| 27446200 | 8000_Mixed | Chicken or turkey salad, made with mayonnaise                                                                               | 58                 | 3.5                | C           | 3             |
| 32105230 | 8000_Mixed | Shrimp egg foo yung                                                                                                         | 58                 | 4                  | B           | 2             |
| 28350050 | 8000_Mixed | Fish chowder                                                                                                                | 58                 | 4                  | A           | 2             |
| 75141005 | 8000_Mixed | Cabbage salad or coleslaw, made with light coleslaw dressing                                                                | 58                 | 4                  | C           | 3             |
| 58164840 | 8000_Mixed | Rice, brown, with gravy, fat not added in cooking                                                                           | 58                 | 3.5                | B           | 2             |
| 27320450 | 8000_Mixed | Ham, potatoes, and vegetables including carrots, broccoli, and/or dark-green leafy; no sauce                                | 58                 | 4                  | B           | 2             |
| 27315510 | 8000_Mixed | Beef, rice, and vegetables including carrots, broccoli, and/or dark-green leafy; soy-based sauce                            | 58                 | 4.5                | A           | 2             |
| 75416500 | 8000_Mixed | Pea salad                                                                                                                   | 58                 | 4                  | C           | 4             |
| 28345170 | 8000_Mixed | Duck soup                                                                                                                   | 58                 | 4                  | A           | 1             |
| 27362000 | 8000_Mixed | Stewed tripe, with potatoes, Puerto Rican style                                                                             | 58                 | 4.5                | B           | 3             |
| 27250450 | 8000_Mixed | Shrimp toast, fried                                                                                                         | 58                 | 3                  | C           | 2             |

| foodcode | level1nd   | Description                                                                                                                 | Food Compass Score | Health Star Rating | Nutri-Score | NOVA Category |
|----------|------------|-----------------------------------------------------------------------------------------------------------------------------|--------------------|--------------------|-------------|---------------|
| 58110200 | 8000_Mixed | Roll with meat and/or shrimp, vegetables and rice paper, not fried                                                          | 58                 | 4.5                | B           | 1             |
| 58160135 | 8000_Mixed | Rice with beans and beef                                                                                                    | 57                 | 5                  | A           | 2             |
| 27420170 | 8000_Mixed | Pork and onions with soy-based sauce                                                                                        | 57                 | 4.5                | A           | 2             |
| 27320040 | 8000_Mixed | Pork, potatoes, and vegetables including carrots, broccoli, and/or dark-green leafy; no sauce                               | 57                 | 4.5                | A           | 2             |
| 58100725 | 8000_Mixed | Enchilada with beans, green-chile or enchilada sauce                                                                        | 57                 | 4.5                | A           | 2             |
| 58401200 | 8000_Mixed | Barley soup, sweet, with or without nuts, Asian Style                                                                       | 57                 | 3.5                | B           | 1             |
| 27121410 | 8000_Mixed | Chili con carne with beans, made with pork                                                                                  | 57                 | 4.5                | A           | 1             |
| 41601090 | 8000_Mixed | Bean soup, with macaroni, home recipe, canned, or ready-to-serve                                                            | 57                 | 4.5                | A           | 2             |
| 27415130 | 8000_Mixed | Szechuan beef                                                                                                               | 57                 | 4.5                | A           | 1             |
| 27415140 | 8000_Mixed | Hunan beef                                                                                                                  | 57                 | 4.5                | A           | 1             |
| 58117510 | 8000_Mixed | Hayacas, Puerto Rican style                                                                                                 | 57                 | 4.5                | A           | 2             |
| 77250710 | 8000_Mixed | Tannier fritters, Puerto Rican style                                                                                        | 57                 | 4.5                | A           | 2             |
| 27336100 | 8000_Mixed | Venison or deer stew with potatoes and vegetables including carrots, broccoli, and/or dark-green leafy; tomato-based sauce  | 57                 | 5                  | A           | 1             |
| 27446220 | 8000_Mixed | Chicken or turkey salad with egg                                                                                            | 57                 | 3.5                | C           | 3             |
| 27313150 | 8000_Mixed | Beef, noodles, and vegetables including carrots, broccoli, and/or dark-green leafy; soy-based sauce                         | 57                 | 4.5                | A           | 2             |
| 77316010 | 8000_Mixed | Stuffed cabbage, with meat, Puerto Rican style                                                                              | 57                 | 4                  | C           | 2             |
| 77272010 | 8000_Mixed | Puerto Rican pasteles                                                                                                       | 57                 | 4                  | C           | 2             |
| 58302080 | 8000_Mixed | Noodles with vegetables in tomato-based sauce, diet frozen meal                                                             | 57                 | 4.5                | A           | 4             |
| 75403021 | 8000_Mixed | Beans, string, green, cooked, from fresh, with mushroom sauce                                                               | 57                 | 4.5                | B           | 1             |
| 27241000 | 8000_Mixed | Chicken or turkey hash                                                                                                      | 56                 | 5                  | A           | 3             |
| 72116230 | 8000_Mixed | Escarole, creamed                                                                                                           | 56                 | 4                  | B           | 1             |
| 27341030 | 8000_Mixed | Chicken or turkey, potatoes, and vegetables excluding carrots, broccoli, and dark-green leafy; gravy                        | 56                 | 4                  | B           | 2             |
| 27450510 | 8000_Mixed | Tuna casserole with vegetables and mushroom sauce, no noodles                                                               | 56                 | 3.5                | B           | 2             |
| 58134310 | 8000_Mixed | Stuffed shells, with fish and/or shellfish, with tomato sauce                                                               | 56                 | 4                  | A           | 2             |
| 27446240 | 8000_Mixed | Chicken or turkey salad, made with creamy dressing                                                                          | 56                 | 3                  | C           | 3             |
| 73102251 | 8000_Mixed | Carrots, cooked, from fresh, with cheese sauce                                                                              | 56                 | 4                  | B           | 3             |
| 77316510 | 8000_Mixed | Stuffed cabbage, with meat and rice, Syrian dish, Puerto Rican style                                                        | 56                 | 4.5                | A           | 1             |
| 58101820 | 8000_Mixed | Mexican casserole made with ground beef, beans, tomato sauce, cheese, taco seasonings, and corn chips                       | 56                 | 4                  | B           | 2             |
| 28320300 | 8000_Mixed | Pork with vegetable excluding carrots, broccoli and/or dark-green leafy; soup, Asian Style                                  | 56                 | 4.5                | B           | 2             |
| 75652010 | 8000_Mixed | Vegetable beef soup, home recipe                                                                                            | 56                 | 4.5                | A           | 2             |
| 27320330 | 8000_Mixed | Pork, rice, and vegetables excluding carrots, broccoli, and dark-green leafy; soy-based sauce                               | 56                 | 4.5                | A           | 2             |
| 58146741 | 8000_Mixed | Pasta, whole grain, with cream sauce and seafood, restaurant                                                                | 56                 | 2.5                | C           | 3             |
| 27311110 | 8000_Mixed | Beef, potatoes, and vegetables including carrots, broccoli, and/or dark-green leafy; no sauce                               | 56                 | 4.5                | A           | 2             |
| 27416250 | 8000_Mixed | Beef salad                                                                                                                  | 56                 | 3.5                | C           | 3             |
| 28311030 | 8000_Mixed | Menudo soup, canned, prepared with water or ready-to-serve                                                                  | 56                 | 3.5                | B           | 1             |
| 27336150 | 8000_Mixed | Venison or deer stew with potatoes and vegetables excluding carrots, broccoli, and dark-green leafy; tomato-based sauce     | 56                 | 5                  | A           | 1             |
| 75145000 | 8000_Mixed | Seven-layer salad, lettuce salad made with a combination of onion, celery, green pepper, peas, mayonnaise, cheese, eggs, a  | 56                 | 4                  | C           | 3             |
| 27320140 | 8000_Mixed | Pork, potatoes, and vegetables including carrots, broccoli, and/or dark-green leafy; gravy                                  | 56                 | 4.5                | B           | 2             |
| 58146301 | 8000_Mixed | Pasta with tomato-based sauce, and added vegetables, restaurant                                                             | 55                 | 4                  | B           | 2             |
| 73102252 | 8000_Mixed | Carrots, cooked, from frozen, with cheese sauce                                                                             | 55                 | 4                  | B           | 3             |
| 73102250 | 8000_Mixed | Carrots, cooked, NS as to form, with cheese sauce                                                                           | 55                 | 4                  | B           | 3             |
| 27141000 | 8000_Mixed | Chicken or turkey cacciatore                                                                                                | 55                 | 4.5                | B           | 2             |
| 75460700 | 8000_Mixed | Vegetable combinations, including carrots, broccoli, and/or dark-green leafy; cooked, with pasta                            | 55                 | 4.5                | A           | 3             |
| 58146221 | 8000_Mixed | Pasta with tomato-based sauce, restaurant                                                                                   | 55                 | 4                  | B           | 2             |
| 75403010 | 8000_Mixed | Beans, string, green, NS as to form, creamed or with cheese sauce                                                           | 55                 | 4                  | B           | 2             |
| 27311600 | 8000_Mixed | Beef, potatoes, and vegetables including carrots, broccoli, and/or dark-green leafy; gravy                                  | 55                 | 4.5                | B           | 2             |
| 41601030 | 8000_Mixed | Black bean soup, home recipe, canned or ready-to-serve                                                                      | 55                 | 4.5                | A           | 4             |
| 75402021 | 8000_Mixed | Beans, lima, immature, cooked, from fresh, with mushroom sauce                                                              | 55                 | 4.5                | A           | 1             |
| 27341040 | 8000_Mixed | Chicken or turkey, potatoes, and vegetables excluding carrots, broccoli, and dark-green leafy; cream sauce, white sauce, or | 55                 | 4.5                | B           | 2             |
| 58162140 | 8000_Mixed | Stuffed tomato, with rice, meatless                                                                                         | 55                 | 4.5                | B           | 2             |
| 75403012 | 8000_Mixed | Beans, string, green, from frozen, creamed or with cheese sauce                                                             | 55                 | 4                  | B           | 2             |
| 75601100 | 8000_Mixed | Borscht                                                                                                                     | 55                 | 4.5                | B           | 2             |
| 27250300 | 8000_Mixed | Mackerel cake or patty                                                                                                      | 55                 | 3.5                | C           | 3             |
| 58130810 | 8000_Mixed | Lasagna, meatless, whole wheat noodles                                                                                      | 55                 | 3.5                | C           | 2             |
| 27336250 | 8000_Mixed | Venison or deer, potatoes, and vegetables excluding carrots, broccoli, and dark-green leafy; gravy                          | 55                 | 4.5                | B           | 2             |
| 75649150 | 8000_Mixed | Vegetable noodle soup, home recipe                                                                                          | 55                 | 4.5                | B           | 2             |
| 74602200 | 8000_Mixed | Tomato soup, canned, reduced sodium, prepared with water, or ready-to-serve                                                 | 55                 | 4.5                | B           | 4             |
| 75403020 | 8000_Mixed | Beans, string, green, cooked, NS as to form, with mushroom sauce                                                            | 55                 | 4.5                | B           | 2             |
| 75403022 | 8000_Mixed | Beans, string, green, cooked, from frozen, with mushroom sauce                                                              | 55                 | 4.5                | B           | 2             |
| 28315140 | 8000_Mixed | Beef vegetable soup, home recipe, Mexican style                                                                             | 55                 | 4.5                | A           | 2             |
| 58421020 | 8000_Mixed | Sopa de Fideo Aguada, Mexican style noodle soup, home recipe                                                                | 55                 | 4.5                | A           | 2             |
| 27311610 | 8000_Mixed | Beef, potatoes, and vegetables including carrots, broccoli, and/or dark-green leafy; cream sauce, white sauce, or mushroom  | 55                 | 4.5                | B           | 2             |
| 75404012 | 8000_Mixed | Beans, string, yellow, from frozen, creamed or with cheese sauce                                                            | 55                 | 4                  | B           | 2             |
| 27343510 | 8000_Mixed | Chicken or turkey, noodles, and vegetables including carrots, broccoli, and/or dark-green leafy; tomato-based sauce         | 55                 | 4                  | A           | 2             |
| 27335500 | 8000_Mixed | Stewed rabbit, Puerto Rican style                                                                                           | 55                 | 4.5                | B           | 2             |
| 73111031 | 8000_Mixed | Peas and carrots, from fresh, creamed                                                                                       | 55                 | 4                  | B           | 1             |
| 77205110 | 8000_Mixed | Ripe plantain fritters, Puerto Rican style                                                                                  | 55                 | 3.5                | D           | 2             |
| 75404010 | 8000_Mixed | Beans, string, yellow, NS as to form, creamed or with cheese sauce                                                          | 54                 | 4                  | B           | 2             |
| 27448020 | 8000_Mixed | Chicken or turkey fricassee, with sauce, no potatoes, potatoes reported separately, Puerto Rican style                      | 54                 | 3.5                | C           | 2             |
| 14620310 | 8000_Mixed | Topping from vegetable pizza                                                                                                | 54                 | 3.5                | D           | 3             |
| 58148140 | 8000_Mixed | Macaroni or pasta salad with crab meat                                                                                      | 54                 | 3.5                | B           | 3             |
| 75410500 | 8000_Mixed | Chiles rellenos, cheese-filled                                                                                              | 54                 | 3.5                | C           | 2             |
| 27446320 | 8000_Mixed | Chicken or turkey, breaded, fried, garden salad with bacon and cheese, chicken and/or turkey, bacon, cheese, lettuce and/c  | 54                 | 4.5                | A           | 3             |
| 27418210 | 8000_Mixed | Beef stew with vegetables excluding potatoes, Puerto Rican style                                                            | 54                 | 4.5                | C           | 2             |
| 58146742 | 8000_Mixed | Pasta, whole grain, with cream sauce and seafood, home recipe                                                               | 54                 | 3.5                | B           | 2             |
| 75409010 | 8000_Mixed | Cauliflower, NS as to form, creamed                                                                                         | 54                 | 4                  | B           | 1             |
| 27550110 | 8000_Mixed | Crab cake sandwich, on bun                                                                                                  | 54                 | 3.5                | B           | 3             |
| 75409012 | 8000_Mixed | Cauliflower, from frozen, creamed                                                                                           | 54                 | 4                  | B           | 1             |
| 27246505 | 8000_Mixed | Meat loaf made with chicken or turkey, with tomato-based sauce                                                              | 54                 | 3.5                | B           | 2             |
| 27315520 | 8000_Mixed | Beef, rice, and vegetables excluding carrots, broccoli, and dark-green leafy; soy-based sauce                               | 54                 | 4.5                | A           | 2             |
| 27463000 | 8000_Mixed | Stewed gizzards, Puerto Rican style                                                                                         | 54                 | 4.5                | B           | 3             |
| 58155910 | 8000_Mixed | Rice with squid, Puerto Rican style                                                                                         | 54                 | 3                  | C           | 2             |
| 27420350 | 8000_Mixed | Pork and vegetables excluding carrots, broccoli, and dark-green leafy; no potatoes, no sauce                                | 54                 | 4.5                | A           | 2             |
| 73102231 | 8000_Mixed | Carrots, cooked, from fresh, creamed                                                                                        | 54                 | 4                  | B           | 1             |
| 27243600 | 8000_Mixed | Chicken or turkey and rice with soy-based sauce                                                                             | 54                 | 3.5                | B           | 2             |
| 27320210 | 8000_Mixed | Pork, potatoes, and vegetables excluding carrots, broccoli, and dark-green leafy; no sauce                                  | 54                 | 4.5                | A           | 2             |
| 58146351 | 8000_Mixed | Pasta with tomato-based sauce, poultry, and added vegetables, restaurant                                                    | 54                 | 4                  | B           | 2             |
| 55702000 | 8000_Mixed | Cake or pancake made with rice flour and/or dried beans                                                                     | 54                 | 5                  | A           | 1             |
| 58148130 | 8000_Mixed | Macaroni or pasta salad with tuna                                                                                           | 54                 | 3.5                | B           | 3             |
| 58162120 | 8000_Mixed | Stuffed pepper, with rice, meatless                                                                                         | 54                 | 4                  | C           | 3             |
| 58165470 | 8000_Mixed | Rice, brown, with vegetables, soy-based sauce, fat not added in cooking                                                     | 54                 | 4                  | B           | 2             |
| 58146341 | 8000_Mixed | Pasta with tomato-based sauce and poultry, restaurant                                                                       | 54                 | 3.5                | B           | 2             |
| 27363000 | 8000_Mixed | Gumbo with rice                                                                                                             | 54                 | 4                  | A           | 2             |
| 28310170 | 8000_Mixed | Beef broth, without tomato, home recipe                                                                                     | 53                 | 3.5                | B           | 1             |
| 58128210 | 8000_Mixed | Dressing with oysters                                                                                                       | 53                 | 3                  | C           | 3             |
| 27246300 | 8000_Mixed | Chicken or turkey cake, patty, or croquette                                                                                 | 53                 | 3.5                | D           | 3             |
| 27446230 | 8000_Mixed | Chicken or turkey salad, made with mayonnaise-type salad dressing                                                           | 53                 | 3.5                | B           | 2             |
| 27121000 | 8000_Mixed | Pork with chili and tomatoes                                                                                                | 53                 | 4.5                | A           | 2             |
| 75403023 | 8000_Mixed | Beans, string, green, cooked, from canned, with mushroom sauce                                                              | 53                 | 4                  | C           | 2             |
| 27360100 | 8000_Mixed | Brunswick stew                                                                                                              | 53                 | 4.5                | A           | 2             |
| 75141300 | 8000_Mixed | Cabbage, Chinese, salad, with dressing                                                                                      | 53                 | 3.5                | C           | 2             |
| 27242500 | 8000_Mixed | Chicken or turkey and noodles with soy-based sauce                                                                          | 53                 | 3.5                | B           | 2             |

| foodcode | level1nd   | Description                                                                                                                | Food Compass Score | Health Star Rating | Nutri-Score | NOVA Category |
|----------|------------|----------------------------------------------------------------------------------------------------------------------------|--------------------|--------------------|-------------|---------------|
| 27442120 | 8000_Mixed | Chicken or turkey and vegetables excluding carrots, broccoli, and dark-green leafy; no potatoes, gravy                     | 53                 | 4                  | B           | 2             |
| 27460510 | 8000_Mixed | Antipasto with ham, fish, cheese, vegetables                                                                               | 53                 | 2.5                | D           | 3             |
| 27241010 | 8000_Mixed | Chicken or turkey and potatoes with gravy                                                                                  | 53                 | 4                  | B           | 2             |
| 27313160 | 8000_Mixed | Beef, noodles, and vegetables excluding carrots, broccoli, and dark-green leafy; soy-based sauce                           | 53                 | 4.5                | A           | 2             |
| 58146362 | 8000_Mixed | Pasta with tomato-based sauce and seafood, home recipe                                                                     | 53                 | 4                  | A           | 2             |
| 27120150 | 8000_Mixed | Pork or ham with soy-based sauce                                                                                           | 53                 | 3.5                | B           | 2             |
| 27336300 | 8000_Mixed | Venison or deer, noodles, and vegetables including carrots, broccoli, and/or dark-green leafy; tomato-based sauce          | 53                 | 4                  | A           | 2             |
| 27150170 | 8000_Mixed | Sweet and sour shrimp                                                                                                      | 53                 | 3                  | C           | 2             |
| 75417022 | 8000_Mixed | Peas, cooked, from frozen, with mushroom sauce                                                                             | 53                 | 4.5                | A           | 2             |
| 73102232 | 8000_Mixed | Carrots, cooked, from frozen, creamed                                                                                      | 53                 | 4                  | B           | 1             |
| 75407010 | 8000_Mixed | Cabbage, creamed                                                                                                           | 53                 | 4                  | B           | 1             |
| 73102230 | 8000_Mixed | Carrots, cooked, NS as to form, creamed                                                                                    | 53                 | 4                  | B           | 1             |
| 27550750 | 8000_Mixed | Tuna salad submarine sandwich, with lettuce and tomato                                                                     | 53                 | 3.5                | B           | 4             |
| 77563010 | 8000_Mixed | Puerto Rican stew                                                                                                          | 53                 | 4.5                | A           | 2             |
| 27540260 | 8000_Mixed | Chicken fillet, broiled, sandwich, on oat bran bun, with lettuce, tomato, spread                                           | 53                 | 4                  | B           | 3             |
| 27550751 | 8000_Mixed | Tuna salad submarine sandwich, with cheese, lettuce and tomato                                                             | 53                 | 3.5                | B           | 3             |
| 75417020 | 8000_Mixed | Peas, cooked, NS as to form, with mushroom sauce                                                                           | 53                 | 4.5                | A           | 2             |
| 58124250 | 8000_Mixed | Spanakopitta                                                                                                               | 53                 | 3                  | D           | 2             |
| 27446225 | 8000_Mixed | Chicken or turkey salad, made with light mayonnaise                                                                        | 53                 | 3.5                | B           | 2             |
| 27446235 | 8000_Mixed | Chicken or turkey salad, made with light mayonnaise-type salad dressing                                                    | 53                 | 3.5                | B           | 2             |
| 27414100 | 8000_Mixed | Beef with vegetables including carrots, broccoli, and/or dark-green leafy; no potatoes, mushroom sauce                     | 53                 | 3.5                | B           | 2             |
| 28320160 | 8000_Mixed | Pork vegetable soup with potato, pasta, or rice, stew type, chunky style                                                   | 53                 | 4.5                | A           | 2             |
| 42302160 | 8000_Mixed | Peanut butter and jelly sandwich, with reduced fat peanut butter, reduced sugar jelly, on wheat bread                      | 53                 | 3.5                | C           | 4             |
| 42302165 | 8000_Mixed | Peanut butter and jelly sandwich, with reduced fat peanut butter, reduced sugar jelly, on whole wheat bread                | 53                 | 3.5                | C           | 4             |
| 27350060 | 8000_Mixed | Shrimp creole, with rice                                                                                                   | 52                 | 3.5                | A           | 3             |
| 75417011 | 8000_Mixed | Peas, from fresh, creamed                                                                                                  | 52                 | 4                  | A           | 1             |
| 58146732 | 8000_Mixed | Pasta, whole grain, with cream sauce, poultry, and added vegetables, home recipe                                           | 52                 | 3.5                | A           | 2             |
| 27416450 | 8000_Mixed | Beef and vegetables including carrots, broccoli, and/or dark-green leafy; no potatoes, gravy                               | 52                 | 4                  | A           | 2             |
| 75412010 | 8000_Mixed | Eggplant, batter-dipped, fried                                                                                             | 52                 | 4.5                | A           | 2             |
| 27250050 | 8000_Mixed | Fish cake or patty, NS as to fish                                                                                          | 52                 | 4                  | B           | 3             |
| 27250310 | 8000_Mixed | Haddock cake or patty                                                                                                      | 52                 | 4                  | B           | 3             |
| 27420390 | 8000_Mixed | Pork chow mein or chop suey, no noodles                                                                                    | 52                 | 4.5                | A           | 1             |
| 27150160 | 8000_Mixed | Shrimp with lobster sauce                                                                                                  | 52                 | 2                  | D           | 2             |
| 27410220 | 8000_Mixed | Beef and vegetables excluding carrots, broccoli, and dark-green leafy; no potatoes, no sauce                               | 52                 | 4.5                | A           | 2             |
| 27142200 | 8000_Mixed | Turkey with gravy                                                                                                          | 52                 | 4                  | A           | 2             |
| 58160160 | 8000_Mixed | Hopping John                                                                                                               | 52                 | 5                  | A           | 2             |
| 28143180 | 8000_Mixed | Chicken in butter sauce with potatoes and vegetable, diet frozen meal                                                      | 52                 | 4.5                | A           | 4             |
| 58148160 | 8000_Mixed | Macaroni or pasta salad with tuna and egg                                                                                  | 52                 | 3.5                | B           | 3             |
| 27343520 | 8000_Mixed | Chicken or turkey, noodles, and vegetables excluding carrots, broccoli, and dark-green leafy; tomato-based sauce           | 52                 | 4                  | B           | 2             |
| 58151420 | 8000_Mixed | Sushi, topped with salmon                                                                                                  | 52                 | 3.5                | A           | 2             |
| 71931010 | 8000_Mixed | Cassava with creole sauce, Puerto Rican style                                                                              | 52                 | 4                  | B           | 2             |
| 27250120 | 8000_Mixed | Shrimp and noodles, no sauce                                                                                               | 52                 | 4                  | A           | 2             |
| 77230510 | 8000_Mixed | Cassava fritter stuffed with crab meat, Puerto Rican style                                                                 | 52                 | 3.5                | D           | 2             |
| 27146160 | 8000_Mixed | Chicken with mole sauce                                                                                                    | 52                 | 4                  | B           | 2             |
| 58137240 | 8000_Mixed | Pad Thai with seafood                                                                                                      | 52                 | 4                  | B           | 2             |
| 73111030 | 8000_Mixed | Peas and carrots, NS as to form, creamed                                                                                   | 52                 | 4                  | B           | 1             |
| 73111032 | 8000_Mixed | Peas and carrots, from frozen, creamed                                                                                     | 52                 | 4                  | B           | 1             |
| 75418010 | 8000_Mixed | Squash, summer, yellow or green, breaded or battered, fried                                                                | 52                 | 4                  | B           | 2             |
| 72308000 | 8000_Mixed | Dark-green leafy vegetable soup with meat, Asian style                                                                     | 52                 | 5                  | A           | 2             |
| 74602300 | 8000_Mixed | Tomato soup, canned, reduced sodium, prepared with milk                                                                    | 52                 | 3.5                | B           | 2             |
| 27420250 | 8000_Mixed | Ham and vegetables including carrots broccoli, and/or dark-green leafy; no potatoes, no sauce                              | 52                 | 3.5                | C           | 3             |
| 27311120 | 8000_Mixed | Beef, potatoes, and vegetables, excluding carrots, broccoli, and dark-green leafy; no sauce                                | 52                 | 4.5                | A           | 2             |
| 27320150 | 8000_Mixed | Pork, potatoes, and vegetables excluding carrots, broccoli, and dark-green leafy; gravy                                    | 52                 | 4.5                | B           | 2             |
| 42302110 | 8000_Mixed | Peanut butter and jelly sandwich, with regular peanut butter, reduced sugar jelly, on wheat bread                          | 52                 | 2.5                | C           | 4             |
| 42302115 | 8000_Mixed | Peanut butter and jelly sandwich, with regular peanut butter, reduced sugar jelly, on whole wheat bread                    | 52                 | 2.5                | C           | 4             |
| 58100625 | 8000_Mixed | Enchilada with chicken and beans, green-chile or enchilada sauce                                                           | 52                 | 4.5                | A           | 2             |
| 27250810 | 8000_Mixed | Fish and rice with tomato-based sauce                                                                                      | 52                 | 3.5                | B           | 2             |
| 75409013 | 8000_Mixed | Cauliflower, from canned, creamed                                                                                          | 52                 | 4                  | B           | 3             |
| 27336310 | 8000_Mixed | Venison or deer, noodles, and vegetables excluding carrots, broccoli, and dark-green leafy; tomato-based sauce             | 51                 | 4                  | A           | 2             |
| 27311620 | 8000_Mixed | Beef, potatoes, and vegetables excluding carrots, broccoli, and dark-green leafy; cream sauce, white sauce, or mushroom s: | 51                 | 4.5                | B           | 2             |
| 74203011 | 8000_Mixed | Tomatoes, from fresh, scalloped                                                                                            | 51                 | 4                  | C           | 3             |
| 14620300 | 8000_Mixed | Topping from cheese pizza                                                                                                  | 51                 | 2                  | D           | 3             |
| 27250270 | 8000_Mixed | Clams Casino                                                                                                               | 51                 | 4                  | A           | 4             |
| 72202030 | 8000_Mixed | Broccoli, batter-dipped and fried                                                                                          | 51                 | 4.5                | A           | 3             |
| 27246500 | 8000_Mixed | Meat loaf made with chicken or turkey                                                                                      | 51                 | 3.5                | C           | 2             |
| 75439010 | 8000_Mixed | Vegetable stew without meat                                                                                                | 51                 | 4.5                | A           | 2             |
| 75404011 | 8000_Mixed | Beans, string, yellow, from fresh, creamed or with cheese sauce                                                            | 51                 | 4                  | B           | 2             |
| 58115150 | 8000_Mixed | Tamal in a leaf, Puerto Rican style                                                                                        | 51                 | 4                  | A           | 2             |
| 58146692 | 8000_Mixed | Pasta, whole grain, with cream sauce, and added vegetables, home recipe                                                    | 51                 | 3.5                | B           | 2             |
| 58165400 | 8000_Mixed | Rice, brown, with vegetables, cheese and/or cream based sauce, NS as to fat added in cooking                               | 51                 | 3.5                | B           | 2             |
| 58165420 | 8000_Mixed | Rice, brown, with vegetables, cheese and/or cream based sauce, fat added in cooking                                        | 51                 | 3.5                | B           | 2             |
| 27320410 | 8000_Mixed | Ham, potatoes, and vegetables excluding carrots, broccoli, and dark-green leafy; no sauce                                  | 51                 | 4                  | B           | 2             |
| 27420520 | 8000_Mixed | Pork shish kabob with vegetables, excluding potatoes                                                                       | 51                 | 4.5                | A           | 2             |
| 75403013 | 8000_Mixed | Beans, string, green, from canned, creamed or with cheese sauce                                                            | 51                 | 4                  | C           | 2             |
| 27345510 | 8000_Mixed | Chicken or turkey, rice, and vegetables including carrots, broccoli, and/or dark-green leafy; tomato-based sauce           | 51                 | 4                  | B           | 2             |
| 58130610 | 8000_Mixed | Lasagna with meat, whole wheat noodles                                                                                     | 51                 | 3.5                | C           | 2             |
| 27311605 | 8000_Mixed | Beef, potatoes, and vegetables excluding carrots, broccoli, and dark-green leafy; gravy                                    | 51                 | 4.5                | B           | 2             |
| 75402011 | 8000_Mixed | Beans, lima, immature, from fresh, creamed or with cheese sauce                                                            | 51                 | 5                  | A           | 1             |
| 41602070 | 8000_Mixed | Split pea soup, canned, reduced sodium, prepared with water or ready-to-serve                                              | 50                 | 4.5                | A           | 4             |
| 58100720 | 8000_Mixed | Enchilada with beans, meatless, red-chile or enchilada sauce                                                               | 50                 | 4.5                | A           | 3             |
| 27232000 | 8000_Mixed | Lamb or mutton and potatoes with tomato-based sauce                                                                        | 50                 | 4.5                | B           | 2             |
| 77250110 | 8000_Mixed | Stuffed tannier fritters, Puerto Rican style                                                                               | 50                 | 3                  | D           | 2             |
| 28310230 | 8000_Mixed | Meatball soup, home recipe, Mexican style                                                                                  | 50                 | 4.5                | A           | 2             |
| 58148116 | 8000_Mixed | Macaroni or pasta salad, made with creamy dressing                                                                         | 50                 | 4                  | B           | 3             |
| 27446245 | 8000_Mixed | Chicken or turkey salad, made with light creamy dressing                                                                   | 50                 | 3.5                | B           | 2             |
| 28355310 | 8000_Mixed | Oyster stew                                                                                                                | 50                 | 3                  | C           | 2             |
| 58174100 | 8000_Mixed | Dosa (Indian), with filling                                                                                                | 50                 | 4.5                | A           | 2             |
| 58146751 | 8000_Mixed | Pasta, whole grain, with cream sauce, seafood, and added vegetables, restaurant                                            | 50                 | 3                  | C           | 4             |
| 42301015 | 8000_Mixed | Peanut butter sandwich, with regular peanut butter, on white bread                                                         | 50                 | 2.5                | D           | 3             |
| 27115000 | 8000_Mixed | Beef with soy-based sauce                                                                                                  | 50                 | 3.5                | B           | 2             |
| 27211100 | 8000_Mixed | Beef stew with potatoes, tomato-based sauce                                                                                | 50                 | 4.5                | A           | 2             |
| 42301010 | 8000_Mixed | Peanut butter sandwich, NFS                                                                                                | 50                 | 2.5                | D           | 3             |
| 27450130 | 8000_Mixed | Crab salad made with imitation crab                                                                                        | 50                 | 3.5                | C           | 4             |
| 58146372 | 8000_Mixed | Pasta with tomato-based sauce, seafood, and added vegetables, home recipe                                                  | 50                 | 4                  | A           | 2             |
| 75646010 | 8000_Mixed | Shav soup                                                                                                                  | 50                 | 4                  | B           | 2             |
| 27311210 | 8000_Mixed | Corned beef, potatoes, and vegetables including carrots, broccoli, and/or dark-green leafy; no sauce                       | 50                 | 4                  | B           | 2             |
| 41601180 | 8000_Mixed | Bean and ham soup, home recipe                                                                                             | 50                 | 4.5                | A           | 2             |
| 42301115 | 8000_Mixed | Peanut butter sandwich, with reduced fat peanut butter, on white bread                                                     | 50                 | 3.5                | C           | 3             |
| 77205610 | 8000_Mixed | Ripe plantain meat pie, Puerto Rican style                                                                                 | 50                 | 3.5                | D           | 2             |
| 75410530 | 8000_Mixed | Chiles rellenos, filled with meat and cheese                                                                               | 50                 | 3.5                | C           | 2             |
| 27446250 | 8000_Mixed | Chicken or turkey salad, made with Italian dressing                                                                        | 50                 | 3.5                | C           | 2             |
| 58146160 | 8000_Mixed | Pasta with vegetables, no sauce or dressing                                                                                | 50                 | 4.5                | A           | 2             |



| foodcode | level1nd   | Description                                                                                                               | Food Compass Score | Health Star Rating | Nutri-Score | NOVA Category |
|----------|------------|---------------------------------------------------------------------------------------------------------------------------|--------------------|--------------------|-------------|---------------|
| 58162090 | 8000_Mixed | Stuffed pepper, with meat                                                                                                 | 50                 | 4                  | C           | 2             |
| 75410010 | 8000_Mixed | Celery, creamed                                                                                                           | 50                 | 4                  | B           | 1             |
| 27311410 | 8000_Mixed | Beef stew with potatoes and vegetables including carrots, broccoli, and/or dark-green leafy; gravy                        | 50                 | 4.5                | A           | 2             |
| 27420010 | 8000_Mixed | Cabbage with ham hocks                                                                                                    | 50                 | 4.5                | A           | 3             |
| 75413010 | 8000_Mixed | Kohlrabi, creamed                                                                                                         | 50                 | 4                  | B           | 2             |
| 27111405 | 8000_Mixed | Chili con carne with beans, from restaurant                                                                               | 50                 | 4                  | C           | 1             |
| 75409011 | 8000_Mixed | Cauliflower, from fresh, creamed                                                                                          | 50                 | 4                  | B           | 1             |
| 58137220 | 8000_Mixed | Pad Thai, meatless                                                                                                        | 50                 | 4                  | B           | 2             |
| 75402022 | 8000_Mixed | Beans, lima, immature, cooked, from frozen, with mushroom sauce                                                           | 50                 | 4.5                | A           | 1             |
| 42302060 | 8000_Mixed | Peanut butter and jelly sandwich, with reduced fat peanut butter, regular jelly, on wheat bread                           | 50                 | 2.5                | C           | 4             |
| 42302065 | 8000_Mixed | Peanut butter and jelly sandwich, with reduced fat peanut butter, regular jelly, on whole wheat bread                     | 50                 | 2.5                | C           | 4             |
| 73102253 | 8000_Mixed | Carrots, cooked, from canned, with cheese sauce                                                                           | 50                 | 3.5                | C           | 3             |
| 27460490 | 8000_Mixed | Julienne salad, meat, cheese, eggs, vegetables, no dressing                                                               | 49                 | 4                  | B           | 2             |
| 27260500 | 8000_Mixed | Vienna sausages stewed with potatoes, Puerto Rican style                                                                  | 49                 | 4                  | C           | 2             |
| 28340600 | 8000_Mixed | Chicken or turkey vegetable soup, canned, prepared with water or ready-to-serve                                           | 49                 | 4.5                | B           | 4             |
| 27111310 | 8000_Mixed | Beef stew, no potatoes, tomato-based sauce, with chili peppers, Mexican style                                             | 49                 | 4.5                | A           | 3             |
| 27420270 | 8000_Mixed | Ham and vegetables excluding carrots, broccoli, and dark-green leafy; no potatoes, no sauce                               | 49                 | 3.5                | C           | 2             |
| 27242400 | 8000_Mixed | Chicken or turkey and noodles with tomato-based sauce                                                                     | 49                 | 3.5                | A           | 2             |
| 77201210 | 8000_Mixed | Green plantain with cracklings, Puerto Rican style                                                                        | 49                 | 3.5                | D           | 3             |
| 27111200 | 8000_Mixed | Beef burgundy                                                                                                             | 49                 | 4                  | B           | 2             |
| 58146712 | 8000_Mixed | Pasta, whole grain, with cream sauce, meat, and added vegetables, home recipe                                             | 49                 | 3.5                | B           | 2             |
| 27448030 | 8000_Mixed | Chicken or turkey fricassee, no sauce, no potatoes, Puerto Rican style                                                    | 49                 | 3.5                | D           | 2             |
| 58148150 | 8000_Mixed | Macaroni or pasta salad with shrimp                                                                                       | 49                 | 3.5                | B           | 3             |
| 58101830 | 8000_Mixed | Mexican casserole made with ground beef, tomato sauce, cheese, taco seasonings, and corn chips                            | 49                 | 3                  | C           | 2             |
| 75652040 | 8000_Mixed | Vegetable beef soup with noodles or pasta, home recipe                                                                    | 49                 | 4.5                | A           | 2             |
| 42302020 | 8000_Mixed | Peanut butter and jelly sandwich, with regular peanut butter, regular jelly, on wheat bread                               | 49                 | 2.5                | C           | 4             |
| 42302025 | 8000_Mixed | Peanut butter and jelly sandwich, with regular peanut butter, regular jelly, on whole wheat bread                         | 49                 | 2.5                | C           | 4             |
| 58100525 | 8000_Mixed | Enchilada with meat and beans, green-chile or enchilada sauce                                                             | 49                 | 4.5                | A           | 2             |
| 27320070 | 8000_Mixed | Ham or pork, noodles, and vegetables including carrots, broccoli, and/or dark-green leafy; tomato-based sauce             | 49                 | 4                  | A           | 2             |
| 75415100 | 8000_Mixed | Celery, stuffed with cheese                                                                                               | 49                 | 4                  | C           | 3             |
| 27220510 | 8000_Mixed | Ham or pork and potatoes with gravy                                                                                       | 49                 | 4                  | B           | 2             |
| 75649010 | 8000_Mixed | Vegetable soup, canned, prepared with water or ready-to-serve                                                             | 49                 | 4.5                | B           | 4             |
| 27410250 | 8000_Mixed | Beef shish kabob with vegetables, excluding potatoes                                                                      | 49                 | 4.5                | A           | 2             |
| 58403040 | 8000_Mixed | Chicken or turkey noodle soup, home recipe                                                                                | 49                 | 3.5                | B           | 2             |
| 75656020 | 8000_Mixed | Vegetable soup, chunky style                                                                                              | 49                 | 4.5                | B           | 4             |
| 27111410 | 8000_Mixed | Chili con carne with beans                                                                                                | 49                 | 4.5                | A           | 1             |
| 58151410 | 8000_Mixed | Sushi, topped with eel                                                                                                    | 49                 | 3.5                | B           | 2             |
| 27446400 | 8000_Mixed | Chicken or turkey and vegetables including carrots, broccoli, and/or dark-green leafy; no potatoes, cheese sauce          | 49                 | 3.5                | B           | 2             |
| 58146321 | 8000_Mixed | Pasta with tomato-based sauce and meat, restaurant                                                                        | 49                 | 3.5                | B           | 2             |
| 75403011 | 8000_Mixed | Beans, string, green, from fresh, creamed or with cheese sauce                                                            | 49                 | 4                  | B           | 2             |
| 75418051 | 8000_Mixed | Squash, summer, from fresh, creamed                                                                                       | 49                 | 4                  | B           | 1             |
| 27133010 | 8000_Mixed | Stewed goat, Puerto Rican style                                                                                           | 48                 | 2                  | D           | 2             |
| 27311320 | 8000_Mixed | Beef stew with potatoes and vegetables excluding carrots, broccoli, and dark-green leafy; tomato-based sauce              | 48                 | 4.5                | A           | 2             |
| 74606020 | 8000_Mixed | Tomato vegetable soup with noodles, prepared with water                                                                   | 48                 | 4                  | C           | 4             |
| 73102233 | 8000_Mixed | Carrots, cooked, from canned, creamed                                                                                     | 48                 | 3.5                | C           | 1             |
| 75402020 | 8000_Mixed | Beans, lima, immature, cooked, NS as to form, with mushroom sauce                                                         | 48                 | 4.5                | A           | 2             |
| 58164800 | 8000_Mixed | Rice, brown, with cheese and/or cream based sauce, NS as to fat added in cooking                                          | 48                 | 3.5                | B           | 2             |
| 58164820 | 8000_Mixed | Rice, brown, with cheese and/or cream based sauce, fat added in cooking                                                   | 48                 | 3.5                | B           | 2             |
| 28340550 | 8000_Mixed | Sweet and sour soup                                                                                                       | 48                 | 3.5                | B           | 2             |
| 28350210 | 8000_Mixed | Clam chowder, NS as to Manhattan or New England style                                                                     | 48                 | 3.5                | B           | 2             |
| 58164870 | 8000_Mixed | Rice, brown, with soy-based sauce, fat not added in cooking                                                               | 48                 | 3                  | C           | 2             |
| 75450510 | 8000_Mixed | Vegetable combination, excluding carrots, broccoli, and dark-green leafy; cooked, with cream sauce                        | 48                 | 4                  | B           | 1             |
| 28355120 | 8000_Mixed | Clam chowder, New England, prepared with milk                                                                             | 48                 | 3.5                | B           | 2             |
| 27430610 | 8000_Mixed | Lamb shish kabob with vegetables, excluding potatoes                                                                      | 48                 | 4.5                | A           | 2             |
| 27420450 | 8000_Mixed | Sausage and vegetables including carrots, broccoli, and/or dark-green leafy; no potatoes, tomato-based sauce              | 48                 | 4                  | C           | 3             |
| 27345520 | 8000_Mixed | Chicken or turkey, rice, and vegetables excluding carrots, broccoli, and dark-green leafy; tomato-based sauce             | 48                 | 4                  | B           | 2             |
| 27211200 | 8000_Mixed | Beef stew with potatoes, gravy                                                                                            | 48                 | 4.5                | A           | 2             |
| 28340680 | 8000_Mixed | Chicken or turkey and corn hominy soup, home recipe, Mexican style                                                        | 48                 | 4                  | A           | 1             |
| 58117410 | 8000_Mixed | Codfish fritter, Puerto Rican style                                                                                       | 48                 | 4                  | B           | 2             |
| 27211000 | 8000_Mixed | Beef and potatoes, no sauce                                                                                               | 48                 | 4.5                | B           | 2             |
| 63415100 | 8000_Mixed | Soup, fruit                                                                                                               | 48                 | 4                  | B           | 2             |
| 27313210 | 8000_Mixed | Beef, noodles, and vegetables including carrots, broccoli, and/or dark-green leafy; tomato-based sauce                    | 48                 | 4                  | A           | 2             |
| 27460100 | 8000_Mixed | Lau lau                                                                                                                   | 48                 | 4                  | B           | 1             |
| 27213500 | 8000_Mixed | Beef and rice with soy-based sauce                                                                                        | 48                 | 3.5                | B           | 2             |
| 27330210 | 8000_Mixed | Lamb or mutton stew with potatoes and vegetables including carrots, broccoli, and/or dark-green leafy; tomato-based sauce | 48                 | 4.5                | A           | 1             |
| 14640040 | 8000_Mixed | Cheese sandwich, reduced fat American cheese, on wheat bread, with mayonnaise                                             | 48                 | 2                  | D           | 4             |
| 14640042 | 8000_Mixed | Cheese sandwich, reduced fat American cheese, on whole wheat bread, with mayonnaise                                       | 48                 | 2                  | D           | 4             |
| 27211150 | 8000_Mixed | Beef goulash with potatoes                                                                                                | 48                 | 4.5                | A           | 2             |
| 27462000 | 8000_Mixed | Stewed chitterlings, Puerto Rican style                                                                                   | 48                 | 4                  | B           | 2             |
| 27545110 | 8000_Mixed | Turkey or chicken burger, plain, on wheat bun                                                                             | 48                 | 4                  | A           | 4             |
| 75656010 | 8000_Mixed | Vegetable soup, Spanish style, stew type                                                                                  | 48                 | 4.5                | B           | 2             |
| 77513010 | 8000_Mixed | Spanish stew                                                                                                              | 48                 | 4.5                | B           | 2             |
| 27545210 | 8000_Mixed | Turkey or chicken burger, with condiments, on wheat bun                                                                   | 48                 | 4                  | B           | 4             |
| 27545220 | 8000_Mixed | Turkey or chicken burger, with condiments, on whole wheat bun                                                             | 48                 | 4                  | B           | 4             |
| 28145110 | 8000_Mixed | Turkey with vegetable, stuffing, diet frozen meal                                                                         | 48                 | 4.5                | A           | 4             |
| 58146722 | 8000_Mixed | Pasta, whole grain, with cream sauce and poultry, home recipe                                                             | 48                 | 3.5                | B           | 2             |
| 75418053 | 8000_Mixed | Squash, summer, from canned, creamed                                                                                      | 47                 | 4                  | B           | 1             |
| 27218210 | 8000_Mixed | Beef stew with potatoes, Puerto Rican style                                                                               | 47                 | 4                  | D           | 2             |
| 75404013 | 8000_Mixed | Beans, string, yellow, from canned, creamed or with cheese sauce                                                          | 47                 | 4                  | C           | 3             |
| 27330220 | 8000_Mixed | Lamb or mutton stew with potatoes and vegetables excluding carrots, broccoli, and dark-green leafy; tomato-based sauce    | 47                 | 4.5                | A           | 1             |
| 75651040 | 8000_Mixed | Vegetable noodle soup, canned, prepared with water, or ready-to-serve                                                     | 47                 | 4                  | B           | 4             |
| 75654010 | 8000_Mixed | Vegetarian vegetable soup, prepared with water                                                                            | 47                 | 4                  | B           | 4             |
| 72302000 | 8000_Mixed | Broccoli soup, prepared with milk, home recipe, canned or ready-to-serve                                                  | 47                 | 3                  | B           | 2             |
| 58160150 | 8000_Mixed | Red beans and rice                                                                                                        | 47                 | 4.5                | A           | 3             |
| 58165410 | 8000_Mixed | Rice, brown, with vegetables, cheese and/or cream based sauce, fat not added in cooking                                   | 47                 | 3.5                | B           | 2             |
| 27418110 | 8000_Mixed | Seasoned shredded soup meat                                                                                               | 47                 | 4                  | B           | 3             |
| 58146352 | 8000_Mixed | Pasta with tomato-based sauce, poultry, and added vegetables, home recipe                                                 | 47                 | 4                  | A           | 1             |
| 75417012 | 8000_Mixed | Peas, from frozen, creamed                                                                                                | 47                 | 4                  | A           | 1             |
| 75656040 | 8000_Mixed | Vegetable soup, with pasta, chunky style                                                                                  | 47                 | 4.5                | A           | 4             |
| 27150510 | 8000_Mixed | Scallops with cheese sauce                                                                                                | 47                 | 3.5                | C           | 2             |
| 58148170 | 8000_Mixed | Macaroni or pasta salad with chicken                                                                                      | 47                 | 3.5                | B           | 3             |
| 75417010 | 8000_Mixed | Peas, NS as to form, creamed                                                                                              | 47                 | 4                  | A           | 1             |
| 27343010 | 8000_Mixed | Chicken or turkey, noodles, and vegetables including carrots, broccoli, and/or dark-green leafy; no sauce                 | 47                 | 3.5                | A           | 2             |
| 58136130 | 8000_Mixed | Lo mein, with shrimp                                                                                                      | 47                 | 3.5                | A           | 1             |
| 58106570 | 8000_Mixed | Pizza with pepperoni, from school lunch, thin crust                                                                       | 47                 | 3.5                | C           | 4             |
| 75415011 | 8000_Mixed | Onions, from fresh, creamed                                                                                               | 47                 | 4                  | B           | 1             |
| 75651070 | 8000_Mixed | Vegetable rice soup, canned, prepared with water or ready-to-serve                                                        | 47                 | 4.5                | A           | 4             |
| 27350080 | 8000_Mixed | Tuna noodle casserole with vegetables, cream or white sauce                                                               | 47                 | 3.5                | A           | 2             |
| 27540230 | 8000_Mixed | Chicken patty sandwich with cheese, on wheat bun, with lettuce, tomato and spread                                         | 47                 | 2.5                | C           | 4             |
| 75402023 | 8000_Mixed | Beans, lima, immature, cooked, from canned, with mushroom sauce                                                           | 47                 | 4.5                | A           | 3             |
| 77141010 | 8000_Mixed | Potato chicken pie, Puerto Rican style                                                                                    | 47                 | 2                  | D           | 2             |
| 27360080 | 8000_Mixed | Chow mein or chop suey, NS as to type of meat, with noodles                                                               | 47                 | 4                  | A           | 1             |

| foodcode | level1nd   | Description                                                                                                                  | Food Compass Score | Health Star Rating | Nutri-Score | NOVA Category |
|----------|------------|------------------------------------------------------------------------------------------------------------------------------|--------------------|--------------------|-------------|---------------|
| 27250122 | 8000_Mixed | Shrimp and noodles with gravy                                                                                                | 47                 | 3.5                | A           | 2             |
| 58130950 | 8000_Mixed | Lasagna, meatless, spinach noodles                                                                                           | 47                 | 3                  | C           | 2             |
| 27311510 | 8000_Mixed | Shepherd's pie with beef                                                                                                     | 47                 | 4.5                | A           | 3             |
| 58146342 | 8000_Mixed | Pasta with tomato-based sauce and poultry, home recipe                                                                       | 47                 | 4                  | A           | 1             |
| 73111033 | 8000_Mixed | Peas and carrots, from canned, creamed                                                                                       | 47                 | 4                  | B           | 2             |
| 27564570 | 8000_Mixed | Frankfurter or hot dog sandwich, meatless, on bread, with meatless chili                                                     | 47                 | 4                  | A           | 4             |
| 27343910 | 8000_Mixed | Chicken or turkey chow mein or chop suey with noodles                                                                        | 47                 | 4                  | A           | 1             |
| 75418052 | 8000_Mixed | Squash, summer, from frozen, creamed                                                                                         | 47                 | 4                  | B           | 2             |
| 28311020 | 8000_Mixed | Menudo soup, home recipe                                                                                                     | 47                 | 4                  | B           | 1             |
| 75418050 | 8000_Mixed | Squash, summer, NS as to form, creamed                                                                                       | 47                 | 4                  | B           | 2             |
| 72302100 | 8000_Mixed | Broccoli cheese soup, prepared with milk, home recipe, canned, or ready-to-serve                                             | 47                 | 3                  | B           | 2             |
| 27212500 | 8000_Mixed | Beef and noodles with soy-based sauce                                                                                        | 47                 | 3.5                | B           | 2             |
| 27414200 | 8000_Mixed | Beef with vegetables excluding carrots, broccoli, and dark-green leafy; no potatoes, mushroom sauce                          | 47                 | 3.5                | B           | 2             |
| 27121010 | 8000_Mixed | Stewed pork, Puerto Rican style                                                                                              | 47                 | 3.5                | C           | 2             |
| 58149210 | 8000_Mixed | Somen salad with noodles, lettuce, egg, fish, and pork                                                                       | 47                 | 3.5                | A           | 2             |
| 58146150 | 8000_Mixed | Pasta with tomato-based sauce and cheese                                                                                     | 46                 | 4                  | B           | 3             |
| 27564430 | 8000_Mixed | Frankfurter or hot dog sandwich, meatless, plain, on bread                                                                   | 46                 | 4                  | A           | 4             |
| 32105210 | 8000_Mixed | Chicken egg foo yung                                                                                                         | 46                 | 3.5                | B           | 2             |
| 58100635 | 8000_Mixed | Enchilada with chicken, green-chile or enchilada sauce                                                                       | 46                 | 4                  | A           | 2             |
| 27313110 | 8000_Mixed | Beef chow mein or chop suey with noodles                                                                                     | 46                 | 4.5                | A           | 1             |
| 27320340 | 8000_Mixed | Pork, rice, and vegetables including carrots, broccoli, and/or dark-green leafy; tomato-based sauce                          | 46                 | 4                  | B           | 2             |
| 58162110 | 8000_Mixed | Stuffed pepper, with rice and meat                                                                                           | 46                 | 4                  | C           | 2             |
| 58146222 | 8000_Mixed | Pasta with tomato-based sauce, home recipe                                                                                   | 46                 | 4.5                | A           | 2             |
| 75418020 | 8000_Mixed | Squash, summer, casserole with tomato and cheese                                                                             | 46                 | 4                  | B           | 3             |
| 27331150 | 8000_Mixed | Veal fricassee, Puerto Rican style                                                                                           | 46                 | 4                  | C           | 3             |
| 58101940 | 8000_Mixed | Taco or tostada salad, meatless                                                                                              | 46                 | 4.5                | A           | 3             |
| 27146110 | 8000_Mixed | Sweet and sour chicken or turkey, without vegetables                                                                         | 46                 | 3.5                | B           | 1             |
| 58162130 | 8000_Mixed | Stuffed tomato, with rice and meat                                                                                           | 46                 | 4                  | B           | 2             |
| 27311420 | 8000_Mixed | Beef stew with potatoes and vegetables excluding carrots, broccoli, and dark-green leafy; gravy                              | 46                 | 4.5                | A           | 2             |
| 58146753 | 8000_Mixed | Pasta, whole grain, with cream sauce, seafood, and added vegetables, ready-to-heat                                           | 46                 | 3.5                | B           | 4             |
| 58134630 | 8000_Mixed | Tortellini, cheese-filled, meatless, with vegetables and vinaigrette dressing                                                | 46                 | 3.5                | B           | 4             |
| 27330010 | 8000_Mixed | Shepherd's pie with lamb                                                                                                     | 46                 | 4.5                | B           | 3             |
| 28340590 | 8000_Mixed | Chicken or turkey corn soup with noodles, home recipe                                                                        | 46                 | 4                  | B           | 2             |
| 58409000 | 8000_Mixed | Noodle soup, with fish ball, shrimp, and dark green leafy vegetable                                                          | 46                 | 3.5                | B           | 2             |
| 58146302 | 8000_Mixed | Pasta with tomato-based sauce, and added vegetables, home recipe                                                             | 46                 | 4.5                | A           | 1             |
| 75415010 | 8000_Mixed | Onions, NS as to form, creamed                                                                                               | 46                 | 4                  | B           | 1             |
| 24209001 | 8000_Mixed | Turkey with barbecue sauce, skin not eaten                                                                                   | 46                 | 3.5                | C           | 2             |
| 27347200 | 8000_Mixed | Chicken or turkey, stuffing, and vegetables including carrots, broccoli, and/or dark-green leafy; no sauce                   | 46                 | 3.5                | B           | 2             |
| 75440510 | 8000_Mixed | Vegetable combinations, excluding carrots, broccoli, and dark-green leafy; cooked, with cheese sauce                         | 46                 | 4                  | B           | 2             |
| 42302105 | 8000_Mixed | Peanut butter and jelly sandwich, with regular peanut butter, reduced sugar jelly, on white bread                            | 46                 | 2.5                | C           | 3             |
| 28340800 | 8000_Mixed | Chicken or turkey soup with vegetables and fruit, Asian Style                                                                | 46                 | 3                  | C           | 2             |
| 58148110 | 8000_Mixed | Macaroni or pasta salad, made with mayonnaise                                                                                | 46                 | 3.5                | B           | 3             |
| 27313220 | 8000_Mixed | Beef, noodles, and vegetables excluding carrots, broccoli, and dark-green leafy; tomato-based sauce                          | 46                 | 4                  | B           | 2             |
| 27250124 | 8000_Mixed | Shrimp and noodles with mushroom sauce                                                                                       | 46                 | 3.5                | A           | 2             |
| 75417023 | 8000_Mixed | Peas, cooked, from canned, with mushroom sauce                                                                               | 46                 | 4.5                | A           | 3             |
| 28141610 | 8000_Mixed | Chicken and vegetables in cream or white sauce, diet frozen meal                                                             | 46                 | 4                  | A           | 4             |
| 27460710 | 8000_Mixed | Livers, chicken, chopped, with eggs and onion                                                                                | 46                 | 1.5                | D           | 2             |
| 27350410 | 8000_Mixed | Tuna noodle casserole with vegetables and mushroom sauce                                                                     | 46                 | 3.5                | A           | 2             |
| 27416500 | 8000_Mixed | Beef and vegetables excluding carrots, broccoli, and dark-green leafy; no potatoes, gravy                                    | 46                 | 4                  | A           | 2             |
| 27250020 | 8000_Mixed | Clams, stuffed                                                                                                               | 46                 | 3.5                | C           | 4             |
| 58109140 | 8000_Mixed | Pizza, cheese and vegetables, gluten-free thin crust                                                                         | 46                 | 3                  | B           | 4             |
| 73502000 | 8000_Mixed | Squash, winter type, soup, home recipe, canned, or ready-to-serve                                                            | 46                 | 4                  | C           | 2             |
| 58100620 | 8000_Mixed | Enchilada with chicken and beans, red-chile or enchilada sauce                                                               | 46                 | 4.5                | A           | 2             |
| 27243500 | 8000_Mixed | Chicken or turkey and rice with tomato-based sauce                                                                           | 46                 | 3.5                | B           | 2             |
| 27141050 | 8000_Mixed | Stewed chicken with tomato-based sauce, Mexican style                                                                        | 46                 | 3.5                | B           | 3             |
| 27146100 | 8000_Mixed | Sweet and sour chicken or turkey                                                                                             | 46                 | 3.5                | B           | 1             |
| 14640028 | 8000_Mixed | Cheese sandwich, American cheese, on wheat bread, with mayonnaise                                                            | 46                 | 1.5                | D           | 4             |
| 14640030 | 8000_Mixed | Cheese sandwich, American cheese, on whole wheat bread, with mayonnaise                                                      | 46                 | 1.5                | D           | 4             |
| 28153010 | 8000_Mixed | Shrimp and clams in tomato-based sauce, with noodles, frozen meal                                                            | 45                 | 4                  | B           | 4             |
| 28310320 | 8000_Mixed | Beef noodle soup, Puerto Rican style                                                                                         | 45                 | 4.5                | B           | 1             |
| 27446255 | 8000_Mixed | Chicken or turkey salad, made with light Italian dressing                                                                    | 45                 | 3.5                | B           | 2             |
| 27315210 | 8000_Mixed | Beef, rice, and vegetables including carrots, broccoli, and/or dark-green leafy; tomato-based sauce                          | 45                 | 4                  | B           | 2             |
| 27445150 | 8000_Mixed | General Tso chicken                                                                                                          | 45                 | 3                  | C           | 1             |
| 75460900 | 8000_Mixed | Chow mein or chop suey, meatless, with noodles                                                                               | 45                 | 4                  | C           | 1             |
| 75652050 | 8000_Mixed | Vegetable beef soup with rice, home recipe                                                                                   | 45                 | 4.5                | B           | 2             |
| 58148120 | 8000_Mixed | Macaroni or pasta salad with egg                                                                                             | 45                 | 3.5                | B           | 3             |
| 75414013 | 8000_Mixed | Mushrooms, from canned, creamed                                                                                              | 45                 | 3.5                | C           | 1             |
| 75460810 | 8000_Mixed | Vegetable combinations, excluding carrots, broccoli, and dark-green leafy; cooked, with butter sauce and pasta               | 45                 | 4.5                | A           | 3             |
| 58137210 | 8000_Mixed | Pad Thai, NFS                                                                                                                | 45                 | 4                  | B           | 2             |
| 58137230 | 8000_Mixed | Pad Thai with chicken                                                                                                        | 45                 | 4                  | B           | 2             |
| 14640046 | 8000_Mixed | Cheese sandwich, reduced fat Cheddar cheese, on wheat bread, with mayonnaise                                                 | 45                 | 2                  | D           | 4             |
| 14640048 | 8000_Mixed | Cheese sandwich, reduced fat Cheddar cheese, on whole wheat bread, with mayonnaise                                           | 45                 | 2                  | D           | 4             |
| 58106578 | 8000_Mixed | Pizza, with pepperoni, from school lunch, medium crust                                                                       | 45                 | 3.5                | C           | 4             |
| 41602090 | 8000_Mixed | Split pea and ham soup, canned, reduced sodium, prepared with water or ready-to-serve                                        | 45                 | 4.5                | A           | 4             |
| 27261000 | 8000_Mixed | Breaded brains, Puerto Rican style                                                                                           | 45                 | 3                  | C           | 3             |
| 58151440 | 8000_Mixed | Sushi, topped with tuna                                                                                                      | 45                 | 4                  | A           | 2             |
| 27416100 | 8000_Mixed | Beef and vegetables, Hawaiian style                                                                                          | 45                 | 4                  | C           | 2             |
| 58155310 | 8000_Mixed | Paella with meat, Valenciana style                                                                                           | 45                 | 2                  | D           | 2             |
| 58156610 | 8000_Mixed | Pigeon pea asopao, Asopao de gandules                                                                                        | 45                 | 4                  | B           | 2             |
| 27430580 | 8000_Mixed | Veal with vegetables including carrots, broccoli, and/or dark-green leafy; no potatoes, cream or white sauce                 | 45                 | 3.5                | A           | 2             |
| 27250260 | 8000_Mixed | Lobster with bread stuffing, baked                                                                                           | 45                 | 2                  | D           | 2             |
| 72202010 | 8000_Mixed | Broccoli casserole with noodles                                                                                              | 45                 | 4                  | A           | 2             |
| 28310420 | 8000_Mixed | Beef and rice soup, Puerto Rican style                                                                                       | 45                 | 4.5                | B           | 1             |
| 27416400 | 8000_Mixed | Stir fried beef and vegetables in soy sauce                                                                                  | 45                 | 4.5                | A           | 2             |
| 75418101 | 8000_Mixed | Turnips, from fresh, creamed                                                                                                 | 45                 | 4                  | B           | 1             |
| 58109100 | 8000_Mixed | Pizza, cheese, gluten-free thin crust                                                                                        | 45                 | 3                  | C           | 4             |
| 27350200 | 8000_Mixed | Oyster pie                                                                                                                   | 45                 | 2.5                | C           | 3             |
| 58146702 | 8000_Mixed | Pasta, whole grain, with cream sauce and meat, home recipe                                                                   | 45                 | 3.5                | B           | 2             |
| 51136000 | 8000_Mixed | Bruschetta                                                                                                                   | 44                 | 4                  | B           | 2             |
| 58160550 | 8000_Mixed | Rice, white, with dark green vegetables, NS as to fat added in cooking                                                       | 44                 | 3.5                | B           | 2             |
| 58160570 | 8000_Mixed | Rice, white, with dark green vegetables, fat added in cooking                                                                | 44                 | 3.5                | B           | 2             |
| 42302155 | 8000_Mixed | Peanut butter and jelly sandwich, with reduced fat peanut butter, reduced sugar jelly, on white bread                        | 44                 | 3.5                | C           | 3             |
| 27343470 | 8000_Mixed | Chicken or turkey, noodles, and vegetables including carrots, broccoli, and/or dark-green leafy; cream sauce, white sauce, c | 44                 | 3.5                | B           | 2             |
| 58164810 | 8000_Mixed | Rice, brown, with cheese and/or cream based sauce, fat not added in cooking                                                  | 44                 | 3.5                | B           | 2             |
| 58148117 | 8000_Mixed | Macaroni or pasta salad, made with light creamy dressing                                                                     | 44                 | 4                  | A           | 2             |
| 27144000 | 8000_Mixed | Chicken or turkey with mushroom sauce                                                                                        | 44                 | 4                  | B           | 1             |
| 58134210 | 8000_Mixed | Stuffed shells, with chicken, with tomato sauce                                                                              | 44                 | 4.5                | A           | 1             |
| 27320210 | 8000_Mixed | Sausage, potatoes, and vegetables including carrots, broccoli, and/or dark-green leafy; gravy                                | 44                 | 4                  | B           | 3             |
| 27343410 | 8000_Mixed | Chicken or turkey, noodles, and vegetables including carrots, broccoli, and/or dark-green leafy; gravy                       | 44                 | 3.5                | B           | 2             |
| 58146373 | 8000_Mixed | Pasta with tomato-based sauce, seafood, and added vegetables, ready-to-heat                                                  | 44                 | 4                  | A           | 4             |
| 27360120 | 8000_Mixed | Chow mein or chop suey, various types of meat, with noodles                                                                  | 44                 | 4                  | B           | 1             |
| 58110130 | 8000_Mixed | Egg roll, with beef and/or pork                                                                                              | 44                 | 3                  | C           | 3             |

| foodcode | level1nd   | Description                                                                                                                  | Food Compass Score | Health Star Rating | Nutri-Score | NOVA Category |
|----------|------------|------------------------------------------------------------------------------------------------------------------------------|--------------------|--------------------|-------------|---------------|
| 27343020 | 8000_Mixed | Chicken or turkey, noodles, and vegetables excluding carrots, broccoli, and dark-green leafy; no sauce                       | 44                 | 3.5                | A           | 2             |
| 27146300 | 8000_Mixed | Chicken or turkey parmigiana                                                                                                 | 44                 | 3.5                | B           | 2             |
| 28340220 | 8000_Mixed | Chicken soup with noodles and potatoes, Puerto Rican style                                                                   | 44                 | 4.5                | A           | 1             |
| 75651010 | 8000_Mixed | Minestrone soup, canned, prepared with water, or ready-to-serve                                                              | 44                 | 4.5                | B           | 4             |
| 28350220 | 8000_Mixed | Clam chowder, Manhattan                                                                                                      | 44                 | 4                  | B           | 4             |
| 27335100 | 8000_Mixed | Rabbit stew with potatoes and vegetables                                                                                     | 44                 | 4.5                | A           | 1             |
| 75142600 | 8000_Mixed | Cucumber salad made with cucumber and vinegar                                                                                | 44                 | 4                  | B           | 2             |
| 27411120 | 8000_Mixed | Swiss steak                                                                                                                  | 44                 | 4                  | A           | 2             |
| 75414010 | 8000_Mixed | Mushrooms, NS as to form, creamed                                                                                            | 44                 | 3.5                | C           | 1             |
| 58146363 | 8000_Mixed | Pasta with tomato-based sauce and seafood, ready-to-heat                                                                     | 44                 | 4                  | A           | 4             |
| 27311220 | 8000_Mixed | Corned beef, potatoes, and vegetables excluding carrots, broccoli, and dark-green leafy; no sauce                            | 44                 | 4.5                | B           | 2             |
| 27320350 | 8000_Mixed | Pork, rice, and vegetables excluding carrots, broccoli, and dark-green leafy; tomato-based sauce                             | 44                 | 4                  | B           | 2             |
| 58402100 | 8000_Mixed | Beef noodle soup, home recipe                                                                                                | 44                 | 3.5                | A           | 2             |
| 58110170 | 8000_Mixed | Egg roll, with chicken or turkey                                                                                             | 44                 | 3.5                | B           | 3             |
| 41601020 | 8000_Mixed | Bean with bacon or ham soup, canned or ready-to-serve                                                                        | 44                 | 4.5                | A           | 4             |
| 58101935 | 8000_Mixed | Taco or tostada salad with chicken                                                                                           | 44                 | 4                  | A           | 2             |
| 27150020 | 8000_Mixed | Crab, deviled                                                                                                                | 44                 | 3                  | D           | 4             |
| 75417013 | 8000_Mixed | Peas, from canned, creamed                                                                                                   | 44                 | 4                  | A           | 2             |
| 58106236 | 8000_Mixed | Pizza, cheese, from school lunch, thick crust                                                                                | 44                 | 3.5                | C           | 4             |
| 58148114 | 8000_Mixed | Macaroni or pasta salad, made with Italian dressing                                                                          | 44                 | 4                  | A           | 3             |
| 27330110 | 8000_Mixed | Lamb or mutton stew with potatoes and vegetables excluding carrots, broccoli, and dark-green leafy; gravy                    | 44                 | 5                  | A           | 1             |
| 41601010 | 8000_Mixed | Bean soup, NFS                                                                                                               | 44                 | 4.5                | A           | 4             |
| 75418103 | 8000_Mixed | Turnips, from canned, creamed                                                                                                | 44                 | 4                  | B           | 3             |
| 58110110 | 8000_Mixed | Egg roll, meatless                                                                                                           | 44                 | 3.5                | C           | 3             |
| 58110120 | 8000_Mixed | Egg roll, with shrimp                                                                                                        | 44                 | 3.5                | C           | 3             |
| 75418100 | 8000_Mixed | Turnips, NS as to form, creamed                                                                                              | 44                 | 4                  | B           | 2             |
| 75418102 | 8000_Mixed | Turnips, from frozen, creamed                                                                                                | 44                 | 4                  | B           | 2             |
| 27446410 | 8000_Mixed | Chicken or turkey and vegetables excluding carrots, broccoli, and dark-green leafy; no potatoes, cheese sauce                | 43                 | 3.5                | C           | 1             |
| 27250900 | 8000_Mixed | Fish and noodles with mushroom sauce                                                                                         | 43                 | 3.5                | B           | 2             |
| 28340210 | 8000_Mixed | Chicken rice soup, Puerto Rican style                                                                                        | 43                 | 4.5                | A           | 1             |
| 58146731 | 8000_Mixed | Pasta, whole grain, with cream sauce, poultry, and added vegetables, restaurant                                              | 43                 | 3                  | C           | 4             |
| 28320140 | 8000_Mixed | Ham, noodle, and vegetable soup, Puerto Rican style                                                                          | 43                 | 4                  | C           | 2             |
| 28355130 | 8000_Mixed | Clam chowder, New England, prepared with water                                                                               | 43                 | 4                  | B           | 4             |
| 14640070 | 8000_Mixed | Cheese sandwich, reduced fat Cheddar cheese, on wheat bread, with butter                                                     | 43                 | 1.5                | D           | 3             |
| 14640072 | 8000_Mixed | Cheese sandwich, reduced fat Cheddar cheese, on whole wheat bread, with butter                                               | 43                 | 1.5                | D           | 3             |
| 27430590 | 8000_Mixed | Veal with vegetables excluding carrots, broccoli, and dark-green leafy; and potatoes, cream or white sauce                   | 43                 | 3.5                | A           | 2             |
| 58100805 | 8000_Mixed | Enchilada, just cheese, meatless, no beans, green-chile or enchilada sauce                                                   | 43                 | 4                  | C           | 3             |
| 27118180 | 8000_Mixed | Beef stew, meat with gravy, no potatoes, Puerto Rican style                                                                  | 43                 | 3.5                | C           | 2             |
| 27341045 | 8000_Mixed | Chicken or turkey, potatoes, and vegetables including carrots, broccoli, and/or dark-green leafy; cheese sauce               | 43                 | 4                  | B           | 2             |
| 75416010 | 8000_Mixed | Parsnips, creamed                                                                                                            | 43                 | 4                  | B           | 2             |
| 27150050 | 8000_Mixed | Fish timbale or mousse                                                                                                       | 43                 | 3                  | C           | 2             |
| 58146682 | 8000_Mixed | Pasta, whole grain, with cream sauce, home recipe                                                                            | 43                 | 3                  | C           | 3             |
| 14640190 | 8000_Mixed | Grilled cheese sandwich, reduced fat Cheddar cheese, on wheat bread                                                          | 43                 | 1.5                | D           | 3             |
| 14640195 | 8000_Mixed | Grilled cheese sandwich, reduced fat Cheddar cheese, on whole wheat bread                                                    | 43                 | 1.5                | D           | 3             |
| 27250710 | 8000_Mixed | Tuna and rice with mushroom sauce                                                                                            | 43                 | 3.5                | B           | 2             |
| 58421080 | 8000_Mixed | Sopa de tortilla, Mexican style tortilla soup, home recipe                                                                   | 43                 | 3.5                | C           | 2             |
| 27345010 | 8000_Mixed | Chicken or turkey, rice, and vegetables including carrots, broccoli, and/or dark-green leafy; no sauce                       | 43                 | 3.5                | A           | 2             |
| 58106634 | 8000_Mixed | Pizza, with meat other than pepperoni, from school lunch, medium crust                                                       | 43                 | 3.5                | C           | 4             |
| 42302010 | 8000_Mixed | Peanut butter and jelly sandwich, NFS                                                                                        | 43                 | 2.5                | D           | 3             |
| 27564390 | 8000_Mixed | Frankfurter or hot dog sandwich, fat free, plain, on whole wheat bread                                                       | 43                 | 3.5                | B           | 4             |
| 42302015 | 8000_Mixed | Peanut butter and jelly sandwich, with regular peanut butter, regular jelly, on white bread                                  | 43                 | 2.5                | D           | 3             |
| 42303100 | 8000_Mixed | Peanut butter and jelly sandwich, frozen commercial product without crusts                                                   | 43                 | 2.5                | D           | 3             |
| 58130014 | 8000_Mixed | Lasagna with meat, from restaurant                                                                                           | 43                 | 3                  | C           | 1             |
| 27564362 | 8000_Mixed | Frankfurter or hot dog sandwich, fat free, plain, on whole wheat bun                                                         | 43                 | 3.5                | B           | 4             |
| 58104090 | 8000_Mixed | Nachos with cheese and sour cream                                                                                            | 43                 | 4                  | A           | 3             |
| 58100520 | 8000_Mixed | Enchilada with meat and beans, red-chile or enchilada sauce                                                                  | 43                 | 4.5                | A           | 2             |
| 75402010 | 8000_Mixed | Beans, lima, immature, NS as to form, creamed or with cheese sauce                                                           | 43                 | 4.5                | A           | 1             |
| 73501010 | 8000_Mixed | Carrot with rice soup, cream of, prepared with milk, home recipe, canned or ready-to-serve                                   | 43                 | 4                  | B           | 1             |
| 75603010 | 8000_Mixed | Celery soup, cream of, prepared with milk, home recipe, canned or ready-to-serve                                             | 43                 | 3                  | C           | 2             |
| 58148550 | 8000_Mixed | Macaroni or pasta salad with meat                                                                                            | 43                 | 3.5                | B           | 3             |
| 58404030 | 8000_Mixed | Chicken or turkey rice soup, home recipe                                                                                     | 43                 | 3.5                | B           | 2             |
| 27250610 | 8000_Mixed | Tuna noodle casserole with cream or white sauce                                                                              | 43                 | 3.5                | B           | 2             |
| 58130150 | 8000_Mixed | Lasagna, with chicken or turkey, and spinach                                                                                 | 43                 | 3.5                | C           | 2             |
| 27145000 | 8000_Mixed | Chicken or turkey with teriyaki                                                                                              | 43                 | 3.5                | D           | 1             |
| 27330030 | 8000_Mixed | Lamb or mutton stew with potatoes and vegetables including carrots, broccoli, and/or dark-green leafy; gravy                 | 42                 | 4.5                | A           | 1             |
| 27550730 | 8000_Mixed | Tuna melt sandwich                                                                                                           | 42                 | 3                  | C           | 4             |
| 27315220 | 8000_Mixed | Beef, rice, and vegetables excluding carrots, broccoli, and/or dark-green leafy; tomato-based sauce                          | 42                 | 4                  | B           | 2             |
| 42302055 | 8000_Mixed | Peanut butter and jelly sandwich, with reduced fat peanut butter, regular jelly, on white bread                              | 42                 | 2.5                | C           | 3             |
| 58117310 | 8000_Mixed | Kibby, Puerto Rican style                                                                                                    | 42                 | 3.5                | B           | 1             |
| 58147520 | 8000_Mixed | Yat Ga Mein with meat, fish, or poultry                                                                                      | 42                 | 4                  | B           | 2             |
| 58106234 | 8000_Mixed | Pizza, cheese, from school lunch, medium crust                                                                               | 42                 | 3.5                | C           | 4             |
| 28340750 | 8000_Mixed | Hot and sour soup                                                                                                            | 42                 | 3                  | C           | 1             |
| 58106635 | 8000_Mixed | Pizza, with meat other than pepperoni, from school lunch, thin crust                                                         | 42                 | 3.5                | C           | 4             |
| 27146360 | 8000_Mixed | Sesame chicken                                                                                                               | 42                 | 2                  | D           | 1             |
| 58101720 | 8000_Mixed | Taco or tostada with beans                                                                                                   | 42                 | 4                  | B           | 3             |
| 58130910 | 8000_Mixed | Lasagna with meat, spinach noodles                                                                                           | 42                 | 3                  | C           | 2             |
| 27510587 | 8000_Mixed | Hamburger, 1 small patty, with condiments, on whole wheat bun                                                                | 42                 | 3.5                | B           | 3             |
| 27320310 | 8000_Mixed | Pork chow mein or chop suey with noodles                                                                                     | 42                 | 4                  | B           | 1             |
| 27446260 | 8000_Mixed | Chicken or turkey salad, made with any type of fat free dressing                                                             | 42                 | 3.5                | B           | 2             |
| 27343480 | 8000_Mixed | Chicken or turkey, noodles, and vegetables excluding carrots, broccoli, and/or dark-green leafy; cream sauce, white sauce, c | 42                 | 3.5                | B           | 2             |
| 28143150 | 8000_Mixed | Chicken and vegetable entree with noodles, diet frozen meal                                                                  | 42                 | 4.5                | A           | 4             |
| 27347210 | 8000_Mixed | Chicken or turkey, stuffing, and vegetables excluding carrots, broccoli, and dark green leafy; no sauce                      | 42                 | 3.5                | B           | 2             |
| 27142000 | 8000_Mixed | Chicken with gravy                                                                                                           | 42                 | 4                  | B           | 1             |
| 27320027 | 8000_Mixed | Ham or pork, noodles, and vegetables including carrots, broccoli, and/or dark-green leafy; no sauce                          | 42                 | 3.5                | A           | 2             |
| 27143000 | 8000_Mixed | Chicken or turkey with cream sauce                                                                                           | 42                 | 4                  | B           | 1             |
| 32105220 | 8000_Mixed | Pork egg foo yung                                                                                                            | 42                 | 3.5                | B           | 2             |
| 27211300 | 8000_Mixed | Beef, roast, hash                                                                                                            | 42                 | 4.5                | B           | 3             |
| 27250126 | 8000_Mixed | Shrimp and noodles with cream or white sauce                                                                                 | 42                 | 3.5                | A           | 2             |
| 58130320 | 8000_Mixed | Lasagna, meatless, with vegetables                                                                                           | 42                 | 3.5                | C           | 2             |
| 24209000 | 8000_Mixed | Turkey with barbecue sauce, skin eaten                                                                                       | 42                 | 3.5                | D           | 2             |
| 27315250 | 8000_Mixed | Stuffed cabbage rolls with beef and rice                                                                                     | 42                 | 4.5                | A           | 1             |
| 58100535 | 8000_Mixed | Enchilada with meat, green-chile or enchilada sauce                                                                          | 42                 | 4                  | A           | 2             |
| 58104150 | 8000_Mixed | Nachos with chicken and cheese                                                                                               | 42                 | 4                  | B           | 2             |
| 58106580 | 8000_Mixed | Pizza with pepperoni, from school lunch, thick crust                                                                         | 42                 | 3.5                | C           | 4             |
| 32105240 | 8000_Mixed | Beef egg foo yung                                                                                                            | 42                 | 3.5                | B           | 2             |
| 58151200 | 8000_Mixed | Sushi roll, salmon                                                                                                           | 42                 | 3.5                | B           | 2             |
| 58137250 | 8000_Mixed | Pad Thai with meat                                                                                                           | 42                 | 4                  | A           | 2             |
| 27540120 | 8000_Mixed | Chicken salad or chicken spread sandwich                                                                                     | 42                 | 3.5                | B           | 3             |
| 58106235 | 8000_Mixed | Pizza, cheese, from school lunch, thin crust                                                                                 | 41                 | 3.5                | C           | 4             |
| 58148115 | 8000_Mixed | Macaroni or pasta salad, made with light Italian dressing                                                                    | 41                 | 4                  | A           | 2             |
| 27347220 | 8000_Mixed | Chicken or turkey, stuffing, and vegetables including carrots, broccoli, and/or dark-green leafy; gravy                      | 41                 | 3.5                | B           | 2             |
| 75652030 | 8000_Mixed | Vegetable beef soup, canned, prepared with milk                                                                              | 41                 | 3.5                | B           | 2             |

| foodcode | level1nd   | Description                                                                                                                  | Food Compass Score | Health Star Rating | Nutri-Score | NOVA Category |
|----------|------------|------------------------------------------------------------------------------------------------------------------------------|--------------------|--------------------|-------------|---------------|
| 27332100 | 8000_Mixed | Veal stew with potatoes and vegetables including carrots, broccoli, and/or dark-green leafy; tomato-based sauce              | 41                 | 4.5                | A           | 1             |
| 75340160 | 8000_Mixed | Vegetable and pasta combinations with cream or cheese sauce, broccoli, pasta, carrots, corn, zucchini, peppers, cauliflower  | 41                 | 4                  | B           | 4             |
| 58101955 | 8000_Mixed | Taco or tostada salad, meatless with sour cream                                                                              | 41                 | 4.5                | B           | 3             |
| 58160610 | 8000_Mixed | Rice, white, with dark green vegetables and tomatoes and/or tomato-based sauce, NS as to fat added in cooking                | 41                 | 4                  | B           | 2             |
| 58160630 | 8000_Mixed | Rice, white, with dark green vegetables and tomatoes and/or tomato-based sauce, fat added in cooking                         | 41                 | 4                  | B           | 2             |
| 75402012 | 8000_Mixed | Beans, lima, immature, from frozen, creamed or with cheese sauce                                                             | 41                 | 4.5                | A           | 2             |
| 58156710 | 8000_Mixed | Rice with stewed beans, Puerto Rican style                                                                                   | 41                 | 3.5                | B           | 2             |
| 28311010 | 8000_Mixed | Pepperpot soup                                                                                                               | 41                 | 4                  | B           | 2             |
| 58151190 | 8000_Mixed | Sushi roll, eel                                                                                                              | 41                 | 3.5                | B           | 2             |
| 27243100 | 8000_Mixed | Biryani with chicken                                                                                                         | 41                 | 4.5                | A           | 1             |
| 27111100 | 8000_Mixed | Beef goulash                                                                                                                 | 41                 | 4                  | A           | 3             |
| 58104260 | 8000_Mixed | Gordita, sope, or chalupa with beans                                                                                         | 41                 | 4                  | A           | 3             |
| 27422010 | 8000_Mixed | Pork chop stewed with vegetables, Puerto Rican style                                                                         | 41                 | 4.5                | A           | 2             |
| 27510642 | 8000_Mixed | Hamburger, 1 medium patty, with condiments, on wheat bun                                                                     | 41                 | 3.5                | B           | 3             |
| 27510643 | 8000_Mixed | Hamburger, 1 medium patty, with condiments, on whole wheat bun                                                               | 41                 | 3.5                | B           | 3             |
| 27332110 | 8000_Mixed | Veal stew with potatoes and vegetables excluding carrots, broccoli, and/or dark-green leafy; tomato-based sauce              | 41                 | 4.5                | A           | 1             |
| 27345410 | 8000_Mixed | Chicken or turkey, rice, and vegetables including carrots, broccoli, and/or dark-green leafy; cream sauce, white sauce, or m | 41                 | 3.5                | B           | 2             |
| 27416300 | 8000_Mixed | Beef taco filling: beef, cheese, tomato, taco sauce                                                                          | 41                 | 3.5                | D           | 2             |
| 27118130 | 8000_Mixed | Stewed dried beef, Puerto Rican style                                                                                        | 41                 | 0.5                | D           | 3             |
| 27212150 | 8000_Mixed | Beef goulash with noodles                                                                                                    | 41                 | 4                  | A           | 2             |
| 58100320 | 8000_Mixed | Burrito with beans, meatless                                                                                                 | 41                 | 4                  | C           | 3             |
| 27564560 | 8000_Mixed | Frankfurter or hot dog sandwich, meatless, on bun, with meatless chili                                                       | 41                 | 4                  | A           | 4             |
| 27220520 | 8000_Mixed | Ham or pork and potatoes with cheese sauce                                                                                   | 41                 | 4                  | B           | 2             |
| 27343420 | 8000_Mixed | Chicken or turkey, noodles, and vegetables excluding carrots, broccoli, and dark-green leafy; gravy                          | 41                 | 3.5                | B           | 2             |
| 27420460 | 8000_Mixed | Sausage and vegetables, excluding carrots, broccoli, and dark-green leafy; no potatoes, tomato-based sauce                   | 41                 | 4                  | C           | 3             |
| 58146733 | 8000_Mixed | Pasta, whole grain, with cream sauce, poultry, and added vegetables, ready-to-heat                                           | 41                 | 3.5                | B           | 4             |
| 58146691 | 8000_Mixed | Pasta, whole grain, with cream sauce, and added vegetables, restaurant                                                       | 41                 | 2.5                | C           | 4             |
| 58128120 | 8000_Mixed | Cornmeal dressing with chicken or turkey and vegetables                                                                      | 41                 | 3                  | C           | 2             |
| 58125120 | 8000_Mixed | Spinach quiche, meatless                                                                                                     | 41                 | 1.5                | D           | 2             |
| 58106820 | 8000_Mixed | Pizza with beans and vegetables, thin crust                                                                                  | 41                 | 4                  | C           | 3             |
| 58101610 | 8000_Mixed | Soft taco with beans                                                                                                         | 41                 | 4.5                | B           | 3             |
| 58130140 | 8000_Mixed | Lasagna with chicken or turkey                                                                                               | 41                 | 3.5                | C           | 2             |
| 27220080 | 8000_Mixed | Ham croquette                                                                                                                | 41                 | 1.5                | D           | 3             |
| 58106636 | 8000_Mixed | Pizza, with meat other than pepperoni, from school lunch, thick crust                                                        | 41                 | 3.5                | C           | 4             |
| 58160640 | 8000_Mixed | Rice, white, with carrots and dark green vegetables, NS as to fat added in cooking                                           | 41                 | 4                  | B           | 2             |
| 58160660 | 8000_Mixed | Rice, white, with carrots and dark green vegetables, fat added in cooking                                                    | 41                 | 4                  | B           | 2             |
| 58146743 | 8000_Mixed | Pasta, whole grain, with cream sauce and seafood, ready-to-heat                                                              | 41                 | 3                  | C           | 4             |
| 58120110 | 8000_Mixed | Crepe, filled with meat, poultry, or seafood, with sauce                                                                     | 41                 | 3.5                | C           | 2             |
| 27250630 | 8000_Mixed | Tuna noodle casserole with mushroom sauce                                                                                    | 41                 | 3.5                | B           | 2             |
| 27242000 | 8000_Mixed | Chicken or turkey and noodles, no sauce                                                                                      | 41                 | 3.5                | B           | 2             |
| 75649040 | 8000_Mixed | Vegetable soup, reduced sodium, canned, ready to serve                                                                       | 41                 | 4.5                | B           | 4             |
| 58163130 | 8000_Mixed | Dirty rice                                                                                                                   | 41                 | 3.5                | B           | 2             |
| 27345210 | 8000_Mixed | Chicken or turkey, rice, and vegetables including carrots, broccoli, and/or dark-green leafy; gravy                          | 41                 | 3.5                | B           | 2             |
| 27211110 | 8000_Mixed | Beef stew with potatoes, tomato-based sauce, Mexican style                                                                   | 41                 | 4                  | A           | 2             |
| 58140310 | 8000_Mixed | Macaroni with tuna, Puerto Rican style                                                                                       | 41                 | 3.5                | B           | 2             |
| 58115210 | 8000_Mixed | Taco with crab meat, Puerto Rican style                                                                                      | 40                 | 3                  | D           | 2             |
| 77230210 | 8000_Mixed | Cassava Pasteles, Puerto Rican style                                                                                         | 40                 | 3                  | D           | 2             |
| 58109150 | 8000_Mixed | Pizza, cheese and vegetables, gluten-free thick crust                                                                        | 40                 | 3                  | B           | 4             |
| 58127110 | 8000_Mixed | Vegetables in pastry                                                                                                         | 40                 | 3.5                | B           | 4             |
| 58403060 | 8000_Mixed | Chicken or turkey noodle soup, reduced sodium, canned or ready-to-serve                                                      | 40                 | 4.5                | A           | 4             |
| 27430400 | 8000_Mixed | Lamb or mutton stew with vegetables including carrots, broccoli, and/or dark-green leafy; no potatoes, gravy                 | 40                 | 4.5                | A           | 2             |
| 27564330 | 8000_Mixed | Frankfurter or hot dog sandwich, reduced fat or light, plain, on whole wheat bread                                           | 40                 | 3.5                | B           | 4             |
| 27320130 | 8000_Mixed | Sausage, potatoes, and vegetables excluding carrots, broccoli, and dark-green leafy; gravy                                   | 40                 | 4                  | B           | 3             |
| 58146711 | 8000_Mixed | Pasta, whole grain, with cream sauce, meat, and added vegetables, restaurant                                                 | 40                 | 3                  | C           | 4             |
| 28315150 | 8000_Mixed | Meat and corn hominy soup, home recipe, Mexican style                                                                        | 40                 | 4                  | B           | 1             |
| 14640058 | 8000_Mixed | Cheese sandwich, Cheddar cheese, on wheat bread, with butter                                                                 | 40                 | 1.5                | D           | 3             |
| 14640060 | 8000_Mixed | Cheese sandwich, Cheddar cheese, on whole wheat bread, with butter                                                           | 40                 | 1.5                | D           | 3             |
| 27221110 | 8000_Mixed | Stuffed pork roast, Puerto Rican style                                                                                       | 40                 | 4                  | B           | 2             |
| 58111120 | 8000_Mixed | Wonton, fried, meatless                                                                                                      | 40                 | 3.5                | B           | 3             |
| 28340120 | 8000_Mixed | Chicken or turkey broth, without tomato, home recipe                                                                         | 40                 | 3.5                | B           | 1             |
| 14640130 | 8000_Mixed | Grilled cheese sandwich, Cheddar cheese, on wheat bread                                                                      | 40                 | 1.5                | D           | 3             |
| 14640135 | 8000_Mixed | Grilled cheese sandwich, Cheddar cheese, on whole wheat bread                                                                | 40                 | 1.5                | D           | 3             |
| 27360000 | 8000_Mixed | Stew, NFS                                                                                                                    | 40                 | 4.5                | B           | 2             |
| 27564400 | 8000_Mixed | Frankfurter or hot dog sandwich, fat free, plain, on whole grain white bread                                                 | 40                 | 3.5                | B           | 4             |
| 27510576 | 8000_Mixed | Hamburger, 1 small patty, plain, on wheat bun                                                                                | 40                 | 3.5                | C           | 3             |
| 27510577 | 8000_Mixed | Hamburger, 1 small patty, plain, on whole wheat bun                                                                          | 40                 | 3.5                | C           | 3             |
| 58101950 | 8000_Mixed | Taco or tostada salad with chicken and sour cream                                                                            | 40                 | 4                  | B           | 2             |
| 75411031 | 8000_Mixed | Corn, cooked, from fresh, with cream sauce, made with milk                                                                   | 40                 | 4                  | B           | 1             |
| 28331110 | 8000_Mixed | Lamb, pasta, and vegetable soup, Puerto Rican style                                                                          | 40                 | 4                  | C           | 1             |
| 58160430 | 8000_Mixed | Rice, white, with peas, NS as to fat added in cooking                                                                        | 40                 | 4                  | A           | 2             |
| 58160450 | 8000_Mixed | Rice, white, with peas, fat added in cooking                                                                                 | 40                 | 4                  | A           | 2             |
| 75402013 | 8000_Mixed | Beans, lima, immature, from canned, creamed or with cheese sauce                                                             | 40                 | 4.5                | A           | 3             |
| 27421010 | 8000_Mixed | Stuffed christophine, Puerto Rican style                                                                                     | 40                 | 4.5                | B           | 2             |
| 14640034 | 8000_Mixed | Cheese sandwich, Cheddar cheese, on wheat bread, with mayonnaise                                                             | 40                 | 1.5                | D           | 4             |
| 14640036 | 8000_Mixed | Cheese sandwich, Cheddar cheese, on whole wheat bread, with mayonnaise                                                       | 40                 | 1.5                | D           | 4             |
| 27341050 | 8000_Mixed | Chicken or turkey, potatoes, and vegetables excluding carrots, broccoli, and dark-green leafy; cheese sauce                  | 40                 | 4                  | B           | 2             |
| 27363100 | 8000_Mixed | Jambalaya with meat and rice                                                                                                 | 40                 | 3.5                | C           | 2             |
| 75411030 | 8000_Mixed | Corn, cooked, NS as to form, with cream sauce, made with milk                                                                | 40                 | 4                  | B           | 1             |
| 75411032 | 8000_Mixed | Corn, cooked, from frozen, with cream sauce, made with milk                                                                  | 40                 | 4                  | B           | 1             |
| 58104190 | 8000_Mixed | Nachos with chicken, cheese, and sour cream                                                                                  | 40                 | 3.5                | B           | 2             |
| 27311310 | 8000_Mixed | Beef stew with potatoes and vegetables including carrots, broccoli, and/or dark-green leafy; tomato-based sauce              | 40                 | 4.5                | B           | 2             |
| 27231000 | 8000_Mixed | Lamb or mutton and potatoes with gravy                                                                                       | 40                 | 4.5                | B           | 2             |
| 58100300 | 8000_Mixed | Burrito with beans and rice, meatless                                                                                        | 40                 | 3.5                | C           | 3             |
| 27564420 | 8000_Mixed | Frankfurter or hot dog sandwich, meatless, plain, on bun                                                                     | 40                 | 4                  | B           | 4             |
| 27510206 | 8000_Mixed | Cheeseburger, 1 small patty, with condiments, on wheat bun                                                                   | 40                 | 3.5                | C           | 3             |
| 27510207 | 8000_Mixed | Cheeseburger, 1 small patty, with condiments, on whole wheat bun                                                             | 40                 | 3.5                | C           | 3             |
| 75400500 | 8000_Mixed | Artichokes, stuffed                                                                                                          | 40                 | 4                  | A           | 3             |
| 58101930 | 8000_Mixed | Taco or tostada salad with meat                                                                                              | 40                 | 4                  | A           | 2             |
| 58160480 | 8000_Mixed | Rice, white, with carrots, fat added in cooking                                                                              | 40                 | 4                  | B           | 2             |
| 58160460 | 8000_Mixed | Rice, white, with carrots, NS as to fat added in cooking                                                                     | 40                 | 4                  | B           | 2             |
| 58130020 | 8000_Mixed | Lasagna with meat and spinach                                                                                                | 40                 | 3                  | C           | 2             |
| 58160670 | 8000_Mixed | Rice, white, with carrots, dark green vegetables, and tomatoes and/or tomato-based sauce, NS as to fat added in cooking      | 40                 | 4                  | B           | 2             |
| 58160690 | 8000_Mixed | Rice, white, with carrots, dark green vegetables, and tomatoes and/or tomato-based sauce, fat added in cooking               | 40                 | 4                  | B           | 2             |
| 27313010 | 8000_Mixed | Beef, noodles, and vegetables including carrots, broccoli, and/or dark-green leafy; no sauce                                 | 39                 | 3.5                | A           | 2             |
| 58109110 | 8000_Mixed | Pizza, cheese, gluten-free thick crust                                                                                       | 39                 | 3                  | C           | 4             |
| 27564302 | 8000_Mixed | Frankfurter or hot dog sandwich, reduced fat or light, plain, on whole wheat bun                                             | 39                 | 3.5                | B           | 4             |
| 27218310 | 8000_Mixed | Stewed corned beef, Puerto Rican style                                                                                       | 39                 | 4                  | C           | 2             |
| 58100330 | 8000_Mixed | Burrito with beans, rice, and sour cream, meatless                                                                           | 39                 | 3.5                | C           | 2             |
| 27220110 | 8000_Mixed | Pork and rice with tomato-based sauce                                                                                        | 39                 | 3.5                | B           | 2             |
| 27510632 | 8000_Mixed | Hamburger, 1 medium patty, plain, on wheat bun                                                                               | 39                 | 3.5                | C           | 3             |
| 27510633 | 8000_Mixed | Hamburger, 1 medium patty, plain, on whole wheat bun                                                                         | 39                 | 3.5                | C           | 3             |
| 27320025 | 8000_Mixed | Ham or pork, noodles and vegetables excluding carrots, broccoli, and dark-green leafy; no sauce                              | 39                 | 3.5                | A           | 2             |

| foodcode | level1nd   | Description                                                                                                                    | Food Compass Score | Health Star Rating | Nutri-Score | NOVA Category |
|----------|------------|--------------------------------------------------------------------------------------------------------------------------------|--------------------|--------------------|-------------|---------------|
| 27545010 | 8000_Mixed | Turkey or chicken burger, with condiments, on bun, from fast food / restaurant                                                 | 39                 | 3.5                | B           | 3             |
| 27545200 | 8000_Mixed | Turkey or chicken burger, with condiments, on white bun                                                                        | 39                 | 3.5                | B           | 3             |
| 28141050 | 8000_Mixed | Chicken patty parmigiana, breaded, with vegetable, diet frozen meal                                                            | 39                 | 4                  | B           | 4             |
| 75460710 | 8000_Mixed | Vegetable combinations, excluding carrots, broccoli, and dark-green leafy; cooked, with pasta                                  | 39                 | 4.5                | A           | 3             |
| 27347240 | 8000_Mixed | Chicken or turkey, dumplings, and vegetables including carrots, broccoli, and/or dark green leafy; gravy                       | 39                 | 3.5                | B           | 2             |
| 27510252 | 8000_Mixed | Cheeseburger, 1 medium patty, with condiments, on wheat bun                                                                    | 39                 | 3.5                | C           | 3             |
| 27510253 | 8000_Mixed | Cheeseburger, 1 medium patty, with condiments, on whole wheat bun                                                              | 39                 | 3.5                | C           | 3             |
| 28360210 | 8000_Mixed | Spanish vegetable soup, Puerto Rican style                                                                                     | 39                 | 4                  | C           | 2             |
| 58101725 | 8000_Mixed | Taco or tostada with beans and sour cream                                                                                      | 39                 | 4.5                | B           | 3             |
| 58160520 | 8000_Mixed | Rice, white, with tomatoes and/or tomato-based sauce, NS as to fat added in cooking                                            | 39                 | 4                  | B           | 2             |
| 58160540 | 8000_Mixed | Rice, white, with tomatoes and/or tomato-based sauce, fat added in cooking                                                     | 39                 | 4                  | B           | 2             |
| 27211550 | 8000_Mixed | Stewed, seasoned, ground beef with potatoes, Mexican style                                                                     | 39                 | 4                  | A           | 1             |
| 28310150 | 8000_Mixed | Oxtail soup                                                                                                                    | 39                 | 3.5                | A           | 1             |
| 27120060 | 8000_Mixed | Sweet and sour pork                                                                                                            | 39                 | 3                  | C           | 2             |
| 27221150 | 8000_Mixed | Pork stew, with potatoes, tomato-based sauce, Mexican style                                                                    | 39                 | 3.5                | B           | 2             |
| 27350020 | 8000_Mixed | Paella with seafood                                                                                                            | 39                 | 3.5                | B           | 2             |
| 58146332 | 8000_Mixed | Pasta with tomato-based sauce, meat, and added vegetables, home recipe                                                         | 39                 | 4                  | A           | 1             |
| 58149110 | 8000_Mixed | Noodle pudding                                                                                                                 | 39                 | 3.5                | B           | 3             |
| 27345020 | 8000_Mixed | Chicken or turkey, rice, and vegetables excluding carrots, broccoli, and dark-green leafy; no sauce                            | 39                 | 3.5                | A           | 2             |
| 58160580 | 8000_Mixed | Rice, white, with carrots and tomatoes and/or tomato-based sauce, NS as to fat added in cooking                                | 2                  | B                  | 2           | 2             |
| 58160600 | 8000_Mixed | Rice, white, with carrots and tomatoes and/or tomato-based sauce, fat added in cooking                                         | 2                  | B                  | 2           | 2             |
| 58100630 | 8000_Mixed | Enchilada with chicken, red-chile or enchilada sauce                                                                           | 2                  | A                  | 2           | 2             |
| 27213100 | 8000_Mixed | Beef and rice with tomato-based sauce                                                                                          | 2                  | 3.5                | B           | 2             |
| 58109015 | 8000_Mixed | Pizza, cheese, whole wheat thin crust                                                                                          | 2                  | 3.5                | C           | 2             |
| 58146721 | 8000_Mixed | Pasta, whole grain, with cream sauce and poultry, restaurant                                                                   | 2                  | 2.5                | C           | 4             |
| 75600150 | 8000_Mixed | Soup, cream of, NFS                                                                                                            | 2                  | 3.5                | B           | 2             |
| 27313310 | 8000_Mixed | Beef, noodles, and vegetables including carrots, broccoli, and/or dark-green leafy; mushroom sauce                             | 2                  | 3.5                | B           | 2             |
| 71801100 | 8000_Mixed | Potato and cheese soup                                                                                                         | 2                  | 4                  | B           | 3             |
| 58146210 | 8000_Mixed | Pasta with sauce, NFS                                                                                                          | 2                  | 4                  | A           | 1             |
| 58146322 | 8000_Mixed | Pasta with tomato-based sauce and meat, home recipe                                                                            | 2                  | 4                  | A           | 1             |
| 75607100 | 8000_Mixed | Mushroom soup, cream of, canned, reduced sodium, prepared with milk                                                            | 2                  | 3.5                | B           | 2             |
| 58146451 | 8000_Mixed | Pasta with cream sauce, seafood, and added vegetables, restaurant                                                              | 2                  | 3                  | C           | 3             |
| 58104520 | 8000_Mixed | Chimichanga, meatless                                                                                                          | 2                  | 4                  | B           | 3             |
| 58104270 | 8000_Mixed | Gordita, sope, or chalupa with beans and sour cream                                                                            | 2                  | 4                  | B           | 3             |
| 27211190 | 8000_Mixed | Beef and potatoes with cream sauce, white sauce or mushroom sauce                                                              | 2                  | 3.5                | B           | 1             |
| 58115110 | 8000_Mixed | Tamale casserole, Puerto Rican style                                                                                           | 2                  | 4                  | B           | 1             |
| 27211500 | 8000_Mixed | Beef and potatoes with cheese sauce                                                                                            | 2                  | 4                  | B           | 2             |
| 27250830 | 8000_Mixed | Fish and rice with mushroom sauce                                                                                              | 2                  | 3.5                | B           | 2             |
| 75142000 | 8000_Mixed | Cucumber and vegetable namasu                                                                                                  | 2                  | 4                  | C           | 2             |
| 27443110 | 8000_Mixed | Chicken or turkey a la king with vegetables including carrots, broccoli, and/or dark-green leafy; no potatoes, cream, white, c | 2                  | 3                  | C           | 2             |
| 75604010 | 8000_Mixed | Corn soup, cream of, prepared with milk                                                                                        | 2                  | 4                  | B           | 2             |
| 28315050 | 8000_Mixed | Beef vegetable soup with potato, pasta, or rice, chunky style, canned, or ready-to-serve                                       | 2                  | 4.5                | B           | 4             |
| 27136050 | 8000_Mixed | Venison or deer with tomato-based sauce                                                                                        | 2                  | 4                  | B           | 1             |
| 28141650 | 8000_Mixed | Chicken and vegetables au gratin with rice, diet frozen entree                                                                 | 2                  | 3.5                | B           | 4             |
| 58421010 | 8000_Mixed | Sopa Seca de Fideo, Mexican style, made with dry noodles, home recipe                                                          | 2                  | 4                  | C           | 2             |
| 58106830 | 8000_Mixed | Pizza with beans and vegetables, thick crust                                                                                   | 2                  | 3                  | B           | 3             |
| 58146303 | 8000_Mixed | Pasta with tomato-based sauce, and added vegetables, ready-to-heat                                                             | 2                  | 4.5                | B           | 4             |
| 58148180 | 8000_Mixed | Macaroni or pasta salad with cheese                                                                                            | 2                  | 3                  | C           | 3             |
| 71851010 | 8000_Mixed | Plantain soup, Puerto Rican style                                                                                              | 2                  | 4                  | C           | 1             |
| 27510342 | 8000_Mixed | Bacon cheeseburger, 1 medium patty, with condiments, on wheat bun                                                              | 2                  | 2                  | D           | 3             |
| 27510343 | 8000_Mixed | Bacon cheeseburger, 1 medium patty, with condiments, on whole wheat bun                                                        | 2                  | 2                  | D           | 3             |
| 58146693 | 8000_Mixed | Pasta, whole grain, with cream sauce, and added vegetables, ready-to-heat                                                      | 2                  | 3                  | C           | 4             |
| 27345420 | 8000_Mixed | Chicken or turkey, rice, and vegetables excluding carrots, broccoli, and dark-green leafy; cream sauce, white sauce, or mush   | 2                  | 3.5                | B           | 2             |
| 27135020 | 8000_Mixed | Veal scallopini                                                                                                                | 2                  | 3.5                | C           | 3             |
| 75411010 | 8000_Mixed | Corn, scalloped or pudding                                                                                                     | 2                  | 4                  | B           | 3             |
| 74601010 | 8000_Mixed | Tomato soup, cream of, prepared with milk                                                                                      | 2                  | 3.5                | B           | 2             |
| 58101615 | 8000_Mixed | Soft taco with beans and sour cream                                                                                            | 2                  | 4                  | B           | 3             |
| 75142500 | 8000_Mixed | Cucumber salad, made with sour cream dressing                                                                                  | 2                  | 4                  | C           | 2             |
| 27430410 | 8000_Mixed | Lamb or mutton stew with vegetables excluding carrots, broccoli, and dark-green leafy; no potatoes, gravy                      | 2                  | 4                  | A           | 2             |
| 27345220 | 8000_Mixed | Chicken or turkey, rice, and vegetables including carrots, broccoli, and dark-green leafy; gravy                               | 2                  | 3.5                | B           | 2             |
| 27570310 | 8000_Mixed | Hors d'oeuvres, with spread                                                                                                    | 2                  | 3.5                | A           | 3             |
| 27347230 | 8000_Mixed | Chicken or turkey, stuffing, and vegetables excluding carrots, broccoli, and dark-green leafy; gravy                           | 2                  | 3.5                | B           | 2             |
| 75611010 | 8000_Mixed | Vegetable soup, cream of, prepared with milk                                                                                   | 2                  | 3                  | C           | 3             |
| 27111440 | 8000_Mixed | Chili con carne with beans and cheese                                                                                          | 2                  | 4.5                | B           | 3             |
| 28345160 | 8000_Mixed | Chicken or turkey mushroom soup, cream of, prepared with milk                                                                  | 2                  | 3.5                | B           | 2             |
| 75607080 | 8000_Mixed | Mushroom with chicken soup, cream of, prepared with milk                                                                       | 2                  | 3.5                | B           | 2             |
| 27111430 | 8000_Mixed | Chili con carne, NS as to beans, with cheese                                                                                   | 2                  | 4.5                | B           | 3             |
| 27350070 | 8000_Mixed | Tuna pot pie                                                                                                                   | 2                  | 3.5                | B           | 3             |
| 27212120 | 8000_Mixed | Chili con carne with beans and macaroni                                                                                        | 2                  | 4                  | A           | 2             |
| 27313410 | 8000_Mixed | Beef, noodles, and vegetables including carrots, broccoli, and/or dark-green leafy; gravy                                      | 2                  | 3.5                | B           | 2             |
| 27330060 | 8000_Mixed | Lamb or mutton, rice, and vegetables including carrots, broccoli, and/or dark-green leafy; tomato-based sauce                  | 2                  | 3                  | B           | 2             |
| 27564340 | 8000_Mixed | Frankfurter or hot dog sandwich, reduced fat or light, plain, on whole grain white bread                                       | 2                  | 3.5                | B           | 4             |
| 58106345 | 8000_Mixed | Pizza with cheese and extra vegetables, thin crust                                                                             | 2                  | 3                  | C           | 3             |
| 58106736 | 8000_Mixed | Pizza with extra meat and extra vegetables, thin crust                                                                         | 2                  | 2                  | D           | 3             |
| 58146713 | 8000_Mixed | Pasta, whole grain, with cream sauce, meat, and added vegetables, ready-to-heat                                                | 2                  | 3.5                | B           | 4             |
| 27261500 | 8000_Mixed | Stewed, seasoned, ground beef and pork with potatoes, Mexican style                                                            | 2                  | 4                  | B           | 1             |
| 74604500 | 8000_Mixed | Tomato noodle soup, canned, prepared with water or ready-to-serve                                                              | 2                  | 4                  | B           | 2             |
| 27116400 | 8000_Mixed | Steak tartare                                                                                                                  | 2                  | 3.5                | C           | 1             |
| 27313020 | 8000_Mixed | Beef, noodles, and vegetables excluding carrots, broccoli, and dark-green leafy; no sauce                                      | 2                  | 3.5                | A           | 2             |
| 27418410 | 8000_Mixed | Beef steak with onions, Puerto Rican style                                                                                     | 2                  | 1.5                | E           | 3             |
| 58111130 | 8000_Mixed | Wonton, fried, filled with meat, poultry, or seafood, and vegetable                                                            | 2                  | 3                  | B           | 3             |
| 58160490 | 8000_Mixed | Rice, white, with peas and carrots, NS as to fat added in cooking                                                              | 2                  | 4                  | B           | 2             |
| 58160510 | 8000_Mixed | Rice, white, with peas and carrots, fat added in cooking                                                                       | 2                  | 4                  | B           | 2             |
| 58111110 | 8000_Mixed | Wonton, fried, filled with meat, poultry, or seafood,                                                                          | 2                  | 3                  | B           | 3             |
| 58104130 | 8000_Mixed | Nachos with meat and cheese                                                                                                    | 2                  | 3.5                | B           | 2             |
| 27242250 | 8000_Mixed | Chicken or turkey and noodles with mushroom sauce                                                                              | 2                  | 3.5                | B           | 2             |
| 58136160 | 8000_Mixed | Lo mein, with chicken                                                                                                          | 2                  | 3.5                | A           | 1             |
| 27320090 | 8000_Mixed | Sausage, noodles, and vegetables including carrots, broccoli, and/or dark-green leafy; tomato-based sauce                      | 2                  | 4                  | B           | 3             |
| 27242200 | 8000_Mixed | Chicken or turkey and noodles with gravy                                                                                       | 2                  | 3.5                | B           | 2             |
| 58146331 | 8000_Mixed | Pasta with tomato-based sauce, meat, and added vegetables, restaurant                                                          | 2                  | 3                  | C           | 4             |
| 58127150 | 8000_Mixed | Vegetables and cheese in pastry                                                                                                | 2                  | 3                  | C           | 4             |
| 58133140 | 8000_Mixed | Manicotti, vegetable- and cheese-filled, with tomato sauce, meatless                                                           | 2                  | 3.5                | B           | 2             |
| 27120100 | 8000_Mixed | Ham or pork with tomato-based sauce                                                                                            | 2                  | 4                  | B           | 1             |
| 58101945 | 8000_Mixed | Taco or tostada salad with meat and sour cream                                                                                 | 2                  | 4                  | B           | 2             |
| 14640016 | 8000_Mixed | Cheese sandwich, reduced fat American cheese, on wheat bread, no spread                                                        | 2                  | 2                  | D           | 4             |
| 14640018 | 8000_Mixed | Cheese sandwich, reduced fat American cheese, on whole wheat bread, no spread                                                  | 2                  | 2                  | D           | 4             |
| 27135050 | 8000_Mixed | Veal Marsala                                                                                                                   | 2                  | 4                  | B           | 2             |
| 58100800 | 8000_Mixed | Enchilada, just cheese, meatless, no beans, red-chile or enchilada sauce                                                       | 2                  | 3.5                | C           | 3             |
| 58163410 | 8000_Mixed | Spanish rice, fat added in cooking                                                                                             | 2                  | 4                  | B           | 2             |
| 73305010 | 8000_Mixed | Squash, winter, baked with cheese                                                                                              | 2                  | 4                  | B           | 3             |
| 27420020 | 8000_Mixed | Ham or pork salad                                                                                                              | 2                  | 2                  | D           | 4             |
| 28145000 | 8000_Mixed | Turkey dinner, NFS, frozen meal                                                                                                | 2                  | 4                  | B           | 4             |

| foodcode | level1nd   | Description                                                                                                                  | Food Compass Score | Health Star Rating | Nutri-Score | NOVA Category |
|----------|------------|------------------------------------------------------------------------------------------------------------------------------|--------------------|--------------------|-------------|---------------|
| 28145210 | 8000_Mixed | Turkey with gravy, dressing, potatoes, vegetable, frozen meal                                                                | 37                 | 4                  | B           | 4             |
| 41601110 | 8000_Mixed | Bean and ham soup, chunky style, canned or ready-to-serve                                                                    | 37                 | 4.5                | A           | 4             |
| 27311635 | 8000_Mixed | Beef, potatoes, and vegetables including carrots, broccoli, and/or dark-green leafy; cheese sauce                            | 37                 | 4                  | B           | 2             |
| 58146353 | 8000_Mixed | Pasta with tomato-based sauce, poultry, and added vegetables, ready-to-heat                                                  | 37                 | 4                  | A           | 4             |
| 58130015 | 8000_Mixed | Lasagna with meat, home recipe                                                                                               | 37                 | 3.5                | C           | 2             |
| 58134710 | 8000_Mixed | Tortellini, spinach-filled, with tomato sauce                                                                                | 37                 | 3                  | C           | 3             |
| 27540330 | 8000_Mixed | Turkey sandwich, with gravy                                                                                                  | 37                 | 4                  | B           | 3             |
| 27135110 | 8000_Mixed | Veal parmigiana                                                                                                              | 37                 | 3.5                | C           | 2             |
| 75460800 | 8000_Mixed | Vegetable combinations, including carrots, broccoli, and/or dark-green leafy; cooked, with butter sauce and pasta            | 37                 | 4                  | C           | 2             |
| 58157310 | 8000_Mixed | Congee, with meat, poultry, and/or seafood, and vegetables                                                                   | 37                 | 3.5                | B           | 1             |
| 27540295 | 8000_Mixed | Buffalo chicken submarine sandwich                                                                                           | 37                 | 3.5                | B           | 4             |
| 14640004 | 8000_Mixed | Cheese sandwich, American cheese, on wheat bread, no spread                                                                  | 37                 | 2                  | D           | 4             |
| 14640006 | 8000_Mixed | Cheese sandwich, American cheese, on whole wheat bread, no spread                                                            | 37                 | 2                  | D           | 4             |
| 41602010 | 8000_Mixed | Pea and ham soup, chunky style, canned or ready-to-serve                                                                     | 37                 | 4.5                | A           | 4             |
| 41602030 | 8000_Mixed | Split pea and ham soup                                                                                                       | 37                 | 4.5                | A           | 4             |
| 75608010 | 8000_Mixed | Onion soup, cream of, prepared with milk                                                                                     | 37                 | 3                  | C           | 2             |
| 27146350 | 8000_Mixed | Orange chicken                                                                                                               | 37                 | 2                  | D           | 1             |
| 58146223 | 8000_Mixed | Pasta with tomato-based sauce, ready-to-heat                                                                                 | 37                 | 4                  | B           | 4             |
| 58163430 | 8000_Mixed | Spanish rice, NS as to fat added in cooking                                                                                  | 37                 | 4                  | B           | 2             |
| 58128220 | 8000_Mixed | Dressing with chicken or turkey and vegetables                                                                               | 37                 | 3                  | C           | 3             |
| 58146681 | 8000_Mixed | Pasta, whole grain, with cream sauce, restaurant                                                                             | 37                 | 2                  | D           | 4             |
| 27120130 | 8000_Mixed | Pork stew, no potatoes, tomato-based sauce, Mexican style                                                                    | 36                 | 4                  | B           | 3             |
| 27313320 | 8000_Mixed | Beef, noodles, and vegetables excluding carrots, broccoli, and dark-green leafy; mushroom sauce                              | 36                 | 3.5                | B           | 2             |
| 58101735 | 8000_Mixed | Taco or tostada with chicken and beans                                                                                       | 36                 | 4                  | A           | 2             |
| 27111300 | 8000_Mixed | Beef stew, no potatoes, tomato-based sauce, Mexican style                                                                    | 36                 | 4                  | B           | 3             |
| 58104120 | 8000_Mixed | Nachos with cheese                                                                                                           | 36                 | 3                  | C           | 4             |
| 27510242 | 8000_Mixed | Cheeseburger, 1 medium patty, plain, on wheat bun                                                                            | 36                 | 2                  | D           | 3             |
| 27510243 | 8000_Mixed | Cheeseburger, 1 medium patty, plain, on whole wheat bun                                                                      | 36                 | 2                  | D           | 3             |
| 27510196 | 8000_Mixed | Cheeseburger, 1 small patty, plain, on wheat bun                                                                             | 36                 | 2                  | D           | 3             |
| 58104540 | 8000_Mixed | Chimichanga, meatless, with sour cream                                                                                       | 36                 | 3.5                | B           | 3             |
| 58136150 | 8000_Mixed | Lo mein, with beef                                                                                                           | 36                 | 4                  | A           | 1             |
| 58146343 | 8000_Mixed | Pasta with tomato-based sauce and poultry, ready-to-heat                                                                     | 36                 | 4                  | A           | 4             |
| 27118110 | 8000_Mixed | Meatballs, Puerto Rican style                                                                                                | 36                 | 2                  | D           | 2             |
| 58104160 | 8000_Mixed | Nachos with chili                                                                                                            | 36                 | 2.5                | C           | 3             |
| 28355110 | 8000_Mixed | Clam chowder, New England, NS as to prepared with water or milk                                                              | 36                 | 3.5                | B           | 4             |
| 27313420 | 8000_Mixed | Beef, noodles, and vegetables excluding carrots, broccoli, and dark-green leafy; gravy                                       | 36                 | 3.5                | B           | 2             |
| 14640022 | 8000_Mixed | Cheese sandwich, reduced fat Cheddar cheese, on wheat bread, no spread                                                       | 36                 | 2.5                | C           | 4             |
| 14640024 | 8000_Mixed | Cheese sandwich, reduced fat Cheddar cheese, on whole wheat bread, no spread                                                 | 36                 | 2.5                | C           | 4             |
| 58146701 | 8000_Mixed | Pasta, whole grain, with cream sauce and meat, restaurant                                                                    | 36                 | 2                  | D           | 4             |
| 58408500 | 8000_Mixed | Noodle soup with vegetables, Asian style                                                                                     | 36                 | 4.5                | B           | 2             |
| 58100220 | 8000_Mixed | Burrito with chicken and beans                                                                                               | 36                 | 2.5                | C           | 2             |
| 27116300 | 8000_Mixed | Beef with sweet and sour sauce                                                                                               | 36                 | 3.5                | B           | 2             |
| 41601160 | 8000_Mixed | Bean and ham soup, canned, reduced sodium, prepared with water or ready-to-serve                                             | 36                 | 5                  | A           | 4             |
| 27550710 | 8000_Mixed | Tuna salad sandwich, with lettuce                                                                                            | 36                 | 3.5                | B           | 4             |
| 75609010 | 8000_Mixed | Pea soup, prepared with milk                                                                                                 | 36                 | 3.5                | B           | 2             |
| 75605010 | 8000_Mixed | Leek soup, cream of, prepared with milk                                                                                      | 36                 | 3                  | C           | 2             |
| 27320500 | 8000_Mixed | Sweet and sour pork with rice                                                                                                | 36                 | 3.5                | B           | 2             |
| 58301020 | 8000_Mixed | Lasagna with cheese and sauce, diet frozen meal                                                                              | 36                 | 4                  | B           | 4             |
| 27246200 | 8000_Mixed | Chicken or turkey with stuffing                                                                                              | 36                 | 4                  | C           | 2             |
| 27347250 | 8000_Mixed | Chicken or turkey, dumplings, and vegetables excluding carrots, broccoli, and dark green leafy; gravy                        | 36                 | 3.5                | B           | 2             |
| 27213010 | 8000_Mixed | Biryani with meat                                                                                                            | 36                 | 4                  | A           | 1             |
| 27148010 | 8000_Mixed | Stuffed chicken, drumstick or breast, Puerto Rican style                                                                     | 36                 | 2                  | D           | 2             |
| 58155510 | 8000_Mixed | Soupy rice mixture with chicken and potatoes, Puerto Rican style                                                             | 36                 | 4                  | B           | 2             |
| 58130310 | 8000_Mixed | Lasagna, meatless                                                                                                            | 36                 | 4                  | B           | 4             |
| 58106737 | 8000_Mixed | Pizza with extra meat and extra vegetables, thick crust                                                                      | 36                 | 3.5                | C           | 3             |
| 27315310 | 8000_Mixed | Beef, rice, and vegetables including carrots, broccoli, and/or dark-green leafy; mushroom sauce                              | 36                 | 3.5                | B           | 2             |
| 58146441 | 8000_Mixed | Pasta with cream sauce and seafood, restaurant                                                                               | 36                 | 2.5                | D           | 3             |
| 27520160 | 8000_Mixed | Bacon, chicken, and tomato club sandwich, on multigrain roll with lettuce and spread                                         | 36                 | 3.5                | C           | 3             |
| 27118120 | 8000_Mixed | Stewed seasoned ground beef, Puerto Rican style                                                                              | 36                 | 3                  | D           | 2             |
| 58146723 | 8000_Mixed | Pasta, whole grain, with cream sauce and poultry, ready-to-heat                                                              | 35                 | 3                  | C           | 4             |
| 58148113 | 8000_Mixed | Macaroni or pasta salad, made with light mayonnaise-type salad dressing                                                      | 35                 | 3.5                | B           | 2             |
| 28143020 | 8000_Mixed | Chicken and vegetable entree with rice, diet frozen meal                                                                     | 35                 | 4                  | A           | 4             |
| 27564410 | 8000_Mixed | Frankfurter or hot dog sandwich, fat free, plain, on multigrain bread                                                        | 35                 | 3.5                | B           | 4             |
| 27516010 | 8000_Mixed | Gyro sandwich (pita bread, beef, lamb, onion, condiments), with tomato and spread                                            | 35                 | 4                  | A           | 2             |
| 27320080 | 8000_Mixed | Sausage, noodles, and vegetables excluding carrots, broccoli, and dark-green leafy; tomato-based sauce                       | 35                 | 4                  | B           | 3             |
| 58101625 | 8000_Mixed | Soft taco with chicken and beans                                                                                             | 35                 | 4                  | B           | 2             |
| 58101730 | 8000_Mixed | Taco or tostada with meat and beans                                                                                          | 35                 | 4                  | C           | 2             |
| 28160650 | 8000_Mixed | Stuffed green pepper, frozen meal                                                                                            | 35                 | 4.5                | B           | 4             |
| 27146250 | 8000_Mixed | Chicken or turkey cordon bleu                                                                                                | 35                 | 3.5                | D           | 2             |
| 32301100 | 8000_Mixed | Garlic egg soup, Puerto Rican style                                                                                          | 35                 | 3                  | C           | 2             |
| 27545000 | 8000_Mixed | Turkey or chicken burger, plain, on bun, from fast food / restaurant                                                         | 35                 | 4                  | B           | 3             |
| 27545100 | 8000_Mixed | Turkey or chicken burger, plain, on white bun                                                                                | 35                 | 4                  | B           | 3             |
| 58134130 | 8000_Mixed | Stuffed shells, cheese-filled, with meat sauce                                                                               | 35                 | 4                  | B           | 2             |
| 58100255 | 8000_Mixed | Burrito with chicken, beans, and rice                                                                                        | 35                 | 3                  | C           | 2             |
| 27315410 | 8000_Mixed | Beef, rice, and vegetables including carrots, broccoli, and/or dark-green leafy; gravy                                       | 35                 | 3.5                | B           | 2             |
| 27550720 | 8000_Mixed | Tuna salad sandwich                                                                                                          | 35                 | 3.5                | B           | 4             |
| 58106720 | 8000_Mixed | Pizza with meat and vegetables, from restaurant or fast food, thin crust                                                     | 35                 | 2                  | D           | 3             |
| 28141250 | 8000_Mixed | Chicken with rice and vegetable, diet frozen meal                                                                            | 35                 | 4                  | A           | 4             |
| 58155410 | 8000_Mixed | Soupy rice with chicken, Puerto Rican style                                                                                  | 35                 | 3.5                | C           | 2             |
| 71803010 | 8000_Mixed | Potato chowder                                                                                                               | 35                 | 3                  | C           | 2             |
| 75405010 | 8000_Mixed | Beets with Harvard sauce                                                                                                     | 35                 | 4                  | C           | 3             |
| 58100245 | 8000_Mixed | Burrito with chicken, beans, and sour cream                                                                                  | 35                 | 2.5                | C           | 2             |
| 27443120 | 8000_Mixed | Chicken or turkey a la king with vegetables excluding carrots, broccoli, and dark-green leafy; no potatoes, cream, white, or | 35                 | 3                  | D           | 3             |
| 75418040 | 8000_Mixed | Squash, summer, casserole, with cheese sauce                                                                                 | 35                 | 4.5                | B           | 3             |
| 58134160 | 8000_Mixed | Stuffed shells, cheese- and spinach- filled, no sauce                                                                        | 35                 | 3.5                | C           | 2             |
| 75607060 | 8000_Mixed | Mushroom soup, cream of, NS as to made with milk or water                                                                    | 35                 | 3                  | C           | 2             |
| 58122210 | 8000_Mixed | Gnocchi, cheese                                                                                                              | 35                 | 3                  | C           | 3             |
| 28143110 | 8000_Mixed | Chicken cacciatore with noodles, diet frozen meal                                                                            | 35                 | 4                  | A           | 4             |
| 58127510 | 8000_Mixed | Vegetable submarine sandwich, with spread                                                                                    | 35                 | 3.5                | C           | 4             |
| 27315010 | 8000_Mixed | Beef, rice, and vegetables including carrots, broccoli, and/or dark-green leafy; no sauce                                    | 35                 | 3.5                | B           | 2             |
| 58106350 | 8000_Mixed | Pizza with cheese and extra vegetables, thick crust                                                                          | 35                 | 3                  | B           | 3             |
| 58145120 | 8000_Mixed | Macaroni or noodles with cheese and tuna                                                                                     | 35                 | 3.5                | B           | 3             |
| 27220050 | 8000_Mixed | Ham or pork with stuffing                                                                                                    | 34                 | 3.5                | B           | 2             |
| 58134810 | 8000_Mixed | Cannelloni, cheese- and spinach-filled, no sauce                                                                             | 34                 | 3                  | C           | 2             |
| 71801010 | 8000_Mixed | Potato soup, cream of, prepared with milk                                                                                    | 34                 | 3                  | C           | 2             |
| 27243300 | 8000_Mixed | Chicken or turkey and rice with cream sauce                                                                                  | 34                 | 3.5                | B           | 3             |
| 58106320 | 8000_Mixed | Pizza, cheese, with vegetables, from restaurant or fast food, thin crust                                                     | 34                 | 2                  | D           | 3             |
| 58104530 | 8000_Mixed | Chimichanga with chicken                                                                                                     | 34                 | 2.5                | C           | 2             |
| 75607010 | 8000_Mixed | Mushroom soup, cream of, prepared with milk                                                                                  | 34                 | 3                  | C           | 2             |
| 27540320 | 8000_Mixed | Turkey salad or turkey spread sandwich                                                                                       | 34                 | 4                  | B           | 4             |
| 27311640 | 8000_Mixed | Beef, potatoes, and vegetables excluding carrots, broccoli, and dark-green leafy; cheese sauce                               | 34                 | 4                  | B           | 2             |
| 75601000 | 8000_Mixed | Asparagus soup, cream of, NS as to made with milk or water                                                                   | 34                 | 3                  | C           | 2             |

| foodcode | level1nd   | Description                                                                                                        | Food Compass Score | Health Star Rating | Nutri-Score | NOVA Category |
|----------|------------|--------------------------------------------------------------------------------------------------------------------|--------------------|--------------------|-------------|---------------|
| 27260100 | 8000_Mixed | Meat loaf made with beef and pork, with tomato-based sauce                                                         | 34                 | 3.5                | B           | 2             |
| 72202020 | 8000_Mixed | Broccoli casserole with rice                                                                                       | 34                 | 4                  | B           | 3             |
| 58109050 | 8000_Mixed | Pizza, cheese and vegetables, whole wheat thin crust                                                               | 34                 | 3.5                | A           | 2             |
| 58101540 | 8000_Mixed | Taco or tostada with fish                                                                                          | 34                 | 3                  | C           | 3             |
| 14640064 | 8000_Mixed | Cheese sandwich, reduced fat American cheese, on wheat bread, with butter                                          | 34                 | 1.5                | D           | 4             |
| 14640066 | 8000_Mixed | Cheese sandwich, reduced fat American cheese, on whole wheat bread, with butter                                    | 34                 | 1.5                | D           | 4             |
| 58160700 | 8000_Mixed | Rice, white, with other vegetables, NS as to fat added in cooking                                                  | 34                 | 3.5                | B           | 2             |
| 58160720 | 8000_Mixed | Rice, white, with other vegetables, fat added in cooking                                                           | 34                 | 3.5                | B           | 2             |
| 58100120 | 8000_Mixed | Burrito with meat and beans                                                                                        | 34                 | 3                  | C           | 2             |
| 58148111 | 8000_Mixed | Macaroni or pasta salad, made with light mayonnaise                                                                | 34                 | 3.5                | B           | 3             |
| 27220210 | 8000_Mixed | Ham and noodles, no sauce                                                                                          | 34                 | 3                  | B           | 2             |
| 58301050 | 8000_Mixed | Lasagna with cheese and meat sauce, diet frozen meal                                                               | 34                 | 4.5                | A           | 4             |
| 27120090 | 8000_Mixed | Ham or pork with mushroom sauce                                                                                    | 34                 | 4                  | B           | 1             |
| 27150130 | 8000_Mixed | Seafood newburg                                                                                                    | 34                 | 1.5                | D           | 1             |
| 58160400 | 8000_Mixed | Rice, white, with corn, NS as to fat added in cooking                                                              | 34                 | 4                  | B           | 2             |
| 58160420 | 8000_Mixed | Rice, white, with corn, fat added in cooking                                                                       | 34                 | 4                  | B           | 2             |
| 28315160 | 8000_Mixed | Italian Wedding Soup                                                                                               | 34                 | 4                  | B           | 2             |
| 58101750 | 8000_Mixed | Taco or tostada with chicken, beans, and sour cream                                                                | 34                 | 4                  | B           | 2             |
| 27213150 | 8000_Mixed | Chili con carne with beans and rice                                                                                | 34                 | 4                  | A           | 2             |
| 27214110 | 8000_Mixed | Meat loaf made with beef, with tomato-based sauce                                                                  | 34                 | 3.5                | C           | 2             |
| 28340180 | 8000_Mixed | Chicken or turkey broth, less or reduced sodium, canned or ready-to-serve                                          | 34                 | 3.5                | B           | 4             |
| 58100260 | 8000_Mixed | Burrito with chicken, beans, rice, and sour cream                                                                  | 34                 | 3                  | C           | 2             |
| 32300100 | 8000_Mixed | Egg drop soup                                                                                                      | 34                 | 3                  | C           | 1             |
| 75411033 | 8000_Mixed | Corn, cooked, from canned, with cream sauce, made with milk                                                        | 34                 | 4                  | C           | 2             |
| 58421000 | 8000_Mixed | Sopa seca, Mexican style, NFS                                                                                      | 34                 | 3.5                | C           | 2             |
| 58151220 | 8000_Mixed | Sushi roll tuna                                                                                                    | 34                 | 3.5                | B           | 2             |
| 27350090 | 8000_Mixed | Fish, noodles, and vegetables including carrots, broccoli, and/or dark green leafy; cheese sauce                   | 34                 | 3.5                | B           | 2             |
| 58107212 | 8000_Mixed | White pizza, cheese, with vegetables, thin crust                                                                   | 34                 | 3                  | C           | 2             |
| 14640160 | 8000_Mixed | Grilled cheese sandwich, reduced fat American cheese, on wheat bread                                               | 34                 | 1.5                | D           | 4             |
| 14640165 | 8000_Mixed | Grilled cheese sandwich, reduced fat American cheese, on whole wheat bread                                         | 34                 | 1.5                | D           | 4             |
| 27146200 | 8000_Mixed | Chicken or turkey with cheese sauce                                                                                | 34                 | 3.5                | C           | 2             |
| 58305250 | 8000_Mixed | Pasta with vegetable and cheese sauce, diet frozen meal                                                            | 34                 | 3.5                | B           | 4             |
| 27315320 | 8000_Mixed | Beef, rice, and vegetables excluding carrots, broccoli, and dark-green leafy; mushroom sauce                       | 34                 | 3.5                | B           | 2             |
| 27113200 | 8000_Mixed | Creamed chipped or dried beef                                                                                      | 34                 | 3                  | C           | 3             |
| 27236000 | 8000_Mixed | Venison or deer and noodles with cream or white sauce                                                              | 34                 | 3.5                | B           | 2             |
| 27510950 | 8000_Mixed | Reuben sandwich, corned beef sandwich with sauerkraut and cheese, with spread                                      | 34                 | 2                  | D           | 3             |
| 58146431 | 8000_Mixed | Pasta with cream sauce, poultry, and added vegetables, restaurant                                                  | 34                 | 3                  | C           | 2             |
| 28140730 | 8000_Mixed | Chicken patty, breaded, with tomato sauce and cheese, fettuccine alfredo, vegetable, frozen meal                   | 34                 | 4                  | A           | 4             |
| 58136140 | 8000_Mixed | Lo mein, with pork                                                                                                 | 34                 | 3.5                | A           | 1             |
| 72302020 | 8000_Mixed | Broccoli soup, prepared with water, home recipe, canned, or ready-to-serve                                         | 34                 | 3                  | B           | 4             |
| 14640052 | 8000_Mixed | Cheese sandwich, American cheese, on wheat bread, with butter                                                      | 34                 | 1.5                | E           | 4             |
| 14640054 | 8000_Mixed | Cheese sandwich, American cheese, on whole wheat bread, with butter                                                | 34                 | 1.5                | E           | 4             |
| 75601010 | 8000_Mixed | Asparagus soup, cream of, prepared with milk                                                                       | 34                 | 3                  | C           | 2             |
| 58106738 | 8000_Mixed | Pizza with extra meat and extra vegetables, medium crust                                                           | 34                 | 3.5                | C           | 3             |
| 58136120 | 8000_Mixed | Lo mein, meatless                                                                                                  | 34                 | 4                  | B           | 1             |
| 28150510 | 8000_Mixed | Fish in lemon-butter sauce with starch item, vegetable, frozen meal                                                | 34                 | 3.5                | B           | 4             |
| 58136110 | 8000_Mixed | Lo mein, NFS                                                                                                       | 33                 | 4                  | B           | 1             |
| 28110270 | 8000_Mixed | Sirloin beef, with gravy, potatoes, vegetable, frozen meal                                                         | 33                 | 4                  | A           | 4             |
| 58148112 | 8000_Mixed | Macaroni or pasta salad, made with mayonnaise-type salad dressing                                                  | 33                 | 3.5                | B           | 3             |
| 58131600 | 8000_Mixed | Ravioli, cheese and spinach-filled, with cream sauce                                                               | 33                 | 3                  | C           | 3             |
| 28110510 | 8000_Mixed | Beef, sliced, with gravy, potatoes, vegetable, frozen meal                                                         | 33                 | 4                  | B           | 4             |
| 14640110 | 8000_Mixed | Grilled cheese sandwich, American cheese, on wheat bread                                                           | 33                 | 1.5                | E           | 4             |
| 14640115 | 8000_Mixed | Grilled cheese sandwich, American cheese, on whole wheat bread                                                     | 33                 | 1.5                | E           | 4             |
| 27243000 | 8000_Mixed | Chicken or turkey and rice, no sauce                                                                               | 33                 | 3.5                | B           | 2             |
| 58116110 | 8000_Mixed | Meat turnover, Puerto Rican style                                                                                  | 33                 | 3.5                | C           | 2             |
| 58106330 | 8000_Mixed | Pizza, cheese, with vegetables, from restaurant or fast food, thick crust                                          | 33                 | 3                  | C           | 3             |
| 58100530 | 8000_Mixed | Enchilada with meat, red-chile or enchilada sauce                                                                  | 33                 | 4                  | A           | 3             |
| 58151430 | 8000_Mixed | Sushi, topped with shrimp                                                                                          | 33                 | 3.5                | A           | 2             |
| 58105000 | 8000_Mixed | Fajita with chicken and vegetables                                                                                 | 33                 | 3.5                | B           | 2             |
| 27564242 | 8000_Mixed | Frankfurter or hot dog sandwich, chicken and/or turkey, plain, on whole wheat bun                                  | 33                 | 2.5                | C           | 4             |
| 58109130 | 8000_Mixed | Pizza, with meat, gluten-free thick crust                                                                          | 33                 | 2                  | D           | 4             |
| 27564270 | 8000_Mixed | Frankfurter or hot dog sandwich, chicken and/or turkey, plain, on whole wheat bread                                | 33                 | 2.5                | C           | 4             |
| 27360090 | 8000_Mixed | Paella, NFS                                                                                                        | 33                 | 3                  | D           | 2             |
| 58100140 | 8000_Mixed | Burrito with meat, beans, and sour cream                                                                           | 33                 | 3                  | C           | 2             |
| 58106660 | 8000_Mixed | Pizza with extra meat, thick crust                                                                                 | 33                 | 2                  | D           | 3             |
| 28143080 | 8000_Mixed | Chicken with noodles and cheese sauce, diet frozen meal                                                            | 33                 | 4                  | A           | 4             |
| 58101745 | 8000_Mixed | Taco or tostada with meat, beans, and sour cream                                                                   | 33                 | 4                  | B           | 2             |
| 58106347 | 8000_Mixed | Pizza with cheese and extra vegetables, medium crust                                                               | 33                 | 3                  | B           | 3             |
| 27218110 | 8000_Mixed | Stuffed pot roast, with potatoes, Puerto Rican style                                                               | 33                 | 1.5                | E           | 2             |
| 58100160 | 8000_Mixed | Burrito with meat, beans, and rice                                                                                 | 33                 | 3                  | C           | 2             |
| 27430510 | 8000_Mixed | Veal goulash with vegetables including carrots, broccoli, and/or dark-green leafy; no potatoes, tomato-based sauce | 33                 | 4                  | A           | 3             |
| 58106730 | 8000_Mixed | Pizza with meat and vegetables, from restaurant or fast food, thick crust                                          | 33                 | 2.5                | D           | 3             |
| 27146011 | 8000_Mixed | Chicken, shredded or pulled, with barbecue sauce                                                                   | 33                 | 3.5                | D           | 2             |
| 27315420 | 8000_Mixed | Beef, rice, and vegetables excluding carrots, broccoli, and dark-green leafy; gravy                                | 33                 | 3.5                | B           | 2             |
| 58128110 | 8000_Mixed | Chicken cornbread                                                                                                  | 33                 | 3.5                | C           | 3             |
| 58101620 | 8000_Mixed | Soft taco with meat and beans                                                                                      | 33                 | 3.5                | C           | 2             |
| 74604600 | 8000_Mixed | Tomato noodle soup, canned, prepared with milk                                                                     | 33                 | 3.5                | B           | 2             |
| 58304400 | 8000_Mixed | Linguini with vegetables and seafood in white wine sauce, diet frozen meal                                         | 33                 | 3.5                | B           | 4             |
| 32203010 | 8000_Mixed | Egg salad sandwich                                                                                                 | 33                 | 3                  | C           | 4             |
| 27360010 | 8000_Mixed | Goulash, NFS                                                                                                       | 33                 | 3.5                | B           | 1             |
| 27430500 | 8000_Mixed | Veal goulash with vegetables excluding carrots, broccoli, and dark-green leafy; no potatoes, tomato-based sauce    | 33                 | 4                  | A           | 3             |
| 27411150 | 8000_Mixed | Beef rolls, stuffed with vegetables or meat mixture, tomato-based sauce                                            | 33                 | 4                  | C           | 2             |
| 27345230 | 8000_Mixed | Chicken or turkey, rice, corn, and cheese, with gravy                                                              | 33                 | 3.5                | C           | 3             |
| 27540310 | 8000_Mixed | Turkey sandwich, with spread                                                                                       | 33                 | 4                  | B           | 4             |
| 75414500 | 8000_Mixed | Okra, batter-dipped, fried                                                                                         | 33                 | 4                  | A           | 2             |
| 28113110 | 8000_Mixed | Salisbury steak, baked, with tomato sauce, vegetable, diet frozen meal                                             | 33                 | 4                  | A           | 4             |
| 14640010 | 8000_Mixed | Cheese sandwich, Cheddar cheese, on wheat bread, no spread                                                         | 33                 | 2                  | D           | 4             |
| 14640012 | 8000_Mixed | Cheese sandwich, Cheddar cheese, on whole wheat bread, no spread                                                   | 33                 | 2                  | D           | 4             |
| 27243400 | 8000_Mixed | Chicken or turkey and rice with mushroom sauce                                                                     | 33                 | 3.5                | B           | 2             |
| 58100165 | 8000_Mixed | Burrito with meat, beans, rice, and sour cream                                                                     | 33                 | 3                  | C           | 2             |
| 27246100 | 8000_Mixed | Chicken or turkey with dumplings                                                                                   | 33                 | 3.5                | B           | 2             |
| 28340310 | 8000_Mixed | Chicken or turkey gumbo soup, home recipe, canned or ready-to-serve                                                | 33                 | 4                  | C           | 4             |
| 58104500 | 8000_Mixed | Chimichanga with meat                                                                                              | 33                 | 2.5                | C           | 2             |
| 58301110 | 8000_Mixed | Vegetable lasagna, frozen meal                                                                                     | 33                 | 4                  | B           | 4             |
| 27221100 | 8000_Mixed | Stewed pig's feet, Puerto Rican style                                                                              | 33                 | 4                  | C           | 2             |
| 27250130 | 8000_Mixed | Shrimp and noodles with cheese sauce                                                                               | 33                 | 3.5                | B           | 2             |
| 58101635 | 8000_Mixed | Soft taco with chicken, beans, and sour cream                                                                      | 33                 | 3.5                | B           | 2             |
| 27564280 | 8000_Mixed | Frankfurter or hot dog sandwich, chicken and/or turkey, plain, on whole grain white bread                          | 32                 | 2.5                | C           | 4             |
| 27520165 | 8000_Mixed | Bacon, breaded fried chicken fillet, and tomato club with lettuce and spread                                       | 32                 | 3                  | C           | 3             |
| 28345020 | 8000_Mixed | Chicken or turkey soup, cream of, canned, reduced sodium, made with milk                                           | 32                 | 3.5                | B           | 2             |
| 14620330 | 8000_Mixed | Topping from meat and vegetable pizza                                                                              | 32                 | 1.5                | E           | 4             |
| 58106260 | 8000_Mixed | Pizza, extra cheese, thick crust                                                                                   | 32                 | 2.5                | D           | 3             |

| foodcode | level1nd   | Description                                                                                                   | Food Compass Score | Health Star Rating | Nutri-Score | NOVA Category |
|----------|------------|---------------------------------------------------------------------------------------------------------------|--------------------|--------------------|-------------|---------------|
| 51182020 | 8000_Mixed | Bread stuffing made with egg                                                                                  | 32                 | 2.5                | C           | 3             |
| 27113100 | 8000_Mixed | Beef stroganoff                                                                                               | 32                 | 3                  | C           | 2             |
| 58146703 | 8000_Mixed | Pasta, whole grain, with cream sauce and meat, ready-to-heat                                                  | 32                 | 3                  | C           | 4             |
| 27242300 | 8000_Mixed | Chicken or turkey and noodles with cream or white sauce                                                       | 32                 | 3.5                | B           | 2             |
| 27350100 | 8000_Mixed | Fish, noodles, and vegetables excluding carrots, broccoli, and dark-green leafy; cheese sauce                 | 32                 | 3.5                | B           | 2             |
| 58150530 | 8000_Mixed | Adobo, with rice                                                                                              | 32                 | 3.5                | C           | 1             |
| 58135110 | 8000_Mixed | Chow fun noodles with meat and vegetables                                                                     | 32                 | 4.5                | A           | 1             |
| 27317100 | 8000_Mixed | Beef, dumplings, and vegetables including carrots, broccoli, and/or dark-green leafy; gravy                   | 32                 | 3.5                | B           | 3             |
| 58200100 | 8000_Mixed | Wrap sandwich, filled with meat, poultry, or fish, vegetables, and rice                                       | 32                 | 3.5                | A           | 2             |
| 27319010 | 8000_Mixed | Stuffed green pepper, Puerto Rican style                                                                      | 32                 | 4                  | C           | 2             |
| 28160710 | 8000_Mixed | Stuffed cabbage, with meat and tomato sauce, diet frozen meal                                                 | 32                 | 4.5                | A           | 4             |
| 58104550 | 8000_Mixed | Chimichanga with chicken and sour cream                                                                       | 32                 | 2.5                | C           | 2             |
| 27111000 | 8000_Mixed | Beef with tomato-based sauce                                                                                  | 32                 | 4                  | B           | 1             |
| 58160560 | 8000_Mixed | Rice, white, with dark green vegetables, fat not added in cooking                                             | 32                 | 3.5                | B           | 1             |
| 27343950 | 8000_Mixed | Chicken or turkey, noodles, and vegetables including carrots, broccoli, and/or dark-green leafy; cheese sauce | 32                 | 3.5                | B           | 1             |
| 58403050 | 8000_Mixed | Chicken or turkey noodle soup, cream of, home recipe, canned, or ready-to-serve                               | 32                 | 3                  | C           | 2             |
| 75418000 | 8000_Mixed | Squash, summer, yellow or green, breaded or battered, baked                                                   | 32                 | 4.5                | A           | 1             |
| 58100145 | 8000_Mixed | Burrito with meat, beans, and sour cream, from fast food                                                      | 32                 | 4                  | B           | 2             |
| 27162010 | 8000_Mixed | Meat with tomato-based sauce                                                                                  | 32                 | 4                  | B           | 1             |
| 58301150 | 8000_Mixed | Zucchini lasagna, diet frozen meal                                                                            | 32                 | 4.5                | B           | 4             |
| 27564350 | 8000_Mixed | Frankfurter or hot dog sandwich, reduced fat or light, plain, on multigrain bread                             | 32                 | 3.5                | B           | 4             |
| 27135030 | 8000_Mixed | Veal with cream sauce                                                                                         | 32                 | 4                  | B           | 1             |
| 28140720 | 8000_Mixed | Chicken patty, or nuggets, boneless, breaded, potatoes, vegetable, frozen meal                                | 32                 | 4.5                | B           | 4             |
| 27161010 | 8000_Mixed | Meat loaf, Puerto Rican style                                                                                 | 32                 | 1.5                | D           | 2             |
| 58137300 | 8000_Mixed | Adobo, with noodles                                                                                           | 32                 | 3.5                | C           | 1             |
| 27212400 | 8000_Mixed | Beef and noodles with mushroom sauce                                                                          | 32                 | 3.5                | B           | 2             |
| 58146391 | 8000_Mixed | Pasta with cream sauce and added vegetables, restaurant                                                       | 32                 | 2.5                | C           | 2             |
| 27242350 | 8000_Mixed | Chicken or turkey tetrazzini                                                                                  | 31                 | 3.5                | B           | 3             |
| 27150060 | 8000_Mixed | Lobster newburg                                                                                               | 31                 | 1.5                | D           | 2             |
| 27214300 | 8000_Mixed | Beef wellington                                                                                               | 31                 | 2                  | D           | 3             |
| 58101555 | 8000_Mixed | Soft taco with fish                                                                                           | 31                 | 3.5                | C           | 2             |
| 58106655 | 8000_Mixed | Pizza with extra meat, medium crust                                                                           | 31                 | 2                  | D           | 3             |
| 58109120 | 8000_Mixed | Pizza, with meat, gluten-free thin crust                                                                      | 31                 | 2                  | D           | 4             |
| 58133120 | 8000_Mixed | Manicotti, cheese-filled, with tomato sauce, meatless                                                         | 31                 | 3                  | B           | 2             |
| 58145190 | 8000_Mixed | Macaroni or noodles with cheese and chicken or turkey                                                         | 31                 | 3.5                | B           | 3             |
| 58200300 | 8000_Mixed | Wrap sandwich, filled with meat, poultry, or fish, vegetables, rice, and cheese                               | 31                 | 3.5                | B           | 2             |
| 58131610 | 8000_Mixed | Ravioli, cheese and spinach filled, with tomato sauce                                                         | 31                 | 3.5                | C           | 2             |
| 58146411 | 8000_Mixed | Pasta with cream sauce, meat, and added vegetables, restaurant                                                | 31                 | 2.5                | C           | 2             |
| 28340630 | 8000_Mixed | Chicken or turkey vegetable soup with rice, stew type, chunky style                                           | 31                 | 4                  | B           | 4             |
| 27250820 | 8000_Mixed | Fish and rice with cream sauce                                                                                | 31                 | 3.5                | B           | 2             |
| 58133130 | 8000_Mixed | Manicotti, cheese-filled, with meat sauce                                                                     | 31                 | 3                  | C           | 2             |
| 75608100 | 8000_Mixed | Onion soup, French                                                                                            | 31                 | 3                  | C           | 2             |
| 27260090 | 8000_Mixed | Meat loaf made with beef, veal and pork                                                                       | 31                 | 3.5                | C           | 2             |
| 58165030 | 8000_Mixed | Rice, white, with vegetables and gravy, NS as to fat added in cooking                                         | 31                 | 4                  | B           | 2             |
| 58165050 | 8000_Mixed | Rice, white, with vegetables and gravy, fat added in cooking                                                  | 31                 | 4                  | B           | 2             |
| 27540296 | 8000_Mixed | Buffalo chicken submarine sandwich with cheese                                                                | 31                 | 3.5                | C           | 4             |
| 58101630 | 8000_Mixed | Soft taco with meat, beans, and sour cream                                                                    | 31                 | 3.5                | C           | 2             |
| 28110250 | 8000_Mixed | Sirloin tips, with gravy, potatoes, vegetable, frozen meal                                                    | 31                 | 4.5                | A           | 4             |
| 58146683 | 8000_Mixed | Pasta, whole grain, with cream sauce, ready-to-heat                                                           | 31                 | 3                  | C           | 4             |
| 75651110 | 8000_Mixed | Vegetable chicken rice soup, canned, prepared with water or ready-to-serve                                    | 31                 | 4                  | B           | 4             |
| 58304220 | 8000_Mixed | Rigatoni with meat sauce and cheese, diet frozen meal                                                         | 31                 | 4.5                | B           | 4             |
| 27136080 | 8000_Mixed | Venison or deer with gravy                                                                                    | 31                 | 4                  | B           | 2             |
| 27260080 | 8000_Mixed | Meat loaf made with beef and pork                                                                             | 31                 | 3.5                | C           | 2             |
| 27120020 | 8000_Mixed | Ham or pork with gravy                                                                                        | 31                 | 4                  | B           | 2             |
| 58135120 | 8000_Mixed | Chow fun noodles with vegetables, meatless                                                                    | 31                 | 4.5                | B           | 1             |
| 28340700 | 8000_Mixed | Bird's nest soup                                                                                              | 31                 | 3                  | C           | 1             |
| 27550100 | 8000_Mixed | Fish sandwich, on bun, with cheese and spread                                                                 | 31                 | 3                  | C           | 4             |
| 27214100 | 8000_Mixed | Meat loaf made with beef                                                                                      | 31                 | 3.5                | C           | 2             |
| 58134720 | 8000_Mixed | Tortellini, spinach-filled, no sauce                                                                          | 31                 | 3.5                | B           | 3             |
| 58304200 | 8000_Mixed | Ravioli, cheese-filled, with tomato sauce, diet frozen meal                                                   | 31                 | 4                  | B           | 4             |
| 74701000 | 8000_Mixed | Tomato sandwich                                                                                               | 31                 | 4                  | B           | 4             |
| 27235750 | 8000_Mixed | Veal and noodles with cream or white sauce                                                                    | 31                 | 3.5                | B           | 2             |
| 27315020 | 8000_Mixed | Beef, rice, and vegetables excluding carrots, broccoli, and dark-green leafy; no sauce                        | 31                 | 3.5                | B           | 2             |
| 58146421 | 8000_Mixed | Pasta with cream sauce and poultry, restaurant                                                                | 31                 | 2.5                | D           | 2             |
| 58163450 | 8000_Mixed | Spanish rice with ground beef                                                                                 | 31                 | 3.5                | B           | 2             |
| 27564122 | 8000_Mixed | Frankfurter or hot dog sandwich, beef and pork, plain, on whole wheat bun                                     | 31                 | 2                  | D           | 4             |
| 71801000 | 8000_Mixed | Potato soup, NS as to made with milk or water                                                                 | 31                 | 3                  | C           | 2             |
| 58156110 | 8000_Mixed | Fried rice, Puerto Rican style                                                                                | 30                 | 3                  | D           | 2             |
| 74601000 | 8000_Mixed | Tomato soup, NFS                                                                                              | 30                 | 4                  | B           | 4             |
| 27120120 | 8000_Mixed | Sausage gravy                                                                                                 | 30                 | 3                  | C           | 3             |
| 27250110 | 8000_Mixed | Scallops and noodles with cheese sauce                                                                        | 30                 | 3.5                | B           | 2             |
| 27111407 | 8000_Mixed | Chili con carne with beans, canned                                                                            | 30                 | 4.5                | A           | 4             |
| 58106325 | 8000_Mixed | Pizza, cheese, with vegetables, from restaurant or fast food, medium crust                                    | 30                 | 3                  | C           | 3             |
| 27162500 | 8000_Mixed | Stewed, seasoned, ground beef and pork, Mexican style                                                         | 30                 | 4                  | B           | 1             |
| 27260010 | 8000_Mixed | Meat loaf, NS as to type of meat                                                                              | 30                 | 3.5                | C           | 2             |
| 27343960 | 8000_Mixed | Chicken or turkey, noodles, and vegetables excluding carrots, broccoli, and dark-green leafy; cheese sauce    | 30                 | 3.5                | B           | 1             |
| 58302050 | 8000_Mixed | Beef and noodles with meat sauce and cheese, diet frozen meal                                                 | 30                 | 4                  | B           | 4             |
| 58134120 | 8000_Mixed | Stuffed shells, cheese-filled, with tomato sauce, meatless                                                    | 30                 | 3                  | C           | 2             |
| 75409020 | 8000_Mixed | Cauliflower, batter-dipped, fried                                                                             | 30                 | 4                  | C           | 3             |
| 58163405 | 8000_Mixed | Spanish rice, from restaurant                                                                                 | 30                 | 3.5                | C           | 1             |
| 58145111 | 8000_Mixed | Macaroni or noodles with cheese, from restaurant                                                              | 30                 | 3                  | C           | 1             |
| 58104340 | 8000_Mixed | Gordita, sope, or chalupa with chicken                                                                        | 30                 | 3                  | C           | 2             |
| 27212200 | 8000_Mixed | Beef and noodles with gravy                                                                                   | 30                 | 3.5                | B           | 2             |
| 58131320 | 8000_Mixed | Ravioli, meat-filled, with tomato sauce or meat sauce                                                         | 30                 | 3.5                | C           | 2             |
| 74605010 | 8000_Mixed | Tomato rice soup, prepared with water                                                                         | 30                 | 4                  | C           | 4             |
| 27550000 | 8000_Mixed | Fish sandwich, on bun, with spread                                                                            | 30                 | 3                  | C           | 4             |
| 58100020 | 8000_Mixed | Burrito, taco, or quesadilla with egg, beans, and breakfast meat                                              | 30                 | 3                  | C           | 3             |
| 27212350 | 8000_Mixed | Beef stroganoff with noodles                                                                                  | 30                 | 3.5                | B           | 2             |
| 75651020 | 8000_Mixed | Vegetable beef soup, canned, prepared with water, or ready-to-serve                                           | 30                 | 4                  | B           | 4             |
| 27113000 | 8000_Mixed | Beef with cream or white sauce                                                                                | 30                 | 4                  | C           | 1             |
| 75651030 | 8000_Mixed | Vegetable beef noodle soup, prepared with water                                                               | 30                 | 4                  | B           | 4             |
| 75651080 | 8000_Mixed | Vegetable beef soup with rice, canned, prepared with water or ready-to-serve                                  | 30                 | 4                  | B           | 4             |
| 58163400 | 8000_Mixed | Flavored rice and pasta mixture, reduced sodium                                                               | 30                 | 3.5                | B           | 2             |
| 58105050 | 8000_Mixed | Fajita with meat and vegetables                                                                               | 30                 | 3.5                | B           | 3             |
| 73211110 | 8000_Mixed | Sweet potato and pumpkin casserole, Puerto Rican style                                                        | 30                 | 3.5                | C           | 3             |
| 58421060 | 8000_Mixed | Sopa seca de arroz, home recipe, Mexican style                                                                | 30                 | 3.5                | C           | 2             |
| 58109020 | 8000_Mixed | Pizza, cheese, whole wheat thick crust                                                                        | 30                 | 3                  | C           | 2             |
| 27564182 | 8000_Mixed | Frankfurter or hot dog sandwich, meat and poultry, plain, on whole wheat bun                                  | 30                 | 2                  | D           | 4             |
| 27142100 | 8000_Mixed | Chicken or turkey fricassee                                                                                   | 30                 | 3.5                | B           | 2             |
| 58151450 | 8000_Mixed | Sushi, topped with egg                                                                                        | 30                 | 3.5                | B           | 1             |
| 58105075 | 8000_Mixed | Fajita with vegetables                                                                                        | 30                 | 4                  | C           | 3             |
| 28110150 | 8000_Mixed | Beef with vegetable, diet frozen meal                                                                         | 30                 | 4                  | B           | 4             |



| foodcode | level1nd   | Description                                                                                              | Food Compass Score | Health Star Rating | Nutri-Score | NOVA Category |
|----------|------------|----------------------------------------------------------------------------------------------------------|--------------------|--------------------|-------------|---------------|
| 58200250 | 8000_Mixed | Wrap sandwich, filled with vegetables                                                                    | 30                 | 4                  | C           | 3             |
| 28340179 | 8000_Mixed | Beef broth, less or reduced sodium, canned or ready-to-serve                                             | 30                 | 3.5                | B           | 4             |
| 58200200 | 8000_Mixed | Wrap sandwich, filled with vegetables and rice                                                           | 29                 | 4                  | B           | 2             |
| 27317110 | 8000_Mixed | Beef, dumplings, and vegetables excluding carrots, broccoli, and dark-green leafy; gravy                 | 29                 | 3.5                | B           | 3             |
| 58147340 | 8000_Mixed | Macaroni or noodles, creamed, with cheese and tuna                                                       | 29                 | 3.5                | A           | 3             |
| 58146333 | 8000_Mixed | Pasta with tomato-based sauce, meat, and added vegetables, ready-to-heat                                 | 29                 | 4                  | A           | 4             |
| 28143130 | 8000_Mixed | Chicken and vegetable entree with noodles, frozen meal                                                   | 29                 | 4                  | A           | 4             |
| 27111500 | 8000_Mixed | Beef sloppy joe, no bun                                                                                  | 29                 | 3.5                | C           | 2             |
| 74602010 | 8000_Mixed | Tomato soup, prepared with water, or ready-to-serve                                                      | 29                 | 4                  | B           | 4             |
| 74606010 | 8000_Mixed | Tomato vegetable soup, prepared with water                                                               | 29                 | 4                  | B           | 4             |
| 27540270 | 8000_Mixed | Chicken fillet, broiled, sandwich, with lettuce, tomato, and non-mayonnaise type spread                  | 29                 | 4                  | B           | 4             |
| 58122310 | 8000_Mixed | Knish, potato                                                                                            | 29                 | 2.5                | C           | 3             |
| 27540235 | 8000_Mixed | Chicken fillet, broiled, sandwich with lettuce, tomato, and spread                                       | 29                 | 4                  | B           | 4             |
| 58146120 | 8000_Mixed | Pasta with tomato-based sauce, cheese and meat                                                           | 29                 | 3.5                | B           | 2             |
| 58201045 | 8000_Mixed | Jelly sandwich, reduced sugar jelly, on wheat bread                                                      | 29                 | 3.5                | A           | 4             |
| 58201055 | 8000_Mixed | Jelly sandwich, reduced sugar jelly, on whole wheat bread                                                | 29                 | 3.5                | A           | 4             |
| 58104180 | 8000_Mixed | Nachos with meat, cheese, and sour cream                                                                 | 29                 | 3.5                | B           | 4             |
| 58146452 | 8000_Mixed | Pasta with cream sauce, seafood, and added vegetables, home recipe                                       | 29                 | 3.5                | B           | 3             |
| 58146323 | 8000_Mixed | Pasta with tomato-based sauce and meat, ready-to-heat                                                    | 29                 | 4                  | A           | 4             |
| 27111420 | 8000_Mixed | Chili con carne without beans                                                                            | 29                 | 3                  | C           | 4             |
| 27120080 | 8000_Mixed | Ham stroganoff                                                                                           | 29                 | 2.5                | D           | 2             |
| 58109030 | 8000_Mixed | Pizza, with meat, whole wheat thin crust                                                                 | 29                 | 2.5                | C           | 3             |
| 58160000 | 8000_Mixed | Biryani with vegetables                                                                                  | 29                 | 4.5                | B           | 1             |
| 27420200 | 8000_Mixed | Pork hash                                                                                                | 29                 | 3                  | D           | 2             |
| 75418030 | 8000_Mixed | Squash, summer, casserole, with rice and tomato sauce                                                    | 29                 | 4.5                | B           | 3             |
| 58100235 | 8000_Mixed | Burrito with chicken and sour cream                                                                      | 29                 | 2                  | D           | 2             |
| 28320130 | 8000_Mixed | Ham, rice, and potato soup, Puerto Rican style                                                           | 29                 | 4                  | B           | 2             |
| 28143190 | 8000_Mixed | Chicken in mushroom sauce, white and wild rice, vegetable, frozen meal                                   | 29                 | 4                  | B           | 4             |
| 27564150 | 8000_Mixed | Frankfurter or hot dog sandwich, beef and pork, plain, on whole wheat bread                              | 29                 | 2                  | D           | 4             |
| 58165060 | 8000_Mixed | Rice, white, with vegetables, soy-based sauce, NS as to fat added in cooking                             | 29                 | 4                  | C           | 2             |
| 58165080 | 8000_Mixed | Rice, white, with vegetables, soy-based sauce, fat added in cooking                                      | 29                 | 4                  | C           | 2             |
| 27564160 | 8000_Mixed | Frankfurter or hot dog sandwich, beef and pork, plain, on whole grain white bread                        | 29                 | 2                  | D           | 4             |
| 27146400 | 8000_Mixed | Chicken Kiev                                                                                             | 29                 | 2                  | D           | 3             |
| 27212300 | 8000_Mixed | Beef and noodles with cream or white sauce                                                               | 29                 | 3.5                | B           | 1             |
| 58100200 | 8000_Mixed | Burrito with chicken                                                                                     | 29                 | 2                  | D           | 2             |
| 58146401 | 8000_Mixed | Pasta with cream sauce and meat, restaurant                                                              | 29                 | 2                  | D           | 2             |
| 75414020 | 8000_Mixed | Mushrooms, stuffed                                                                                       | 29                 | 4                  | D           | 4             |
| 27320030 | 8000_Mixed | Ham or pork, noodles and vegetables excluding carrots, broccoli, and dark-green leafy; cheese sauce      | 29                 | 3.5                | B           | 2             |
| 58160620 | 8000_Mixed | Rice, white, with dark green vegetables and tomatoes and/or tomato-based sauce, fat not added in cooking | 29                 | 4                  | B           | 1             |
| 58104290 | 8000_Mixed | Gordita, sope, or chalupa with meat                                                                      | 29                 | 3                  | C           | 2             |
| 27510346 | 8000_Mixed | Bacon cheeseburger, 1 large patty, with condiments, on bun, from fast food / restaurant                  | 29                 | 3                  | D           | 3             |
| 27330080 | 8000_Mixed | Lamb or mutton, rice, and vegetables including carrots, broccoli, and/or dark-green leafy; gravy         | 29                 | 3.5                | B           | 2             |
| 58122330 | 8000_Mixed | Knish, meat                                                                                              | 29                 | 2                  | D           | 2             |
| 75603020 | 8000_Mixed | Celery soup, cream of, prepared with water, home recipe, canned or ready-to-serve                        | 29                 | 4                  | B           | 4             |
| 27341000 | 8000_Mixed | Chicken or turkey, potatoes, corn, and cheese, with gravy                                                | 28                 | 4                  | B           | 4             |
| 58100005 | 8000_Mixed | Burrito, taco, or quesadilla with egg and potato                                                         | 28                 | 3                  | C           | 3             |
| 58306200 | 8000_Mixed | Chicken fajitas, diet frozen meal                                                                        | 28                 | 4                  | A           | 4             |
| 28145100 | 8000_Mixed | Turkey with gravy, dressing, vegetable and fruit, diet frozen meal                                       | 28                 | 4.5                | A           | 4             |
| 58104320 | 8000_Mixed | Gordita, sope, or chalupa with chicken and sour cream                                                    | 28                 | 3                  | C           | 2             |
| 27564502 | 8000_Mixed | Frankfurter or hot dog sandwich, with meatless chili, on whole wheat bun                                 | 28                 | 3                  | C           | 4             |
| 27220310 | 8000_Mixed | Ham or pork and rice, no sauce                                                                           | 28                 | 3.5                | B           | 2             |
| 27541000 | 8000_Mixed | Turkey, ham, and roast beef club sandwich, with lettuce, tomato and spread                               | 28                 | 3.5                | C           | 3             |
| 14640038 | 8000_Mixed | Cheese sandwich, reduced fat American cheese, on white bread, with mayonnaise                            | 28                 | 2                  | D           | 4             |
| 58304250 | 8000_Mixed | Manicotti, cheese-filled, with tomato sauce, diet frozen meal                                            | 28                 | 4                  | B           | 4             |
| 58160440 | 8000_Mixed | Rice, white, with peas, fat not added in cooking                                                         | 28                 | 4                  | A           | 1             |
| 27564220 | 8000_Mixed | Frankfurter or hot dog sandwich, meat and poultry, plain, on whole grain white bread                     | 28                 | 2                  | D           | 4             |
| 28154010 | 8000_Mixed | Shrimp and vegetables in sauce with noodles, diet frozen meal                                            | 28                 | 4                  | B           | 4             |
| 75608200 | 8000_Mixed | Onion soup, made from dry mix                                                                            | 28                 | 3                  | C           | 4             |
| 27260050 | 8000_Mixed | Meatballs, with breading, NS as to type of meat, with gravy                                              | 28                 | 3.5                | C           | 2             |
| 58131120 | 8000_Mixed | Ravioli, NS as to filling, with cream sauce                                                              | 28                 | 3.5                | B           | 2             |
| 75418220 | 8000_Mixed | Creamed christophine, Puerto Rican style                                                                 | 28                 | 3.5                | C           | 3             |
| 58106650 | 8000_Mixed | Pizza with extra meat, thin crust                                                                        | 28                 | 2                  | D           | 3             |
| 27564210 | 8000_Mixed | Frankfurter or hot dog sandwich, meat and poultry, plain, on whole wheat bread                           | 28                 | 2                  | D           | 4             |
| 58101520 | 8000_Mixed | Taco or tostada with chicken                                                                             | 28                 | 3                  | C           | 2             |
| 58134610 | 8000_Mixed | Tortellini, meat-filled, with tomato sauce                                                               | 28                 | 3                  | C           | 3             |
| 58160650 | 8000_Mixed | Rice, white, with carrots and dark green vegetables, fat not added in cooking                            | 28                 | 3.5                | B           | 1             |
| 58120120 | 8000_Mixed | Crepe, filled with meat, poultry, or seafood, no sauce                                                   | 28                 | 3                  | C           | 3             |
| 58145140 | 8000_Mixed | Macaroni or noodles with cheese and tomato                                                               | 28                 | 4                  | B           | 3             |
| 14710100 | 8000_Mixed | Cheddar cheese soup, home recipe, canned or ready-to-serve                                               | 28                 | 3                  | C           | 2             |
| 27220010 | 8000_Mixed | Meat loaf made with ham                                                                                  | 28                 | 2                  | D           | 3             |
| 75410550 | 8000_Mixed | Jalapeno pepper, stuffed with cheese, breaded or battered, fried                                         | 28                 | 3.5                | C           | 3             |
| 58157300 | 8000_Mixed | Congee, with meat, poultry, and/or seafood                                                               | 27                 | 3.5                | A           | 1             |
| 58131110 | 8000_Mixed | Ravioli, NS as to filling, with tomato sauce                                                             | 27                 | 3                  | B           | 2             |
| 58404500 | 8000_Mixed | Matzo ball soup                                                                                          | 27                 | 3.5                | B           | 3             |
| 14710200 | 8000_Mixed | Beer cheese soup, made with milk                                                                         | 27                 | 2                  | D           | 2             |
| 58125110 | 8000_Mixed | Quiche with meat, poultry or fish                                                                        | 27                 | 1                  | E           | 3             |
| 58107050 | 8000_Mixed | Pizza, no cheese, thin crust                                                                             | 27                 | 3                  | D           | 2             |
| 55703000 | 8000_Mixed | Cake made with glutinous rice and dried beans                                                            | 27                 | 3                  | C           | 1             |
| 58130016 | 8000_Mixed | Lasagna with meat, frozen                                                                                | 27                 | 4                  | B           | 4             |
| 27213400 | 8000_Mixed | Beef and rice with mushroom sauce                                                                        | 27                 | 3.5                | B           | 2             |
| 58104280 | 8000_Mixed | Gordita, sope, or chalupa with meat and sour cream                                                       | 27                 | 3                  | C           | 2             |
| 58156410 | 8000_Mixed | Rice with onions, Puerto Rican style                                                                     | 27                 | 4                  | C           | 4             |
| 27114000 | 8000_Mixed | Beef with mushroom sauce                                                                                 | 27                 | 4                  | B           | 2             |
| 58130011 | 8000_Mixed | Lasagna with meat                                                                                        | 27                 | 4                  | B           | 4             |
| 58100015 | 8000_Mixed | Burrito, taco, or quesadilla with egg, potato, and breakfast meat                                        | 27                 | 2                  | D           | 3             |
| 14640026 | 8000_Mixed | Cheese sandwich, American cheese, on white bread, with mayonnaise                                        | 27                 | 1.5                | D           | 4             |
| 58306100 | 8000_Mixed | Chicken enchilada, diet frozen meal                                                                      | 27                 | 3.5                | B           | 4             |
| 58125180 | 8000_Mixed | Cheese quiche, meatless                                                                                  | 27                 | 1                  | D           | 3             |
| 27235000 | 8000_Mixed | Meat loaf made with venison/deer                                                                         | 27                 | 3.5                | C           | 2             |
| 58404050 | 8000_Mixed | Chicken or turkey rice soup, reduced sodium, canned, prepared with milk                                  | 27                 | 3.5                | B           | 4             |
| 58146381 | 8000_Mixed | Pasta with cream sauce, restaurant                                                                       | 27                 | 2                  | D           | 3             |
| 58404100 | 8000_Mixed | Rice and potato soup, Puerto Rican style                                                                 | 27                 | 4                  | C           | 2             |
| 27564290 | 8000_Mixed | Frankfurter or hot dog sandwich, chicken and/or turkey, plain, on multigrain bread                       | 27                 | 2.5                | C           | 4             |
| 58303100 | 8000_Mixed | Rice, with broccoli, cheese sauce, frozen side dish                                                      | 27                 | 4                  | B           | 4             |
| 27540280 | 8000_Mixed | Chicken fillet, broiled, sandwich with cheese, on bun, with lettuce, tomato and spread                   | 27                 | 4                  | A           | 4             |
| 27242310 | 8000_Mixed | Chicken or turkey and noodles with cheese sauce                                                          | 27                 | 3.5                | B           | 1             |
| 58101320 | 8000_Mixed | Taco or tostada with meat                                                                                | 27                 | 2                  | D           | 2             |
| 58150520 | 8000_Mixed | Dukbokki or Tteokbokki, Korean                                                                           | 27                 | 3.5                | B           | 2             |
| 27564002 | 8000_Mixed | Frankfurter or hot dog sandwich, NFS, plain, on whole wheat bun                                          | 27                 | 2                  | D           | 4             |
| 27564062 | 8000_Mixed | Frankfurter or hot dog sandwich, beef, plain, on whole wheat bun                                         | 27                 | 2                  | D           | 4             |
| 27515050 | 8000_Mixed | Fajita-style beef sandwich with cheese, on pita bread, with lettuce and tomato                           | 27                 | 3.5                | B           | 2             |
| 32204010 | 8000_Mixed | Scrambled egg sandwich                                                                                   | 27                 | 3.5                | B           | 3             |

| foodcode | level1nd   | Description                                                                                                              | Food Compass Score | Health Star Rating | Nutri-Score | NOVA Category |
|----------|------------|--------------------------------------------------------------------------------------------------------------------------|--------------------|--------------------|-------------|---------------|
| 58163420 | 8000_Mixed | Spanish rice, fat not added in cooking                                                                                   | 27                 | 4                  | B           | 2             |
| 58101733 | 8000_Mixed | Taco or tostada with meat and beans, from fast food                                                                      | 27                 | 3.5                | B           | 2             |
| 27220020 | 8000_Mixed | Ham and noodles with cream or white sauce                                                                                | 27                 | 3                  | C           | 2             |
| 58402030 | 8000_Mixed | Beef rice soup, home recipe, canned or ready-to-serve                                                                    | 27                 | 4.5                | B           | 4             |
| 58101525 | 8000_Mixed | Taco or tostada with chicken and sour cream                                                                              | 27                 | 3                  | C           | 2             |
| 75414030 | 8000_Mixed | Mushrooms, batter-dipped, fried                                                                                          | 27                 | 4                  | B           | 3             |
| 27212000 | 8000_Mixed | Beef and noodles, no sauce                                                                                               | 27                 | 3.5                | B           | 3             |
| 58160470 | 8000_Mixed | Rice, white, with carrots, fat not added in cooking                                                                      | 27                 | 4                  | B           | 1             |
| 58121610 | 8000_Mixed | Dumpling, potato- or cheese-filled                                                                                       | 27                 | 3.5                | C           | 4             |
| 58106300 | 8000_Mixed | Pizza, cheese, with vegetables, from frozen, thin crust                                                                  | 27                 | 3.5                | B           | 4             |
| 75656060 | 8000_Mixed | Vegetable beef soup, chunky style                                                                                        | 26                 | 4.5                | B           | 4             |
| 27330050 | 8000_Mixed | Lamb or mutton, rice, and vegetables excluding carrots, broccoli, and dark-green leafy; gravy                            | 26                 | 3.5                | B           | 2             |
| 27510451 | 8000_Mixed | Double bacon cheeseburger, 2 medium patties, with condiments, on bun, from fast food / restaurant                        | 26                 | 2                  | D           | 3             |
| 27510465 | 8000_Mixed | Double bacon cheeseburger, 2 medium patties, with condiments, on bun, from fast food / restaurant (Wendy's Baconator)    | 26                 | 2                  | D           | 3             |
| 58402020 | 8000_Mixed | Beef dumpling soup, home recipe, canned or ready-to-serve                                                                | 26                 | 4.5                | B           | 4             |
| 27540360 | 8000_Mixed | Turkey and bacon submarine sandwich, with lettuce, tomato and spread                                                     | 26                 | 3.5                | B           | 4             |
| 58160590 | 8000_Mixed | Rice, white, with carrots and tomatoes and/or tomato-based sauce, fat not added in cooking                               | 26                 | 4                  | B           | 1             |
| 27510431 | 8000_Mixed | Double bacon cheeseburger, 2 small patties, with condiments, on bun, from fast food / restaurant (Burger King Bacon Doub | 26                 | 2                  | D           | 3             |
| 27500300 | 8000_Mixed | Wrap sandwich, filled with meat, poultry, or fish, and vegetables                                                        | 26                 | 3.5                | C           | 2             |
| 58100135 | 8000_Mixed | Burrito with meat and sour cream                                                                                         | 26                 | 2                  | D           | 2             |
| 58145170 | 8000_Mixed | Macaroni or noodles with cheese and egg                                                                                  | 26                 | 3                  | C           | 3             |
| 58160680 | 8000_Mixed | Rice, white, with carrots, dark green vegetables, and tomatoes and/or tomato-based sauce, fat not added in cooking       | 26                 | 4                  | B           | 1             |
| 27564470 | 8000_Mixed | Frankfurter or hot dog sandwich, with chili, on whole wheat bread                                                        | 26                 | 2.5                | C           | 4             |
| 27564530 | 8000_Mixed | Frankfurter or hot dog sandwich, with meatless chili, on whole wheat bread                                               | 26                 | 2.5                | C           | 4             |
| 58133110 | 8000_Mixed | Manicotti, cheese-filled, no sauce                                                                                       | 26                 | 3                  | D           | 2             |
| 14640044 | 8000_Mixed | Cheese sandwich, reduced fat Cheddar cheese, on white bread, with mayonnaise                                             | 26                 | 2                  | D           | 4             |
| 27130050 | 8000_Mixed | Lamb or mutton goulash                                                                                                   | 26                 | 4                  | B           | 3             |
| 27540130 | 8000_Mixed | Chicken barbecue sandwich                                                                                                | 26                 | 4                  | B           | 3             |
| 27564540 | 8000_Mixed | Frankfurter or hot dog sandwich, with meatless chili, on whole grain white bread                                         | 26                 | 3                  | C           | 3             |
| 58101325 | 8000_Mixed | Taco or tostada with meat and sour cream                                                                                 | 26                 | 2.5                | C           | 2             |
| 27515070 | 8000_Mixed | Steak and cheese submarine sandwich, with fried peppers and onions, on roll                                              | 26                 | 3.5                | B           | 2             |
| 58101450 | 8000_Mixed | Soft taco with chicken                                                                                                   | 26                 | 3                  | C           | 2             |
| 27510585 | 8000_Mixed | Hamburger, 1 small patty, with condiments, on white bun                                                                  | 26                 | 3.5                | C           | 3             |
| 75607050 | 8000_Mixed | Mushroom soup, cream of, low sodium, prepared with water                                                                 | 26                 | 4.5                | B           | 4             |
| 58108000 | 8000_Mixed | Calzone, with cheese, meatless                                                                                           | 26                 | 1.5                | E           | 3             |
| 58124500 | 8000_Mixed | Pastry, filled with potatoes and peas, fried                                                                             | 26                 | 2                  | D           | 2             |
| 58100100 | 8000_Mixed | Burrito with meat                                                                                                        | 26                 | 2                  | D           | 2             |
| 27540170 | 8000_Mixed | Chicken patty sandwich, miniature, with spread                                                                           | 26                 | 3                  | D           | 4             |
| 28310110 | 8000_Mixed | Beef, broth, bouillon, or consommé                                                                                       | 26                 | 3                  | C           | 4             |
| 28360100 | 8000_Mixed | Meat broth, Puerto Rican style                                                                                           | 26                 | 3                  | C           | 4             |
| 58160530 | 8000_Mixed | Rice, white, with tomatoes and/or tomato-based sauce, fat not added in cooking                                           | 26                 | 4                  | B           | 1             |
| 27118140 | 8000_Mixed | Stuffed pot roast, Puerto Rican style, NFS                                                                               | 26                 | 1.5                | D           | 2             |
| 58109210 | 8000_Mixed | Breakfast pizza with egg                                                                                                 | 26                 | 2                  | D           | 2             |
| 74203010 | 8000_Mixed | Tomatoes, NS as to form, scalloped                                                                                       | 26                 | 4                  | C           | 2             |
| 27540285 | 8000_Mixed | Chicken, bacon, and tomato club sandwich, with lettuce and spread                                                        | 26                 | 3.5                | D           | 4             |
| 58161710 | 8000_Mixed | Rice croquette                                                                                                           | 26                 | 3.5                | C           | 3             |
| 28145610 | 8000_Mixed | Turkey with gravy, dressing, potatoes, vegetable, dessert, frozen meal                                                   | 26                 | 4                  | B           | 4             |
| 27213120 | 8000_Mixed | Porcupine balls with tomato-based sauce                                                                                  | 26                 | 3.5                | C           | 1             |
| 27520135 | 8000_Mixed | Bacon, chicken, and tomato club sandwich, with cheese, lettuce and spread                                                | 26                 | 3.5                | D           | 4             |
| 27213000 | 8000_Mixed | Beef and rice, no sauce                                                                                                  | 26                 | 3.5                | B           | 2             |
| 27135150 | 8000_Mixed | Veal cordon bleu                                                                                                         | 26                 | 2                  | D           | 2             |
| 27510341 | 8000_Mixed | Bacon cheeseburger, 1 medium patty, with condiments, on white bun                                                        | 26                 | 2                  | D           | 3             |
| 58145135 | 8000_Mixed | Macaroni or noodles with cheese and meat                                                                                 | 26                 | 3.5                | C           | 3             |
| 27120030 | 8000_Mixed | Ham or pork with barbecue sauce                                                                                          | 26                 | 3.5                | D           | 2             |
| 28340110 | 8000_Mixed | Chicken or turkey broth, bouillon, or consommé                                                                           | 26                 | 3                  | C           | 4             |
| 58155110 | 8000_Mixed | Rice with chicken, Puerto Rican style                                                                                    | 26                 | 2                  | D           | 2             |
| 58100360 | 8000_Mixed | Chilaquiles, tortilla casserole with salsa, cheese, and egg                                                              | 26                 | 2.5                | C           | 2             |
| 27540190 | 8000_Mixed | Chicken patty sandwich, with lettuce and spread                                                                          | 25                 | 3                  | C           | 4             |
| 27112000 | 8000_Mixed | Beef with gravy                                                                                                          | 25                 | 4                  | B           | 2             |
| 27163010 | 8000_Mixed | Meat with gravy, NS as to type of meat,                                                                                  | 25                 | 4                  | B           | 2             |
| 58105100 | 8000_Mixed | Pupusa, cheese-filled                                                                                                    | 25                 | 2.5                | C           | 1             |
| 14640050 | 8000_Mixed | Cheese sandwich, American cheese, on white bread, with butter                                                            | 25                 | 1                  | E           | 3             |
| 27520140 | 8000_Mixed | Bacon and egg sandwich                                                                                                   | 25                 | 3.5                | C           | 3             |
| 27233000 | 8000_Mixed | Lamb or mutton and noodles with gravy                                                                                    | 25                 | 3.5                | B           | 1             |
| 27540110 | 8000_Mixed | Chicken sandwich, with spread                                                                                            | 25                 | 4                  | B           | 4             |
| 27515010 | 8000_Mixed | Steak sandwich, plain, on roll                                                                                           | 25                 | 4                  | B           | 3             |
| 27135010 | 8000_Mixed | Veal with gravy                                                                                                          | 25                 | 4                  | B           | 2             |
| 32202034 | 8000_Mixed | Egg, cheese, and sausage on bun                                                                                          | 25                 | 2                  | D           | 3             |
| 27510446 | 8000_Mixed | Double bacon cheeseburger, 2 medium patties, plain, on bun, from fast food / restaurant                                  | 25                 | 2                  | D           | 3             |
| 27510521 | 8000_Mixed | Hamburger, NFS                                                                                                           | 25                 | 3.5                | C           | 3             |
| 27510641 | 8000_Mixed | Hamburger, 1 medium patty, with condiments, on white bun                                                                 | 25                 | 3.5                | C           | 3             |
| 58146442 | 8000_Mixed | Pasta with cream sauce and seafood, home recipe                                                                          | 25                 | 3                  | B           | 3             |
| 27564480 | 8000_Mixed | Frankfurter or hot dog sandwich, with chili, on whole grain white bread                                                  | 25                 | 2.5                | C           | 4             |
| 27317010 | 8000_Mixed | Beef pot pie                                                                                                             | 25                 | 3                  | C           | 3             |
| 27564030 | 8000_Mixed | Frankfurter or hot dog sandwich, NFS, plain, on whole wheat bread                                                        | 25                 | 2                  | D           | 4             |
| 27564090 | 8000_Mixed | Frankfurter or hot dog sandwich, beef, plain, on whole wheat bread                                                       | 25                 | 2                  | D           | 4             |
| 58402010 | 8000_Mixed | Beef noodle soup, canned or ready-to-serve                                                                               | 25                 | 4                  | B           | 4             |
| 73304010 | 8000_Mixed | Squash fritter or cake                                                                                                   | 25                 | 3                  | C           | 3             |
| 27116350 | 8000_Mixed | Stewed seasoned ground beef, Mexican style                                                                               | 25                 | 3.5                | C           | 1             |
| 27345440 | 8000_Mixed | Chicken or turkey, rice, and vegetables including carrots, broccoli, and/or dark-green leafy; cheese sauce               | 25                 | 3.5                | B           | 1             |
| 58122320 | 8000_Mixed | Knish, cheese                                                                                                            | 25                 | 2                  | D           | 3             |
| 58107100 | 8000_Mixed | Pizza, no cheese, thick crust                                                                                            | 25                 | 3                  | C           | 2             |
| 58105105 | 8000_Mixed | Pupusa, bean-filled                                                                                                      | 25                 | 3.5                | A           | 2             |
| 58131590 | 8000_Mixed | Ravioli, cheese and spinach-filled, no sauce                                                                             | 25                 | 3                  | C           | 2             |
| 58162310 | 8000_Mixed | Rice pilaf                                                                                                               | 25                 | 3                  | C           | 3             |
| 14640100 | 8000_Mixed | Grilled cheese sandwich, NFS                                                                                             | 25                 | 1                  | E           | 3             |
| 14640105 | 8000_Mixed | Grilled cheese sandwich, American cheese, on white bread                                                                 | 25                 | 1                  | E           | 3             |
| 58134110 | 8000_Mixed | Stuffed shells, cheese-filled, no sauce                                                                                  | 25                 | 3                  | C           | 2             |
| 27541001 | 8000_Mixed | Turkey, ham, and roast beef club sandwich with cheese, lettuce, tomato, and spread                                       | 25                 | 4                  | A           | 4             |
| 58165000 | 8000_Mixed | Rice, white, with vegetables, cheese and/or cream based sauce, NS as to fat added in cooking                             | 25                 | 3.5                | B           | 2             |
| 58165020 | 8000_Mixed | Rice, white, with vegetables, cheese and/or cream based sauce, fat added in cooking                                      | 25                 | 3.5                | B           | 2             |
| 14640062 | 8000_Mixed | Cheese sandwich, reduced fat American cheese, on white bread, with butter                                                | 25                 | 1.5                | D           | 3             |
| 28110660 | 8000_Mixed | Meatballs, Swedish, in gravy, with noodles, diet frozen meal                                                             | 25                 | 4                  | A           | 4             |
| 58145110 | 8000_Mixed | Macaroni or noodles with cheese                                                                                          | 25                 | 3                  | C           | 3             |
| 28140150 | 8000_Mixed | Chicken divan, frozen meal                                                                                               | 25                 | 3.5                | B           | 4             |
| 58127500 | 8000_Mixed | Vegetable submarine sandwich, with fat free spread                                                                       | 25                 | 4                  | B           | 3             |
| 58164210 | 8000_Mixed | Rice dessert or salad with fruit                                                                                         | 25                 | 3.5                | C           | 3             |
| 27510676 | 8000_Mixed | Double hamburger, 2 medium patties, with condiments, on bun, from fast food / restaurant                                 | 25                 | 3.5                | C           | 4             |
| 27510681 | 8000_Mixed | Double hamburger, 2 medium patties, with condiments, on bun, from fast food / restaurant (Burger King Double WHOPPER     | 25                 | 3.5                | C           | 4             |
| 27510682 | 8000_Mixed | Double hamburger, 2 medium patties, with condiments, on bun, from fast food / restaurant (Wendy's 1/2 lb Double)         | 25                 | 3.5                | C           | 4             |
| 27564040 | 8000_Mixed | Frankfurter or hot dog sandwich, NFS, plain, on whole grain white bread                                                  | 25                 | 2                  | D           | 4             |
| 27564100 | 8000_Mixed | Frankfurter or hot dog sandwich, beef, plain, on whole grain white bread                                                 | 25                 | 2                  | D           | 4             |

| foodcode | level1nd   | Description                                                                                                              | Food Compass Score | Health Star Rating | Nutri-Score | NOVA Category |
|----------|------------|--------------------------------------------------------------------------------------------------------------------------|--------------------|--------------------|-------------|---------------|
| 58107232 | 8000_Mixed | White pizza, cheese, with meat and vegetables, thin crust                                                                | 25                 | 2                  | D           | 3             |
| 27130010 | 8000_Mixed | Lamb or mutton with gravy                                                                                                | 25                 | 3.5                | D           | 1             |
| 58301030 | 8000_Mixed | Veal lasagna, diet frozen meal                                                                                           | 25                 | 4                  | B           | 4             |
| 58161200 | 8000_Mixed | Rice, cooked with coconut milk                                                                                           | 25                 | 1.5                | D           | 2             |
| 27510205 | 8000_Mixed | Cheeseburger, 1 small patty, with condiments, on white bun                                                               | 25                 | 3                  | C           | 3             |
| 58101345 | 8000_Mixed | Soft taco with meat                                                                                                      | 24                 | 2.5                | D           | 2             |
| 27115100 | 8000_Mixed | Steak teriyaki                                                                                                           | 24                 | 3.5                | C           | 2             |
| 58116130 | 8000_Mixed | Empanada, Mexican turnover, filled with chicken and vegetables                                                           | 24                 | 3                  | C           | 2             |
| 14640020 | 8000_Mixed | Cheese sandwich, reduced fat Cheddar cheese, on white bread, no spread                                                   | 24                 | 2                  | D           | 2             |
| 27220030 | 8000_Mixed | Ham and rice with mushroom sauce                                                                                         | 24                 | 3                  | C           | 2             |
| 27564170 | 8000_Mixed | Frankfurter or hot dog sandwich, beef and pork, plain, on multigrain bread                                               | 24                 | 2                  | D           | 4             |
| 58131330 | 8000_Mixed | Ravioli, meat-filled, with cream sauce                                                                                   | 24                 | 3                  | C           | 2             |
| 58101460 | 8000_Mixed | Soft taco with chicken and sour cream                                                                                    | 24                 | 3                  | C           | 2             |
| 27213200 | 8000_Mixed | Beef and rice with gravy                                                                                                 | 24                 | 3.5                | B           | 2             |
| 14640155 | 8000_Mixed | Grilled cheese sandwich, reduced fat American cheese, on white bread                                                     | 24                 | 1.5                | D           | 3             |
| 75604020 | 8000_Mixed | Corn soup, cream of, prepared with water                                                                                 | 24                 | 4                  | B           | 2             |
| 28340640 | 8000_Mixed | Chicken or turkey vegetable soup with noodles, stew type, chunky style, canned or ready-to-serve                         | 24                 | 4.5                | B           | 4             |
| 58303200 | 8000_Mixed | Rice, with green beans, water chestnuts, in sherry mushroom sauce, frozen side dish                                      | 24                 | 4                  | B           | 4             |
| 27515000 | 8000_Mixed | Steak submarine sandwich with lettuce and tomato                                                                         | 24                 | 4                  | B           | 3             |
| 14640068 | 8000_Mixed | Cheese sandwich, reduced fat Cheddar cheese, on white bread, with butter                                                 | 24                 | 1.5                | D           | 3             |
| 27500200 | 8000_Mixed | Wrap sandwich, filled with meat, poultry, or fish, vegetables, and cheese                                                | 24                 | 3                  | D           | 3             |
| 27510281 | 8000_Mixed | Bacon cheeseburger, 1 small patty, with condiments, on bun, from fast food / restaurant (Wendy's Jr. Bacon Cheeseburger) | 24                 | 2                  | D           | 3             |
| 58134640 | 8000_Mixed | Tortellini, cheese-filled, meatless, with vinaigrette dressing                                                           | 24                 | 2.5                | D           | 2             |
| 28340610 | 8000_Mixed | Chicken or turkey vegetable soup, stew type                                                                              | 24                 | 4.5                | B           | 4             |
| 58306070 | 8000_Mixed | Cheese enchilada, frozen meal                                                                                            | 24                 | 3.5                | C           | 4             |
| 27564550 | 8000_Mixed | Frankfurter or hot dog sandwich, with meatless chili, on multigrain bread                                                | 24                 | 2.5                | C           | 4             |
| 58160500 | 8000_Mixed | Rice, white, with peas and carrots, fat not added in cooking                                                             | 24                 | 4                  | B           | 1             |
| 27220190 | 8000_Mixed | Sausage and noodles with cream or white sauce                                                                            | 24                 | 3                  | C           | 3             |
| 58134650 | 8000_Mixed | Tortellini, meat-filled, no sauce                                                                                        | 24                 | 3.5                | C           | 2             |
| 58151210 | 8000_Mixed | Sushi roll, shrimp                                                                                                       | 24                 | 3.5                | B           | 2             |
| 27510155 | 8000_Mixed | Cheeseburger, NFS                                                                                                        | 24                 | 3                  | D           | 3             |
| 27510251 | 8000_Mixed | Cheeseburger, 1 medium patty, with condiments, on white bun                                                              | 24                 | 3                  | D           | 3             |
| 58104740 | 8000_Mixed | Quesadilla with chicken                                                                                                  | 24                 | 1.5                | D           | 2             |
| 27540200 | 8000_Mixed | Fajita-style chicken sandwich with cheese, on pita bread, with lettuce and tomato                                        | 24                 | 3.5                | C           | 3             |
| 27564230 | 8000_Mixed | Frankfurter or hot dog sandwich, meat and poultry, plain, on multigrain bread                                            | 24                 | 2                  | D           | 4             |
| 58104770 | 8000_Mixed | Quesadilla with vegetables and chicken                                                                                   | 24                 | 2                  | D           | 2             |
| 32202040 | 8000_Mixed | Egg, cheese, and beef on English Muffin                                                                                  | 24                 | 2                  | D           | 3             |
| 27520340 | 8000_Mixed | Ham salad sandwich                                                                                                       | 24                 | 3                  | C           | 4             |
| 58104760 | 8000_Mixed | Quesadilla with vegetables and meat                                                                                      | 24                 | 2                  | D           | 2             |
| 58106358 | 8000_Mixed | Pizza, cheese, with fruit, thin crust                                                                                    | 24                 | 2                  | D           | 4             |
| 14640185 | 8000_Mixed | Grilled cheese sandwich, reduced fat Cheddar cheese, on white bread                                                      | 24                 | 1.5                | D           | 3             |
| 58101350 | 8000_Mixed | Soft taco with meat and sour cream                                                                                       | 24                 | 3                  | C           | 3             |
| 27345450 | 8000_Mixed | Chicken or turkey, rice, and vegetables excluding carrots, broccoli, and dark-green leafy; cheese sauce                  | 23                 | 3.5                | B           | 1             |
| 58103310 | 8000_Mixed | Tamale casserole with meat                                                                                               | 23                 | 3.5                | B           | 1             |
| 27212050 | 8000_Mixed | Beef and macaroni with cheese sauce                                                                                      | 23                 | 3.5                | B           | 2             |
| 58304050 | 8000_Mixed | Spaghetti with meat and mushroom sauce, diet frozen meal                                                                 | 23                 | 4                  | B           | 4             |
| 58104730 | 8000_Mixed | Quesadilla with meat                                                                                                     | 23                 | 1.5                | D           | 2             |
| 58146432 | 8000_Mixed | Pasta with cream sauce, poultry, and added vegetables, home recipe                                                       | 23                 | 3                  | B           | 2             |
| 58107222 | 8000_Mixed | White pizza, cheese, with meat, thin crust                                                                               | 23                 | 2                  | D           | 3             |
| 58116120 | 8000_Mixed | Empanada, Mexican turnover, filled with meat and vegetables                                                              | 23                 | 2.5                | D           | 1             |
| 58128000 | 8000_Mixed | Biscuit with gravy                                                                                                       | 23                 | 3                  | C           | 3             |
| 58100000 | 8000_Mixed | Burrito, taco, or quesadilla with egg                                                                                    | 23                 | 3                  | D           | 3             |
| 27515030 | 8000_Mixed | Steak and cheese sandwich, plain, on roll                                                                                | 23                 | 3                  | D           | 3             |
| 27213420 | 8000_Mixed | Porcupine balls with mushroom sauce                                                                                      | 23                 | 3                  | C           | 1             |
| 27116200 | 8000_Mixed | Beef with barbecue sauce                                                                                                 | 23                 | 3.5                | C           | 2             |
| 28130000 | 8000_Mixed | Veal dinner, NFS, frozen meal                                                                                            | 23                 | 4                  | B           | 4             |
| 28133110 | 8000_Mixed | Veal, breaded, with spaghetti, in tomato sauce, frozen meal                                                              | 23                 | 4                  | B           | 4             |
| 58106250 | 8000_Mixed | Pizza, extra cheese, thin crust                                                                                          | 23                 | 2                  | D           | 4             |
| 27564490 | 8000_Mixed | Frankfurter or hot dog sandwich, with chili, on multigrain bread                                                         | 23                 | 2.5                | C           | 4             |
| 58100010 | 8000_Mixed | Burrito, taco, or quesadilla with egg and breakfast meat                                                                 | 23                 | 2                  | D           | 3             |
| 58104535 | 8000_Mixed | Chimichanga with meat and sour cream                                                                                     | 23                 | 2                  | D           | 2             |
| 41602050 | 8000_Mixed | Split pea soup                                                                                                           | 23                 | 4.5                | A           | 4             |
| 58140110 | 8000_Mixed | Spaghetti with corned beef, Puerto Rican style                                                                           | 23                 | 3.5                | C           | 4             |
| 27520150 | 8000_Mixed | Bacon, lettuce, and tomato sandwich with spread                                                                          | 23                 | 3.5                | C           | 4             |
| 28113140 | 8000_Mixed | Beef with spaetzle or rice, vegetable, frozen meal                                                                       | 23                 | 3.5                | B           | 4             |
| 58104835 | 8000_Mixed | Taquito or flauta with chicken and cheese                                                                                | 23                 | 3.5                | B           | 4             |
| 27520330 | 8000_Mixed | Ham and egg sandwich                                                                                                     | 23                 | 3.5                | C           | 3             |
| 27520520 | 8000_Mixed | Pork sandwich                                                                                                            | 23                 | 4                  | B           | 3             |
| 32202130 | 8000_Mixed | Egg and steak on biscuit                                                                                                 | 23                 | 2                  | D           | 3             |
| 27510312 | 8000_Mixed | Bacon cheeseburger, 1 medium patty, with condiments, on bun, from fast food / restaurant                                 | 23                 | 1.5                | D           | 3             |
| 27540290 | 8000_Mixed | Chicken submarine sandwich, with lettuce, tomato and spread                                                              | 23                 | 4                  | A           | 4             |
| 58201015 | 8000_Mixed | Jelly sandwich, regular jelly, on wheat bread                                                                            | 23                 | 3                  | C           | 4             |
| 58201025 | 8000_Mixed | Jelly sandwich, regular jelly, on whole wheat bread                                                                      | 23                 | 3                  | C           | 4             |
| 27230010 | 8000_Mixed | Lamb or mutton loaf                                                                                                      | 23                 | 3                  | D           | 2             |
| 27540291 | 8000_Mixed | Chicken submarine sandwich, with cheese, lettuce, tomato and spread                                                      | 23                 | 4                  | A           | 4             |
| 58106220 | 8000_Mixed | Pizza, cheese, from restaurant or fast food, thin crust                                                                  | 23                 | 2                  | D           | 4             |
| 58104830 | 8000_Mixed | Taquito or flauta with chicken                                                                                           | 23                 | 3.5                | B           | 4             |
| 58155810 | 8000_Mixed | Stewed rice, Puerto Rican style                                                                                          | 23                 | 2.5                | C           | 2             |
| 14640056 | 8000_Mixed | Cheese sandwich, Cheddar cheese, on white bread, with butter                                                             | 23                 | 1.5                | E           | 3             |
| 58131535 | 8000_Mixed | Ravioli, cheese-filled, with cream sauce                                                                                 | 23                 | 3                  | C           | 2             |
| 58106750 | 8000_Mixed | Pizza with meat and fruit, thin crust                                                                                    | 23                 | 2                  | D           | 4             |
| 14640032 | 8000_Mixed | Cheese sandwich, Cheddar cheese, on white bread, with mayonnaise                                                         | 23                 | 1.5                | D           | 4             |
| 58106360 | 8000_Mixed | Pizza, cheese, with fruit, thick crust                                                                                   | 23                 | 3                  | C           | 4             |
| 27113300 | 8000_Mixed | Swedish meatballs with cream or white sauce                                                                              | 22                 | 3                  | D           | 2             |
| 27510631 | 8000_Mixed | Hamburger, 1 medium patty, plain, on white bun                                                                           | 22                 | 3.5                | D           | 2             |
| 58126310 | 8000_Mixed | Turnover, chicken, with gravy                                                                                            | 22                 | 3                  | D           | 2             |
| 58100325 | 8000_Mixed | Burrito with beans, meatless, from fast food                                                                             | 22                 | 4                  | B           | 4             |
| 28143200 | 8000_Mixed | Chicken in soy-based sauce, rice and vegetables, frozen meal                                                             | 22                 | 4                  | A           | 4             |
| 27520380 | 8000_Mixed | Ham and cheese on English muffin                                                                                         | 22                 | 1.5                | D           | 3             |
| 58145112 | 8000_Mixed | Macaroni or noodles with cheese, made from packaged mix                                                                  | 22                 | 3                  | C           | 3             |
| 14640008 | 8000_Mixed | Cheese sandwich, Cheddar cheese, on white bread, no spread                                                               | 22                 | 1.5                | D           | 3             |
| 14640125 | 8000_Mixed | Grilled cheese sandwich, Cheddar cheese, on white bread                                                                  | 22                 | 1.5                | E           | 3             |
| 58131530 | 8000_Mixed | Ravioli, cheese-filled, with meat sauce                                                                                  | 22                 | 3                  | C           | 2             |
| 27513040 | 8000_Mixed | Roast beef submarine sandwich, with lettuce, tomato and spread                                                           | 22                 | 3.5                | B           | 4             |
| 14620320 | 8000_Mixed | Topping from meat pizza                                                                                                  | 22                 | 1                  | E           | 4             |
| 27510575 | 8000_Mixed | Hamburger, 1 small patty, plain, on white bun                                                                            | 22                 | 3.5                | C           | 2             |
| 27510615 | 8000_Mixed | Hamburger, 1 medium patty, with condiments, on bun, from fast food / restaurant (Burger King WHOPPER)                    | 22                 | 3.5                | B           | 4             |
| 27510616 | 8000_Mixed | Hamburger, 1 medium patty, with condiments, on bun, from fast food / restaurant (Wendy's 1/4 lb Single)                  | 22                 | 3.5                | B           | 4             |
| 58106560 | 8000_Mixed | Pizza with pepperoni, from restaurant or fast food, thick crust                                                          | 22                 | 2                  | D           | 4             |
| 27416200 | 8000_Mixed | Beef, ground, with egg and onion                                                                                         | 22                 | 2                  | D           | 1             |
| 28340690 | 8000_Mixed | Chicken or turkey vegetable soup with potato and cheese, chunky style, canned or ready-to-serve                          | 22                 | 4                  | C           | 4             |
| 27515040 | 8000_Mixed | Steak and cheese submarine sandwich, plain, on roll                                                                      | 22                 | 3.5                | D           | 3             |

| foodcode | level1nd   | Description                                                                                      | Food Compass Score | Health Star Rating | Nutri-Score | NOVA Category |
|----------|------------|--------------------------------------------------------------------------------------------------|--------------------|--------------------|-------------|---------------|
| 58164110 | 8000_Mixed | Rice with raisins                                                                                | 22                 | 3                  | C           | 3             |
| 58401010 | 8000_Mixed | Barley soup, home recipe, canned, or ready-to-serve                                              | 22                 | 4                  | B           | 4             |
| 27515080 | 8000_Mixed | Steak sandwich, plain, on biscuit                                                                | 22                 | 3                  | C           | 3             |
| 28144100 | 8000_Mixed | Chicken and vegetable entree with noodles and cream sauce, frozen meal                           | 22                 | 3.5                | B           | 4             |
| 58104750 | 8000_Mixed | Quesadilla with vegetables                                                                       | 22                 | 2                  | D           | 3             |
| 58104720 | 8000_Mixed | Quesadilla, just cheese, from fast food                                                          | 22                 | 1.5                | D           | 3             |
| 27243700 | 8000_Mixed | Chicken in cheese sauce with Spanish rice                                                        | 22                 | 3.5                | C           | 2             |
| 27510261 | 8000_Mixed | Cheeseburger, 1 large patty, plain, on bun, from fast food / restaurant                          | 22                 | 2                  | D           | 3             |
| 27315330 | 8000_Mixed | Beef, rice, and vegetables including carrots, broccoli, and/or dark-green leafy; cheese sauce    | 22                 | 3.5                | B           | 2             |
| 58106606 | 8000_Mixed | Pizza with meat other than pepperoni, from frozen, thick crust                                   | 22                 | 2.5                | D           | 4             |
| 58106760 | 8000_Mixed | Pizza with meat and fruit, thick crust                                                           | 22                 | 3                  | C           | 4             |
| 58145119 | 8000_Mixed | Macaroni or noodles with cheese, made from reduced fat packaged mix                              | 22                 | 3.5                | B           | 3             |
| 58106230 | 8000_Mixed | Pizza, cheese, from restaurant or fast food, thick crust                                         | 22                 | 2.5                | C           | 4             |
| 27540361 | 8000_Mixed | Turkey and bacon submarine sandwich, with cheese, lettuce, tomato and spread                     | 22                 | 3.5                | C           | 4             |
| 58304060 | 8000_Mixed | Spaghetti with meat sauce, diet frozen meal                                                      | 22                 | 4                  | B           | 4             |
| 27220120 | 8000_Mixed | Sausage and rice with tomato-based sauce                                                         | 22                 | 3                  | C           | 3             |
| 58100370 | 8000_Mixed | Chilaquiles, tortilla casserole with salsa and cheese, no egg                                    | 22                 | 2.5                | C           | 3             |
| 27513050 | 8000_Mixed | Roast beef sandwich with cheese                                                                  | 22                 | 1.5                | D           | 3             |
| 58108010 | 8000_Mixed | Calzone, with meat and cheese                                                                    | 22                 | 2                  | D           | 3             |
| 58106305 | 8000_Mixed | Pizza, cheese with vegetables, from frozen, thick crust                                          | 22                 | 3                  | C           | 4             |
| 58304010 | 8000_Mixed | Spaghetti and meatballs dinner, NFS, frozen meal                                                 | 22                 | 4                  | B           | 4             |
| 58126140 | 8000_Mixed | Turnover, meat- and bean-filled, no gravy                                                        | 22                 | 2                  | D           | 3             |
| 27510331 | 8000_Mixed | Bacon cheeseburger, 1 medium patty, plain, on white bun                                          | 22                 | 2                  | D           | 3             |
| 28110350 | 8000_Mixed | Salisbury steak with gravy, potatoes, vegetable, dessert, frozen meal                            | 21                 | 3.5                | B           | 4             |
| 27513020 | 8000_Mixed | Roast beef sandwich, with gravy                                                                  | 21                 | 3                  | C           | 2             |
| 27520120 | 8000_Mixed | Bacon and cheese sandwich, with spread                                                           | 21                 | 1.5                | E           | 4             |
| 58164530 | 8000_Mixed | Rice, white, with gravy, NS as to fat added in cooking                                           | 21                 | 3                  | C           | 2             |
| 58164550 | 8000_Mixed | Rice, white, with gravy, fat added in cooking                                                    | 21                 | 3                  | C           | 2             |
| 27513070 | 8000_Mixed | Roast beef submarine sandwich, on roll, au jus                                                   | 21                 | 3.5                | C           | 2             |
| 75607040 | 8000_Mixed | Mushroom soup, with meat broth, prepared with water                                              | 21                 | 4                  | C           | 4             |
| 27213300 | 8000_Mixed | Beef and rice with cream sauce                                                                   | 21                 | 3.5                | B           | 2             |
| 58112510 | 8000_Mixed | Dumpling, steamed, filled with meat, poultry, or seafood                                         | 21                 | 3.5                | B           | 4             |
| 58146412 | 8000_Mixed | Pasta with cream sauce, meat, and added vegetables, home recipe                                  | 21                 | 3.5                | B           | 2             |
| 58150510 | 8000_Mixed | Rice, fried, with shrimp                                                                         | 21                 | 3.5                | B           | 1             |
| 27160010 | 8000_Mixed | Meat with barbecue sauce, NS as to type of meat                                                  | 21                 | 3.5                | C           | 2             |
| 58106702 | 8000_Mixed | Pizza with meat and vegetables, from frozen, medium crust                                        | 21                 | 2                  | D           | 4             |
| 58106700 | 8000_Mixed | Pizza with meat and vegetables, from frozen, thin crust                                          | 21                 | 2                  | D           | 4             |
| 58104825 | 8000_Mixed | Taquito or flauta with meat and cheese                                                           | 21                 | 3                  | B           | 4             |
| 27560705 | 8000_Mixed | Sausage balls, made with biscuit mix and cheese                                                  | 21                 | 0.5                | E           | 3             |
| 27320020 | 8000_Mixed | Ham pot pie                                                                                      | 21                 | 3                  | C           | 3             |
| 58126290 | 8000_Mixed | Turnover, meat- and cheese-filled, lower in fat                                                  | 21                 | 3.5                | B           | 4             |
| 58106604 | 8000_Mixed | Pizza with meat other than pepperoni, from frozen, medium crust                                  | 21                 | 2.5                | C           | 4             |
| 27540140 | 8000_Mixed | Chicken fillet, breaded, fried, sandwich                                                         | 21                 | 2                  | D           | 4             |
| 27510305 | 8000_Mixed | Bacon cheeseburger, 1 medium patty, plain, on bun, from fast food / restaurant                   | 21                 | 1.5                | D           | 3             |
| 58106205 | 8000_Mixed | Pizza, cheese, from frozen, thick crust                                                          | 21                 | 2.5                | C           | 4             |
| 58104820 | 8000_Mixed | Taquito or flauta with meat                                                                      | 21                 | 3                  | B           | 4             |
| 58101800 | 8000_Mixed | Ground beef with tomato sauce and taco seasonings on a cornbread crust                           | 21                 | 3                  | C           | 2             |
| 58106516 | 8000_Mixed | Pizza with pepperoni, from frozen, thick crust                                                   | 21                 | 2.5                | D           | 4             |
| 58126180 | 8000_Mixed | Turnover, meat-, potato-, and vegetable-filled, no gravy                                         | 21                 | 3                  | C           | 3             |
| 74602050 | 8000_Mixed | Tomato soup, instant type, prepared with water                                                   | 21                 | 4                  | C           | 4             |
| 27510241 | 8000_Mixed | Cheeseburger, 1 medium patty, plain, on white bun                                                | 21                 | 2                  | D           | 3             |
| 58126170 | 8000_Mixed | Turnover filled with meat and vegetable, no potatoes, no gravy                                   | 21                 | 3                  | C           | 3             |
| 58106602 | 8000_Mixed | Pizza with meat other than pepperoni, from frozen, thin crust                                    | 21                 | 2.5                | D           | 4             |
| 58126410 | 8000_Mixed | Turnover, filled with egg, meat, and cheese, lower in fat                                        | 21                 | 3.5                | B           | 4             |
| 58106540 | 8000_Mixed | Pizza with pepperoni, from restaurant or fast food, NS as to type of crust                       | 21                 | 2                  | D           | 4             |
| 58106555 | 8000_Mixed | Pizza with pepperoni, from restaurant or fast food, medium crust                                 | 21                 | 2                  | D           | 4             |
| 58156310 | 8000_Mixed | Rice with Spanish sausage, Puerto Rican style                                                    | 21                 | 1.5                | D           | 2             |
| 58404510 | 8000_Mixed | Chicken or turkey soup with dumplings and potatoes, home recipe, canned, or ready-to-serve       | 21                 | 3.5                | B           | 4             |
| 58404520 | 8000_Mixed | Chicken or turkey soup with dumplings, home recipe, canned or ready-to-serve                     | 21                 | 3.5                | B           | 4             |
| 28160300 | 8000_Mixed | Meat loaf dinner, NFS, frozen meal                                                               | 21                 | 4                  | B           | 4             |
| 28160310 | 8000_Mixed | Meat loaf with potatoes, vegetable, frozen meal                                                  | 21                 | 4                  | B           | 4             |
| 28340510 | 8000_Mixed | Chicken or turkey noodle soup, chunky style, canned or ready-to-serve                            | 21                 | 3.5                | B           | 4             |
| 32202000 | 8000_Mixed | Egg, cheese, ham, and bacon on bun                                                               | 21                 | 1.5                | D           | 3             |
| 58160410 | 8000_Mixed | Rice, white, with corn, fat not added in cooking                                                 | 21                 | 4                  | B           | 1             |
| 58105110 | 8000_Mixed | Pupusa, meat-filled                                                                              | 21                 | 3.5                | B           | 1             |
| 58146392 | 8000_Mixed | Pasta with cream sauce and added vegetables, from home recipe                                    | 21                 | 3                  | C           | 2             |
| 28110390 | 8000_Mixed | Salisbury steak, potatoes, vegetable, dessert, diet frozen meal                                  | 21                 | 4.5                | B           | 4             |
| 27513060 | 8000_Mixed | Roast beef sandwich with bacon and cheese sauce                                                  | 20                 | 1.5                | D           | 3             |
| 58134620 | 8000_Mixed | Tortellini, cheese-filled, meatless, with tomato sauce                                           | 20                 | 4                  | B           | 4             |
| 27510475 | 8000_Mixed | Double bacon cheeseburger, 2 large patties, with condiments, on bun, from fast food / restaurant | 20                 | 1.5                | D           | 3             |
| 58104710 | 8000_Mixed | Quesadilla, just cheese, meatless                                                                | 20                 | 3                  | C           | 3             |
| 28145710 | 8000_Mixed | Turkey tetrazzini, frozen meal                                                                   | 20                 | 3.5                | B           | 4             |
| 27520390 | 8000_Mixed | Ham and cheese submarine sandwich, with lettuce, tomato and spread                               | 20                 | 3.5                | A           | 4             |
| 27510195 | 8000_Mixed | Cheeseburger, 1 small patty, plain, on white bun                                                 | 20                 | 2                  | D           | 3             |
| 27564050 | 8000_Mixed | Frankfurter or hot dog sandwich, NFS, plain, on multigrain bread                                 | 20                 | 2                  | D           | 4             |
| 27564110 | 8000_Mixed | Frankfurter or hot dog sandwich, beef, plain, on multigrain bread                                | 20                 | 2                  | D           | 4             |
| 58106630 | 8000_Mixed | Pizza with meat other than pepperoni, from restaurant or fast food, thick crust                  | 20                 | 2                  | D           | 4             |
| 27560000 | 8000_Mixed | Luncheon meat sandwich, NFS, with spread                                                         | 20                 | 3.5                | A           | 4             |
| 27520360 | 8000_Mixed | Ham and cheese sandwich, on bun, with lettuce and spread                                         | 20                 | 2                  | D           | 4             |
| 58134613 | 8000_Mixed | Tortellini, meat-filled, with tomato sauce, canned                                               | 20                 | 4                  | B           | 4             |
| 28143040 | 8000_Mixed | Chicken chow mein with rice, diet frozen meal                                                    | 20                 | 4                  | B           | 4             |
| 58163510 | 8000_Mixed | Rice dressing                                                                                    | 20                 | 3                  | C           | 3             |
| 58106514 | 8000_Mixed | Pizza with pepperoni, from frozen, medium crust                                                  | 20                 | 2                  | D           | 4             |
| 27315340 | 8000_Mixed | Beef, rice, and vegetables excluding carrots, broccoli, and dark-green leafy; cheese sauce       | 20                 | 3.5                | B           | 2             |
| 28355420 | 8000_Mixed | Shrimp soup, cream of, prepared with milk                                                        | 20                 | 3                  | C           | 4             |
| 58131100 | 8000_Mixed | Ravioli, NS as to filling, no sauce                                                              | 20                 | 3.5                | C           | 2             |
| 58164560 | 8000_Mixed | Rice, white, with soy-based sauce, NS as to fat added in cooking                                 | 20                 | 3                  | C           | 2             |
| 58164580 | 8000_Mixed | Rice, white, with soy-based sauce, fat added in cooking                                          | 20                 | 3                  | C           | 2             |
| 27510276 | 8000_Mixed | Bacon cheeseburger, 1 small patty, with condiments, on bun, from fast food / restaurant          | 20                 | 2                  | D           | 3             |
| 58103120 | 8000_Mixed | Tamale with meat                                                                                 | 20                 | 3                  | B           | 1             |
| 28355410 | 8000_Mixed | Shrimp soup, cream of, NS as to prepared with milk or water                                      | 20                 | 3                  | C           | 4             |
| 58104800 | 8000_Mixed | Taquito or flauta with cheese                                                                    | 20                 | 3.5                | B           | 3             |
| 58109060 | 8000_Mixed | Pizza, cheese and vegetables, whole wheat thick crust                                            | 20                 | 3.5                | A           | 4             |
| 27520155 | 8000_Mixed | Bacon, lettuce, and tomato submarine sandwich, with spread                                       | 20                 | 4                  | A           | 4             |
| 75411020 | 8000_Mixed | Corn fritter                                                                                     | 20                 | 2                  | D           | 3             |
| 58160710 | 8000_Mixed | Rice, white, with other vegetables, fat not added in cooking                                     | 20                 | 3.5                | B           | 1             |
| 27540111 | 8000_Mixed | Chicken sandwich, with cheese and spread                                                         | 20                 | 3.5                | C           | 4             |
| 58106200 | 8000_Mixed | Pizza, cheese, from frozen, thin crust                                                           | 20                 | 2.5                | C           | 4             |
| 58106359 | 8000_Mixed | Pizza, cheese, with fruit, medium crust                                                          | 20                 | 3.5                | C           | 4             |
| 58106512 | 8000_Mixed | Pizza with pepperoni, from frozen, thin crust                                                    | 20                 | 2.5                | C           | 4             |
| 75649050 | 8000_Mixed | Vegetable soup, made from dry mix                                                                | 20                 | 3                  | C           | 4             |
| 58145160 | 8000_Mixed | Macaroni or noodles with cheese and frankfurters or hot dogs                                     | 20                 | 2.5                | C           | 3             |

| foodcode | level1nd   | Description                                                                                                     | Food Compass Score | Health Star Rating | Nutri-Score | NOVA Category |
|----------|------------|-----------------------------------------------------------------------------------------------------------------|--------------------|--------------------|-------------|---------------|
| 27540350 | 8000_Mixed | Turkey submarine sandwich, with cheese, lettuce, tomato and spread                                              | 20                 | 4                  | A           | 4             |
| 58175320 | 8000_Mixed | Congee, with vegetables                                                                                         | 20                 | 4                  | B           | 1             |
| 58106633 | 8000_Mixed | Pizza, with meat other than pepperoni, stuffed crust                                                            | 20                 | 2                  | D           | 4             |
| 58107205 | 8000_Mixed | White pizza, cheese, thin crust                                                                                 | 19                 | 2                  | D           | 4             |
| 58128250 | 8000_Mixed | Dressing with meat and vegetables                                                                               | 19                 | 2                  | D           | 3             |
| 58304300 | 8000_Mixed | Cannelloni, cheese-filled, with tomato sauce, diet frozen meal                                                  | 19                 | 3                  | C           | 4             |
| 58146422 | 8000_Mixed | Pasta with cream sauce and poultry, home recipe                                                                 | 19                 | 3.5                | B           | 2             |
| 32201000 | 8000_Mixed | Fried egg sandwich                                                                                              | 19                 | 3.5                | B           | 3             |
| 58126000 | 8000_Mixed | Turnover filled with ground beef and cabbage                                                                    | 19                 | 3.5                | A           | 3             |
| 58306010 | 8000_Mixed | Beef enchilada dinner, NFS, frozen meal                                                                         | 19                 | 4                  | B           | 4             |
| 27160100 | 8000_Mixed | Meatballs, NS as to type of meat, with sauce                                                                    | 19                 | 2                  | D           | 1             |
| 58106755 | 8000_Mixed | Pizza with meat and fruit, medium crust                                                                         | 19                 | 3                  | C           | 4             |
| 27560500 | 8000_Mixed | Pepperoni and salami submarine sandwich, with lettuce, tomato and spread                                        | 19                 | 3.5                | C           | 4             |
| 27418310 | 8000_Mixed | Corned beef with tomato sauce and onion, Puerto Rican style                                                     | 19                 | 2                  | D           | 3             |
| 32202085 | 8000_Mixed | Egg, cheese and bacon on bagel                                                                                  | 19                 | 3                  | D           | 3             |
| 58101357 | 8000_Mixed | Soft taco with meat and sour cream, from fast food                                                              | 19                 | 3                  | C           | 3             |
| 27513041 | 8000_Mixed | Roast beef submarine sandwich, with cheese, lettuce, tomato and spread                                          | 19                 | 3.5                | C           | 4             |
| 58103200 | 8000_Mixed | Tamale, plain, meatless, no sauce, Puerto Rican style or Carribean Style                                        | 19                 | 2.5                | D           | 2             |
| 58121620 | 8000_Mixed | Dumpling, vegetable                                                                                             | 19                 | 3                  | C           | 2             |
| 27510000 | 8000_Mixed | Beef sandwich, NFS                                                                                              | 19                 | 3.5                | C           | 4             |
| 27540150 | 8000_Mixed | Chicken fillet, breaded, fried, sandwich with lettuce, tomato and spread                                        | 19                 | 3                  | C           | 4             |
| 58146453 | 8000_Mixed | Pasta with cream sauce, seafood, and added vegetables, ready-to-heat                                            | 19                 | 3                  | C           | 4             |
| 58100017 | 8000_Mixed | Burrito, taco, or quesadilla with egg, potato, and breakfast meat, from fast food                               | 19                 | 2                  | D           | 3             |
| 27560910 | 8000_Mixed | Cold cut submarine sandwich, with cheese, lettuce, tomato and spread                                            | 19                 | 3                  | C           | 4             |
| 58106210 | 8000_Mixed | Pizza, cheese, from restaurant or fast food, NS as to type of crust                                             | 19                 | 2.5                | C           | 4             |
| 58106225 | 8000_Mixed | Pizza, cheese, from restaurant or fast food, medium crust                                                       | 19                 | 2.5                | C           | 4             |
| 75601020 | 8000_Mixed | Asparagus soup, cream of, prepared with water                                                                   | 19                 | 4                  | C           | 4             |
| 27510140 | 8000_Mixed | Cheeseburger, 1 miniature patty, plain, on miniature bun, from fast food / restaurant                           | 19                 | 2                  | D           | 3             |
| 58103130 | 8000_Mixed | Tamale with chicken                                                                                             | 19                 | 3                  | D           | 1             |
| 27520530 | 8000_Mixed | Pork sandwich, with gravy                                                                                       | 19                 | 3.5                | B           | 3             |
| 27540180 | 8000_Mixed | Chicken patty sandwich or biscuit                                                                               | 19                 | 2                  | D           | 4             |
| 58400000 | 8000_Mixed | Soup, NFS                                                                                                       | 19                 | 3                  | C           | 4             |
| 28310330 | 8000_Mixed | Pho                                                                                                             | 19                 | 3.5                | B           | 2             |
| 58165010 | 8000_Mixed | Rice, white, with vegetables, cheese and/or cream based sauce, fat not added in cooking                         | 18                 | 3.5                | B           | 2             |
| 58165040 | 8000_Mixed | Rice, white, with vegetables and gravy, fat not added in cooking                                                | 18                 | 4                  | B           | 2             |
| 58103250 | 8000_Mixed | Tamale, plain, meatless, no sauce, Mexican style                                                                | 18                 | 4                  | B           | 1             |
| 27520370 | 8000_Mixed | Hot ham and cheese sandwich, on bun                                                                             | 18                 | 2                  | D           | 4             |
| 75607020 | 8000_Mixed | Mushroom soup, cream of, prepared with water                                                                    | 18                 | 3.5                | C           | 4             |
| 58106233 | 8000_Mixed | Pizza, cheese, stuffed crust                                                                                    | 18                 | 2                  | D           | 4             |
| 28345120 | 8000_Mixed | Chicken or turkey soup, cream of, prepared with milk                                                            | 18                 | 3                  | C           | 2             |
| 58403010 | 8000_Mixed | Chicken or turkey noodle soup, canned or ready-to-serve                                                         | 18                 | 3                  | C           | 4             |
| 28140740 | 8000_Mixed | Chicken patty or nuggets, boneless, breaded, with pasta and tomato sauce, fruit, dessert, frozen meal           | 18                 | 3.5                | C           | 4             |
| 58145136 | 8000_Mixed | Macaroni or noodles with cheese and meat, prepared from Hamburger Helper mix                                    | 18                 | 3.5                | B           | 2             |
| 28110000 | 8000_Mixed | Beef dinner, NFS, frozen meal                                                                                   | 18                 | 4                  | B           | 4             |
| 28110300 | 8000_Mixed | Salisbury steak dinner, NFS, frozen meal                                                                        | 18                 | 4                  | B           | 4             |
| 28110310 | 8000_Mixed | Salisbury steak with gravy, potatoes, vegetable, frozen meal                                                    | 18                 | 4                  | B           | 4             |
| 28110620 | 8000_Mixed | Beef short ribs, boneless, with barbecue sauce, potatoes, vegetable, frozen meal                                | 18                 | 4.5                | A           | 4             |
| 28101000 | 8000_Mixed | Frozen dinner, NFS                                                                                              | 18                 | 4                  | B           | 4             |
| 58116115 | 8000_Mixed | Empanada, Mexican turnover, filled with cheese and vegetables                                                   | 18                 | 2                  | D           | 3             |
| 58106565 | 8000_Mixed | Pizza with pepperoni, stuffed crust                                                                             | 18                 | 2                  | D           | 4             |
| 28143170 | 8000_Mixed | Chicken in cream sauce with noodles and vegetable, frozen meal                                                  | 18                 | 3.5                | B           | 4             |
| 27520166 | 8000_Mixed | Bacon, breaded fried chicken fillet, and tomato club sandwich with cheese, lettuce and spread                   | 18                 | 3                  | D           | 4             |
| 27520170 | 8000_Mixed | Bacon on biscuit                                                                                                | 18                 | 1.5                | D           | 3             |
| 27560120 | 8000_Mixed | Bologna and cheese sandwich, with spread                                                                        | 18                 | 1.5                | D           | 4             |
| 28140100 | 8000_Mixed | Chicken dinner, NFS, frozen meal                                                                                | 18                 | 3.5                | B           | 4             |
| 27520320 | 8000_Mixed | Ham and cheese sandwich, with lettuce and spread                                                                | 18                 | 2                  | D           | 4             |
| 27540300 | 8000_Mixed | Wrap sandwich filled with broiled chicken strips, cheese, lettuce, and spread                                   | 18                 | 3                  | C           | 4             |
| 27520156 | 8000_Mixed | Bacon, lettuce, tomato, and cheese submarine sandwich, with spread                                              | 18                 | 2.5                | D           | 4             |
| 58131310 | 8000_Mixed | Ravioli, meat-filled, no sauce                                                                                  | 18                 | 3                  | D           | 2             |
| 58404040 | 8000_Mixed | Chicken or turkey rice soup, reduced sodium, canned, prepared with water or ready-to-serve                      | 18                 | 3.5                | B           | 4             |
| 75607090 | 8000_Mixed | Mushroom soup, cream of, canned, reduced sodium, NS as to made with milk or water                               | 18                 | 4                  | B           | 4             |
| 75607140 | 8000_Mixed | Mushroom soup, cream of, canned, reduced sodium, prepared with water                                            | 18                 | 4                  | B           | 4             |
| 28110220 | 8000_Mixed | Sirloin, chopped, with gravy, mashed potatoes, vegetable, frozen meal                                           | 18                 | 4                  | C           | 4             |
| 75657000 | 8000_Mixed | Vegetable broth, bouillon                                                                                       | 18                 | 3                  | C           | 4             |
| 27510389 | 8000_Mixed | Double cheeseburger, 2 small patties, with condiments, on bun, from fast food / restaurant (McDonald's Big Mac) | 18                 | 2                  | D           | 4             |
| 73210110 | 8000_Mixed | Pumpkin fritters, Puerto Rican style                                                                            | 17                 | 3                  | D           | 2             |
| 32202200 | 8000_Mixed | Egg and cheese on biscuit                                                                                       | 17                 | 2                  | D           | 4             |
| 58164500 | 8000_Mixed | Rice, white, with cheese and/or cream based sauce, NS as to fat added in cooking                                | 17                 | 3                  | C           | 2             |
| 58164520 | 8000_Mixed | Rice, white, with cheese and/or cream based sauce, fat added in cooking                                         | 17                 | 3                  | C           | 2             |
| 28133340 | 8000_Mixed | Veal parmigiana with vegetable, fettuccine alfredo, dessert, frozen meal                                        | 17                 | 4                  | C           | 4             |
| 58148118 | 8000_Mixed | Macaroni or pasta salad, made with any type of fat free dressing                                                | 17                 | 3.5                | A           | 2             |
| 58146402 | 8000_Mixed | Pasta with cream sauce and meat, home recipe                                                                    | 17                 | 3                  | C           | 2             |
| 75607000 | 8000_Mixed | Mushroom soup, NFS                                                                                              | 17                 | 3.5                | C           | 4             |
| 27520350 | 8000_Mixed | Ham and cheese sandwich, with spread, grilled                                                                   | 17                 | 1.5                | D           | 4             |
| 58164510 | 8000_Mixed | Rice, white, with cheese and/or cream based sauce, fat not added in cooking                                     | 17                 | 3                  | C           | 2             |
| 27510266 | 8000_Mixed | Cheeseburger, 1 large patty, with condiments, on bun, from fast food / restaurant                               | 17                 | 3                  | D           | 4             |
| 58109040 | 8000_Mixed | Pizza, with meat, whole wheat thick crust                                                                       | 17                 | 2.5                | C           | 4             |
| 58126110 | 8000_Mixed | Turnover, meat-filled, no gravy                                                                                 | 17                 | 2                  | D           | 3             |
| 27213600 | 8000_Mixed | Beef and rice with cheese sauce                                                                                 | 17                 | 3.5                | B           | 2             |
| 58151170 | 8000_Mixed | Sushi roll, avocado                                                                                             | 17                 | 3                  | C           | 2             |
| 58151230 | 8000_Mixed | Sushi roll, vegetable                                                                                           | 17                 | 3                  | C           | 2             |
| 28141010 | 8000_Mixed | Chicken, fried, with potatoes, vegetable, dessert, frozen meal, large meat portion                              | 17                 | 4                  | C           | 4             |
| 52204000 | 8000_Mixed | Cornbread stuffing                                                                                              | 17                 | 3                  | C           | 4             |
| 58134660 | 8000_Mixed | Tortellini, cheese-filled, with cream sauce                                                                     | 17                 | 2.5                | C           | 2             |
| 28110370 | 8000_Mixed | Salisbury steak with gravy, macaroni and cheese, vegetable, frozen meal                                         | 16                 | 3                  | C           | 4             |
| 58121510 | 8000_Mixed | Dumpling, meat-filled                                                                                           | 16                 | 2                  | D           | 3             |
| 58131520 | 8000_Mixed | Ravioli, cheese-filled, with tomato sauce                                                                       | 16                 | 4                  | B           | 4             |
| 58106550 | 8000_Mixed | Pizza with pepperoni, from restaurant or fast food, thin crust                                                  | 16                 | 1.5                | D           | 4             |
| 27564363 | 8000_Mixed | Frankfurter or hot dog sandwich, fat free, plain, on whole grain white bun                                      | 16                 | 3.5                | C           | 4             |
| 27212100 | 8000_Mixed | Beef and noodles with tomato-based sauce                                                                        | 16                 | 3.5                | B           | 2             |
| 58104745 | 8000_Mixed | Quesadilla with chicken, from fast food                                                                         | 16                 | 1.5                | D           | 4             |
| 27520500 | 8000_Mixed | Pork sandwich, on white roll, with onions, dill pickles and barbecue sauce                                      | 16                 | 3                  | C           | 3             |
| 58106620 | 8000_Mixed | Pizza with meat other than pepperoni, from restaurant or fast food, thin crust                                  | 16                 | 1.5                | D           | 4             |
| 28317010 | 8000_Mixed | Beef stroganoff soup, chunky style, home recipe, canned or ready-to-serve                                       | 16                 | 3.5                | C           | 4             |
| 58100125 | 8000_Mixed | Burrito with meat and beans, from fast food                                                                     | 16                 | 3.5                | B           | 4             |
| 58104905 | 8000_Mixed | Taquito or flauta with egg and breakfast meat                                                                   | 16                 | 2                  | D           | 3             |
| 58156210 | 8000_Mixed | Rice with vienna sausage, Puerto Rican style                                                                    | 16                 | 1.5                | D           | 3             |
| 32202020 | 8000_Mixed | Egg, cheese, and ham on biscuit                                                                                 | 16                 | 3                  | D           | 3             |
| 28355430 | 8000_Mixed | Shrimp soup, cream of, prepared with water                                                                      | 16                 | 3                  | C           | 4             |
| 58150320 | 8000_Mixed | Rice, fried, with chicken                                                                                       | 16                 | 3.5                | B           | 1             |
| 27510667 | 8000_Mixed | Double hamburger, 2 small patties, with condiments, on bun, from fast food / restaurant                         | 16                 | 3.5                | C           | 4             |
| 27564503 | 8000_Mixed | Frankfurter or hot dog sandwich, with meatless chili, on whole grain white bun                                  | 16                 | 3                  | C           | 4             |

| foodcode | level1nd   | Description                                                                                                             | Food Compass Score | Health Star Rating | Nutri-Score | NOVA Category |
|----------|------------|-------------------------------------------------------------------------------------------------------------------------|--------------------|--------------------|-------------|---------------|
| 58304020 | 8000_Mixed | Spaghetti and meatballs with tomato sauce, sliced apples, bread, frozen meal                                            | 16                 | 3.5                | C           | 4             |
| 58104900 | 8000_Mixed | Taquito or flauta with egg                                                                                              | 16                 | 2.5                | D           | 3             |
| 58122220 | 8000_Mixed | Gnocchi, potato                                                                                                         | 16                 | 3.5                | C           | 1             |
| 27214600 | 8000_Mixed | Creamed dried beef on toast                                                                                             | 15                 | 2                  | D           | 2             |
| 28140250 | 8000_Mixed | Chicken, boneless, with gravy, dressing, rice, vegetable, dessert, frozen meal                                          | 15                 | 3.5                | A           | 4             |
| 58116210 | 8000_Mixed | Meat pie, Puerto Rican style                                                                                            | 15                 | 0.5                | E           | 2             |
| 28143210 | 8000_Mixed | Chicken in orange sauce with almond rice, diet frozen meal                                                              | 15                 | 4                  | B           | 4             |
| 27510231 | 8000_Mixed | Cheeseburger, 1 medium patty, with condiments, on bun, from fast food / restaurant (Burger King WHOPPER with cheese)    | 15                 | 2                  | D           | 4             |
| 27510233 | 8000_Mixed | Cheeseburger, 1 medium patty, with condiments, on bun, from fast food / restaurant (Wendy's 1/4 lb Single with cheese)  | 15                 | 2                  | D           | 4             |
| 27510705 | 8000_Mixed | Chiliburger, with or without cheese, on bun                                                                             | 15                 | 3.5                | C           | 4             |
| 58126150 | 8000_Mixed | Turnover, meat- and cheese-filled, tomato-based sauce                                                                   | 15                 | 3                  | C           | 4             |
| 58400200 | 8000_Mixed | Rice soup, NFS                                                                                                          | 15                 | 3                  | C           | 4             |
| 58404010 | 8000_Mixed | Chicken or turkey rice soup, canned, or ready-to-serve                                                                  | 15                 | 3                  | C           | 4             |
| 27112010 | 8000_Mixed | Salisbury steak with gravy                                                                                              | 15                 | 3                  | C           | 4             |
| 27540151 | 8000_Mixed | Chicken fillet, breaded, fried, sandwich with cheese, lettuce, tomato and spread                                        | 15                 | 2                  | D           | 4             |
| 27220150 | 8000_Mixed | Sausage and rice with mushroom sauce                                                                                    | 15                 | 3                  | C           | 3             |
| 14640000 | 8000_Mixed | Cheese sandwich, NFS                                                                                                    | 15                 | 1.5                | D           | 4             |
| 14640002 | 8000_Mixed | Cheese sandwich, American cheese, on white bread, no spread                                                             | 15                 | 1.5                | D           | 4             |
| 28110340 | 8000_Mixed | Salisbury steak with gravy, potatoes, vegetable, soup or macaroni and cheese, dessert, frozen meal                      | 15                 | 4                  | B           | 4             |
| 58106725 | 8000_Mixed | Pizza with meat and vegetables, from restaurant or fast food, medium crust                                              | 15                 | 2.5                | C           | 4             |
| 27510130 | 8000_Mixed | Beef barbecue submarine sandwich, on bun                                                                                | 15                 | 3.5                | B           | 3             |
| 27420470 | 8000_Mixed | Sausage and peppers, no sauce                                                                                           | 15                 | 2                  | D           | 4             |
| 27564443 | 8000_Mixed | Frankfurter or hot dog sandwich, with chili, on whole grain white bun                                                   | 15                 | 3                  | C           | 4             |
| 27564303 | 8000_Mixed | Frankfurter or hot dog sandwich, reduced fat or light, plain, on whole grain white bun                                  | 15                 | 3                  | C           | 4             |
| 27520410 | 8000_Mixed | Cuban sandwich, with spread                                                                                             | 15                 | 3.5                | C           | 4             |
| 27520510 | 8000_Mixed | Pork barbecue sandwich or Sloppy Joe, on bun                                                                            | 14                 | 3                  | D           | 3             |
| 58146443 | 8000_Mixed | Pasta with cream sauce and seafood, ready-to-heat                                                                       | 14                 | 2.5                | C           | 4             |
| 58146382 | 8000_Mixed | Pasta with cream sauce, home recipe                                                                                     | 14                 | 3                  | C           | 3             |
| 58150330 | 8000_Mixed | Rice, fried, with pork                                                                                                  | 14                 | 3.5                | B           | 1             |
| 58130013 | 8000_Mixed | Lasagna with meat, canned                                                                                               | 14                 | 3.5                | B           | 4             |
| 58131323 | 8000_Mixed | Ravioli, meat-filled, with tomato sauce or meat sauce, canned                                                           | 14                 | 3.5                | B           | 4             |
| 58147510 | 8000_Mixed | Flavored pasta                                                                                                          | 14                 | 3.5                | B           | 4             |
| 32202050 | 8000_Mixed | Egg, cheese, and sausage on biscuit                                                                                     | 14                 | 1.5                | D           | 4             |
| 58302000 | 8000_Mixed | Macaroni and cheese, diet frozen meal                                                                                   | 14                 | 3.5                | B           | 4             |
| 27564243 | 8000_Mixed | Frankfurter or hot dog sandwich, chicken and/or turkey, plain, on whole grain white bun                                 | 14                 | 2                  | D           | 4             |
| 27564361 | 8000_Mixed | Frankfurter or hot dog sandwich, fat free, plain, on wheat bun                                                          | 14                 | 3.5                | B           | 4             |
| 27564501 | 8000_Mixed | Frankfurter or hot dog sandwich, with meatless chili, on wheat bun                                                      | 14                 | 3                  | C           | 4             |
| 27510552 | 8000_Mixed | Hamburger, 1 small patty, with condiments, on bun, from fast food / restaurant (Burger King WHOPPER Jr.)                | 14                 | 3.5                | B           | 4             |
| 58147330 | 8000_Mixed | Macaroni or noodles, creamed, with cheese                                                                               | 14                 | 3.5                | B           | 3             |
| 27520540 | 8000_Mixed | Ham and tomato club sandwich, with lettuce and spread                                                                   | 14                 | 3                  | D           | 4             |
| 58124230 | 8000_Mixed | Pastry, meat / poultry-filled                                                                                           | 14                 | 2                  | D           | 2             |
| 27510171 | 8000_Mixed | Cheeseburger, 1 small patty, with condiments, on bun, from fast food / restaurant (Burger King WHOPPER Jr. with cheese) | 14                 | 3                  | C           | 4             |
| 27510175 | 8000_Mixed | Cheeseburger, 1 small patty, with condiments, on bun, from fast food / restaurant (Wendy's Jr. Cheeseburger Deluxe)     | 14                 | 3                  | C           | 4             |
| 27560720 | 8000_Mixed | Sausage and spaghetti sauce sandwich                                                                                    | 13                 | 2                  | D           | 4             |
| 27520110 | 8000_Mixed | Bacon sandwich, with spread                                                                                             | 13                 | 1.5                | D           | 4             |
| 27564520 | 8000_Mixed | Frankfurter or hot dog sandwich, with meatless chili, on wheat bread                                                    | 13                 | 2.5                | C           | 4             |
| 27510401 | 8000_Mixed | Double cheeseburger, 2 medium patties, plain, on bun, from fast food / restaurant                                       | 13                 | 2                  | D           | 4             |
| 27564123 | 8000_Mixed | Frankfurter or hot dog sandwich, beef and pork, plain, on whole grain white bun                                         | 13                 | 2                  | D           | 4             |
| 28141600 | 8000_Mixed | Chicken a la king with rice, frozen meal                                                                                | 13                 | 3                  | C           | 4             |
| 58146443 | 8000_Mixed | Pasta with cream sauce, poultry, and added vegetables, ready-to-heat                                                    | 13                 | 3                  | C           | 4             |
| 32202025 | 8000_Mixed | Egg, cheese and ham on bagel                                                                                            | 13                 | 2                  | D           | 4             |
| 27510671 | 8000_Mixed | Double hamburger, 2 medium patties, plain, on bun, from fast food / restaurant                                          | 13                 | 3                  | D           | 4             |
| 14640014 | 8000_Mixed | Cheese sandwich, reduced fat American cheese, on white bread, no spread                                                 | 13                 | 2                  | D           | 4             |
| 28110640 | 8000_Mixed | Meatballs, Swedish, in sauce, with noodles, frozen meal                                                                 | 13                 | 3                  | C           | 4             |
| 27520300 | 8000_Mixed | Ham sandwich, with spread                                                                                               | 13                 | 2                  | D           | 4             |
| 27220170 | 8000_Mixed | Sausage and rice with cheese sauce                                                                                      | 13                 | 3                  | C           | 3             |
| 27120210 | 8000_Mixed | Frankfurter or hot dog, with chili, no bun                                                                              | 13                 | 2                  | D           | 4             |
| 58116310 | 8000_Mixed | Cheese turnover, Puerto Rican style                                                                                     | 13                 | 1                  | E           | 2             |
| 27510700 | 8000_Mixed | Meatball and spaghetti sauce submarine sandwich                                                                         | 13                 | 3.5                | C           | 4             |
| 58107214 | 8000_Mixed | White pizza, cheese, with vegetables, thick crust                                                                       | 13                 | 3.5                | C           | 4             |
| 27564183 | 8000_Mixed | Frankfurter or hot dog sandwich, meat and poultry, plain, on whole grain white bun                                      | 13                 | 2                  | D           | 4             |
| 58306020 | 8000_Mixed | Beef enchilada, chili gravy, rice, refried beans, frozen meal                                                           | 13                 | 4                  | B           | 4             |
| 27564441 | 8000_Mixed | Frankfurter or hot dog sandwich, with chili, on wheat bun                                                               | 13                 | 3                  | C           | 4             |
| 27564442 | 8000_Mixed | Frankfurter or hot dog sandwich, with chili, on whole wheat bun                                                         | 13                 | 3                  | C           | 4             |
| 58126280 | 8000_Mixed | Turnover, chicken- or turkey-, and vegetable-filled, lower in fat                                                       | 13                 | 3.5                | A           | 4             |
| 58165070 | 8000_Mixed | Rice, white, with vegetables, soy-based sauce, fat not added in cooking                                                 | 12                 | 4                  | C           | 2             |
| 58150340 | 8000_Mixed | Rice, fried, with beef                                                                                                  | 12                 | 3.5                | A           | 1             |
| 27540210 | 8000_Mixed | Wrap sandwich filled with breaded fried chicken strips, cheese, lettuce, and spread                                     | 12                 | 3                  | D           | 4             |
| 27564460 | 8000_Mixed | Frankfurter or hot dog sandwich, with chili, on wheat bread                                                             | 12                 | 2.5                | C           | 4             |
| 58131510 | 8000_Mixed | Ravioli, cheese-filled, no sauce                                                                                        | 12                 | 2.5                | D           | 2             |
| 58107234 | 8000_Mixed | White pizza, cheese, with meat and vegetables, thick crust                                                              | 12                 | 2                  | D           | 4             |
| 58106610 | 8000_Mixed | Pizza with meat other than pepperoni, from restaurant or fast food, NS as to type of crust                              | 12                 | 2                  | D           | 4             |
| 58106625 | 8000_Mixed | Pizza with meat other than pepperoni, from restaurant or fast food, medium crust                                        | 12                 | 2                  | D           | 4             |
| 58134680 | 8000_Mixed | Tortellini, cheese-filled, no sauce                                                                                     | 12                 | 4                  | A           | 4             |
| 28140710 | 8000_Mixed | Chicken, fried, with potatoes, vegetable, frozen meal                                                                   | 12                 | 4                  | C           | 4             |
| 28140320 | 8000_Mixed | Chicken and noodles with vegetable, dessert, frozen meal                                                                | 12                 | 3.5                | C           | 4             |
| 27564380 | 8000_Mixed | Frankfurter or hot dog sandwich, fat free, plain, on wheat bread                                                        | 12                 | 3.5                | C           | 4             |
| 27515020 | 8000_Mixed | Steak and cheese submarine sandwich, with lettuce and tomato                                                            | 12                 | 3.5                | B           | 4             |
| 27510235 | 8000_Mixed | Cheeseburger submarine sandwich with lettuce, tomato and spread                                                         | 12                 | 3.5                | B           | 4             |
| 27510145 | 8000_Mixed | Cheeseburger, 1 miniature patty, with condiments, on miniature bun, from fast food / restaurant                         | 12                 | 2                  | D           | 4             |
| 27520310 | 8000_Mixed | Ham sandwich with lettuce and spread                                                                                    | 11                 | 3                  | C           | 4             |
| 58101457 | 8000_Mixed | Soft taco with chicken, from fast food                                                                                  | 11                 | 3.5                | C           | 4             |
| 27517000 | 8000_Mixed | Wrap sandwich filled with beef patty, cheese and spread and/or sauce                                                    | 11                 | 2                  | D           | 4             |
| 58101323 | 8000_Mixed | Taco or tostada with meat, from fast food                                                                               | 11                 | 3.5                | B           | 4             |
| 27564301 | 8000_Mixed | Frankfurter or hot dog sandwich, reduced fat or light, plain, on wheat bun                                              | 11                 | 3.5                | C           | 4             |
| 58106705 | 8000_Mixed | Pizza with meat and vegetables, from frozen, thick crust                                                                | 11                 | 2                  | D           | 4             |
| 28345010 | 8000_Mixed | Chicken or turkey soup, cream of, canned, reduced sodium, NS as to made with milk or water                              | 11                 | 3.5                | B           | 4             |
| 28345030 | 8000_Mixed | Chicken or turkey soup, cream of, canned, reduced sodium, made with water                                               | 11                 | 3.5                | B           | 4             |
| 27564241 | 8000_Mixed | Frankfurter or hot dog sandwich, chicken and/or turkey, plain, on wheat bun                                             | 11                 | 2                  | D           | 4             |
| 27510506 | 8000_Mixed | Hamburger, 1 miniature patty, with condiments, on miniature bun, from fast food / restaurant                            | 11                 | 3.5                | C           | 4             |
| 58150110 | 8000_Mixed | Rice, fried, meatless                                                                                                   | 11                 | 3                  | C           | 1             |
| 27510371 | 8000_Mixed | Double cheeseburger, 2 small patties, plain, on bun, from fast food / restaurant                                        | 11                 | 2                  | D           | 4             |
| 58150310 | 8000_Mixed | Rice, fried, NFS                                                                                                        | 11                 | 3                  | C           | 1             |
| 58146413 | 8000_Mixed | Pasta with cream sauce, meat, and added vegetables, ready-to-heat                                                       | 11                 | 3                  | C           | 4             |
| 27510486 | 8000_Mixed | Triple cheeseburger, 3 medium patties, with condiments, on bun, from fast food / restaurant                             | 11                 | 2                  | D           | 4             |
| 58123110 | 8000_Mixed | Sweet bread dough, filled with meat, steamed                                                                            | 11                 | 3.5                | C           | 2             |
| 32202035 | 8000_Mixed | Egg, extra cheese, and extra sausage, on bun                                                                            | 11                 | 1.5                | D           | 4             |
| 58407010 | 8000_Mixed | Instant soup, noodle                                                                                                    | 11                 | 3.5                | B           | 4             |
| 58107224 | 8000_Mixed | White pizza, cheese, with meat, thick crust                                                                             | 11                 | 2                  | D           | 4             |
| 58145113 | 8000_Mixed | Macaroni or noodles with cheese, canned                                                                                 | 11                 | 3.5                | B           | 4             |
| 27560410 | 8000_Mixed | Puerto Rican sandwich                                                                                                   | 11                 | 1.5                | D           | 4             |
| 27564003 | 8000_Mixed | Frankfurter or hot dog sandwich, NFS, plain, on whole grain white bun                                                   | 11                 | 1.5                | D           | 4             |

| foodcode | level1nd   | Description                                                                                                              | Food Compass Score | Health Star Rating | Nutri-Score | NOVA Category |
|----------|------------|--------------------------------------------------------------------------------------------------------------------------|--------------------|--------------------|-------------|---------------|
| 27564063 | 8000_Mixed | Frankfurter or hot dog sandwich, beef, plain, on whole grain white bun                                                   | 11                 | 1.5                | D           | 4             |
| 27510606 | 8000_Mixed | Hamburger, 1 medium patty, with condiments, on bun, from fast food / restaurant                                          | 11                 | 3.5                | C           | 4             |
| 58107207 | 8000_Mixed | White pizza, cheese, thick crust                                                                                         | 11                 | 3                  | C           | 4             |
| 58145117 | 8000_Mixed | Macaroni or noodles with cheese, Easy Mac type                                                                           | 11                 | 3.5                | B           | 4             |
| 27564504 | 8000_Mixed | Frankfurter or hot dog sandwich, with meatless chili, on multigrain bun                                                  | 10                 | 3                  | C           | 4             |
| 58124220 | 8000_Mixed | Pastry, egg and cheese filled                                                                                            | 10                 | 2                  | D           | 2             |
| 27510661 | 8000_Mixed | Double hamburger, 2 small patties, plain, on bun, from fast food / restaurant                                            | 10                 | 3                  | D           | 4             |
| 27560510 | 8000_Mixed | Salami sandwich, with spread                                                                                             | 10                 | 2                  | D           | 4             |
| 58103210 | 8000_Mixed | Tamale, meatless, with sauce, Puerto Rican or Caribbean style                                                            | 10                 | 1                  | E           | 2             |
| 58155610 | 8000_Mixed | Rice meal fritter, Puerto Rican style                                                                                    | 10                 | 2                  | D           | 2             |
| 51182010 | 8000_Mixed | Bread stuffing                                                                                                           | 10                 | 2.5                | C           | 4             |
| 27510110 | 8000_Mixed | Beef barbecue sandwich or Sloppy Joe, on bun                                                                             | 10                 | 2                  | D           | 3             |
| 71801020 | 8000_Mixed | Potato soup, prepared with water                                                                                         | 10                 | 4                  | C           | 4             |
| 27510225 | 8000_Mixed | Cheeseburger, 1 medium patty, with condiments, on bun, from fast food / restaurant                                       | 10                 | 2                  | D           | 4             |
| 27510232 | 8000_Mixed | Cheeseburger, 1 medium patty, with condiments, on bun, from fast food / restaurant (McDonald's Quarter Pounder with c    | 10                 | 2                  | D           | 4             |
| 58146393 | 8000_Mixed | Pasta with cream sauce and added vegetables, ready-to-heat                                                               | 10                 | 3                  | C           | 4             |
| 58310210 | 8000_Mixed | Sausage and french toast, frozen meal                                                                                    | 10                 | 3                  | C           | 4             |
| 28141201 | 8000_Mixed | Teriyaki chicken with rice and vegetable, diet frozen meal                                                               | 10                 | 3.5                | B           | 4             |
| 27211400 | 8000_Mixed | Corned beef hash                                                                                                         | 10                 | 3.5                | C           | 4             |
| 27214500 | 8000_Mixed | Corned beef patty                                                                                                        | 10                 | 3.5                | C           | 4             |
| 27260110 | 8000_Mixed | Hash, NS as to type of meat                                                                                              | 10                 | 3.5                | C           | 4             |
| 27510531 | 8000_Mixed | Hamburger, 1 small patty, plain, on bun, from fast food / restaurant                                                     | 9                  | 3.5                | C           | 4             |
| 27510601 | 8000_Mixed | Hamburger, 1 medium patty, plain, on bun, from fast food / restaurant                                                    | 9                  | 3.5                | C           | 4             |
| 27510215 | 8000_Mixed | Cheeseburger, 1 medium patty, plain, on bun, from fast food / restaurant                                                 | 9                  | 2                  | D           | 4             |
| 27564260 | 8000_Mixed | Frankfurter or hot dog sandwich, chicken and/or turkey, plain, on wheat bread                                            | 9                  | 2                  | D           | 4             |
| 27564121 | 8000_Mixed | Frankfurter or hot dog sandwich, beef and pork, plain, on wheat bun                                                      | 9                  | 2                  | D           | 4             |
| 58131523 | 8000_Mixed | Ravioli, cheese-filled, with tomato sauce, canned                                                                        | 9                  | 4                  | B           | 4             |
| 27513010 | 8000_Mixed | Roast beef sandwich                                                                                                      | 9                  | 2                  | D           | 4             |
| 58127330 | 8000_Mixed | Croissant sandwich with sausage, egg, and cheese                                                                         | 9                  | 1.5                | D           | 4             |
| 27510376 | 8000_Mixed | Double cheeseburger, 2 small patties, with condiments, on bun, from fast food / restaurant                               | 9                  | 2                  | D           | 4             |
| 27510386 | 8000_Mixed | Double cheeseburger, 2 small patties, with condiments, on bun, from fast food / restaurant (Burger King Double Cheesebur | 9                  | 2                  | D           | 4             |
| 27510387 | 8000_Mixed | Double cheeseburger, 2 small patties, with condiments, on bun, from fast food / restaurant (McDonald's Double Cheesebur  | 9                  | 2                  | D           | 4             |
| 27510388 | 8000_Mixed | Double cheeseburger, 2 small patties, with condiments, on bun, from fast food / restaurant (McDonald's McDouble)         | 9                  | 2                  | D           | 4             |
| 27510391 | 8000_Mixed | Double cheeseburger, 2 small patties, with condiments, on bun, from fast food / restaurant (Wendy's Double Stack)        | 9                  | 2                  | D           | 4             |
| 27564444 | 8000_Mixed | Frankfurter or hot dog sandwich, with chili, on multigrain bun                                                           | 9                  | 3                  | C           | 4             |
| 28110380 | 8000_Mixed | Salisbury steak with gravy, macaroni and cheese, frozen meal                                                             | 9                  | 3.5                | C           | 4             |
| 27120110 | 8000_Mixed | Sausage with tomato-based sauce                                                                                          | 9                  | 1.5                | D           | 4             |
| 27510406 | 8000_Mixed | Double cheeseburger, 2 medium patties, with condiments, on bun, from fast food / restaurant                              | 9                  | 2                  | D           | 4             |
| 27510412 | 8000_Mixed | Double cheeseburger, 2 medium patties, with condiments, on bun, from fast food / restaurant (McDonald's Double Quarter   | 9                  | 2                  | D           | 4             |
| 27510413 | 8000_Mixed | Double cheeseburger, 2 medium patties, with condiments, on bun, from fast food / restaurant (Wendy's 1/2 lb Double with  | 9                  | 2                  | D           | 4             |
| 27564181 | 8000_Mixed | Frankfurter or hot dog sandwich, meat and poultry, plain, on wheat bun                                                   | 9                  | 2                  | D           | 4             |
| 27510536 | 8000_Mixed | Hamburger, 1 small patty, with condiments, on bun, from fast food / restaurant                                           | 9                  | 3                  | C           | 4             |
| 27510551 | 8000_Mixed | Hamburger, 1 small patty, with condiments, on bun, from fast food / restaurant (Burger King Hamburger)                   | 9                  | 3                  | C           | 4             |
| 27510553 | 8000_Mixed | Hamburger, 1 small patty, with condiments, on bun, from fast food / restaurant (McDonald's Hamburger)                    | 9                  | 3                  | C           | 4             |
| 27510555 | 8000_Mixed | Hamburger, 1 small patty, with condiments, on bun, from fast food / restaurant (Wendy's Jr. Hamburger)                   | 9                  | 3                  | C           | 4             |
| 58146423 | 8000_Mixed | Pasta with cream sauce and poultry, ready-to-heat                                                                        | 9                  | 2.5                | C           | 4             |
| 27564510 | 8000_Mixed | Frankfurter or hot dog sandwich, with meatless chili, on white bread                                                     | 9                  | 2                  | D           | 4             |
| 27520420 | 8000_Mixed | Midnight sandwich, with spread                                                                                           | 9                  | 3.5                | D           | 4             |
| 58126160 | 8000_Mixed | Turnover, cheese-filled, tomato-based sauce                                                                              | 9                  | 1.5                | D           | 4             |
| 27564140 | 8000_Mixed | Frankfurter or hot dog sandwich, beef and pork, plain, on wheat bread                                                    | 9                  | 1.5                | D           | 4             |
| 58126270 | 8000_Mixed | Turnover, chicken- or turkey-, and cheese-filled, no gravy                                                               | 9                  | 3.5                | B           | 4             |
| 27564200 | 8000_Mixed | Frankfurter or hot dog sandwich, meat and poultry, plain, on wheat bread                                                 | 9                  | 2                  | D           | 4             |
| 27564320 | 8000_Mixed | Frankfurter or hot dog sandwich, reduced fat or light, plain, on wheat bread                                             | 9                  | 3.5                | C           | 4             |
| 27564500 | 8000_Mixed | Frankfurter or hot dog sandwich, with meatless chili, on white bun                                                       | 9                  | 3                  | C           | 4             |
| 58101347 | 8000_Mixed | Soft taco with meat, from fast food                                                                                      | 8                  | 3                  | C           | 4             |
| 27500050 | 8000_Mixed | Sandwich, NFS                                                                                                            | 8                  | 2                  | D           | 4             |
| 27500100 | 8000_Mixed | Meat sandwich, NFS                                                                                                       | 8                  | 2                  | D           | 4             |
| 27560110 | 8000_Mixed | Bologna sandwich, with spread                                                                                            | 8                  | 2                  | D           | 4             |
| 55610200 | 8000_Mixed | Dumpling, fried, Puerto Rican style                                                                                      | 8                  | 2                  | D           | 3             |
| 28110330 | 8000_Mixed | Salisbury steak with gravy, whipped potatoes, vegetable, dessert, frozen meal                                            | 8                  | 3                  | C           | 4             |
| 58163310 | 8000_Mixed | Flavored rice mixture                                                                                                    | 8                  | 3                  | C           | 4             |
| 58146200 | 8000_Mixed | Pasta, meat-filled, with gravy, canned                                                                                   | 8                  | 3                  | B           | 4             |
| 28140810 | 8000_Mixed | Chicken, fried, with potatoes, vegetable, dessert, frozen meal                                                           | 8                  | 4                  | B           | 4             |
| 27510160 | 8000_Mixed | Cheeseburger, 1 small patty, plain, on bun, from fast food / restaurant                                                  | 8                  | 2                  | D           | 4             |
| 58151400 | 8000_Mixed | Sushi, topped with crab                                                                                                  | 8                  | 3                  | C           | 2             |
| 27564450 | 8000_Mixed | Frankfurter or hot dog sandwich, with chili, on white bread                                                              | 8                  | 2                  | D           | 4             |
| 58122250 | 8000_Mixed | Kishke, stuffed derma                                                                                                    | 8                  | 1                  | D           | 2             |
| 58306500 | 8000_Mixed | Chicken burritos, diet frozen meal                                                                                       | 8                  | 1.5                | D           | 4             |
| 58163380 | 8000_Mixed | Flavored rice and pasta mixture                                                                                          | 7                  | 3                  | C           | 4             |
| 27510501 | 8000_Mixed | Hamburger, 1 miniature patty, plain, on miniature bun, from fast food / restaurant                                       | 7                  | 3.5                | C           | 4             |
| 27564001 | 8000_Mixed | Frankfurter or hot dog sandwich, NFS, plain, on wheat bun                                                                | 7                  | 1.5                | D           | 4             |
| 27564061 | 8000_Mixed | Frankfurter or hot dog sandwich, beef, plain, on wheat bun                                                               | 7                  | 1.5                | D           | 4             |
| 27564440 | 8000_Mixed | Frankfurter or hot dog sandwich, with chili, on white bun                                                                | 7                  | 3                  | C           | 4             |
| 74604100 | 8000_Mixed | Tomato beef rice soup, prepared with water                                                                               | 7                  | 3.5                | C           | 4             |
| 58108050 | 8000_Mixed | Pizza rolls                                                                                                              | 7                  | 2                  | D           | 4             |
| 58126300 | 8000_Mixed | Turnover, meat- and cheese-filled, tomato-based sauce, lower in fat                                                      | 7                  | 3                  | B           | 4             |
| 58146403 | 8000_Mixed | Pasta with cream sauce and meat, ready-to-heat                                                                           | 7                  | 2.5                | C           | 4             |
| 27560710 | 8000_Mixed | Sausage sandwich                                                                                                         | 7                  | 2                  | D           | 4             |
| 27564020 | 8000_Mixed | Frankfurter or hot dog sandwich, NFS, plain, on wheat bread                                                              | 7                  | 1.5                | D           | 4             |
| 27564080 | 8000_Mixed | Frankfurter or hot dog sandwich, beef, plain, on wheat bread                                                             | 7                  | 1.5                | D           | 4             |
| 27510165 | 8000_Mixed | Cheeseburger, 1 small patty, with condiments, on bun, from fast food / restaurant                                        | 7                  | 2                  | D           | 4             |
| 27510170 | 8000_Mixed | Cheeseburger, 1 small patty, with condiments, on bun, from fast food / restaurant (Burger King Cheeseburger)             | 7                  | 2                  | D           | 4             |
| 27510172 | 8000_Mixed | Cheeseburger, 1 small patty, with condiments, on bun, from fast food / restaurant (McDonald's Cheeseburger)              | 7                  | 2                  | D           | 4             |
| 27510173 | 8000_Mixed | Cheeseburger, 1 small patty, with condiments, on bun, from fast food / restaurant (Wendy's Kid's Cheeseburger)           | 7                  | 2                  | D           | 4             |
| 27510174 | 8000_Mixed | Cheeseburger, 1 small patty, with condiments, on bun, from fast food / restaurant (Wendy's Jr. Cheeseburger)             | 7                  | 2                  | D           | 4             |
| 74603010 | 8000_Mixed | Tomato beef soup, prepared with water                                                                                    | 7                  | 3.5                | C           | 4             |
| 74604010 | 8000_Mixed | Tomato beef noodle soup, prepared with water                                                                             | 7                  | 3.5                | C           | 4             |
| 32202060 | 8000_Mixed | Egg and sausage on biscuit                                                                                               | 6                  | 1.5                | D           | 4             |
| 58146383 | 8000_Mixed | Pasta with cream sauce, ready-to-heat                                                                                    | 6                  | 2.5                | C           | 4             |
| 27564364 | 8000_Mixed | Frankfurter or hot dog sandwich, fat free, plain, on multigrain bun                                                      | 6                  | 3.5                | B           | 4             |
| 27564244 | 8000_Mixed | Frankfurter or hot dog sandwich, chicken and/or turkey, plain, on multigrain bun                                         | 6                  | 2                  | D           | 4             |
| 58100013 | 8000_Mixed | Burrito, taco, or quesadilla with egg and breakfast meat, from fast food                                                 | 6                  | 1.5                | D           | 4             |
| 58127310 | 8000_Mixed | Croissant sandwich with ham, egg, and cheese                                                                             | 6                  | 1.5                | D           | 4             |
| 27564184 | 8000_Mixed | Frankfurter or hot dog sandwich, meat and poultry, plain, on multigrain bun                                              | 5                  | 2                  | D           | 4             |
| 58126130 | 8000_Mixed | Turnover, meat- and cheese-filled, no gravy                                                                              | 5                  | 3                  | C           | 4             |
| 27420040 | 8000_Mixed | Frankfurters or hot dogs and sauerkraut                                                                                  | 5                  | 1.5                | D           | 4             |
| 58127350 | 8000_Mixed | Croissant sandwich with bacon, egg, and cheese                                                                           | 5                  | 2                  | D           | 4             |
| 58408010 | 8000_Mixed | Wonton soup                                                                                                              | 5                  | 3                  | C           | 1             |
| 32202090 | 8000_Mixed | Egg and bacon on biscuit                                                                                                 | 5                  | 1.5                | D           | 4             |
| 58126120 | 8000_Mixed | Turnover, meat-filled, with gravy                                                                                        | 5                  | 2.5                | D           | 4             |
| 27135040 | 8000_Mixed | Veal with butter sauce                                                                                                   | 5                  | 3                  | D           | 1             |
| 27360050 | 8000_Mixed | Meat pie, NFS                                                                                                            | 5                  | 3                  | C           | 4             |

| foodcode | level1nd   | Description                                                                     | Food Compass Score | Health Star Rating | Nutri-Score | NOVA Category |
|----------|------------|---------------------------------------------------------------------------------|--------------------|--------------------|-------------|---------------|
| 58164540 | 8000_Mixed | Rice, white, with gravy, fat not added in cooking                               | 5                  | 3                  | C           | 2             |
| 27347100 | 8000_Mixed | Chicken or turkey pot pie                                                       | 5                  | 3                  | C           | 4             |
| 32202110 | 8000_Mixed | Egg and ham on biscuit                                                          | 5                  | 1.5                | D           | 4             |
| 32202070 | 8000_Mixed | Egg, cheese, and bacon on biscuit                                               | 5                  | 1.5                | D           | 4             |
| 58127290 | 8000_Mixed | Croissant sandwich with bacon and egg                                           | 5                  | 1.5                | D           | 4             |
| 27564370 | 8000_Mixed | Frankfurter or hot dog sandwich, fat free, plain, on white bread                | 5                  | 3                  | C           | 4             |
| 58126400 | 8000_Mixed | Turnover, filled with egg, meat and cheese                                      | 4                  | 2.5                | D           | 4             |
| 32202010 | 8000_Mixed | Egg, cheese, and ham on English muffin                                          | 4                  | 3                  | D           | 4             |
| 32202080 | 8000_Mixed | Egg, cheese, and bacon on English muffin                                        | 4                  | 3                  | D           | 4             |
| 27564124 | 8000_Mixed | Frankfurter or hot dog sandwich, beef and pork, plain, on multigrain bun        | 4                  | 2                  | D           | 4             |
| 55701000 | 8000_Mixed | Cake made with glutinous rice                                                   | 4                  | 2                  | D           | 2             |
| 58151180 | 8000_Mixed | Sushi roll, California                                                          | 4                  | 3                  | C           | 2             |
| 58151100 | 8000_Mixed | Sushi, NFS                                                                      | 4                  | 3                  | C           | 2             |
| 32202030 | 8000_Mixed | Egg, cheese, and sausage on English muffin                                      | 4                  | 2                  | D           | 4             |
| 58134623 | 8000_Mixed | Tortellini, cheese-filled, meatless, with tomato sauce, canned                  | 4                  | 3.5                | B           | 4             |
| 27564304 | 8000_Mixed | Frankfurter or hot dog sandwich, reduced fat or light, plain, on multigrain bun | 4                  | 3                  | C           | 4             |
| 27560670 | 8000_Mixed | Sausage and cheese on English muffin                                            | 4                  | 1.5                | E           | 4             |
| 27560650 | 8000_Mixed | Sausage on biscuit                                                              | 4                  | 1.5                | E           | 4             |
| 58127220 | 8000_Mixed | Croissant sandwich, filled with chicken, broccoli, and cheese sauce             | 3                  | 1.5                | D           | 4             |
| 27564250 | 8000_Mixed | Frankfurter or hot dog sandwich, chicken and/or turkey, plain, on white bread   | 3                  | 2                  | D           | 4             |
| 27564004 | 8000_Mixed | Frankfurter or hot dog sandwich, NFS, plain, on multigrain bun                  | 3                  | 1.5                | D           | 4             |
| 27564064 | 8000_Mixed | Frankfurter or hot dog sandwich, beef, plain, on multigrain bun                 | 3                  | 1.5                | D           | 4             |
| 58111200 | 8000_Mixed | Puffs, fried, crab meat and cream cheese filled                                 | 3                  | 1.5                | D           | 2             |
| 27540145 | 8000_Mixed | Chicken fillet, breaded, fried, sandwich on biscuit                             | 3                  | 1.5                | D           | 4             |
| 32202055 | 8000_Mixed | Egg, cheese, and sausage griddle cake sandwich                                  | 2                  | 1.5                | D           | 4             |
| 27564180 | 8000_Mixed | Frankfurter or hot dog sandwich, meat and poultry, plain, on white bun          | 2                  | 2                  | D           | 4             |
| 27564360 | 8000_Mixed | Frankfurter or hot dog sandwich, fat free, plain, on white bun                  | 2                  | 3.5                | C           | 4             |
| 27564130 | 8000_Mixed | Frankfurter or hot dog sandwich, beef and pork, plain, on white bread           | 2                  | 1.5                | D           | 4             |
| 27564190 | 8000_Mixed | Frankfurter or hot dog sandwich, meat and poultry, plain, on white bread        | 2                  | 1.5                | D           | 4             |
| 58310310 | 8000_Mixed | Pancakes and sausage, frozen meal                                               | 2                  | 2                  | D           | 4             |
| 27564240 | 8000_Mixed | Frankfurter or hot dog sandwich, chicken and/or turkey, plain, on white bun     | 2                  | 2                  | D           | 4             |
| 58163330 | 8000_Mixed | Flavored rice mixture with cheese                                               | 2                  | 3                  | C           | 4             |
| 58164570 | 8000_Mixed | Rice, white, with soy-based sauce, fat not added in cooking                     | 2                  | 3                  | C           | 2             |
| 27510910 | 8000_Mixed | Corned beef sandwich                                                            | 2                  | 3                  | D           | 4             |
| 58127270 | 8000_Mixed | Croissant sandwich with sausage and egg                                         | 1                  | 1.5                | E           | 4             |
| 27560350 | 8000_Mixed | Pig in a blanket, frankfurter or hot dog wrapped in dough                       | 1                  | 1.5                | E           | 4             |
| 27563010 | 8000_Mixed | Meat spread or potted meat sandwich                                             | 1                  | 2                  | D           | 4             |
| 32202045 | 8000_Mixed | Egg, cheese, and steak on bagel                                                 | 1                  | 2                  | D           | 4             |
| 27120250 | 8000_Mixed | Frankfurters or hot dogs with tomato-based sauce                                | 1                  | 1.5                | E           | 4             |
| 27511010 | 8000_Mixed | Pastrami sandwich                                                               | 1                  | 3                  | D           | 4             |
| 27520250 | 8000_Mixed | Ham on biscuit                                                                  | 1                  | 1                  | E           | 4             |
| 27560300 | 8000_Mixed | Corn dog, frankfurter or hot dog with cornbread coating                         | 1                  | 2                  | D           | 4             |
| 27560660 | 8000_Mixed | Sausage griddle cake sandwich                                                   | 1                  | 1.5                | D           | 4             |
| 27564000 | 8000_Mixed | Frankfurter or hot dog sandwich, NFS, plain, on white bun                       | 1                  | 1.5                | D           | 4             |
| 27564010 | 8000_Mixed | Frankfurter or hot dog sandwich, NFS, plain, on white bread                     | 1                  | 1.5                | D           | 4             |
| 27564060 | 8000_Mixed | Frankfurter or hot dog sandwich, beef, plain, on white bun                      | 1                  | 1.5                | D           | 4             |
| 27564070 | 8000_Mixed | Frankfurter or hot dog sandwich, beef, plain, on white bread                    | 1                  | 1.5                | D           | 4             |
| 27564120 | 8000_Mixed | Frankfurter or hot dog sandwich, beef and pork, plain, on white bun             | 1                  | 2                  | D           | 4             |
| 27564300 | 8000_Mixed | Frankfurter or hot dog sandwich, reduced fat or light, plain, on white bun      | 1                  | 3                  | C           | 4             |
| 27564310 | 8000_Mixed | Frankfurter or hot dog sandwich, reduced fat or light, plain, on white bread    | 1                  | 3                  | C           | 4             |
| 28321130 | 8000_Mixed | Bacon soup, cream of, prepared with water                                       | 1                  | 3                  | C           | 4             |
| 28345110 | 8000_Mixed | Chicken or turkey soup, cream of, NS as to prepared with milk or water          | 1                  | 3                  | C           | 4             |
| 28345130 | 8000_Mixed | Chicken or turkey soup, cream of, prepared with water                           | 1                  | 3                  | C           | 4             |
| 32202075 | 8000_Mixed | Egg, cheese, and bacon griddle cake sandwich                                    | 1                  | 1.5                | D           | 4             |
| 32202120 | 8000_Mixed | Egg, cheese and sausage on bagel                                                | 1                  | 2                  | D           | 4             |
| 58127200 | 8000_Mixed | Croissant sandwich, filled with broccoli and cheese                             | 1                  | 1.5                | D           | 4             |
| 58127210 | 8000_Mixed | Croissant sandwich, filled with ham and cheese                                  | 1                  | 1                  | E           | 4             |
| 58201000 | 8000_Mixed | Jelly sandwich, regular jelly, NFS                                              | 1                  | 3                  | C           | 4             |
| 58201005 | 8000_Mixed | Jelly sandwich, regular jelly, on white bread                                   | 1                  | 3                  | C           | 4             |
| 58201035 | 8000_Mixed | Jelly sandwich, reduced sugar jelly, on white bread                             | 1                  | 3                  | B           | 4             |
| 58400100 | 8000_Mixed | Noodle soup, NFS                                                                | 1                  | 3                  | C           | 4             |
| 58407030 | 8000_Mixed | Soup, mostly noodles                                                            | 1                  | 3                  | C           | 4             |
| 58407035 | 8000_Mixed | Soup, mostly noodles, reduced sodium                                            | 1                  | 3.5                | B           | 4             |
| 58407050 | 8000_Mixed | Instant soup, noodle with egg, shrimp or chicken                                | 1                  | 3                  | C           | 4             |



| foodcode | level1nd            | Description                                                                     | Food Compass Score | Health Star Rating | Nutri-Score | NOVA Category |
|----------|---------------------|---------------------------------------------------------------------------------|--------------------|--------------------|-------------|---------------|
| 61204000 | 8600_SauceCondiment | Lemon juice, 100%, NS as to form                                                | 100                | 4.5                | A           | 1             |
| 61204010 | 8600_SauceCondiment | Lemon juice, 100%, freshly squeezed                                             | 100                | 4.5                | A           | 1             |
| 61204200 | 8600_SauceCondiment | Lemon juice, 100%, canned or bottled                                            | 100                | 4.5                | A           | 1             |
| 74402260 | 8600_SauceCondiment | Enchilada sauce, green                                                          | 100                | 4.5                | A           | 1             |
| 74420110 | 8600_SauceCondiment | Puerto Rican seasoning without ham and tomato sauce                             | 100                | 4.5                | B           | 2             |
| 75121000 | 8600_SauceCondiment | Pepper, hot chili, raw                                                          | 100                | 4.5                | A           | 1             |
| 75226103 | 8600_SauceCondiment | Peppers, hot, cooked, from canned, fat not added in cooking                     | 100                | 2.5                | C           | 3             |
| 75226700 | 8600_SauceCondiment | Pimiento                                                                        | 100                | 4.5                | A           | 3             |
| 75511010 | 8600_SauceCondiment | Hot pepper sauce                                                                | 100                | 3.5                | C           | 3             |
| 75512510 | 8600_SauceCondiment | Recaito                                                                         | 100                | 5                  | A           | 1             |
| 74402110 | 8600_SauceCondiment | Salsa, pico de gallo                                                            | 100                | 4                  | A           | 1             |
| 61207000 | 8600_SauceCondiment | Lime juice, 100%, NS as to form                                                 | 98                 | 4.5                | A           | 1             |
| 61207010 | 8600_SauceCondiment | Lime juice, 100%, freshly squeezed                                              | 98                 | 4.5                | A           | 1             |
| 27150155 | 8600_SauceCondiment | Spaghetti sauce with seafood and added vegetables                               | 96                 | 4.5                | B           | 3             |
| 28522050 | 8600_SauceCondiment | Mole verde sauce                                                                | 95                 | 4.5                | A           | 1             |
| 61207200 | 8600_SauceCondiment | Lime juice, 100%, canned or bottled                                             | 94                 | 4.5                | A           | 1             |
| 74402200 | 8600_SauceCondiment | Salsa, red, homemade                                                            | 93                 | 4                  | B           | 2             |
| 75226100 | 8600_SauceCondiment | Peppers, hot, cooked, NS as to form, fat not added in cooking                   | 93                 | 4.5                | A           | 1             |
| 75226101 | 8600_SauceCondiment | Peppers, hot, cooked, from fresh, fat not added in cooking                      | 93                 | 4.5                | A           | 1             |
| 75226102 | 8600_SauceCondiment | Peppers, hot, cooked, from frozen, fat not added in cooking                     | 93                 | 4.5                | A           | 1             |
| 75412030 | 8600_SauceCondiment | Eggplant dip                                                                    | 93                 | 4.5                | A           | 1             |
| 74404020 | 8600_SauceCondiment | Spaghetti sauce with added vegetables                                           | 92                 | 4                  | B           | 2             |
| 27150151 | 8600_SauceCondiment | Spaghetti sauce with seafood                                                    | 92                 | 4.5                | A           | 3             |
| 41420200 | 8600_SauceCondiment | Natto                                                                           | 89                 | 5                  | A           | 3             |
| 74404050 | 8600_SauceCondiment | Spaghetti sauce, reduced sodium                                                 | 89                 | 4.5                | A           | 4             |
| 63409015 | 8600_SauceCondiment | Guacamole with tomatoes                                                         | 86                 | 4.5                | A           | 1             |
| 63409010 | 8600_SauceCondiment | Guacamole, NFS                                                                  | 85                 | 4.5                | B           | 1             |
| 41205075 | 8600_SauceCondiment | Hummus, flavored                                                                | 83                 | 4.5                | A           | 1             |
| 41205070 | 8600_SauceCondiment | Hummus, plain                                                                   | 82                 | 4.5                | A           | 1             |
| 75111500 | 8600_SauceCondiment | Garlic, raw                                                                     | 80                 | 5                  | A           | 1             |
| 27141035 | 8600_SauceCondiment | Spaghetti sauce with poultry and added vegetables                               | 80                 | 4.5                | A           | 1             |
| 75226093 | 8600_SauceCondiment | Peppers, hot, cooked, from canned, NS as to fat added in cooking                | 78                 | 2.5                | D           | 3             |
| 75226113 | 8600_SauceCondiment | Peppers, hot, cooked, from canned, fat added in cooking, NS as to type of fat   | 78                 | 2.5                | D           | 3             |
| 74402100 | 8600_SauceCondiment | Salsa, NFS                                                                      | 77                 | 4                  | C           | 4             |
| 74402150 | 8600_SauceCondiment | Salsa, red, commercially-prepared                                               | 77                 | 4                  | C           | 4             |
| 74404060 | 8600_SauceCondiment | Spaghetti sauce, fat free                                                       | 76                 | 4                  | C           | 3             |
| 75226092 | 8600_SauceCondiment | Peppers, hot, cooked, from frozen, NS as to fat added in cooking                | 76                 | 4                  | B           | 1             |
| 42204100 | 8600_SauceCondiment | Brown nut gravy, meatless                                                       | 75                 | 4.5                | B           | 2             |
| 11440060 | 8600_SauceCondiment | Tzatziki dip                                                                    | 73                 | 3.5                | B           | 2             |
| 27141030 | 8600_SauceCondiment | Spaghetti sauce with poultry                                                    | 73                 | 4.5                | A           | 1             |
| 75226090 | 8600_SauceCondiment | Peppers, hot, cooked, NS as to form, NS as to fat added in cooking              | 73                 | 4                  | B           | 3             |
| 75226091 | 8600_SauceCondiment | Peppers, hot, cooked, from fresh, NS as to fat added in cooking                 | 73                 | 4                  | B           | 3             |
| 75226110 | 8600_SauceCondiment | Peppers, hot, cooked, NS as to form, fat added in cooking, NS as to type of fat | 73                 | 4                  | B           | 3             |
| 75226111 | 8600_SauceCondiment | Peppers, hot, cooked, from fresh, fat added in cooking, NS as to type of fat    | 73                 | 4                  | B           | 3             |
| 75226112 | 8600_SauceCondiment | Peppers, hot, cooked, from frozen, fat added in cooking, NS as to type of fat   | 73                 | 4                  | B           | 3             |
| 74404010 | 8600_SauceCondiment | Spaghetti sauce                                                                 | 71                 | 4                  | C           | 4             |
| 27150200 | 8600_SauceCondiment | Oyster sauce                                                                    | 71                 | 3.5                | B           | 1             |
| 75506010 | 8600_SauceCondiment | Mustard                                                                         | 69                 | 3                  | C           | 3             |
| 28522000 | 8600_SauceCondiment | Mole poblano sauce                                                              | 69                 | 4                  | C           | 2             |
| 11440050 | 8600_SauceCondiment | Spinach dip, yogurt based                                                       | 68                 | 3                  | C           | 3             |
| 41205100 | 8600_SauceCondiment | Black bean sauce                                                                | 68                 | 1.5                | C           | 2             |
| 11440040 | 8600_SauceCondiment | Ranch dip, yogurt based                                                         | 67                 | 2.5                | D           | 2             |
| 11440020 | 8600_SauceCondiment | Dill dip, yogurt based                                                          | 65                 | 2.5                | D           | 3             |
| 11440070 | 8600_SauceCondiment | Vegetable dip, yogurt based                                                     | 65                 | 2.5                | D           | 3             |
| 75236500 | 8600_SauceCondiment | Yeast extract spread                                                            | 64                 | 0.5                | C           | 4             |
| 11440030 | 8600_SauceCondiment | Onion dip, yogurt based                                                         | 63                 | 3                  | C           | 3             |
| 75217400 | 8600_SauceCondiment | Garlic, cooked                                                                  | 63                 | 4.5                | A           | 1             |
| 41205050 | 8600_SauceCondiment | Bean dip, made with refried beans                                               | 61                 | 5                  | A           | 4             |
| 81302070 | 8600_SauceCondiment | Pesto sauce                                                                     | 61                 | 2                  | E           | 2             |
| 74402350 | 8600_SauceCondiment | Salsa verde or salsa, green                                                     | 61                 | 4                  | C           | 4             |
| 27162060 | 8600_SauceCondiment | Spaghetti sauce with meat and added vegetables                                  | 60                 | 4.5                | B           | 1             |
| 27162040 | 8600_SauceCondiment | Spaghetti sauce with meat                                                       | 59                 | 4                  | B           | 1             |
| 74410110 | 8600_SauceCondiment | Puerto Rican seasoning with ham                                                 | 59                 | 3.5                | D           | 2             |
| 41420110 | 8600_SauceCondiment | Miso                                                                            | 57                 | 2                  | C           | 3             |
| 75503090 | 8600_SauceCondiment | Horseradish                                                                     | 56                 | 4                  | B           | 4             |
| 28510010 | 8600_SauceCondiment | Gravy or sauce, poultry-based from Puerto Rican-style chicken fricassee         | 56                 | 3.5                | C           | 2             |
| 41420300 | 8600_SauceCondiment | Soy sauce                                                                       | 56                 | 0.5                | C           | 3             |
| 41420350 | 8600_SauceCondiment | Soy sauce, reduced sodium                                                       | 54                 | 0.5                | C           | 3             |
| 74404090 | 8600_SauceCondiment | Vodka sauce with tomatoes and cream                                             | 54                 | 4                  | C           | 2             |
| 41205055 | 8600_SauceCondiment | Layer dip                                                                       | 53                 | 4                  | C           | 2             |
| 11440010 | 8600_SauceCondiment | Chipotle dip, yogurt based                                                      | 53                 | 2.5                | D           | 4             |
| 74402250 | 8600_SauceCondiment | Enchilada sauce, red                                                            | 50                 | 4                  | C           | 4             |
| 14620115 | 8600_SauceCondiment | Spinach and artichoke dip                                                       | 50                 | 2.5                | D           | 3             |
| 12350240 | 8600_SauceCondiment | Spinach dip, regular                                                            | 49                 | 1.5                | D           | 3             |
| 12350010 | 8600_SauceCondiment | Dip, NFS                                                                        | 48                 | 1                  | E           | 2             |
| 12350230 | 8600_SauceCondiment | Ranch dip, regular                                                              | 48                 | 1                  | E           | 2             |
| 42204050 | 8600_SauceCondiment | Peanut sauce                                                                    | 47                 | 2.5                | D           | 3             |
| 12350210 | 8600_SauceCondiment | Dill dip, regular                                                               | 46                 | 1                  | E           | 3             |
| 12350250 | 8600_SauceCondiment | Vegetable dip, regular                                                          | 46                 | 1                  | E           | 3             |
| 83107000 | 8600_SauceCondiment | Mayonnaise, regular                                                             | 46                 | 0.5                | E           | 4             |
| 83100200 | 8600_SauceCondiment | Salad dressing, NFS, for sandwiches                                             | 46                 | 1                  | E           | 4             |
| 12350200 | 8600_SauceCondiment | Chipotle dip, regular                                                           | 46                 | 1.5                | E           | 3             |
| 12350220 | 8600_SauceCondiment | Onion dip, regular                                                              | 45                 | 1.5                | D           | 3             |
| 14620110 | 8600_SauceCondiment | Artichoke dip                                                                   | 45                 | 2.5                | D           | 3             |
| 14620130 | 8600_SauceCondiment | Seafood dip                                                                     | 45                 | 1.5                | E           | 3             |
| 83204030 | 8600_SauceCondiment | Mayonnaise, reduced fat, with olive oil                                         | 43                 | 1.5                | D           | 4             |
| 74415110 | 8600_SauceCondiment | Puerto Rican seasoning with ham and tomato sauce                                | 41                 | 3.5                | C           | 2             |
| 27150190 | 8600_SauceCondiment | Lobster sauce                                                                   | 41                 | 2                  | D           | 2             |
| 81302060 | 8600_SauceCondiment | Horseradish sauce                                                               | 41                 | 1.5                | E           | 4             |
| 63409020 | 8600_SauceCondiment | Chutney                                                                         | 40                 | 3.5                | C           | 1             |
| 14630300 | 8600_SauceCondiment | Welsh rarebit                                                                   | 40                 | 3                  | C           | 3             |
| 28500050 | 8600_SauceCondiment | Gravy, giblet                                                                   | 40                 | 3.5                | B           | 2             |
| 74401110 | 8600_SauceCondiment | Tomato catsup, reduced sodium                                                   | 39                 | 4                  | C           | 4             |
| 75506100 | 8600_SauceCondiment | Honey mustard dip                                                               | 39                 | 2                  | D           | 2             |
| 12350245 | 8600_SauceCondiment | Spinach dip, light                                                              | 39                 | 2.5                | D           | 3             |
| 14620200 | 8600_SauceCondiment | Cheese dip                                                                      | 39                 | 2.5                | D           | 2             |
| 14650100 | 8600_SauceCondiment | Cheese sauce                                                                    | 39                 | 2.5                | D           | 2             |
| 74405010 | 8600_SauceCondiment | Tomato relish                                                                   | 38                 | 3.5                | C           | 1             |
| 13411000 | 8600_SauceCondiment | White sauce, milk sauce                                                         | 38                 | 3                  | C           | 3             |
| 81302050 | 8600_SauceCondiment | Tartar sauce                                                                    | 37                 | 3                  | D           | 4             |
| 12350215 | 8600_SauceCondiment | Dill dip, light                                                                 | 35                 | 2                  | D           | 2             |
| 12350255 | 8600_SauceCondiment | Vegetable dip, light                                                            | 35                 | 2                  | D           | 2             |
| 12350235 | 8600_SauceCondiment | Ranch dip, light                                                                | 34                 | 2                  | D           | 2             |
| 64401000 | 8600_SauceCondiment | Vinegar                                                                         | 34                 | 3.5                | B           | 2             |
| 14630100 | 8600_SauceCondiment | Cheese fondue                                                                   | 33                 | 1.5                | D           | 2             |
| 74402010 | 8600_SauceCondiment | Tomato chili sauce                                                              | 33                 | 2.5                | C           | 4             |

| foodcode | level1nd            | Description                                                        | Food Compass Score | Health Star Rating | Nutri-Score | NOVA Category |
|----------|---------------------|--------------------------------------------------------------------|--------------------|--------------------|-------------|---------------|
| 14650150 | 8600_SauceCondiment | Cheese sauce made with lowfat cheese                               | 32                 | 2.5                | D           | 2             |
| 83204000 | 8600_SauceCondiment | Mayonnaise, light                                                  | 32                 | 2                  | D           | 4             |
| 14650195 | 8600_SauceCondiment | Alfredo sauce with seafood and added vegetables                    | 31                 | 2.5                | C           | 3             |
| 41420100 | 8600_SauceCondiment | Miso sauce                                                         | 31                 | 2                  | D           | 2             |
| 27150210 | 8600_SauceCondiment | Fish sauce                                                         | 31                 | 0.5                | C           | 4             |
| 14620150 | 8600_SauceCondiment | Cheese dip with chili pepper                                       | 31                 | 2.5                | D           | 4             |
| 12350225 | 8600_SauceCondiment | Onion dip, light                                                   | 30                 | 2.5                | D           | 3             |
| 28500150 | 8600_SauceCondiment | Gravy, redeye                                                      | 29                 | 3.5                | B           | 3             |
| 28500030 | 8600_SauceCondiment | Gravy, poultry, low sodium                                         | 29                 | 4                  | A           | 4             |
| 28500060 | 8600_SauceCondiment | Gravy, beef or meat, low sodium                                    | 29                 | 4                  | A           | 4             |
| 83110000 | 8600_SauceCondiment | Mayonnaise-type salad dressing                                     | 25                 | 2                  | D           | 4             |
| 12350205 | 8600_SauceCondiment | Chipotle dip, light                                                | 25                 | 2                  | D           | 3             |
| 75534550 | 8600_SauceCondiment | Wasabi paste                                                       | 24                 | 1                  | D           | 4             |
| 81312000 | 8600_SauceCondiment | Tartar sauce, reduced fat/calorie                                  | 24                 | 2.5                | C           | 2             |
| 13412000 | 8600_SauceCondiment | Milk gravy, quick gravy                                            | 24                 | 3                  | C           | 2             |
| 28520100 | 8600_SauceCondiment | Oyster-flavored sauce                                              | 23                 | 0.5                | C           | 4             |
| 83108000 | 8600_SauceCondiment | Mayonnaise, imitation                                              | 22                 | 2.5                | D           | 4             |
| 14650190 | 8600_SauceCondiment | Alfredo sauce with seafood                                         | 21                 | 2                  | D           | 3             |
| 14650185 | 8600_SauceCondiment | Alfredo sauce with poultry and added vegetables                    | 21                 | 3                  | D           | 2             |
| 28500020 | 8600_SauceCondiment | Gravy, meat, with fruit                                            | 21                 | 4                  | B           | 3             |
| 81301000 | 8600_SauceCondiment | Garlic sauce                                                       | 20                 | 2.5                | C           | 1             |
| 74406100 | 8600_SauceCondiment | Steak sauce, tomato-base                                           | 20                 | 2                  | D           | 4             |
| 83204050 | 8600_SauceCondiment | Mayonnaise-type salad dressing, light                              | 16                 | 2                  | D           | 4             |
| 14650175 | 8600_SauceCondiment | Alfredo sauce with meat and added vegetables                       | 16                 | 3                  | D           | 2             |
| 28510020 | 8600_SauceCondiment | Gravy, meat-based, from Puerto-Rican style stuffed pot roast       | 14                 | 2                  | D           | 2             |
| 74406500 | 8600_SauceCondiment | Cocktail sauce                                                     | 14                 | 3                  | D           | 4             |
| 14650165 | 8600_SauceCondiment | Alfredo sauce with added vegetables                                | 13                 | 3                  | D           | 3             |
| 14650180 | 8600_SauceCondiment | Alfredo sauce with poultry                                         | 12                 | 2                  | D           | 2             |
| 28500080 | 8600_SauceCondiment | Gravy, poultry, home recipe                                        | 12                 | 2.5                | C           | 2             |
| 74401010 | 8600_SauceCondiment | Tomato catsup                                                      | 11                 | 2.5                | D           | 4             |
| 81302040 | 8600_SauceCondiment | Sandwich spread                                                    | 11                 | 1.5                | E           | 4             |
| 28510030 | 8600_SauceCondiment | Gravy, meat-based, from Puerto-Rican style beef stew               | 11                 | 3.5                | C           | 2             |
| 41420450 | 8600_SauceCondiment | Worcestershire sauce                                               | 11                 | 2                  | D           | 4             |
| 81301020 | 8600_SauceCondiment | Lemon-butter sauce                                                 | 9                  | 1                  | D           | 2             |
| 14650170 | 8600_SauceCondiment | Alfredo sauce with meat                                            | 9                  | 2                  | D           | 2             |
| 41420250 | 8600_SauceCondiment | Hoisin sauce                                                       | 8                  | 1                  | D           | 4             |
| 28500010 | 8600_SauceCondiment | Gravy, meat or poultry, with wine                                  | 8                  | 3.5                | B           | 4             |
| 55502000 | 8600_SauceCondiment | Flour and water gravy                                              | 8                  | 3.5                | B           | 1             |
| 28500040 | 8600_SauceCondiment | Gravy, beef or meat                                                | 7                  | 3                  | C           | 4             |
| 28500070 | 8600_SauceCondiment | Gravy, beef or meat, home recipe                                   | 6                  | 2.5                | C           | 2             |
| 81302010 | 8600_SauceCondiment | Hollandaise sauce                                                  | 5                  | 0.5                | E           | 2             |
| 83300700 | 8600_SauceCondiment | Mayonnaise, fat free                                               | 5                  | 2.5                | C           | 4             |
| 14650160 | 8600_SauceCondiment | Alfredo sauce                                                      | 5                  | 2                  | D           | 3             |
| 91361070 | 8600_SauceCondiment | Plum sauce, Asian style                                            | 5                  | 2                  | D           | 1             |
| 41420410 | 8600_SauceCondiment | Teriyaki sauce, reduced sodium                                     | 3                  | 1                  | D           | 4             |
| 41420400 | 8600_SauceCondiment | Teriyaki sauce                                                     | 2                  | 0.5                | D           | 4             |
| 28520000 | 8600_SauceCondiment | Gravy or sauce, made with soy sauce, stock or bouillon, cornstarch | 2                  | 2.5                | C           | 2             |
| 28500000 | 8600_SauceCondiment | Gravy, poultry                                                     | 1                  | 3                  | C           | 4             |
| 28500100 | 8600_SauceCondiment | Gravy, mushroom                                                    | 1                  | 3                  | C           | 4             |
| 28501010 | 8600_SauceCondiment | Gravy, beef or meat, fat free                                      | 1                  | 3                  | C           | 4             |
| 28501110 | 8600_SauceCondiment | Gravy, poultry, fat free                                           | 1                  | 3                  | C           | 4             |
| 74406010 | 8600_SauceCondiment | Barbecue sauce                                                     | 1                  | 1.5                | D           | 4             |
| 91361010 | 8600_SauceCondiment | Sweet and sour sauce                                               | 1                  | 2.5                | C           | 4             |
| 91361050 | 8600_SauceCondiment | Duck sauce                                                         | 1                  | 2                  | D           | 4             |

| foodcode | level1nd         | Description                                                                                     | Food Compass Score | Health Star Rating | Nutri-Score | NOVA Category |
|----------|------------------|-------------------------------------------------------------------------------------------------|--------------------|--------------------|-------------|---------------|
| 91511090 | 9000_SavorySweet | Gelatin dessert, dietetic, with fruits and vegetables, sweetened with low calorie sweetener     | 93                 | 4.5                | A           | 2             |
| 91511100 | 9000_SavorySweet | Gelatin salad, dietetic, with vegetables, sweetened with low calorie sweetener                  | 84                 | 4                  | B           | 3             |
| 54403010 | 9000_SavorySweet | Popcorn, air-popped, unbuttered                                                                 | 80                 | 5                  | A           | 1             |
| 11460200 | 9000_SavorySweet | Yogurt, frozen, chocolate, nonfat milk                                                          | 77                 | 3.5                | A           | 4             |
| 11460400 | 9000_SavorySweet | Yogurt, frozen, chocolate, nonfat milk, with low-calorie sweetener                              | 77                 | 3.5                | A           | 4             |
| 11460300 | 9000_SavorySweet | Yogurt, frozen, flavors other than chocolate, nonfat milk                                       | 77                 | 3.5                | A           | 4             |
| 11460410 | 9000_SavorySweet | Yogurt, frozen, flavors other than chocolate, nonfat milk, with low-calorie sweetener           | 77                 | 3.5                | A           | 4             |
| 54403045 | 9000_SavorySweet | Popcorn, popped in oil, unbuttered                                                              | 74                 | 4                  | C           | 1             |
| 91701010 | 9000_SavorySweet | Almonds, chocolate covered                                                                      | 74                 | 4                  | D           | 4             |
| 41310900 | 9000_SavorySweet | Bean chips                                                                                      | 72                 | 5                  | C           | 2             |
| 91728500 | 9000_SavorySweet | Sugared pecans, sugar and egg white coating                                                     | 69                 | 4                  | D           | 4             |
| 73410210 | 9000_SavorySweet | Sweet potato chips                                                                              | 68                 | 4.5                | C           | 4             |
| 51808050 | 9000_SavorySweet | Breadsticks, hard, gluten free                                                                  | 68                 | 4                  | C           | 4             |
| 54340100 | 9000_SavorySweet | Crackers, gluten free, plain                                                                    | 68                 | 4                  | C           | 4             |
| 54340110 | 9000_SavorySweet | Crackers, gluten free, flavored                                                                 | 68                 | 4                  | C           | 4             |
| 91703500 | 9000_SavorySweet | Nuts, carob-coated                                                                              | 67                 | 3.5                | D           | 4             |
| 91742010 | 9000_SavorySweet | Sesame Crunch, Sahadi                                                                           | 66                 | 4                  | D           | 4             |
| 91511020 | 9000_SavorySweet | Gelatin dessert, dietetic, with fruit, sweetened with low calorie sweetener                     | 65                 | 4.5                | B           | 1             |
| 54318500 | 9000_SavorySweet | Rice cake                                                                                       | 65                 | 4                  | A           | 4             |
| 54305010 | 9000_SavorySweet | Crackers, crispbread                                                                            | 62                 | 4.5                | A           | 4             |
| 91708010 | 9000_SavorySweet | Date candy                                                                                      | 62                 | 3.5                | D           | 4             |
| 54403046 | 9000_SavorySweet | Popcorn, popped in oil, with added butter or margarine                                          | 61                 | 2.5                | D           | 3             |
| 54403083 | 9000_SavorySweet | Popcorn, ready-to-eat packaged, low sodium                                                      | 61                 | 4                  | C           | 4             |
| 54403084 | 9000_SavorySweet | Popcorn, ready-to-eat packaged, unsalted                                                        | 61                 | 4                  | C           | 4             |
| 54403040 | 9000_SavorySweet | Popcorn, air-popped, with added butter or margarine                                             | 59                 | 4                  | C           | 3             |
| 91501090 | 9000_SavorySweet | Gelatin dessert with fruit, vegetable, and nuts                                                 | 59                 | 4                  | B           | 2             |
| 91304080 | 9000_SavorySweet | Topping, fruit, unsweetened                                                                     | 59                 | 4                  | B           | 4             |
| 71202000 | 9000_SavorySweet | Potato chips, unsalted                                                                          | 58                 | 4                  | C           | 4             |
| 71220000 | 9000_SavorySweet | Vegetable chips                                                                                 | 58                 | 4.5                | C           | 4             |
| 54403054 | 9000_SavorySweet | Popcorn, microwave, low sodium                                                                  | 58                 | 3                  | C           | 4             |
| 54403055 | 9000_SavorySweet | Popcorn, microwave, unsalted                                                                    | 58                 | 3                  | C           | 4             |
| 11461270 | 9000_SavorySweet | Yogurt, frozen, cone, flavors other than chocolate, lowfat milk                                 | 58                 | 3.5                | B           | 4             |
| 54403082 | 9000_SavorySweet | Popcorn, ready-to-eat packaged, plain, light                                                    | 58                 | 4                  | C           | 4             |
| 54403061 | 9000_SavorySweet | Popcorn, microwave, kettle corn, light                                                          | 57                 | 4.5                | C           | 4             |
| 54403086 | 9000_SavorySweet | Popcorn, ready-to-eat packaged, butter flavored, light                                          | 57                 | 3                  | C           | 4             |
| 54403088 | 9000_SavorySweet | Popcorn, ready-to-eat packaged, cheese flavored, light                                          | 57                 | 3                  | C           | 4             |
| 54403081 | 9000_SavorySweet | Popcorn, ready-to-eat packaged, plain                                                           | 56                 | 3                  | C           | 4             |
| 56205200 | 9000_SavorySweet | Rice, frozen dessert, nondairy, flavors other than chocolate                                    | 56                 | 4                  | B           | 4             |
| 71202100 | 9000_SavorySweet | Potato chips, reduced fat, unsalted                                                             | 56                 | 4.5                | B           | 4             |
| 54420210 | 9000_SavorySweet | Multigrain chips (Sun Chips)                                                                    | 56                 | 3                  | C           | 4             |
| 54440020 | 9000_SavorySweet | Cracker chips                                                                                   | 56                 | 3                  | C           | 4             |
| 91732100 | 9000_SavorySweet | Planters Peanut Bar                                                                             | 56                 | 3.5                | E           | 4             |
| 54403059 | 9000_SavorySweet | Popcorn, microwave, kettle corn                                                                 | 56                 | 3                  | C           | 4             |
| 71202500 | 9000_SavorySweet | Potato chips, lightly salted                                                                    | 56                 | 4                  | C           | 4             |
| 71202510 | 9000_SavorySweet | Potato chips, restructured, lightly salted                                                      | 56                 | 4                  | C           | 4             |
| 54403053 | 9000_SavorySweet | Popcorn, microwave, plain, light                                                                | 56                 | 3.5                | C           | 4             |
| 54403057 | 9000_SavorySweet | Popcorn, microwave, butter flavored, light                                                      | 56                 | 3.5                | C           | 4             |
| 54401011 | 9000_SavorySweet | Corn nuts                                                                                       | 55                 | 3                  | C           | 4             |
| 11460160 | 9000_SavorySweet | Yogurt, frozen, chocolate, lowfat milk                                                          | 55                 | 3.5                | B           | 4             |
| 91727010 | 9000_SavorySweet | Nuts, chocolate covered, not almonds or peanuts                                                 | 55                 | 1.5                | E           | 4             |
| 56205240 | 9000_SavorySweet | Rice dessert bar, frozen, chocolate, nondairy, chocolate covered                                | 54                 | 3.5                | B           | 4             |
| 91511070 | 9000_SavorySweet | Gelatin dessert, dietetic, with fruit and sour cream, sweetened with low calorie sweetener      | 54                 | 4.5                | A           | 4             |
| 91716010 | 9000_SavorySweet | Halvah, plain                                                                                   | 54                 | 2.5                | D           | 4             |
| 54403080 | 9000_SavorySweet | Popcorn, ready-to-eat packaged, NFS                                                             | 54                 | 2.5                | D           | 4             |
| 54403085 | 9000_SavorySweet | Popcorn, ready-to-eat packaged, butter flavored                                                 | 54                 | 2.5                | D           | 4             |
| 71200110 | 9000_SavorySweet | Potato chips, barbecue flavored                                                                 | 53                 | 3.5                | D           | 4             |
| 71200120 | 9000_SavorySweet | Potato chips, sour cream and onion flavored                                                     | 53                 | 3.5                | D           | 4             |
| 71200130 | 9000_SavorySweet | Potato chips, cheese flavored                                                                   | 53                 | 3.5                | D           | 4             |
| 71200140 | 9000_SavorySweet | Potato chips, other flavored                                                                    | 53                 | 3.5                | D           | 4             |
| 71200210 | 9000_SavorySweet | Potato chips, ruffled, barbecue flavored                                                        | 53                 | 3.5                | D           | 4             |
| 71200220 | 9000_SavorySweet | Potato chips, ruffled, sour cream and onion flavored                                            | 53                 | 3.5                | D           | 4             |
| 71200230 | 9000_SavorySweet | Potato chips, ruffled, cheese flavored                                                          | 53                 | 3.5                | D           | 4             |
| 71200240 | 9000_SavorySweet | Potato chips, ruffled, other flavored                                                           | 53                 | 3.5                | D           | 4             |
| 54319020 | 9000_SavorySweet | Popcorn cake                                                                                    | 53                 | 4                  | A           | 4             |
| 11460190 | 9000_SavorySweet | Yogurt, frozen, NS as to flavor, nonfat milk                                                    | 53                 | 3                  | B           | 4             |
| 54403087 | 9000_SavorySweet | Popcorn, ready-to-eat packaged, cheese flavored                                                 | 52                 | 2.5                | D           | 4             |
| 54403092 | 9000_SavorySweet | Popcorn, ready-to-eat packaged, other flavored                                                  | 52                 | 2.5                | D           | 4             |
| 71200010 | 9000_SavorySweet | Potato chips, NFS                                                                               | 52                 | 3.5                | C           | 4             |
| 71200100 | 9000_SavorySweet | Potato chips, plain                                                                             | 52                 | 3.5                | C           | 4             |
| 71200200 | 9000_SavorySweet | Potato chips, ruffled, plain                                                                    | 52                 | 3.5                | C           | 4             |
| 54401026 | 9000_SavorySweet | Corn chips, flavored                                                                            | 52                 | 2.5                | C           | 4             |
| 54401031 | 9000_SavorySweet | Corn chips, plain (Fritos)                                                                      | 52                 | 2.5                | C           | 4             |
| 91304060 | 9000_SavorySweet | Topping, nuts and syrup                                                                         | 51                 | 3                  | D           | 4             |
| 91701020 | 9000_SavorySweet | Almonds, sugar-coated                                                                           | 51                 | 3                  | D           | 4             |
| 71201050 | 9000_SavorySweet | Potato chips, reduced fat                                                                       | 50                 | 4                  | C           | 4             |
| 54401035 | 9000_SavorySweet | Corn chips, flavored (Fritos)                                                                   | 50                 | 2                  | D           | 4             |
| 54401021 | 9000_SavorySweet | Corn chips, plain                                                                               | 49                 | 2                  | D           | 4             |
| 53116500 | 9000_SavorySweet | Cake or cupcake, pumpkin, without icing or filling                                              | 49                 | 2                  | D           | 2             |
| 91728000 | 9000_SavorySweet | Nut roll, fudge or nougat, caramel and nuts                                                     | 48                 | 3                  | D           | 4             |
| 54305020 | 9000_SavorySweet | Crackers, flatbread                                                                             | 48                 | 4                  | C           | 4             |
| 56205230 | 9000_SavorySweet | Rice dessert bar, frozen, flavors other than chocolate, nondairy, carob covered                 | 48                 | 3.5                | B           | 4             |
| 53104100 | 9000_SavorySweet | Cake or cupcake, carrot, without icing or filling                                               | 48                 | 2                  | D           | 2             |
| 91731100 | 9000_SavorySweet | Peanuts, sugar-coated                                                                           | 48                 | 1.5                | D           | 4             |
| 91732000 | 9000_SavorySweet | Peanut bar                                                                                      | 48                 | 1.5                | D           | 4             |
| 54318000 | 9000_SavorySweet | Chips, rice                                                                                     | 47                 | 4                  | A           | 4             |
| 91407150 | 9000_SavorySweet | Bean paste, sweetened                                                                           | 47                 | 4                  | B           | 2             |
| 13250200 | 9000_SavorySweet | Mousse, chocolate, lowfat, reduced calorie, prepared from dry mix, water added                  | 47                 | 3.5                | B           | 3             |
| 91701030 | 9000_SavorySweet | Almonds, yogurt-covered                                                                         | 47                 | 1                  | E           | 4             |
| 53102600 | 9000_SavorySweet | Cake or cupcake, banana, without icing or filling                                               | 47                 | 2                  | D           | 2             |
| 54401090 | 9000_SavorySweet | Corn chips, reduced sodium                                                                      | 47                 | 2.5                | C           | 4             |
| 91511110 | 9000_SavorySweet | Gelatin dessert, dietetic, with fruit and whipped topping, sweetened with low calorie sweetener | 47                 | 4.5                | B           | 2             |
| 71205020 | 9000_SavorySweet | Potato sticks, plain                                                                            | 46                 | 3                  | D           | 4             |
| 54200100 | 9000_SavorySweet | Crackers, butter, reduced sodium                                                                | 45                 | 4                  | B           | 4             |
| 54204020 | 9000_SavorySweet | Crackers, wheat, reduced sodium                                                                 | 45                 | 4                  | B           | 4             |
| 54204030 | 9000_SavorySweet | Crackers, woven wheat, reduced sodium                                                           | 45                 | 4                  | B           | 4             |
| 51306000 | 9000_SavorySweet | Breadsticks, hard, whole wheat                                                                  | 45                 | 3                  | C           | 4             |
| 54328120 | 9000_SavorySweet | Crackers, whole grain, sandwich, peanut butter filled                                           | 45                 | 2.5                | D           | 4             |
| 53452100 | 9000_SavorySweet | Pastry, fruit-filled                                                                            | 45                 | 2.5                | C           | 2             |
| 11461280 | 9000_SavorySweet | Yogurt, frozen, cone, chocolate, lowfat milk                                                    | 44                 | 3.5                | B           | 4             |
| 53102100 | 9000_SavorySweet | Cake or cupcake, applesauce, without icing or filling                                           | 44                 | 2                  | D           | 2             |
| 54403091 | 9000_SavorySweet | Popcorn, ready-to-eat packaged, kettle corn, light                                              | 44                 | 3                  | C           | 4             |
| 91731150 | 9000_SavorySweet | Peanuts, yogurt covered                                                                         | 44                 | 0.5                | E           | 4             |
| 53117100 | 9000_SavorySweet | Cake or cupcake, spice, without icing or filling                                                | 44                 | 2                  | D           | 2             |
| 71205030 | 9000_SavorySweet | Potato sticks, flavored                                                                         | 43                 | 2.5                | E           | 4             |

| foodcode | levelInd         | Description                                                                                                         | Food Compass Score | Health Star Rating | Nutri-Score | NOVA Category |
|----------|------------------|---------------------------------------------------------------------------------------------------------------------|--------------------|--------------------|-------------|---------------|
| 71205040 | 9000_SavorySweet | Potato sticks, fry shaped                                                                                           | 43                 | 2.5                | E           | 4             |
| 53440500 | 9000_SavorySweet | Strudel, cherry                                                                                                     | 43                 | 3.5                | C           | 2             |
| 71980200 | 9000_SavorySweet | Taro chips                                                                                                          | 42                 | 3.5                | C           | 4             |
| 91304070 | 9000_SavorySweet | Topping, peanut butter, thick, fudge type                                                                           | 42                 | 2                  | C           | 4             |
| 54325060 | 9000_SavorySweet | Crackers, saltine, multigrain                                                                                       | 42                 | 2.5                | C           | 4             |
| 71200400 | 9000_SavorySweet | Potato chips, baked, plain                                                                                          | 42                 | 4                  | C           | 4             |
| 71203010 | 9000_SavorySweet | Potato chips, popped, plain                                                                                         | 42                 | 4                  | C           | 4             |
| 71203030 | 9000_SavorySweet | Potato chips, popped, NFS                                                                                           | 42                 | 4                  | C           | 4             |
| 91406000 | 9000_SavorySweet | Jam, preserve, marmalade, sugar free, all flavors                                                                   | 42                 | 4.5                | A           | 4             |
| 91501110 | 9000_SavorySweet | Gelatin dessert with fruit and whipped topping                                                                      | 41                 | 4                  | C           | 2             |
| 91703060 | 9000_SavorySweet | Caramel with nuts, chocolate covered                                                                                | 41                 | 1.5                | D           | 4             |
| 54337060 | 9000_SavorySweet | Crackers, woven wheat, reduced fat                                                                                  | 41                 | 3                  | C           | 4             |
| 71905410 | 9000_SavorySweet | Plantain chips                                                                                                      | 41                 | 3                  | D           | 4             |
| 11460100 | 9000_SavorySweet | Yogurt, frozen, chocolate, NS as to type of milk                                                                    | 41                 | 3                  | C           | 4             |
| 11460430 | 9000_SavorySweet | Yogurt, frozen, chocolate, whole milk                                                                               | 41                 | 3                  | C           | 4             |
| 13220220 | 9000_SavorySweet | Pudding, chocolate, prepared from dry mix, low calorie, containing artificial sweetener, milk added                 | 40                 | 3.5                | C           | 3             |
| 91716110 | 9000_SavorySweet | Halvah, chocolate covered                                                                                           | 40                 | 1                  | E           | 4             |
| 53116550 | 9000_SavorySweet | Cake or cupcake, raisin-nut                                                                                         | 40                 | 1.5                | D           | 2             |
| 71200410 | 9000_SavorySweet | Potato chips, baked, flavored                                                                                       | 40                 | 3.5                | D           | 4             |
| 71203020 | 9000_SavorySweet | Potato chips, popped, flavored                                                                                      | 40                 | 3.5                | D           | 4             |
| 91700500 | 9000_SavorySweet | M&M's Almond Chocolate Candies                                                                                      | 40                 | 1                  | E           | 4             |
| 71201060 | 9000_SavorySweet | Potato chips, fat free                                                                                              | 40                 | 4                  | C           | 4             |
| 71200300 | 9000_SavorySweet | Potato chips, restructured, plain                                                                                   | 39                 | 3                  | D           | 4             |
| 13160160 | 9000_SavorySweet | Fat free ice cream, no sugar added, flavors other than chocolate                                                    | 39                 | 3.5                | B           | 4             |
| 44201000 | 9000_SavorySweet | Carob chips                                                                                                         | 39                 | 1.5                | E           | 4             |
| 91301082 | 9000_SavorySweet | Chocolate syrup, thin type, sugar free                                                                              | 39                 | 3.5                | A           | 4             |
| 71200310 | 9000_SavorySweet | Potato chips, restructured, flavored                                                                                | 38                 | 2.5                | D           | 4             |
| 13140710 | 9000_SavorySweet | Light ice cream, creamsicle or dreamsicle, no sugar added                                                           | 38                 | 3.5                | A           | 4             |
| 91405000 | 9000_SavorySweet | Jelly, sugar free, all flavors                                                                                      | 38                 | 4.5                | A           | 4             |
| 91731000 | 9000_SavorySweet | Peanuts, chocolate covered                                                                                          | 38                 | 1                  | E           | 4             |
| 13210810 | 9000_SavorySweet | Pumpkin pudding, Puerto Rican style                                                                                 | 38                 | 4                  | C           | 3             |
| 91406000 | 9000_SavorySweet | Jam, preserve, marmalade, reduced sugar, all flavors                                                                | 37                 | 3                  | C           | 3             |
| 91406500 | 9000_SavorySweet | Jam, preserve, marmalade, sweetened with fruit juice concentrates, all flavors                                      | 37                 | 3                  | C           | 3             |
| 54403089 | 9000_SavorySweet | Popcorn, ready-to-eat-packaged, kettle corn                                                                         | 37                 | 2                  | D           | 4             |
| 53115310 | 9000_SavorySweet | Cake or cupcake, nut, without icing or filling                                                                      | 36                 | 1.5                | D           | 2             |
| 58124210 | 9000_SavorySweet | Pastry, cheese-filled                                                                                               | 36                 | 2                  | D           | 2             |
| 71201200 | 9000_SavorySweet | Potato chips, restructured, reduced fat, lightly salted                                                             | 36                 | 3                  | D           | 4             |
| 13220210 | 9000_SavorySweet | Pudding, flavors other than chocolate, prepared from dry mix, low calorie, containing artificial sweetener, milk ad | 35                 | 3.5                | C           | 3             |
| 91405500 | 9000_SavorySweet | Jelly, reduced sugar, all flavors                                                                                   | 35                 | 3                  | C           | 3             |
| 91520100 | 9000_SavorySweet | Yokan                                                                                                               | 35                 | 4                  | C           | 2             |
| 13120750 | 9000_SavorySweet | Ice cream cone with nuts, chocolate ice cream                                                                       | 35                 | 2.5                | C           | 4             |
| 53415200 | 9000_SavorySweet | Fritter, banana                                                                                                     | 35                 | 3                  | C           | 3             |
| 53387000 | 9000_SavorySweet | Pie, Toll house chocolate chip                                                                                      | 35                 | 1                  | E           | 3             |
| 91501020 | 9000_SavorySweet | Gelatin dessert with fruit                                                                                          | 34                 | 4                  | B           | 3             |
| 91733200 | 9000_SavorySweet | Peanut Bar, chocolate covered candy                                                                                 | 34                 | 1                  | E           | 4             |
| 54402080 | 9000_SavorySweet | Tortilla chips, reduced sodium                                                                                      | 34                 | 3.5                | A           | 4             |
| 13160400 | 9000_SavorySweet | Fat free ice cream, flavors other than chocolate                                                                    | 34                 | 3.5                | B           | 4             |
| 13160420 | 9000_SavorySweet | Fat free ice cream, NS as to flavor                                                                                 | 34                 | 3.5                | B           | 4             |
| 53415300 | 9000_SavorySweet | Crisp, blueberry                                                                                                    | 34                 | 3                  | C           | 3             |
| 63403150 | 9000_SavorySweet | Lime souffle                                                                                                        | 33                 | 2                  | D           | 4             |
| 91511080 | 9000_SavorySweet | Gelatin dessert, dietetic, with fruit and cream cheese, sweetened with low calorie sweetener                        | 33                 | 4.5                | B           | 4             |
| 91713060 | 9000_SavorySweet | Fudge, peanut butter, with nuts                                                                                     | 33                 | 1                  | E           | 4             |
| 91731010 | 9000_SavorySweet | M&M's Peanut Chocolate Candies                                                                                      | 33                 | 0.5                | E           | 4             |
| 13120780 | 9000_SavorySweet | Ice cream cone, chocolate covered, with nuts, chocolate ice cream                                                   | 33                 | 2                  | D           | 4             |
| 91501120 | 9000_SavorySweet | Gelatin dessert with fruit and vegetables                                                                           | 33                 | 4                  | B           | 3             |
| 13161000 | 9000_SavorySweet | Milk dessert bar, frozen, made from lowfat milk                                                                     | 32                 | 4                  | A           | 4             |
| 53415220 | 9000_SavorySweet | Fritter, berry                                                                                                      | 32                 | 2.5                | C           | 3             |
| 58157210 | 9000_SavorySweet | Rice pudding made with coconut milk, Puerto Rican style                                                             | 32                 | 1.5                | D           | 1             |
| 91705070 | 9000_SavorySweet | Chocolate, milk, with peanuts                                                                                       | 32                 | 1                  | E           | 4             |
| 91303000 | 9000_SavorySweet | Molasses                                                                                                            | 32                 | 1                  | D           | 2             |
| 91403000 | 9000_SavorySweet | Fruit butter, all flavors                                                                                           | 32                 | 3.5                | C           | 3             |
| 13120700 | 9000_SavorySweet | Ice cream cone with nuts, flavors other than chocolate                                                              | 32                 | 2.5                | D           | 4             |
| 63420110 | 9000_SavorySweet | Fruit juice bar, frozen, flavor other than orange                                                                   | 32                 | 4                  | C           | 4             |
| 63430100 | 9000_SavorySweet | Sorbet, fruit, noncitrus flavor                                                                                     | 32                 | 4                  | C           | 4             |
| 53105300 | 9000_SavorySweet | Cake or cupcake, German chocolate, with icing or filling                                                            | 31                 | 1                  | E           | 2             |
| 54337010 | 9000_SavorySweet | Crackers, woven wheat                                                                                               | 31                 | 3                  | C           | 4             |
| 54337020 | 9000_SavorySweet | Crackers, woven wheat, plain (Triscuit)                                                                             | 31                 | 3                  | C           | 4             |
| 54337030 | 9000_SavorySweet | Crackers, woven wheat, flavored (Triscuit)                                                                          | 31                 | 3                  | C           | 4             |
| 54338010 | 9000_SavorySweet | Crackers, wheat, plain (Wheat Thins)                                                                                | 31                 | 3                  | C           | 4             |
| 54338020 | 9000_SavorySweet | Crackers, wheat, flavored (Wheat Thins)                                                                             | 31                 | 3                  | C           | 4             |
| 54338000 | 9000_SavorySweet | Crackers, wheat                                                                                                     | 31                 | 3                  | C           | 4             |
| 54403120 | 9000_SavorySweet | Popcorn, caramel coated, with nuts                                                                                  | 31                 | 1.5                | D           | 4             |
| 13161600 | 9000_SavorySweet | Milk dessert bar, frozen, made from lowfat milk and low calorie sweetener                                           | 30                 | 3.5                | A           | 4             |
| 56116000 | 9000_SavorySweet | Noodles, chow mein                                                                                                  | 30                 | 2                  | D           | 1             |
| 91734000 | 9000_SavorySweet | Peanut butter, chocolate covered                                                                                    | 30                 | 0.5                | E           | 4             |
| 91770030 | 9000_SavorySweet | Dietetic or low calorie candy, chocolate covered                                                                    | 30                 | 0.5                | D           | 4             |
| 53420310 | 9000_SavorySweet | Wheat flour fritter, without syrup                                                                                  | 30                 | 1.5                | D           | 3             |
| 53440300 | 9000_SavorySweet | Strudel, berry                                                                                                      | 30                 | 3.5                | C           | 3             |
| 63203700 | 9000_SavorySweet | Blueberry pie filling                                                                                               | 30                 | 3                  | C           | 4             |
| 53451500 | 9000_SavorySweet | Turnover, guava                                                                                                     | 30                 | 3.5                | C           | 3             |
| 54304150 | 9000_SavorySweet | Crackers, cheese, whole grain                                                                                       | 30                 | 2.5                | D           | 4             |
| 55801010 | 9000_SavorySweet | Funnel cake with sugar and fruit                                                                                    | 30                 | 2                  | D           | 2             |
| 91734500 | 9000_SavorySweet | Peanut butter morsels                                                                                               | 29                 | 1                  | E           | 4             |
| 54102100 | 9000_SavorySweet | Graham crackers, reduced fat                                                                                        | 29                 | 2.5                | C           | 4             |
| 53116510 | 9000_SavorySweet | Cake or cupcake, pumpkin, with icing or filling                                                                     | 29                 | 1                  | E           | 2             |
| 53390100 | 9000_SavorySweet | Pie, tofu with fruit                                                                                                | 29                 | 2.5                | C           | 4             |
| 91718000 | 9000_SavorySweet | Honey-combed hard candy with peanut butter                                                                          | 29                 | 2                  | E           | 4             |
| 55801000 | 9000_SavorySweet | Funnel cake with sugar                                                                                              | 29                 | 2                  | D           | 2             |
| 91407100 | 9000_SavorySweet | Guava paste                                                                                                         | 29                 | 1.5                | D           | 3             |
| 54403001 | 9000_SavorySweet | Popcorn, NFS                                                                                                        | 28                 | 1.5                | E           | 4             |
| 54403051 | 9000_SavorySweet | Popcorn, microwave, NFS                                                                                             | 28                 | 1.5                | E           | 4             |
| 54403052 | 9000_SavorySweet | Popcorn, microwave, plain                                                                                           | 28                 | 1.5                | E           | 4             |
| 54403056 | 9000_SavorySweet | Popcorn, microwave, butter flavored                                                                                 | 28                 | 1.5                | E           | 4             |
| 91708020 | 9000_SavorySweet | Soft fruit confections                                                                                              | 28                 | 3                  | D           | 4             |
| 53104260 | 9000_SavorySweet | Cake or cupcake, carrot, with icing or filling                                                                      | 28                 | 1                  | E           | 2             |
| 91713040 | 9000_SavorySweet | Fudge, chocolate, with nuts                                                                                         | 28                 | 1                  | D           | 4             |
| 13210530 | 9000_SavorySweet | Pudding, tapioca, chocolate, made with milk                                                                         | 28                 | 3                  | C           | 2             |
| 13110310 | 9000_SavorySweet | Ice cream, no sugar added, NS as to flavor                                                                          | 28                 | 3                  | C           | 4             |
| 13110320 | 9000_SavorySweet | Ice cream, no sugar added, flavors other than chocolate                                                             | 28                 | 3                  | C           | 4             |
| 53452150 | 9000_SavorySweet | Pastry, Chinese, made with rice flour                                                                               | 28                 | 3                  | C           | 2             |
| 91550300 | 9000_SavorySweet | Pineapple custard, Puerto Rican style                                                                               | 28                 | 3.5                | C           | 2             |
| 53415100 | 9000_SavorySweet | Crisp, apple, apple dessert                                                                                         | 28                 | 4                  | C           | 3             |
| 91734100 | 9000_SavorySweet | Reese's Peanut Butter Cup                                                                                           | 28                 | 0.5                | E           | 4             |
| 91705310 | 9000_SavorySweet | Chocolate, sweet or dark, with almonds                                                                              | 28                 | 2.5                | E           | 4             |

| foodcode | levelInd         | Description                                                                                          | Food Compass Score | Health Star Rating | Nutri-Score | NOVA Category |
|----------|------------------|------------------------------------------------------------------------------------------------------|--------------------|--------------------|-------------|---------------|
| 58149160 | 9000_SavorySweet | Noodle pudding, with milk                                                                            | 28                 | 2.5                | C           | 1             |
| 41480000 | 9000_SavorySweet | Tofu, frozen dessert, flavors other than chocolate                                                   | 28                 | 2.5                | D           | 4             |
| 41410015 | 9000_SavorySweet | Soy chips                                                                                            | 28                 | 2.5                | C           | 4             |
| 54403058 | 9000_SavorySweet | Popcorn, microwave, cheese flavored                                                                  | 28                 | 1.5                | E           | 4             |
| 54403062 | 9000_SavorySweet | Popcorn, microwave, other flavored                                                                   | 28                 | 1.5                | E           | 4             |
| 53102700 | 9000_SavorySweet | Cake or cupcake, banana, with icing or filling                                                       | 27                 | 1                  | E           | 2             |
| 53310000 | 9000_SavorySweet | Pie, raspberry, one crust                                                                            | 27                 | 3.5                | C           | 3             |
| 91705040 | 9000_SavorySweet | Chocolate, milk, with nuts, not almond or peanuts                                                    | 27                 | 0.5                | E           | 4             |
| 53346000 | 9000_SavorySweet | Pie, peanut butter cream                                                                             | 27                 | 2                  | D           | 2             |
| 53124110 | 9000_SavorySweet | Cake or cupcake, zucchini                                                                            | 27                 | 1                  | E           | 2             |
| 53231400 | 9000_SavorySweet | Cookie, multigrain, high fiber                                                                       | 27                 | 1                  | E           | 4             |
| 53223100 | 9000_SavorySweet | Cookie, granola                                                                                      | 27                 | 1                  | E           | 4             |
| 54301100 | 9000_SavorySweet | Crackers, butter, reduced fat                                                                        | 27                 | 2                  | D           | 4             |
| 54338100 | 9000_SavorySweet | Crackers, wheat, reduced fat                                                                         | 27                 | 2                  | D           | 4             |
| 53441110 | 9000_SavorySweet | Baklava                                                                                              | 27                 | 1.5                | D           | 2             |
| 13110330 | 9000_SavorySweet | Ice cream, no sugar added, chocolate                                                                 | 26                 | 3.5                | B           | 4             |
| 91501070 | 9000_SavorySweet | Gelatin dessert with fruit and sour cream                                                            | 26                 | 4                  | C           | 3             |
| 53415120 | 9000_SavorySweet | Fritter, apple                                                                                       | 26                 | 2                  | D           | 3             |
| 58118110 | 9000_SavorySweet | Cornstarch coconut dessert, Puerto Rican style                                                       | 26                 | 1.5                | D           | 2             |
| 54408310 | 9000_SavorySweet | Pretzels, hard, peanut butter filled                                                                 | 26                 | 1.5                | D           | 4             |
| 32120200 | 9000_SavorySweet | Zabaglione                                                                                           | 26                 | 2.5                | C           | 2             |
| 63113030 | 9000_SavorySweet | Cherry pie filling                                                                                   | 26                 | 3.5                | C           | 3             |
| 13140580 | 9000_SavorySweet | Light ice cream, no sugar added, cone, chocolate                                                     | 26                 | 3                  | B           | 4             |
| 53100050 | 9000_SavorySweet | Cake batter, raw, chocolate                                                                          | 26                 | 2                  | D           | 3             |
| 54402200 | 9000_SavorySweet | Snack mix                                                                                            | 25                 | 2                  | D           | 4             |
| 53102200 | 9000_SavorySweet | Cake or cupcake, applesauce, with icing or filling                                                   | 25                 | 1                  | E           | 2             |
| 53117200 | 9000_SavorySweet | Cake or cupcake, spice, with icing or filling                                                        | 25                 | 1                  | E           | 2             |
| 53303000 | 9000_SavorySweet | Pie, blackberry, two crust                                                                           | 25                 | 3.5                | C           | 3             |
| 54103000 | 9000_SavorySweet | Crackers, breakfast biscuit                                                                          | 25                 | 2.5                | D           | 4             |
| 91734450 | 9000_SavorySweet | Reese's Crispy Crunchy Bar                                                                           | 25                 | 1                  | E           | 4             |
| 91718050 | 9000_SavorySweet | Honey-combed hard candy with peanut butter, chocolate covered                                        | 25                 | 1                  | E           | 4             |
| 53452450 | 9000_SavorySweet | Cheese pastry puffs                                                                                  | 25                 | 2                  | D           | 3             |
| 91726150 | 9000_SavorySweet | MARS Almond Bar                                                                                      | 25                 | 1                  | E           | 4             |
| 53303510 | 9000_SavorySweet | Pie, berry, not blackberry, blueberry, boysenberry, huckleberry, raspberry, or strawberry; one crust | 25                 | 3                  | C           | 3             |
| 53415500 | 9000_SavorySweet | Crisp, peach                                                                                         | 25                 | 3                  | D           | 3             |
| 54102015 | 9000_SavorySweet | Graham crackers (Teddy Grahams)                                                                      | 25                 | 2                  | D           | 4             |
| 91733000 | 9000_SavorySweet | Peanut brittle                                                                                       | 25                 | 2                  | E           | 4             |
| 53105275 | 9000_SavorySweet | Cake or cupcake, chocolate, devil's food or fudge, without icing or filling                          | 25                 | 2                  | D           | 3             |
| 54102010 | 9000_SavorySweet | Graham crackers                                                                                      | 25                 | 2                  | D           | 4             |
| 13250100 | 9000_SavorySweet | Mousse, not chocolate                                                                                | 25                 | 3                  | D           | 2             |
| 91560100 | 9000_SavorySweet | Haupia                                                                                               | 25                 | 1.5                | D           | 2             |
| 91361020 | 9000_SavorySweet | Fruit sauce                                                                                          | 25                 | 3                  | D           | 2             |
| 13210300 | 9000_SavorySweet | Custard                                                                                              | 25                 | 3.5                | B           | 2             |
| 91705500 | 9000_SavorySweet | Mexican chocolate, tablet                                                                            | 25                 | 1.5                | D           | 4             |
| 13250000 | 9000_SavorySweet | Mousse, chocolate                                                                                    | 24                 | 2                  | D           | 3             |
| 53441210 | 9000_SavorySweet | Basbousa                                                                                             | 24                 | 2                  | D           | 2             |
| 13161630 | 9000_SavorySweet | Light ice cream, bar or stick, with low-calorie sweetener, chocolate coated                          | 24                 | 3                  | C           | 4             |
| 13210110 | 9000_SavorySweet | Pudding, bread                                                                                       | 24                 | 3                  | C           | 3             |
| 54403006 | 9000_SavorySweet | Popcorn, movie theater, unbuttered                                                                   | 24                 | 0.5                | E           | 4             |
| 13140110 | 9000_SavorySweet | Light ice cream, bar or stick, chocolate covered, with nuts                                          | 24                 | 1.5                | D           | 4             |
| 71201210 | 9000_SavorySweet | Potato chips, restructured, fat free                                                                 | 24                 | 3                  | D           | 4             |
| 91705060 | 9000_SavorySweet | Milk chocolate candy, with almonds                                                                   | 24                 | 0.5                | E           | 4             |
| 53452170 | 9000_SavorySweet | Pastry, cookie type, fried                                                                           | 24                 | 2                  | D           | 2             |
| 13140575 | 9000_SavorySweet | Light ice cream, no sugar added, cone, flavors other than chocolate                                  | 24                 | 3.5                | C           | 4             |
| 53344300 | 9000_SavorySweet | Dessert pizza                                                                                        | 24                 | 3.5                | C           | 3             |
| 53344200 | 9000_SavorySweet | Mixed fruit tart filled with custard or cream cheese                                                 | 24                 | 3                  | C           | 2             |
| 13140570 | 9000_SavorySweet | Light ice cream, no sugar added, cone, NS as to flavor                                               | 23                 | 3                  | C           | 4             |
| 91705050 | 9000_SavorySweet | Milk chocolate candy, with fruit and nuts                                                            | 23                 | 0.5                | E           | 4             |
| 91731060 | 9000_SavorySweet | M&M's Peanut Butter Chocolate Candies                                                                | 23                 | 0.5                | E           | 4             |
| 11460420 | 9000_SavorySweet | Yogurt, frozen, NS as to flavor, whole milk                                                          | 23                 | 3                  | C           | 4             |
| 91407120 | 9000_SavorySweet | Sweet potato paste                                                                                   | 23                 | 1.5                | D           | 2             |
| 41480010 | 9000_SavorySweet | Tofu, frozen dessert, chocolate                                                                      | 23                 | 3                  | C           | 4             |
| 13241000 | 9000_SavorySweet | Pudding, with fruit and vanilla wafers                                                               | 23                 | 3                  | C           | 3             |
| 13120130 | 9000_SavorySweet | Ice cream bar or stick, rich ice cream, chocolate covered, with nuts                                 | 23                 | 1.5                | D           | 4             |
| 11460000 | 9000_SavorySweet | Yogurt, frozen, flavors other than chocolate, NS as to type of milk                                  | 23                 | 3                  | C           | 4             |
| 11460440 | 9000_SavorySweet | Yogurt, frozen, flavors other than chocolate, whole milk                                             | 23                 | 3                  | C           | 4             |
| 53115450 | 9000_SavorySweet | Cake or cupcake, peanut butter                                                                       | 23                 | 1                  | E           | 3             |
| 53452120 | 9000_SavorySweet | Pastry, made with bean or lotus seed paste filling, baked                                            | 23                 | 2.5                | C           | 2             |
| 53206020 | 9000_SavorySweet | Cookie, chocolate chip, made from home recipe or purchased at a bakery                               | 23                 | 0.5                | E           | 2             |
| 53410300 | 9000_SavorySweet | Cobbler, berry                                                                                       | 23                 | 3                  | C           | 3             |
| 91301060 | 9000_SavorySweet | Maple syrup                                                                                          | 23                 | 1.5                | D           | 2             |
| 53312000 | 9000_SavorySweet | Pie, strawberry, one crust                                                                           | 23                 | 3.5                | C           | 3             |
| 53260200 | 9000_SavorySweet | Cookie, oatmeal, sugar free                                                                          | 23                 | 2                  | D           | 4             |
| 53415600 | 9000_SavorySweet | Crisp, rhubarb                                                                                       | 23                 | 2.5                | D           | 3             |
| 91708150 | 9000_SavorySweet | Yogurt covered fruit snacks candy, with added vitamin C                                              | 22                 | 1                  | D           | 4             |
| 54102050 | 9000_SavorySweet | Crackers, oatmeal                                                                                    | 22                 | 2.5                | D           | 4             |
| 54339000 | 9000_SavorySweet | Crackers, corn                                                                                       | 22                 | 2.5                | D           | 4             |
| 53115320 | 9000_SavorySweet | Cake or cupcake, nut, with icing or filling                                                          | 22                 | 1                  | E           | 3             |
| 13210450 | 9000_SavorySweet | Pudding, rice flour, and nuts                                                                        | 22                 | 3                  | C           | 1             |
| 91501080 | 9000_SavorySweet | Gelatin dessert with fruit and cream cheese                                                          | 22                 | 4                  | B           | 3             |
| 54326000 | 9000_SavorySweet | Crackers, multigrain                                                                                 | 22                 | 1.5                | D           | 4             |
| 91501040 | 9000_SavorySweet | Gelatin dessert with fruit and whipped cream                                                         | 22                 | 4                  | C           | 3             |
| 54401170 | 9000_SavorySweet | Tortilla chips, low fat, unsalted                                                                    | 22                 | 4                  | A           | 4             |
| 53260500 | 9000_SavorySweet | Cookie, sugar wafer, sugar free                                                                      | 22                 | 4                  | C           | 4             |
| 91703080 | 9000_SavorySweet | Caramel, all flavors, sugar free                                                                     | 22                 | 2.5                | D           | 4             |
| 91550100 | 9000_SavorySweet | Coconut cream cake, Puerto Rican style                                                               | 22                 | 1                  | E           | 2             |
| 13142000 | 9000_SavorySweet | Milk dessert bar or stick, frozen, with coconut                                                      | 22                 | 2.5                | C           | 4             |
| 53260600 | 9000_SavorySweet | Cookie, peanut butter, sugar free                                                                    | 22                 | 2                  | D           | 4             |
| 91734400 | 9000_SavorySweet | Reese's Fast Break                                                                                   | 22                 | 0.5                | E           | 4             |
| 91304090 | 9000_SavorySweet | Topping, chocolate flavored hazelnut spread                                                          | 22                 | 0.5                | E           | 4             |
| 13220120 | 9000_SavorySweet | Pudding, chocolate, prepared from dry mix, milk added                                                | 22                 | 3                  | C           | 3             |
| 91718110 | 9000_SavorySweet | Butterfinger Crisp                                                                                   | 22                 | 0.5                | E           | 4             |
| 53452420 | 9000_SavorySweet | Pastry, puff, custard or cream filled, iced or not iced                                              | 21                 | 2                  | D           | 3             |
| 91703030 | 9000_SavorySweet | Caramel, with nuts                                                                                   | 21                 | 1                  | E           | 4             |
| 13210610 | 9000_SavorySweet | Pudding, coconut                                                                                     | 21                 | 3                  | C           | 3             |
| 91705300 | 9000_SavorySweet | Chocolate, sweet or dark                                                                             | 21                 | 0.5                | E           | 4             |
| 53347000 | 9000_SavorySweet | Pie, pumpkin                                                                                         | 21                 | 2.5                | C           | 4             |
| 53347070 | 9000_SavorySweet | Pie, pumpkin, individual size or tart                                                                | 21                 | 2.5                | C           | 4             |
| 54401085 | 9000_SavorySweet | Tortilla chips, flavored                                                                             | 21                 | 2.5                | D           | 4             |
| 54401110 | 9000_SavorySweet | Tortilla chips, nacho cheese flavor (Doritos)                                                        | 21                 | 2.5                | D           | 4             |
| 54401112 | 9000_SavorySweet | Tortilla chips, other flavors (Doritos)                                                              | 21                 | 2.5                | D           | 4             |
| 91713020 | 9000_SavorySweet | Fudge, chocolate, chocolate-coated, with nuts                                                        | 21                 | 0.5                | E           | 4             |
| 91713090 | 9000_SavorySweet | Fudge, divinity                                                                                      | 21                 | 1                  | D           | 4             |
| 13130340 | 9000_SavorySweet | Light ice cream, no sugar added, chocolate                                                           | 21                 | 3                  | C           | 4             |

| foodcode | levelInd         | Description                                                                                             | Food Compass Score | Health Star Rating | Nutri-Score | NOVA Category |
|----------|------------------|---------------------------------------------------------------------------------------------------------|--------------------|--------------------|-------------|---------------|
| 13160150 | 9000_SavorySweet | Fat free ice cream, no sugar added, chocolate                                                           | 21                 | 3                  | C           | 4             |
| 91703250 | 9000_SavorySweet | TWIX Chocolate Fudge Cookie Bars                                                                        | 21                 | 1                  | D           | 4             |
| 54401055 | 9000_SavorySweet | Cheese flavored corn snacks                                                                             | 21                 | 1.5                | E           | 4             |
| 54401081 | 9000_SavorySweet | Cheese flavored corn snacks (Cheetos)                                                                   | 21                 | 1.5                | E           | 4             |
| 54328000 | 9000_SavorySweet | Crackers, sandwich                                                                                      | 21                 | 1.5                | D           | 4             |
| 54328100 | 9000_SavorySweet | Crackers, sandwich, peanut butter filled                                                                | 21                 | 1.5                | D           | 4             |
| 91705200 | 9000_SavorySweet | Chocolate, semi-sweet morsel                                                                            | 21                 | 0.5                | E           | 4             |
| 53410800 | 9000_SavorySweet | Cobbler, peach                                                                                          | 20                 | 3.5                | C           | 3             |
| 13230140 | 9000_SavorySweet | Pudding, ready-to-eat, low calorie, containing artificial sweetener, chocolate                          | 20                 | 3                  | C           | 4             |
| 13210250 | 9000_SavorySweet | Pudding, chocolate, low calorie, containing artificial sweetener, NS as to from dry mix or ready-to-eat | 20                 | 3                  | C           | 4             |
| 91713050 | 9000_SavorySweet | Fudge, peanut butter                                                                                    | 20                 | 0.5                | E           | 4             |
| 53347600 | 9000_SavorySweet | Pie, squash                                                                                             | 20                 | 3                  | C           | 2             |
| 13140900 | 9000_SavorySweet | Light ice cream, fudgesicle                                                                             | 20                 | 3                  | C           | 4             |
| 53115100 | 9000_SavorySweet | Cake or cupcake, marble, without icing or filling                                                       | 20                 | 1.5                | D           | 3             |
| 11460250 | 9000_SavorySweet | Yogurt, frozen, flavors other than chocolate, with sorbet or sorbet-coated                              | 20                 | 3                  | C           | 4             |
| 53360000 | 9000_SavorySweet | Pie, sweet potato                                                                                       | 20                 | 2.5                | D           | 2             |
| 53310050 | 9000_SavorySweet | Pie, raspberry, two crust                                                                               | 20                 | 3                  | C           | 3             |
| 13210270 | 9000_SavorySweet | Custard, Puerto Rican style                                                                             | 20                 | 3                  | C           | 2             |
| 13130630 | 9000_SavorySweet | Light ice cream, soft serve cone, chocolate                                                             | 20                 | 3                  | C           | 4             |
| 63420100 | 9000_SavorySweet | Fruit juice bar, frozen, orange flavor                                                                  | 20                 | 4                  | C           | 4             |
| 63430110 | 9000_SavorySweet | Sorbet, fruit, citrus flavor                                                                            | 20                 | 4                  | C           | 4             |
| 91402000 | 9000_SavorySweet | Jam, preserve, all flavors                                                                              | 20                 | 2.5                | D           | 3             |
| 53314000 | 9000_SavorySweet | Pie, strawberry, individual size or tart                                                                | 20                 | 3                  | C           | 3             |
| 11459990 | 9000_SavorySweet | Yogurt, frozen, NS as to flavor, NS as to type of milk                                                  | 20                 | 3                  | B           | 4             |
| 11460150 | 9000_SavorySweet | Yogurt, frozen, NS as to flavor, lowfat milk                                                            | 20                 | 3                  | B           | 4             |
| 13252100 | 9000_SavorySweet | Coconut custard, Puerto Rican style                                                                     | 20                 | 1.5                | D           | 2             |
| 53110000 | 9000_SavorySweet | Cake, fruit cake, light or dark, holiday type cake                                                      | 20                 | 2.5                | C           | 4             |
| 54402700 | 9000_SavorySweet | Pita chips                                                                                              | 19                 | 2.5                | D           | 4             |
| 13252500 | 9000_SavorySweet | Barfi or Burfi, Indian dessert, made from milk and/or cream and/or Ricotta cheese                       | 19                 | 1.5                | D           | 1             |
| 91708160 | 9000_SavorySweet | Yogurt covered fruit snacks candy rolls, with high vitamin C                                            | 19                 | 2                  | D           | 4             |
| 51184100 | 9000_SavorySweet | Breadsticks, hard, reduced sodium                                                                       | 19                 | 4                  | A           | 4             |
| 11460170 | 9000_SavorySweet | Yogurt, frozen, flavors other than chocolate, lowfat milk                                               | 19                 | 3                  | B           | 4             |
| 53307050 | 9000_SavorySweet | Pie, peach, one crust                                                                                   | 19                 | 3                  | C           | 3             |
| 58123120 | 9000_SavorySweet | Sweet bread dough, filled with bean paste, meatless, steamed                                            | 19                 | 3                  | B           | 2             |
| 91713100 | 9000_SavorySweet | Fudge, brown sugar, peneuche                                                                            | 19                 | 0.5                | D           | 4             |
| 91735000 | 9000_SavorySweet | Pralines                                                                                                | 19                 | 0.5                | D           | 4             |
| 53304050 | 9000_SavorySweet | Pie, blueberry, one crust                                                                               | 19                 | 3                  | C           | 3             |
| 91304250 | 9000_SavorySweet | Topping, milk chocolate with cereal                                                                     | 19                 | 0.5                | E           | 4             |
| 11461250 | 9000_SavorySweet | Yogurt, frozen, cone, chocolate                                                                         | 19                 | 2                  | C           | 4             |
| 91703050 | 9000_SavorySweet | Caramel with nuts and cereal, chocolate covered                                                         | 19                 | 0.5                | E           | 4             |
| 54401065 | 9000_SavorySweet | Cheese flavored corn snacks, reduced fat                                                                | 19                 | 2                  | D           | 4             |
| 53341070 | 9000_SavorySweet | Pie, banana cream, individual size or tart                                                              | 19                 | 2.5                | C           | 2             |
| 13210710 | 9000_SavorySweet | Pudding, cornmeal, milk, and molasses                                                                   | 19                 | 3                  | C           | 1             |
| 63420200 | 9000_SavorySweet | Fruit juice bar, frozen, sweetened with low calorie sweetener, flavors other than orange                | 19                 | 4.5                | B           | 4             |
| 13210500 | 9000_SavorySweet | Pudding, tapioca, made from home recipe, made with milk                                                 | 19                 | 3                  | C           | 1             |
| 54401075 | 9000_SavorySweet | Tortilla chips, plain                                                                                   | 19                 | 3.5                | B           | 4             |
| 13120400 | 9000_SavorySweet | Ice cream bar or stick with fruit                                                                       | 19                 | 3                  | C           | 4             |
| 53430750 | 9000_SavorySweet | Tamale, sweet, with fruit                                                                               | 19                 | 3.5                | C           | 2             |
| 54420220 | 9000_SavorySweet | Snack mix, plain (Chex Mix)                                                                             | 19                 | 2.5                | C           | 4             |
| 53410900 | 9000_SavorySweet | Cobbler, rhubarb                                                                                        | 19                 | 2.5                | D           | 3             |
| 91736000 | 9000_SavorySweet | Pineapple candy, Puerto Rican style                                                                     | 19                 | 1.5                | D           | 4             |
| 53260300 | 9000_SavorySweet | Cookie, sandwich, sugar free                                                                            | 19                 | 2.5                | C           | 4             |
| 53410850 | 9000_SavorySweet | Cobbler, pear                                                                                           | 19                 | 3.5                | C           | 3             |
| 91304300 | 9000_SavorySweet | Topping, chocolate, hard coating                                                                        | 18                 | 0.5                | E           | 4             |
| 54403160 | 9000_SavorySweet | Popcorn, chocolate coated                                                                               | 18                 | 1.5                | E           | 4             |
| 53118500 | 9000_SavorySweet | Cake, torte                                                                                             | 18                 | 2                  | D           | 3             |
| 54403005 | 9000_SavorySweet | Popcorn, movie theater, with added butter                                                               | 18                 | 0.5                | E           | 4             |
| 51168000 | 9000_SavorySweet | Bread, Spanish coffee                                                                                   | 18                 | 3.5                | B           | 4             |
| 53390000 | 9000_SavorySweet | Pie, shoo-fly                                                                                           | 18                 | 1.5                | D           | 2             |
| 91739010 | 9000_SavorySweet | Raisins, chocolate covered                                                                              | 18                 | 0.5                | E           | 4             |
| 91739600 | 9000_SavorySweet | Raisins, yogurt covered                                                                                 | 18                 | 1.5                | E           | 4             |
| 91705410 | 9000_SavorySweet | Chocolate, white, with almonds                                                                          | 18                 | 0.5                | E           | 4             |
| 91713080 | 9000_SavorySweet | Fudge, vanilla, with nuts                                                                               | 18                 | 0.5                | D           | 4             |
| 53302070 | 9000_SavorySweet | Pie, apricot, individual size or tart                                                                   | 18                 | 2.5                | C           | 4             |
| 53302000 | 9000_SavorySweet | Pie, apricot, two crust                                                                                 | 18                 | 3                  | C           | 3             |
| 53300170 | 9000_SavorySweet | Pie, individual size or tart, NFS                                                                       | 18                 | 2.5                | C           | 4             |
| 53301070 | 9000_SavorySweet | Pie, apple, individual size or tart                                                                     | 18                 | 2.5                | C           | 4             |
| 53200100 | 9000_SavorySweet | Cookie, batter or dough, raw                                                                            | 18                 | 1                  | E           | 2             |
| 53343070 | 9000_SavorySweet | Pie, coconut cream, individual size or tart                                                             | 17                 | 3                  | C           | 2             |
| 91734200 | 9000_SavorySweet | Reese's Pieces                                                                                          | 17                 | 0.5                | E           | 4             |
| 53308070 | 9000_SavorySweet | Pie, pineapple, individual size or tart                                                                 | 17                 | 2.5                | C           | 4             |
| 53203500 | 9000_SavorySweet | Cookie, biscotti                                                                                        | 17                 | 2                  | D           | 2             |
| 54402610 | 9000_SavorySweet | Potato chips, restructured, multigrain                                                                  | 17                 | 2.5                | D           | 4             |
| 53440700 | 9000_SavorySweet | Strudel, peach                                                                                          | 17                 | 3.5                | C           | 4             |
| 91715100 | 9000_SavorySweet | SNICKERS Bar                                                                                            | 17                 | 0.5                | E           | 4             |
| 53347100 | 9000_SavorySweet | Pie, raspberry cream                                                                                    | 17                 | 3                  | C           | 3             |
| 54336100 | 9000_SavorySweet | Crackers, wonton                                                                                        | 17                 | 2                  | D           | 4             |
| 53224250 | 9000_SavorySweet | Cookie, lemon bar                                                                                       | 17                 | 1.5                | D           | 3             |
| 53303500 | 9000_SavorySweet | Pie, berry, not blackberry, blueberry, boysenberry, huckleberry, raspberry, or strawberry; two crust    | 17                 | 3                  | C           | 3             |
| 13210180 | 9000_SavorySweet | Pudding, Mexican bread                                                                                  | 17                 | 2                  | D           | 2             |
| 51161050 | 9000_SavorySweet | Roll, sweet, frosted                                                                                    | 17                 | 2                  | D           | 4             |
| 91726000 | 9000_SavorySweet | Nougat, plain                                                                                           | 17                 | 2                  | C           | 4             |
| 53348000 | 9000_SavorySweet | Pie, strawberry cream                                                                                   | 17                 | 3                  | C           | 3             |
| 53451750 | 9000_SavorySweet | Turnover, pumpkin                                                                                       | 17                 | 3                  | C           | 4             |
| 91104100 | 9000_SavorySweet | Sugar, cinnamon                                                                                         | 17                 | 1                  | C           | 2             |
| 54319005 | 9000_SavorySweet | Crackers, rice and nuts                                                                                 | 17                 | 3.5                | B           | 4             |
| 53410500 | 9000_SavorySweet | Cobbler, cherry                                                                                         | 17                 | 2.5                | C           | 3             |
| 13110130 | 9000_SavorySweet | Ice cream, rich, chocolate                                                                              | 17                 | 1.5                | D           | 4             |
| 53440800 | 9000_SavorySweet | Strudel, cheese and fruit                                                                               | 17                 | 3                  | C           | 3             |
| 54301010 | 9000_SavorySweet | Crackers, butter, plain                                                                                 | 17                 | 1.5                | D           | 4             |
| 54301020 | 9000_SavorySweet | Crackers, butter, flavored                                                                              | 17                 | 1.5                | D           | 4             |
| 54301030 | 9000_SavorySweet | Crackers, butter (Ritz)                                                                                 | 17                 | 1.5                | D           | 4             |
| 54001000 | 9000_SavorySweet | Crackers, NFS                                                                                           | 17                 | 1.5                | D           | 4             |
| 53452200 | 9000_SavorySweet | Pastry, Italian, with cheese                                                                            | 17                 | 3                  | C           | 3             |
| 53385500 | 9000_SavorySweet | Pie, oatmeal                                                                                            | 17                 | 1.5                | D           | 3             |
| 54401111 | 9000_SavorySweet | Tortilla chips, cool ranch flavor (Doritos)                                                             | 17                 | 3                  | C           | 4             |
| 91703600 | 9000_SavorySweet | Espresso coffee beans, chocolate-covered                                                                | 17                 | 0.5                | E           | 4             |
| 13210750 | 9000_SavorySweet | Pudding, pumpkin                                                                                        | 16                 | 3                  | C           | 4             |
| 53311050 | 9000_SavorySweet | Pie, rhubarb, one crust                                                                                 | 16                 | 3                  | C           | 3             |
| 91718300 | 9000_SavorySweet | Ladoo, round ball, Asian-Indian dessert                                                                 | 16                 | 2.5                | D           | 4             |
| 58118210 | 9000_SavorySweet | Cornmeal coconut dessert, Puerto Rican style                                                            | 16                 | 1                  | D           | 2             |
| 53309000 | 9000_SavorySweet | Pie, raisin, two crust                                                                                  | 16                 | 2.5                | C           | 2             |
| 53309070 | 9000_SavorySweet | Pie, raisin, individual size or tart                                                                    | 16                 | 2.5                | C           | 2             |
| 91302010 | 9000_SavorySweet | Honey                                                                                                   | 16                 | 1                  | D           | 2             |

| foodcode | levelInd         | Description                                                                                                        | Food Compass Score | Health Star Rating | Nutri-Score | NOVA Category |
|----------|------------------|--------------------------------------------------------------------------------------------------------------------|--------------------|--------------------|-------------|---------------|
| 13210820 | 9000_SavorySweet | Fresh corn custard, Puerto Rican style                                                                             | 16                 | 1                  | E           | 2             |
| 53304070 | 9000_SavorySweet | Pie, blueberry, individual size or tart                                                                            | 16                 | 2.5                | C           | 3             |
| 53610170 | 9000_SavorySweet | Coffee cake, crumb or quick-bread type, with fruit                                                                 | 16                 | 1.5                | D           | 2             |
| 53610200 | 9000_SavorySweet | Coffee cake, crumb or quick-bread type, cheese-filled                                                              | 16                 | 1.5                | D           | 2             |
| 53303570 | 9000_SavorySweet | Pie, berry, not blackberry, blueberry, boysenberry, huckleberry, raspberry, or strawberry, individual size or tart | 16                 | 2.5                | C           | 3             |
| 53305010 | 9000_SavorySweet | Pie, cherry, one crust                                                                                             | 16                 | 2.5                | C           | 3             |
| 53610100 | 9000_SavorySweet | Coffee cake, crumb or quick-bread type                                                                             | 16                 | 1.5                | D           | 2             |
| 53121275 | 9000_SavorySweet | Cake or cupcake, yellow, without icing or filling                                                                  | 16                 | 1.5                | D           | 3             |
| 13120120 | 9000_SavorySweet | Ice cream bar or stick, rich chocolate ice cream, thick chocolate covering                                         | 16                 | 1                  | D           | 4             |
| 53100070 | 9000_SavorySweet | Cake batter, raw, not chocolate                                                                                    | 16                 | 2                  | D           | 3             |
| 13210150 | 9000_SavorySweet | Bread pudding made with evaporated milk and rum                                                                    | 16                 | 2                  | D           | 3             |
| 53235000 | 9000_SavorySweet | Cookie, peanut butter sandwich                                                                                     | 16                 | 1.5                | D           | 4             |
| 53345000 | 9000_SavorySweet | Pie, lemon cream                                                                                                   | 16                 | 2                  | D           | 3             |
| 53410100 | 9000_SavorySweet | Cobbler, apple                                                                                                     | 15                 | 3                  | C           | 3             |
| 53113000 | 9000_SavorySweet | Cake, jelly roll                                                                                                   | 15                 | 1.5                | D           | 3             |
| 54328110 | 9000_SavorySweet | Crackers, sandwich, reduced fat, peanut butter filled                                                              | 15                 | 2                  | D           | 4             |
| 53313000 | 9000_SavorySweet | Pie, strawberry-rhubarb, two crust                                                                                 | 15                 | 3                  | C           | 3             |
| 53342070 | 9000_SavorySweet | Pie, chocolate cream, individual size or tart                                                                      | 15                 | 2                  | C           | 2             |
| 61113500 | 9000_SavorySweet | Lemon pie filling                                                                                                  | 15                 | 1.5                | D           | 3             |
| 53115410 | 9000_SavorySweet | Cake or cupcake, oatmeal                                                                                           | 15                 | 1.5                | D           | 3             |
| 91108010 | 9000_SavorySweet | Sugar substitute, stevia, liquid                                                                                   | 15                 | 3.5                | B           | 2             |
| 13210190 | 9000_SavorySweet | Pudding, Mexican bread, low fat                                                                                    | 15                 | 2                  | D           | 2             |
| 53109300 | 9000_SavorySweet | Cake, Dobos Torte                                                                                                  | 15                 | 1                  | E           | 3             |
| 91760200 | 9000_SavorySweet | Toffee, chocolate-coated, with nuts                                                                                | 15                 | 0.5                | E           | 4             |
| 13120140 | 9000_SavorySweet | Ice cream bar or stick, chocolate ice cream, chocolate covered                                                     | 15                 | 1.5                | D           | 4             |
| 53452400 | 9000_SavorySweet | Pastry, puff                                                                                                       | 14                 | 2                  | D           | 4             |
| 13210520 | 9000_SavorySweet | Pudding, tapioca, made from dry mix, made with milk                                                                | 14                 | 3                  | C           | 1             |
| 53105500 | 9000_SavorySweet | Cake, chocolate, with icing, diet                                                                                  | 14                 | 2.5                | D           | 4             |
| 53308500 | 9000_SavorySweet | Pie, prune, one crust                                                                                              | 14                 | 2                  | D           | 3             |
| 53116570 | 9000_SavorySweet | Cake, Ravani                                                                                                       | 14                 | 2                  | D           | 3             |
| 91705010 | 9000_SavorySweet | Milk chocolate candy, plain                                                                                        | 14                 | 0.5                | E           | 4             |
| 91401000 | 9000_SavorySweet | Jelly, all flavors                                                                                                 | 14                 | 2.5                | D           | 3             |
| 13210160 | 9000_SavorySweet | Diplomat pudding, Puerto Rican style                                                                               | 14                 | 1.5                | D           | 2             |
| 13120100 | 9000_SavorySweet | Ice cream bar or stick, chocolate covered                                                                          | 14                 | 1.5                | D           | 4             |
| 53366000 | 9000_SavorySweet | Pie, yogurt, frozen                                                                                                | 14                 | 2                  | D           | 4             |
| 54404020 | 9000_SavorySweet | Popcorn chips, sweet flavors                                                                                       | 14                 | 3.5                | B           | 4             |
| 53385000 | 9000_SavorySweet | Pie, pecan                                                                                                         | 14                 | 2                  | D           | 4             |
| 53385070 | 9000_SavorySweet | Pie, pecan, individual size or tart                                                                                | 14                 | 2                  | D           | 4             |
| 91705020 | 9000_SavorySweet | Milk chocolate candy, with cereal                                                                                  | 14                 | 0.5                | E           | 4             |
| 91705420 | 9000_SavorySweet | Chocolate, white, with cereal                                                                                      | 14                 | 0.5                | E           | 4             |
| 13110110 | 9000_SavorySweet | Ice cream, regular, chocolate                                                                                      | 14                 | 2                  | D           | 4             |
| 54201010 | 9000_SavorySweet | Crackers, matzo, reduced sodium                                                                                    | 14                 | 4                  | A           | 4             |
| 54307000 | 9000_SavorySweet | Crackers, matzo                                                                                                    | 14                 | 4                  | A           | 4             |
| 53105270 | 9000_SavorySweet | Cake or cupcake, chocolate, devil's food or fudge, with icing or filling                                           | 14                 | 1.5                | D           | 4             |
| 54328105 | 9000_SavorySweet | Crackers, sandwich, peanut butter filled (Ritz)                                                                    | 14                 | 1.5                | D           | 4             |
| 53234000 | 9000_SavorySweet | Cookie, peanut butter                                                                                              | 14                 | 1                  | E           | 4             |
| 53116600 | 9000_SavorySweet | Cake, rice flour, without icing or filling                                                                         | 14                 | 2                  | D           | 2             |
| 53345070 | 9000_SavorySweet | Pie, lemon cream, individual size or tart                                                                          | 14                 | 2                  | D           | 3             |
| 32120100 | 9000_SavorySweet | Egg dessert, Puerto Rican style                                                                                    | 14                 | 1.5                | D           | 1             |
| 53120275 | 9000_SavorySweet | Cake or cupcake, white, without icing or filling                                                                   | 14                 | 1.5                | D           | 3             |
| 53410200 | 9000_SavorySweet | Cobbler, apricot                                                                                                   | 14                 | 3.5                | C           | 4             |
| 53450300 | 9000_SavorySweet | Turnover or dumpling, berry                                                                                        | 13                 | 2                  | D           | 3             |
| 91718200 | 9000_SavorySweet | Chocolate-flavored sprinkles                                                                                       | 13                 | 0.5                | E           | 4             |
| 54328210 | 9000_SavorySweet | Crackers, sandwich, cheese filled (Ritz)                                                                           | 13                 | 1.5                | D           | 4             |
| 91301090 | 9000_SavorySweet | Sorghum syrup                                                                                                      | 13                 | 1                  | D           | 4             |
| 53307070 | 9000_SavorySweet | Pie, peach, individual size or tart                                                                                | 13                 | 3                  | D           | 3             |
| 53301500 | 9000_SavorySweet | Pie, apple, one crust                                                                                              | 13                 | 3                  | D           | 3             |
| 91703300 | 9000_SavorySweet | TWIX Peanut Butter Cookie Bars                                                                                     | 13                 | 0.5                | E           | 4             |
| 13127010 | 9000_SavorySweet | Dippin' Dots, flash frozen ice cream snacks, chocolate                                                             | 13                 | 2                  | D           | 4             |
| 53100100 | 9000_SavorySweet | Cake or cupcake, NS as to type                                                                                     | 13                 | 1.5                | D           | 4             |
| 53452130 | 9000_SavorySweet | Pastry, made with bean paste and salted egg yolk filling, baked                                                    | 13                 | 1.5                | D           | 2             |
| 54406010 | 9000_SavorySweet | Onion flavored rings                                                                                               | 13                 | 1.5                | D           | 4             |
| 91760500 | 9000_SavorySweet | Truffles                                                                                                           | 13                 | 0.5                | E           | 4             |
| 53307500 | 9000_SavorySweet | Pie, pear, two crust                                                                                               | 13                 | 3                  | C           | 3             |
| 53344000 | 9000_SavorySweet | Pie, custard                                                                                                       | 13                 | 3                  | C           | 4             |
| 53306070 | 9000_SavorySweet | Pie, mince, individual size or tart                                                                                | 13                 | 2                  | D           | 2             |
| 91703150 | 9000_SavorySweet | Toblerone, milk chocolate with honey and almond nougat                                                             | 13                 | 0.5                | E           | 4             |
| 53220040 | 9000_SavorySweet | Cookie, fig bar, fat free                                                                                          | 13                 | 2                  | D           | 4             |
| 53220000 | 9000_SavorySweet | Cookie, fruit-filled bar                                                                                           | 13                 | 2                  | D           | 4             |
| 53220010 | 9000_SavorySweet | Cookie, fruit-filled bar, fat free                                                                                 | 13                 | 2                  | D           | 4             |
| 53220030 | 9000_SavorySweet | Cookie, fig bar                                                                                                    | 13                 | 2                  | D           | 4             |
| 13120110 | 9000_SavorySweet | Ice cream bar or stick, chocolate or caramel covered, with nuts                                                    | 13                 | 1                  | E           | 4             |
| 53311000 | 9000_SavorySweet | Pie, rhubarb, two crust                                                                                            | 13                 | 3                  | C           | 3             |
| 91802000 | 9000_SavorySweet | Chewing gum, sugar free                                                                                            | 13                 | 3.5                | B           | 4             |
| 53453170 | 9000_SavorySweet | Empanada, Mexican turnover, pumpkin                                                                                | 13                 | 3                  | C           | 2             |
| 53234100 | 9000_SavorySweet | Cookie, peanut butter, with chocolate                                                                              | 13                 | 1                  | E           | 4             |
| 13110210 | 9000_SavorySweet | Ice cream, soft serve, chocolate                                                                                   | 13                 | 2                  | D           | 4             |
| 91715000 | 9000_SavorySweet | Fudge, caramel and nut, chocolate-coated candy                                                                     | 13                 | 0.5                | E           | 4             |
| 54401095 | 9000_SavorySweet | Tortilla chips, popped                                                                                             | 12                 | 3.5                | C           | 4             |
| 54404000 | 9000_SavorySweet | Popcorn chips, plain                                                                                               | 12                 | 3.5                | C           | 4             |
| 54404010 | 9000_SavorySweet | Popcorn chips, other flavors                                                                                       | 12                 | 3.5                | C           | 4             |
| 53303070 | 9000_SavorySweet | Pie, blackberry, individual size or tart                                                                           | 12                 | 3                  | C           | 4             |
| 53251100 | 9000_SavorySweet | Cookie, rugelach                                                                                                   | 12                 | 2                  | D           | 4             |
| 53451000 | 9000_SavorySweet | Turnover or dumpling, peach                                                                                        | 12                 | 2                  | D           | 3             |
| 54328200 | 9000_SavorySweet | Crackers, sandwich, cheese filled                                                                                  | 12                 | 1.5                | E           | 4             |
| 53346500 | 9000_SavorySweet | Pie, pineapple cream                                                                                               | 12                 | 2.5                | C           | 3             |
| 54408485 | 9000_SavorySweet | Pretzels, soft, gluten free                                                                                        | 12                 | 2.5                | C           | 4             |
| 53347500 | 9000_SavorySweet | Pie, sour cream, raisin                                                                                            | 12                 | 2.5                | D           | 4             |
| 53260400 | 9000_SavorySweet | Cookie, sugar or plain, sugar free                                                                                 | 12                 | 2                  | D           | 4             |
| 91511050 | 9000_SavorySweet | Gelatin dessert, dietetic, with cream cheese, sweetened with low calorie sweetener                                 | 12                 | 3.5                | B           | 3             |
| 53112000 | 9000_SavorySweet | Cake, ice cream and cake roll, chocolate                                                                           | 12                 | 1.5                | D           | 4             |
| 53420300 | 9000_SavorySweet | Air filled fritter or fried puff, without syrup, Puerto Rican style                                                | 12                 | 1                  | E           | 3             |
| 53450500 | 9000_SavorySweet | Turnover or dumpling, cherry                                                                                       | 12                 | 2.5                | D           | 3             |
| 53122070 | 9000_SavorySweet | Cake, shortcake, biscuit type, with whipped cream and fruit                                                        | 12                 | 2                  | D           | 2             |
| 53106500 | 9000_SavorySweet | Cake, cream, without icing or topping                                                                              | 12                 | 1.5                | E           | 3             |
| 53344070 | 9000_SavorySweet | Pie, custard, individual size or tart                                                                              | 12                 | 3                  | C           | 3             |
| 13127000 | 9000_SavorySweet | Dippin' Dots, flash frozen ice cream snacks, flavors other than chocolate                                          | 12                 | 2                  | D           | 4             |
| 13110000 | 9000_SavorySweet | Ice cream, NFS                                                                                                     | 12                 | 2                  | D           | 4             |
| 13252600 | 9000_SavorySweet | Tiramisu                                                                                                           | 12                 | 1                  | E           | 3             |
| 13130100 | 9000_SavorySweet | Light ice cream, NS as to flavor                                                                                   | 12                 | 2.5                | C           | 4             |
| 13130300 | 9000_SavorySweet | Light ice cream, flavors other than chocolate                                                                      | 12                 | 2.5                | C           | 4             |
| 13110100 | 9000_SavorySweet | Ice cream, regular, flavors other than chocolate                                                                   | 12                 | 2                  | D           | 4             |
| 13110200 | 9000_SavorySweet | Ice cream, soft serve, flavors other than chocolate                                                                | 11                 | 2                  | D           | 4             |
| 13110220 | 9000_SavorySweet | Ice cream, soft serve, NS as to flavor                                                                             | 11                 | 2                  | D           | 4             |

| foodcode | levelInd         | Description                                                                            | Food Compass Score | Health Star Rating | Nutri-Score | NOVA Category |
|----------|------------------|----------------------------------------------------------------------------------------|--------------------|--------------------|-------------|---------------|
| 13120050 | 9000_SavorySweet | Ice cream bar or stick, not chocolate covered or cake covered                          | 11                 | 2                  | D           | 4             |
| 53410860 | 9000_SavorySweet | Cobbler, pineapple                                                                     | 11                 | 2.5                | C           | 3             |
| 13220230 | 9000_SavorySweet | Pudding, ready-to-eat, chocolate, reduced fat                                          | 11                 | 3                  | C           | 4             |
| 13220235 | 9000_SavorySweet | Pudding, ready-to-eat, chocolate, fat free                                             | 11                 | 3                  | C           | 4             |
| 53305080 | 9000_SavorySweet | Pie, cherry, fried pie                                                                 | 11                 | 2.5                | C           | 4             |
| 53302080 | 9000_SavorySweet | Pie, apricot, fried pie                                                                | 11                 | 2.5                | C           | 4             |
| 54403110 | 9000_SavorySweet | Popcorn, caramel coated                                                                | 11                 | 1                  | D           | 4             |
| 91734300 | 9000_SavorySweet | Reese's Sticks                                                                         | 11                 | 0.5                | E           | 4             |
| 53300180 | 9000_SavorySweet | Pie, fried, NFS                                                                        | 11                 | 2.5                | C           | 4             |
| 53301080 | 9000_SavorySweet | Pie, apple, fried pie                                                                  | 11                 | 2.5                | C           | 4             |
| 53430700 | 9000_SavorySweet | Tamale, sweet                                                                          | 11                 | 2.5                | C           | 2             |
| 53340500 | 9000_SavorySweet | Pie, cherry, made with cream cheese and sour cream                                     | 11                 | 2                  | D           | 3             |
| 13122100 | 9000_SavorySweet | Ice cream pie, no crust                                                                | 11                 | 2                  | D           | 4             |
| 53386000 | 9000_SavorySweet | Pie, pudding, flavors other than chocolate                                             | 11                 | 2.5                | C           | 3             |
| 53119000 | 9000_SavorySweet | Cake, pineapple, upside down                                                           | 11                 | 1                  | E           | 2             |
| 53307080 | 9000_SavorySweet | Pie, peach, fried pie                                                                  | 11                 | 2.5                | C           | 4             |
| 53233040 | 9000_SavorySweet | Cookie, oatmeal, reduced fat, NS as to raisins                                         | 11                 | 2.5                | D           | 4             |
| 51184000 | 9000_SavorySweet | Breadsticks, hard, NFS                                                                 | 11                 | 2.5                | C           | 4             |
| 53305750 | 9000_SavorySweet | Pie, lemon, fried pie                                                                  | 11                 | 2.5                | C           | 4             |
| 53420250 | 9000_SavorySweet | Cream puff, no filling or icing                                                        | 11                 | 2                  | D           | 4             |
| 13121200 | 9000_SavorySweet | Ice cream sundae, prepackaged type, flavors other than chocolate                       | 11                 | 2.5                | C           | 4             |
| 53382000 | 9000_SavorySweet | Pie, chocolate-marshmallow                                                             | 11                 | 1                  | E           | 4             |
| 51185000 | 9000_SavorySweet | Croutons                                                                               | 11                 | 1.5                | D           | 4             |
| 13120121 | 9000_SavorySweet | Ice cream bar or stick, rich ice cream, thick chocolate covering                       | 11                 | 1                  | E           | 4             |
| 53311070 | 9000_SavorySweet | Pie, rhubarb, individual size or tart                                                  | 11                 | 2                  | D           | 3             |
| 53104300 | 9000_SavorySweet | Cake, carrot, diet                                                                     | 11                 | 3                  | D           | 4             |
| 53440000 | 9000_SavorySweet | Strudel, apple                                                                         | 10                 | 2.5                | C           | 4             |
| 91706100 | 9000_SavorySweet | Coconut candy, no chocolate covering                                                   | 10                 | 0.5                | E           | 4             |
| 53111000 | 9000_SavorySweet | Cake or cupcake, gingerbread                                                           | 10                 | 1.5                | D           | 3             |
| 53122080 | 9000_SavorySweet | Cake, shortcake, biscuit type, with fruit                                              | 10                 | 2.5                | C           | 2             |
| 13220110 | 9000_SavorySweet | Pudding, flavors other than chocolate, prepared from dry mix, milk added               | 10                 | 2.5                | C           | 3             |
| 53237000 | 9000_SavorySweet | Cookie, raisin                                                                         | 10                 | 1                  | E           | 4             |
| 13120760 | 9000_SavorySweet | Ice cream cone, chocolate covered or dipped, chocolate ice cream                       | 10                 | 2                  | D           | 4             |
| 91726410 | 9000_SavorySweet | Nougat, chocolate covered                                                              | 10                 | 1.5                | D           | 4             |
| 13130610 | 9000_SavorySweet | Light ice cream, soft serve, chocolate                                                 | 10                 | 3                  | C           | 4             |
| 53420400 | 9000_SavorySweet | Sopapilla, without syrup or honey                                                      | 10                 | 1.5                | D           | 3             |
| 53440750 | 9000_SavorySweet | Strudel, pineapple                                                                     | 10                 | 2.5                | D           | 4             |
| 53226600 | 9000_SavorySweet | Cookie, marshmallow and peanut butter, with oat cereal, no bake                        | 10                 | 2                  | D           | 4             |
| 53234250 | 9000_SavorySweet | Cookie, peanut butter with rice cereal, no bake                                        | 10                 | 2                  | D           | 4             |
| 53226500 | 9000_SavorySweet | Cookie, marshmallow, with rice cereal, no bake                                         | 10                 | 2                  | D           | 4             |
| 91706000 | 9000_SavorySweet | Coconut candy, chocolate covered                                                       | 10                 | 0.5                | E           | 4             |
| 11461000 | 9000_SavorySweet | Yogurt, frozen, chocolate-coated                                                       | 10                 | 1                  | E           | 4             |
| 13120300 | 9000_SavorySweet | Ice cream bar, cake covered                                                            | 10                 | 2                  | D           | 4             |
| 91715200 | 9000_SavorySweet | Baby Ruth                                                                              | 10                 | 0.5                | E           | 4             |
| 53101250 | 9000_SavorySweet | Cake, angel food, with fruit and icing or filling                                      | 10                 | 3                  | D           | 3             |
| 91501100 | 9000_SavorySweet | Gelatin salad with vegetables                                                          | 10                 | 4                  | C           | 3             |
| 53308000 | 9000_SavorySweet | Pie, pineapple, two crust                                                              | 10                 | 2.5                | C           | 3             |
| 91718100 | 9000_SavorySweet | Butterfinger                                                                           | 10                 | 0.5                | E           | 4             |
| 53306000 | 9000_SavorySweet | Pie, mince, two crust                                                                  | 10                 | 3                  | C           | 4             |
| 11461260 | 9000_SavorySweet | Yogurt, frozen, cone, flavors other than chocolate                                     | 10                 | 2.5                | D           | 4             |
| 53440600 | 9000_SavorySweet | Strudel, cheese                                                                        | 10                 | 2                  | D           | 3             |
| 91304020 | 9000_SavorySweet | Topping, chocolate, thick, fudge type                                                  | 9                  | 1.5                | D           | 4             |
| 13120790 | 9000_SavorySweet | Ice cream sundae cone                                                                  | 9                  | 2.5                | C           | 4             |
| 54202020 | 9000_SavorySweet | Crackers, saltine, reduced sodium                                                      | 9                  | 2.5                | C           | 4             |
| 13120710 | 9000_SavorySweet | Ice cream cone, chocolate covered, with nuts, flavors other than chocolate             | 9                  | 1                  | E           | 4             |
| 53450000 | 9000_SavorySweet | Turnover or dumpling, apple                                                            | 9                  | 2                  | D           | 3             |
| 54304005 | 9000_SavorySweet | Crackers, cheese (Cheez-It)                                                            | 9                  | 1.5                | E           | 4             |
| 54304020 | 9000_SavorySweet | Crackers, cheese (Goldfish)                                                            | 9                  | 1.5                | E           | 4             |
| 54304000 | 9000_SavorySweet | Crackers, cheese                                                                       | 9                  | 1.5                | E           | 4             |
| 53305700 | 9000_SavorySweet | Pie, lemon, not cream or meringue                                                      | 9                  | 1.5                | D           | 3             |
| 13140660 | 9000_SavorySweet | Light ice cream, sundae, soft serve, chocolate or fudge topping, without whipped cream | 9                  | 2.5                | C           | 4             |
| 13130320 | 9000_SavorySweet | Light ice cream, no sugar added, NS as to flavor                                       | 9                  | 3                  | C           | 4             |
| 13130330 | 9000_SavorySweet | Light ice cream, no sugar added, flavors other than chocolate                          | 9                  | 3                  | C           | 4             |
| 13120720 | 9000_SavorySweet | Ice cream cone, chocolate covered or dipped, flavors other than chocolate              | 9                  | 2                  | D           | 4             |
| 13130310 | 9000_SavorySweet | Light ice cream, chocolate                                                             | 9                  | 2.5                | C           | 4             |
| 13130590 | 9000_SavorySweet | Light ice cream, soft serve, NS as to flavor                                           | 9                  | 3                  | C           | 4             |
| 13130600 | 9000_SavorySweet | Light ice cream, soft serve, flavors other than chocolate                              | 9                  | 3                  | C           | 4             |
| 13140100 | 9000_SavorySweet | Light ice cream, bar or stick, chocolate coated                                        | 9                  | 1                  | D           | 4             |
| 91746010 | 9000_SavorySweet | Sugar-coated chocolate discs                                                           | 9                  | 0.5                | E           | 4             |
| 91746100 | 9000_SavorySweet | M&M's Milk Chocolate Candies                                                           | 9                  | 0.5                | E           | 4             |
| 91746120 | 9000_SavorySweet | Sixlets                                                                                | 9                  | 0.5                | E           | 4             |
| 91746150 | 9000_SavorySweet | Easter egg, candy coated chocolate                                                     | 9                  | 0.5                | E           | 4             |
| 13160410 | 9000_SavorySweet | Fat free ice cream, chocolate                                                          | 9                  | 2.5                | D           | 4             |
| 91511060 | 9000_SavorySweet | Gelatin dessert, dietetic, with sour cream, sweetened with low calorie sweetener       | 9                  | 3.5                | B           | 4             |
| 53118550 | 9000_SavorySweet | Cake, tres leche                                                                       | 9                  | 1.5                | D           | 2             |
| 53410880 | 9000_SavorySweet | Cobbler, plum                                                                          | 9                  | 3.5                | C           | 4             |
| 13120770 | 9000_SavorySweet | Ice cream cone, no topping, chocolate ice cream                                        | 9                  | 2                  | D           | 4             |
| 51161000 | 9000_SavorySweet | Pan Dulce, with fruit, no frosting                                                     | 9                  | 2                  | D           | 4             |
| 51160100 | 9000_SavorySweet | Roll, sweet, cinnamon bun, no frosting                                                 | 9                  | 2                  | D           | 4             |
| 51165000 | 9000_SavorySweet | Coffee cake, yeast type                                                                | 9                  | 2                  | D           | 4             |
| 13210260 | 9000_SavorySweet | Rice flour cream, Puerto Rican style                                                   | 8                  | 2.5                | C           | 1             |
| 53305720 | 9000_SavorySweet | Pie, lemon, not cream or meringue, individual size or tart                             | 8                  | 1.5                | D           | 3             |
| 53341500 | 9000_SavorySweet | Pie, buttermilk                                                                        | 8                  | 1.5                | E           | 3             |
| 91713010 | 9000_SavorySweet | Fudge, chocolate, chocolate-coated                                                     | 8                  | 0.5                | E           | 4             |
| 53115200 | 9000_SavorySweet | Cake or cupcake, marble, with icing or filling                                         | 8                  | 1.5                | E           | 4             |
| 53209010 | 9000_SavorySweet | Cookie, sugar wafer, chocolate-covered                                                 | 8                  | 0.5                | E           | 4             |
| 53210900 | 9000_SavorySweet | Cookie, graham cracker with chocolate and marshmallow                                  | 8                  | 1                  | E           | 4             |
| 13136000 | 9000_SavorySweet | Ice cream sandwich, made with light, no sugar added ice cream                          | 8                  | 4                  | A           | 4             |
| 91611100 | 9000_SavorySweet | Ice pop, sweetened with low calorie sweetener                                          | 8                  | 3.5                | B           | 4             |
| 13120740 | 9000_SavorySweet | Ice cream cone, no topping, NS as to flavor                                            | 8                  | 2                  | D           | 4             |
| 13121000 | 9000_SavorySweet | Ice cream sundae, NS as to topping, with whipped cream                                 | 8                  | 1.5                | D           | 4             |
| 51161020 | 9000_SavorySweet | Roll, sweet, with fruit, frosted                                                       | 8                  | 1.5                | D           | 4             |
| 91351020 | 9000_SavorySweet | Topping, dietetic                                                                      | 8                  | 3.5                | B           | 4             |
| 91404000 | 9000_SavorySweet | Marmalade, all flavors                                                                 | 8                  | 1.5                | D           | 3             |
| 13121300 | 9000_SavorySweet | Ice cream sundae, chocolate or fudge topping, with whipped cream                       | 8                  | 2                  | D           | 4             |
| 53340000 | 9000_SavorySweet | Pie, apple-sour cream                                                                  | 8                  | 3.5                | C           | 4             |
| 13140600 | 9000_SavorySweet | Light ice cream, sundae, soft serve, chocolate or fudge topping, with whipped cream    | 8                  | 2                  | D           | 4             |
| 13210350 | 9000_SavorySweet | Flan                                                                                   | 8                  | 2.5                | D           | 2             |
| 54102020 | 9000_SavorySweet | Graham crackers, chocolate covered                                                     | 8                  | 0.5                | E           | 4             |
| 54401121 | 9000_SavorySweet | Tortilla chips, reduced fat, plain                                                     | 8                  | 3.5                | B           | 4             |
| 54401122 | 9000_SavorySweet | Tortilla chips, reduced fat, flavored                                                  | 8                  | 3.5                | B           | 4             |
| 91303500 | 9000_SavorySweet | Sugar, brown, liquid                                                                   | 8                  | 1.5                | D           | 2             |
| 91706400 | 9000_SavorySweet | Coconut candy, Puerto Rican style                                                      | 8                  | 0.5                | E           | 4             |
| 13130700 | 9000_SavorySweet | Light ice cream, soft serve, blended with candy or cookies                             | 8                  | 2.5                | C           | 4             |



| foodcode | levelInd         | Description                                                                          | Food Compass Score | Health Star Rating | Nutri-Score | NOVA Category |
|----------|------------------|--------------------------------------------------------------------------------------|--------------------|--------------------|-------------|---------------|
| 63430500 | 9000_SavorySweet | Fruit juice bar with cream, frozen                                                   | 8                  | 3                  | C           | 4             |
| 91102010 | 9000_SavorySweet | Sugar, brown                                                                         | 7                  | 0.5                | D           | 2             |
| 91301120 | 9000_SavorySweet | Sugar, caramelized                                                                   | 7                  | 0.5                | D           | 2             |
| 13120730 | 9000_SavorySweet | Ice cream cone, no topping, flavors other than chocolate                             | 7                  | 2.5                | D           | 4             |
| 54440010 | 9000_SavorySweet | Bagel chips                                                                          | 7                  | 2.5                | C           | 4             |
| 13140550 | 9000_SavorySweet | Light ice cream, cone, chocolate                                                     | 7                  | 3                  | C           | 4             |
| 91301200 | 9000_SavorySweet | Sugar, brown, and water syrup                                                        | 7                  | 1                  | D           | 2             |
| 91705090 | 9000_SavorySweet | Chocolate candy with fondant and caramel                                             | 7                  | 0.5                | E           | 4             |
| 53206500 | 9000_SavorySweet | Cookie, chocolate, made with rice cereal                                             | 7                  | 0.5                | E           | 4             |
| 91304030 | 9000_SavorySweet | Topping, fruit                                                                       | 7                  | 3                  | C           | 4             |
| 54408487 | 9000_SavorySweet | Pretzels, soft, gluten free, coated or flavored                                      | 7                  | 2                  | D           | 4             |
| 53208000 | 9000_SavorySweet | Cookie, marshmallow, chocolate-covered                                               | 7                  | 1.5                | D           | 4             |
| 53208200 | 9000_SavorySweet | Cookie, marshmallow pie, chocolate covered                                           | 7                  | 1.5                | D           | 4             |
| 53226000 | 9000_SavorySweet | Cookie, marshmallow, with coconut                                                    | 7                  | 1.5                | D           | 4             |
| 13140670 | 9000_SavorySweet | Light ice cream, sundae, soft serve, fruit topping, without whipped cream            | 7                  | 3                  | C           | 4             |
| 51161280 | 9000_SavorySweet | Pan Dulce, with raisins and icing                                                    | 7                  | 3                  | C           | 4             |
| 91707010 | 9000_SavorySweet | Fondant, chocolate covered                                                           | 7                  | 1                  | D           | 4             |
| 53450800 | 9000_SavorySweet | Turnover or dumpling, lemon                                                          | 7                  | 2.5                | D           | 3             |
| 53236100 | 9000_SavorySweet | Cookie, pumpkin                                                                      | 7                  | 1.5                | D           | 4             |
| 53108220 | 9000_SavorySweet | Snack cake, chocolate, with icing or filling, reduced fat and calories               | 7                  | 2.5                | D           | 4             |
| 13140450 | 9000_SavorySweet | Light ice cream, cone, NFS                                                           | 7                  | 3                  | B           | 4             |
| 13140500 | 9000_SavorySweet | Light ice cream, cone, flavors other than chocolate                                  | 7                  | 3                  | B           | 4             |
| 53520200 | 9000_SavorySweet | Churros                                                                              | 7                  | 1                  | E           | 3             |
| 53203000 | 9000_SavorySweet | Cookie, applesauce                                                                   | 6                  | 1.5                | D           | 4             |
| 53206550 | 9000_SavorySweet | Cookie, chocolate, made with oatmeal and coconut, no bake                            | 6                  | 1.5                | D           | 4             |
| 53233100 | 9000_SavorySweet | Cookie, oatmeal, with chocolate and peanut butter, no bake                           | 6                  | 1.5                | D           | 4             |
| 13121100 | 9000_SavorySweet | Ice cream sundae, fruit topping, with whipped cream                                  | 6                  | 2.5                | D           | 4             |
| 53235500 | 9000_SavorySweet | Cookie, with peanut butter filling, chocolate-coated                                 | 6                  | 0.5                | E           | 4             |
| 53233010 | 9000_SavorySweet | Cookie, oatmeal, with raisins                                                        | 6                  | 1.5                | D           | 4             |
| 53233000 | 9000_SavorySweet | Cookie, oatmeal                                                                      | 6                  | 1.5                | D           | 4             |
| 53114100 | 9000_SavorySweet | Cake or cupcake, lemon, with icing or filling                                        | 6                  | 1                  | E           | 2             |
| 53121270 | 9000_SavorySweet | Cake or cupcake, yellow, with icing or filling                                       | 6                  | 1.5                | D           | 4             |
| 51161270 | 9000_SavorySweet | Pan Dulce, with sugar topping                                                        | 6                  | 3                  | C           | 4             |
| 53209500 | 9000_SavorySweet | Cookie, chocolate and vanilla sandwich                                               | 6                  | 1                  | E           | 4             |
| 53209015 | 9000_SavorySweet | Cookie, chocolate sandwich                                                           | 6                  | 1                  | E           | 4             |
| 54319000 | 9000_SavorySweet | Crackers, rice                                                                       | 6                  | 3.5                | B           | 4             |
| 91705030 | 9000_SavorySweet | Kit Kat                                                                              | 6                  | 0.5                | E           | 4             |
| 91705430 | 9000_SavorySweet | Kit Kat White                                                                        | 6                  | 0.5                | E           | 4             |
| 53206000 | 9000_SavorySweet | Cookie, chocolate chip                                                               | 6                  | 1                  | E           | 4             |
| 53242500 | 9000_SavorySweet | Cookie, toffee bar                                                                   | 6                  | 1                  | E           | 4             |
| 53211000 | 9000_SavorySweet | Cookie bar, with chocolate, nuts, and graham crackers                                | 6                  | 1                  | E           | 4             |
| 53104550 | 9000_SavorySweet | Cheesecake with fruit                                                                | 6                  | 3                  | D           | 4             |
| 13150000 | 9000_SavorySweet | Sherbet, all flavors                                                                 | 6                  | 3                  | C           | 4             |
| 53108200 | 9000_SavorySweet | Snack cake, chocolate, with icing or filling                                         | 6                  | 1.5                | D           | 4             |
| 53209020 | 9000_SavorySweet | Cookie, chocolate sandwich, reduced fat                                              | 6                  | 1.5                | D           | 4             |
| 53521100 | 9000_SavorySweet | Doughnut, chocolate, raised or yeast, with chocolate icing                           | 6                  | 1.5                | D           | 4             |
| 53260030 | 9000_SavorySweet | Cookie, chocolate chip, sugar free                                                   | 6                  | 1.5                | D           | 4             |
| 13140630 | 9000_SavorySweet | Light ice cream, sundae, soft serve, fruit topping, with whipped cream               | 6                  | 2.5                | C           | 4             |
| 53391150 | 9000_SavorySweet | Pie shell, chocolate wafer                                                           | 6                  | 1.5                | D           | 4             |
| 54313000 | 9000_SavorySweet | Crackers, oyster                                                                     | 6                  | 2                  | D           | 4             |
| 54325000 | 9000_SavorySweet | Crackers, saltine                                                                    | 6                  | 2                  | D           | 4             |
| 53201000 | 9000_SavorySweet | Cookie, NFS                                                                          | 6                  | 1                  | E           | 4             |
| 11461200 | 9000_SavorySweet | Yogurt, frozen, sandwich                                                             | 6                  | 2.5                | C           | 4             |
| 53209100 | 9000_SavorySweet | Cookie, chocolate, sandwich, with extra filling                                      | 6                  | 1                  | E           | 4             |
| 54406200 | 9000_SavorySweet | Shrimp chips                                                                         | 6                  | 2                  | D           | 4             |
| 53205260 | 9000_SavorySweet | Cookie, bar, with chocolate                                                          | 5                  | 1                  | E           | 4             |
| 53420000 | 9000_SavorySweet | Cream puff, eclair, custard or cream filled, NS as to icing                          | 5                  | 1.5                | D           | 4             |
| 53243010 | 9000_SavorySweet | Cookie, vanilla sandwich, extra filling                                              | 5                  | 1                  | E           | 4             |
| 53233060 | 9000_SavorySweet | Cookie, oatmeal, with chocolate chips                                                | 5                  | 1.5                | D           | 4             |
| 13140700 | 9000_SavorySweet | Light ice cream, creamsicle or dreamsicle                                            | 5                  | 2.5                | C           | 4             |
| 13161500 | 9000_SavorySweet | Milk dessert sandwich bar, frozen, made from lowfat milk                             | 5                  | 3                  | C           | 4             |
| 53348070 | 9000_SavorySweet | Pie, strawberry cream, individual size or tart                                       | 5                  | 3                  | C           | 4             |
| 13161520 | 9000_SavorySweet | Milk dessert sandwich bar, frozen, with low-calorie sweetener, made from lowfat milk | 5                  | 2                  | D           | 4             |
| 13130620 | 9000_SavorySweet | Light ice cream, soft serve cone, flavors other than chocolate                       | 5                  | 3                  | C           | 4             |
| 13130640 | 9000_SavorySweet | Light ice cream, soft serve cone, NS as to flavor                                    | 5                  | 3                  | C           | 4             |
| 53241600 | 9000_SavorySweet | Cookie, butter or sugar, with fruit and/or nuts                                      | 5                  | 1.5                | E           | 4             |
| 53415400 | 9000_SavorySweet | Crisp, cherry                                                                        | 5                  | 2                  | D           | 4             |
| 13122500 | 9000_SavorySweet | Ice cream pie, with cookie crust, fudge topping, and whipped cream                   | 5                  | 2                  | D           | 4             |
| 53307000 | 9000_SavorySweet | Pie, peach, two crust                                                                | 5                  | 3                  | C           | 4             |
| 53114000 | 9000_SavorySweet | Cake or cupcake, lemon, without icing or filling                                     | 5                  | 1.5                | D           | 4             |
| 91800100 | 9000_SavorySweet | Chewing gum, NFS                                                                     | 5                  | 3                  | C           | 4             |
| 53371000 | 9000_SavorySweet | Pie, chiffon, chocolate                                                              | 5                  | 2                  | D           | 4             |
| 91703400 | 9000_SavorySweet | Whatchamacallit                                                                      | 5                  | 0.5                | E           | 4             |
| 91713030 | 9000_SavorySweet | Fudge, chocolate                                                                     | 4                  | 0.5                | E           | 4             |
| 53204840 | 9000_SavorySweet | Cookie, brownie, reduced fat, NS as to icing                                         | 4                  | 2.5                | D           | 4             |
| 53204860 | 9000_SavorySweet | Cookie, brownie, fat free, NS as to icing                                            | 4                  | 2.5                | D           | 4             |
| 13126000 | 9000_SavorySweet | Ice cream, fried                                                                     | 4                  | 2                  | D           | 4             |
| 53237010 | 9000_SavorySweet | Cookie, raisin sandwich, cream-filled                                                | 4                  | 1.5                | D           | 4             |
| 91305010 | 9000_SavorySweet | Icing, chocolate                                                                     | 4                  | 0.5                | E           | 4             |
| 53233080 | 9000_SavorySweet | Cookie, oatmeal sandwich, with peanut butter and jelly filling                       | 4                  | 1.5                | D           | 4             |
| 53233050 | 9000_SavorySweet | Cookie, oatmeal sandwich, with creme filling                                         | 4                  | 1.5                | D           | 4             |
| 51161250 | 9000_SavorySweet | Pan Dulce, no topping                                                                | 4                  | 3                  | B           | 4             |
| 53116650 | 9000_SavorySweet | Cake, Quezadilla, El Salvadorian style                                               | 4                  | 3                  | B           | 4             |
| 53207000 | 9000_SavorySweet | Cookie, chocolate or fudge                                                           | 4                  | 1                  | E           | 4             |
| 53210000 | 9000_SavorySweet | Cookie, chocolate wafer                                                              | 4                  | 1                  | E           | 4             |
| 53341750 | 9000_SavorySweet | Pie, chess                                                                           | 4                  | 0.5                | E           | 2             |
| 53341000 | 9000_SavorySweet | Pie, banana cream                                                                    | 4                  | 2.5                | C           | 4             |
| 53373000 | 9000_SavorySweet | Pie, black bottom                                                                    | 4                  | 2                  | D           | 4             |
| 13121500 | 9000_SavorySweet | Ice cream sundae, fudge topping, with cake, with whipped cream                       | 4                  | 2                  | D           | 4             |
| 53304000 | 9000_SavorySweet | Pie, blueberry, two crust                                                            | 4                  | 3                  | C           | 4             |
| 91726425 | 9000_SavorySweet | 3 Musketeers Truffle Crisp Bar                                                       | 4                  | 0.5                | E           | 4             |
| 53381000 | 9000_SavorySweet | Pie, lemon meringue                                                                  | 4                  | 2.5                | C           | 4             |
| 53381070 | 9000_SavorySweet | Pie, lemon meringue, individual size or tart                                         | 4                  | 2.5                | C           | 4             |
| 53386250 | 9000_SavorySweet | Pie, pudding, chocolate, with chocolate coating, individual size                     | 4                  | 1.5                | D           | 4             |
| 53391100 | 9000_SavorySweet | Pie shell, graham cracker                                                            | 3                  | 1.5                | D           | 4             |
| 13135010 | 9000_SavorySweet | Ice cream sandwich, made with light chocolate ice cream                              | 3                  | 2.5                | C           | 4             |
| 53224000 | 9000_SavorySweet | Cookie, ladyfinger                                                                   | 3                  | 2                  | D           | 4             |
| 54308000 | 9000_SavorySweet | Crackers, milk                                                                       | 3                  | 2                  | D           | 4             |
| 53420410 | 9000_SavorySweet | Sopaipilla with syrup or honey                                                       | 3                  | 1.5                | D           | 3             |
| 53112100 | 9000_SavorySweet | Cake, ice cream and cake roll, not chocolate                                         | 3                  | 1.5                | D           | 4             |
| 53109220 | 9000_SavorySweet | Snack cake, not chocolate, with icing or filling, reduced fat and calories           | 3                  | 3                  | D           | 4             |
| 54304100 | 9000_SavorySweet | Crackers, cheese, reduced fat                                                        | 3                  | 1.5                | D           | 4             |
| 53238000 | 9000_SavorySweet | Cookie, sandwich-type, not chocolate or vanilla                                      | 3                  | 1.5                | D           | 4             |
| 53243000 | 9000_SavorySweet | Cookie, vanilla sandwich                                                             | 3                  | 1.5                | D           | 4             |

| foodcode | levelInd         | Description                                                                                                         | Food Compass Score | Health Star Rating | Nutri-Score | NOVA Category |
|----------|------------------|---------------------------------------------------------------------------------------------------------------------|--------------------|--------------------|-------------|---------------|
| 54102200 | 9000_SavorySweet | Graham crackers, sandwich, with filling                                                                             | 3                  | 1.5                | D           | 4             |
| 53247500 | 9000_SavorySweet | Cookie, vanilla with caramel, coconut, and chocolate coating                                                        | 3                  | 0.5                | E           | 4             |
| 13210290 | 9000_SavorySweet | Pudding, flavors other than chocolate, low calorie, containing artificial sweetener, NS as to from dry mix or ready | 3                  | 3                  | C           | 4             |
| 13230120 | 9000_SavorySweet | Pudding, ready-to-eat, low calorie, containing artificial sweetener, flavors other than chocolate                   | 3                  | 3                  | C           | 4             |
| 32401000 | 9000_SavorySweet | Meringues                                                                                                           | 3                  | 1                  | D           | 2             |
| 91200005 | 9000_SavorySweet | Sugar substitute, liquid, NFS                                                                                       | 3                  | 3.5                | B           | 4             |
| 91351010 | 9000_SavorySweet | Syrup, dietetic                                                                                                     | 3                  | 3.5                | B           | 4             |
| 53226550 | 9000_SavorySweet | Cookie, marshmallow, with rice cereal and chocolate chips                                                           | 3                  | 0.5                | E           | 4             |
| 13170000 | 9000_SavorySweet | Baked Alaska                                                                                                        | 3                  | 2                  | D           | 4             |
| 53420100 | 9000_SavorySweet | Cream puff, eclair, custard or cream filled, not iced                                                               | 3                  | 1.5                | D           | 4             |
| 53239100 | 9000_SavorySweet | Pocky                                                                                                               | 3                  | 1.5                | D           | 4             |
| 53123080 | 9000_SavorySweet | Cake, shortcake, sponge type, with fruit                                                                            | 3                  | 2                  | D           | 3             |
| 53520150 | 9000_SavorySweet | Doughnut, cake type, chocolate covered, dipped in peanuts                                                           | 3                  | 1                  | E           | 4             |
| 53116350 | 9000_SavorySweet | Cake, pound, Puerto Rican style                                                                                     | 2                  | 0.5                | E           | 2             |
| 91611050 | 9000_SavorySweet | Ice pop filled with ice cream, all flavor varieties                                                                 | 2                  | 3                  | C           | 4             |
| 53215500 | 9000_SavorySweet | Cookie, coconut                                                                                                     | 2                  | 0.5                | E           | 4             |
| 53225000 | 9000_SavorySweet | Cookie, macaroon                                                                                                    | 2                  | 0.5                | E           | 4             |
| 13230130 | 9000_SavorySweet | Pudding, ready-to-eat, chocolate                                                                                    | 2                  | 3                  | C           | 4             |
| 13210410 | 9000_SavorySweet | Pudding, rice                                                                                                       | 2                  | 3                  | C           | 4             |
| 53301750 | 9000_SavorySweet | Pie, apple, diet                                                                                                    | 2                  | 3                  | C           | 4             |
| 13210220 | 9000_SavorySweet | Pudding, chocolate, NS as to from dry mix or ready-to-eat                                                           | 2                  | 3                  | C           | 4             |
| 13230500 | 9000_SavorySweet | Pudding, ready-to-eat, tapioca                                                                                      | 2                  | 3                  | C           | 4             |
| 53308300 | 9000_SavorySweet | Pie, plum, two crust                                                                                                | 2                  | 2.5                | D           | 4             |
| 53123500 | 9000_SavorySweet | Cake, shortcake, with whipped topping and fruit, diet                                                               | 2                  | 2.5                | D           | 4             |
| 13200110 | 9000_SavorySweet | Pudding, NFS                                                                                                        | 2                  | 3                  | C           | 4             |
| 53521210 | 9000_SavorySweet | Doughnut, custard-filled                                                                                            | 2                  | 2                  | D           | 4             |
| 53521120 | 9000_SavorySweet | Doughnut, chocolate, raised or yeast                                                                                | 2                  | 1.5                | D           | 4             |
| 53204100 | 9000_SavorySweet | Cookie, brownie, with icing or filling                                                                              | 2                  | 1                  | E           | 4             |
| 53307570 | 9000_SavorySweet | Pie, pear, individual size or tart                                                                                  | 2                  | 2.5                | C           | 4             |
| 53270100 | 9000_SavorySweet | Cookies, Puerto Rican style                                                                                         | 2                  | 1                  | E           | 2             |
| 53247000 | 9000_SavorySweet | Cookie, vanilla wafer                                                                                               | 2                  | 1.5                | D           | 4             |
| 53247050 | 9000_SavorySweet | Cookie, vanilla wafer, reduced fat                                                                                  | 2                  | 1.5                | D           | 4             |
| 91801000 | 9000_SavorySweet | Chewing gum, regular                                                                                                | 2                  | 1.5                | D           | 4             |
| 53386500 | 9000_SavorySweet | Pie, pudding, flavors other than chocolate, with chocolate coating, individual size                                 | 2                  | 1.5                | D           | 4             |
| 53102800 | 9000_SavorySweet | Cake or cupcake, Black Forest                                                                                       | 1                  | 1.5                | D           | 4             |
| 53510000 | 9000_SavorySweet | Danish pastry, plain or spice                                                                                       | 1                  | 1.5                | D           | 4             |
| 91306030 | 9000_SavorySweet | Chocolate dip                                                                                                       | 1                  | 1                  | E           | 4             |
| 53204000 | 9000_SavorySweet | Cookie, brownie, NS as to icing                                                                                     | 1                  | 1.5                | D           | 4             |
| 53204010 | 9000_SavorySweet | Cookie, brownie, without icing                                                                                      | 1                  | 1.5                | D           | 4             |
| 53520120 | 9000_SavorySweet | Doughnut, chocolate, cake type                                                                                      | 1                  | 1.5                | D           | 4             |
| 91705400 | 9000_SavorySweet | Chocolate, white                                                                                                    | 1                  | 0.5                | E           | 4             |
| 51187020 | 9000_SavorySweet | Anisette toast                                                                                                      | 1                  | 3                  | C           | 4             |
| 51188500 | 9000_SavorySweet | Zwieback toast                                                                                                      | 1                  | 3                  | C           | 4             |
| 91726140 | 9000_SavorySweet | MILKY WAY MIDNIGHT Bar                                                                                              | 1                  | 0.5                | E           | 4             |
| 53205250 | 9000_SavorySweet | Cookie, butterscotch, brownie                                                                                       | 1                  | 1.5                | D           | 4             |
| 13110120 | 9000_SavorySweet | Ice cream, rich, flavors other than chocolate                                                                       | 1                  | 1.5                | D           | 4             |
| 13110140 | 9000_SavorySweet | Ice cream, rich, NS as to flavor                                                                                    | 1                  | 1.5                | D           | 4             |
| 13120310 | 9000_SavorySweet | Ice cream bar, stick or nugget, with crunch coating                                                                 | 1                  | 1                  | D           | 4             |
| 13120500 | 9000_SavorySweet | Ice cream sandwich                                                                                                  | 1                  | 2.5                | C           | 4             |
| 13120550 | 9000_SavorySweet | Ice cream cookie sandwich                                                                                           | 1                  | 3                  | C           | 4             |
| 13121400 | 9000_SavorySweet | Ice cream sundae, not fruit or chocolate topping, with whipped cream                                                | 1                  | 1.5                | D           | 4             |
| 13135000 | 9000_SavorySweet | Ice cream sandwich, made with light ice cream, flavors other than chocolate                                         | 1                  | 3                  | C           | 4             |
| 13140650 | 9000_SavorySweet | Light ice cream, sundae, soft serve, not fruit or chocolate topping, with whipped cream                             | 1                  | 2                  | D           | 4             |
| 13140680 | 9000_SavorySweet | Light ice cream, sundae, soft serve, not fruit or chocolate topping, without whipped cream                          | 1                  | 2.5                | C           | 4             |
| 13210280 | 9000_SavorySweet | Pudding, flavors other than chocolate, NS as to from dry mix or ready-to-eat                                        | 1                  | 2.5                | C           | 4             |
| 13220240 | 9000_SavorySweet | Pudding, ready-to-eat, flavors other than chocolate, reduced fat                                                    | 1                  | 3                  | C           | 4             |
| 13220245 | 9000_SavorySweet | Pudding, ready-to-eat, flavors other than chocolate, fat free                                                       | 1                  | 3                  | C           | 4             |
| 13230110 | 9000_SavorySweet | Pudding, ready-to-eat, flavors other than chocolate                                                                 | 1                  | 2.5                | C           | 4             |
| 13230200 | 9000_SavorySweet | Pudding, ready-to-eat, chocolate and non-chocolate flavors combined                                                 | 1                  | 3                  | C           | 4             |
| 13230510 | 9000_SavorySweet | Pudding, ready-to-eat, tapioca, fat free                                                                            | 1                  | 3                  | C           | 4             |
| 13252200 | 9000_SavorySweet | Milk dessert or milk candy, Puerto Rican style                                                                      | 1                  | 1.5                | D           | 4             |
| 51160000 | 9000_SavorySweet | Roll, sweet, no frosting                                                                                            | 1                  | 3                  | C           | 4             |
| 51160110 | 9000_SavorySweet | Roll, sweet, cinnamon bun, frosted                                                                                  | 1                  | 0.5                | E           | 4             |
| 51161030 | 9000_SavorySweet | Roll, sweet, with fruit, frosted, diet                                                                              | 1                  | 0.5                | E           | 4             |
| 51166000 | 9000_SavorySweet | Croissant                                                                                                           | 1                  | 1                  | E           | 4             |
| 51166100 | 9000_SavorySweet | Croissant, cheese                                                                                                   | 1                  | 1.5                | D           | 4             |
| 51166200 | 9000_SavorySweet | Croissant, chocolate                                                                                                | 1                  | 1                  | E           | 4             |
| 51166500 | 9000_SavorySweet | Croissant, fruit                                                                                                    | 1                  | 1.5                | D           | 4             |
| 51167000 | 9000_SavorySweet | Brioche                                                                                                             | 1                  | 1                  | D           | 4             |
| 51187000 | 9000_SavorySweet | Melba toast                                                                                                         | 1                  | 4                  | B           | 4             |
| 51188100 | 9000_SavorySweet | Pannetone                                                                                                           | 1                  | 2                  | D           | 4             |
| 53101100 | 9000_SavorySweet | Cake, angel food, without icing or filling                                                                          | 1                  | 2                  | D           | 4             |
| 53101200 | 9000_SavorySweet | Cake, angel food, with icing or filling                                                                             | 1                  | 1                  | E           | 2             |
| 53103000 | 9000_SavorySweet | Cake, Boston cream pie                                                                                              | 1                  | 2                  | D           | 4             |
| 53104400 | 9000_SavorySweet | Cake or cupcake, coconut, with icing or filling                                                                     | 1                  | 1                  | E           | 4             |
| 53104500 | 9000_SavorySweet | Cheesecake                                                                                                          | 1                  | 1                  | E           | 4             |
| 53104600 | 9000_SavorySweet | Cheesecake, chocolate                                                                                               | 1                  | 1                  | E           | 4             |
| 53109200 | 9000_SavorySweet | Snack cake, not chocolate, with icing or filling                                                                    | 1                  | 1                  | E           | 4             |
| 53116000 | 9000_SavorySweet | Cake, pound, without icing or filling                                                                               | 1                  | 1.5                | E           | 4             |
| 53116020 | 9000_SavorySweet | Cake, pound, with icing or filling                                                                                  | 1                  | 1                  | E           | 4             |
| 53116270 | 9000_SavorySweet | Cake, pound, chocolate                                                                                              | 1                  | 1                  | E           | 4             |
| 53116390 | 9000_SavorySweet | Cake, pound, reduced fat, cholesterol free                                                                          | 1                  | 2                  | D           | 4             |
| 53118100 | 9000_SavorySweet | Cake, sponge, without icing or filling                                                                              | 1                  | 1.5                | D           | 4             |
| 53118200 | 9000_SavorySweet | Cake, sponge, with icing or filling                                                                                 | 1                  | 1                  | E           | 4             |
| 53118300 | 9000_SavorySweet | Cake, sponge, chocolate                                                                                             | 1                  | 1                  | E           | 4             |
| 53118410 | 9000_SavorySweet | Rum cake, without icing                                                                                             | 1                  | 1.5                | E           | 4             |
| 53120270 | 9000_SavorySweet | Cake or cupcake, white, with icing or filling                                                                       | 1                  | 1.5                | D           | 4             |
| 53123070 | 9000_SavorySweet | Cake, shortcake, sponge type, with whipped cream and fruit                                                          | 1                  | 2                  | D           | 3             |
| 53202000 | 9000_SavorySweet | Cookie, almond                                                                                                      | 1                  | 1                  | E           | 4             |
| 53206030 | 9000_SavorySweet | Cookie, chocolate chip, reduced fat                                                                                 | 1                  | 1.5                | D           | 4             |
| 53206100 | 9000_SavorySweet | Cookie, chocolate chip sandwich                                                                                     | 1                  | 1                  | E           | 4             |
| 53207020 | 9000_SavorySweet | Cookie, chocolate or fudge, reduced fat                                                                             | 1                  | 1.5                | D           | 4             |
| 53207050 | 9000_SavorySweet | Cookie, chocolate, with chocolate filling or coating, fat free                                                      | 1                  | 1.5                | D           | 4             |
| 53209005 | 9000_SavorySweet | Cookie, chocolate, with icing or coating                                                                            | 1                  | 0.5                | E           | 4             |
| 53222010 | 9000_SavorySweet | Cookie, fortune                                                                                                     | 1                  | 2                  | D           | 4             |
| 53222020 | 9000_SavorySweet | Cookie, cone shell, ice cream type, wafer or cake                                                                   | 1                  | 3.5                | B           | 4             |
| 53223000 | 9000_SavorySweet | Cookie, gingersnaps                                                                                                 | 1                  | 2                  | D           | 4             |
| 53228000 | 9000_SavorySweet | Cookie, meringue                                                                                                    | 1                  | 0.5                | D           | 2             |
| 53230000 | 9000_SavorySweet | Cookie, molasses                                                                                                    | 1                  | 1.5                | D           | 4             |
| 53231000 | 9000_SavorySweet | Cookie, Lebkuchen                                                                                                   | 1                  | 1.5                | D           | 4             |
| 53235600 | 9000_SavorySweet | Cookie, Pfeffernusse                                                                                                | 1                  | 1                  | E           | 4             |
| 53236000 | 9000_SavorySweet | Cookie, Pizzelle                                                                                                    | 1                  | 3.5                | B           | 4             |
| 53237500 | 9000_SavorySweet | Cookie, rum ball, no bake                                                                                           | 1                  | 1                  | E           | 4             |
| 53239000 | 9000_SavorySweet | Cookie, shortbread                                                                                                  | 1                  | 1                  | E           | 4             |

| foodcode | levelInd         | Description                                                         | Food Compass Score | Health Star Rating | Nutri-Score | NOVA Category |
|----------|------------------|---------------------------------------------------------------------|--------------------|--------------------|-------------|---------------|
| 53239010 | 9000_SavorySweet | Cookie, shortbread, reduced fat                                     | 1                  | 1.5                | D           | 4             |
| 53239050 | 9000_SavorySweet | Cookie, shortbread, with icing or filling                           | 1                  | 1                  | E           | 4             |
| 53240000 | 9000_SavorySweet | Cookie, animal                                                      | 1                  | 1.5                | D           | 4             |
| 53240010 | 9000_SavorySweet | Cookie, animal, with frosting or icing                              | 1                  | 0.5                | E           | 4             |
| 53241500 | 9000_SavorySweet | Cookie, butter or sugar                                             | 1                  | 1                  | E           | 4             |
| 53241510 | 9000_SavorySweet | Marie biscuit                                                       | 1                  | 1.5                | D           | 4             |
| 53242000 | 9000_SavorySweet | Cookie, sugar wafer                                                 | 1                  | 0.5                | E           | 4             |
| 53243050 | 9000_SavorySweet | Cookie, vanilla sandwich, reduced fat                               | 1                  | 1.5                | D           | 4             |
| 53244010 | 9000_SavorySweet | Cookie, butter or sugar, with chocolate icing or filling            | 1                  | 0.5                | E           | 4             |
| 53244020 | 9000_SavorySweet | Cookie, butter or sugar, with icing or filling other than chocolate | 1                  | 1                  | E           | 4             |
| 53246000 | 9000_SavorySweet | Cookie, tea, Japanese                                               | 1                  | 2                  | D           | 4             |
| 53261000 | 9000_SavorySweet | Cookie, gluten free                                                 | 1                  | 0.5                | E           | 4             |
| 53300100 | 9000_SavorySweet | Pie, NFS                                                            | 1                  | 3                  | C           | 4             |
| 53301000 | 9000_SavorySweet | Pie, apple, two crust                                               | 1                  | 3                  | C           | 4             |
| 53305000 | 9000_SavorySweet | Pie, cherry, two crust                                              | 1                  | 2.5                | C           | 4             |
| 53305070 | 9000_SavorySweet | Pie, cherry, individual size or tart                                | 1                  | 2.5                | C           | 4             |
| 53342000 | 9000_SavorySweet | Pie, chocolate cream                                                | 1                  | 1                  | E           | 4             |
| 53343000 | 9000_SavorySweet | Pie, coconut cream                                                  | 1                  | 2                  | D           | 4             |
| 53365000 | 9000_SavorySweet | Pie, vanilla cream                                                  | 1                  | 2.5                | D           | 4             |
| 53370000 | 9000_SavorySweet | Pie, chiffon, not chocolate                                         | 1                  | 2                  | D           | 4             |
| 53386050 | 9000_SavorySweet | Pie, pudding, flavors other than chocolate, individual size or tart | 1                  | 2                  | D           | 4             |
| 53391000 | 9000_SavorySweet | Pie shell                                                           | 1                  | 1.5                | D           | 4             |
| 53391200 | 9000_SavorySweet | Vanilla wafer dessert base                                          | 1                  | 1.5                | E           | 4             |
| 53420200 | 9000_SavorySweet | Cream puff, éclair, custard or cream filled, iced                   | 1                  | 1.5                | D           | 4             |
| 53420210 | 9000_SavorySweet | Cream puff, éclair, custard or cream filled, iced, reduced fat      | 1                  | 2                  | D           | 4             |
| 53452500 | 9000_SavorySweet | Pastry, mainly flour and water, fried                               | 1                  | 1.5                | D           | 4             |
| 53453150 | 9000_SavorySweet | Empanada, Mexican turnover, fruit-filled                            | 1                  | 2.5                | C           | 4             |
| 53500100 | 9000_SavorySweet | Breakfast pastry, NFS                                               | 1                  | 1.5                | D           | 4             |
| 53510100 | 9000_SavorySweet | Danish pastry, with fruit                                           | 1                  | 1.5                | D           | 4             |
| 53511000 | 9000_SavorySweet | Danish pastry, with cheese                                          | 1                  | 2                  | D           | 4             |
| 53520000 | 9000_SavorySweet | Doughnut, NS as to cake or yeast                                    | 1                  | 1                  | E           | 4             |
| 53520110 | 9000_SavorySweet | Doughnut, cake type                                                 | 1                  | 1                  | E           | 4             |
| 53520140 | 9000_SavorySweet | Doughnut, cake type, chocolate covered                              | 1                  | 0.5                | E           | 4             |
| 53520160 | 9000_SavorySweet | Doughnut, chocolate, cake type, with chocolate icing                | 1                  | 0.5                | E           | 4             |
| 53520500 | 9000_SavorySweet | Doughnut, Asian                                                     | 1                  | 1                  | E           | 4             |
| 53520600 | 9000_SavorySweet | Cruller, NFS                                                        | 1                  | 1                  | E           | 4             |
| 53520700 | 9000_SavorySweet | French cruller                                                      | 1                  | 1.5                | D           | 4             |
| 53521110 | 9000_SavorySweet | Doughnut, raised or yeast                                           | 1                  | 1.5                | E           | 4             |
| 53521130 | 9000_SavorySweet | Doughnut, raised or yeast, chocolate covered                        | 1                  | 1                  | E           | 4             |
| 53521140 | 9000_SavorySweet | Doughnut, jelly                                                     | 1                  | 1.5                | D           | 4             |
| 53521220 | 9000_SavorySweet | Doughnut, chocolate cream-filled                                    | 1                  | 1.5                | D           | 4             |
| 53521230 | 9000_SavorySweet | Doughnut, custard-filled, with icing                                | 1                  | 1.5                | E           | 4             |
| 53530000 | 9000_SavorySweet | Breakfast tart                                                      | 1                  | 1.5                | D           | 4             |
| 53530010 | 9000_SavorySweet | Breakfast tart, lowfat                                              | 1                  | 3                  | C           | 4             |
| 54102060 | 9000_SavorySweet | Crackers, Cuban                                                     | 1                  | 1.5                | D           | 4             |
| 54319500 | 9000_SavorySweet | Rice paper                                                          | 1                  | 3.5                | B           | 3             |
| 54325010 | 9000_SavorySweet | Crackers, saltine, reduced fat                                      | 1                  | 2.5                | C           | 4             |
| 54336000 | 9000_SavorySweet | Crackers, water                                                     | 1                  | 3.5                | B           | 4             |
| 54408000 | 9000_SavorySweet | Pretzels, NFS                                                       | 1                  | 2                  | C           | 4             |
| 54408015 | 9000_SavorySweet | Pretzels, hard, NFS                                                 | 1                  | 2                  | C           | 4             |
| 54408016 | 9000_SavorySweet | Pretzels, hard, plain, salted                                       | 1                  | 2                  | C           | 4             |
| 54408017 | 9000_SavorySweet | Pretzels, hard, plain, lightly salted                               | 1                  | 3                  | C           | 4             |
| 54408030 | 9000_SavorySweet | Pretzels, hard, plain, unsalted                                     | 1                  | 3.5                | A           | 4             |
| 54408035 | 9000_SavorySweet | Pretzels, hard, flavored                                            | 1                  | 2                  | C           | 4             |
| 54408070 | 9000_SavorySweet | Pretzels, hard, multigrain                                          | 1                  | 2                  | C           | 4             |
| 54408081 | 9000_SavorySweet | Pretzels, hard, plain, gluten free                                  | 1                  | 1                  | D           | 4             |
| 54408082 | 9000_SavorySweet | Pretzels, hard, flavored, gluten free                               | 1                  | 1                  | D           | 4             |
| 54408105 | 9000_SavorySweet | Pretzel chips, hard, plain                                          | 1                  | 1                  | C           | 4             |
| 54408110 | 9000_SavorySweet | Pretzel chips, hard, flavored                                       | 1                  | 0.5                | C           | 4             |
| 54408115 | 9000_SavorySweet | Pretzel chips, hard, gluten free                                    | 1                  | 0.5                | D           | 4             |
| 54408190 | 9000_SavorySweet | Pretzels, hard, coated, NFS                                         | 1                  | 1                  | E           | 4             |
| 54408200 | 9000_SavorySweet | Pretzels, hard, chocolate coated                                    | 1                  | 1                  | E           | 4             |
| 54408210 | 9000_SavorySweet | Pretzels, hard, white chocolate coated                              | 1                  | 0.5                | E           | 4             |
| 54408250 | 9000_SavorySweet | Pretzels, hard, yogurt coated                                       | 1                  | 0.5                | E           | 4             |
| 54408260 | 9000_SavorySweet | Pretzels, hard, coated, gluten free                                 | 1                  | 0.5                | E           | 4             |
| 54408290 | 9000_SavorySweet | Pretzels, hard, filled, NFS                                         | 1                  | 0.5                | E           | 4             |
| 54408300 | 9000_SavorySweet | Pretzels, hard, cheese filled                                       | 1                  | 0.5                | E           | 4             |
| 54408400 | 9000_SavorySweet | Pretzels, soft, NFS                                                 | 1                  | 2                  | D           | 4             |
| 54408405 | 9000_SavorySweet | Pretzels, soft, ready-to-eat, NFS                                   | 1                  | 2                  | D           | 4             |
| 54408410 | 9000_SavorySweet | Pretzels, soft, ready-to-eat, salted, buttered                      | 1                  | 2                  | D           | 4             |
| 54408411 | 9000_SavorySweet | Pretzels, soft, ready-to-eat, unsalted, buttered                    | 1                  | 3.5                | B           | 4             |
| 54408415 | 9000_SavorySweet | Pretzels, soft, ready-to-eat, salted, no butter                     | 1                  | 2                  | D           | 4             |
| 54408416 | 9000_SavorySweet | Pretzels, soft, ready-to-eat, unsalted, no butter                   | 1                  | 3.5                | A           | 4             |
| 54408420 | 9000_SavorySweet | Pretzels, soft, ready-to-eat, cinnamon sugar coated                 | 1                  | 2.5                | C           | 4             |
| 54408422 | 9000_SavorySweet | Pretzels, soft, ready-to-eat, coated or flavored                    | 1                  | 2                  | D           | 4             |
| 54408430 | 9000_SavorySweet | Pretzels, soft, ready-to-eat, topped with meat                      | 1                  | 3                  | C           | 4             |
| 54408432 | 9000_SavorySweet | Pretzels, soft, ready-to-eat, topped with cheese                    | 1                  | 3.5                | B           | 4             |
| 54408450 | 9000_SavorySweet | Pretzels, soft, from frozen, NFS                                    | 1                  | 2                  | D           | 4             |
| 54408455 | 9000_SavorySweet | Pretzels, soft, from frozen, salted                                 | 1                  | 2                  | D           | 4             |
| 54408456 | 9000_SavorySweet | Pretzels, soft, from frozen, unsalted                               | 1                  | 3.5                | A           | 4             |
| 54408460 | 9000_SavorySweet | Pretzels, soft, from frozen, cinnamon sugar coated                  | 1                  | 2.5                | C           | 4             |
| 54408462 | 9000_SavorySweet | Pretzels, soft, from frozen, coated or flavored                     | 1                  | 2                  | D           | 4             |
| 54408465 | 9000_SavorySweet | Pretzels, soft, from frozen, topped with meat                       | 1                  | 3                  | C           | 4             |
| 54408466 | 9000_SavorySweet | Pretzels, soft, from frozen, topped with cheese                     | 1                  | 3.5                | B           | 4             |
| 54408470 | 9000_SavorySweet | Pretzels, soft, filled with cheese                                  | 1                  | 3.5                | B           | 4             |
| 54408475 | 9000_SavorySweet | Pretzels, soft, from school lunch                                   | 1                  | 4                  | A           | 4             |
| 54408480 | 9000_SavorySweet | Pretzels, soft, multigrain                                          | 1                  | 3.5                | A           | 4             |
| 54408486 | 9000_SavorySweet | Pretzels, soft, gluten free, cinnamon sugar coated                  | 1                  | 2                  | D           | 4             |
| 58157110 | 9000_SavorySweet | Spicy rice pudding, Puerto Rican style                              | 1                  | 2.5                | C           | 3             |
| 91101000 | 9000_SavorySweet | Sugar, NFS                                                          | 1                  | 0.5                | D           | 2             |
| 91101010 | 9000_SavorySweet | Sugar, white, granulated or lump                                    | 1                  | 0.5                | D           | 2             |
| 91101020 | 9000_SavorySweet | Sugar, white, confectioner's, powdered                              | 1                  | 0.5                | D           | 2             |
| 91106010 | 9000_SavorySweet | Sugar substitute and sugar blend                                    | 1                  | 0.5                | D           | 4             |
| 91107000 | 9000_SavorySweet | Sugar substitute, sucralose, powder                                 | 1                  | 1                  | D           | 4             |
| 91200000 | 9000_SavorySweet | Sugar substitute, powder, NFS                                       | 1                  | 0.5                | D           | 4             |
| 91200040 | 9000_SavorySweet | Sugar substitute, saccharin, powder                                 | 1                  | 0.5                | D           | 4             |
| 91200110 | 9000_SavorySweet | Sugar substitute, saccharin, liquid                                 | 1                  | 3.5                | B           | 4             |
| 91201010 | 9000_SavorySweet | Sugar substitute, aspartame, powder                                 | 1                  | 1                  | D           | 4             |
| 91300010 | 9000_SavorySweet | Syrup, NFS                                                          | 1                  | 2                  | D           | 4             |
| 91300100 | 9000_SavorySweet | Pancake syrup, NFS                                                  | 1                  | 2                  | D           | 4             |
| 91301020 | 9000_SavorySweet | Cane and corn pancake syrup                                         | 1                  | 2.5                | C           | 4             |
| 91301030 | 9000_SavorySweet | Corn syrup, light or dark                                           | 1                  | 1                  | D           | 4             |
| 91301040 | 9000_SavorySweet | Buttered blends syrup                                               | 1                  | 1                  | D           | 4             |
| 91301050 | 9000_SavorySweet | Fruit syrup                                                         | 1                  | 1.5                | D           | 4             |

| foodcode | levelInd         | Description                                                                           | Food Compass Score | Health Star Rating | Nutri-Score | NOVA Category |
|----------|------------------|---------------------------------------------------------------------------------------|--------------------|--------------------|-------------|---------------|
| 91301080 | 9000_SavorySweet | Chocolate syrup, thin type                                                            | 1                  | 1.5                | D           | 4             |
| 91301081 | 9000_SavorySweet | Chocolate syrup, thin type, light                                                     | 1                  | 2.5                | C           | 4             |
| 91301100 | 9000_SavorySweet | Sugar, white, and water syrup                                                         | 1                  | 1                  | D           | 2             |
| 91301130 | 9000_SavorySweet | Fruit flavored syrup used for milk beverages                                          | 1                  | 1.5                | D           | 4             |
| 91301250 | 9000_SavorySweet | Maple and corn and/or cane pancake syrup blends                                       | 1                  | 2                  | D           | 4             |
| 91301510 | 9000_SavorySweet | Syrup, pancake, reduced calorie                                                       | 1                  | 2.5                | C           | 4             |
| 91302020 | 9000_SavorySweet | Agave liquid sweetener                                                                | 1                  | 1.5                | D           | 2             |
| 91304010 | 9000_SavorySweet | Topping, butterscotch or caramel                                                      | 1                  | 1.5                | D           | 4             |
| 91304040 | 9000_SavorySweet | Topping, marshmallow                                                                  | 1                  | 2                  | D           | 4             |
| 91304050 | 9000_SavorySweet | Hard sauce                                                                            | 1                  | 0.5                | E           | 4             |
| 91305020 | 9000_SavorySweet | Icing, white                                                                          | 1                  | 1                  | E           | 4             |
| 91306020 | 9000_SavorySweet | Caramel dip, regular                                                                  | 1                  | 0.5                | E           | 4             |
| 91306025 | 9000_SavorySweet | Caramel dip, light                                                                    | 1                  | 1.5                | D           | 4             |
| 91306040 | 9000_SavorySweet | Dessert dip                                                                           | 1                  | 1.5                | D           | 4             |
| 91361040 | 9000_SavorySweet | Dessert sauce                                                                         | 1                  | 2.5                | C           | 2             |
| 91501010 | 9000_SavorySweet | Gelatin dessert                                                                       | 1                  | 3                  | B           | 4             |
| 91501015 | 9000_SavorySweet | Gelatin snacks                                                                        | 1                  | 2.5                | C           | 4             |
| 91501030 | 9000_SavorySweet | Gelatin dessert with whipped cream                                                    | 1                  | 3                  | C           | 4             |
| 91501050 | 9000_SavorySweet | Gelatin dessert with cream cheese                                                     | 1                  | 3                  | C           | 3             |
| 91501060 | 9000_SavorySweet | Gelatin dessert with sour cream                                                       | 1                  | 3                  | C           | 2             |
| 91511010 | 9000_SavorySweet | Gelatin dessert, dietetic, sweetened with low calorie sweetener                       | 1                  | 3.5                | B           | 4             |
| 91511030 | 9000_SavorySweet | Gelatin dessert, dietetic, with whipped topping, sweetened with low calorie sweetener | 1                  | 3.5                | B           | 4             |
| 91512010 | 9000_SavorySweet | Danish dessert pudding                                                                | 1                  | 3                  | C           | 4             |
| 91580000 | 9000_SavorySweet | Gelatin, frozen, whipped, on a stick                                                  | 1                  | 3                  | B           | 4             |
| 91601000 | 9000_SavorySweet | Ice, fruit                                                                            | 1                  | 2.5                | C           | 4             |
| 91611000 | 9000_SavorySweet | Ice pop                                                                               | 1                  | 3                  | C           | 4             |
| 91621000 | 9000_SavorySweet | Snow cone                                                                             | 1                  | 2.5                | C           | 4             |
| 91700010 | 9000_SavorySweet | Candy, NFS                                                                            | 1                  | 1.5                | D           | 4             |
| 91702010 | 9000_SavorySweet | Butterscotch morsels                                                                  | 1                  | 0.5                | E           | 4             |
| 91703010 | 9000_SavorySweet | Caramel, chocolate-flavored roll                                                      | 1                  | 1.5                | D           | 4             |
| 91703020 | 9000_SavorySweet | Caramel, flavor other than chocolate                                                  | 1                  | 1                  | D           | 4             |
| 91703040 | 9000_SavorySweet | Caramel candy, chocolate covered                                                      | 1                  | 0.5                | E           | 4             |
| 91703070 | 9000_SavorySweet | Rolo                                                                                  | 1                  | 0.5                | E           | 4             |
| 91703200 | 9000_SavorySweet | TWIX Caramel Cookie Bars                                                              | 1                  | 0.5                | E           | 4             |
| 91707000 | 9000_SavorySweet | Fondant                                                                               | 1                  | 0.5                | D           | 4             |
| 91708000 | 9000_SavorySweet | Fruit peel, candied                                                                   | 1                  | 1                  | D           | 4             |
| 91708030 | 9000_SavorySweet | Fruit leather and fruit snacks candy                                                  | 1                  | 1.5                | D           | 4             |
| 91708040 | 9000_SavorySweet | Fun Fruits Creme Supremes                                                             | 1                  | 0.5                | E           | 4             |
| 91708070 | 9000_SavorySweet | Tamarind candy                                                                        | 1                  | 0.5                | E           | 4             |
| 91708100 | 9000_SavorySweet | Fruit snacks candy, with high vitamin C                                               | 1                  | 1                  | D           | 4             |
| 91709000 | 9000_SavorySweet | Gumdrops, chocolate covered                                                           | 1                  | 1                  | E           | 4             |
| 91713070 | 9000_SavorySweet | Fudge, vanilla                                                                        | 1                  | 0.5                | D           | 4             |
| 91715300 | 9000_SavorySweet | 100 GRAND Bar                                                                         | 1                  | 0.5                | E           | 4             |
| 91721000 | 9000_SavorySweet | Licorice                                                                              | 1                  | 1                  | D           | 4             |
| 91723000 | 9000_SavorySweet | Marshmallow                                                                           | 1                  | 1.5                | D           | 4             |
| 91723010 | 9000_SavorySweet | Marshmallow, chocolate covered                                                        | 1                  | 1                  | D           | 4             |
| 91723020 | 9000_SavorySweet | Marshmallow, candy-coated                                                             | 1                  | 1                  | D           | 4             |
| 91723050 | 9000_SavorySweet | Marshmallow, coconut-coated                                                           | 1                  | 1                  | D           | 4             |
| 91726110 | 9000_SavorySweet | Nougat, with caramel, chocolate covered                                               | 1                  | 0.5                | E           | 4             |
| 91726130 | 9000_SavorySweet | MILKY WAY Bar                                                                         | 1                  | 0.5                | E           | 4             |
| 91726420 | 9000_SavorySweet | 3 MUSKETEERS Bar                                                                      | 1                  | 0.5                | E           | 4             |
| 91745010 | 9000_SavorySweet | Gumdrops                                                                              | 1                  | 1.5                | D           | 4             |
| 91745020 | 9000_SavorySweet | Hard candy                                                                            | 1                  | 1.5                | D           | 4             |
| 91745040 | 9000_SavorySweet | Butterscotch hard candy                                                               | 1                  | 0.5                | E           | 4             |
| 91745100 | 9000_SavorySweet | Skittles                                                                              | 1                  | 0.5                | E           | 4             |
| 91746200 | 9000_SavorySweet | M&M's Pretzel Chocolate Candies                                                       | 1                  | 0.5                | E           | 4             |
| 91750000 | 9000_SavorySweet | Taffy                                                                                 | 1                  | 1                  | E           | 4             |
| 91760000 | 9000_SavorySweet | Toffee, plain                                                                         | 1                  | 1                  | D           | 4             |
| 91760100 | 9000_SavorySweet | Toffee, chocolate covered                                                             | 1                  | 0.5                | E           | 4             |
| 91760700 | 9000_SavorySweet | Wax candy, liquid filled                                                              | 1                  | 2.5                | C           | 4             |
| 91770000 | 9000_SavorySweet | Dietetic or low calorie candy, NFS                                                    | 1                  | 3                  | C           | 4             |
| 91770010 | 9000_SavorySweet | Dietetic or low calorie gumdrops                                                      | 1                  | 1                  | D           | 4             |
| 91770020 | 9000_SavorySweet | Dietetic or low calorie hard candy                                                    | 1                  | 3                  | C           | 4             |
| 91770050 | 9000_SavorySweet | Dietetic or low calorie mints                                                         | 1                  | 3                  | C           | 4             |

Supplementary Table 8. Original (uncorrected) scores for all food items.

| foodcode | level1nd        | Description                                                              | Food Compass Score | Health Star Rating | Nutri-Score | NOVA Category |
|----------|-----------------|--------------------------------------------------------------------------|--------------------|--------------------|-------------|---------------|
| 75132000 | 10000_Beverages | Mixed vegetable juice                                                    | 100                | 4                  | C           | 1             |
| 75132100 | 10000_Beverages | Celery juice                                                             | 100                | 4                  | B           | 1             |
| 74301150 | 10000_Beverages | Tomato juice, 100%, low sodium                                           | 100                | 4                  | B           | 1             |
| 95110020 | 10000_Beverages | Nutritional drink or shake, high protein, ready-to-drink (Slim Fast)     | 93                 | 1                  | C           | 4             |
| 95120010 | 10000_Beverages | Nutritional drink or shake, high protein, ready-to-drink, NFS            | 93                 | 1                  | C           | 4             |
| 92201010 | 10000_Beverages | Coffee substitute                                                        | 89                 | 3.5                | B           | 1             |
| 95106010 | 10000_Beverages | Nutritional drink or shake, ready-to-drink, light (Muscle Milk)          | 88                 | 2                  | C           | 4             |
| 74303100 | 10000_Beverages | Tomato and vegetable juice, 100%, low sodium                             | 88                 | 4                  | B           | 3             |
| 64104600 | 10000_Beverages | Blackberry juice, 100%                                                   | 87                 | 3                  | C           | 1             |
| 78101100 | 10000_Beverages | Fruit and vegetable smoothie                                             | 87                 | 1.5                | D           | 3             |
| 64132500 | 10000_Beverages | Strawberry juice, 100%                                                   | 85                 | 3                  | C           | 1             |
| 95110010 | 10000_Beverages | Nutritional drink or shake, ready-to-drink, sugar free (Slim Fast)       | 85                 | 0.5                | C           | 4             |
| 73105010 | 10000_Beverages | Carrot juice, 100%                                                       | 84                 | 4                  | C           | 1             |
| 64134020 | 10000_Beverages | Fruit smoothie, with whole fruit, no dairy, added protein                | 84                 | 2                  | D           | 1             |
| 61210820 | 10000_Beverages | Orange juice, 100%, with calcium added, frozen, reconstituted            | 83                 | 3                  | C           | 1             |
| 95105000 | 10000_Beverages | Nutritional drink or shake, ready-to-drink (Kellogg's Special K Protein) | 82                 | 0.5                | D           | 4             |
| 95106000 | 10000_Beverages | Nutritional drink or shake, ready-to-drink (Muscle Milk)                 | 81                 | 1.5                | C           | 4             |
| 95110000 | 10000_Beverages | Nutritional drink or shake, ready-to-drink (Slim Fast)                   | 79                 | 0.5                | C           | 4             |
| 61210250 | 10000_Beverages | Orange juice, 100%, with calcium added, canned, bottled or in a carton   | 78                 | 3                  | D           | 1             |
| 74301100 | 10000_Beverages | Tomato juice, 100%                                                       | 78                 | 4                  | B           | 3             |
| 78101110 | 10000_Beverages | Fruit and vegetable smoothie, added protein                              | 77                 | 1.5                | D           | 4             |
| 64133100 | 10000_Beverages | Watermelon juice, 100%                                                   | 76                 | 4                  | C           | 1             |
| 61201020 | 10000_Beverages | Grapefruit juice, 100%, NS as to form                                    | 75                 | 4                  | B           | 1             |
| 61201220 | 10000_Beverages | Grapefruit juice, 100%, canned, bottled or in a carton                   | 75                 | 4                  | B           | 1             |
| 61213900 | 10000_Beverages | Fruit juice blend, citrus, 100% juice, with calcium added                | 75                 | 3                  | D           | 1             |
| 78101120 | 10000_Beverages | Fruit and vegetable smoothie, bottled                                    | 75                 | 2                  | D           | 1             |
| 92102502 | 10000_Beverages | Coffee, Iced Latte, with non-dairy milk                                  | 74                 | 2                  | C           | 4             |
| 61210620 | 10000_Beverages | Orange juice, 100%, frozen, reconstituted                                | 74                 | 3                  | C           | 1             |
| 74302000 | 10000_Beverages | Tomato juice cocktail                                                    | 74                 | 4                  | C           | 3             |
| 74303000 | 10000_Beverages | Tomato and vegetable juice, 100%                                         | 74                 | 4                  | C           | 3             |
| 64134015 | 10000_Beverages | Fruit smoothie, with whole fruit, no dairy                               | 74                 | 3.5                | C           | 1             |
| 92161002 | 10000_Beverages | Coffee, Cappuccino, with non-dairy milk                                  | 74                 | 2                  | C           | 4             |
| 92162002 | 10000_Beverages | Coffee, Cappuccino, decaffeinated, with non-dairy milk                   | 74                 | 2                  | C           | 4             |
| 61210720 | 10000_Beverages | Orange juice, 100%, frozen, not reconstituted                            | 73                 | 1                  | E           | 1             |
| 92102512 | 10000_Beverages | Coffee, Iced Latte, decaffeinated, with non-dairy milk                   | 73                 | 2                  | C           | 4             |
| 92102511 | 10000_Beverages | Coffee, Iced Latte, decaffeinated, nonfat                                | 73                 | 3.5                | C           | 1             |
| 92102501 | 10000_Beverages | Coffee, Iced Latte, nonfat                                               | 73                 | 3.5                | C           | 1             |
| 61210000 | 10000_Beverages | Orange juice, 100%, NFS                                                  | 73                 | 3                  | D           | 1             |
| 95104000 | 10000_Beverages | Nutritional drink or shake, ready-to-drink, sugar free (Glucerna)        | 73                 | 0.5                | D           | 4             |
| 64134030 | 10000_Beverages | Fruit smoothie juice drink, no dairy                                     | 73                 | 3                  | C           | 1             |
| 92161001 | 10000_Beverages | Coffee, Cappuccino, nonfat                                               | 73                 | 3.5                | C           | 1             |
| 92162001 | 10000_Beverages | Coffee, Cappuccino, decaffeinated, nonfat                                | 72                 | 3.5                | C           | 1             |
| 61210010 | 10000_Beverages | Orange juice, 100%, freshly squeezed                                     | 72                 | 3                  | D           | 1             |
| 92101913 | 10000_Beverages | Coffee, Latte, decaffeinated, with non-dairy milk                        | 71                 | 1.5                | C           | 4             |
| 92101901 | 10000_Beverages | Coffee, Latte, nonfat                                                    | 71                 | 1.5                | C           | 1             |
| 92101911 | 10000_Beverages | Coffee, Latte, decaffeinated, nonfat                                     | 70                 | 1.5                | C           | 1             |
| 92101903 | 10000_Beverages | Coffee, Latte, with non-dairy milk                                       | 70                 | 1.5                | C           | 4             |
| 64134200 | 10000_Beverages | Fruit smoothie, bottled                                                  | 70                 | 3.5                | D           | 1             |
| 61210220 | 10000_Beverages | Orange juice, 100%, canned, bottled or in a carton                       | 70                 | 3                  | D           | 1             |
| 64121000 | 10000_Beverages | Passion fruit juice, 100%                                                | 69                 | 2                  | D           | 1             |
| 95342000 | 10000_Beverages | Fruit juice, acai blend                                                  | 68                 | 0.5                | E           | 3             |
| 61213220 | 10000_Beverages | Tangerine juice, 100%                                                    | 66                 | 3                  | D           | 1             |
| 95101000 | 10000_Beverages | Nutritional drink or shake, ready-to-drink (Boost)                       | 66                 | 0.5                | E           | 4             |
| 64132010 | 10000_Beverages | Prune juice, 100%                                                        | 66                 | 1                  | E           | 1             |
| 61201010 | 10000_Beverages | Grapefruit juice, 100%, freshly squeezed                                 | 65                 | 3                  | C           | 1             |
| 64105400 | 10000_Beverages | Cranberry juice, 100%, not a blend                                       | 65                 | 3.5                | D           | 1             |
| 95101010 | 10000_Beverages | Nutritional drink or shake, ready-to-drink (Boost Plus)                  | 64                 | 0.5                | E           | 4             |
| 95120020 | 10000_Beverages | Nutritional drink or shake, high protein, light, ready-to-drink, NFS     | 64                 | 0.5                | E           | 4             |
| 95120050 | 10000_Beverages | Nutritional drink or shake, liquid, soy-based                            | 64                 | 0.5                | E           | 4             |
| 61201225 | 10000_Beverages | Grapefruit juice, 100%, with calcium added                               | 64                 | 3                  | C           | 1             |
| 61201620 | 10000_Beverages | Grapefruit juice, 100%, frozen, reconstituted                            | 64                 | 3                  | D           | 1             |
| 64134100 | 10000_Beverages | Fruit smoothie, light                                                    | 62                 | 1                  | D           | 4             |
| 61213800 | 10000_Beverages | Fruit juice blend, citrus, 100% juice                                    | 61                 | 3.5                | D           | 1             |
| 64124020 | 10000_Beverages | Pineapple juice, 100%                                                    | 61                 | 3.5                | D           | 1             |
| 92801000 | 10000_Beverages | Wine, nonalcoholic                                                       | 60                 | 3                  | B           | 4             |
| 92802000 | 10000_Beverages | Wine, light, nonalcoholic                                                | 60                 | 3                  | B           | 4             |
| 64104030 | 10000_Beverages | Apple juice, 100%, with calcium added                                    | 59                 | 3.5                | D           | 1             |
| 92101906 | 10000_Beverages | Coffee, Latte, with non-dairy milk, flavored                             | 59                 | 0.5                | D           | 4             |
| 92101919 | 10000_Beverages | Coffee, Latte, decaffeinated, with non-dairy milk, flavored              | 59                 | 0.5                | D           | 4             |
| 11553100 | 10000_Beverages | Fruit smoothie, NFS                                                      | 59                 | 0.5                | D           | 3             |
| 64116060 | 10000_Beverages | Grape juice, 100%, with calcium added                                    | 59                 | 1.5                | E           | 1             |
| 92432000 | 10000_Beverages | Fruit juice drink, citrus, carbonated                                    | 58                 | 4                  | C           | 4             |
| 92102500 | 10000_Beverages | Coffee, Iced Latte                                                       | 58                 | 2                  | C           | 1             |
| 92102510 | 10000_Beverages | Coffee, Iced Latte, decaffeinated                                        | 58                 | 2                  | C           | 1             |
| 64116020 | 10000_Beverages | Grape juice, 100%                                                        | 58                 | 1.5                | E           | 1             |
| 92161000 | 10000_Beverages | Coffee, Cappuccino                                                       | 58                 | 2                  | C           | 1             |
| 11553130 | 10000_Beverages | Fruit smoothie juice drink, with dairy                                   | 58                 | 0.5                | E           | 3             |
| 92162000 | 10000_Beverages | Coffee, Cappuccino, decaffeinated                                        | 58                 | 2                  | C           | 1             |
| 11553110 | 10000_Beverages | Fruit smoothie, with whole fruit and dairy                               | 57                 | 0.5                | D           | 3             |
| 92102515 | 10000_Beverages | Coffee, Iced Latte, decaffeinated, with non-dairy milk, flavored         | 56                 | 1.5                | D           | 4             |
| 92550350 | 10000_Beverages | Orange juice beverage, 40-50% juice, light                               | 56                 | 4                  | B           | 4             |
| 64100100 | 10000_Beverages | Fruit juice, NFS                                                         | 56                 | 3.5                | D           | 1             |
| 92101900 | 10000_Beverages | Coffee, Latte                                                            | 55                 | 1.5                | D           | 1             |
| 92101910 | 10000_Beverages | Coffee, Latte, decaffeinated                                             | 55                 | 1.5                | D           | 1             |
| 92101610 | 10000_Beverages | Coffee, espresso                                                         | 55                 | 3                  | C           | 1             |

Supplementary Table 8. Original (uncorrected) scores for all food items.

|          |                 |                                                                                               |    |     |   |   |
|----------|-----------------|-----------------------------------------------------------------------------------------------|----|-----|---|---|
| 64104010 | 10000_Beverages | Apple juice, 100%                                                                             | 55 | 3.5 | D | 1 |
| 92307510 | 10000_Beverages | Iced Tea / Lemonade juice drink, light                                                        | 54 | 4   | B | 1 |
| 11553120 | 10000_Beverages | Fruit smoothie, with whole fruit and dairy, added protein                                     | 54 | 0.5 | E | 4 |
| 92102505 | 10000_Beverages | Coffee, Iced Latte, with non-dairy milk, flavored                                             | 54 | 1.5 | D | 4 |
| 92101630 | 10000_Beverages | Coffee, espresso, decaffeinated                                                               | 54 | 3   | C | 1 |
| 92101905 | 10000_Beverages | Coffee, Latte, nonfat, flavored                                                               | 54 | 1   | D | 1 |
| 92101918 | 10000_Beverages | Coffee, Latte, decaffeinated, nonfat, flavored                                                | 54 | 1   | D | 1 |
| 92202010 | 10000_Beverages | Chicory beverage                                                                              | 53 | 3.5 | B | 1 |
| 64100110 | 10000_Beverages | Fruit juice blend, 100% juice                                                                 | 53 | 3.5 | D | 1 |
| 92433000 | 10000_Beverages | Fruit juice drink, noncitrus, carbonated                                                      | 53 | 3.5 | C | 1 |
| 64126000 | 10000_Beverages | Pomegranate juice, 100%                                                                       | 52 | 2   | D | 1 |
| 92101960 | 10000_Beverages | Coffee, Cafe Mocha, with non-dairy milk                                                       | 52 | 0.5 | E | 4 |
| 64100200 | 10000_Beverages | Cranberry juice blend, 100% juice                                                             | 52 | 3.5 | D | 1 |
| 92550380 | 10000_Beverages | Pomegranate juice beverage, 40-50% juice, light                                               | 52 | 2   | E | 1 |
| 95103000 | 10000_Beverages | Nutritional drink or shake, ready-to-drink (Ensure)                                           | 51 | 0.5 | E | 4 |
| 95120000 | 10000_Beverages | Nutritional drink or shake, ready-to-drink, NFS                                               | 51 | 0.5 | E | 4 |
| 92101975 | 10000_Beverages | Coffee, Cafe Mocha, decaffeinated, with non-dairy milk                                        | 50 | 0.5 | E | 4 |
| 92102514 | 10000_Beverages | Coffee, Iced Latte, decaffeinated, nonfat, flavored                                           | 50 | 1.5 | C | 1 |
| 92102504 | 10000_Beverages | Coffee, Iced Latte, nonfat, flavored                                                          | 50 | 1.5 | C | 1 |
| 64101010 | 10000_Beverages | Apple cider                                                                                   | 50 | 3.5 | D | 1 |
| 92101810 | 10000_Beverages | Coffee, macchiato                                                                             | 47 | 2   | C | 4 |
| 92101850 | 10000_Beverages | Coffee, cafe con leche                                                                        | 47 | 1   | D | 1 |
| 92101851 | 10000_Beverages | Coffee, cafe con leche, decaffeinated                                                         | 47 | 1   | D | 1 |
| 64120010 | 10000_Beverages | Papaya juice, 100%                                                                            | 46 | 1.5 | D | 1 |
| 92307500 | 10000_Beverages | Iced Tea / Lemonade juice drink                                                               | 45 | 4   | D | 1 |
| 92102602 | 10000_Beverages | Coffee, Iced Cafe Mocha, with non-dairy milk                                                  | 45 | 0.5 | D | 4 |
| 92102612 | 10000_Beverages | Coffee, Iced Cafe Mocha, decaffeinated, with non-dairy milk                                   | 45 | 0.5 | D | 4 |
| 42404010 | 10000_Beverages | Coconut water, sweetened                                                                      | 44 | 1   | D | 3 |
| 64100220 | 10000_Beverages | Cranberry juice blend, 100% juice, with calcium added                                         | 43 | 3.5 | D | 4 |
| 95103010 | 10000_Beverages | Nutritional drink or shake, ready-to-drink (Ensure Plus)                                      | 42 | 0.5 | E | 4 |
| 92510720 | 10000_Beverages | Fruit punch, made with fruit juice and soda                                                   | 41 | 3.5 | D | 1 |
| 92511250 | 10000_Beverages | Fruit juice beverage, 40-50% juice, citrus                                                    | 41 | 3   | D | 4 |
| 92101904 | 10000_Beverages | Coffee, Latte, flavored                                                                       | 41 | 0.5 | D | 1 |
| 92101917 | 10000_Beverages | Coffee, Latte, decaffeinated, flavored                                                        | 40 | 0.5 | D | 1 |
| 92510650 | 10000_Beverages | Tamarind drink                                                                                | 40 | 1   | E | 3 |
| 95102000 | 10000_Beverages | Nutritional drink or shake, ready-to-drink (Carnation Instant Breakfast)                      | 39 | 0.5 | E | 4 |
| 92102503 | 10000_Beverages | Coffee, Iced Latte, flavored                                                                  | 39 | 1   | D | 1 |
| 92102513 | 10000_Beverages | Coffee, Iced Latte, decaffeinated, flavored                                                   | 39 | 1   | D | 1 |
| 92101800 | 10000_Beverages | Coffee, Cuban                                                                                 | 38 | 1   | D | 1 |
| 92550200 | 10000_Beverages | Grape juice drink, light                                                                      | 38 | 4   | C | 4 |
| 64210010 | 10000_Beverages | Papaya nectar                                                                                 | 35 | 1.5 | E | 1 |
| 92171000 | 10000_Beverages | Coffee, bottled/canned                                                                        | 35 | 0.5 | E | 4 |
| 92550030 | 10000_Beverages | Fruit juice drink, with high vitamin C, light                                                 | 34 | 4   | C | 4 |
| 64201010 | 10000_Beverages | Apricot nectar                                                                                | 34 | 1.5 | E | 4 |
| 92550110 | 10000_Beverages | Cranberry juice drink, with high vitamin C, light                                             | 34 | 4   | C | 4 |
| 11551050 | 10000_Beverages | Licualdo or Batido                                                                            | 33 | 0.5 | E | 4 |
| 92510730 | 10000_Beverages | Fruit punch, made with soda, fruit juice, and sherbet or ice cream                            | 33 | 1   | E | 3 |
| 64201500 | 10000_Beverages | Banana nectar                                                                                 | 33 | 1   | E | 4 |
| 92101955 | 10000_Beverages | Coffee, Cafe Mocha, nonfat                                                                    | 32 | 0.5 | D | 4 |
| 92101970 | 10000_Beverages | Coffee, Cafe Mocha, decaffeinated, nonfat                                                     | 32 | 0.5 | D | 4 |
| 92171010 | 10000_Beverages | Coffee, bottled/canned, light                                                                 | 32 | 1.5 | D | 1 |
| 64203020 | 10000_Beverages | Guava nectar                                                                                  | 32 | 3.5 | D | 4 |
| 92121030 | 10000_Beverages | Coffee, mocha, instant, pre-lightened and pre-sweetened with low calorie sweetener, reconst   | 31 | 3.5 | C | 4 |
| 92121050 | 10000_Beverages | Coffee, mocha, instant, decaffeinated, pre-lightened and pre-sweetened with low calorie swee  | 31 | 3   | C | 4 |
| 92512090 | 10000_Beverages | Pina Colada, nonalcoholic                                                                     | 30 | 1   | E | 3 |
| 64202010 | 10000_Beverages | Cantaloupe nectar                                                                             | 28 | 1.5 | E | 4 |
| 92102601 | 10000_Beverages | Coffee, Iced Cafe Mocha, nonfat                                                               | 28 | 0.5 | D | 4 |
| 92102611 | 10000_Beverages | Coffee, Iced Cafe Mocha, decaffeinated, nonfat                                                | 28 | 0.5 | D | 4 |
| 92101933 | 10000_Beverages | Frozen coffee drink, decaffeinated, with non-dairy milk                                       | 27 | 0.5 | E | 4 |
| 92101600 | 10000_Beverages | Coffee, Turkish                                                                               | 27 | 1.5 | C | 1 |
| 64205010 | 10000_Beverages | Peach nectar                                                                                  | 27 | 2   | E | 4 |
| 92306800 | 10000_Beverages | Tea, hot, chai, with milk                                                                     | 26 | 0.5 | D | 4 |
| 92101820 | 10000_Beverages | Coffee, macchiato, sweetened                                                                  | 26 | 1   | D | 4 |
| 64204010 | 10000_Beverages | Mango nectar                                                                                  | 25 | 2   | E | 4 |
| 92102020 | 10000_Beverages | Frozen mocha coffee drink, with non-dairy milk                                                | 25 | 0.5 | E | 4 |
| 64200100 | 10000_Beverages | Fruit nectar, NFS                                                                             | 25 | 2   | E | 4 |
| 92102080 | 10000_Beverages | Frozen mocha coffee drink, decaffeinated, with non-dairy milk                                 | 24 | 0.5 | E | 4 |
| 92530610 | 10000_Beverages | Fruit juice drink, with high vitamin C                                                        | 24 | 3.5 | D | 4 |
| 92550360 | 10000_Beverages | Apple juice beverage, 40-50% juice, light                                                     | 24 | 4   | C | 4 |
| 64213010 | 10000_Beverages | Passion fruit nectar                                                                          | 23 | 1   | E | 4 |
| 92101923 | 10000_Beverages | Frozen coffee drink, with non-dairy milk                                                      | 23 | 0.5 | E | 4 |
| 78101000 | 10000_Beverages | Vegetable and fruit juice, 100% juice, with high vitamin C                                    | 22 | 3.5 | D | 4 |
| 42403010 | 10000_Beverages | Coconut water, unsweetened                                                                    | 22 | 2   | C | 4 |
| 92101950 | 10000_Beverages | Coffee, Cafe Mocha                                                                            | 21 | 0.5 | E | 4 |
| 92101965 | 10000_Beverages | Coffee, Cafe Mocha, decaffeinated                                                             | 21 | 0.5 | E | 4 |
| 92582110 | 10000_Beverages | Fruit juice drink, added calcium (Sunny D)                                                    | 19 | 3.5 | D | 4 |
| 92542000 | 10000_Beverages | Fruit flavored drink, with high vitamin C, powdered, reconstituted                            | 19 | 0.5 | D | 4 |
| 92130011 | 10000_Beverages | Coffee, decaffeinated, pre-lightened                                                          | 19 | 3   | C | 4 |
| 64215010 | 10000_Beverages | Pear nectar                                                                                   | 18 | 1.5 | E | 4 |
| 92101921 | 10000_Beverages | Frozen coffee drink, nonfat                                                                   | 18 | 0.5 | E | 4 |
| 92101931 | 10000_Beverages | Frozen coffee drink, decaffeinated, nonfat                                                    | 18 | 0.5 | E | 4 |
| 95312560 | 10000_Beverages | Energy drink (Ocean Spray Cran-Energy Juice Drink)                                            | 18 | 4   | C | 4 |
| 92130010 | 10000_Beverages | Coffee, pre-lightened                                                                         | 17 | 3   | C | 4 |
| 92102600 | 10000_Beverages | Coffee, Iced Cafe Mocha                                                                       | 17 | 0.5 | D | 4 |
| 92121041 | 10000_Beverages | Coffee, instant, decaffeinated, pre-lightened and pre-sweetened with low calorie sweetener, r | 17 | 3.5 | C | 4 |
| 92102610 | 10000_Beverages | Coffee, Iced Cafe Mocha, decaffeinated                                                        | 17 | 0.5 | D | 4 |

Supplementary Table 8. Original (uncorrected) scores for all food items.

|          |                 |                                                                                            |    |     |   |   |
|----------|-----------------|--------------------------------------------------------------------------------------------|----|-----|---|---|
| 92130006 | 10000_Beverages | Coffee, decaffeinated, pre-lightened and pre-sweetened with low calorie sweetener          | 17 | 3.5 | C | 4 |
| 92102010 | 10000_Beverages | Frozen mocha coffee drink, nonfat                                                          | 17 | 0.5 | E | 4 |
| 92102070 | 10000_Beverages | Frozen mocha coffee drink, decaffeinated, nonfat                                           | 17 | 0.5 | E | 4 |
| 92121040 | 10000_Beverages | Coffee, instant, pre-lightened and pre-sweetened with low calorie sweetener, reconstituted | 16 | 3.5 | C | 4 |
| 92130005 | 10000_Beverages | Coffee, pre-lightened and pre-sweetened with low calorie sweetener                         | 16 | 3.5 | C | 4 |
| 92121020 | 10000_Beverages | Coffee, mocha, instant, pre-lightened and pre-sweetened with sugar, reconstituted          | 16 | 1   | D | 4 |
| 92610030 | 10000_Beverages | Horchata beverage, made with milk                                                          | 15 | 0.5 | E | 4 |
| 92102050 | 10000_Beverages | Frozen mocha coffee drink, with non-dairy milk and whipped cream                           | 15 | 0.5 | E | 4 |
| 92610020 | 10000_Beverages | Horchata beverage, made with water                                                         | 15 | 0.5 | E | 4 |
| 92611100 | 10000_Beverages | Oatmeal beverage with milk                                                                 | 14 | 0.5 | E | 4 |
| 92101928 | 10000_Beverages | Frozen coffee drink, with non-dairy milk and whipped cream                                 | 14 | 0.5 | E | 4 |
| 92101938 | 10000_Beverages | Frozen coffee drink, decaffeinated, with non-dairy milk and whipped cream                  | 14 | 0.5 | E | 4 |
| 92530950 | 10000_Beverages | Vegetable and fruit juice drink, with high vitamin C                                       | 14 | 4   | C | 4 |
| 92102110 | 10000_Beverages | Frozen mocha coffee drink, decaffeinated, with non-dairy milk and whipped cream            | 14 | 0.5 | E | 4 |
| 92531030 | 10000_Beverages | Fruit juice drink (Sunny D)                                                                | 14 | 2   | E | 4 |
| 92305040 | 10000_Beverages | Tea, iced, instant, black, pre-sweetened with sugar                                        | 13 | 1   | D | 4 |
| 64221010 | 10000_Beverages | Soursop, nectar                                                                            | 13 | 1.5 | E | 4 |
| 92511000 | 10000_Beverages | Lemonade, frozen concentrate, not reconstituted                                            | 12 | 1   | E | 4 |
| 92308500 | 10000_Beverages | Tea, iced, brewed, green, pre-sweetened with sugar                                         | 12 | 1   | D | 4 |
| 92308530 | 10000_Beverages | Tea, iced, brewed, green, decaffeinated, pre-sweetened with sugar                          | 12 | 1   | D | 4 |
| 92308000 | 10000_Beverages | Tea, iced, brewed, black, pre-sweetened with sugar                                         | 12 | 1   | D | 4 |
| 92308030 | 10000_Beverages | Tea, iced, brewed, black, decaffeinated, pre-sweetened with sugar                          | 12 | 1   | D | 4 |
| 92611010 | 10000_Beverages | Oatmeal beverage with water                                                                | 11 | 0.5 | D | 4 |
| 92530510 | 10000_Beverages | Cranberry juice drink, with high vitamin C                                                 | 11 | 2   | E | 4 |
| 92101926 | 10000_Beverages | Frozen coffee drink, nonfat, with whipped cream                                            | 10 | 0.5 | E | 4 |
| 92102040 | 10000_Beverages | Frozen mocha coffee drink, nonfat, with whipped cream                                      | 10 | 0.5 | E | 4 |
| 92102100 | 10000_Beverages | Frozen mocha coffee drink, decaffeinated, nonfat, with whipped cream                       | 10 | 0.5 | E | 4 |
| 92101936 | 10000_Beverages | Frozen coffee drink, decaffeinated, nonfat, with whipped cream                             | 10 | 0.5 | E | 4 |
| 92613510 | 10000_Beverages | Cornmeal beverage with chocolate milk                                                      | 10 | 0.5 | E | 4 |
| 94210200 | 10000_Beverages | Water, bottled, flavored (Glacéau Vitamin Water)                                           | 9  | 1.5 | C | 4 |
| 92102000 | 10000_Beverages | Frozen mocha coffee drink                                                                  | 9  | 0.5 | E | 4 |
| 92102060 | 10000_Beverages | Frozen mocha coffee drink, decaffeinated                                                   | 8  | 0.5 | E | 4 |
| 92101925 | 10000_Beverages | Frozen coffee drink, with whipped cream                                                    | 8  | 0.5 | E | 4 |
| 92101935 | 10000_Beverages | Frozen coffee drink, decaffeinated, with whipped cream                                     | 8  | 0.5 | E | 4 |
| 92101930 | 10000_Beverages | Frozen coffee drink, decaffeinated                                                         | 8  | 0.5 | E | 4 |
| 92101920 | 10000_Beverages | Frozen coffee drink                                                                        | 8  | 0.5 | E | 4 |
| 92102090 | 10000_Beverages | Frozen mocha coffee drink, decaffeinated, with whipped cream                               | 8  | 0.5 | E | 4 |
| 92102030 | 10000_Beverages | Frozen mocha coffee drink, with whipped cream                                              | 8  | 0.5 | E | 4 |
| 92613010 | 10000_Beverages | Cornmeal beverage                                                                          | 7  | 0.5 | E | 4 |
| 92550370 | 10000_Beverages | Lemonade, fruit juice drink, light                                                         | 6  | 4   | C | 4 |
| 92130021 | 10000_Beverages | Coffee, decaffeinated, pre-sweetened with sugar                                            | 6  | 2   | C | 4 |
| 92121010 | 10000_Beverages | Coffee, instant, pre-sweetened with sugar, reconstituted                                   | 6  | 2   | C | 4 |
| 92130020 | 10000_Beverages | Coffee, pre-sweetened with sugar                                                           | 6  | 2   | C | 4 |
| 92309000 | 10000_Beverages | Tea, iced, bottled, black                                                                  | 5  | 0.5 | D | 4 |
| 95310700 | 10000_Beverages | Energy drink (Rockstar)                                                                    | 4  | 0.5 | E | 4 |
| 92410810 | 10000_Beverages | Soft drink, chocolate flavored                                                             | 4  | 0.5 | D | 4 |
| 92102450 | 10000_Beverages | Iced Coffee, pre-lightened and pre-sweetened                                               | 4  | 1.5 | D | 4 |
| 92305050 | 10000_Beverages | Tea, iced, instant, black, decaffeinated, pre-sweetened with sugar                         | 4  | 1   | D | 4 |
| 92309010 | 10000_Beverages | Tea, iced, bottled, black, decaffeinated                                                   | 4  | 0.5 | D | 4 |
| 92550035 | 10000_Beverages | Fruit juice drink, light                                                                   | 3  | 3   | D | 4 |
| 92552030 | 10000_Beverages | Fruit juice drink (Capri Sun)                                                              | 3  | 3   | D | 4 |
| 92121001 | 10000_Beverages | Coffee, instant, decaffeinated, pre-lightened and pre-sweetened with sugar, reconstituted  | 2  | 2   | C | 4 |
| 92130001 | 10000_Beverages | Coffee, decaffeinated, pre-lightened and pre-sweetened with sugar                          | 2  | 2   | C | 4 |
| 95310600 | 10000_Beverages | Energy drink (Red Bull)                                                                    | 2  | 0.5 | D | 4 |
| 95311000 | 10000_Beverages | Energy Drink                                                                               | 2  | 0.5 | D | 4 |
| 92121000 | 10000_Beverages | Coffee, instant, pre-lightened and pre-sweetened with sugar, reconstituted                 | 1  | 2   | C | 4 |
| 92130000 | 10000_Beverages | Coffee, pre-lightened and pre-sweetened with sugar                                         | 1  | 2   | C | 4 |
| 75200700 | 10000_Beverages | Aloe vera juice drink                                                                      | 1  | 2   | C | 4 |
| 92305910 | 10000_Beverages | Tea, iced, instant, green, pre-sweetened with sugar                                        | 1  | 1.5 | C | 4 |
| 92306100 | 10000_Beverages | Corn beverage                                                                              | 1  | 1.5 | D | 4 |
| 92309500 | 10000_Beverages | Tea, iced, bottled, green                                                                  | 1  | 1.5 | C | 4 |
| 92400000 | 10000_Beverages | Soft drink, NFS                                                                            | 1  | 0.5 | D | 4 |
| 92410310 | 10000_Beverages | Soft drink, cola                                                                           | 1  | 0.5 | D | 4 |
| 92410315 | 10000_Beverages | Soft drink, cola, reduced sugar                                                            | 1  | 2   | C | 4 |
| 92410340 | 10000_Beverages | Soft drink, cola, decaffeinated                                                            | 1  | 0.5 | D | 4 |
| 92410360 | 10000_Beverages | Soft drink, pepper type                                                                    | 1  | 0.5 | D | 4 |
| 92410390 | 10000_Beverages | Soft drink, pepper type, decaffeinated                                                     | 1  | 0.5 | D | 4 |
| 92410410 | 10000_Beverages | Soft drink, cream soda                                                                     | 1  | 0.5 | E | 4 |
| 92410510 | 10000_Beverages | Soft drink, fruit flavored, caffeine free                                                  | 1  | 0.5 | D | 4 |
| 92410550 | 10000_Beverages | Soft drink, fruit flavored, caffeine containing                                            | 1  | 0.5 | D | 4 |
| 92410610 | 10000_Beverages | Soft drink, ginger ale                                                                     | 1  | 1   | D | 4 |
| 92410710 | 10000_Beverages | Soft drink, root beer                                                                      | 1  | 0.5 | D | 4 |
| 92411510 | 10000_Beverages | Soft drink, cola, fruit or vanilla flavored                                                | 1  | 0.5 | D | 4 |
| 92411520 | 10000_Beverages | Soft drink, cola, chocolate flavored                                                       | 1  | 0.5 | D | 4 |
| 92510610 | 10000_Beverages | Fruit juice drink                                                                          | 1  | 3.5 | C | 4 |
| 92510955 | 10000_Beverages | Lemonade, fruit juice drink                                                                | 1  | 3.5 | D | 4 |
| 92510960 | 10000_Beverages | Lemonade, fruit flavored drink                                                             | 1  | 1.5 | C | 4 |
| 92511015 | 10000_Beverages | Fruit flavored drink                                                                       | 1  | 0.5 | E | 4 |
| 92512040 | 10000_Beverages | Frozen daiquiri mix, frozen concentrate, not reconstituted                                 | 1  | 0.5 | E | 4 |
| 92512050 | 10000_Beverages | Frozen daiquiri mix, from frozen concentrate, reconstituted                                | 1  | 0.5 | E | 4 |
| 92512110 | 10000_Beverages | Margarita mix, nonalcoholic                                                                | 1  | 0.5 | E | 4 |
| 92513000 | 10000_Beverages | Fruit flavored smoothie drink, frozen, no dairy                                            | 1  | 1.5 | C | 4 |
| 92513010 | 10000_Beverages | Fruit flavored smoothie drink, frozen, light, no dairy                                     | 1  | 3.5 | C | 4 |
| 92530410 | 10000_Beverages | Fruit flavored drink, with high vitamin C                                                  | 1  | 4   | C | 4 |
| 92541010 | 10000_Beverages | Fruit flavored drink, powdered, reconstituted                                              | 1  | 1.5 | C | 4 |
| 92582100 | 10000_Beverages | Fruit juice drink, with high vitamin C, plus added calcium                                 | 1  | 2   | D | 4 |

Supplementary Table 8. Original (uncorrected) scores for all food items.

|          |                 |                                                 |   |     |   |   |
|----------|-----------------|-------------------------------------------------|---|-----|---|---|
| 92612010 | 10000_Beverages | Sugar cane beverage                             | 1 | 0.5 | E | 4 |
| 92803000 | 10000_Beverages | Nonalcoholic malt beverage                      | 1 | 0.5 | D | 4 |
| 92804000 | 10000_Beverages | Shirley Temple                                  | 1 | 0.5 | E | 4 |
| 95310200 | 10000_Beverages | Energy drink (Full Throttle)                    | 1 | 0.5 | D | 4 |
| 95310400 | 10000_Beverages | Energy drink (Monster)                          | 1 | 0.5 | D | 4 |
| 95310500 | 10000_Beverages | Energy drink (Mountain Dew AMP)                 | 1 | 0.5 | D | 4 |
| 95310550 | 10000_Beverages | Energy drink (No Fear)                          | 1 | 0.5 | E | 4 |
| 95310555 | 10000_Beverages | Energy drink (No Fear Motherload)               | 1 | 0.5 | E | 4 |
| 95310560 | 10000_Beverages | Energy drink (NOS)                              | 1 | 0.5 | D | 4 |
| 95310750 | 10000_Beverages | Energy drink (SoBe Energize Energy Juice Drink) | 1 | 3.5 | D | 4 |
| 95310800 | 10000_Beverages | Energy drink (Vault)                            | 1 | 0.5 | D | 4 |
| 95320200 | 10000_Beverages | Sports drink (Gatorade G)                       | 1 | 1.5 | C | 4 |
| 95320500 | 10000_Beverages | Sports drink (Powerade)                         | 1 | 1   | D | 4 |
| 95321000 | 10000_Beverages | Sports drink, NFS                               | 1 | 1.5 | C | 4 |
| 95322200 | 10000_Beverages | Sports drink, low calorie (Gatorade G2)         | 1 | 3   | C | 4 |
| 95323000 | 10000_Beverages | Sports drink, low calorie                       | 1 | 3   | C | 4 |
| 95330100 | 10000_Beverages | Fluid replacement, electrolyte solution         | 1 | 3.5 | C | 4 |
| 95330500 | 10000_Beverages | Fluid replacement, 5% glucose in water          | 1 | 2   | C | 4 |



Supplementary Table 8. Original (uncorrected) scores for all food items.

| foodcode | level1nd    | Description                                                                   | Food Compass Score | Health Star Rating | Nutri-Score | NOVA Category |
|----------|-------------|-------------------------------------------------------------------------------|--------------------|--------------------|-------------|---------------|
| 57408100 | 1000_Grains | Cereal (Uncle Sam)                                                            | 100                | 5                  | A           | 4             |
| 57401100 | 1000_Grains | Cereal, toasted oat                                                           | 100                | 4                  | B           | 4             |
| 57000100 | 1000_Grains | Cereal, oat, NFS                                                              | 95                 | 4                  | B           | 4             |
| 57123000 | 1000_Grains | Cereal (General Mills Cheerios)                                               | 95                 | 4                  | B           | 4             |
| 57306700 | 1000_Grains | Cereal (Malt-O-Meal Toasted Oat Cereal)                                       | 95                 | 4                  | B           | 4             |
| 57305215 | 1000_Grains | Cereal (Malt-O-Meal Frosted Mini Spooners)                                    | 95                 | 4.5                | A           | 4             |
| 57416000 | 1000_Grains | Cereal, puffed wheat, plain                                                   | 91                 | 5                  | A           | 4             |
| 57206700 | 1000_Grains | Cereal (General Mills Fiber One)                                              | 87                 | 5                  | A           | 4             |
| 57214000 | 1000_Grains | Cereal (Kellogg's Frosted Mini-Wheats)                                        | 87                 | 4.5                | A           | 4             |
| 57406100 | 1000_Grains | Cereal (General Mills Total)                                                  | 84                 | 4                  | C           | 4             |
| 57231250 | 1000_Grains | Cereal (Post Great Grains Double Pecan Whole Grain Cereal)                    | 84                 | 4                  | C           | 4             |
| 57301500 | 1000_Grains | Cereal (Kashi 7 Whole Grain Puffs)                                            | 84                 | 5                  | A           | 4             |
| 57417000 | 1000_Grains | Cereal (Post Shredded Wheat)                                                  | 83                 | 5                  | A           | 4             |
| 57341000 | 1000_Grains | Cereal (Post Shredded Wheat'n Bran)                                           | 82                 | 5                  | A           | 4             |
| 56207200 | 1000_Grains | Whole wheat cereal, cooked, fat not added in cooking                          | 82                 | 3.5                | A           | 3             |
| 56204005 | 1000_Grains | Quinoa, fat not added in cooking                                              | 81                 | 4                  | A           | 4             |
| 57106050 | 1000_Grains | Cereal (Post Great Grains Banana Nut Crunch)                                  | 81                 | 4                  | B           | 4             |
| 57125010 | 1000_Grains | Cereal (General Mills 25% Less Sugar Cinnamon Toast Crunch)                   | 80                 | 3                  | C           | 4             |
| 56203086 | 1000_Grains | Oatmeal, instant, plain, made with water, fat not added in cooking            | 79                 | 4                  | A           | 4             |
| 56203106 | 1000_Grains | Oatmeal, instant, plain, made with non-dairy milk, fat not added in cooking   | 79                 | 4                  | A           | 4             |
| 56203056 | 1000_Grains | Oatmeal, regular or quick, made with water, fat not added in cooking          | 78                 | 4                  | A           | 3             |
| 56200300 | 1000_Grains | Cereal, cooked, NFS                                                           | 78                 | 4                  | A           | 3             |
| 56203000 | 1000_Grains | Oatmeal, NS as to regular, quick, or instant, fat not added in cooking        | 78                 | 4                  | A           | 3             |
| 57316385 | 1000_Grains | Cereal (General Mills Cheerios Protein)                                       | 78                 | 3.5                | C           | 4             |
| 57411000 | 1000_Grains | Cereal (General Mills Chex Wheat)                                             | 78                 | 4                  | C           | 4             |
| 57231200 | 1000_Grains | Cereal (Post Great Grains Raisins, Dates, and Pecans)                         | 77                 | 4                  | C           | 4             |
| 57207000 | 1000_Grains | Cereal, bran flakes                                                           | 77                 | 3.5                | C           | 4             |
| 57208000 | 1000_Grains | Cereal (Kellogg's All-Bran Complete Wheat Flakes)                             | 77                 | 3.5                | C           | 4             |
| 57332050 | 1000_Grains | Cereal (General Mills Total Raisin Bran)                                      | 77                 | 3                  | C           | 4             |
| 57206705 | 1000_Grains | Cereal (General Mills Fiber One Caramel Delight)                              | 77                 | 3.5                | C           | 4             |
| 57241000 | 1000_Grains | Cereal (General Mills Cheerios Honey Nut)                                     | 76                 | 3.5                | D           | 4             |
| 57305500 | 1000_Grains | Cereal (Malt-O-Meal Honey Nut Toasty O's)                                     | 76                 | 3.5                | D           | 4             |
| 57308190 | 1000_Grains | Cereal, muesli                                                                | 76                 | 4                  | C           | 4             |
| 57241200 | 1000_Grains | Cereal (Post Shredded Wheat Honey Nut)                                        | 76                 | 4                  | A           | 4             |
| 57301505 | 1000_Grains | Cereal (Kashi Autumn Wheat)                                                   | 76                 | 5                  | A           | 4             |
| 57143500 | 1000_Grains | Cereal (Post Great Grains, Cranberry Almond Crunch)                           | 75                 | 4                  | C           | 4             |
| 57327500 | 1000_Grains | Cereal (Quaker Oatmeal Squares)                                               | 75                 | 4                  | B           | 4             |
| 57308400 | 1000_Grains | Cereal (General Mills Cheerios Multigrain)                                    | 75                 | 3                  | C           | 4             |
| 57221810 | 1000_Grains | Cereal (General Mills Cheerios Fruity)                                        | 74                 | 3.5                | D           | 4             |
| 57418000 | 1000_Grains | Cereal (General Mills Wheaties)                                               | 74                 | 3                  | C           | 4             |
| 57307500 | 1000_Grains | Cereal, millet, puffed                                                        | 73                 | 4                  | A           | 4             |
| 56204000 | 1000_Grains | Quinoa, NS as to fat added in cooking                                         | 73                 | 3.5                | A           | 4             |
| 56204010 | 1000_Grains | Quinoa, fat added in cooking                                                  | 73                 | 3.5                | A           | 4             |
| 57228000 | 1000_Grains | Granola, homemade                                                             | 73                 | 3                  | C           | 4             |
| 57103100 | 1000_Grains | Cereal (General Mills Cheerios Apple Cinnamon)                                | 73                 | 3.5                | D           | 4             |
| 56200490 | 1000_Grains | Buckwheat groats, NS as to fat added in cooking                               | 73                 | 4                  | A           | 3             |
| 56200500 | 1000_Grains | Buckwheat groats, fat not added in cooking                                    | 73                 | 4                  | A           | 3             |
| 57213850 | 1000_Grains | Cereal (General Mills Cheerios Frosted)                                       | 73                 | 3.5                | D           | 4             |
| 56207370 | 1000_Grains | Wheat cereal, chocolate flavored, cooked                                      | 72                 | 3.5                | B           | 3             |
| 57330000 | 1000_Grains | Cereal (Kellogg's Raisin Bran)                                                | 72                 | 3.5                | C           | 4             |
| 57329000 | 1000_Grains | Cereal, raisin bran                                                           | 72                 | 3.5                | C           | 4             |
| 57237200 | 1000_Grains | Cereal (Post Honey Bunches of Oats with Vanilla Bunches)                      | 72                 | 4                  | B           | 4             |
| 57304100 | 1000_Grains | Cereal (Quaker Life)                                                          | 72                 | 3                  | C           | 4             |
| 57128005 | 1000_Grains | Cereal (General Mills 25% Less Sugar Cocoa Puffs)                             | 72                 | 3.5                | C           | 4             |
| 57335550 | 1000_Grains | Cereal (General Mills Reese's Puffs)                                          | 72                 | 1.5                | D           | 4             |
| 56203510 | 1000_Grains | Oatmeal, reduced sugar, plain, fat not added in cooking                       | 71                 | 3.5                | A           | 4             |
| 56203555 | 1000_Grains | Oatmeal, reduced sugar, flavored, fat not added in cooking                    | 71                 | 3.5                | A           | 4             |
| 57206800 | 1000_Grains | Cereal (Healt Valley Fiber 7 Flakes)                                          | 71                 | 4.5                | B           | 4             |
| 57124100 | 1000_Grains | Cereal (General Mills Cheerios Chocolate)                                     | 71                 | 2                  | D           | 4             |
| 51807000 | 1000_Grains | Injera, Ethiopian bread                                                       | 71                 | 3.5                | A           | 4             |
| 56203076 | 1000_Grains | Oatmeal, regular or quick, made with non-dairy milk, fat not added in cooking | 70                 | 3.5                | A           | 4             |
| 57316380 | 1000_Grains | Cereal (General Mills Cheerios Oat Cluster Crunch)                            | 70                 | 3.5                | C           | 4             |
| 57100100 | 1000_Grains | Cereal, ready-to-eat, NFS                                                     | 70                 | 3.5                | C           | 4             |
| 57332100 | 1000_Grains | Cereal (General Mills Raisin Nut Bran)                                        | 70                 | 3                  | C           | 4             |
| 56113000 | 1000_Grains | Noodles, whole grain, cooked                                                  | 70                 | 4                  | A           | 4             |
| 57106260 | 1000_Grains | Cereal (General Mills Cheerios Berry Burst)                                   | 70                 | 3.5                | D           | 4             |
| 53720100 | 1000_Grains | Nutrition bar (Balance Original Bar)                                          | 70                 | 2                  | D           | 4             |
| 57209000 | 1000_Grains | Cereal (Post Bran Flakes)                                                     | 70                 | 3.5                | C           | 4             |
| 57410000 | 1000_Grains | Cereal (Weetabix Whole Grain)                                                 | 70                 | 4.5                | A           | 4             |
| 56132990 | 1000_Grains | Pasta, whole grain, cooked                                                    | 70                 | 4                  | A           | 4             |
| 56205210 | 1000_Grains | Rice, wild, 100%, cooked, fat not added in cooking                            | 70                 | 3.5                | A           | 3             |
| 57102000 | 1000_Grains | Cereal (Alpen)                                                                | 69                 | 4.5                | A           | 4             |
| 57206710 | 1000_Grains | Cereal (General Mills Fiber One Honey Clusters)                               | 69                 | 4                  | C           | 4             |
| 56207110 | 1000_Grains | Bulgur, fat not added in cooking                                              | 69                 | 4                  | A           | 3             |
| 56207130 | 1000_Grains | Bulgur, NS as to fat added in cooking                                         | 69                 | 4                  | A           | 3             |
| 57124300 | 1000_Grains | Cereal (General Mills Lucky Charms Chocolate)                                 | 69                 | 2                  | D           | 4             |
| 57206715 | 1000_Grains | Cereal (General Mills Fiber One Raisin Bran Clusters)                         | 69                 | 4                  | C           | 4             |
| 56203610 | 1000_Grains | Oatmeal, multigrain, fat not added in cooking                                 | 68                 | 4                  | A           | 3             |
| 57231000 | 1000_Grains | Cereal (Post Grape-Nuts Flakes)                                               | 68                 | 4                  | C           | 4             |
| 57413000 | 1000_Grains | Wheat germ, with sugar and honey                                              | 68                 | 5                  | A           | 4             |
| 56203130 | 1000_Grains | Oatmeal, instant, maple flavored, fat not added in cooking                    | 67                 | 3.5                | B           | 4             |
| 56203175 | 1000_Grains | Oatmeal, instant, other flavors, fat not added in cooking                     | 67                 | 3.5                | B           | 4             |
| 53720700 | 1000_Grains | Nutrition bar (Tiger's Milk)                                                  | 67                 | 2                  | D           | 4             |
| 53720300 | 1000_Grains | Nutrition bar (PowerBar)                                                      | 67                 | 3.5                | C           | 4             |
| 57301530 | 1000_Grains | Cereal (Kashi Heart to Heart Honey Toasted Oat)                               | 67                 | 4.5                | A           | 4             |

Supplementary Table 8. Original (uncorrected) scores for all food items.

|          |             |                                                                                    |    |     |   |   |
|----------|-------------|------------------------------------------------------------------------------------|----|-----|---|---|
| 56200510 | 1000_Grains | Buckwheat groats, fat added in cooking                                             | 67 | 4   | A | 4 |
| 56205205 | 1000_Grains | Rice, wild, 100%, cooked, NS as to fat added in cooking                            | 67 | 3.5 | A | 4 |
| 56205215 | 1000_Grains | Rice, wild, 100%, cooked, fat added in cooking                                     | 67 | 3.5 | A | 4 |
| 57125000 | 1000_Grains | Cereal (General Mills Cinnamon Toast Crunch)                                       | 67 | 3.5 | D | 4 |
| 51320550 | 1000_Grains | Roll, whole wheat, hot dog bun                                                     | 66 | 4   | A | 4 |
| 51320560 | 1000_Grains | Roll, whole wheat, hamburger bun                                                   | 66 | 4   | A | 4 |
| 56203155 | 1000_Grains | Oatmeal, instant, fruit flavored, fat not added in cooking                         | 66 | 3.5 | B | 4 |
| 56207120 | 1000_Grains | Bulgur, fat added in cooking                                                       | 65 | 4   | A | 4 |
| 56203096 | 1000_Grains | Oatmeal, instant, plain, made with milk, fat not added in cooking                  | 65 | 4   | A | 4 |
| 57301512 | 1000_Grains | Cereal (Kashi GOLEAN Crunch Honey Almond Flax)                                     | 65 | 4.5 | B | 4 |
| 56201990 | 1000_Grains | Millet, NS as to fat added in cooking                                              | 65 | 3.5 | A | 3 |
| 56202000 | 1000_Grains | Millet, fat not added in cooking                                                   | 65 | 3.5 | A | 3 |
| 53720500 | 1000_Grains | Nutrition bar (Snickers Marathon Protein Bar)                                      | 65 | 3.5 | D | 4 |
| 56203105 | 1000_Grains | Oatmeal, instant, plain, made with non-dairy milk, NS as to fat added in cooking   | 65 | 3.5 | B | 4 |
| 56203107 | 1000_Grains | Oatmeal, instant, plain, made with non-dairy milk, fat added in cooking            | 65 | 3.5 | B | 4 |
| 57128000 | 1000_Grains | Cereal (General Mills Cocoa Puffs)                                                 | 64 | 2   | D | 4 |
| 51300110 | 1000_Grains | Bread, whole wheat                                                                 | 64 | 4   | A | 4 |
| 55300060 | 1000_Grains | French toast, from school, NFS                                                     | 63 | 4   | A | 4 |
| 55301048 | 1000_Grains | French toast sticks, from school, NFS                                              | 63 | 4   | A | 4 |
| 51300120 | 1000_Grains | Bread, whole wheat, toasted                                                        | 63 | 4   | A | 4 |
| 57206000 | 1000_Grains | Cereal (Famila)                                                                    | 63 | 4   | A | 4 |
| 57103000 | 1000_Grains | Cereal (Post Alpha-Bits)                                                           | 63 | 3.5 | C | 4 |
| 57301511 | 1000_Grains | Cereal (Kashi GOLEAN Crunch)                                                       | 63 | 4.5 | C | 4 |
| 57331000 | 1000_Grains | Cereal (Post Raisin Bran)                                                          | 63 | 3   | C | 4 |
| 57307010 | 1000_Grains | Cereal (Post Maple Pecan Crunch)                                                   | 63 | 3.5 | C | 4 |
| 57106060 | 1000_Grains | Cereal (General Mills Cheerios Banana Nut)                                         | 63 | 3.5 | D | 4 |
| 57320500 | 1000_Grains | Cereal (Quaker Granola with Oats, Honey, and Raisins)                              | 63 | 4   | C | 4 |
| 56205340 | 1000_Grains | Rice, brown and wild, cooked, fat added in cooking                                 | 63 | 3.5 | B | 4 |
| 57101000 | 1000_Grains | Cereal (Kellogg's All-Bran)                                                        | 63 | 5   | A | 4 |
| 51601020 | 1000_Grains | Bread, multigrain                                                                  | 63 | 4.5 | A | 4 |
| 51122300 | 1000_Grains | Bread, white, special formula, added fiber                                         | 62 | 4.5 | A | 4 |
| 51300050 | 1000_Grains | Bread, whole grain white                                                           | 62 | 4.5 | A | 4 |
| 57130000 | 1000_Grains | Cereal (General Mills Cookie Crisp)                                                | 62 | 2   | D | 4 |
| 56203085 | 1000_Grains | Oatmeal, instant, plain, made with water, NS as to fat added in cooking            | 62 | 3.5 | A | 4 |
| 56203087 | 1000_Grains | Oatmeal, instant, plain, made with water, fat added in cooking                     | 62 | 3.5 | A | 4 |
| 51601010 | 1000_Grains | Bread, multigrain, toasted                                                         | 62 | 4.5 | A | 4 |
| 57305165 | 1000_Grains | Cereal (Malt-O-Meal Cinnamon Toasters)                                             | 62 | 2   | D | 4 |
| 56205012 | 1000_Grains | Rice, brown, cooked, fat added in cooking, made with oil                           | 62 | 3.5 | B | 4 |
| 53720610 | 1000_Grains | Nutrition bar (South Beach Living High Protein Bar)                                | 62 | 3.5 | C | 4 |
| 57344025 | 1000_Grains | Cereal (Kellogg's Special K Cinnamon Pecan)                                        | 62 | 3   | D | 4 |
| 57107000 | 1000_Grains | Cereal (General Mills Boo Berry)                                                   | 61 | 3.5 | C | 4 |
| 57219000 | 1000_Grains | Cereal, fruit and fiber                                                            | 61 | 4   | C | 4 |
| 57221000 | 1000_Grains | Cereal, fiber and fruit                                                            | 61 | 4   | C | 4 |
| 51122310 | 1000_Grains | Bread, white, special formula, added fiber, toasted                                | 61 | 4.5 | A | 4 |
| 51300060 | 1000_Grains | Bread, whole grain white, toasted                                                  | 61 | 4.5 | A | 4 |
| 53710802 | 1000_Grains | Cereal or granola bar (Kashi Crunchy)                                              | 61 | 3.5 | C | 4 |
| 57110000 | 1000_Grains | Cereal (Kellogg's All-Bran Bran Buds)                                              | 61 | 3.5 | C | 4 |
| 51300140 | 1000_Grains | Bread, whole wheat, made from home recipe or purchased at bakery                   | 60 | 4   | B | 4 |
| 57211000 | 1000_Grains | Cereal (General Mills Frankenberry)                                                | 60 | 3.5 | C | 4 |
| 57139000 | 1000_Grains | Cereal (General Mills Count Chocula)                                               | 60 | 2   | D | 4 |
| 53710504 | 1000_Grains | Cereal or granola bar (Kellogg's Nutri-Grain Fruit and Nut Bar)                    | 60 | 3.5 | C | 4 |
| 57344007 | 1000_Grains | Cereal (Kellogg's Special K Low Fat Granola)                                       | 60 | 3   | C | 4 |
| 57229000 | 1000_Grains | Cereal (Kellogg's Low Fat Granola)                                                 | 60 | 3   | C | 4 |
| 52215260 | 1000_Grains | Tortilla, whole wheat                                                              | 60 | 4   | C | 4 |
| 56203075 | 1000_Grains | Oatmeal, regular or quick, made with non-dairy milk, NS as to fat added in cooking | 60 | 3.5 | A | 4 |
| 56203077 | 1000_Grains | Oatmeal, regular or quick, made with non-dairy milk, fat added in cooking          | 60 | 3.5 | A | 4 |
| 52104040 | 1000_Grains | Biscuit, whole wheat                                                               | 60 | 3.5 | D | 4 |
| 51300150 | 1000_Grains | Bread, whole wheat, made from home recipe or purchased at bakery, toasted          | 60 | 4   | C | 4 |
| 55105000 | 1000_Grains | Pancakes, buckwheat                                                                | 60 | 3   | B | 4 |
| 57237300 | 1000_Grains | Cereal (Post Honey Bunches of Oats with Almonds)                                   | 60 | 3.5 | C | 4 |
| 57419000 | 1000_Grains | Cereal (General Mills Cheerios Yogurt Burst)                                       | 60 | 3.5 | D | 4 |
| 57305100 | 1000_Grains | Cereal (General Mills Lucky Charms)                                                | 60 | 2   | D | 4 |
| 51601210 | 1000_Grains | Bread, multigrain, with raisins                                                    | 59 | 4   | A | 4 |
| 57316450 | 1000_Grains | Cereal (General Mills Oatmeal Crisp with Almonds)                                  | 59 | 4   | C | 4 |
| 56205016 | 1000_Grains | Rice, brown, cooked, fat added in cooking, made with margarine                     | 59 | 3.5 | B | 4 |
| 57227000 | 1000_Grains | Cereal, granola                                                                    | 59 | 3   | C | 4 |
| 57229500 | 1000_Grains | Cereal (Kellogg's Low Fat Granola with Raisins)                                    | 59 | 3   | C | 4 |
| 51601220 | 1000_Grains | Bread, multigrain, with raisins, toasted                                           | 59 | 4   | A | 4 |
| 51301600 | 1000_Grains | Bread, pita, whole wheat                                                           | 59 | 4   | A | 4 |
| 51301620 | 1000_Grains | Bread, pita, wheat or cracked wheat                                                | 59 | 4   | A | 4 |
| 57124050 | 1000_Grains | Cereal (General Mills Chex Cinnamon)                                               | 58 | 2   | D | 4 |
| 56202100 | 1000_Grains | Millet, fat added in cooking                                                       | 58 | 3.5 | B | 4 |
| 57201900 | 1000_Grains | Cereal (General Mills Dora The Explorer)                                           | 58 | 3   | C | 4 |
| 51301610 | 1000_Grains | Bread, pita, whole wheat, toasted                                                  | 58 | 4   | A | 4 |
| 51301630 | 1000_Grains | Bread, pita, wheat or cracked wheat, toasted                                       | 58 | 4   | A | 4 |
| 57137000 | 1000_Grains | Cereal, corn puffs                                                                 | 58 | 3.5 | C | 4 |
| 57303100 | 1000_Grains | Cereal (General Mills Kix)                                                         | 58 | 3.5 | C | 4 |
| 57106250 | 1000_Grains | Cereal (General Mills Kix Berry Berry)                                             | 58 | 3.5 | C | 4 |
| 51300180 | 1000_Grains | Bread, puri, wheat                                                                 | 58 | 3.5 | B | 4 |
| 56203095 | 1000_Grains | Oatmeal, instant, plain, made with milk, NS as to fat added in cooking             | 58 | 3.5 | B | 4 |
| 56203097 | 1000_Grains | Oatmeal, instant, plain, made with milk, fat added in cooking                      | 58 | 3.5 | B | 4 |
| 57327450 | 1000_Grains | Cereal (Quaker Toasted Oat Bran)                                                   | 57 | 4   | C | 4 |
| 57303105 | 1000_Grains | Cereal (General Mills Honey Kix)                                                   | 56 | 3   | C | 4 |
| 57230000 | 1000_Grains | Cereal (Post Grape-Nuts)                                                           | 56 | 4.5 | B | 4 |
| 57316200 | 1000_Grains | Cereal, nutty nuggets                                                              | 56 | 4.5 | B | 4 |
| 57301540 | 1000_Grains | Cereal (Kashi Honey Sunshine Squares)                                              | 56 | 4   | C | 4 |

Supplementary Table 8. Original (uncorrected) scores for all food items.

|          |             |                                                                                            |    |     |   |   |
|----------|-------------|--------------------------------------------------------------------------------------------|----|-----|---|---|
| 53720400 | 1000_Grains | Nutrition bar (Slim Fast Original Meal Bar)                                                | 56 | 2   | D | 4 |
| 53720600 | 1000_Grains | Nutrition bar (South Beach Living Meal Bar)                                                | 56 | 2   | D | 4 |
| 56205017 | 1000_Grains | Rice, brown, cooked, fat added in cooking, NS as to type of fat                            | 55 | 3.5 | B | 4 |
| 56205310 | 1000_Grains | Rice, brown and wild, cooked, fat not added in cooking                                     | 55 | 3.5 | B | 4 |
| 56205018 | 1000_Grains | Rice, brown, cooked, fat not added in cooking                                              | 55 | 3.5 | B | 4 |
| 57237900 | 1000_Grains | Cereal (Post Honey Bunches of Oats Just Bunches)                                           | 55 | 3.5 | C | 4 |
| 57237100 | 1000_Grains | Cereal (Post Honey Bunches of Oats Honey Roasted)                                          | 55 | 3.5 | C | 4 |
| 56205011 | 1000_Grains | Rice, brown, cooked, NS as to fat added in cooking                                         | 55 | 3.5 | B | 4 |
| 56207190 | 1000_Grains | Whole wheat cereal, cooked, NS as to fat added in cooking                                  | 54 | 3.5 | A | 4 |
| 56207210 | 1000_Grains | Whole wheat cereal, cooked, fat added in cooking                                           | 54 | 3.5 | A | 4 |
| 55200060 | 1000_Grains | Waffle, whole grain, from frozen                                                           | 54 | 3.5 | B | 4 |
| 56203066 | 1000_Grains | Oatmeal, regular or quick, made with milk, fat not added in cooking                        | 54 | 3.5 | A | 4 |
| 56203500 | 1000_Grains | Oatmeal, reduced sugar, plain, NS as to fat added in cooking                               | 54 | 3.5 | B | 4 |
| 56203520 | 1000_Grains | Oatmeal, reduced sugar, plain, fat added in cooking                                        | 54 | 3.5 | B | 4 |
| 56203550 | 1000_Grains | Oatmeal, reduced sugar, flavored, NS as to fat added in cooking                            | 54 | 3.5 | B | 4 |
| 56203560 | 1000_Grains | Oatmeal, reduced sugar, flavored, fat added in cooking                                     | 54 | 3.5 | B | 4 |
| 55200080 | 1000_Grains | Waffle, whole grain, fruit, from frozen                                                    | 54 | 3.5 | B | 4 |
| 57341200 | 1000_Grains | Cereal (Kellogg's Smart Start Strong)                                                      | 54 | 3.5 | C | 4 |
| 56203055 | 1000_Grains | Oatmeal, regular or quick, made with water, NS as to fat added in cooking                  | 54 | 4   | A | 4 |
| 56203057 | 1000_Grains | Oatmeal, regular or quick, made with water, fat added in cooking                           | 54 | 4   | A | 4 |
| 56202960 | 1000_Grains | Oatmeal, NS as to regular, quick, or instant, NS as to fat added in cooking                | 54 | 4   | A | 4 |
| 56203040 | 1000_Grains | Oatmeal, NS as to regular, quick, or instant, fat added in cooking                         | 54 | 4   | A | 4 |
| 53720800 | 1000_Grains | Nutrition bar (Zone Perfect Classic Crunch)                                                | 53 | 1.5 | D | 4 |
| 53729000 | 1000_Grains | Nutrition bar or meal replacement bar, NFS                                                 | 53 | 1.5 | D | 4 |
| 55100070 | 1000_Grains | Pancakes, whole grain and nuts, from fast food / restaurant                                | 53 | 3.5 | C | 4 |
| 57321900 | 1000_Grains | Cereal (Nature's Path Organic Flax Plus)                                                   | 53 | 4.5 | C | 4 |
| 53712210 | 1000_Grains | Cereal or granola bar, nonfat                                                              | 52 | 3.5 | C | 4 |
| 57124030 | 1000_Grains | Cereal (General Mills Chex Chocolate)                                                      | 52 | 1.5 | D | 4 |
| 57237310 | 1000_Grains | Cereal (Post Honey Bunches of Oats wth Pecan Bunches)                                      | 52 | 3.5 | C | 4 |
| 57301510 | 1000_Grains | Cereal (Kashi GOLEAN)                                                                      | 52 | 5   | A | 4 |
| 53710500 | 1000_Grains | Cereal or granola bar (Kellogg's Nutri-Grain Cereal Bar)                                   | 52 | 2   | C | 4 |
| 53710502 | 1000_Grains | Cereal or granola bar (Kellogg's Nutri-Grain Yogurt Bar)                                   | 52 | 2   | C | 4 |
| 57344015 | 1000_Grains | Cereal (Kellogg's Special K Fruit & Yogurt)                                                | 52 | 3.5 | D | 4 |
| 56203125 | 1000_Grains | Oatmeal, instant, maple flavored, NS as to fat added in cooking                            | 52 | 3.5 | B | 4 |
| 56203135 | 1000_Grains | Oatmeal, instant, maple flavored, fat added in cooking                                     | 52 | 3.5 | B | 4 |
| 56203170 | 1000_Grains | Oatmeal, instant, other flavors, NS as to fat added in cooking                             | 52 | 3.5 | B | 4 |
| 56203180 | 1000_Grains | Oatmeal, instant, other flavors, fat added in cooking                                      | 52 | 3.5 | B | 4 |
| 52303010 | 1000_Grains | Muffin, whole wheat                                                                        | 51 | 2   | D | 4 |
| 55100040 | 1000_Grains | Pancakes, gluten free, from frozen                                                         | 51 | 3.5 | B | 4 |
| 55106000 | 1000_Grains | Pancakes, gluten free                                                                      | 51 | 3.5 | B | 4 |
| 55200200 | 1000_Grains | Waffle, from school, NFS                                                                   | 51 | 3.5 | B | 4 |
| 56203065 | 1000_Grains | Oatmeal, regular or quick, made with milk, NS as to fat added in cooking                   | 51 | 3.5 | B | 4 |
| 56203067 | 1000_Grains | Oatmeal, regular or quick, made with milk, fat added in cooking                            | 51 | 3.5 | B | 4 |
| 57305150 | 1000_Grains | Cereal, frosted oat cereal with marshmallows                                               | 51 | 2   | D | 4 |
| 56203150 | 1000_Grains | Oatmeal, instant, fruit flavored, NS as to fat added in cooking                            | 51 | 3.5 | B | 4 |
| 56203160 | 1000_Grains | Oatmeal, instant, fruit flavored, fat added in cooking                                     | 51 | 3.5 | B | 4 |
| 56202900 | 1000_Grains | Oatmeal, from fast food, plain                                                             | 51 | 3.5 | A | 4 |
| 57305600 | 1000_Grains | Cereal (Malt-O-Meal Marshmallow Mateys)                                                    | 50 | 1.5 | D | 4 |
| 55200070 | 1000_Grains | Waffle, whole grain, reduced fat, from frozen                                              | 50 | 3.5 | B | 4 |
| 53710902 | 1000_Grains | Cereal or granola bar, with yogurt coating (General Mills Nature Valley Chewy Granola Bar) | 50 | 2   | D | 4 |
| 55200090 | 1000_Grains | Waffle, gluten free, from frozen                                                           | 50 | 3   | C | 4 |
| 55208000 | 1000_Grains | Waffle, gluten free                                                                        | 50 | 3   | C | 4 |
| 57344020 | 1000_Grains | Cereal (Kellogg's Special K Vanilla Almond)                                                | 50 | 3.5 | D | 4 |
| 51300210 | 1000_Grains | Bread, whole wheat, with raisins                                                           | 50 | 3   | C | 4 |
| 51806010 | 1000_Grains | Bread, rice                                                                                | 49 | 3.5 | B | 4 |
| 51808000 | 1000_Grains | Bread, gluten free                                                                         | 49 | 3.5 | B | 4 |
| 57106100 | 1000_Grains | Cereal (General Mills Basic 4)                                                             | 49 | 3   | C | 4 |
| 56205350 | 1000_Grains | Rice, brown and wild, cooked, NS as to fat added in cooking                                | 49 | 3   | C | 4 |
| 51300220 | 1000_Grains | Bread, whole wheat, with raisins, toasted                                                  | 49 | 3   | C | 4 |
| 57316300 | 1000_Grains | Cereal (Health Valley Oat Bran Flakes)                                                     | 49 | 3   | C | 4 |
| 53720200 | 1000_Grains | Nutrition bar (Clif Bar)                                                                   | 49 | 3   | C | 4 |
| 57104000 | 1000_Grains | Cereal (Kellogg's Apple Jacks)                                                             | 49 | 3.5 | D | 4 |
| 51806020 | 1000_Grains | Bread, rice, toasted                                                                       | 49 | 3   | B | 4 |
| 51808010 | 1000_Grains | Bread, gluten free, toasted                                                                | 49 | 3   | B | 4 |
| 71945020 | 1000_Grains | Yam buns; Puerto Rican style                                                               | 49 | 4   | C | 4 |
| 58174000 | 1000_Grains | Upma, Indian breakfast dish                                                                | 48 | 4.5 | B | 4 |
| 57407100 | 1000_Grains | Cereal (General Mills Trix)                                                                | 48 | 2   | D | 4 |
| 57407110 | 1000_Grains | Cereal (General Mills 25% Less Sugar Trix)                                                 | 48 | 3.5 | C | 4 |
| 57316500 | 1000_Grains | Cereal (General Mills Oatmeal Crisp with Raisins)                                          | 48 | 3.5 | C | 4 |
| 53710400 | 1000_Grains | Cereal or granola bar (General Mills Fiber One Chewy Bar)                                  | 47 | 3.5 | C | 4 |
| 53714300 | 1000_Grains | Cereal or granola bar, high fiber, coated with non-chocolate yogurt coating                | 47 | 3.5 | C | 4 |
| 53710900 | 1000_Grains | Cereal or granola bar (General Mills Nature Valley Chewy Trail Mix)                        | 47 | 2   | D | 4 |
| 57301535 | 1000_Grains | Cereal (Kashi Heart to Heart Oat Flakes and Blueberry Clusters)                            | 47 | 4   | C | 4 |
| 57143000 | 1000_Grains | Cereal (Kellogg's Cracklin' Oat Bran)                                                      | 47 | 3.5 | D | 4 |
| 57305160 | 1000_Grains | Cereal (Malt-O-Meal Blueberry Muffin Tops)                                                 | 47 | 2   | D | 4 |
| 57305400 | 1000_Grains | Cereal (Malt-O-Meal Honey Graham Squares)                                                  | 47 | 2   | D | 4 |
| 57306130 | 1000_Grains | Cereal (Malt-O-Meal Raisin Bran)                                                           | 47 | 3.5 | D | 4 |
| 57224000 | 1000_Grains | Cereal (General Mills Golden Grahams)                                                      | 47 | 2   | D | 4 |
| 56203600 | 1000_Grains | Oatmeal, multigrain, NS as to fat added in cooking                                         | 47 | 4   | A | 4 |
| 56203620 | 1000_Grains | Oatmeal, multigrain, fat added in cooking                                                  | 47 | 4   | A | 4 |
| 55200130 | 1000_Grains | Waffle, whole grain, from fast food / restaurant                                           | 46 | 1.5 | D | 4 |
| 57409100 | 1000_Grains | Cereal (Post Waffle Crisp)                                                                 | 46 | 2   | D | 4 |
| 57213010 | 1000_Grains | Cereal (Kellogg's Froot Loops Marshmallow)                                                 | 46 | 2   | D | 4 |
| 57132000 | 1000_Grains | Cereal (General Mills Chex Corn)                                                           | 45 | 3.5 | C | 4 |
| 57344001 | 1000_Grains | Cereal (Kellogg's Special K Blueberry)                                                     | 45 | 3   | C | 4 |
| 57330010 | 1000_Grains | Cereal (Kellogg's Raisin Bran Crunch)                                                      | 45 | 3.5 | C | 4 |

Supplementary Table 8. Original (uncorrected) scores for all food items.

|          |             |                                                                                           |    |     |   |   |
|----------|-------------|-------------------------------------------------------------------------------------------|----|-----|---|---|
| 57213000 | 1000_Grains | Cereal (Kellogg's Froot Loops)                                                            | 45 | 3.5 | D | 4 |
| 57221700 | 1000_Grains | Cereal, fruit rings                                                                       | 45 | 3.5 | D | 4 |
| 57221800 | 1000_Grains | Cereal, fruit whirls                                                                      | 45 | 3.5 | D | 4 |
| 51123010 | 1000_Grains | Bread, high protein                                                                       | 44 | 4   | A | 4 |
| 56207102 | 1000_Grains | Cream of wheat, instant, made with non-dairy milk, fat not added in cooking               | 44 | 3.5 | B | 4 |
| 57240100 | 1000_Grains | Cereal (General Mills Chex Honey Nut)                                                     | 44 | 2   | D | 4 |
| 57336000 | 1000_Grains | Cereal (General Mills Chex Rice)                                                          | 44 | 3.5 | D | 4 |
| 51301540 | 1000_Grains | Bread, French or Vienna, whole wheat                                                      | 44 | 4   | A | 4 |
| 56205014 | 1000_Grains | Rice, brown, cooked, fat added in cooking, made with butter                               | 44 | 3.5 | B | 4 |
| 51123020 | 1000_Grains | Bread, high protein, toasted                                                              | 43 | 4   | A | 4 |
| 57355000 | 1000_Grains | Cereal (Post Golden Crisp)                                                                | 43 | 2   | C | 4 |
| 57124200 | 1000_Grains | Cereal, chocolate flavored, frosted, puffed corn                                          | 43 | 1.5 | D | 4 |
| 57344010 | 1000_Grains | Cereal (Kellogg's Special K Red Berries)                                                  | 43 | 3.5 | D | 4 |
| 57124900 | 1000_Grains | Cereal (Kellogg's Cinnabon)                                                               | 42 | 1.5 | D | 4 |
| 51301550 | 1000_Grains | Bread, French or Vienna, whole wheat, toasted                                             | 42 | 4   | A | 4 |
| 53710906 | 1000_Grains | Cereal or granola bar (General Mills Nature Valley Crunchy Granola Bar)                   | 42 | 2   | D | 4 |
| 53712100 | 1000_Grains | Cereal or Granola bar, NFS                                                                | 42 | 2   | D | 4 |
| 53713100 | 1000_Grains | Cereal or granola bar, peanuts , oats, sugar, wheat germ                                  | 42 | 2   | D | 4 |
| 55100065 | 1000_Grains | Pancakes, whole grain, from fast food / restaurant                                        | 42 | 2   | D | 4 |
| 55205000 | 1000_Grains | Waffle, whole grain                                                                       | 42 | 2   | D | 4 |
| 51102010 | 1000_Grains | Bread, white with whole wheat swirl                                                       | 42 | 4   | A | 4 |
| 57301520 | 1000_Grains | Cereal (Kashi Good Friends)                                                               | 41 | 5   | A | 4 |
| 57344005 | 1000_Grains | Cereal (Kellogg's Special K Chocolatey Delight)                                           | 41 | 2   | D | 4 |
| 57106530 | 1000_Grains | Cereal (Post Selects Blueberry Morning)                                                   | 41 | 3.5 | C | 4 |
| 51300175 | 1000_Grains | Bread, chappatti or roti, wheat                                                           | 41 | 4   | B | 4 |
| 57305170 | 1000_Grains | Cereal (Malt-O-Meal Coco-Roos)                                                            | 40 | 1.5 | D | 4 |
| 57303200 | 1000_Grains | Cereal (Kellogg's Krave)                                                                  | 40 | 2   | D | 4 |
| 56207026 | 1000_Grains | Cream of wheat, regular or quick, made with non-dairy milk, fat not added in cooking      | 40 | 3.5 | B | 4 |
| 57125900 | 1000_Grains | Cereal (General Mills Honey Nut Clusters)                                                 | 40 | 3.5 | C | 4 |
| 56208500 | 1000_Grains | Oat bran cereal, cooked, fat not added in cooking                                         | 40 | 4   | A | 4 |
| 41425010 | 1000_Grains | Vermicelli, made from soybeans                                                            | 40 | 3.5 | B | 4 |
| 51102020 | 1000_Grains | Bread, white with whole wheat swirl, toasted                                              | 39 | 4   | B | 4 |
| 55212000 | 1000_Grains | Waffle, whole grain, reduced fat                                                          | 38 | 2   | D | 4 |
| 57323000 | 1000_Grains | Cereal (Quaker Sweet Crunch)                                                              | 38 | 0.5 | E | 4 |
| 57328000 | 1000_Grains | Cereal (Quaker Quisp)                                                                     | 38 | 0.5 | E | 4 |
| 53710904 | 1000_Grains | Cereal or granola bar (General Mills Nature Valley Sweet and Salty Granola Bar)           | 38 | 1   | E | 4 |
| 55105200 | 1000_Grains | Pancakes, whole grain                                                                     | 38 | 2   | D | 4 |
| 57243000 | 1000_Grains | Cereal (Kellogg's Honey Smacks)                                                           | 37 | 2   | C | 4 |
| 57306500 | 1000_Grains | Cereal (Malt-O-Meal Golden Puffs)                                                         | 37 | 2   | C | 4 |
| 57416010 | 1000_Grains | Cereal, puffed wheat, sweetened                                                           | 37 | 2   | C | 4 |
| 51404010 | 1000_Grains | Bread, pumpernickel                                                                       | 37 | 4   | A | 4 |
| 51404550 | 1000_Grains | Muffin, English, pumpernickel                                                             | 37 | 4   | A | 4 |
| 51407010 | 1000_Grains | Bread, black                                                                              | 37 | 4   | A | 4 |
| 55300040 | 1000_Grains | French toast, gluten free, from frozen                                                    | 37 | 3.5 | B | 4 |
| 57120000 | 1000_Grains | Cereal (Quaker Cap'n Crunch's Peanut Butter Crunch)                                       | 36 | 1   | E | 4 |
| 55105205 | 1000_Grains | Pancakes, whole grain, reduced fat                                                        | 36 | 3.5 | C | 4 |
| 51404020 | 1000_Grains | Bread, pumpernickel, toasted                                                              | 36 | 4   | B | 4 |
| 51407020 | 1000_Grains | Bread, black, toasted                                                                     | 36 | 4   | B | 4 |
| 51808100 | 1000_Grains | Roll, gluten free                                                                         | 36 | 3.5 | B | 4 |
| 75217500 | 1000_Grains | Hominy, cooked, fat not added in cooking                                                  | 36 | 4   | C | 3 |
| 53711002 | 1000_Grains | Cereal or granola bar (Quaker Chewy 90 Calorie Granola Bar)                               | 36 | 2   | D | 4 |
| 53712200 | 1000_Grains | Cereal or granola bar, lowfat, NFS                                                        | 36 | 2   | D | 4 |
| 55301025 | 1000_Grains | French toast, gluten free                                                                 | 35 | 3   | C | 4 |
| 53711000 | 1000_Grains | Cereal or granola bar (Quaker Chewy Granola Bar)                                          | 35 | 1.5 | D | 4 |
| 56201066 | 1000_Grains | Grits, regular or quick, made with non-dairy milk, fat not added in cooking               | 35 | 3.5 | B | 4 |
| 55300030 | 1000_Grains | French toast, whole grain, from frozen                                                    | 35 | 3.5 | A | 4 |
| 56208510 | 1000_Grains | Oat bran cereal, cooked, fat added in cooking                                             | 35 | 4   | A | 4 |
| 56208520 | 1000_Grains | Oat bran cereal, cooked, NS as to fat added in cooking                                    | 35 | 4   | A | 4 |
| 51301510 | 1000_Grains | Bread, wheat or cracked wheat, reduced calorie and/or high fiber                          | 34 | 5   | A | 4 |
| 51401060 | 1000_Grains | Bread, rye, reduced calorie and/or high fiber                                             | 34 | 5   | A | 4 |
| 51501060 | 1000_Grains | Bread, oat bran, reduced calorie and/or high fiber                                        | 34 | 5   | A | 4 |
| 51602010 | 1000_Grains | Bread, multigrain, reduced calorie and/or high fiber                                      | 34 | 5   | A | 4 |
| 53714230 | 1000_Grains | Cereal or granola bar, oats, nuts, coated with non-chocolate coating                      | 34 | 1.5 | D | 4 |
| 56201355 | 1000_Grains | Grits, instant, made with non-dairy milk, fat not added in cooking                        | 34 | 3.5 | B | 4 |
| 57309100 | 1000_Grains | Cereal (Nature Valley Granola)                                                            | 34 | 3.5 | D | 4 |
| 55301020 | 1000_Grains | French toast, whole grain, reduced fat                                                    | 34 | 3.5 | B | 4 |
| 53712000 | 1000_Grains | Snack bar, oatmeal                                                                        | 34 | 2   | D | 4 |
| 55100080 | 1000_Grains | Pancakes, from school, NFS                                                                | 33 | 3.5 | B | 4 |
| 55301015 | 1000_Grains | French toast, whole grain                                                                 | 33 | 3   | C | 4 |
| 55301055 | 1000_Grains | French toast sticks, whole grain                                                          | 33 | 3   | C | 4 |
| 53714500 | 1000_Grains | Breakfast bar, NFS                                                                        | 33 | 2   | D | 4 |
| 53714520 | 1000_Grains | Breakfast bar, cereal crust with fruit filling, lowfat                                    | 33 | 2   | D | 4 |
| 51301520 | 1000_Grains | Bread, wheat or cracked wheat, reduced calorie and/or high fiber, toasted                 | 33 | 5   | A | 4 |
| 51401070 | 1000_Grains | Bread, rye, reduced calorie and/or high fiber, toasted                                    | 33 | 5   | A | 4 |
| 51501070 | 1000_Grains | Bread, oat bran, reduced calorie and/or high fiber, toasted                               | 33 | 5   | A | 4 |
| 51602020 | 1000_Grains | Bread, multigrain, reduced calorie and/or high fiber, toasted                             | 33 | 5   | A | 4 |
| 55702100 | 1000_Grains | Dosa (Indian), plain                                                                      | 33 | 4   | B | 4 |
| 56207101 | 1000_Grains | Cream of wheat, instant, made with non-dairy milk, NS as to fat added in cooking          | 32 | 3   | C | 4 |
| 56207103 | 1000_Grains | Cream of wheat, instant, made with non-dairy milk, fat added in cooking                   | 32 | 3   | C | 4 |
| 53710800 | 1000_Grains | Cereal or granola bar (Kashi Chewy)                                                       | 32 | 2   | D | 4 |
| 56116990 | 1000_Grains | Long rice noodles, made from mung beans, cooked                                           | 32 | 4.5 | A | 4 |
| 56207025 | 1000_Grains | Cream of wheat, regular or quick, made with non-dairy milk, NS as to fat added in cooking | 31 | 3.5 | B | 4 |
| 56207027 | 1000_Grains | Cream of wheat, regular or quick, made with non-dairy milk, fat added in cooking          | 31 | 3.5 | B | 4 |
| 53714250 | 1000_Grains | Cereal or granola bar, coated with non-chocolate coating                                  | 30 | 0.5 | E | 4 |
| 51503040 | 1000_Grains | Muffin, English, oat bran, with raisins                                                   | 30 | 3.5 | B | 4 |
| 51108100 | 1000_Grains | Naan, Indian flatbread                                                                    | 30 | 3.5 | C | 4 |

Supplementary Table 8. Original (uncorrected) scores for all food items.

|          |             |                                                                                  |    |     |   |   |
|----------|-------------|----------------------------------------------------------------------------------|----|-----|---|---|
| 51300185 | 1000_Grains | Bread, paratha, wheat                                                            | 30 | 3   | C | 4 |
| 51320700 | 1000_Grains | Roll, whole grain white                                                          | 30 | 3   | C | 4 |
| 51320710 | 1000_Grains | Roll, whole grain white, hot dog bun                                             | 30 | 3   | C | 4 |
| 51320720 | 1000_Grains | Roll, whole grain white, hamburger bun                                           | 30 | 3   | C | 4 |
| 55300055 | 1000_Grains | French toast, whole grain, from fast food / restaurant                           | 29 | 3.5 | C | 4 |
| 53711004 | 1000_Grains | Cereal or granola bar (Quaker Chewy 25% Less Sugar Granola Bar)                  | 29 | 2   | D | 4 |
| 53713000 | 1000_Grains | Cereal or granola bar, reduced sugar, NFS                                        | 29 | 2   | D | 4 |
| 57302100 | 1000_Grains | Cereal (Quaker King Vitamin)                                                     | 29 | 2   | D | 4 |
| 55200040 | 1000_Grains | Waffle, fruit, from frozen                                                       | 29 | 3   | C | 4 |
| 55200010 | 1000_Grains | Waffle, NFS                                                                      | 29 | 3   | C | 4 |
| 55200020 | 1000_Grains | Waffle, plain, from frozen                                                       | 29 | 3   | C | 4 |
| 53720210 | 1000_Grains | Nutrition bar (Clif Kids Organic Zbar)                                           | 29 | 3.5 | D | 4 |
| 57238000 | 1000_Grains | Cereal (Post Honeycomb)                                                          | 29 | 2   | D | 4 |
| 56207022 | 1000_Grains | Cream of wheat, regular or quick, made with milk, fat not added in cooking       | 28 | 3.5 | B | 4 |
| 51501010 | 1000_Grains | Bread, oatmeal                                                                   | 28 | 3.5 | A | 4 |
| 51502010 | 1000_Grains | Roll, oatmeal                                                                    | 28 | 3.5 | A | 4 |
| 51503000 | 1000_Grains | Muffin, English, oat bran                                                        | 28 | 3.5 | A | 4 |
| 51501040 | 1000_Grains | Bread, oat bran                                                                  | 28 | 3.5 | B | 4 |
| 52304000 | 1000_Grains | Muffin, whole grain                                                              | 28 | 2   | D | 4 |
| 52303500 | 1000_Grains | Muffin, wheat                                                                    | 28 | 2   | D | 4 |
| 55200120 | 1000_Grains | Waffle, fruit, from fast food / restaurant                                       | 28 | 2   | D | 4 |
| 51501020 | 1000_Grains | Bread, oatmeal, toasted                                                          | 27 | 3.5 | A | 4 |
| 51501050 | 1000_Grains | Bread, oat bran, toasted                                                         | 27 | 3.5 | A | 4 |
| 51302520 | 1000_Grains | Muffin, English, wheat bran, with raisins                                        | 27 | 4   | A | 4 |
| 57126000 | 1000_Grains | Cereal (Kellogg's Cocoa Krispies)                                                | 27 | 1.5 | D | 4 |
| 52405010 | 1000_Grains | Bread, fruit                                                                     | 27 | 2   | D | 4 |
| 55200100 | 1000_Grains | Waffle, plain, from fast food / restaurant                                       | 26 | 1.5 | D | 4 |
| 51184250 | 1000_Grains | Breadsticks, soft, topped with melted cheese                                     | 26 | 2   | D | 4 |
| 51184260 | 1000_Grains | Breadsticks, soft, stuffed with melted cheese                                    | 26 | 2   | D | 4 |
| 57131000 | 1000_Grains | Cereal (Quaker Corn Bran Crunch)                                                 | 26 | 3   | D | 4 |
| 57305174 | 1000_Grains | Cereal (Malt-O-Meal Colossal Crunch)                                             | 26 | 1   | E | 4 |
| 52304150 | 1000_Grains | Muffin, oat bran                                                                 | 26 | 3.5 | B | 4 |
| 56140100 | 1000_Grains | Pasta, gluten free                                                               | 26 | 3.5 | B | 3 |
| 56201065 | 1000_Grains | Grits, regular or quick, made with non-dairy milk, NS as to fat added in cooking | 26 | 3.5 | B | 4 |
| 56201067 | 1000_Grains | Grits, regular or quick, made with non-dairy milk, fat added in cooking          | 26 | 3.5 | B | 4 |
| 51320010 | 1000_Grains | Roll, wheat or cracked wheat                                                     | 26 | 3.5 | A | 4 |
| 51320500 | 1000_Grains | Roll, whole wheat                                                                | 26 | 3.5 | A | 4 |
| 56207095 | 1000_Grains | Cream of wheat, instant, made with milk, fat not added in cooking                | 26 | 3.5 | B | 4 |
| 51303050 | 1000_Grains | Muffin, English, wheat or cracked wheat, with raisins                            | 26 | 4   | A | 4 |
| 51303070 | 1000_Grains | Muffin, English, whole wheat, with raisins                                       | 26 | 4   | A | 4 |
| 52403000 | 1000_Grains | Bread, nut                                                                       | 26 | 2   | D | 4 |
| 51801010 | 1000_Grains | Bread, barley                                                                    | 25 | 3.5 | A | 4 |
| 52401000 | 1000_Grains | Bread, Boston Brown                                                              | 25 | 3.5 | A | 4 |
| 51301010 | 1000_Grains | Bread, wheat or cracked wheat                                                    | 25 | 3.5 | A | 4 |
| 56207021 | 1000_Grains | Cream of wheat, regular or quick, made with milk, NS as to fat added in cooking  | 25 | 3   | C | 4 |
| 56207023 | 1000_Grains | Cream of wheat, regular or quick, made with milk, fat added in cooking           | 25 | 3   | C | 4 |
| 57306800 | 1000_Grains | Cereal (Malt-O-Meal Tootie Fruities)                                             | 25 | 1.5 | D | 4 |
| 55100030 | 1000_Grains | Pancakes, whole grain, from frozen                                               | 25 | 3   | B | 4 |
| 55100035 | 1000_Grains | Pancakes, whole grain, reduced fat, from frozen                                  | 25 | 3   | B | 4 |
| 56201350 | 1000_Grains | Grits, instant, made with non-dairy milk, NS as to fat added in cooking          | 25 | 3   | C | 4 |
| 56201360 | 1000_Grains | Grits, instant, made with non-dairy milk, fat added in cooking                   | 25 | 3   | C | 4 |
| 55200050 | 1000_Grains | Waffle, chocolate, from frozen                                                   | 25 | 3   | C | 4 |
| 51801020 | 1000_Grains | Bread, barley, toasted                                                           | 25 | 4   | A | 4 |
| 51301020 | 1000_Grains | Bread, wheat or cracked wheat, toasted                                           | 25 | 4   | A | 4 |
| 57349020 | 1000_Grains | Cereal (Kellogg's Frosted Flakes, Reduced Sugar)                                 | 24 | 3   | C | 4 |
| 57347000 | 1000_Grains | Cereal (Kellogg's Corn Pops)                                                     | 24 | 3   | C | 4 |
| 52304100 | 1000_Grains | Muffin, oatmeal                                                                  | 24 | 2   | D | 4 |
| 51320060 | 1000_Grains | Roll, wheat or cracked wheat, hot dog bun                                        | 24 | 4   | A | 4 |
| 51320070 | 1000_Grains | Roll, wheat or cracked wheat, hamburger bun                                      | 24 | 4   | A | 4 |
| 52306300 | 1000_Grains | Muffin, cheese                                                                   | 24 | 2   | D | 4 |
| 57325000 | 1000_Grains | Cereal (Kellogg's Product 19)                                                    | 24 | 2   | D | 4 |
| 56207094 | 1000_Grains | Cream of wheat, instant, made with milk, fat added in cooking                    | 24 | 3.5 | B | 4 |
| 56207096 | 1000_Grains | Cream of wheat, instant, made with milk, NS as to fat added in cooking           | 24 | 3.5 | B | 4 |
| 56202905 | 1000_Grains | Oatmeal, from fast food, maple flavored                                          | 24 | 3.5 | B | 4 |
| 56202920 | 1000_Grains | Oatmeal, from fast food, other flavors                                           | 24 | 3.5 | B | 4 |
| 56201340 | 1000_Grains | Grits, instant, made with milk, fat added in cooking                             | 24 | 3   | B | 4 |
| 56201344 | 1000_Grains | Grits, instant, made with milk, NS as to fat added in cooking                    | 24 | 3   | B | 4 |
| 56201342 | 1000_Grains | Grits, instant, made with milk, fat not added in cooking                         | 24 | 3.5 | B | 4 |
| 51301820 | 1000_Grains | Bagel, wheat, with fruit and nuts                                                | 24 | 3.5 | A | 4 |
| 57119000 | 1000_Grains | Cereal (Quaker Cap'n Crunch's Crunchberries)                                     | 24 | 1   | E | 4 |
| 57117500 | 1000_Grains | Cereal (Quaker Christmas Crunch)                                                 | 23 | 1   | E | 4 |
| 56203540 | 1000_Grains | Oatmeal, made with milk and sugar, Puerto Rican style                            | 23 | 3   | C | 4 |
| 53714220 | 1000_Grains | Cereal or granola bar with nuts, chocolate coated                                | 23 | 1   | D | 4 |
| 57127000 | 1000_Grains | Cereal (Post Cocoa Pebbles)                                                      | 23 | 1.5 | D | 4 |
| 57117000 | 1000_Grains | Cereal (Quaker Cap'n Crunch)                                                     | 23 | 1   | E | 4 |
| 57340000 | 1000_Grains | Cereal, puffed rice                                                              | 23 | 3.5 | A | 4 |
| 55203000 | 1000_Grains | Waffle, fruit                                                                    | 23 | 2   | D | 4 |
| 53711100 | 1000_Grains | Cereal or granola bar (Quaker Granola Bites)                                     | 23 | 1.5 | D | 4 |
| 56201056 | 1000_Grains | Grits, regular or quick, made with milk, fat not added in cooking                | 22 | 3.5 | B | 4 |
| 56200390 | 1000_Grains | Barley, NS as to fat added in cooking                                            | 22 | 4   | A | 3 |
| 56200400 | 1000_Grains | Barley, fat not added in cooking                                                 | 22 | 4   | A | 3 |
| 58117110 | 1000_Grains | Cornmeal fritter, Puerto Rican style                                             | 22 | 2   | D | 4 |
| 55501000 | 1000_Grains | Chinese pancake                                                                  | 22 | 3.5 | B | 4 |
| 53710700 | 1000_Grains | Cereal or granola bar (Kellogg's Special K bar)                                  | 22 | 1.5 | D | 4 |
| 56202910 | 1000_Grains | Oatmeal, from fast food, fruit flavored                                          | 22 | 3.5 | B | 4 |
| 55100020 | 1000_Grains | Pancakes, with fruit, from frozen                                                | 22 | 3   | C | 4 |

Supplementary Table 8. Original (uncorrected) scores for all food items.

|          |             |                                                                                      |    |     |   |   |
|----------|-------------|--------------------------------------------------------------------------------------|----|-----|---|---|
| 51183990 | 1000_Grains | Breadsticks, NFS                                                                     | 22 | 3   | C | 4 |
| 51184200 | 1000_Grains | Breadsticks, soft, NFS                                                               | 22 | 3   | C | 4 |
| 51184210 | 1000_Grains | Breadsticks, soft, from fast food / restaurant                                       | 22 | 3   | C | 4 |
| 56201055 | 1000_Grains | Grits, regular or quick, made with milk, NS as to fat added in cooking               | 22 | 3   | C | 4 |
| 56201057 | 1000_Grains | Grits, regular or quick, made with milk, fat added in cooking                        | 22 | 3   | C | 4 |
| 51303100 | 1000_Grains | Muffin, English, whole grain white                                                   | 22 | 4   | A | 4 |
| 51302500 | 1000_Grains | Muffin, English, wheat bran                                                          | 21 | 4   | A | 4 |
| 51303010 | 1000_Grains | Muffin, English, wheat or cracked wheat                                              | 21 | 4   | A | 4 |
| 51303030 | 1000_Grains | Muffin, English, whole wheat                                                         | 21 | 4   | A | 4 |
| 51630200 | 1000_Grains | Muffin, English, multigrain                                                          | 21 | 4   | A | 4 |
| 52215100 | 1000_Grains | Tortilla, corn                                                                       | 21 | 4.5 | A | 4 |
| 55100010 | 1000_Grains | Pancakes, plain, from frozen                                                         | 21 | 3   | C | 4 |
| 52306500 | 1000_Grains | Muffin, pumpkin                                                                      | 21 | 2   | D | 4 |
| 52404060 | 1000_Grains | Bread, pumpkin                                                                       | 21 | 2   | D | 4 |
| 51184230 | 1000_Grains | Breadsticks, soft, with parmesan cheese, from fast food / restaurant                 | 21 | 2   | D | 4 |
| 52306700 | 1000_Grains | Muffin, carrot                                                                       | 21 | 2   | D | 4 |
| 55100055 | 1000_Grains | Pancakes, with fruit, from fast food / restaurant                                    | 21 | 3   | C | 4 |
| 57305175 | 1000_Grains | Cereal (Malt-O-Meal Cocoa Dyno-Bites)                                                | 21 | 1.5 | E | 4 |
| 53430000 | 1000_Grains | Crepe, NS as to filling                                                              | 21 | 3   | C | 4 |
| 56205300 | 1000_Grains | Rice, white and wild, cooked, fat not added in cooking                               | 20 | 3   | C | 4 |
| 51805010 | 1000_Grains | Bread, sunflower meal                                                                | 20 | 3.5 | B | 4 |
| 51108010 | 1000_Grains | Focaccia, Italian flatbread, plain                                                   | 20 | 3   | B | 4 |
| 51421000 | 1000_Grains | Roll, pumpernickel                                                                   | 20 | 4   | A | 4 |
| 55203700 | 1000_Grains | Waffle, cinnamon                                                                     | 20 | 2   | D | 4 |
| 52208760 | 1000_Grains | Gordita/sope shell, plain, no filling                                                | 20 | 3   | C | 4 |
| 55301040 | 1000_Grains | French toast sticks, plain, from fast food / restaurant                              | 19 | 2   | D | 4 |
| 56113990 | 1000_Grains | Noodles, vegetable, cooked                                                           | 19 | 4   | A | 4 |
| 51805020 | 1000_Grains | Bread, sunflower meal, toasted                                                       | 19 | 3   | C | 4 |
| 55100050 | 1000_Grains | Pancakes, plain, from fast food / restaurant                                         | 19 | 2   | D | 4 |
| 52302010 | 1000_Grains | Muffin, fruit                                                                        | 19 | 2   | D | 4 |
| 52301000 | 1000_Grains | Muffin, NFS                                                                          | 19 | 2   | D | 4 |
| 51301805 | 1000_Grains | Bagel, whole wheat, with raisins                                                     | 19 | 3.5 | A | 4 |
| 55204000 | 1000_Grains | Waffle, cornmeal                                                                     | 19 | 3   | C | 4 |
| 57134000 | 1000_Grains | Cereal, corn flakes                                                                  | 19 | 3.5 | C | 4 |
| 57135000 | 1000_Grains | Cereal (Kellogg's Corn Flakes)                                                       | 19 | 3.5 | C | 4 |
| 51630100 | 1000_Grains | Bagel, multigrain, with raisins                                                      | 19 | 3.5 | A | 4 |
| 51301800 | 1000_Grains | Bagel, wheat, with raisins                                                           | 19 | 3.5 | A | 4 |
| 53711006 | 1000_Grains | Cereal or granola bar (Quaker Chewy Dippys Granola Bar)                              | 19 | 1   | E | 4 |
| 53714200 | 1000_Grains | Cereal or granola bar, chocolate coated, NFS                                         | 19 | 1   | E | 4 |
| 55201000 | 1000_Grains | Waffle, plain                                                                        | 19 | 2   | D | 4 |
| 52306550 | 1000_Grains | Muffin, zucchini                                                                     | 19 | 2   | D | 4 |
| 52407000 | 1000_Grains | Bread, zucchini                                                                      | 19 | 2   | D | 4 |
| 55301050 | 1000_Grains | French toast sticks, plain                                                           | 18 | 2   | D | 4 |
| 52302600 | 1000_Grains | Muffin, chocolate                                                                    | 18 | 1.5 | D | 4 |
| 51111010 | 1000_Grains | Bread, cheese                                                                        | 18 | 1.5 | D | 4 |
| 55103020 | 1000_Grains | Pancakes, pumpkin                                                                    | 18 | 3   | C | 4 |
| 55103000 | 1000_Grains | Pancakes, with fruit                                                                 | 18 | 3   | C | 4 |
| 51301040 | 1000_Grains | Bread, wheat or cracked wheat, made from home recipe or purchased at bakery          | 18 | 3.5 | B | 4 |
| 57326000 | 1000_Grains | Cereal (Barbara's Puffins)                                                           | 18 | 3.5 | C | 4 |
| 56205410 | 1000_Grains | Rice, white, cooked with fat, Puerto Rican style                                     | 18 | 3   | C | 4 |
| 57344000 | 1000_Grains | Cereal (Kellogg's Special K)                                                         | 18 | 2   | D | 4 |
| 53430200 | 1000_Grains | Crepe, fruit filled                                                                  | 18 | 3   | C | 4 |
| 56207060 | 1000_Grains | Cream of wheat, instant, made with water, fat added in cooking                       | 18 | 3.5 | B | 4 |
| 56207070 | 1000_Grains | Cream of wheat, instant, made with water, NS as to fat added in cooking              | 18 | 3.5 | B | 4 |
| 51804010 | 1000_Grains | Bread, soy                                                                           | 18 | 3.5 | C | 4 |
| 55200110 | 1000_Grains | Waffle, chocolate, from fast food / restaurant                                       | 18 | 1   | E | 4 |
| 56207030 | 1000_Grains | Cream of wheat, instant, made with water, fat not added in cooking                   | 18 | 3.5 | B | 4 |
| 51111040 | 1000_Grains | Bread, cheese, toasted                                                               | 18 | 1.5 | D | 4 |
| 55100025 | 1000_Grains | Pancakes, with chocolate, from frozen                                                | 17 | 3.5 | C | 4 |
| 51300100 | 1000_Grains | Bagel, whole grain white                                                             | 17 | 4   | A | 4 |
| 56205094 | 1000_Grains | Rice, cream of, cooked, made with milk                                               | 17 | 3.5 | B | 4 |
| 51301050 | 1000_Grains | Bread, wheat or cracked wheat, made from home recipe or purchased at bakery, toasted | 17 | 3.5 | C | 4 |
| 51301700 | 1000_Grains | Bagel, wheat                                                                         | 17 | 4   | A | 4 |
| 51301750 | 1000_Grains | Bagel, whole wheat                                                                   | 17 | 4   | A | 4 |
| 51301900 | 1000_Grains | Bagel, wheat bran                                                                    | 17 | 4   | A | 4 |
| 51404500 | 1000_Grains | Bagel, pumpernickel                                                                  | 17 | 4   | A | 4 |
| 51501080 | 1000_Grains | Bagel, oat bran                                                                      | 17 | 4   | A | 4 |
| 51630000 | 1000_Grains | Bagel, multigrain                                                                    | 17 | 4   | A | 4 |
| 53714210 | 1000_Grains | Cereal or granola bar, with coconut, chocolate coated                                | 17 | 0.5 | E | 4 |
| 51122000 | 1000_Grains | Bread, reduced calorie and/or high fiber, white or NFS                               | 17 | 4.5 | A | 4 |
| 56112000 | 1000_Grains | Noodles, cooked                                                                      | 17 | 3.5 | B | 4 |
| 51804020 | 1000_Grains | Bread, soy, toasted                                                                  | 17 | 4   | C | 4 |
| 71930200 | 1000_Grains | Casabe, cassava bread                                                                | 17 | 3   | C | 4 |
| 56205170 | 1000_Grains | Yellow rice, cooked, fat added in cooking                                            | 17 | 3   | C | 4 |
| 51184220 | 1000_Grains | Breadsticks, soft, from frozen                                                       | 17 | 3.5 | B | 4 |
| 51184240 | 1000_Grains | Breadsticks, soft, with parmesan cheese, from frozen                                 | 17 | 3.5 | B | 4 |
| 58117210 | 1000_Grains | Cornmeal stick, Puerto Rican style                                                   | 16 | 3.5 | C | 4 |
| 56209000 | 1000_Grains | Cream of rye                                                                         | 16 | 3.5 | B | 3 |
| 55301030 | 1000_Grains | French toast sticks, NFS                                                             | 16 | 3   | C | 4 |
| 55301031 | 1000_Grains | French toast sticks, plain, from frozen                                              | 16 | 3   | C | 4 |
| 51122010 | 1000_Grains | Bread, reduced calorie and/or high fiber, white or NFS, toasted                      | 16 | 4.5 | A | 4 |
| 51121035 | 1000_Grains | Garlic bread, from frozen                                                            | 16 | 2   | D | 4 |
| 56205002 | 1000_Grains | Rice, white, cooked, fat added in cooking, made with oil                             | 16 | 3.5 | B | 4 |
| 57239100 | 1000_Grains | Cereal (Kellogg's Honey Crunch Corn Flakes)                                          | 15 | 1.5 | D | 4 |
| 75217490 | 1000_Grains | Hominy, cooked, NS as to fat added in cooking                                        | 15 | 4   | C | 4 |
| 75217520 | 1000_Grains | Hominy, cooked, fat added in cooking                                                 | 15 | 4   | C | 4 |

Supplementary Table 8. Original (uncorrected) scores for all food items.

|          |             |                                                                                              |    |     |   |   |
|----------|-------------|----------------------------------------------------------------------------------------------|----|-----|---|---|
| 51121055 | 1000_Grains | Garlic bread, with parmesan cheese, from frozen                                              | 15 | 2   | D | 4 |
| 51121075 | 1000_Grains | Garlic bread, with melted cheese, from frozen                                                | 15 | 2   | D | 4 |
| 52306010 | 1000_Grains | Muffin, plain                                                                                | 15 | 1.5 | D | 4 |
| 57348000 | 1000_Grains | Cereal, frosted corn flakes                                                                  | 15 | 2   | D | 4 |
| 57349000 | 1000_Grains | Cereal (Kellogg's Frosted Flakes)                                                            | 15 | 2   | D | 4 |
| 51121015 | 1000_Grains | Garlic bread, NFS                                                                            | 15 | 2   | D | 4 |
| 51121025 | 1000_Grains | Garlic bread, from fast food / restaurant                                                    | 15 | 2   | D | 4 |
| 51121065 | 1000_Grains | Garlic bread, with melted cheese, from fast food / restaurant                                | 15 | 2   | D | 4 |
| 52213010 | 1000_Grains | Spoonbread                                                                                   | 15 | 3   | C | 4 |
| 51121045 | 1000_Grains | Garlic bread, with parmesan cheese, from fast food / restaurant                              | 15 | 2   | D | 4 |
| 56201090 | 1000_Grains | Grits, with cheese, NS as to fat added in cooking                                            | 14 | 3.5 | B | 4 |
| 56201092 | 1000_Grains | Grits, with cheese, fat added in cooking                                                     | 14 | 3.5 | B | 4 |
| 55100005 | 1000_Grains | Pancakes, NFS                                                                                | 14 | 2   | D | 4 |
| 56201091 | 1000_Grains | Grits, with cheese, fat not added in cooking                                                 | 14 | 3.5 | B | 4 |
| 57223000 | 1000_Grains | Cereal (Post Fruity Pebbles)                                                                 | 14 | 1   | E | 4 |
| 51109010 | 1000_Grains | Bread, Italian, Grecian, Armenian                                                            | 14 | 3.5 | B | 4 |
| 57305300 | 1000_Grains | Cereal (Malt-O-Meal Fruity Dyno-Bites)                                                       | 14 | 1.5 | E | 4 |
| 56205320 | 1000_Grains | Rice, white and wild, cooked, fat added in cooking                                           | 14 | 3   | C | 4 |
| 56205330 | 1000_Grains | Rice, white and wild, cooked, NS as to fat added in cooking                                  | 14 | 3   | C | 4 |
| 51122100 | 1000_Grains | Bread, reduced calorie and/or high fiber, white or NFS, with fruit and/or nuts               | 14 | 4   | A | 4 |
| 55211050 | 1000_Grains | Waffle, plain, reduced fat                                                                   | 14 | 2   | D | 4 |
| 55101000 | 1000_Grains | Pancakes, plain                                                                              | 13 | 2   | D | 4 |
| 55400010 | 1000_Grains | Crepe, NFS                                                                                   | 13 | 3   | C | 4 |
| 57305180 | 1000_Grains | Cereal (Malt-O-Meal Corn Bursts)                                                             | 13 | 1   | E | 4 |
| 51109040 | 1000_Grains | Bread, Italian, Grecian, Armenian, toasted                                                   | 13 | 3.5 | B | 4 |
| 52302500 | 1000_Grains | Muffin, chocolate chip                                                                       | 13 | 1.5 | D | 4 |
| 53714510 | 1000_Grains | Breakfast bar, date, with yogurt coating                                                     | 13 | 2   | D | 4 |
| 53400300 | 1000_Grains | Blintz, fruit-filled                                                                         | 13 | 3   | C | 4 |
| 57148000 | 1000_Grains | Cereal (Kellogg's Crispix)                                                                   | 13 | 2   | D | 4 |
| 56201220 | 1000_Grains | Grits, instant, made with water, fat added in cooking                                        | 13 | 3   | C | 4 |
| 56201230 | 1000_Grains | Grits, instant, made with water, NS as to fat added in cooking                               | 13 | 3   | C | 4 |
| 52304040 | 1000_Grains | Muffin, bran with fruit, lowfat                                                              | 13 | 3   | C | 4 |
| 51122110 | 1000_Grains | Bread, reduced calorie and/or high fiber, white or NFS, with fruit and/or nuts, toasted      | 13 | 4   | B | 4 |
| 52209010 | 1000_Grains | Hush puppy                                                                                   | 13 | 3.5 | C | 4 |
| 53430100 | 1000_Grains | Crepe, chocolate filled                                                                      | 13 | 3   | C | 4 |
| 57305210 | 1000_Grains | Cereal (Malt-O-Meal Frosted Flakes)                                                          | 12 | 1.5 | D | 4 |
| 55401000 | 1000_Grains | Crepe, plain                                                                                 | 12 | 3   | C | 4 |
| 56104000 | 1000_Grains | Pasta, vegetable, cooked                                                                     | 12 | 4   | A | 4 |
| 53714400 | 1000_Grains | Cereal or granola bar, with rice cereal                                                      | 12 | 2   | D | 4 |
| 55300010 | 1000_Grains | French toast, NFS                                                                            | 12 | 3   | C | 4 |
| 55203600 | 1000_Grains | Waffle, chocolate                                                                            | 12 | 1.5 | E | 4 |
| 51000400 | 1000_Grains | Roll, bran, NS as to type of bran                                                            | 12 | 3.5 | B | 4 |
| 51620000 | 1000_Grains | Roll, multigrain                                                                             | 12 | 3.5 | B | 4 |
| 51620020 | 1000_Grains | Roll, multigrain, hot dog bun                                                                | 12 | 3.5 | B | 4 |
| 51620030 | 1000_Grains | Roll, multigrain, hamburger bun                                                              | 12 | 3.5 | B | 4 |
| 55100060 | 1000_Grains | Pancakes, with chocolate, from fast food / restaurant                                        | 12 | 1.5 | D | 4 |
| 57148500 | 1000_Grains | Cereal, crispy brown rice                                                                    | 11 | 3.5 | D | 4 |
| 57151000 | 1000_Grains | Cereal, crispy rice                                                                          | 11 | 3.5 | D | 4 |
| 57337000 | 1000_Grains | Cereal, rice flakes                                                                          | 11 | 3.5 | D | 4 |
| 57316710 | 1000_Grains | Cereal (Quaker Honey Graham Oh's)                                                            | 11 | 0.5 | E | 4 |
| 51301120 | 1000_Grains | Bread, wheat or cracked wheat, with raisins                                                  | 11 | 3.5 | C | 4 |
| 51129010 | 1000_Grains | Bread, raisin                                                                                | 11 | 3.5 | B | 4 |
| 57305200 | 1000_Grains | Cereal (Malt-O-Meal Crispy Rice)                                                             | 11 | 3.5 | D | 4 |
| 57339000 | 1000_Grains | Cereal (Kellogg's Rice Krispies)                                                             | 11 | 3.5 | D | 4 |
| 53710600 | 1000_Grains | Milk 'n Cereal bar                                                                           | 11 | 0.5 | E | 4 |
| 55301000 | 1000_Grains | French toast, plain                                                                          | 11 | 3   | C | 4 |
| 52101000 | 1000_Grains | Biscuit, baking powder or buttermilk type, NS as to made from mix, refrigerated dough, or ho | 11 | 2   | D | 4 |
| 56207050 | 1000_Grains | Wheat, cream of, cooked, made with milk and sugar, Puerto Rican style                        | 11 | 3   | C | 4 |
| 56207160 | 1000_Grains | Couscous, plain, cooked                                                                      | 11 | 3.5 | B | 3 |
| 57216000 | 1000_Grains | Cereal, frosted rice                                                                         | 11 | 1.5 | D | 4 |
| 57218000 | 1000_Grains | Cereal (Kellogg's Frosted Krispies)                                                          | 11 | 1.5 | D | 4 |
| 52206060 | 1000_Grains | Cornbread muffin, stick, round, made from home recipe                                        | 10 | 3   | C | 4 |
| 52202060 | 1000_Grains | Cornbread, made from home recipe                                                             | 10 | 3   | C | 4 |
| 52101040 | 1000_Grains | Crumpet                                                                                      | 10 | 3   | B | 4 |
| 52101050 | 1000_Grains | Crumpet, toasted                                                                             | 10 | 3   | B | 4 |
| 56201210 | 1000_Grains | Grits, instant, made with water, fat not added in cooking                                    | 10 | 3.5 | B | 4 |
| 51301130 | 1000_Grains | Bread, wheat or cracked wheat, with raisins, toasted                                         | 10 | 3.5 | C | 4 |
| 51113010 | 1000_Grains | Bread, cinnamon                                                                              | 10 | 3   | B | 4 |
| 51156500 | 1000_Grains | Roll, garlic                                                                                 | 10 | 3.5 | C | 4 |
| 51129020 | 1000_Grains | Bread, raisin, toasted                                                                       | 10 | 3.5 | B | 4 |
| 51401010 | 1000_Grains | Bread, rye                                                                                   | 10 | 4   | A | 4 |
| 51401030 | 1000_Grains | Bread, marble rye and pumpnickel                                                             | 10 | 4   | A | 4 |
| 51401200 | 1000_Grains | Muffin, English, rye                                                                         | 10 | 4   | A | 4 |
| 51420000 | 1000_Grains | Roll, rye                                                                                    | 10 | 4   | A | 4 |
| 51000300 | 1000_Grains | Roll, hard, NS as to major flour                                                             | 10 | 3.5 | B | 4 |
| 51153000 | 1000_Grains | Roll, white, hard                                                                            | 10 | 3.5 | B | 4 |
| 56205006 | 1000_Grains | Rice, white, cooked, fat added in cooking, made with margarine                               | 10 | 3.5 | B | 4 |
| 56130000 | 1000_Grains | Pasta, cooked                                                                                | 9  | 3.5 | A | 4 |
| 51401020 | 1000_Grains | Bread, rye, toasted                                                                          | 9  | 4   | B | 4 |
| 51401040 | 1000_Grains | Bread, marble rye and pumpnickel, toasted                                                    | 9  | 4   | B | 4 |
| 55200030 | 1000_Grains | Waffle, plain, reduced fat, from frozen                                                      | 9  | 3   | B | 4 |
| 55100015 | 1000_Grains | Pancakes, plain, reduced fat, from fozen                                                     | 9  | 3.5 | C | 4 |
| 55101015 | 1000_Grains | Pancakes, plain, reduced fat                                                                 | 9  | 3.5 | C | 4 |
| 51154600 | 1000_Grains | Roll, cheese                                                                                 | 9  | 3   | C | 4 |
| 53400200 | 1000_Grains | Blintz, cheese-filled                                                                        | 9  | 3   | D | 4 |
| 56200410 | 1000_Grains | Barley, fat added in cooking                                                                 | 8  | 3.5 | A | 4 |

Supplementary Table 8. Original (uncorrected) scores for all food items.

|          |             |                                                                                      |   |     |   |   |
|----------|-------------|--------------------------------------------------------------------------------------|---|-----|---|---|
| 55301010 | 1000_Grains | French toast, plain, reduced fat                                                     | 8 | 3.5 | B | 4 |
| 51000110 | 1000_Grains | Bread, NS as to major flour, toasted                                                 | 8 | 3.5 | B | 4 |
| 51101010 | 1000_Grains | Bread, white, toasted                                                                | 8 | 3.5 | B | 4 |
| 51113100 | 1000_Grains | Bread, cinnamon, toasted                                                             | 8 | 3.5 | B | 4 |
| 51000100 | 1000_Grains | Bread, NS as to major flour                                                          | 8 | 3.5 | B | 4 |
| 51101000 | 1000_Grains | Bread, white                                                                         | 8 | 3.5 | B | 4 |
| 51158100 | 1000_Grains | Roll, Mexican, bolillo                                                               | 8 | 3.5 | B | 4 |
| 51127010 | 1000_Grains | Bread, potato                                                                        | 8 | 4   | A | 4 |
| 51133010 | 1000_Grains | Bread, sour dough                                                                    | 8 | 3.5 | B | 4 |
| 51159000 | 1000_Grains | Roll, sour dough                                                                     | 8 | 3.5 | B | 4 |
| 51130510 | 1000_Grains | Bread, white, low sodium or no salt                                                  | 8 | 3.5 | A | 4 |
| 56207005 | 1000_Grains | Cream of wheat, NS as to regular, quick, or instant, fat added in cooking            | 8 | 3.5 | B | 4 |
| 56207015 | 1000_Grains | Cream of wheat, regular or quick, made with water, NS as to fat added in cooking     | 8 | 3.5 | B | 4 |
| 56207017 | 1000_Grains | Cream of wheat, regular or quick, made with water, fat added in cooking              | 8 | 3.5 | B | 4 |
| 56206990 | 1000_Grains | Cream of wheat, NS as to regular, quick, or instant, NS as to fat added in cooking   | 8 | 3.5 | B | 4 |
| 55103100 | 1000_Grains | Pancakes, with chocolate                                                             | 8 | 1.5 | D | 4 |
| 56207016 | 1000_Grains | Cream of wheat, regular or quick, made with water, fat not added in cooking          | 8 | 3.5 | B | 4 |
| 56207000 | 1000_Grains | Cream of wheat, NS as to regular, quick, or instant, fat not added in cooking        | 8 | 3.5 | B | 4 |
| 51300300 | 1000_Grains | Bread, sprouted wheat                                                                | 7 | 4   | A | 4 |
| 51127020 | 1000_Grains | Bread, potato, toasted                                                               | 7 | 4   | A | 4 |
| 55300050 | 1000_Grains | French toast, plain, from fast food / restaurant                                     | 7 | 2   | D | 4 |
| 51300310 | 1000_Grains | Bread, sprouted wheat, toasted                                                       | 7 | 4.5 | A | 4 |
| 51133020 | 1000_Grains | Bread, sour dough, toasted                                                           | 7 | 3.5 | B | 4 |
| 51155000 | 1000_Grains | Roll, French or Vienna                                                               | 7 | 3.5 | B | 4 |
| 52104100 | 1000_Grains | Biscuit, cheese                                                                      | 7 | 1.5 | D | 4 |
| 51130520 | 1000_Grains | Bread, white, low sodium or no salt, toasted                                         | 7 | 3.5 | A | 4 |
| 52105200 | 1000_Grains | Scone, with fruit                                                                    | 7 | 2   | D | 4 |
| 56201051 | 1000_Grains | Grits, regular or quick, made with water, fat not added in cooking                   | 6 | 3.5 | B | 4 |
| 56201000 | 1000_Grains | Grits, NS as to regular, quick, or instant, fat not added in cooking                 | 6 | 3.5 | B | 4 |
| 56205007 | 1000_Grains | Rice, white, cooked, fat added in cooking, NS as to type of fat                      | 6 | 3.5 | B | 4 |
| 51119010 | 1000_Grains | Bread, egg, Challah                                                                  | 6 | 3.5 | B | 4 |
| 51154550 | 1000_Grains | Roll, egg bread                                                                      | 6 | 3.5 | B | 4 |
| 55300020 | 1000_Grains | French toast, plain, from frozen                                                     | 6 | 3.5 | B | 4 |
| 51000200 | 1000_Grains | Roll, NS as to major flour                                                           | 6 | 3.5 | B | 4 |
| 51150000 | 1000_Grains | Roll, white, soft                                                                    | 6 | 3.5 | B | 4 |
| 51154010 | 1000_Grains | Roll, white, hot dog bun                                                             | 6 | 3.5 | B | 4 |
| 51154100 | 1000_Grains | Roll, white, hamburger bun                                                           | 6 | 3.5 | B | 4 |
| 51157000 | 1000_Grains | Roll, white, hoagie, submarine                                                       | 6 | 3.5 | B | 4 |
| 56201050 | 1000_Grains | Grits, regular or quick, made with water, NS as to fat added in cooking              | 5 | 3.5 | B | 4 |
| 56201052 | 1000_Grains | Grits, regular or quick, made with water, fat added in cooking                       | 5 | 3.5 | B | 4 |
| 56200990 | 1000_Grains | Grits, NS as to regular, quick, or instant, NS as to fat added in cooking            | 5 | 3.5 | B | 4 |
| 56201040 | 1000_Grains | Grits, NS as to regular, quick, or instant, fat added in cooking                     | 5 | 3.5 | B | 4 |
| 57339500 | 1000_Grains | Cereal (Kellogg's Rice Krispies Treats Cereal)                                       | 5 | 1.5 | D | 4 |
| 52215350 | 1000_Grains | Taco shell, flour                                                                    | 5 | 1.5 | D | 4 |
| 51119040 | 1000_Grains | Bread, egg, Challah, toasted                                                         | 5 | 3.5 | B | 4 |
| 56205060 | 1000_Grains | Rice, cooked, with milk                                                              | 5 | 3   | C | 4 |
| 51186160 | 1000_Grains | Muffin, English, with fruit other than raisins                                       | 4 | 4   | A | 4 |
| 51186100 | 1000_Grains | Muffin, English, with raisins                                                        | 4 | 3.5 | A | 4 |
| 56201550 | 1000_Grains | Cornmeal dumpling                                                                    | 4 | 3.5 | B | 4 |
| 52220110 | 1000_Grains | Arepa Dominicana                                                                     | 4 | 2   | D | 4 |
| 56205130 | 1000_Grains | Yellow rice, cooked, NS as to fat added in cooking                                   | 4 | 3   | C | 4 |
| 56205150 | 1000_Grains | Yellow rice, cooked, fat not added in cooking                                        | 4 | 3   | C | 4 |
| 52104010 | 1000_Grains | Biscuit, baking powder or buttermilk type, made from home recipe                     | 4 | 2   | D | 4 |
| 55310100 | 1000_Grains | Fried bread, Puerto Rican style                                                      | 4 | 2   | D | 4 |
| 56201516 | 1000_Grains | Cornmeal mush, fat not added in cooking                                              | 4 | 3.5 | B | 4 |
| 56201515 | 1000_Grains | Cornmeal mush, NS as to fat added in cooking                                         | 3 | 3.5 | B | 4 |
| 56201517 | 1000_Grains | Cornmeal mush, fat added in cooking                                                  | 3 | 3.5 | B | 4 |
| 52105100 | 1000_Grains | Scone                                                                                | 3 | 2   | D | 4 |
| 52215000 | 1000_Grains | Tortilla, NFS                                                                        | 3 | 3.5 | A | 4 |
| 52304010 | 1000_Grains | Muffin, wheat bran                                                                   | 3 | 3   | C | 4 |
| 52215300 | 1000_Grains | Taco shell, corn                                                                     | 3 | 3.5 | C | 4 |
| 51140100 | 1000_Grains | Bread, dough, fried                                                                  | 3 | 3   | B | 4 |
| 52206010 | 1000_Grains | Cornbread muffin, stick, round                                                       | 3 | 3.5 | C | 4 |
| 51154510 | 1000_Grains | Roll, diet                                                                           | 2 | 3.5 | B | 4 |
| 51186010 | 1000_Grains | Muffin, English                                                                      | 2 | 4   | A | 4 |
| 52311010 | 1000_Grains | Popover                                                                              | 2 | 3   | C | 4 |
| 51106010 | 1000_Grains | Bread, native, water, Puerto Rican style                                             | 2 | 3   | B | 4 |
| 51105010 | 1000_Grains | Bread, Cuban                                                                         | 1 | 3.5 | B | 4 |
| 51107010 | 1000_Grains | Bread, French or Vienna                                                              | 1 | 3.5 | B | 4 |
| 51000180 | 1000_Grains | Bread, made from home recipe or purchased at a bakery, NS as to major flour          | 1 | 3   | C | 4 |
| 51000190 | 1000_Grains | Bread, made from home recipe or purchased at a bakery, toasted, NS as to major flour | 1 | 3   | C | 4 |
| 51101050 | 1000_Grains | Bread, white, made from home recipe or purchased at a bakery                         | 1 | 3   | C | 4 |
| 51101060 | 1000_Grains | Bread, white, made from home recipe or purchased at a bakery, toasted                | 1 | 3   | C | 4 |
| 51105040 | 1000_Grains | Bread, Cuban, toasted                                                                | 1 | 3.5 | C | 4 |
| 51106020 | 1000_Grains | Bread, native, water, toasted, Puerto Rican style                                    | 1 | 3.5 | B | 4 |
| 51106200 | 1000_Grains | Bread, lard, Puerto Rican style                                                      | 1 | 3.5 | B | 4 |
| 51106210 | 1000_Grains | Bread, lard, toasted, Puerto Rican style                                             | 1 | 3   | C | 4 |
| 51106300 | 1000_Grains | Bread, caressed, Puerto Rican style                                                  | 1 | 3   | C | 4 |
| 51106310 | 1000_Grains | Bread, caressed, toasted, Puerto Rican style                                         | 1 | 3   | C | 4 |
| 51107040 | 1000_Grains | Bread, French or Vienna, toasted                                                     | 1 | 3.5 | B | 4 |
| 51109100 | 1000_Grains | Bread, pita                                                                          | 1 | 3.5 | B | 4 |
| 51109110 | 1000_Grains | Bread, pita, toasted                                                                 | 1 | 3.5 | B | 4 |
| 51109150 | 1000_Grains | Bread, pita with fruit                                                               | 1 | 3   | B | 4 |
| 51109200 | 1000_Grains | Bread, pita with fruit, toasted                                                      | 1 | 3   | B | 4 |
| 51115010 | 1000_Grains | Bread, cornmeal and molasses                                                         | 1 | 3   | C | 4 |
| 51115020 | 1000_Grains | Bread, cornmeal and molasses, toasted                                                | 1 | 3   | C | 4 |



Supplementary Table 8. Original (uncorrected) scores for all food items.

|          |             |                                                                                 |   |     |   |   |
|----------|-------------|---------------------------------------------------------------------------------|---|-----|---|---|
| 51121110 | 1000_Grains | Bread, onion                                                                    | 1 | 3   | B | 4 |
| 51121120 | 1000_Grains | Bread, onion, toasted                                                           | 1 | 3   | B | 4 |
| 51134000 | 1000_Grains | Bread, sweet potato                                                             | 1 | 3   | B | 4 |
| 51134010 | 1000_Grains | Bread, sweet potato, toasted                                                    | 1 | 3   | B | 4 |
| 51135000 | 1000_Grains | Bread, vegetable                                                                | 1 | 3.5 | B | 4 |
| 51135010 | 1000_Grains | Bread, vegetable, toasted                                                       | 1 | 3   | C | 4 |
| 51180010 | 1000_Grains | Bagel                                                                           | 1 | 3.5 | B | 4 |
| 51180030 | 1000_Grains | Bagel, with raisins                                                             | 1 | 3   | C | 4 |
| 51180080 | 1000_Grains | Bagel, with fruit other than raisins                                            | 1 | 3.5 | B | 4 |
| 51186130 | 1000_Grains | Muffin, English, cheese                                                         | 1 | 3.5 | A | 4 |
| 52101030 | 1000_Grains | Biscuit dough, fried                                                            | 1 | 1.5 | D | 4 |
| 52101100 | 1000_Grains | Biscuit, baking powder or buttermilk type, made from mix                        | 1 | 1.5 | D | 4 |
| 52101150 | 1000_Grains | Biscuit, baking powder or buttermilk type, made from refrigerated dough, lowfat | 1 | 2   | D | 4 |
| 52102040 | 1000_Grains | Biscuit, baking powder or buttermilk type, made from refrigerated dough         | 1 | 1.5 | D | 4 |
| 52103000 | 1000_Grains | Biscuit, baking powder or buttermilk type, commercially baked                   | 1 | 1   | E | 4 |
| 52104200 | 1000_Grains | Biscuit, cinnamon-raisin                                                        | 1 | 1.5 | D | 4 |
| 52201000 | 1000_Grains | Cornbread, prepared from mix                                                    | 1 | 2   | D | 4 |
| 52207010 | 1000_Grains | Corn flour patty or tart, fried                                                 | 1 | 3   | B | 4 |
| 52208010 | 1000_Grains | Corn pone, baked                                                                | 1 | 3   | B | 4 |
| 52208020 | 1000_Grains | Corn pone, fried                                                                | 1 | 3   | C | 4 |
| 52211010 | 1000_Grains | Johnnycake                                                                      | 1 | 2   | D | 4 |
| 52215200 | 1000_Grains | Tortilla, flour                                                                 | 1 | 3.5 | C | 4 |
| 52302020 | 1000_Grains | Muffin, fruit, low fat                                                          | 1 | 3.5 | C | 4 |
| 52408000 | 1000_Grains | Bread, Irish soda                                                               | 1 | 2   | D | 4 |
| 55105100 | 1000_Grains | Pancakes, cornmeal                                                              | 1 | 3.5 | C | 4 |
| 55610300 | 1000_Grains | Dumpling, plain                                                                 | 1 | 3   | C | 4 |
| 56117090 | 1000_Grains | Rice noodles, cooked                                                            | 1 | 3.5 | B | 4 |
| 56201540 | 1000_Grains | Cornmeal, Puerto Rican Style                                                    | 1 | 3   | C | 4 |
| 56201600 | 1000_Grains | Masa harina, cooked                                                             | 1 | 3.5 | B | 4 |
| 56205000 | 1000_Grains | Rice, cooked, NFS                                                               | 1 | 3.5 | B | 4 |
| 56205001 | 1000_Grains | Rice, white, cooked, NS as to fat added in cooking                              | 1 | 3.5 | B | 4 |
| 56205004 | 1000_Grains | Rice, white, cooked, fat added in cooking, made with butter                     | 1 | 3   | C | 4 |
| 56205008 | 1000_Grains | Rice, white, cooked, fat not added in cooking                                   | 1 | 3.5 | B | 4 |
| 56205050 | 1000_Grains | Rice, cream of, cooked, fat not added in cooking                                | 1 | 3.5 | B | 4 |
| 56205070 | 1000_Grains | Rice, sweet, cooked with honey                                                  | 1 | 3   | C | 4 |
| 56205080 | 1000_Grains | Rice, creamed, made with milk and sugar, Puerto Rican style                     | 1 | 3.5 | B | 4 |
| 56205090 | 1000_Grains | Rice, cream of, cooked, fat added in cooking                                    | 1 | 3.5 | B | 4 |
| 56205092 | 1000_Grains | Rice, cream of, cooked, NS as to fat added in cooking                           | 1 | 3.5 | B | 4 |
| 56205101 | 1000_Grains | Congee                                                                          | 1 | 3.5 | B | 4 |
| 56205190 | 1000_Grains | Rice, white, cooked, glutinous                                                  | 1 | 3.5 | B | 3 |

Supplementary Table 8. Original (uncorrected) scores for all food items.

| foodcode | level1nd   | Description                                                                            | Food Compass Score | Health Star Rating | Nutri-Score | NOVA Category |
|----------|------------|----------------------------------------------------------------------------------------|--------------------|--------------------|-------------|---------------|
| 61101010 | 2000_Fruit | Grapefruit, raw                                                                        | 100                | 4.5                | A           | 1             |
| 61104010 | 2000_Fruit | Grapefruit and orange sections, raw                                                    | 100                | 4.5                | A           | 1             |
| 61104220 | 2000_Fruit | Grapefruit and orange sections, cooked, canned, or frozen, unsweetened, water pack     | 100                | 4.5                | A           | 1             |
| 61113010 | 2000_Fruit | Lemon, raw                                                                             | 100                | 4.5                | A           | 1             |
| 61116010 | 2000_Fruit | Lime, raw                                                                              | 100                | 4.5                | A           | 1             |
| 61119010 | 2000_Fruit | Orange, raw                                                                            | 100                | 4.5                | A           | 1             |
| 61122350 | 2000_Fruit | Orange, mandarin, canned or frozen, drained                                            | 100                | 4.5                | A           | 3             |
| 61125000 | 2000_Fruit | Tangelo, raw                                                                           | 100                | 4.5                | A           | 1             |
| 62114000 | 2000_Fruit | Lychee, dried                                                                          | 100                | 3                  | B           | 1             |
| 63103010 | 2000_Fruit | Apricot, raw                                                                           | 100                | 4.5                | A           | 1             |
| 63103120 | 2000_Fruit | Apricot, cooked or canned, unsweetened, water pack                                     | 100                | 4.5                | A           | 1             |
| 63109010 | 2000_Fruit | Cantaloupe, raw                                                                        | 100                | 4.5                | A           | 1             |
| 63109610 | 2000_Fruit | Cantaloupe, frozen                                                                     | 100                | 4.5                | A           | 1             |
| 63109700 | 2000_Fruit | Starfruit, raw                                                                         | 100                | 4.5                | A           | 1             |
| 63110010 | 2000_Fruit | Cassaba melon, raw                                                                     | 100                | 4.5                | A           | 1             |
| 63113010 | 2000_Fruit | Cherries, sour, red, raw                                                               | 100                | 4.5                | A           | 1             |
| 63115200 | 2000_Fruit | Cherries, frozen                                                                       | 100                | 4.5                | A           | 1             |
| 63117010 | 2000_Fruit | Currants, raw                                                                          | 100                | 5                  | A           | 1             |
| 63125010 | 2000_Fruit | Guava, raw                                                                             | 100                | 5                  | A           | 1             |
| 63126500 | 2000_Fruit | Kiwi fruit, raw                                                                        | 100                | 4.5                | A           | 1             |
| 63131010 | 2000_Fruit | Nectarine, raw                                                                         | 100                | 4.5                | A           | 1             |
| 63133010 | 2000_Fruit | Papaya, raw                                                                            | 100                | 4.5                | A           | 1             |
| 63135010 | 2000_Fruit | Peach, raw                                                                             | 100                | 4.5                | A           | 1             |
| 63135120 | 2000_Fruit | Peach, cooked or canned, unsweetened, water pack                                       | 100                | 4.5                | A           | 1             |
| 63135620 | 2000_Fruit | Peach, frozen, unsweetened                                                             | 100                | 4.5                | A           | 1             |
| 63147010 | 2000_Fruit | Rhubarb, raw                                                                           | 100                | 4.5                | A           | 1             |
| 63147120 | 2000_Fruit | Rhubarb, cooked or canned, unsweetened                                                 | 100                | 4.5                | A           | 1             |
| 63149010 | 2000_Fruit | Watermelon, raw                                                                        | 100                | 4.5                | A           | 1             |
| 63200100 | 2000_Fruit | Berries, raw, NFS                                                                      | 100                | 4.5                | A           | 1             |
| 63200200 | 2000_Fruit | Berries, frozen, NFS                                                                   | 100                | 4.5                | A           | 1             |
| 63201010 | 2000_Fruit | Blackberries, raw                                                                      | 100                | 5                  | A           | 1             |
| 63201600 | 2000_Fruit | Blackberries, frozen                                                                   | 100                | 5                  | A           | 1             |
| 63203570 | 2000_Fruit | Blueberries, frozen, NS as to sweetened or unsweetened                                 | 100                | 4.5                | A           | 1             |
| 63203600 | 2000_Fruit | Blueberries, frozen, unsweetened                                                       | 100                | 4.5                | A           | 1             |
| 63205010 | 2000_Fruit | Boysenberries, raw                                                                     | 100                | 5                  | A           | 1             |
| 63205600 | 2000_Fruit | Boysenberries, frozen                                                                  | 100                | 5                  | A           | 1             |
| 63207010 | 2000_Fruit | Cranberries, raw                                                                       | 100                | 5                  | A           | 1             |
| 63208000 | 2000_Fruit | Dewberries, raw                                                                        | 100                | 5                  | A           | 1             |
| 63215010 | 2000_Fruit | Loganberries, raw                                                                      | 100                | 5                  | A           | 1             |
| 63215600 | 2000_Fruit | Loganberries, frozen                                                                   | 100                | 5                  | A           | 1             |
| 63217010 | 2000_Fruit | Mulberries, raw                                                                        | 100                | 4.5                | A           | 1             |
| 63219000 | 2000_Fruit | Raspberries, raw, NS as to color                                                       | 100                | 5                  | A           | 1             |
| 63219010 | 2000_Fruit | Raspberries, black, raw                                                                | 100                | 5                  | A           | 1             |
| 63219020 | 2000_Fruit | Raspberries, red, raw                                                                  | 100                | 5                  | A           | 1             |
| 63219120 | 2000_Fruit | Raspberries, cooked or canned, unsweetened, water pack                                 | 100                | 5                  | A           | 1             |
| 63219610 | 2000_Fruit | Raspberries, frozen, unsweetened                                                       | 100                | 5                  | A           | 1             |
| 63223020 | 2000_Fruit | Strawberries, raw                                                                      | 100                | 4.5                | A           | 1             |
| 63223120 | 2000_Fruit | Strawberries, cooked or canned, unsweetened, water pack                                | 100                | 4.5                | A           | 1             |
| 63223610 | 2000_Fruit | Strawberries, frozen, unsweetened                                                      | 100                | 4.5                | A           | 1             |
| 63224000 | 2000_Fruit | Youngberries, raw                                                                      | 100                | 5                  | A           | 1             |
| 63311050 | 2000_Fruit | Fruit salad, fresh or raw, including citrus fruits, no dressing                        | 100                | 4.5                | A           | 1             |
| 63311000 | 2000_Fruit | Fruit salad, fresh or raw, excluding citrus fruits, no dressing                        | 100                | 4.5                | A           | 1             |
| 63127010 | 2000_Fruit | Honeydew melon, raw                                                                    | 99                 | 4.5                | A           | 1             |
| 63127610 | 2000_Fruit | Honeydew, frozen                                                                       | 99                 | 4.5                | A           | 1             |
| 63126010 | 2000_Fruit | Juneberry, raw                                                                         | 99                 | 4.5                | A           | 1             |
| 63203010 | 2000_Fruit | Blueberries, raw                                                                       | 99                 | 4.5                | A           | 1             |
| 63214000 | 2000_Fruit | Huckleberries, raw                                                                     | 99                 | 4.5                | A           | 1             |
| 63311080 | 2000_Fruit | Fruit cocktail or mix, frozen                                                          | 98                 | 4.5                | A           | 1             |
| 63137050 | 2000_Fruit | Pear, Japanese, raw                                                                    | 98                 | 4.5                | A           | 1             |
| 63143010 | 2000_Fruit | Plum, raw                                                                              | 97                 | 4.5                | A           | 1             |
| 62104100 | 2000_Fruit | Apricot, dried, uncooked                                                               | 96                 | 3.5                | B           | 1             |
| 61100500 | 2000_Fruit | Calamondin, raw                                                                        | 96                 | 4.5                | A           | 1             |
| 61125010 | 2000_Fruit | Tangerine, raw                                                                         | 96                 | 4.5                | A           | 1             |
| 61110010 | 2000_Fruit | Kumquat, raw                                                                           | 96                 | 5                  | A           | 1             |
| 63101000 | 2000_Fruit | Apple, raw                                                                             | 96                 | 4.5                | A           | 1             |
| 62116100 | 2000_Fruit | Peach, dried, uncooked                                                                 | 95                 | 4                  | C           | 1             |
| 61122320 | 2000_Fruit | Orange, mandarin, canned or frozen, juice pack                                         | 95                 | 4.5                | A           | 3             |
| 62116220 | 2000_Fruit | Peach, dried, cooked, unsweetened                                                      | 94                 | 4                  | A           | 1             |
| 63141010 | 2000_Fruit | Pineapple, raw                                                                         | 94                 | 4.5                | A           | 1             |
| 63101320 | 2000_Fruit | Apple, baked, unsweetened                                                              | 94                 | 4.5                | A           | 1             |
| 61122300 | 2000_Fruit | Orange, mandarin, canned or frozen, NS as to sweetened or unsweetened; sweetened, NS a | 94                 | 4.5                | A           | 3             |
| 63129010 | 2000_Fruit | Mango, raw                                                                             | 94                 | 4                  | A           | 1             |
| 63141120 | 2000_Fruit | Pineapple, cooked or canned, unsweetened, waterpack                                    | 93                 | 4.5                | A           | 1             |
| 63134010 | 2000_Fruit | Passion fruit, raw                                                                     | 93                 | 5                  | A           | 1             |
| 63100100 | 2000_Fruit | Fruit, NS as to type                                                                   | 92                 | 4.5                | A           | 1             |
| 63133050 | 2000_Fruit | Papaya, green, cooked                                                                  | 92                 | 4.5                | A           | 1             |
| 63113110 | 2000_Fruit | Cherries, sour, red, cooked, unsweetened                                               | 92                 | 4.5                | A           | 1             |
| 63123020 | 2000_Fruit | Grapes, American type, slip skin, raw                                                  | 92                 | 4                  | A           | 1             |
| 61119020 | 2000_Fruit | Orange, sections, canned, juice pack                                                   | 92                 | 4.5                | A           | 3             |
| 63223030 | 2000_Fruit | Strawberries, raw, with sugar                                                          | 91                 | 4.5                | A           | 1             |
| 62104220 | 2000_Fruit | Apricot, dried, cooked, unsweetened                                                    | 90                 | 4                  | B           | 1             |
| 63115010 | 2000_Fruit | Cherries, sweet, raw                                                                   | 88                 | 4.5                | A           | 1             |
| 63203120 | 2000_Fruit | Blueberries, cooked or canned, unsweetened, water pack                                 | 88                 | 4.5                | A           | 1             |
| 62108100 | 2000_Fruit | Currants, dried                                                                        | 88                 | 3.5                | C           | 1             |
| 62107100 | 2000_Fruit | Banana flakes, dehydrated                                                              | 88                 | 4                  | B           | 1             |

Supplementary Table 8. Original (uncorrected) scores for all food items.

|          |            |                                                                                           |    |     |   |   |
|----------|------------|-------------------------------------------------------------------------------------------|----|-----|---|---|
| 63139010 | 2000_Fruit | Persimmon, raw                                                                            | 88 | 4.5 | A | 1 |
| 63126510 | 2000_Fruit | Lychee, raw                                                                               | 87 | 4   | B | 1 |
| 63123000 | 2000_Fruit | Grapes, raw, NS as to type                                                                | 87 | 4   | B | 1 |
| 63123010 | 2000_Fruit | Grapes, European type, adherent skin, raw                                                 | 87 | 4   | B | 1 |
| 63126700 | 2000_Fruit | Longans, raw                                                                              | 87 | 4   | B | 1 |
| 62113100 | 2000_Fruit | Fig, dried, uncooked                                                                      | 87 | 4   | C | 1 |
| 63137010 | 2000_Fruit | Pear, raw                                                                                 | 86 | 4.5 | A | 1 |
| 62101050 | 2000_Fruit | Fruit mixture, dried                                                                      | 86 | 4   | B | 3 |
| 62101100 | 2000_Fruit | Apple, dried, uncooked                                                                    | 85 | 3.5 | C | 1 |
| 62101220 | 2000_Fruit | Apple, dried, cooked, unsweetened                                                         | 85 | 4.5 | A | 1 |
| 61101200 | 2000_Fruit | Grapefruit, canned or frozen, NS as to sweetened or unsweetened; sweetened, NS as to type | 85 | 4.5 | A | 3 |
| 62122100 | 2000_Fruit | Prune, dried, uncooked                                                                    | 85 | 4   | B | 1 |
| 62101300 | 2000_Fruit | Apple chips                                                                               | 85 | 3   | D | 3 |
| 63103170 | 2000_Fruit | Apricot, cooked or canned, juice pack                                                     | 85 | 4.5 | A | 3 |
| 63129030 | 2000_Fruit | Mango, cooked                                                                             | 84 | 4   | B | 1 |
| 61101220 | 2000_Fruit | Grapefruit, canned or frozen, unsweetened, water pack                                     | 84 | 4.5 | B | 1 |
| 63320100 | 2000_Fruit | Fruit salad, Puerto Rican style                                                           | 84 | 4.5 | A | 1 |
| 62113220 | 2000_Fruit | Fig, dried, cooked, unsweetened                                                           | 84 | 4   | B | 1 |
| 63107010 | 2000_Fruit | Banana, raw                                                                               | 83 | 4.5 | A | 1 |
| 63107050 | 2000_Fruit | Banana, white, Guineo blanco maduro                                                       | 83 | 4.5 | A | 1 |
| 63107070 | 2000_Fruit | Banana, Chinese, raw                                                                      | 83 | 4.5 | A | 1 |
| 63107080 | 2000_Fruit | Banana, red, Guineo morado                                                                | 83 | 4.5 | A | 1 |
| 63137120 | 2000_Fruit | Pear, cooked or canned, unsweetened, water pack                                           | 83 | 4.5 | A | 1 |
| 62122220 | 2000_Fruit | Prune, dried, cooked, unsweetened                                                         | 82 | 4   | B | 1 |
| 63115120 | 2000_Fruit | Cherries, sweet, cooked, unsweetened, water pack                                          | 82 | 4.5 | B | 1 |
| 63107310 | 2000_Fruit | Banana, ripe, boiled                                                                      | 81 | 4.5 | A | 1 |
| 63135170 | 2000_Fruit | Peach, cooked or canned, juice pack                                                       | 80 | 4.5 | B | 3 |
| 62119100 | 2000_Fruit | Pear, dried, uncooked                                                                     | 80 | 3.5 | C | 1 |
| 63403030 | 2000_Fruit | Fruit salad, including citrus fruits, with nondairy whipped topping                       | 80 | 4   | A | 4 |
| 63115170 | 2000_Fruit | Cherries, sweet, cooked or canned, juice pack                                             | 80 | 4.5 | A | 3 |
| 63123120 | 2000_Fruit | Grapes, seedless, cooked or canned, unsweetened, water pack                               | 79 | 4   | B | 1 |
| 63145010 | 2000_Fruit | Pomegranate, raw                                                                          | 79 | 4.5 | A | 1 |
| 62105000 | 2000_Fruit | Blueberries, dried                                                                        | 79 | 3.5 | B | 1 |
| 62119220 | 2000_Fruit | Pear, dried, cooked, unsweetened                                                          | 79 | 4.5 | B | 1 |
| 63101120 | 2000_Fruit | Applesauce, stewed apples, unsweetened                                                    | 78 | 4.5 | B | 1 |
| 63101140 | 2000_Fruit | Applesauce, stewed apples, sweetened with low calorie sweetener                           | 78 | 4.5 | B | 1 |
| 62114110 | 2000_Fruit | Papaya, dried                                                                             | 78 | 3   | C | 1 |
| 63141150 | 2000_Fruit | Pineapple, cooked or canned, drained solids                                               | 78 | 4   | B | 3 |
| 62120100 | 2000_Fruit | Pineapple, dried                                                                          | 78 | 3   | C | 1 |
| 63119120 | 2000_Fruit | Fig, cooked or canned, unsweetened, water pack                                            | 77 | 4.5 | A | 1 |
| 63402970 | 2000_Fruit | Fruit salad, excluding citrus fruits, with nondairy whipped topping                       | 77 | 4   | A | 4 |
| 63119010 | 2000_Fruit | Fig, raw                                                                                  | 77 | 4.5 | A | 1 |
| 62110100 | 2000_Fruit | Date                                                                                      | 76 | 3.5 | C | 1 |
| 63143120 | 2000_Fruit | Plum, cooked or canned, unsweetened, water pack                                           | 75 | 4   | B | 3 |
| 63201800 | 2000_Fruit | Blackberries, frozen, sweetened, NS as to type of sweetener                               | 75 | 4.5 | B | 3 |
| 63403020 | 2000_Fruit | Fruit salad, including citrus fruit, with whipped cream                                   | 75 | 4   | B | 4 |
| 63311120 | 2000_Fruit | Fruit cocktail, cooked or canned, unsweetened, water pack                                 | 74 | 4.5 | A | 4 |
| 63402990 | 2000_Fruit | Fruit salad, including citrus fruits, with pudding                                        | 74 | 4.5 | A | 4 |
| 63413010 | 2000_Fruit | Pineapple salad with dressing                                                             | 73 | 4   | B | 4 |
| 63403010 | 2000_Fruit | Fruit salad, including citrus fruits, with salad dressing or mayonnaise                   | 72 | 4   | C | 4 |
| 63301010 | 2000_Fruit | Ambrosia                                                                                  | 72 | 4.5 | A | 1 |
| 63402960 | 2000_Fruit | Fruit salad, excluding citrus fruits, with whipped cream                                  | 72 | 4   | B | 4 |
| 62125100 | 2000_Fruit | Raisins                                                                                   | 72 | 3   | C | 1 |
| 63401010 | 2000_Fruit | Apple salad with dressing                                                                 | 72 | 4   | B | 4 |
| 63143170 | 2000_Fruit | Plum, cooked or canned, juice pack                                                        | 72 | 4   | B | 3 |
| 63403000 | 2000_Fruit | Fruit salad, excluding citrus fruits, with pudding                                        | 72 | 4.5 | A | 4 |
| 63137170 | 2000_Fruit | Pear, cooked or canned, juice pack                                                        | 71 | 4.5 | A | 3 |
| 63141110 | 2000_Fruit | Pineapple, cooked or canned, NS as to sweetened or unsweetened; sweetened, NS as to type  | 71 | 4   | B | 3 |
| 63141170 | 2000_Fruit | Pineapple, cooked or canned, juice pack                                                   | 71 | 4   | B | 3 |
| 63402950 | 2000_Fruit | Fruit salad, excluding citrus fruits, with salad dressing or mayonnaise                   | 70 | 4   | C | 4 |
| 62116200 | 2000_Fruit | Peach, dried, cooked, NS as to sweetened or unsweetened; sweetened, NS as to type of swe  | 69 | 4   | B | 1 |
| 63115150 | 2000_Fruit | Cherries, sweet, cooked or canned, drained solids                                         | 69 | 4   | B | 3 |
| 63115110 | 2000_Fruit | Cherries, sweet, cooked or canned, NS as to sweetened or unsweetened; sweetened, NS as to | 68 | 4.5 | B | 3 |
| 63109750 | 2000_Fruit | Starfruit, cooked, with sugar                                                             | 68 | 4.5 | A | 3 |
| 62116230 | 2000_Fruit | Peach, dried, cooked, with sugar                                                          | 68 | 4   | B | 1 |
| 63148750 | 2000_Fruit | Tamarind, raw                                                                             | 67 | 4   | C | 1 |
| 62104200 | 2000_Fruit | Apricot, dried, cooked, NS as to sweetened or unsweetened; sweetened, NS as to type of sw | 67 | 4   | C | 1 |
| 63219600 | 2000_Fruit | Raspberries, frozen, NS as to added sweetener                                             | 67 | 4   | B | 3 |
| 63219620 | 2000_Fruit | Raspberries, frozen, with sugar                                                           | 67 | 4   | B | 3 |
| 63107110 | 2000_Fruit | Banana, baked                                                                             | 67 | 4   | B | 1 |
| 63403040 | 2000_Fruit | Fruit salad, including citrus fruits, with marshmallows                                   | 66 | 4   | C | 4 |
| 63311170 | 2000_Fruit | Fruit cocktail, cooked or canned, juice pack                                              | 66 | 4.5 | B | 4 |
| 63203550 | 2000_Fruit | Blueberries, frozen, sweetened                                                            | 66 | 4   | B | 3 |
| 62104230 | 2000_Fruit | Apricot, dried, cooked, with sugar                                                        | 66 | 4   | C | 1 |
| 62113200 | 2000_Fruit | Fig, dried, cooked, NS as to sweetened or unsweetened; sweetened, NS as to type of sweet  | 65 | 4   | B | 1 |
| 63402045 | 2000_Fruit | Fried dwarf banana, Puerto Rican style                                                    | 65 | 4   | B | 4 |
| 63203110 | 2000_Fruit | Blueberries, cooked or canned, NS as to sweetened or unsweetened; sweetened, NS as to ty  | 65 | 4   | B | 3 |
| 63203125 | 2000_Fruit | Blueberries, cooked or canned, in light syrup                                             | 65 | 4   | B | 3 |
| 61110230 | 2000_Fruit | Kumquat, cooked or canned, in syrup                                                       | 65 | 4.5 | B | 3 |
| 63115140 | 2000_Fruit | Cherries, sweet, cooked or canned, in light syrup                                         | 65 | 4   | B | 3 |
| 63103150 | 2000_Fruit | Apricot, cooked or canned, drained solids                                                 | 65 | 4   | B | 3 |
| 63402980 | 2000_Fruit | Fruit salad, excluding citrus fruits, with marshmallows                                   | 64 | 4   | C | 4 |
| 63107210 | 2000_Fruit | Banana, ripe, fried                                                                       | 64 | 4   | B | 4 |
| 63107090 | 2000_Fruit | Banana, red, fried                                                                        | 64 | 4   | B | 4 |
| 62113230 | 2000_Fruit | Fig, dried, cooked, with sugar                                                            | 64 | 4   | C | 1 |
| 61104200 | 2000_Fruit | Grapefruit and orange sections, cooked, canned, or frozen, NS as to added sweetener       | 64 | 4   | B | 3 |

Supplementary Table 8. Original (uncorrected) scores for all food items.

|          |            |                                                                                            |    |     |   |   |
|----------|------------|--------------------------------------------------------------------------------------------|----|-----|---|---|
| 61104230 | 2000_Fruit | Grapefruit and orange sections, cooked, canned, or frozen, in light syrup                  | 64 | 4   | B | 3 |
| 63141140 | 2000_Fruit | Pineapple, cooked or canned, in light syrup                                                | 64 | 4   | B | 3 |
| 63201110 | 2000_Fruit | Blackberries, cooked or canned, NS as to sweetened or unsweetened; sweetened, NS as to t   | 64 | 4   | B | 3 |
| 63201130 | 2000_Fruit | Blackberries, cooked or canned, in heavy syrup                                             | 64 | 4   | B | 3 |
| 62122200 | 2000_Fruit | Prune, dried, cooked, NS as to sweetened or unsweetened; sweetened, NS as to type of swe   | 64 | 3.5 | C | 1 |
| 62126000 | 2000_Fruit | Tamarind pulp, dried, sweetened                                                            | 63 | 3.5 | C | 3 |
| 62109100 | 2000_Fruit | Cranberries, dried                                                                         | 63 | 3.5 | C | 3 |
| 62119200 | 2000_Fruit | Pear, dried, cooked, NS as to sweetened or unsweetened; sweetened, NS as to type of sweet  | 63 | 4   | C | 1 |
| 63147140 | 2000_Fruit | Rhubarb, cooked or canned, in light syrup                                                  | 63 | 4.5 | B | 3 |
| 62122230 | 2000_Fruit | Prune, dried, cooked, with sugar                                                           | 63 | 3.5 | C | 1 |
| 63411010 | 2000_Fruit | Cranberry salad, congealed                                                                 | 63 | 4   | B | 4 |
| 63125100 | 2000_Fruit | Guava shell, canned in heavy syrup                                                         | 62 | 4.5 | A | 3 |
| 63131110 | 2000_Fruit | Nectarine, cooked                                                                          | 62 | 4   | B | 1 |
| 62119230 | 2000_Fruit | Pear, dried, cooked, with sugar                                                            | 62 | 4   | C | 1 |
| 63101210 | 2000_Fruit | Apple, cooked or canned, with syrup                                                        | 60 | 4.5 | B | 3 |
| 61122330 | 2000_Fruit | Orange, mandarin, canned or frozen, in light syrup                                         | 60 | 4   | C | 3 |
| 63135150 | 2000_Fruit | Peach, cooked or canned, drained solids                                                    | 60 | 4   | B | 3 |
| 63101310 | 2000_Fruit | Apple, baked, NS as to added sweetener                                                     | 59 | 4   | B | 3 |
| 63101330 | 2000_Fruit | Apple, baked, with sugar                                                                   | 59 | 4   | B | 3 |
| 62101000 | 2000_Fruit | Fruit, dried, NFS, uncooked                                                                | 59 | 3.5 | C | 3 |
| 63115130 | 2000_Fruit | Cherries, sweet, cooked or canned, in heavy syrup                                          | 58 | 4   | C | 3 |
| 63135610 | 2000_Fruit | Peach, frozen, NS as to added sweetener                                                    | 58 | 4   | C | 3 |
| 63135630 | 2000_Fruit | Peach, frozen, with sugar                                                                  | 58 | 4   | C | 3 |
| 63103140 | 2000_Fruit | Apricot, cooked or canned, in light syrup                                                  | 58 | 4   | B | 3 |
| 63219110 | 2000_Fruit | Raspberries, cooked or canned, NS as to sweetened or unsweetened; sweetened, NS as to t    | 58 | 4   | B | 3 |
| 63219130 | 2000_Fruit | Raspberries, cooked or canned, in heavy syrup                                              | 58 | 4   | B | 3 |
| 63223600 | 2000_Fruit | Strawberries, frozen, NS as to added sweetener                                             | 58 | 4   | C | 3 |
| 63223620 | 2000_Fruit | Strawberries, frozen, with sugar                                                           | 58 | 4   | C | 3 |
| 63119140 | 2000_Fruit | Figs, cooked or canned, in light syrup                                                     | 58 | 4   | B | 3 |
| 63137150 | 2000_Fruit | Pear, cooked or canned, drained solids                                                     | 57 | 4.5 | A | 3 |
| 63135110 | 2000_Fruit | Peach, cooked or canned, NS as to sweetened or unsweetened; sweetened, NS as to type of    | 57 | 4   | B | 3 |
| 63135140 | 2000_Fruit | Peach, cooked or canned, in light or medium syrup                                          | 57 | 4   | B | 3 |
| 62101200 | 2000_Fruit | Apple, dried, cooked, NS as to sweetened or unsweetened; sweetened, NS as to type of swe   | 57 | 4   | B | 1 |
| 61101230 | 2000_Fruit | Grapefruit, canned or frozen, in light syrup                                               | 56 | 4   | C | 3 |
| 63223110 | 2000_Fruit | Strawberries, cooked or canned, NS as to sweetened or unsweetened; sweetened, NS as to t   | 56 | 4   | C | 3 |
| 63223130 | 2000_Fruit | Strawberries, cooked or canned, in syrup                                                   | 56 | 4   | C | 3 |
| 63133100 | 2000_Fruit | Papaya, cooked or canned, in sugar or syrup                                                | 55 | 4   | C | 3 |
| 63101150 | 2000_Fruit | Applesauce with other fruits                                                               | 55 | 4   | B | 3 |
| 62106000 | 2000_Fruit | Cherries, dried                                                                            | 55 | 3.5 | D | 1 |
| 62101230 | 2000_Fruit | Apple, dried, cooked, with sugar                                                           | 55 | 4   | C | 1 |
| 62121100 | 2000_Fruit | Plum, rock salt, dried                                                                     | 54 | 0.5 | E | 3 |
| 63203130 | 2000_Fruit | Blueberries, cooked or canned, in heavy syrup                                              | 54 | 4   | C | 3 |
| 63307010 | 2000_Fruit | Cranberry-orange relish, uncooked                                                          | 54 | 4   | C | 3 |
| 63101110 | 2000_Fruit | Applesauce, stewed apples, NS as to sweetened or unsweetened; sweetened, NS as to type     | 54 | 4   | B | 3 |
| 63101130 | 2000_Fruit | Applesauce, stewed apples, with sugar                                                      | 54 | 4   | B | 3 |
| 63119110 | 2000_Fruit | Fig, cooked or canned, NS as to sweetened or unsweetened; sweetened, NS as to type of sw   | 52 | 4   | B | 3 |
| 63119130 | 2000_Fruit | Fig, cooked or canned, in heavy syrup                                                      | 52 | 4   | B | 3 |
| 63126600 | 2000_Fruit | Lychee, cooked or canned, in sugar or syrup                                                | 52 | 4   | C | 3 |
| 62125110 | 2000_Fruit | Raisins, cooked                                                                            | 52 | 3   | D | 1 |
| 63137110 | 2000_Fruit | Pear, cooked or canned, NS as to sweetened or unsweetened; sweetened, NS as to type of s   | 51 | 4.5 | B | 3 |
| 63137140 | 2000_Fruit | Pear, cooked or canned, in light syrup                                                     | 51 | 4.5 | B | 3 |
| 63402050 | 2000_Fruit | Fried dwarf banana with cheese, Puerto Rican style                                         | 51 | 4   | B | 4 |
| 63103110 | 2000_Fruit | Apricot, cooked or canned, NS as to sweetened or unsweetened; sweetened, NS as to type c   | 51 | 4   | C | 3 |
| 63103130 | 2000_Fruit | Apricot, cooked or canned, in heavy syrup                                                  | 51 | 4   | C | 3 |
| 63135660 | 2000_Fruit | Peach, spiced                                                                              | 51 | 4   | C | 3 |
| 63141130 | 2000_Fruit | Pineapple, cooked or canned, in heavy syrup                                                | 51 | 4   | B | 3 |
| 63311150 | 2000_Fruit | Fruit cocktail, cooked or canned, drained solids                                           | 50 | 4   | B | 4 |
| 63147600 | 2000_Fruit | Rhubarb, frozen, NS as to sweetened or unsweetened; sweetened, NS as to type of sweeten    | 49 | 4   | C | 3 |
| 63135130 | 2000_Fruit | Peach, cooked or canned, in heavy syrup                                                    | 49 | 4   | C | 3 |
| 63147620 | 2000_Fruit | Rhubarb, frozen, with sugar                                                                | 49 | 4   | C | 3 |
| 63147150 | 2000_Fruit | Rhubarb, cooked or canned, drained solids                                                  | 49 | 4   | C | 3 |
| 63123110 | 2000_Fruit | Grapes, seedless, cooked or canned, NS as to sweetened or unsweetened; sweetened, NS as    | 48 | 4   | C | 3 |
| 63123130 | 2000_Fruit | Grapes, seedless, cooked or canned, in heavy syrup                                         | 48 | 4   | C | 3 |
| 63137130 | 2000_Fruit | Pear, cooked or canned, in heavy syrup                                                     | 47 | 4   | B | 3 |
| 63129020 | 2000_Fruit | Mango, pickled                                                                             | 47 | 3.5 | C | 3 |
| 63143150 | 2000_Fruit | Plum, cooked or canned, drained solids                                                     | 46 | 4   | C | 3 |
| 63143140 | 2000_Fruit | Plum, cooked or canned, in light syrup                                                     | 46 | 4   | B | 3 |
| 63147110 | 2000_Fruit | Rhubarb, cooked or canned, NS as to sweetened or unsweetened; sweetened, NS as to type     | 46 | 3.5 | C | 3 |
| 63147130 | 2000_Fruit | Rhubarb, cooked or canned, in heavy syrup                                                  | 46 | 3.5 | C | 3 |
| 63311140 | 2000_Fruit | Fruit cocktail, cooked or canned, in light syrup                                           | 45 | 4   | B | 4 |
| 63311110 | 2000_Fruit | Fruit cocktail, cooked or canned, NS as to sweetened or unsweetened; sweetened, NS as to t | 45 | 4   | B | 4 |
| 63101420 | 2000_Fruit | Apple, pickled                                                                             | 45 | 3.5 | C | 3 |
| 62114050 | 2000_Fruit | Mango, dried                                                                               | 43 | 3.5 | D | 4 |
| 63135650 | 2000_Fruit | Peach, pickled                                                                             | 43 | 4   | C | 3 |
| 63311145 | 2000_Fruit | Tropical fruit cocktail, cooked or canned, in light syrup                                  | 43 | 4   | B | 4 |
| 63143650 | 2000_Fruit | Plum, pickled                                                                              | 42 | 3.5 | C | 3 |
| 63307100 | 2000_Fruit | Cranberry-raspberry Sauce                                                                  | 42 | 3.5 | C | 3 |
| 63401070 | 2000_Fruit | Fruit, chocolate covered                                                                   | 41 | 4   | C | 4 |
| 63101410 | 2000_Fruit | Apple rings, fried                                                                         | 41 | 4   | B | 4 |
| 62107200 | 2000_Fruit | Banana chips                                                                               | 40 | 1.5 | E | 4 |
| 63402010 | 2000_Fruit | Banana whip                                                                                | 40 | 3.5 | C | 3 |
| 63311130 | 2000_Fruit | Fruit cocktail, cooked or canned, in heavy syrup                                           | 39 | 4   | B | 4 |
| 63143110 | 2000_Fruit | Plum, cooked or canned, NS as to sweetened or unsweetened; sweetened, NS as to type of :   | 38 | 4   | C | 3 |
| 63143130 | 2000_Fruit | Plum, cooked or canned, in heavy syrup                                                     | 38 | 4   | C | 3 |
| 63402030 | 2000_Fruit | Prune whip                                                                                 | 38 | 3.5 | C | 3 |
| 63401990 | 2000_Fruit | Banana, chocolate-covered with nuts                                                        | 34 | 3.5 | C | 4 |

Supplementary Table 8. Original (uncorrected) scores for all food items.

|          |            |                                                  |    |     |   |   |
|----------|------------|--------------------------------------------------|----|-----|---|---|
| 63107410 | 2000_Fruit | Banana, batter-dipped, fried                     | 31 | 3.5 | B | 4 |
| 63401060 | 2000_Fruit | Apple, candied                                   | 28 | 4   | C | 4 |
| 63111010 | 2000_Fruit | Cherries, maraschino                             | 26 | 3.5 | C | 4 |
| 63207000 | 2000_Fruit | Cranberries, NS as to raw, cooked, or canned     | 25 | 3.5 | C | 4 |
| 63207110 | 2000_Fruit | Cranberries, cooked or canned                    | 25 | 3.5 | C | 4 |
| 63101500 | 2000_Fruit | Apple, fried                                     | 19 | 4   | C | 4 |
| 63403100 | 2000_Fruit | Fruit dessert with cream and/or pudding and nuts | 17 | 3   | D | 4 |

Supplementary Table 8. Original (uncorrected) scores for all food items.

| foodcode | level1nd        | Description                                                     | Food Compass Score | Health Star Rating | Nutri-Score | NOVA Category |
|----------|-----------------|-----------------------------------------------------------------|--------------------|--------------------|-------------|---------------|
| 63105010 | 3000_Vegetables | Avocado, raw                                                    | 100                | 5                  | A           | 1             |
| 72101100 | 3000_Vegetables | Beet greens, raw                                                | 100                | 4.5                | A           | 1             |
| 72101210 | 3000_Vegetables | Beet greens, cooked, fat not added in cooking                   | 100                | 4.5                | A           | 1             |
| 72101230 | 3000_Vegetables | Beet greens, cooked, made with oil                              | 100                | 4                  | B           | 4             |
| 72101250 | 3000_Vegetables | Beet greens, cooked, made with margarine                        | 100                | 4                  | B           | 4             |
| 72103000 | 3000_Vegetables | Broccoli raab, raw                                              | 100                | 5                  | A           | 1             |
| 72103020 | 3000_Vegetables | Broccoli raab, cooked, fat not added in cooking                 | 100                | 4.5                | A           | 3             |
| 72103040 | 3000_Vegetables | Broccoli raab, cooked, made with oil                            | 100                | 4.5                | A           | 4             |
| 72103060 | 3000_Vegetables | Broccoli raab, cooked, made with margarine                      | 100                | 4.5                | A           | 4             |
| 72104100 | 3000_Vegetables | Chard, raw                                                      | 100                | 4.5                | A           | 1             |
| 72104210 | 3000_Vegetables | Chard, cooked, fat not added in cooking                         | 100                | 4.5                | A           | 1             |
| 72104230 | 3000_Vegetables | Chard, cooked, made with oil                                    | 100                | 4.5                | B           | 4             |
| 72104250 | 3000_Vegetables | Chard, cooked, made with margarine                              | 100                | 4.5                | A           | 4             |
| 72107100 | 3000_Vegetables | Collards, raw                                                   | 100                | 5                  | A           | 1             |
| 72107210 | 3000_Vegetables | Collards, cooked, NS as to form, fat not added in cooking       | 100                | 5                  | A           | 3             |
| 72107211 | 3000_Vegetables | Collards, cooked, from fresh, fat not added in cooking          | 100                | 5                  | A           | 3             |
| 72107212 | 3000_Vegetables | Collards, cooked, from frozen, fat not added in cooking         | 100                | 4.5                | A           | 3             |
| 72107213 | 3000_Vegetables | Collards, cooked, from canned, fat not added in cooking         | 100                | 4.5                | A           | 3             |
| 72107224 | 3000_Vegetables | Collards, cooked, NS as to form, made with oil                  | 100                | 5                  | A           | 3             |
| 72107226 | 3000_Vegetables | Collards, cooked, NS as to form, made with margarine            | 100                | 5                  | A           | 4             |
| 72107227 | 3000_Vegetables | Collards, cooked, from fresh, made with oil                     | 100                | 5                  | A           | 3             |
| 72107229 | 3000_Vegetables | Collards, cooked, from fresh, made with margarine               | 100                | 5                  | A           | 4             |
| 72107230 | 3000_Vegetables | Collards, cooked, from frozen, made with oil                    | 100                | 4.5                | A           | 3             |
| 72107232 | 3000_Vegetables | Collards, cooked, from frozen, made with margarine              | 100                | 4.5                | A           | 4             |
| 72107233 | 3000_Vegetables | Collards, cooked, from canned, made with oil                    | 100                | 4.5                | A           | 3             |
| 72110100 | 3000_Vegetables | Cress, raw                                                      | 100                | 4.5                | A           | 1             |
| 72110210 | 3000_Vegetables | Cress, cooked, NS as to form, fat not added in cooking          | 100                | 4                  | A           | 3             |
| 72110211 | 3000_Vegetables | Cress, cooked, from fresh, fat not added in cooking             | 100                | 4                  | A           | 3             |
| 72110213 | 3000_Vegetables | Cress, cooked, from canned, fat not added in cooking            | 100                | 4                  | A           | 3             |
| 72110230 | 3000_Vegetables | Cress, cooked, NS as to form, made with oil                     | 100                | 4                  | B           | 4             |
| 72110232 | 3000_Vegetables | Cress, cooked, NS as to form, made with margarine               | 100                | 4                  | B           | 4             |
| 72110233 | 3000_Vegetables | Cress, cooked, from fresh, made with oil                        | 100                | 4                  | B           | 4             |
| 72110235 | 3000_Vegetables | Cress, cooked, from fresh, made with margarine                  | 100                | 4                  | B           | 4             |
| 72110236 | 3000_Vegetables | Cress, cooked, from canned, made with oil                       | 100                | 4                  | B           | 4             |
| 72110238 | 3000_Vegetables | Cress, cooked, from canned, made with margarine                 | 100                | 4                  | B           | 4             |
| 72113100 | 3000_Vegetables | Dandelion greens, raw                                           | 100                | 5                  | A           | 1             |
| 72113210 | 3000_Vegetables | Dandelion greens, cooked, fat not added in cooking              | 100                | 4.5                | A           | 3             |
| 72113230 | 3000_Vegetables | Dandelion greens, cooked, made with oil                         | 100                | 4.5                | A           | 4             |
| 72113250 | 3000_Vegetables | Dandelion greens, cooked, made with margarine                   | 100                | 4.5                | A           | 4             |
| 72116000 | 3000_Vegetables | Romaine lettuce, raw                                            | 100                | 5                  | A           | 1             |
| 72116200 | 3000_Vegetables | Escarole, cooked, NS as to fat added in cooking                 | 100                | 4.5                | A           | 4             |
| 72116210 | 3000_Vegetables | Escarole, cooked, fat not added in cooking                      | 100                | 4.5                | A           | 3             |
| 72116220 | 3000_Vegetables | Escarole, cooked, fat added in cooking, NS as to type of fat    | 100                | 4.5                | A           | 4             |
| 72116221 | 3000_Vegetables | Escarole, cooked, made with oil                                 | 100                | 4.5                | A           | 4             |
| 72116223 | 3000_Vegetables | Escarole, cooked, made with margarine                           | 100                | 4.5                | A           | 4             |
| 72118210 | 3000_Vegetables | Greens, cooked, NS as to form, fat not added in cooking         | 100                | 4.5                | A           | 3             |
| 72118211 | 3000_Vegetables | Greens, cooked, from fresh, fat not added in cooking            | 100                | 4.5                | A           | 3             |
| 72118212 | 3000_Vegetables | Greens, cooked, from frozen, fat not added in cooking           | 100                | 4.5                | A           | 3             |
| 72118213 | 3000_Vegetables | Greens, cooked, from canned, fat not added in cooking           | 100                | 4.5                | A           | 3             |
| 72118224 | 3000_Vegetables | Greens, cooked, NS as to form, made with oil                    | 100                | 4.5                | A           | 3             |
| 72118226 | 3000_Vegetables | Greens, cooked, NS as to form, made with margarine              | 100                | 4.5                | A           | 4             |
| 72118227 | 3000_Vegetables | Greens, cooked, from fresh, made with oil                       | 100                | 4.5                | A           | 3             |
| 72118229 | 3000_Vegetables | Greens, cooked, from fresh, made with margarine                 | 100                | 4.5                | A           | 4             |
| 72118230 | 3000_Vegetables | Greens, cooked, from frozen, made with oil                      | 100                | 4.5                | A           | 4             |
| 72118232 | 3000_Vegetables | Greens, cooked, from frozen, made with margarine                | 100                | 4.5                | A           | 4             |
| 72118233 | 3000_Vegetables | Greens, cooked, from canned, made with oil                      | 100                | 4.5                | A           | 3             |
| 72118235 | 3000_Vegetables | Greens, cooked, from canned, made with margarine                | 100                | 4.5                | A           | 4             |
| 72118300 | 3000_Vegetables | Chamnamul, cooked, NS as to fat added in cooking                | 100                | 4                  | B           | 4             |
| 72118305 | 3000_Vegetables | Chamnamul, cooked, fat not added in cooking                     | 100                | 4                  | A           | 4             |
| 72118310 | 3000_Vegetables | Chamnamul, cooked, fat added in cooking                         | 100                | 4                  | B           | 4             |
| 72119190 | 3000_Vegetables | Kale, raw                                                       | 100                | 5                  | A           | 1             |
| 72119210 | 3000_Vegetables | Kale, cooked, NS as to form, fat not added in cooking           | 100                | 4.5                | A           | 3             |
| 72119211 | 3000_Vegetables | Kale, cooked, from fresh, fat not added in cooking              | 100                | 4.5                | A           | 3             |
| 72119212 | 3000_Vegetables | Kale, cooked, from frozen, fat not added in cooking             | 100                | 4.5                | A           | 1             |
| 72119213 | 3000_Vegetables | Kale, cooked, from canned, fat not added in cooking             | 100                | 4.5                | A           | 3             |
| 72119224 | 3000_Vegetables | Kale, cooked, NS as to form, made with oil                      | 100                | 4.5                | A           | 4             |
| 72119226 | 3000_Vegetables | Kale, cooked, NS as to form, made with margarine                | 100                | 4.5                | A           | 4             |
| 72119227 | 3000_Vegetables | Kale, cooked, from fresh, made with oil                         | 100                | 4.5                | A           | 4             |
| 72119229 | 3000_Vegetables | Kale, cooked, from fresh, made with margarine                   | 100                | 4.5                | A           | 4             |
| 72119230 | 3000_Vegetables | Kale, cooked, from frozen, made with oil                        | 100                | 4.5                | B           | 4             |
| 72119232 | 3000_Vegetables | Kale, cooked, from frozen, made with margarine                  | 100                | 4.5                | B           | 4             |
| 72119233 | 3000_Vegetables | Kale, cooked, from canned, made with oil                        | 100                | 4.5                | B           | 4             |
| 72120210 | 3000_Vegetables | Lambsquarter, cooked, fat not added in cooking                  | 100                | 4.5                | A           | 1             |
| 72120230 | 3000_Vegetables | Lambsquarter, cooked, made with oil                             | 100                | 4.5                | A           | 4             |
| 72120250 | 3000_Vegetables | Lambsquarter, cooked, made with margarine                       | 100                | 4.5                | A           | 4             |
| 72121210 | 3000_Vegetables | Mustard cabbage, cooked, fat not added in cooking               | 100                | 4.5                | A           | 3             |
| 72122100 | 3000_Vegetables | Mustard greens, raw                                             | 100                | 5                  | A           | 1             |
| 72122210 | 3000_Vegetables | Mustard greens, cooked, NS as to form, fat not added in cooking | 100                | 4.5                | A           | 3             |
| 72122211 | 3000_Vegetables | Mustard greens, cooked, from fresh, fat not added in cooking    | 100                | 4.5                | A           | 3             |
| 72122212 | 3000_Vegetables | Mustard greens, cooked, from frozen, fat not added in cooking   | 100                | 4.5                | A           | 3             |
| 72122213 | 3000_Vegetables | Mustard greens, cooked, from canned, fat not added in cooking   | 100                | 4.5                | A           | 3             |
| 72122224 | 3000_Vegetables | Mustard greens, cooked, NS as to form, made with oil            | 100                | 4.5                | A           | 3             |
| 72122226 | 3000_Vegetables | Mustard greens, cooked, NS as to form, made with margarine      | 100                | 4.5                | A           | 4             |
| 72122227 | 3000_Vegetables | Mustard greens, cooked, from fresh, made with oil               | 100                | 4.5                | A           | 3             |
| 72122229 | 3000_Vegetables | Mustard greens, cooked, from fresh, made with margarine         | 100                | 4.5                | A           | 4             |

Supplementary Table 8. Original (uncorrected) scores for all food items.

|          |                 |                                                                                              |     |     |   |   |
|----------|-----------------|----------------------------------------------------------------------------------------------|-----|-----|---|---|
| 72122230 | 3000_Vegetables | Mustard greens, cooked, from frozen, made with oil                                           | 100 | 4.5 | A | 3 |
| 72122232 | 3000_Vegetables | Mustard greens, cooked, from frozen, made with margarine                                     | 100 | 4.5 | A | 4 |
| 72122233 | 3000_Vegetables | Mustard greens, cooked, from canned, made with oil                                           | 100 | 4.5 | B | 3 |
| 72122235 | 3000_Vegetables | Mustard greens, cooked, from canned, made with margarine                                     | 100 | 4.5 | A | 4 |
| 72123010 | 3000_Vegetables | Poke greens, cooked, fat not added in cooking                                                | 100 | 4.5 | A | 3 |
| 72123030 | 3000_Vegetables | Poke greens, cooked, made with oil                                                           | 100 | 4.5 | A | 4 |
| 72123050 | 3000_Vegetables | Poke greens, cooked, made with margarine                                                     | 100 | 4.5 | A | 4 |
| 72124100 | 3000_Vegetables | Radicchio, raw                                                                               | 100 | 4.5 | A | 1 |
| 72125100 | 3000_Vegetables | Spinach, raw                                                                                 | 100 | 5   | A | 1 |
| 72125201 | 3000_Vegetables | Spinach, cooked, from fresh, NS as to fat added in cooking                                   | 100 | 4.5 | A | 4 |
| 72125203 | 3000_Vegetables | Spinach, cooked, from canned, NS as to fat added in cooking                                  | 100 | 4.5 | A | 4 |
| 72125210 | 3000_Vegetables | Spinach, cooked, NS as to form, fat not added in cooking                                     | 100 | 4.5 | A | 3 |
| 72125211 | 3000_Vegetables | Spinach, cooked, from fresh, fat not added in cooking                                        | 100 | 4.5 | A | 3 |
| 72125212 | 3000_Vegetables | Spinach, cooked, from frozen, fat not added in cooking                                       | 100 | 4.5 | A | 3 |
| 72125213 | 3000_Vegetables | Spinach, cooked, from canned, fat not added in cooking                                       | 100 | 4.5 | A | 3 |
| 72125214 | 3000_Vegetables | Spinach, cooked, NS as to form, made with oil                                                | 100 | 4.5 | A | 4 |
| 72125216 | 3000_Vegetables | Spinach, cooked, NS as to form, made with margarine                                          | 100 | 4.5 | A | 4 |
| 72125217 | 3000_Vegetables | Spinach, cooked, from fresh, made with oil                                                   | 100 | 4.5 | A | 4 |
| 72125219 | 3000_Vegetables | Spinach, cooked, from fresh, made with margarine                                             | 100 | 4.5 | A | 4 |
| 72125221 | 3000_Vegetables | Spinach, cooked, from fresh, fat added in cooking, NS as to type of fat                      | 100 | 4.5 | A | 4 |
| 72125223 | 3000_Vegetables | Spinach, cooked, from canned, fat added in cooking, NS as to type of fat                     | 100 | 4.5 | A | 4 |
| 72125224 | 3000_Vegetables | Spinach, cooked, from frozen, made with oil                                                  | 100 | 4.5 | A | 4 |
| 72125226 | 3000_Vegetables | Spinach, cooked, from frozen, made with margarine                                            | 100 | 4.5 | A | 4 |
| 72125227 | 3000_Vegetables | Spinach, cooked, from canned, made with oil                                                  | 100 | 4.5 | A | 4 |
| 72125229 | 3000_Vegetables | Spinach, cooked, from canned, made with margarine                                            | 100 | 4.5 | A | 4 |
| 72126000 | 3000_Vegetables | Taro leaves, cooked, fat not added in cooking                                                | 100 | 5   | A | 1 |
| 72127000 | 3000_Vegetables | Thistle leaves, cooked, fat not added in cooking                                             | 100 | 4   | A | 3 |
| 72128210 | 3000_Vegetables | Turnip greens, cooked, NS as to form, fat not added in cooking                               | 100 | 5   | A | 3 |
| 72128211 | 3000_Vegetables | Turnip greens, cooked, from fresh, fat not added in cooking                                  | 100 | 4.5 | A | 3 |
| 72128212 | 3000_Vegetables | Turnip greens, cooked, from frozen, fat not added in cooking                                 | 100 | 5   | A | 3 |
| 72128213 | 3000_Vegetables | Turnip greens, cooked, from canned, fat not added in cooking                                 | 100 | 4   | A | 3 |
| 72128226 | 3000_Vegetables | Turnip greens, cooked, NS as to form, made with margarine                                    | 100 | 5   | A | 4 |
| 72128227 | 3000_Vegetables | Turnip greens, cooked, from fresh, made with oil                                             | 100 | 4.5 | A | 4 |
| 72128229 | 3000_Vegetables | Turnip greens, cooked, from fresh, made with margarine                                       | 100 | 4.5 | A | 4 |
| 72128230 | 3000_Vegetables | Turnip greens, cooked, from frozen, made with oil                                            | 100 | 5   | A | 4 |
| 72128232 | 3000_Vegetables | Turnip greens, cooked, from frozen, made with margarine                                      | 100 | 5   | A | 4 |
| 72128233 | 3000_Vegetables | Turnip greens, cooked, from canned, made with oil                                            | 100 | 4   | B | 4 |
| 72128235 | 3000_Vegetables | Turnip greens, cooked, from canned, made with margarine                                      | 100 | 4   | B | 4 |
| 72128236 | 3000_Vegetables | Turnip greens, canned, reduced sodium, cooked, NS as to fat added in cooking                 | 100 | 4.5 | A | 4 |
| 72128237 | 3000_Vegetables | Turnip greens, canned, reduced sodium, cooked, fat not added in cooking                      | 100 | 4.5 | A | 1 |
| 72128238 | 3000_Vegetables | Turnip greens, canned, reduced sodium, cooked, fat added in cooking, made with any typ       | 100 | 4.5 | A | 4 |
| 72128410 | 3000_Vegetables | Turnip greens with roots, cooked, NS as to form, fat not added in cooking                    | 100 | 4.5 | A | 3 |
| 72128411 | 3000_Vegetables | Turnip greens with roots, cooked, from fresh, fat not added in cooking                       | 100 | 4.5 | A | 3 |
| 72128412 | 3000_Vegetables | Turnip greens with roots, cooked, from frozen, fat not added in cooking                      | 100 | 4.5 | A | 3 |
| 72128413 | 3000_Vegetables | Turnip greens with roots, cooked, from canned, fat not added in cooking                      | 100 | 4   | A | 3 |
| 72130100 | 3000_Vegetables | Watercress, raw                                                                              | 100 | 4.5 | A | 1 |
| 72130199 | 3000_Vegetables | Watercress, cooked, NS as to fat added in cooking                                            | 100 | 4   | B | 4 |
| 72130200 | 3000_Vegetables | Watercress, cooked, fat not added in cooking                                                 | 100 | 4   | A | 1 |
| 72132200 | 3000_Vegetables | Bitter melon leaves, horseradish leaves, jute leaves, or radish leaves, cooked, fat not adde | 100 | 4   | B | 1 |
| 72133200 | 3000_Vegetables | Sweet potato leaves, squash leaves, pumpkin leaves, chrysanthemum leaves, bean leaves        | 100 | 4   | A | 3 |
| 72201100 | 3000_Vegetables | Broccoli, raw                                                                                | 100 | 5   | A | 1 |
| 72201210 | 3000_Vegetables | Broccoli, cooked, NS as to form, fat not added in cooking                                    | 100 | 4.5 | A | 3 |
| 72201211 | 3000_Vegetables | Broccoli, cooked, from fresh, fat not added in cooking                                       | 100 | 4.5 | A | 3 |
| 72201212 | 3000_Vegetables | Broccoli, cooked, from frozen, fat not added in cooking                                      | 100 | 4.5 | A | 3 |
| 72201213 | 3000_Vegetables | Broccoli, cooked, NS as to form, made with oil                                               | 100 | 4.5 | A | 3 |
| 72201223 | 3000_Vegetables | Broccoli, cooked, from fresh, made with oil                                                  | 100 | 4.5 | A | 4 |
| 72201226 | 3000_Vegetables | Broccoli, cooked, from frozen, made with oil                                                 | 100 | 4.5 | A | 3 |
| 72203000 | 3000_Vegetables | Broccoli, chinese, raw                                                                       | 100 | 4.5 | A | 1 |
| 72203040 | 3000_Vegetables | Broccoli, chinese, cooked, NS as to form, fat not added in cooking                           | 100 | 4   | A | 3 |
| 72203050 | 3000_Vegetables | Broccoli, chinese cooked, from fresh, fat not added in cooking                               | 100 | 4   | A | 3 |
| 72203060 | 3000_Vegetables | Broccoli, chinese, cooked, from frozen, fat not added in cooking                             | 100 | 4   | A | 3 |
| 72203100 | 3000_Vegetables | Broccoli, chinese, cooked, NS as to form, made with margarine                                | 100 | 4   | B | 4 |
| 72203140 | 3000_Vegetables | Broccoli, chinese, cooked, from fresh, made with margarine                                   | 100 | 4   | B | 4 |
| 72203180 | 3000_Vegetables | Broccoli, chinese, cooked, from frozen, made with margarine                                  | 100 | 4   | B | 4 |
| 73101010 | 3000_Vegetables | Carrots, raw                                                                                 | 100 | 4.5 | A | 1 |
| 73103010 | 3000_Vegetables | Carrots, canned, low sodium, fat not added in cooking                                        | 100 | 4.5 | A | 3 |
| 73103021 | 3000_Vegetables | Carrots, canned, low sodium, made with oil                                                   | 100 | 4.5 | A | 3 |
| 73201010 | 3000_Vegetables | Pumpkin, cooked, NS as to form, fat not added in cooking                                     | 100 | 4.5 | A | 3 |
| 73201011 | 3000_Vegetables | Pumpkin, cooked, from fresh, fat not added in cooking                                        | 100 | 4.5 | A | 3 |
| 73201012 | 3000_Vegetables | Pumpkin, cooked, from frozen, fat not added in cooking                                       | 100 | 4.5 | A | 3 |
| 73302010 | 3000_Vegetables | Squash, winter type, raw                                                                     | 100 | 4.5 | A | 1 |
| 74101000 | 3000_Vegetables | Tomatoes, raw                                                                                | 100 | 4.5 | A | 1 |
| 74102000 | 3000_Vegetables | Tomatoes, green, raw                                                                         | 100 | 4.5 | A | 1 |
| 74201000 | 3000_Vegetables | Tomatoes, cooked, NS as to form, NS as to method                                             | 100 | 4.5 | A | 3 |
| 74201001 | 3000_Vegetables | Tomatoes, cooked, from fresh, NS as to method                                                | 100 | 4.5 | A | 3 |
| 74201003 | 3000_Vegetables | Tomatoes, cooked, from canned, NS as to method                                               | 100 | 4.5 | A | 3 |
| 74202010 | 3000_Vegetables | Tomatoes, NS as to form, broiled                                                             | 100 | 4   | B | 3 |
| 74202011 | 3000_Vegetables | Tomatoes, from fresh, broiled                                                                | 100 | 4   | B | 3 |
| 74204500 | 3000_Vegetables | Tomatoes, canned, low sodium                                                                 | 100 | 4.5 | A | 1 |
| 74206000 | 3000_Vegetables | Tomatoes, red, dried                                                                         | 100 | 5   | A | 4 |
| 74504010 | 3000_Vegetables | Tomato and okra, cooked, fat not added in cooking                                            | 100 | 4.5 | A | 3 |
| 74504021 | 3000_Vegetables | Tomato and okra, cooked, made with oil                                                       | 100 | 4.5 | B | 4 |
| 74504150 | 3000_Vegetables | Tomato and celery, cooked, fat not added in cooking                                          | 100 | 4   | A | 3 |
| 75100250 | 3000_Vegetables | Raw vegetable, NFS                                                                           | 100 | 4.5 | A | 1 |
| 75100300 | 3000_Vegetables | Sprouts, NFS                                                                                 | 100 | 4.5 | A | 1 |
| 75100500 | 3000_Vegetables | Alfalfa sprouts, raw                                                                         | 100 | 5   | A | 1 |

Supplementary Table 8. Original (uncorrected) scores for all food items.

|          |                 |                                                                                           |     |     |   |   |
|----------|-----------------|-------------------------------------------------------------------------------------------|-----|-----|---|---|
| 75100800 | 3000_Vegetables | Asparagus, raw                                                                            | 100 | 5   | A | 1 |
| 75101000 | 3000_Vegetables | Bean sprouts, raw                                                                         | 100 | 4.5 | A | 1 |
| 75101800 | 3000_Vegetables | Beans, string, green, raw                                                                 | 100 | 5   | A | 1 |
| 75102600 | 3000_Vegetables | Broccoli, raw                                                                             | 100 | 5   | A | 1 |
| 75102750 | 3000_Vegetables | Brussels sprouts, raw                                                                     | 100 | 5   | A | 1 |
| 75103000 | 3000_Vegetables | Cabbage, green, raw                                                                       | 100 | 4.5 | A | 1 |
| 75104000 | 3000_Vegetables | Cabbage, Chinese, raw                                                                     | 100 | 4.5 | A | 1 |
| 75105000 | 3000_Vegetables | Cabbage, red, raw                                                                         | 100 | 4.5 | A | 1 |
| 75105500 | 3000_Vegetables | Cactus, raw                                                                               | 100 | 4.5 | A | 1 |
| 75107000 | 3000_Vegetables | Cauliflower, raw                                                                          | 100 | 5   | A | 1 |
| 75109000 | 3000_Vegetables | Celery, raw                                                                               | 100 | 4.5 | A | 1 |
| 75109010 | 3000_Vegetables | Fennel bulb, raw                                                                          | 100 | 5   | A | 1 |
| 75111000 | 3000_Vegetables | Cucumber, raw                                                                             | 100 | 4.5 | A | 1 |
| 75111200 | 3000_Vegetables | Eggplant, raw                                                                             | 100 | 5   | A | 1 |
| 75112000 | 3000_Vegetables | Kohlrabi, raw                                                                             | 100 | 5   | A | 1 |
| 75112500 | 3000_Vegetables | Leek, raw                                                                                 | 100 | 4.5 | A | 1 |
| 75113000 | 3000_Vegetables | Lettuce, raw                                                                              | 100 | 4.5 | A | 1 |
| 75113060 | 3000_Vegetables | Lettuce, Boston, raw                                                                      | 100 | 4.5 | A | 1 |
| 75113070 | 3000_Vegetables | Lettuce, manoa                                                                            | 100 | 4.5 | A | 1 |
| 75113080 | 3000_Vegetables | Lettuce, arugula, raw                                                                     | 100 | 4.5 | A | 1 |
| 75114000 | 3000_Vegetables | Mixed salad greens, raw                                                                   | 100 | 4.5 | A | 1 |
| 75115000 | 3000_Vegetables | Mushrooms, raw                                                                            | 100 | 4.5 | A | 1 |
| 75117010 | 3000_Vegetables | Onions, young green, raw                                                                  | 100 | 5   | A | 1 |
| 75120000 | 3000_Vegetables | Peas, green, raw                                                                          | 100 | 5   | A | 1 |
| 75121400 | 3000_Vegetables | Pepper, poblano, raw                                                                      | 100 | 4.5 | A | 1 |
| 75121500 | 3000_Vegetables | Pepper, Serrano, raw                                                                      | 100 | 5   | A | 1 |
| 75122000 | 3000_Vegetables | Pepper, raw, NFS                                                                          | 100 | 4.5 | A | 1 |
| 75122100 | 3000_Vegetables | Pepper, sweet, green, raw                                                                 | 100 | 4.5 | A | 1 |
| 75122200 | 3000_Vegetables | Pepper, sweet, red, raw                                                                   | 100 | 4.5 | A | 1 |
| 75124000 | 3000_Vegetables | Pepper, banana, raw                                                                       | 100 | 5   | A | 1 |
| 75125000 | 3000_Vegetables | Radish, raw                                                                               | 100 | 4.5 | A | 1 |
| 75127000 | 3000_Vegetables | Rutabaga, raw                                                                             | 100 | 4.5 | A | 1 |
| 75127500 | 3000_Vegetables | Seaweed, raw                                                                              | 100 | 4.5 | A | 1 |
| 75127750 | 3000_Vegetables | Snowpeas, raw                                                                             | 100 | 5   | A | 1 |
| 75128000 | 3000_Vegetables | Squash, summer, yellow, raw                                                               | 100 | 4.5 | A | 1 |
| 75128010 | 3000_Vegetables | Squash, summer, green, raw                                                                | 100 | 4.5 | A | 1 |
| 75129000 | 3000_Vegetables | Turnip, raw                                                                               | 100 | 4.5 | A | 1 |
| 75143000 | 3000_Vegetables | Lettuce, salad with assorted vegetables including tomatoes and/or carrots, no dressing    | 100 | 4.5 | A | 1 |
| 75143050 | 3000_Vegetables | Lettuce, salad with assorted vegetables excluding tomatoes and carrots, no dressing       | 100 | 4.5 | A | 1 |
| 75143100 | 3000_Vegetables | Lettuce, salad with avocado, tomato, and/or carrots, with or without other vegetables, no | 100 | 5   | A | 3 |
| 75202010 | 3000_Vegetables | Asparagus, cooked, NS as to form, fat not added in cooking                                | 100 | 4.5 | A | 3 |
| 75202011 | 3000_Vegetables | Asparagus, cooked, from fresh, fat not added in cooking                                   | 100 | 4.5 | A | 3 |
| 75202012 | 3000_Vegetables | Asparagus, cooked, from frozen, fat not added in cooking                                  | 100 | 4.5 | A | 3 |
| 75202013 | 3000_Vegetables | Asparagus, cooked, from canned, fat not added in cooking                                  | 100 | 4   | A | 3 |
| 75202024 | 3000_Vegetables | Asparagus, cooked, NS as to form, made with oil                                           | 100 | 4.5 | A | 4 |
| 75202026 | 3000_Vegetables | Asparagus, cooked, NS as to form, made with margarine                                     | 100 | 4.5 | A | 4 |
| 75202027 | 3000_Vegetables | Asparagus, cooked, from fresh, made with oil                                              | 100 | 4.5 | A | 4 |
| 75202029 | 3000_Vegetables | Asparagus, cooked, from fresh, made with margarine                                        | 100 | 4.5 | A | 4 |
| 75202031 | 3000_Vegetables | Asparagus, cooked, from frozen, made with oil                                             | 100 | 4.5 | A | 4 |
| 75202033 | 3000_Vegetables | Asparagus, cooked, from frozen, made with margarine                                       | 100 | 4.5 | A | 4 |
| 75202034 | 3000_Vegetables | Asparagus, cooked, from canned, made with oil                                             | 100 | 4   | B | 4 |
| 75203000 | 3000_Vegetables | Bamboo shoots, cooked, fat not added in cooking                                           | 100 | 4.5 | A | 3 |
| 75204990 | 3000_Vegetables | Beans, string, cooked, NS as to form, NS as to color, fat not added in cooking            | 100 | 4.5 | A | 3 |
| 75204993 | 3000_Vegetables | Beans, string, cooked, from canned, NS as to color, fat not added in cooking              | 100 | 4   | A | 3 |
| 75205020 | 3000_Vegetables | Beans, string, green, cooked, NS as to form, fat not added in cooking                     | 100 | 4.5 | A | 3 |
| 75205023 | 3000_Vegetables | Beans, string, green, cooked, from canned, fat not added in cooking                       | 100 | 4   | A | 3 |
| 75205120 | 3000_Vegetables | Beans, string, green, canned, low sodium, fat not added in cooking                        | 100 | 4.5 | A | 3 |
| 75205131 | 3000_Vegetables | Beans, string, green, canned, low sodium, made with oil                                   | 100 | 4.5 | A | 3 |
| 75205133 | 3000_Vegetables | Beans, string, green, canned, low sodium, made with margarine                             | 100 | 4.5 | A | 3 |
| 75206011 | 3000_Vegetables | Beans, string, yellow, cooked, from fresh, fat not added in cooking                       | 100 | 4.5 | A | 3 |
| 75208300 | 3000_Vegetables | Bitter melon, cooked, fat not added in cooking                                            | 100 | 4.5 | A | 3 |
| 75208710 | 3000_Vegetables | Broccoli, cooked, fat not added in cooking                                                | 100 | 4.5 | A | 3 |
| 75209010 | 3000_Vegetables | Brussels sprouts, cooked, NS as to form, fat not added in cooking                         | 100 | 5   | A | 3 |
| 75209011 | 3000_Vegetables | Brussels sprouts, cooked, from fresh, fat not added in cooking                            | 100 | 4.5 | A | 3 |
| 75209012 | 3000_Vegetables | Brussels sprouts, cooked, from frozen, fat not added in cooking                           | 100 | 5   | A | 3 |
| 75210000 | 3000_Vegetables | Cabbage, Chinese, cooked, NS as to fat added in cooking                                   | 100 | 4.5 | B | 4 |
| 75210010 | 3000_Vegetables | Cabbage, Chinese, cooked, fat not added in cooking                                        | 100 | 4.5 | A | 3 |
| 75210020 | 3000_Vegetables | Cabbage, Chinese, cooked, fat added in cooking, NS as to type of fat                      | 100 | 4.5 | B | 4 |
| 75210021 | 3000_Vegetables | Cabbage, Chinese, cooked, made with oil                                                   | 100 | 4.5 | B | 4 |
| 75210023 | 3000_Vegetables | Cabbage, Chinese, cooked, made with margarine                                             | 100 | 4   | B | 4 |
| 75211020 | 3000_Vegetables | Cabbage, green, cooked, fat not added in cooking                                          | 100 | 4.5 | A | 3 |
| 75212010 | 3000_Vegetables | Cabbage, red, cooked, fat not added in cooking                                            | 100 | 4.5 | A | 3 |
| 75213010 | 3000_Vegetables | Cabbage, savoy, cooked, fat not added in cooking                                          | 100 | 4.5 | A | 3 |
| 75213021 | 3000_Vegetables | Cabbage, savoy, cooked, made with oil                                                     | 100 | 4.5 | A | 3 |
| 75213110 | 3000_Vegetables | Cactus, cooked, fat not added in cooking                                                  | 100 | 4.5 | A | 3 |
| 75214010 | 3000_Vegetables | Cauliflower, cooked, NS as to form, fat not added in cooking                              | 100 | 4.5 | A | 3 |
| 75214011 | 3000_Vegetables | Cauliflower, cooked, from fresh, fat not added in cooking                                 | 100 | 4.5 | A | 3 |
| 75214012 | 3000_Vegetables | Cauliflower, cooked, from frozen, fat not added in cooking                                | 100 | 4.5 | A | 3 |
| 75214013 | 3000_Vegetables | Cauliflower, cooked, from canned, fat not added in cooking                                | 100 | 4.5 | A | 3 |
| 75214024 | 3000_Vegetables | Cauliflower, cooked, NS as to form, made with oil                                         | 100 | 4.5 | A | 3 |
| 75214030 | 3000_Vegetables | Cauliflower, cooked, from frozen, made with oil                                           | 100 | 4.5 | A | 3 |
| 75214033 | 3000_Vegetables | Cauliflower, cooked, from canned, made with oil                                           | 100 | 4.5 | A | 3 |
| 75215010 | 3000_Vegetables | Celery, cooked, fat not added in cooking                                                  | 100 | 4   | A | 3 |
| 75215110 | 3000_Vegetables | Fennel bulb, cooked, fat not added in cooking                                             | 100 | 4.5 | A | 3 |
| 75217300 | 3000_Vegetables | Flowers or blossoms of sesbania, squash, or lily, fat not added in cooking                | 100 | 4   | A | 3 |
| 75219010 | 3000_Vegetables | Mushrooms, cooked, NS as to form, fat not added in cooking                                | 100 | 4.5 | A | 3 |



Supplementary Table 8. Original (uncorrected) scores for all food items.

|          |                 |                                                                                            |     |     |   |   |
|----------|-----------------|--------------------------------------------------------------------------------------------|-----|-----|---|---|
| 75219011 | 3000_Vegetables | Mushrooms, cooked, from fresh, fat not added in cooking                                    | 100 | 4.5 | A | 3 |
| 75219012 | 3000_Vegetables | Mushrooms, cooked, from frozen, fat not added in cooking                                   | 100 | 4.5 | A | 3 |
| 75220010 | 3000_Vegetables | Okra, cooked, NS as to form, fat not added in cooking                                      | 100 | 4.5 | A | 3 |
| 75220011 | 3000_Vegetables | Okra, cooked, from fresh, fat not added in cooking                                         | 100 | 4.5 | A | 3 |
| 75220012 | 3000_Vegetables | Okra, cooked, from frozen, fat not added in cooking                                        | 100 | 4.5 | A | 3 |
| 75220013 | 3000_Vegetables | Okra, cooked, from canned, fat not added in cooking                                        | 100 | 4.5 | A | 3 |
| 75220024 | 3000_Vegetables | Okra, cooked, NS as to form, made with oil                                                 | 100 | 4.5 | B | 3 |
| 75220027 | 3000_Vegetables | Okra, cooked, from fresh, made with oil                                                    | 100 | 4.5 | A | 3 |
| 75220031 | 3000_Vegetables | Okra, cooked, from frozen, made with oil                                                   | 100 | 4.5 | B | 3 |
| 75220034 | 3000_Vegetables | Okra, cooked, from canned, made with oil                                                   | 100 | 4.5 | A | 3 |
| 75220050 | 3000_Vegetables | Lettuce, cooked, fat not added in cooking                                                  | 100 | 4.5 | A | 3 |
| 75220099 | 3000_Vegetables | Luffa, cooked, NS as to fat added in cooking                                               | 100 | 4.5 | A | 3 |
| 75220100 | 3000_Vegetables | Luffa, cooked, fat not added in cooking                                                    | 100 | 4.5 | A | 3 |
| 75220101 | 3000_Vegetables | Luffa, cooked, fat added in cooking                                                        | 100 | 4.5 | A | 3 |
| 75221050 | 3000_Vegetables | Onions, green, cooked, NS as to form, fat not added in cooking                             | 100 | 4.5 | A | 3 |
| 75227100 | 3000_Vegetables | Radish, daikon, cooked, fat not added in cooking                                           | 100 | 4   | A | 3 |
| 75230010 | 3000_Vegetables | Sauerkraut, cooked, fat not added in cooking                                               | 100 | 4   | A | 3 |
| 75232100 | 3000_Vegetables | Seaweed, cooked, NS as to fat added in cooking                                             | 100 | 4.5 | A | 4 |
| 75232110 | 3000_Vegetables | Seaweed, cooked, fat not added in cooking                                                  | 100 | 4.5 | A | 3 |
| 75232120 | 3000_Vegetables | Seaweed, cooked, fat added in cooking, NS as to type of fat                                | 100 | 4.5 | A | 4 |
| 75232121 | 3000_Vegetables | Seaweed, cooked, made with oil                                                             | 100 | 4.5 | A | 4 |
| 75232123 | 3000_Vegetables | Seaweed, cooked, made with margarine                                                       | 100 | 4.5 | A | 4 |
| 75233010 | 3000_Vegetables | Squash, summer, yellow or green, cooked, NS as to form, fat not added in cooking           | 100 | 4.5 | A | 3 |
| 75233011 | 3000_Vegetables | Squash, summer, yellow or green, cooked, from fresh, fat not added in cooking              | 100 | 4.5 | A | 3 |
| 75233012 | 3000_Vegetables | Squash, summer, yellow or green, cooked, from frozen, fat not added in cooking             | 100 | 4.5 | A | 3 |
| 75233013 | 3000_Vegetables | Squash, summer, yellow or green, cooked, from canned, fat not added in cooking             | 100 | 4.5 | A | 3 |
| 75235750 | 3000_Vegetables | Winter melon, cooked                                                                       | 100 | 4   | A | 3 |
| 75302010 | 3000_Vegetables | Beans, string, green, with tomatoes, cooked, fat not added in cooking                      | 100 | 4.5 | A | 3 |
| 75311110 | 3000_Vegetables | Mixed vegetables, canned, low sodium, fat not added in cooking                             | 100 | 5   | A | 3 |
| 75311121 | 3000_Vegetables | Mixed vegetables, canned, low sodium, made with oil                                        | 100 | 5   | A | 3 |
| 75311123 | 3000_Vegetables | Mixed vegetables, canned, low sodium, made with margarine                                  | 100 | 5   | A | 3 |
| 75316030 | 3000_Vegetables | Squash, summer, yellow or green, with tomato sauce, cooked, fat not added in cooking       | 100 | 4.5 | A | 3 |
| 75330110 | 3000_Vegetables | Vegetable combination, including carrots, broccoli, and/or dark-green leafy; cooked, no sa | 100 | 4.5 | A | 3 |
| 75330121 | 3000_Vegetables | Vegetable combination, including carrots, broccoli, and/or dark-green leafy; cooked, no sa | 100 | 4.5 | B | 3 |
| 75500110 | 3000_Vegetables | Beans, string, green, pickled                                                              | 100 | 4.5 | A | 3 |
| 75500510 | 3000_Vegetables | Celery, pickled                                                                            | 100 | 4.5 | A | 3 |
| 75502500 | 3000_Vegetables | Cabbage, fresh, pickled, Japanese style                                                    | 100 | 4.5 | A | 3 |
| 75502520 | 3000_Vegetables | Kimchi                                                                                     | 100 | 4   | A | 3 |
| 75503010 | 3000_Vegetables | Cucumber pickles, dill                                                                     | 100 | 3.5 | B | 3 |
| 75505000 | 3000_Vegetables | Mushrooms, pickled                                                                         | 100 | 4.5 | A | 3 |
| 75507000 | 3000_Vegetables | Okra, pickled                                                                              | 100 | 4.5 | A | 3 |
| 75511040 | 3000_Vegetables | Pepper, hot, pickled                                                                       | 100 | 3   | B | 3 |
| 75511100 | 3000_Vegetables | Pickles, NS as to vegetable                                                                | 100 | 3.5 | B | 3 |
| 75515100 | 3000_Vegetables | Vegetables, pickled                                                                        | 100 | 4.5 | A | 3 |
| 75206013 | 3000_Vegetables | Beans, string, yellow, cooked, from canned, fat not added in cooking                       | 100 | 4   | A | 3 |
| 75219030 | 3000_Vegetables | Mushrooms, cooked, NS as to form, made with oil                                            | 100 | 4.5 | A | 4 |
| 75219033 | 3000_Vegetables | Mushrooms, cooked, from fresh, made with oil                                               | 100 | 4.5 | A | 4 |
| 75219036 | 3000_Vegetables | Mushrooms, cooked, from frozen, made with oil                                              | 100 | 4.5 | A | 4 |
| 75202036 | 3000_Vegetables | Asparagus, cooked, from canned, made with margarine                                        | 99  | 4   | B | 4 |
| 75206012 | 3000_Vegetables | Beans, string, yellow, cooked, from frozen, fat not added in cooking                       | 99  | 4.5 | A | 3 |
| 75234010 | 3000_Vegetables | Turnip, cooked, NS as to form, fat not added in cooking                                    | 99  | 4.5 | A | 3 |
| 75234012 | 3000_Vegetables | Turnip, cooked, from frozen, fat not added in cooking                                      | 99  | 4.5 | A | 3 |
| 75204992 | 3000_Vegetables | Beans, string, cooked, from frozen, NS as to color, fat not added in cooking               | 99  | 4.5 | A | 3 |
| 75205022 | 3000_Vegetables | Beans, string, green, cooked, from frozen, fat not added in cooking                        | 99  | 4.5 | A | 3 |
| 72203080 | 3000_Vegetables | Broccoli, chinese, cooked, NS as to form, made with oil                                    | 99  | 4   | B | 4 |
| 72203120 | 3000_Vegetables | Broccoli, chinese, cooked, from fresh, made with oil                                       | 99  | 4   | B | 4 |
| 72203160 | 3000_Vegetables | Broccoli, chinese, cooked, from frozen, made with oil                                      | 99  | 4   | B | 4 |
| 75233024 | 3000_Vegetables | Squash, summer, yellow or green, cooked, NS as to form, made with oil                      | 99  | 4.5 | B | 3 |
| 75302040 | 3000_Vegetables | Beans, string, green, with almonds, cooked, fat not added in cooking                       | 99  | 4.5 | A | 3 |
| 75208730 | 3000_Vegetables | Broccoli, cooked, made with oil                                                            | 99  | 4.5 | A | 4 |
| 72121209 | 3000_Vegetables | Mustard Cabbage, cooked, NS as to fat added in cooking                                     | 99  | 4   | B | 4 |
| 72121211 | 3000_Vegetables | Mustard Cabbage, cooked, fat added in cooking                                              | 99  | 4   | B | 4 |
| 75502550 | 3000_Vegetables | Cabbage, mustard, salted                                                                   | 99  | 4   | A | 3 |
| 72125200 | 3000_Vegetables | Spinach, cooked, NS as to form, NS as to fat added in cooking                              | 98  | 4.5 | A | 4 |
| 72125220 | 3000_Vegetables | Spinach, cooked, NS as to form, fat added in cooking, NS as to type of fat                 | 98  | 4.5 | A | 4 |
| 72119235 | 3000_Vegetables | Kale, cooked, from canned, made with margarine                                             | 98  | 4.5 | A | 4 |
| 72125202 | 3000_Vegetables | Spinach, cooked, from frozen, NS as to fat added in cooking                                | 98  | 4.5 | A | 4 |
| 72125222 | 3000_Vegetables | Spinach, cooked, from frozen, fat added in cooking, NS as to type of fat                   | 98  | 4.5 | A | 4 |
| 75117020 | 3000_Vegetables | Onions, mature, raw                                                                        | 98  | 4.5 | A | 1 |
| 72107235 | 3000_Vegetables | Collards, cooked, from canned, made with margarine                                         | 98  | 4.5 | A | 4 |
| 75206033 | 3000_Vegetables | Beans, string, yellow, cooked, from fresh, made with oil                                   | 98  | 4.5 | A | 3 |
| 75221051 | 3000_Vegetables | Onions, green, cooked, from fresh, fat not added in cooking                                | 97  | 4.5 | A | 3 |
| 72101200 | 3000_Vegetables | Beet greens, cooked, NS as to fat added in cooking                                         | 97  | 4   | B | 4 |
| 72101220 | 3000_Vegetables | Beet greens, cooked, fat added in cooking, NS as to type of fat                            | 97  | 4   | B | 4 |
| 72125218 | 3000_Vegetables | Spinach, cooked, from fresh, made with butter                                              | 97  | 4.5 | A | 4 |
| 75203028 | 3000_Vegetables | Bamboo shoots, cooked, NS as to fat added in cooking                                       | 97  | 4.5 | A | 4 |
| 75213123 | 3000_Vegetables | Cactus, cooked, made with margarine                                                        | 97  | 4   | A | 4 |
| 75219013 | 3000_Vegetables | Mushrooms, cooked, from canned, fat not added in cooking                                   | 97  | 4   | B | 3 |
| 72125228 | 3000_Vegetables | Spinach, cooked, from canned, made with butter                                             | 97  | 4   | B | 4 |
| 75534500 | 3000_Vegetables | Tsukemono, Japanese pickles                                                                | 97  | 4   | B | 3 |
| 73102213 | 3000_Vegetables | Carrots, cooked, from canned, fat not added in cooking                                     | 97  | 4   | A | 3 |
| 75214026 | 3000_Vegetables | Cauliflower, cooked, NS as to form, made with margarine                                    | 97  | 4.5 | A | 4 |
| 75214032 | 3000_Vegetables | Cauliflower, cooked, from frozen, made with margarine                                      | 97  | 4.5 | A | 4 |
| 75220029 | 3000_Vegetables | Okra, cooked, from fresh, made with margarine                                              | 96  | 4.5 | A | 4 |
| 72125215 | 3000_Vegetables | Spinach, cooked, NS as to form, made with butter                                           | 96  | 4.5 | A | 4 |
| 75316000 | 3000_Vegetables | Squash, summer, yellow or green, and onions, cooked, fat not added in cooking              | 96  | 4.5 | B | 3 |

Supplementary Table 8. Original (uncorrected) scores for all food items.

|          |                 |                                                                                            |    |     |   |   |
|----------|-----------------|--------------------------------------------------------------------------------------------|----|-----|---|---|
| 75233030 | 3000_Vegetables | Squash, summer, yellow or green, cooked, from frozen, made with oil                        | 96 | 4.5 | B | 3 |
| 72130201 | 3000_Vegetables | Watercress, cooked, fat added in cooking                                                   | 96 | 3.5 | D | 4 |
| 72201225 | 3000_Vegetables | Broccoli, cooked, from fresh, made with margarine                                          | 96 | 4.5 | A | 4 |
| 75209040 | 3000_Vegetables | Brussels sprouts, cooked, from fresh, made with oil                                        | 96 | 4.5 | A | 4 |
| 72128224 | 3000_Vegetables | Turnip greens, cooked, NS as to form, made with oil                                        | 96 | 4.5 | A | 4 |
| 74504023 | 3000_Vegetables | Tomato and okra, cooked, made with margarine                                               | 96 | 4.5 | B | 4 |
| 73103023 | 3000_Vegetables | Carrots, canned, low sodium, made with margarine                                           | 96 | 4.5 | A | 4 |
| 75231011 | 3000_Vegetables | Snowpea, cooked, from fresh, fat not added in cooking                                      | 96 | 4.5 | A | 3 |
| 75220036 | 3000_Vegetables | Okra, cooked, from canned, made with margarine                                             | 96 | 4.5 | A | 4 |
| 72104200 | 3000_Vegetables | Chard, cooked, NS as to fat added in cooking                                               | 95 | 4.5 | B | 4 |
| 72104220 | 3000_Vegetables | Chard, cooked, fat added in cooking, NS as to type of fat                                  | 95 | 4.5 | B | 4 |
| 75204991 | 3000_Vegetables | Beans, string, cooked, from fresh, NS as to color, fat not added in cooking                | 95 | 4.5 | A | 3 |
| 75205021 | 3000_Vegetables | Beans, string, green, cooked, from fresh, fat not added in cooking                         | 95 | 4.5 | A | 3 |
| 72125225 | 3000_Vegetables | Spinach, cooked, from frozen, made with butter                                             | 95 | 4.5 | A | 4 |
| 75224120 | 3000_Vegetables | Peas, green, canned, low sodium, fat not added in cooking                                  | 95 | 5   | A | 1 |
| 75224131 | 3000_Vegetables | Peas, green, canned, low sodium, made with oil                                             | 94 | 5   | A | 1 |
| 75102500 | 3000_Vegetables | Beets, raw                                                                                 | 94 | 4.5 | A | 1 |
| 73201013 | 3000_Vegetables | Pumpkin, cooked, from canned, fat not added in cooking                                     | 94 | 4.5 | A | 3 |
| 72201215 | 3000_Vegetables | Broccoli, cooked, NS as to form, made with margarine                                       | 94 | 4.5 | A | 4 |
| 72201228 | 3000_Vegetables | Broccoli, cooked, from frozen, made with margarine                                         | 94 | 4.5 | A | 4 |
| 75209030 | 3000_Vegetables | Brussels sprouts, cooked, NS as to form, made with oil                                     | 94 | 5   | A | 4 |
| 75209050 | 3000_Vegetables | Brussels sprouts, cooked, from frozen, made with oil                                       | 94 | 5   | A | 4 |
| 73303021 | 3000_Vegetables | Squash, winter type, baked, no sugar added in cooking, made with oil                       | 94 | 4.5 | A | 3 |
| 75213121 | 3000_Vegetables | Cactus, cooked, made with oil                                                              | 94 | 4.5 | A | 4 |
| 75208750 | 3000_Vegetables | Broccoli, cooked, made with margarine                                                      | 94 | 4.5 | A | 4 |
| 75208111 | 3000_Vegetables | Beets, canned, low sodium, made with oil                                                   | 94 | 4.5 | A | 3 |
| 75203020 | 3000_Vegetables | Bamboo shoots, cooked, fat added in cooking                                                | 93 | 4.5 | A | 4 |
| 75219032 | 3000_Vegetables | Mushrooms, cooked, NS as to form, made with margarine                                      | 93 | 4.5 | A | 4 |
| 75219035 | 3000_Vegetables | Mushrooms, cooked, from fresh, made with margarine                                         | 93 | 4.5 | A | 4 |
| 75219038 | 3000_Vegetables | Mushrooms, cooked, from frozen, made with margarine                                        | 93 | 4.5 | A | 4 |
| 74504110 | 3000_Vegetables | Tomato and onion, cooked, fat not added in cooking                                         | 93 | 4.5 | A | 3 |
| 75201031 | 3000_Vegetables | Artichoke, cooked, NS as to form, made with oil                                            | 93 | 4.5 | A | 3 |
| 75201037 | 3000_Vegetables | Artichoke, cooked, from canned, made with oil                                              | 93 | 4.5 | A | 3 |
| 75201040 | 3000_Vegetables | Artichoke, cooked, from frozen, made with oil                                              | 93 | 4.5 | A | 3 |
| 75302060 | 3000_Vegetables | Beans, string, green, with pinto beans, cooked, fat not added in cooking                   | 93 | 5   | A | 3 |
| 72103010 | 3000_Vegetables | Broccoli raab, cooked, NS as to fat added in cooking                                       | 93 | 4.5 | A | 4 |
| 72103030 | 3000_Vegetables | Broccoli raab, cooked, fat added in cooking, NS as to type of fat                          | 93 | 4.5 | A | 4 |
| 73301010 | 3000_Vegetables | Squash, winter type, mashed, no fat or sugar added in cooking                              | 93 | 4.5 | A | 3 |
| 75201034 | 3000_Vegetables | Artichoke, cooked, from fresh, made with oil                                               | 93 | 5   | A | 3 |
| 73303010 | 3000_Vegetables | Squash, winter type, baked, no fat or sugar added in cooking                               | 92 | 4.5 | A | 3 |
| 75204960 | 3000_Vegetables | Beans, string, cooked, NS as to form, NS as to color, made with oil                        | 92 | 4.5 | A | 3 |
| 75205041 | 3000_Vegetables | Beans, string, green, cooked, NS as to form, made with oil                                 | 92 | 4.5 | A | 3 |
| 72125999 | 3000_Vegetables | Taro leaves, cooked, NS as to fat added in cooking                                         | 92 | 5   | A | 4 |
| 72126001 | 3000_Vegetables | Taro leaves, cooked, fat added in cooking                                                  | 92 | 5   | A | 4 |
| 75206030 | 3000_Vegetables | Beans, string, yellow, cooked, NS as to form, made with oil                                | 92 | 4.5 | A | 3 |
| 75226010 | 3000_Vegetables | Peppers, green, cooked, fat not added in cooking                                           | 92 | 4   | A | 3 |
| 75302030 | 3000_Vegetables | Beans, string, green, with chickpeas, cooked, fat not added in cooking                     | 91 | 5   | A | 3 |
| 75311030 | 3000_Vegetables | Mixed vegetables, cooked, from canned, made with oil                                       | 91 | 4.5 | A | 3 |
| 75226050 | 3000_Vegetables | Peppers, red, cooked, fat not added in cooking                                             | 91 | 4   | A | 3 |
| 72101240 | 3000_Vegetables | Beet greens, cooked, made with butter                                                      | 91 | 4   | B | 4 |
| 75143300 | 3000_Vegetables | Lettuce, salad with egg, tomato, and/or carrots, with or without other vegetables, no dres | 91 | 5   | A | 4 |
| 72104240 | 3000_Vegetables | Chard, cooked, made with butter                                                            | 91 | 4   | B | 4 |
| 75204963 | 3000_Vegetables | Beans, string, cooked, from fresh, NS as to color, made with oil                           | 91 | 4.5 | A | 3 |
| 75205044 | 3000_Vegetables | Beans, string, green, cooked, from fresh, made with oil                                    | 91 | 4.5 | A | 3 |
| 73102212 | 3000_Vegetables | Carrots, cooked, from frozen, fat not added in cooking                                     | 91 | 4.5 | A | 3 |
| 75204966 | 3000_Vegetables | Beans, string, cooked, from frozen, NS as to color, made with oil                          | 91 | 4.5 | A | 3 |
| 75205047 | 3000_Vegetables | Beans, string, green, cooked, from frozen, made with oil                                   | 91 | 4.5 | A | 3 |
| 75218010 | 3000_Vegetables | Kohlrabi, cooked, fat not added in cooking                                                 | 91 | 4.5 | A | 3 |
| 75340010 | 3000_Vegetables | Vegetable combinations, Asian style, broccoli, green pepper, water chestnut, etc., cooked  | 91 | 4.5 | A | 3 |
| 73102210 | 3000_Vegetables | Carrots, cooked, NS as to form, fat not added in cooking                                   | 91 | 4.5 | A | 3 |
| 75206036 | 3000_Vegetables | Beans, string, yellow, cooked, from frozen, made with oil                                  | 91 | 4.5 | A | 3 |
| 75233027 | 3000_Vegetables | Squash, summer, yellow or green, cooked, from fresh, made with oil                         | 91 | 4.5 | B | 4 |
| 75209042 | 3000_Vegetables | Brussels sprouts, cooked, from fresh, made with margarine                                  | 91 | 4.5 | A | 4 |
| 73201024 | 3000_Vegetables | Pumpkin, cooked, NS as to form, made with oil                                              | 91 | 4.5 | B | 4 |
| 73201027 | 3000_Vegetables | Pumpkin, cooked, from fresh, made with oil                                                 | 91 | 4.5 | B | 4 |
| 73201030 | 3000_Vegetables | Pumpkin, cooked, from frozen, made with oil                                                | 91 | 4.5 | B | 4 |
| 75208110 | 3000_Vegetables | Beets, canned, low sodium, fat not added in cooking                                        | 91 | 4.5 | A | 1 |
| 75214035 | 3000_Vegetables | Cauliflower, cooked, from canned, made with margarine                                      | 90 | 4.5 | A | 4 |
| 72128225 | 3000_Vegetables | Turnip greens, cooked, NS as to form, made with butter                                     | 90 | 4.5 | A | 4 |
| 75214027 | 3000_Vegetables | Cauliflower, cooked, from fresh, made with oil                                             | 90 | 4.5 | A | 4 |
| 75215030 | 3000_Vegetables | Celery, cooked, made with oil                                                              | 90 | 4   | B | 4 |
| 72118200 | 3000_Vegetables | Greens, cooked, NS as to form, NS as to fat added in cooking                               | 90 | 4.5 | A | 4 |
| 72118201 | 3000_Vegetables | Greens, cooked, from fresh, NS as to fat added in cooking                                  | 90 | 4.5 | A | 4 |
| 72118220 | 3000_Vegetables | Greens, cooked, NS as to form, fat added in cooking, NS as to type of fat                  | 90 | 4.5 | A | 4 |
| 72118221 | 3000_Vegetables | Greens, cooked, from fresh, fat added in cooking, NS as to type of fat                     | 90 | 4.5 | A | 4 |
| 75234011 | 3000_Vegetables | Turnip, cooked, from fresh, fat not added in cooking                                       | 90 | 4.5 | A | 3 |
| 75234013 | 3000_Vegetables | Turnip, cooked, from canned, fat not added in cooking                                      | 90 | 4.5 | A | 3 |
| 75213023 | 3000_Vegetables | Cabbage, savoy, cooked, made with margarine                                                | 90 | 4.5 | A | 4 |
| 75216710 | 3000_Vegetables | Cucumber, cooked, fat not added in cooking                                                 | 90 | 4   | A | 3 |
| 75302048 | 3000_Vegetables | Beans, string, green, with almonds, cooked, made with margarine                            | 90 | 4.5 | A | 4 |
| 73102211 | 3000_Vegetables | Carrots, cooked, from fresh, fat not added in cooking                                      | 90 | 4.5 | A | 3 |
| 72128202 | 3000_Vegetables | Turnip greens, cooked, from frozen, NS as to fat added in cooking                          | 90 | 4.5 | A | 4 |
| 72128222 | 3000_Vegetables | Turnip greens, cooked, from frozen, fat added in cooking, NS as to type of fat             | 90 | 4.5 | A | 4 |
| 75340021 | 3000_Vegetables | Vegetable combinations, Asian style, broccoli, green pepper, water chestnut, etc., cooked  | 90 | 4.5 | A | 4 |
| 75215050 | 3000_Vegetables | Celery, cooked, made with margarine                                                        | 90 | 4   | B | 4 |
| 75233029 | 3000_Vegetables | Squash, summer, yellow or green, cooked, from fresh, made with margarine                   | 90 | 4.5 | B | 4 |

Supplementary Table 8. Original (uncorrected) scores for all food items.

|          |                 |                                                                                            |    |     |   |   |
|----------|-----------------|--------------------------------------------------------------------------------------------|----|-----|---|---|
| 75233035 | 3000_Vegetables | Squash, summer, yellow or green, cooked, from canned, made with margarine                  | 89 | 4.5 | A | 4 |
| 75208290 | 3000_Vegetables | Bitter melon, cooked, NS as to fat added in cooking                                        | 89 | 4   | B | 4 |
| 75208310 | 3000_Vegetables | Bitter melon, cooked, fat added in cooking                                                 | 89 | 4   | B | 4 |
| 72128231 | 3000_Vegetables | Turnip greens, cooked, from frozen, made with butter                                       | 89 | 4.5 | A | 4 |
| 72128200 | 3000_Vegetables | Turnip greens, cooked, NS as to form, NS as to fat added in cooking                        | 89 | 4.5 | A | 4 |
| 72128220 | 3000_Vegetables | Turnip greens, cooked, NS as to form, fat added in cooking, NS as to type of fat           | 89 | 4.5 | A | 4 |
| 75206039 | 3000_Vegetables | Beans, string, yellow, cooked, from canned, made with oil                                  | 89 | 4   | B | 3 |
| 75231012 | 3000_Vegetables | Snowpea, cooked, from frozen, fat not added in cooking                                     | 89 | 5   | A | 3 |
| 72118223 | 3000_Vegetables | Greens, cooked, from canned, fat added in cooking, NS as to type of fat                    | 89 | 4.5 | A | 4 |
| 75212021 | 3000_Vegetables | Cabbage, red, cooked, made with oil                                                        | 89 | 4.5 | B | 4 |
| 75211031 | 3000_Vegetables | Cabbage, green, cooked, made with oil                                                      | 89 | 4.5 | A | 4 |
| 72118203 | 3000_Vegetables | Greens, cooked, from canned, NS as to fat added in cooking                                 | 89 | 4.5 | A | 4 |
| 75231010 | 3000_Vegetables | Snowpea, cooked, NS as to form, fat not added in cooking                                   | 89 | 5   | A | 3 |
| 72122202 | 3000_Vegetables | Mustard greens, cooked, from frozen, NS as to fat added in cooking                         | 89 | 4.5 | A | 4 |
| 72122220 | 3000_Vegetables | Mustard greens, cooked, NS as to form, fat added in cooking, NS as to type of fat          | 89 | 4.5 | A | 4 |
| 72122222 | 3000_Vegetables | Mustard greens, cooked, from frozen, fat added in cooking, NS as to type of fat            | 89 | 4.5 | A | 4 |
| 75503110 | 3000_Vegetables | Cucumber pickles, dill, reduced salt                                                       | 89 | 4.5 | A | 4 |
| 75330123 | 3000_Vegetables | Vegetable combination, including carrots, broccoli, and/or dark-green leafy; cooked, no sa | 89 | 4.5 | A | 4 |
| 72128201 | 3000_Vegetables | Turnip greens, cooked, from fresh, NS as to fat added in cooking                           | 88 | 4.5 | A | 4 |
| 72128221 | 3000_Vegetables | Turnip greens, cooked, from fresh, fat added in cooking, NS as to type of fat              | 88 | 4.5 | A | 4 |
| 75231026 | 3000_Vegetables | Snowpea, cooked, from fresh, made with oil                                                 | 88 | 4.5 | A | 4 |
| 75228010 | 3000_Vegetables | Rutabaga, cooked, fat not added in cooking                                                 | 88 | 4.5 | A | 3 |
| 72118202 | 3000_Vegetables | Greens, cooked, from frozen, NS as to fat added in cooking                                 | 88 | 4.5 | B | 4 |
| 72118222 | 3000_Vegetables | Greens, cooked, from frozen, fat added in cooking, NS as to type of fat                    | 88 | 4.5 | B | 4 |
| 72126999 | 3000_Vegetables | Thistle leaves, cooked, NS as to fat added in cooking                                      | 88 | 4   | B | 4 |
| 72127001 | 3000_Vegetables | Thistle leaves, cooked, fat added in cooking                                               | 88 | 4   | B | 4 |
| 75202000 | 3000_Vegetables | Asparagus, cooked, NS as to form, NS as to fat added in cooking                            | 88 | 4.5 | A | 4 |
| 75202020 | 3000_Vegetables | Asparagus, cooked, NS as to form, fat added in cooking, NS as to type of fat               | 88 | 4.5 | A | 4 |
| 75202022 | 3000_Vegetables | Asparagus, cooked, from frozen, fat added in cooking, NS as to type of fat                 | 88 | 4.5 | A | 4 |
| 74505010 | 3000_Vegetables | Tomato with corn and okra, cooked, fat not added in cooking                                | 88 | 4.5 | B | 3 |
| 75503030 | 3000_Vegetables | Cucumber pickles, sour                                                                     | 87 | 3   | C | 3 |
| 75201010 | 3000_Vegetables | Artichoke, cooked, NS as to form, fat not added in cooking                                 | 87 | 4.5 | A | 3 |
| 75201012 | 3000_Vegetables | Artichoke, cooked, from frozen, fat not added in cooking                                   | 87 | 4.5 | A | 3 |
| 75201013 | 3000_Vegetables | Artichoke, cooked, from canned, fat not added in cooking                                   | 87 | 4.5 | A | 3 |
| 75202003 | 3000_Vegetables | Asparagus, cooked, from canned, NS as to fat added in cooking                              | 87 | 4   | B | 4 |
| 75202023 | 3000_Vegetables | Asparagus, cooked, from canned, fat added in cooking, NS as to type of fat                 | 87 | 4   | B | 4 |
| 75302046 | 3000_Vegetables | Beans, string, green, with almonds, cooked, made with oil                                  | 87 | 4.5 | A | 4 |
| 75204969 | 3000_Vegetables | Beans, string, cooked, from canned, NS as to color, made with oil                          | 87 | 4   | B | 3 |
| 75205050 | 3000_Vegetables | Beans, string, green, cooked, from canned, made with oil                                   | 87 | 4   | B | 3 |
| 72128228 | 3000_Vegetables | Turnip greens, cooked, from fresh, made with butter                                        | 87 | 4.5 | A | 4 |
| 75209032 | 3000_Vegetables | Brussels sprouts, cooked, NS as to form, made with margarine                               | 87 | 5   | A | 4 |
| 75209052 | 3000_Vegetables | Brussels sprouts, cooked, from frozen, made with margarine                                 | 87 | 5   | A | 4 |
| 75220026 | 3000_Vegetables | Okra, cooked, NS as to form, made with margarine                                           | 87 | 4.5 | A | 4 |
| 75220033 | 3000_Vegetables | Okra, cooked, from frozen, made with margarine                                             | 87 | 4.5 | A | 4 |
| 72103050 | 3000_Vegetables | Broccoli raab, cooked, made with butter                                                    | 87 | 4.5 | A | 4 |
| 73201026 | 3000_Vegetables | Pumpkin, cooked, NS as to form, made with margarine                                        | 87 | 4.5 | A | 4 |
| 73201029 | 3000_Vegetables | Pumpkin, cooked, from fresh, made with margarine                                           | 87 | 4.5 | A | 4 |
| 73201032 | 3000_Vegetables | Pumpkin, cooked, from frozen, made with margarine                                          | 87 | 4.5 | A | 4 |
| 73201033 | 3000_Vegetables | Pumpkin, cooked, from canned, made with oil                                                | 87 | 4.5 | A | 4 |
| 75100750 | 3000_Vegetables | Artichoke, Jerusalem, raw                                                                  | 87 | 4.5 | A | 1 |
| 75202001 | 3000_Vegetables | Asparagus, cooked, from fresh, NS as to fat added in cooking                               | 87 | 4.5 | A | 4 |
| 75202021 | 3000_Vegetables | Asparagus, cooked, from fresh, fat added in cooking, NS as to type of fat                  | 87 | 4.5 | A | 4 |
| 75207010 | 3000_Vegetables | Bean sprouts, cooked, NS as to form, fat not added in cooking                              | 87 | 4   | B | 4 |
| 75207011 | 3000_Vegetables | Bean sprouts, cooked, from fresh, fat not added in cooking                                 | 87 | 4   | B | 4 |
| 75214029 | 3000_Vegetables | Cauliflower, cooked, from fresh, made with margarine                                       | 86 | 4.5 | A | 4 |
| 75340023 | 3000_Vegetables | Vegetable combinations, Asian style, broccoli, green pepper, water chestnut, etc., cooked  | 86 | 4.5 | A | 4 |
| 75215123 | 3000_Vegetables | Fennel bulb, cooked, made with margarine                                                   | 86 | 4.5 | A | 4 |
| 75227099 | 3000_Vegetables | Radish, daikon, cooked, NS as to fat added in cooking                                      | 86 | 4.5 | A | 4 |
| 75215121 | 3000_Vegetables | Fennel bulb, cooked, made with oil                                                         | 86 | 4.5 | B | 4 |
| 75215510 | 3000_Vegetables | Christophine, cooked, fat not added in cooking                                             | 86 | 4.5 | A | 3 |
| 75233033 | 3000_Vegetables | Squash, summer, yellow or green, cooked, from canned, made with oil                        | 86 | 4.5 | A | 4 |
| 75233026 | 3000_Vegetables | Squash, summer, yellow or green, cooked, NS as to form, made with margarine                | 86 | 4.5 | B | 4 |
| 72120200 | 3000_Vegetables | Lambquarter, cooked, NS as to fat added in cooking                                         | 86 | 4.5 | A | 4 |
| 72120220 | 3000_Vegetables | Lambquarter, cooked, fat added in cooking, NS as to type of fat                            | 86 | 4.5 | A | 4 |
| 75231001 | 3000_Vegetables | Snowpea, cooked, from fresh, NS as to fat added in cooking                                 | 85 | 4.5 | A | 4 |
| 75231021 | 3000_Vegetables | Snowpea, cooked, from fresh, fat added in cooking, NS as to type of fat                    | 85 | 4.5 | A | 4 |
| 75210022 | 3000_Vegetables | Cabbage, Chinese, cooked, made with butter                                                 | 85 | 4   | B | 4 |
| 75226061 | 3000_Vegetables | Peppers, red, cooked, made with oil                                                        | 85 | 4   | B | 4 |
| 75502510 | 3000_Vegetables | Cabbage, red, pickled                                                                      | 85 | 4.5 | A | 1 |
| 73111211 | 3000_Vegetables | Peas and carrots, cooked, from fresh, fat not added in cooking                             | 85 | 4.5 | A | 3 |
| 72107221 | 3000_Vegetables | Collards, cooked, from fresh, fat added in cooking, NS as to type of fat                   | 85 | 5   | A | 4 |
| 72107200 | 3000_Vegetables | Collards, cooked, NS as to form, NS as to fat added in cooking                             | 85 | 5   | A | 4 |
| 72107201 | 3000_Vegetables | Collards, cooked, from fresh, NS as to fat added in cooking                                | 85 | 5   | A | 4 |
| 72107220 | 3000_Vegetables | Collards, cooked, NS as to form, fat added in cooking, NS as to type of fat                | 85 | 5   | A | 4 |
| 75201011 | 3000_Vegetables | Artichoke, cooked, from fresh, fat not added in cooking                                    | 85 | 5   | A | 3 |
| 72203010 | 3000_Vegetables | Broccoli, chinese, cooked, NS as to form, NS as to fat added in cooking                    | 85 | 4   | B | 4 |
| 72203020 | 3000_Vegetables | Broccoli, chinese, cooked, from fresh, NS as to fat added in cooking                       | 85 | 4   | B | 4 |
| 72203030 | 3000_Vegetables | Broccoli, chinese, cooked, from frozen, NS as to fat added in cooking                      | 85 | 4   | B | 4 |
| 72203070 | 3000_Vegetables | Broccoli, chinese, cooked, NS as to form, fat added in cooking, NS as to type of fat       | 85 | 4   | B | 4 |
| 72203110 | 3000_Vegetables | Broccoli, chinese, cooked, from fresh, fat added in cooking, NS as to type of fat          | 85 | 4   | B | 4 |
| 72203150 | 3000_Vegetables | Broccoli, chinese, cooked, from frozen, fat added in cooking, NS as to type of fat         | 85 | 4   | B | 4 |
| 72123000 | 3000_Vegetables | Poke greens, cooked, NS as to fat added in cooking                                         | 85 | 4.5 | B | 4 |
| 72123020 | 3000_Vegetables | Poke greens, cooked, fat added in cooking, NS as to type of fat                            | 85 | 4.5 | B | 4 |
| 75211033 | 3000_Vegetables | Cabbage, green, cooked, made with margarine                                                | 84 | 4   | B | 4 |
| 73102227 | 3000_Vegetables | Carrots, cooked, from canned, made with oil                                                | 84 | 4   | B | 4 |
| 75515000 | 3000_Vegetables | Vegetables, pickled, Hawaiian style                                                        | 84 | 3.5 | C | 3 |

Supplementary Table 8. Original (uncorrected) scores for all food items.

|          |                 |                                                                                              |    |     |   |   |
|----------|-----------------|----------------------------------------------------------------------------------------------|----|-----|---|---|
| 75111800 | 3000_Vegetables | Jicama, raw                                                                                  | 84 | 5   | A | 1 |
| 75302211 | 3000_Vegetables | Beans, string, green, with onions, cooked, made with oil                                     | 84 | 4.5 | A | 3 |
| 75231023 | 3000_Vegetables | Snowpea, cooked, NS as to form, made with oil                                                | 84 | 5   | A | 4 |
| 75231029 | 3000_Vegetables | Snowpea, cooked, from frozen, made with oil                                                  | 84 | 5   | A | 4 |
| 72128400 | 3000_Vegetables | Turnip greens with roots, cooked, NS as to form, NS as to fat added in cooking               | 84 | 4.5 | A | 4 |
| 72128402 | 3000_Vegetables | Turnip greens with roots, cooked, from frozen, NS as to fat added in cooking                 | 84 | 4.5 | A | 4 |
| 72128420 | 3000_Vegetables | Turnip greens with roots, cooked, NS as to form, fat added in cooking                        | 84 | 4.5 | A | 4 |
| 72128422 | 3000_Vegetables | Turnip greens with roots, cooked, from frozen, fat added in cooking                          | 84 | 4.5 | A | 4 |
| 75340200 | 3000_Vegetables | Jai, Monk's Food                                                                             | 84 | 5   | A | 4 |
| 75206035 | 3000_Vegetables | Beans, string, yellow, cooked, from fresh, made with margarine                               | 84 | 4.5 | A | 4 |
| 72118225 | 3000_Vegetables | Greens, cooked, NS as to form, made with butter                                              | 83 | 4.5 | A | 4 |
| 72118228 | 3000_Vegetables | Greens, cooked, from fresh, made with butter                                                 | 83 | 4.5 | A | 4 |
| 72128203 | 3000_Vegetables | Turnip greens, cooked, from canned, NS as to fat added in cooking                            | 83 | 4   | B | 4 |
| 72128223 | 3000_Vegetables | Turnip greens, cooked, from canned, fat added in cooking, NS as to type of fat               | 83 | 4   | B | 4 |
| 75221061 | 3000_Vegetables | Onions, green, cooked, from fresh, fat added in cooking                                      | 83 | 4.5 | A | 4 |
| 75231028 | 3000_Vegetables | Snowpea, cooked, from fresh, made with margarine                                             | 83 | 4.5 | A | 4 |
| 72119200 | 3000_Vegetables | Kale, cooked, NS as to form, NS as to fat added in cooking                                   | 83 | 4   | B | 4 |
| 72119201 | 3000_Vegetables | Kale, cooked, from fresh, NS as to fat added in cooking                                      | 83 | 4   | B | 4 |
| 72119220 | 3000_Vegetables | Kale, cooked, NS as to form, fat added in cooking, NS as to type of fat                      | 83 | 4   | B | 4 |
| 72119221 | 3000_Vegetables | Kale, cooked, from fresh, fat added in cooking, NS as to type of fat                         | 83 | 4   | B | 4 |
| 72122200 | 3000_Vegetables | Mustard greens, cooked, NS as to form, NS as to fat added in cooking                         | 83 | 4   | B | 4 |
| 72122231 | 3000_Vegetables | Mustard greens, cooked, from frozen, made with butter                                        | 83 | 4.5 | A | 4 |
| 72132199 | 3000_Vegetables | Bitter melon leaves, horseradish leaves, jute leaves, or radish leaves, cooked, NS as to fat | 83 | 4   | C | 4 |
| 75219039 | 3000_Vegetables | Mushrooms, cooked, from canned, made with oil                                                | 83 | 4   | B | 4 |
| 72122201 | 3000_Vegetables | Mustard greens, cooked, from fresh, NS as to fat added in cooking                            | 83 | 4   | B | 4 |
| 72122221 | 3000_Vegetables | Mustard greens, cooked, from fresh, fat added in cooking, NS as to type of fat               | 83 | 4   | B | 4 |
| 72128401 | 3000_Vegetables | Turnip greens with roots, cooked, from fresh, NS as to fat added in cooking                  | 83 | 4   | B | 4 |
| 72128421 | 3000_Vegetables | Turnip greens with roots, cooked, from fresh, fat added in cooking                           | 83 | 4   | B | 4 |
| 72107202 | 3000_Vegetables | Collards, cooked, from frozen, NS as to fat added in cooking                                 | 83 | 4.5 | B | 4 |
| 72107222 | 3000_Vegetables | Collards, cooked, from frozen, fat added in cooking, NS as to type of fat                    | 83 | 4.5 | B | 4 |
| 75227110 | 3000_Vegetables | Radish, daikon, cooked, fat added in cooking                                                 | 83 | 4.5 | A | 4 |
| 72120240 | 3000_Vegetables | Lambsquartermade with butter                                                                 | 82 | 4.5 | B | 4 |
| 72118234 | 3000_Vegetables | Greens, cooked, from canned, made with butter                                                | 82 | 4.5 | A | 4 |
| 73201035 | 3000_Vegetables | Pumpkin, cooked, from canned, made with margarine                                            | 82 | 4.5 | A | 4 |
| 72110200 | 3000_Vegetables | Cress, cooked, NS as to form, NS as to fat added in cooking                                  | 82 | 4   | B | 4 |
| 72110201 | 3000_Vegetables | Cress, cooked, from fresh, NS as to fat added in cooking                                     | 82 | 4   | B | 4 |
| 72110203 | 3000_Vegetables | Cress, cooked, from canned, NS as to fat added in cooking                                    | 82 | 4   | B | 4 |
| 72110220 | 3000_Vegetables | Cress, cooked, NS as to form, fat added in cooking, NS as to type of fat                     | 82 | 4   | B | 4 |
| 72110221 | 3000_Vegetables | Cress, cooked, from fresh, fat added in cooking, NS as to type of fat                        | 82 | 4   | B | 4 |
| 72110223 | 3000_Vegetables | Cress, cooked, from canned, fat added in cooking, NS as to type of fat                       | 82 | 4   | B | 4 |
| 72122203 | 3000_Vegetables | Mustard greens, cooked, from canned, NS as to fat added in cooking                           | 82 | 4   | B | 4 |
| 72122223 | 3000_Vegetables | Mustard greens, cooked, from canned, fat added in cooking, NS as to type of fat              | 82 | 4   | B | 4 |
| 75302039 | 3000_Vegetables | Beans, string, green, with almonds, cooked, NS as to fat added in cooking                    | 82 | 4.5 | A | 4 |
| 75226021 | 3000_Vegetables | Peppers, green, cooked, made with oil                                                        | 82 | 4   | B | 4 |
| 75233032 | 3000_Vegetables | Squash, summer, yellow or green, cooked, from frozen, made with margarine                    | 82 | 4.5 | B | 4 |
| 72107225 | 3000_Vegetables | Collards, cooked, NS as to form, made with butter                                            | 82 | 4.5 | A | 4 |
| 72107228 | 3000_Vegetables | Collards, cooked, from fresh, made with butter                                               | 82 | 4.5 | A | 4 |
| 75340300 | 3000_Vegetables | Pinacbet                                                                                     | 82 | 4   | B | 4 |
| 72119202 | 3000_Vegetables | Kale, cooked, from frozen, NS as to fat added in cooking                                     | 82 | 4   | B | 4 |
| 72119222 | 3000_Vegetables | Kale, cooked, from frozen, fat added in cooking, NS as to type of fat                        | 82 | 4   | B | 4 |
| 73102217 | 3000_Vegetables | Carrots, cooked, from fresh, made with oil                                                   | 82 | 4.5 | A | 4 |
| 75219041 | 3000_Vegetables | Mushrooms, cooked, from canned, made with margarine                                          | 82 | 4   | B | 4 |
| 72118231 | 3000_Vegetables | Greens, cooked, from frozen, made with butter                                                | 82 | 4.5 | B | 4 |
| 75212023 | 3000_Vegetables | Cabbage, red, cooked, made with margarine                                                    | 82 | 4.5 | A | 4 |
| 75200121 | 3000_Vegetables | Vegetables, NS as to type, cooked, made with oil                                             | 82 | 4.5 | A | 3 |
| 75311024 | 3000_Vegetables | Mixed vegetables, cooked, NS as to form, made with oil                                       | 82 | 4.5 | A | 3 |
| 75311027 | 3000_Vegetables | Mixed vegetables, cooked, from frozen, made with oil                                         | 82 | 4.5 | A | 3 |
| 73102214 | 3000_Vegetables | Carrots, cooked, NS as to form, made with oil                                                | 82 | 4.5 | A | 4 |
| 73102224 | 3000_Vegetables | Carrots, cooked, from frozen, made with oil                                                  | 82 | 4.5 | A | 4 |
| 73111224 | 3000_Vegetables | Peas and carrots, cooked, NS as to form, made with oil                                       | 81 | 4.5 | A | 4 |
| 73111227 | 3000_Vegetables | Peas and carrots, cooked, from fresh, made with oil                                          | 81 | 4.5 | A | 4 |
| 73111230 | 3000_Vegetables | Peas and carrots, cooked, from frozen, made with oil                                         | 81 | 4.5 | A | 4 |
| 72128234 | 3000_Vegetables | Turnip greens, cooked, from canned, made with butter                                         | 81 | 4   | B | 4 |
| 75231002 | 3000_Vegetables | Snowpea, cooked, from frozen, NS as to fat added in cooking                                  | 81 | 5   | A | 4 |
| 75231022 | 3000_Vegetables | Snowpea, cooked, from frozen, fat added in cooking, NS as to type of fat                     | 81 | 5   | A | 4 |
| 75217010 | 3000_Vegetables | Eggplant, cooked, fat not added in cooking                                                   | 81 | 4   | A | 3 |
| 73102229 | 3000_Vegetables | Carrots, cooked, from canned, made with margarine                                            | 81 | 4   | B | 4 |
| 75219100 | 3000_Vegetables | Mushroom, Asian, cooked, from dried                                                          | 81 | 4.5 | A | 3 |
| 75231000 | 3000_Vegetables | Snowpea, cooked, NS as to form, NS as to fat added in cooking                                | 81 | 5   | A | 4 |
| 75231020 | 3000_Vegetables | Snowpea, cooked, NS as to form, fat added in cooking, NS as to type of fat                   | 81 | 5   | A | 4 |
| 75230020 | 3000_Vegetables | Sauerkraut, cooked, fat added in cooking                                                     | 81 | 4   | B | 4 |
| 75302205 | 3000_Vegetables | Beans, string, green, with onions, cooked, fat not added in cooking                          | 81 | 4.5 | A | 3 |
| 75220001 | 3000_Vegetables | Okra, cooked, from fresh, NS as to fat added in cooking                                      | 81 | 4.5 | A | 4 |
| 75220021 | 3000_Vegetables | Okra, cooked, from fresh, fat added in cooking, NS as to type of fat                         | 81 | 4.5 | A | 4 |
| 75316022 | 3000_Vegetables | Squash, summer, yellow or green, and onions, cooked, made with oil                           | 81 | 4.5 | B | 4 |
| 72123040 | 3000_Vegetables | Poke greens, cooked, made with butter                                                        | 81 | 4.5 | B | 4 |
| 74504121 | 3000_Vegetables | Tomato and onion, cooked, made with oil                                                      | 81 | 4.5 | B | 4 |
| 72113200 | 3000_Vegetables | Dandelion greens, cooked, NS as to fat added in cooking                                      | 81 | 4   | B | 4 |
| 72113220 | 3000_Vegetables | Dandelion greens, cooked, fat added in cooking, NS as to type of fat                         | 81 | 4   | B | 4 |
| 72119203 | 3000_Vegetables | Kale, cooked, from canned, NS as to fat added in cooking                                     | 81 | 4   | B | 4 |
| 72119223 | 3000_Vegetables | Kale, cooked, from canned, fat added in cooking, NS as to type of fat                        | 81 | 4   | B | 4 |
| 75232122 | 3000_Vegetables | Seaweed, cooked, made with butter                                                            | 80 | 4.5 | A | 4 |
| 75311013 | 3000_Vegetables | Mixed vegetables, cooked, from canned, fat not added in cooking                              | 80 | 4.5 | A | 3 |
| 72110231 | 3000_Vegetables | Cress, cooked, NS as to form, made with butter                                               | 80 | 4   | B | 4 |
| 72110234 | 3000_Vegetables | Cress, cooked, from fresh, made with butter                                                  | 80 | 4   | B | 4 |
| 72110237 | 3000_Vegetables | Cress, cooked, from canned, made with butter                                                 | 80 | 4   | B | 4 |

Supplementary Table 8. Original (uncorrected) scores for all food items.

|          |                 |                                                                                              |    |     |   |   |
|----------|-----------------|----------------------------------------------------------------------------------------------|----|-----|---|---|
| 75220003 | 3000_Vegetables | Okra, cooked, from canned, NS as to fat added in cooking                                     | 80 | 4.5 | A | 4 |
| 75220023 | 3000_Vegetables | Okra, cooked, from canned, fat added in cooking, NS as to type of fat                        | 80 | 4.5 | A | 4 |
| 75204971 | 3000_Vegetables | Beans, string, cooked, from canned, NS as to color, made with margarine                      | 80 | 4   | B | 4 |
| 75206041 | 3000_Vegetables | Beans, string, yellow, cooked, from canned, made with margarine                              | 80 | 4   | B | 4 |
| 75234033 | 3000_Vegetables | Turnip, cooked, NS as to form, made with oil                                                 | 80 | 4   | B | 4 |
| 75202002 | 3000_Vegetables | Asparagus, cooked, from frozen, NS as to fat added in cooking                                | 80 | 4   | B | 4 |
| 73111210 | 3000_Vegetables | Peas and carrots, cooked, NS as to form, fat not added in cooking                            | 79 | 4.5 | A | 3 |
| 73111212 | 3000_Vegetables | Peas and carrots, cooked, from frozen, fat not added in cooking                              | 79 | 4.5 | A | 3 |
| 75224021 | 3000_Vegetables | Peas, green, cooked, from fresh, fat not added in cooking                                    | 79 | 5   | A | 3 |
| 75234030 | 3000_Vegetables | Turnip, cooked, from frozen, made with oil                                                   | 79 | 4   | A | 4 |
| 73402010 | 3000_Vegetables | Sweet potato, baked, peel eaten, fat not added in cooking                                    | 79 | 4.5 | A | 3 |
| 73403010 | 3000_Vegetables | Sweet potato, baked, peel not eaten, fat not added in cooking                                | 79 | 4.5 | A | 3 |
| 75205052 | 3000_Vegetables | Beans, string, green, cooked, from canned, made with margarine                               | 79 | 4   | B | 4 |
| 75302045 | 3000_Vegetables | Beans, string, green, with almonds, cooked, fat added in cooking, NS as to type of fat       | 79 | 4.5 | A | 4 |
| 75219003 | 3000_Vegetables | Mushrooms, cooked, from canned, NS as to fat added in cooking                                | 79 | 4   | B | 4 |
| 75219023 | 3000_Vegetables | Mushrooms, cooked, from canned, fat added in cooking, NS as to type of fat                   | 79 | 4   | B | 4 |
| 75231025 | 3000_Vegetables | Snowpea, cooked, NS as to form, made with margarine                                          | 79 | 5   | A | 4 |
| 75231031 | 3000_Vegetables | Snowpea, cooked, from frozen, made with margarine                                            | 79 | 5   | A | 4 |
| 75234027 | 3000_Vegetables | Turnip, cooked, from fresh, made with oil                                                    | 79 | 4   | A | 4 |
| 72107203 | 3000_Vegetables | Collards, cooked, from canned, NS as to fat added in cooking                                 | 79 | 4.5 | A | 4 |
| 72107223 | 3000_Vegetables | Collards, cooked, from canned, fat added in cooking, NS as to type of fat                    | 79 | 4.5 | A | 4 |
| 75201033 | 3000_Vegetables | Artichoke, cooked, NS as to form, made with margarine                                        | 79 | 4.5 | A | 4 |
| 75201039 | 3000_Vegetables | Artichoke, cooked, from canned, made with margarine                                          | 79 | 4.5 | A | 4 |
| 75201042 | 3000_Vegetables | Artichoke, cooked, from frozen, made with margarine                                          | 79 | 4.5 | A | 4 |
| 75207021 | 3000_Vegetables | Bean sprouts, cooked, from fresh, fat added in cooking                                       | 79 | 4.5 | B | 4 |
| 75207000 | 3000_Vegetables | Bean sprouts, cooked, NS as to form, NS as to fat added in cooking                           | 79 | 4.5 | B | 4 |
| 75207001 | 3000_Vegetables | Bean sprouts, cooked, from fresh, NS as to fat added in cooking                              | 79 | 4.5 | B | 4 |
| 75207020 | 3000_Vegetables | Bean sprouts, cooked, NS as to form, fat added in cooking                                    | 79 | 4.5 | B | 4 |
| 72116150 | 3000_Vegetables | Caesar salad, with romaine, no dressing                                                      | 79 | 4.5 | A | 4 |
| 73102216 | 3000_Vegetables | Carrots, cooked, NS as to form, made with margarine                                          | 79 | 4.5 | A | 4 |
| 73102226 | 3000_Vegetables | Carrots, cooked, from frozen, made with margarine                                            | 79 | 4.5 | A | 4 |
| 72132201 | 3000_Vegetables | Bitter melon leaves, horseradish leaves, jute leaves, or radish leaves, cooked, fat added in | 79 | 4   | C | 4 |
| 75234024 | 3000_Vegetables | Turnip, cooked, from canned, made with oil                                                   | 79 | 4.5 | A | 4 |
| 73103000 | 3000_Vegetables | Carrots, canned, low sodium, NS as to fat added in cooking                                   | 79 | 4.5 | A | 4 |
| 73103020 | 3000_Vegetables | Carrots, canned, low sodium, fat added in cooking, NS as to type of fat                      | 79 | 4.5 | A | 4 |
| 75206032 | 3000_Vegetables | Beans, string, yellow, cooked, NS as to form, made with margarine                            | 79 | 4.5 | A | 4 |
| 75204962 | 3000_Vegetables | Beans, string, cooked, NS as to form, NS as to color, made with margarine                    | 79 | 4.5 | A | 4 |
| 75205043 | 3000_Vegetables | Beans, string, green, cooked, NS as to form, made with margarine                             | 79 | 4.5 | A | 4 |
| 74505021 | 3000_Vegetables | Tomato with corn and okra, cooked, made with oil                                             | 78 | 4.5 | B | 4 |
| 75228021 | 3000_Vegetables | Rutabaga, cooked, made with oil                                                              | 78 | 4.5 | B | 4 |
| 75234032 | 3000_Vegetables | Turnip, cooked, from frozen, made with margarine                                             | 78 | 4   | B | 4 |
| 75234035 | 3000_Vegetables | Turnip, cooked, NS as to form, made with margarine                                           | 78 | 4   | B | 4 |
| 72107231 | 3000_Vegetables | Collards, cooked, from frozen, made with butter                                              | 78 | 4.5 | B | 4 |
| 75202035 | 3000_Vegetables | Asparagus, cooked, from canned, made with butter                                             | 78 | 4   | B | 4 |
| 75202028 | 3000_Vegetables | Asparagus, cooked, from fresh, made with butter                                              | 78 | 4.5 | A | 4 |
| 75330151 | 3000_Vegetables | Vegetable combination, excluding carrots, broccoli, and dark-green leafy; cooked, no sauc    | 78 | 4.5 | A | 3 |
| 72122225 | 3000_Vegetables | Mustard greens, cooked, NS as to form, made with butter                                      | 78 | 4   | B | 4 |
| 72122228 | 3000_Vegetables | Mustard greens, cooked, from fresh, made with butter                                         | 78 | 4   | B | 4 |
| 72113240 | 3000_Vegetables | Dandelion greens, cooked, made with butter                                                   | 78 | 4   | B | 4 |
| 75201036 | 3000_Vegetables | Artichoke, cooked, from fresh, made with margarine                                           | 78 | 5   | A | 4 |
| 75206038 | 3000_Vegetables | Beans, string, yellow, cooked, from frozen, made with margarine                              | 78 | 4.5 | A | 4 |
| 75204968 | 3000_Vegetables | Beans, string, cooked, from frozen, NS as to color, made with margarine                      | 78 | 4.5 | A | 4 |
| 75205049 | 3000_Vegetables | Beans, string, green, cooked, from frozen, made with margarine                               | 78 | 4.5 | A | 4 |
| 75208113 | 3000_Vegetables | Beets, canned, low sodium, made with margarine                                               | 77 | 4.5 | A | 4 |
| 75302047 | 3000_Vegetables | Beans, string, green, with almonds, cooked, made with butter                                 | 77 | 4.5 | A | 4 |
| 72122234 | 3000_Vegetables | Mustard greens, cooked, from canned, made with butter                                        | 77 | 4   | B | 4 |
| 73303023 | 3000_Vegetables | Squash, winter type, baked, no sugar added in cooking, made with margarine                   | 77 | 4.5 | A | 4 |
| 75316024 | 3000_Vegetables | Squash, summer, yellow or green, and onions, cooked, made with margarine                     | 77 | 4.5 | B | 4 |
| 75205110 | 3000_Vegetables | Beans, string, green, canned, low sodium, NS as to fat added in cooking                      | 77 | 4.5 | A | 4 |
| 75205130 | 3000_Vegetables | Beans, string, green, canned, low sodium, fat added in cooking, NS as to type of fat         | 77 | 4.5 | A | 4 |
| 75202025 | 3000_Vegetables | Asparagus, cooked, NS as to form, made with butter                                           | 77 | 4.5 | A | 4 |
| 75202032 | 3000_Vegetables | Asparagus, cooked, from frozen, made with butter                                             | 77 | 4.5 | A | 4 |
| 75233220 | 3000_Vegetables | Squash, spaghetti, cooked, fat not added in cooking                                          | 77 | 4.5 | A | 3 |
| 74504000 | 3000_Vegetables | Tomato and okra, cooked, NS as to fat added in cooking                                       | 77 | 4.5 | B | 4 |
| 74504020 | 3000_Vegetables | Tomato and okra, cooked, fat added in cooking, NS as to type of fat                          | 77 | 4.5 | B | 4 |
| 73102219 | 3000_Vegetables | Carrots, cooked, from fresh, made with margarine                                             | 77 | 4.5 | A | 4 |
| 75316031 | 3000_Vegetables | Squash, summer, yellow or green, with tomato sauce, cooked, fat added in cooking             | 77 | 4.5 | B | 4 |
| 75316032 | 3000_Vegetables | Squash, summer, yellow or green, with tomato sauce, cooked, NS as to fat added in cookii     | 77 | 4.5 | B | 4 |
| 75204965 | 3000_Vegetables | Beans, string, cooked, from fresh, NS as to color, made with margarine                       | 76 | 4.5 | A | 4 |
| 75205046 | 3000_Vegetables | Beans, string, green, cooked, from fresh, made with margarine                                | 76 | 4.5 | A | 4 |
| 73111226 | 3000_Vegetables | Peas and carrots, cooked, NS as to form, made with margarine                                 | 76 | 4.5 | A | 4 |
| 73111229 | 3000_Vegetables | Peas and carrots, cooked, from fresh, made with margarine                                    | 76 | 4.5 | A | 4 |
| 73111232 | 3000_Vegetables | Peas and carrots, cooked, from frozen, made with margarine                                   | 76 | 4.5 | A | 4 |
| 75226063 | 3000_Vegetables | Peppers, red, cooked, made with margarine                                                    | 76 | 4   | B | 4 |
| 75221012 | 3000_Vegetables | Onions, cooked, from frozen, fat not added in cooking                                        | 76 | 4.5 | A | 3 |
| 72128403 | 3000_Vegetables | Turnip greens with roots, cooked, from canned, NS as to fat added in cooking                 | 76 | 4   | B | 4 |
| 72128423 | 3000_Vegetables | Turnip greens with roots, cooked, from canned, fat added in cooking                          | 76 | 4   | B | 4 |
| 75311032 | 3000_Vegetables | Mixed vegetables, cooked, from canned, made with margarine                                   | 76 | 4.5 | A | 4 |
| 74204010 | 3000_Vegetables | Tomatoes, NS as to form, stewed                                                              | 76 | 4.5 | B | 4 |
| 74204013 | 3000_Vegetables | Tomatoes, from canned, stewed                                                                | 76 | 4.5 | B | 4 |
| 72203090 | 3000_Vegetables | Broccoli, chinese, cooked, NS as to form, made with butter                                   | 76 | 4   | C | 4 |
| 72203130 | 3000_Vegetables | Broccoli, chinese, cooked, from fresh, made with butter                                      | 76 | 4   | C | 4 |
| 72203170 | 3000_Vegetables | Broccoli, chinese, cooked, from frozen, made with butter                                     | 76 | 4   | C | 4 |
| 72119225 | 3000_Vegetables | Kale, cooked, NS as to form, made with butter                                                | 76 | 4   | B | 4 |
| 75235000 | 3000_Vegetables | Water chestnut                                                                               | 75 | 5   | A | 1 |
| 75226023 | 3000_Vegetables | Peppers, green, cooked, made with margarine                                                  | 75 | 4   | B | 4 |

Supplementary Table 8. Original (uncorrected) scores for all food items.

|          |                 |                                                                                              |    |     |   |   |
|----------|-----------------|----------------------------------------------------------------------------------------------|----|-----|---|---|
| 74504123 | 3000_Vegetables | Tomato and onion, cooked, made with margarine                                                | 75 | 4   | B | 4 |
| 75209021 | 3000_Vegetables | Brussels sprouts, cooked, from fresh, fat added in cooking, NS as to type of fat             | 75 | 4.5 | A | 4 |
| 75234029 | 3000_Vegetables | Turnip, cooked, from fresh, made with margarine                                              | 75 | 4   | B | 4 |
| 75214000 | 3000_Vegetables | Cauliflower, cooked, NS as to form, NS as to fat added in cooking                            | 75 | 4.5 | A | 4 |
| 75214020 | 3000_Vegetables | Cauliflower, cooked, NS as to form, fat added in cooking, NS as to type of fat               | 75 | 4.5 | A | 4 |
| 72107234 | 3000_Vegetables | Collards, cooked, from canned, made with butter                                              | 75 | 4.5 | B | 4 |
| 75214002 | 3000_Vegetables | Cauliflower, cooked, from frozen, NS as to fat added in cooking                              | 75 | 4.5 | A | 4 |
| 75214022 | 3000_Vegetables | Cauliflower, cooked, from frozen, fat added in cooking, NS as to type of fat                 | 75 | 4.5 | A | 4 |
| 75209001 | 3000_Vegetables | Brussels sprouts, cooked, from fresh, NS as to fat added in cooking                          | 75 | 4.5 | B | 4 |
| 75234026 | 3000_Vegetables | Turnip, cooked, from canned, made with margarine                                             | 75 | 4.5 | A | 4 |
| 72119228 | 3000_Vegetables | Kale, cooked, from fresh, made with butter                                                   | 74 | 4   | B | 4 |
| 75224133 | 3000_Vegetables | Peas, green, canned, low sodium, made with margarine                                         | 74 | 5   | A | 4 |
| 73403021 | 3000_Vegetables | Sweet potato, baked, peel not eaten, made with oil                                           | 74 | 4   | A | 4 |
| 73410340 | 3000_Vegetables | Sweet potato fries, from fresh, baked                                                        | 74 | 4.5 | B | 4 |
| 73111233 | 3000_Vegetables | Peas and carrots, cooked, from canned, made with oil                                         | 74 | 4.5 | A | 4 |
| 75217299 | 3000_Vegetables | Flowers or blossoms of sesbania, squash, or lily, NS as to fat added in cooking              | 74 | 4   | A | 4 |
| 75217301 | 3000_Vegetables | Flowers or blossoms of sesbania, squash, or lily, fat added in cooking                       | 74 | 4   | A | 4 |
| 75230000 | 3000_Vegetables | Sauerkraut, cooked, NS as to fat added in cooking                                            | 74 | 4   | C | 4 |
| 75224043 | 3000_Vegetables | Peas, green, cooked, from fresh, made with oil                                               | 74 | 5   | A | 4 |
| 73111213 | 3000_Vegetables | Peas and carrots, cooked, from canned, fat not added in cooking                              | 74 | 4.5 | A | 3 |
| 73402021 | 3000_Vegetables | Sweet potato, baked, peel eaten, made with oil                                               | 73 | 4.5 | A | 4 |
| 75216721 | 3000_Vegetables | Cucumber, cooked, made with oil                                                              | 73 | 4   | C | 4 |
| 75228023 | 3000_Vegetables | Rutabaga, cooked, made with margarine                                                        | 73 | 4.5 | A | 4 |
| 75315210 | 3000_Vegetables | Peas and mushrooms, cooked, fat not added in cooking                                         | 73 | 5   | A | 3 |
| 74504148 | 3000_Vegetables | Tomato and celery, cooked, NS as to fat added in cooking                                     | 73 | 4   | B | 4 |
| 72119231 | 3000_Vegetables | Kale, cooked, from frozen, made with butter                                                  | 73 | 4   | B | 4 |
| 75223012 | 3000_Vegetables | Peas, cowpeas, field peas, or blackeye peas, not dried, cooked, from frozen, fat not added   | 73 | 5   | A | 3 |
| 75219000 | 3000_Vegetables | Mushrooms, cooked, NS as to form, NS as to fat added in cooking                              | 73 | 4.5 | A | 4 |
| 75219001 | 3000_Vegetables | Mushrooms, cooked, from fresh, NS as to fat added in cooking                                 | 73 | 4.5 | A | 4 |
| 75219002 | 3000_Vegetables | Mushrooms, cooked, from frozen, NS as to fat added in cooking                                | 73 | 4.5 | A | 4 |
| 75219020 | 3000_Vegetables | Mushrooms, cooked, NS as to form, fat added in cooking, NS as to type of fat                 | 73 | 4.5 | A | 4 |
| 75219021 | 3000_Vegetables | Mushrooms, cooked, from fresh, fat added in cooking, NS as to type of fat                    | 73 | 4.5 | A | 4 |
| 75219022 | 3000_Vegetables | Mushrooms, cooked, from frozen, fat added in cooking, NS as to type of fat                   | 73 | 4.5 | A | 4 |
| 74505023 | 3000_Vegetables | Tomato with corn and okra, cooked, made with margarine                                       | 73 | 4.5 | B | 4 |
| 72116222 | 3000_Vegetables | Escarole, cooked, made with butter                                                           | 73 | 4   | B | 4 |
| 75208720 | 3000_Vegetables | Broccoli, cooked, fat added in cooking, NS as to type of fat                                 | 73 | 4.5 | A | 4 |
| 75223010 | 3000_Vegetables | Peas, cowpeas, field peas, or blackeye peas, not dried, cooked, NS as to form, fat not added | 73 | 5   | A | 3 |
| 72201224 | 3000_Vegetables | Broccoli, cooked, from fresh, made with butter                                               | 73 | 4.5 | A | 4 |
| 72133199 | 3000_Vegetables | Sweet potato leaves, squash leaves, pumpkin leaves, chrysanthemum leaves, bean leaves        | 73 | 3.5 | C | 4 |
| 72133201 | 3000_Vegetables | Sweet potato leaves, squash leaves, pumpkin leaves, chrysanthemum leaves, bean leaves        | 73 | 3.5 | C | 4 |
| 72201201 | 3000_Vegetables | Broccoli, cooked, from fresh, NS as to fat added in cooking                                  | 73 | 4.5 | A | 4 |
| 72201221 | 3000_Vegetables | Broccoli, cooked, from fresh, fat added in cooking, NS as to type of fat                     | 73 | 4.5 | A | 4 |
| 73103022 | 3000_Vegetables | Carrots, canned, low sodium, made with butter                                                | 72 | 4.5 | A | 4 |
| 72201200 | 3000_Vegetables | Broccoli, cooked, NS as to form, NS as to fat added in cooking                               | 72 | 4.5 | A | 4 |
| 72201220 | 3000_Vegetables | Broccoli, cooked, NS as to form, fat added in cooking, NS as to type of fat                  | 72 | 4.5 | A | 4 |
| 72201202 | 3000_Vegetables | Broccoli, cooked, from frozen, NS as to fat added in cooking                                 | 72 | 4.5 | A | 4 |
| 72201222 | 3000_Vegetables | Broccoli, cooked, from frozen, fat added in cooking, NS as to type of fat                    | 72 | 4.5 | A | 4 |
| 75220028 | 3000_Vegetables | Okra, cooked, from fresh, made with butter                                                   | 72 | 4.5 | A | 4 |
| 75220000 | 3000_Vegetables | Okra, cooked, NS as to form, NS as to fat added in cooking                                   | 72 | 4.5 | A | 4 |
| 75220002 | 3000_Vegetables | Okra, cooked, from frozen, NS as to fat added in cooking                                     | 72 | 4.5 | A | 4 |
| 75220020 | 3000_Vegetables | Okra, cooked, NS as to form, fat added in cooking, NS as to type of fat                      | 72 | 4.5 | A | 4 |
| 75220022 | 3000_Vegetables | Okra, cooked, from frozen, fat added in cooking, NS as to type of fat                        | 72 | 4.5 | A | 4 |
| 75315121 | 3000_Vegetables | Peas and onions, cooked, made with oil                                                       | 72 | 4.5 | A | 3 |
| 75306998 | 3000_Vegetables | Green peppers and onions, cooked, fat not added in cooking                                   | 72 | 3.5 | B | 3 |
| 75510020 | 3000_Vegetables | Olives, black                                                                                | 72 | 3.5 | C | 3 |
| 75143350 | 3000_Vegetables | Lettuce, salad with egg, cheese, tomato, and/or carrots, with or without other vegetables,   | 72 | 4.5 | B | 4 |
| 72119234 | 3000_Vegetables | Kale, cooked, from canned, made with butter                                                  | 72 | 4   | B | 4 |
| 75317020 | 3000_Vegetables | Vegetables, stew type, cooked, fat not added in cooking                                      | 72 | 4.5 | A | 3 |
| 75317011 | 3000_Vegetables | Vegetables, stew type, cooked, made with oil                                                 | 72 | 4.5 | A | 4 |
| 75311100 | 3000_Vegetables | Mixed vegetables, canned, low sodium, NS as to fat added in cooking                          | 72 | 5   | A | 4 |
| 75311120 | 3000_Vegetables | Mixed vegetables, canned, low sodium, fat added in cooking, NS as to type of fat             | 72 | 5   | A | 4 |
| 75510030 | 3000_Vegetables | Olives, green, stuffed                                                                       | 71 | 3   | C | 3 |
| 75307001 | 3000_Vegetables | Green peppers and onions, cooked, made with oil                                              | 71 | 4   | B | 4 |
| 75302009 | 3000_Vegetables | Beans, string, green, with tomatoes, cooked, NS as to fat added in cooking                   | 71 | 4.5 | A | 4 |
| 75302011 | 3000_Vegetables | Beans, string, green, with tomatoes, cooked, fat added in cooking                            | 71 | 4.5 | A | 4 |
| 75208013 | 3000_Vegetables | Beets, cooked, from canned, fat not added in cooking                                         | 71 | 4   | B | 3 |
| 75220035 | 3000_Vegetables | Okra, cooked, from canned, made with butter                                                  | 71 | 4.5 | A | 4 |
| 72201214 | 3000_Vegetables | Broccoli, cooked, NS as to form, made with butter                                            | 71 | 4.5 | A | 4 |
| 72201227 | 3000_Vegetables | Broccoli, cooked, from frozen, made with butter                                              | 71 | 4.5 | A | 4 |
| 75216723 | 3000_Vegetables | Cucumber, cooked, made with margarine                                                        | 71 | 4   | B | 4 |
| 75213100 | 3000_Vegetables | Cactus, cooked, NS as to fat added in cooking                                                | 71 | 4   | B | 4 |
| 75213120 | 3000_Vegetables | Cactus, cooked, fat added in cooking, NS as to type of fat                                   | 71 | 4   | B | 4 |
| 75209000 | 3000_Vegetables | Brussels sprouts, cooked, NS as to form, NS as to fat added in cooking                       | 71 | 4.5 | A | 4 |
| 75209020 | 3000_Vegetables | Brussels sprouts, cooked, NS as to form, fat added in cooking, NS as to type of fat          | 71 | 4.5 | A | 4 |
| 75511020 | 3000_Vegetables | Peppers, pickled                                                                             | 71 | 4.5 | A | 3 |
| 75216321 | 3000_Vegetables | Corn, yellow, canned, low sodium, made with oil                                              | 71 | 4.5 | A | 3 |
| 75315216 | 3000_Vegetables | Peas and mushrooms, cooked, made with oil                                                    | 71 | 4.5 | A | 4 |
| 73210010 | 3000_Vegetables | Calabaza, cooked                                                                             | 71 | 4.5 | A | 4 |
| 74503010 | 3000_Vegetables | Tomato and corn, cooked, fat not added in cooking                                            | 71 | 4   | B | 3 |
| 75512010 | 3000_Vegetables | Radishes, pickled, Hawaiian style                                                            | 70 | 4   | C | 4 |
| 75221030 | 3000_Vegetables | Onions, pearl, cooked, NS as to form                                                         | 70 | 4.5 | B | 3 |
| 75221032 | 3000_Vegetables | Onions, pearl, cooked, from frozen                                                           | 70 | 4.5 | B | 3 |
| 75209002 | 3000_Vegetables | Brussels sprouts, cooked, from frozen, NS as to fat added in cooking                         | 70 | 4.5 | A | 4 |
| 75209022 | 3000_Vegetables | Brussels sprouts, cooked, from frozen, fat added in cooking, NS as to type of fat            | 70 | 4.5 | A | 4 |
| 75208740 | 3000_Vegetables | Broccoli, cooked, made with butter                                                           | 70 | 4.5 | A | 4 |
| 74504022 | 3000_Vegetables | Tomato and okra, cooked, made with butter                                                    | 70 | 4   | B | 4 |

Supplementary Table 8. Original (uncorrected) scores for all food items.

|          |                 |                                                                                             |    |     |   |   |
|----------|-----------------|---------------------------------------------------------------------------------------------|----|-----|---|---|
| 75109600 | 3000_Vegetables | Corn, raw                                                                                   | 70 | 4.5 | A | 1 |
| 75209041 | 3000_Vegetables | Brussels sprouts, cooked, from fresh, made with butter                                      | 70 | 4.5 | B | 4 |
| 75510000 | 3000_Vegetables | Olives, NFS                                                                                 | 70 | 3.5 | C | 3 |
| 75221010 | 3000_Vegetables | Onions, cooked, NS as to form, fat not added in cooking                                     | 70 | 4.5 | A | 3 |
| 75535000 | 3000_Vegetables | Zucchini, pickled                                                                           | 70 | 4.5 | B | 3 |
| 73111235 | 3000_Vegetables | Peas and carrots, cooked, from canned, made with margarine                                  | 70 | 4.5 | A | 4 |
| 75214003 | 3000_Vegetables | Cauliflower, cooked, from canned, NS as to fat added in cooking                             | 70 | 4.5 | A | 4 |
| 75224045 | 3000_Vegetables | Peas, green, cooked, from fresh, made with margarine                                        | 70 | 5   | A | 4 |
| 74504149 | 3000_Vegetables | Tomato and celery, cooked, fat added in cooking                                             | 70 | 4   | B | 4 |
| 75214025 | 3000_Vegetables | Cauliflower, cooked, NS as to form, made with butter                                        | 69 | 4.5 | A | 4 |
| 75214031 | 3000_Vegetables | Cauliflower, cooked, from frozen, made with butter                                          | 69 | 4.5 | A | 4 |
| 75219031 | 3000_Vegetables | Mushrooms, cooked, NS as to form, made with butter                                          | 69 | 4.5 | A | 4 |
| 75219034 | 3000_Vegetables | Mushrooms, cooked, from fresh, made with butter                                             | 69 | 4.5 | A | 4 |
| 75219037 | 3000_Vegetables | Mushrooms, cooked, from frozen, made with butter                                            | 69 | 4.5 | A | 4 |
| 75330120 | 3000_Vegetables | Vegetable combination, including carrots, broccoli, and/or dark-green leafy; cooked, no sa  | 69 | 4   | B | 4 |
| 75311122 | 3000_Vegetables | Mixed vegetables, canned, low sodium, made with butter                                      | 69 | 4.5 | A | 4 |
| 75204011 | 3000_Vegetables | Beans, lima, immature, cooked, from fresh, fat not added in cooking                         | 69 | 5   | A | 3 |
| 75217021 | 3000_Vegetables | Eggplant, cooked, made with oil                                                             | 69 | 4   | B | 4 |
| 75330100 | 3000_Vegetables | Vegetable combination, including carrots, broccoli, and/or dark-green leafy; cooked, no sa  | 69 | 4   | B | 4 |
| 75510010 | 3000_Vegetables | Olives, green                                                                               | 69 | 3.5 | C | 3 |
| 75200110 | 3000_Vegetables | Vegetables, NS as to type, cooked, fat not added in cooking                                 | 69 | 5   | A | 3 |
| 75311010 | 3000_Vegetables | Mixed vegetables, cooked, NS as to form, fat not added in cooking                           | 69 | 5   | A | 3 |
| 75311012 | 3000_Vegetables | Mixed vegetables, cooked, from frozen, fat not added in cooking                             | 69 | 5   | A | 3 |
| 73410200 | 3000_Vegetables | Sweet potato fries, NFS                                                                     | 69 | 4.5 | B | 4 |
| 73410300 | 3000_Vegetables | Sweet potato fries, NS as to fresh or frozen                                                | 69 | 4.5 | B | 4 |
| 75223011 | 3000_Vegetables | Peas, cowpeas, field peas, or blackeye peas, not dried, cooked, from fresh, fat not added i | 69 | 5   | A | 3 |
| 75315250 | 3000_Vegetables | Cowpeas with snap beans, cooked, fat not added in cooking                                   | 69 | 4.5 | A | 3 |
| 75205132 | 3000_Vegetables | Beans, string, green, canned, low sodium, made with butter                                  | 69 | 4.5 | A | 4 |
| 75208121 | 3000_Vegetables | Beets, cooked, NS as to form, made with oil                                                 | 69 | 4   | B | 4 |
| 75208124 | 3000_Vegetables | Beets, cooked, from fresh, made with oil                                                    | 69 | 4   | B | 4 |
| 75208127 | 3000_Vegetables | Beets, cooked, from frozen, made with oil                                                   | 69 | 4   | B | 4 |
| 75302213 | 3000_Vegetables | Beans, string, green, with onions, cooked, made with margarine                              | 69 | 4.5 | A | 4 |
| 73201000 | 3000_Vegetables | Pumpkin, cooked, NS as to form, NS as to fat added in cooking                               | 68 | 4.5 | B | 4 |
| 73201020 | 3000_Vegetables | Pumpkin, cooked, NS as to form, fat added in cooking, NS as to type of fat                  | 68 | 4.5 | B | 4 |
| 74205020 | 3000_Vegetables | Tomato, green, pickled                                                                      | 68 | 4.5 | B | 3 |
| 75213000 | 3000_Vegetables | Cabbage, savoy, cooked, NS as to fat added in cooking                                       | 68 | 4.5 | A | 4 |
| 75213020 | 3000_Vegetables | Cabbage, savoy, cooked, fat added in cooking, NS as to type of fat                          | 68 | 4.5 | A | 4 |
| 75208130 | 3000_Vegetables | Beets, cooked, from canned, made with oil                                                   | 68 | 4   | C | 4 |
| 73403023 | 3000_Vegetables | Sweet potato, baked, peel not eaten, made with margarine                                    | 68 | 4.5 | A | 4 |
| 73201001 | 3000_Vegetables | Pumpkin, cooked, from fresh, NS as to fat added in cooking                                  | 68 | 4.5 | B | 4 |
| 73201002 | 3000_Vegetables | Pumpkin, cooked, from frozen, NS as to fat added in cooking                                 | 68 | 4.5 | B | 4 |
| 73201021 | 3000_Vegetables | Pumpkin, cooked, from fresh, fat added in cooking, NS as to type of fat                     | 68 | 4.5 | B | 4 |
| 73201022 | 3000_Vegetables | Pumpkin, cooked, from frozen, fat added in cooking, NS as to type of fat                    | 68 | 4.5 | B | 4 |
| 75215000 | 3000_Vegetables | Celery, cooked, NS as to fat added in cooking                                               | 68 | 4   | B | 4 |
| 75215020 | 3000_Vegetables | Celery, cooked, fat added in cooking, NS as to type of fat                                  | 68 | 4   | B | 4 |
| 73410330 | 3000_Vegetables | Sweet potato fries, from fresh, fried                                                       | 68 | 4.5 | B | 4 |
| 75502010 | 3000_Vegetables | Cauliflower, pickled                                                                        | 68 | 4   | B | 3 |
| 75208700 | 3000_Vegetables | Broccoflower, cooked, NS as to fat added in cooking                                         | 68 | 4.5 | A | 4 |
| 73402023 | 3000_Vegetables | Sweet potato, baked, peel eaten, made with margarine                                        | 68 | 4.5 | A | 4 |
| 75208010 | 3000_Vegetables | Beets, cooked, NS as to form, fat not added in cooking                                      | 68 | 4.5 | B | 3 |
| 75208011 | 3000_Vegetables | Beets, cooked, from fresh, fat not added in cooking                                         | 68 | 4.5 | B | 3 |
| 75208012 | 3000_Vegetables | Beets, cooked, from frozen, fat not added in cooking                                        | 68 | 4.5 | B | 3 |
| 73405010 | 3000_Vegetables | Sweet potato, boiled, fat not added in cooking                                              | 68 | 4.5 | B | 3 |
| 73410320 | 3000_Vegetables | Sweet potato fries, frozen, baked                                                           | 67 | 4.5 | B | 4 |
| 73410500 | 3000_Vegetables | Sweet potato fries, school                                                                  | 67 | 4.5 | B | 4 |
| 73420200 | 3000_Vegetables | Sweet potato tots, school                                                                   | 67 | 4.5 | B | 4 |
| 75221014 | 3000_Vegetables | Onions, cooked, NS as to form, made with oil                                                | 67 | 4.5 | A | 4 |
| 73405021 | 3000_Vegetables | Sweet potato, boiled, made with oil                                                         | 67 | 4.5 | B | 4 |
| 71905000 | 3000_Vegetables | Ripe plantain, raw                                                                          | 67 | 4   | B | 1 |
| 75503085 | 3000_Vegetables | Ginger root, pickled                                                                        | 67 | 3.5 | B | 4 |
| 75221031 | 3000_Vegetables | Onions, pearl, cooked, from fresh                                                           | 67 | 4.5 | B | 3 |
| 75221033 | 3000_Vegetables | Onions, pearl, cooked, from canned                                                          | 67 | 4.5 | B | 3 |
| 75302505 | 3000_Vegetables | Beans, string, green, and potatoes, cooked, fat not added in cooking                        | 67 | 4.5 | A | 3 |
| 75212000 | 3000_Vegetables | Cabbage, red, cooked, NS as to fat added in cooking                                         | 67 | 4   | B | 4 |
| 75212020 | 3000_Vegetables | Cabbage, red, cooked, fat added in cooking, NS as to type of fat                            | 67 | 4   | B | 4 |
| 75143200 | 3000_Vegetables | Lettuce, salad with cheese, tomato and/or carrots, with or without other vegetables, no d   | 67 | 4.5 | B | 4 |
| 75221023 | 3000_Vegetables | Onions, cooked, from frozen, made with oil                                                  | 67 | 4.5 | B | 4 |
| 73201003 | 3000_Vegetables | Pumpkin, cooked, from canned, NS as to fat added in cooking                                 | 67 | 4.5 | A | 4 |
| 73201023 | 3000_Vegetables | Pumpkin, cooked, from canned, fat added in cooking, NS as to type of fat                    | 67 | 4.5 | A | 4 |
| 75302059 | 3000_Vegetables | Beans, string, green, with pinto beans, cooked, NS as to fat added in cooking               | 67 | 4.5 | A | 4 |
| 75302061 | 3000_Vegetables | Beans, string, green, with pinto beans, cooked, fat added in cooking                        | 67 | 4.5 | A | 4 |
| 75209031 | 3000_Vegetables | Brussels sprouts, cooked, NS as to form, made with butter                                   | 67 | 4.5 | A | 4 |
| 75209051 | 3000_Vegetables | Brussels sprouts, cooked, from frozen, made with butter                                     | 67 | 4.5 | A | 4 |
| 75214001 | 3000_Vegetables | Cauliflower, cooked, from fresh, NS as to fat added in cooking                              | 67 | 4.5 | A | 4 |
| 75214021 | 3000_Vegetables | Cauliflower, cooked, from fresh, fat added in cooking, NS as to type of fat                 | 67 | 4.5 | A | 4 |
| 75218499 | 3000_Vegetables | Lotus root, cooked, NS as to fat added in cooking                                           | 67 | 4.5 | B | 4 |
| 75233001 | 3000_Vegetables | Squash, summer, yellow or green, cooked, from fresh, NS as to fat added in cooking          | 66 | 4.5 | B | 4 |
| 75233021 | 3000_Vegetables | Squash, summer, yellow or green, cooked, from fresh, fat added in cooking, NS as to type    | 66 | 4.5 | B | 4 |
| 75330140 | 3000_Vegetables | Vegetable combination, excluding carrots, broccoli, and dark-green leafy; cooked, no sauc   | 66 | 4.5 | A | 3 |
| 73421000 | 3000_Vegetables | Sweet potato, yellow, Puerto Rican, cooked                                                  | 66 | 4   | B | 3 |
| 75317013 | 3000_Vegetables | Vegetables, stew type, cooked, made with margarine                                          | 66 | 4.5 | B | 4 |
| 75208132 | 3000_Vegetables | Beets, cooked, from canned, made with margarine                                             | 66 | 4   | B | 4 |
| 75220049 | 3000_Vegetables | Lettuce, cooked, NS as to fat added in cooking                                              | 66 | 4   | B | 4 |
| 75220051 | 3000_Vegetables | Lettuce, cooked, fat added in cooking                                                       | 66 | 4   | B | 4 |
| 75217023 | 3000_Vegetables | Eggplant, cooked, made with margarine                                                       | 66 | 4   | B | 4 |
| 75233221 | 3000_Vegetables | Squash, spaghetti, cooked, made with oil                                                    | 66 | 4.5 | B | 4 |

Supplementary Table 8. Original (uncorrected) scores for all food items.

|          |                 |                                                                                            |    |     |   |   |
|----------|-----------------|--------------------------------------------------------------------------------------------|----|-----|---|---|
| 75221011 | 3000_Vegetables | Onions, cooked, from fresh, fat not added in cooking                                       | 66 | 4.5 | B | 3 |
| 75223024 | 3000_Vegetables | Peas, cowpeas, field peas, or blackeye peas, not dried, cooked, NS as to form, made with c | 66 | 5   | A | 4 |
| 75223030 | 3000_Vegetables | Peas, cowpeas, field peas, or blackeye peas, not dried, cooked, from frozen, made with oil | 66 | 5   | A | 4 |
| 75302511 | 3000_Vegetables | Beans, string, green, and potatoes, cooked, made with oil                                  | 66 | 4   | A | 4 |
| 75330122 | 3000_Vegetables | Vegetable combination, including carrots, broccoli, and/or dark-green leafy; cooked, no sa | 66 | 4   | B | 4 |
| 75200123 | 3000_Vegetables | Vegetables, NS as to type, cooked, made with margarine                                     | 66 | 5   | A | 4 |
| 75311026 | 3000_Vegetables | Mixed vegetables, cooked, NS as to form, made with margarine                               | 66 | 5   | A | 4 |
| 75311029 | 3000_Vegetables | Mixed vegetables, cooked, from frozen, made with margarine                                 | 66 | 5   | A | 4 |
| 75213022 | 3000_Vegetables | Cabbage, savoy, cooked, made with butter                                                   | 66 | 4.5 | A | 4 |
| 75315218 | 3000_Vegetables | Peas and mushrooms, cooked, made with margarine                                            | 65 | 5   | A | 4 |
| 75315110 | 3000_Vegetables | Peas and onions, cooked, fat not added in cooking                                          | 65 | 4.5 | A | 3 |
| 75315249 | 3000_Vegetables | Cowpeas with snap beans, cooked, NS as to fat added in cooking                             | 65 | 4.5 | A | 4 |
| 75224022 | 3000_Vegetables | Peas, green, cooked, from frozen, fat not added in cooking                                 | 65 | 5   | A | 3 |
| 73420000 | 3000_Vegetables | Sweet potato tots, NFS                                                                     | 65 | 4   | C | 4 |
| 75223013 | 3000_Vegetables | Peas, cowpeas, field peas, or blackeye peas, not dried, cooked, from canned, fat not add   | 65 | 5   | A | 3 |
| 75224020 | 3000_Vegetables | Peas, green, cooked, NS as to form, fat not added in cooking                               | 65 | 5   | A | 3 |
| 75221017 | 3000_Vegetables | Onions, cooked, from fresh, made with oil                                                  | 65 | 4.5 | B | 4 |
| 75315300 | 3000_Vegetables | Peas and potatoes, cooked, fat not added in cooking                                        | 65 | 4.5 | A | 3 |
| 71900100 | 3000_Vegetables | Plantain, boiled, NS as to green or ripe                                                   | 65 | 4   | B | 1 |
| 71901010 | 3000_Vegetables | Green plantains, boiled                                                                    | 65 | 4   | B | 1 |
| 75216310 | 3000_Vegetables | Corn, yellow, canned, low sodium, fat not added in cooking                                 | 65 | 4.5 | A | 3 |
| 75221040 | 3000_Vegetables | Onions, green, cooked, NS as to form, NS as to fat added in cooking                        | 65 | 4.5 | B | 4 |
| 75221041 | 3000_Vegetables | Onions, green, cooked, from fresh, NS as to fat added in cooking                           | 65 | 4.5 | B | 4 |
| 75221060 | 3000_Vegetables | Onions, green, cooked, NS as to form, fat added in cooking                                 | 65 | 4.5 | B | 4 |
| 75204027 | 3000_Vegetables | Beans, lima, immature, cooked, from fresh, made with oil                                   | 64 | 5   | A | 4 |
| 75302029 | 3000_Vegetables | Beans, string, green, with chickpeas, cooked, NS as to fat added in cooking                | 64 | 4.5 | A | 4 |
| 75302031 | 3000_Vegetables | Beans, string, green, with chickpeas, cooked, fat added in cooking                         | 64 | 4.5 | A | 4 |
| 75214034 | 3000_Vegetables | Cauliflower, cooked, from canned, made with butter                                         | 64 | 4.5 | A | 4 |
| 75223027 | 3000_Vegetables | Peas, cowpeas, field peas, or blackeye peas, not dried, cooked, from fresh, made with oil  | 64 | 5   | A | 4 |
| 75208123 | 3000_Vegetables | Beets, cooked, NS as to form, made with margarine                                          | 64 | 4   | B | 4 |
| 75208126 | 3000_Vegetables | Beets, cooked, from fresh, made with margarine                                             | 64 | 4   | B | 4 |
| 75208129 | 3000_Vegetables | Beets, cooked, from frozen, made with margarine                                            | 64 | 4   | B | 4 |
| 73420020 | 3000_Vegetables | Sweet potato tots, from frozen, baked                                                      | 64 | 4   | C | 4 |
| 75221160 | 3000_Vegetables | Palm hearts, cooked, assume fat not added in cooking                                       | 64 | 4   | C | 4 |
| 75222021 | 3000_Vegetables | Parsnips, cooked, made with oil                                                            | 64 | 4.5 | B | 4 |
| 75220025 | 3000_Vegetables | Okra, cooked, NS as to form, made with butter                                              | 64 | 4.5 | B | 4 |
| 75220032 | 3000_Vegetables | Okra, cooked, from frozen, made with butter                                                | 64 | 4.5 | B | 4 |
| 73407050 | 3000_Vegetables | Sweet potato, canned, fat not added in cooking                                             | 64 | 4.5 | B | 3 |
| 75224040 | 3000_Vegetables | Peas, green, cooked, NS as to form, made with oil                                          | 64 | 5   | A | 4 |
| 75224046 | 3000_Vegetables | Peas, green, cooked, from frozen, made with oil                                            | 64 | 5   | A | 4 |
| 75340000 | 3000_Vegetables | Vegetable combinations, Asian style, broccoli, green pepper, water chestnut, etc., cooked  | 64 | 4.5 | B | 4 |
| 75340020 | 3000_Vegetables | Vegetable combinations, Asian style, broccoli, green pepper, water chestnut, etc., cooked  | 64 | 4.5 | B | 4 |
| 75307003 | 3000_Vegetables | Green peppers and onions, cooked, made with margarine                                      | 64 | 4.5 | B | 4 |
| 75233003 | 3000_Vegetables | Squash, summer, yellow or green, cooked, from canned, NS as to fat added in cooking        | 64 | 4.5 | A | 4 |
| 75233023 | 3000_Vegetables | Squash, summer, yellow or green, cooked, from canned, fat added in cooking, NS as to typ   | 64 | 4.5 | A | 4 |
| 75218501 | 3000_Vegetables | Lotus root, cooked, fat added in cooking                                                   | 63 | 4   | C | 4 |
| 75233002 | 3000_Vegetables | Squash, summer, yellow or green, cooked, from frozen, NS as to fat added in cooking        | 63 | 4.5 | B | 4 |
| 75233022 | 3000_Vegetables | Squash, summer, yellow or green, cooked, from frozen, fat added in cooking, NS as to typ   | 63 | 4.5 | B | 4 |
| 75233000 | 3000_Vegetables | Squash, summer, yellow or green, cooked, NS as to form, NS as to fat added in cooking      | 63 | 4.5 | B | 4 |
| 75233020 | 3000_Vegetables | Squash, summer, yellow or green, cooked, NS as to form, fat added in cooking, NS as to ty  | 63 | 4.5 | B | 4 |
| 73102203 | 3000_Vegetables | Carrots, cooked, from canned, NS as to fat added in cooking                                | 63 | 4   | B | 4 |
| 73102223 | 3000_Vegetables | Carrots, cooked, from canned, fat added in cooking, NS as to type of fat                   | 63 | 4   | B | 4 |
| 71961010 | 3000_Vegetables | Celeriac, cooked                                                                           | 63 | 4   | B | 3 |
| 75215100 | 3000_Vegetables | Fennel bulb, cooked, NS as to fat added in cooking                                         | 63 | 4   | B | 4 |
| 75215120 | 3000_Vegetables | Fennel bulb, cooked, fat added in cooking, NS as to type of fat                            | 63 | 4   | B | 4 |
| 75213122 | 3000_Vegetables | Cactus, cooked, made with butter                                                           | 63 | 4   | B | 4 |
| 73301000 | 3000_Vegetables | Squash, winter type, mashed, NS as to fat or sugar added in cooking                        | 63 | 4.5 | A | 4 |
| 73301020 | 3000_Vegetables | Squash, winter type, mashed, fat added in cooking, no sugar added in cooking               | 63 | 4.5 | A | 4 |
| 73303020 | 3000_Vegetables | Squash, winter type, baked, fat added in cooking, no sugar added in cooking, NS as to typ  | 63 | 4.5 | A | 4 |
| 73303000 | 3000_Vegetables | Squash, winter type, baked, NS as to fat or sugar added in cooking                         | 63 | 4.5 | A | 4 |
| 73402000 | 3000_Vegetables | Sweet potato, baked, peel eaten, NS as to fat added in cooking                             | 63 | 4.5 | B | 4 |
| 73402020 | 3000_Vegetables | Sweet potato, baked, peel eaten, fat added in cooking, NS as to type of fat                | 63 | 4.5 | B | 4 |
| 73403000 | 3000_Vegetables | Sweet potato, baked, peel not eaten, NS as to fat added in cooking                         | 63 | 4.5 | B | 4 |
| 73403020 | 3000_Vegetables | Sweet potato, baked, peel not eaten, fat added in cooking, NS as to type of fat            | 63 | 4.5 | B | 4 |
| 75330153 | 3000_Vegetables | Vegetable combination, excluding carrots, broccoli, and dark-green leafy; cooked, no sauc  | 63 | 4.5 | A | 4 |
| 75214023 | 3000_Vegetables | Cauliflower, cooked, from canned, fat added in cooking, NS as to type of fat               | 62 | 4.5 | B | 4 |
| 75222010 | 3000_Vegetables | Parsnips, cooked, fat not added in cooking                                                 | 62 | 4.5 | A | 3 |
| 73201034 | 3000_Vegetables | Pumpkin, cooked, from canned, made with butter                                             | 62 | 4.5 | A | 4 |
| 75315311 | 3000_Vegetables | Peas and potatoes, cooked, made with oil                                                   | 62 | 4.5 | A | 4 |
| 75206001 | 3000_Vegetables | Beans, string, yellow, cooked, from fresh, NS as to fat added in cooking                   | 62 | 4.5 | A | 4 |
| 75206021 | 3000_Vegetables | Beans, string, yellow, cooked, from fresh, fat added in cooking, NS as to type of fat      | 62 | 4.5 | A | 4 |
| 73410310 | 3000_Vegetables | Sweet potato fries, frozen, fried                                                          | 62 | 4.5 | B | 4 |
| 75223026 | 3000_Vegetables | Peas, cowpeas, field peas, or blackeye peas, not dried, cooked, NS as to form, made with r | 62 | 5   | A | 4 |
| 73303040 | 3000_Vegetables | Squash, winter type, baked, no fat added in cooking, sugar added in cooking                | 62 | 4.5 | B | 3 |
| 75340022 | 3000_Vegetables | Vegetable combinations, Asian style, broccoli, green pepper, water chestnut, etc., cooked  | 62 | 4.5 | B | 4 |
| 73405023 | 3000_Vegetables | Sweet potato, boiled, made with margarine                                                  | 62 | 4   | B | 4 |
| 75221016 | 3000_Vegetables | Onions, cooked, NS as to form, made with margarine                                         | 62 | 4.5 | B | 4 |
| 75214028 | 3000_Vegetables | Cauliflower, cooked, from fresh, made with butter                                          | 62 | 4.5 | A | 4 |
| 73201025 | 3000_Vegetables | Pumpkin, cooked, NS as to form, made with butter                                           | 62 | 4.5 | B | 4 |
| 73201028 | 3000_Vegetables | Pumpkin, cooked, from fresh, made with butter                                              | 62 | 4.5 | B | 4 |
| 73201031 | 3000_Vegetables | Pumpkin, cooked, from frozen, made with butter                                             | 62 | 4.5 | B | 4 |
| 75223032 | 3000_Vegetables | Peas, cowpeas, field peas, or blackeye peas, not dried, cooked, from frozen, made with m   | 61 | 5   | A | 4 |
| 75231027 | 3000_Vegetables | Snowpea, cooked, from fresh, made with butter                                              | 61 | 4.5 | A | 4 |
| 75224023 | 3000_Vegetables | Peas, green, cooked, from canned, fat not added in cooking                                 | 61 | 5   | A | 3 |
| 75233223 | 3000_Vegetables | Squash, spaghetti, cooked, made with margarine                                             | 61 | 4   | B | 4 |
| 75218500 | 3000_Vegetables | Lotus root, cooked, fat not added in cooking                                               | 61 | 4.5 | B | 3 |



Supplementary Table 8. Original (uncorrected) scores for all food items.

|          |                 |                                                                                              |    |     |   |   |
|----------|-----------------|----------------------------------------------------------------------------------------------|----|-----|---|---|
| 75221025 | 3000_Vegetables | Onions, cooked, from frozen, made with margarine                                             | 61 | 4.5 | B | 4 |
| 75315010 | 3000_Vegetables | Peas and corn, cooked, fat not added in cooking                                              | 61 | 4.5 | A | 3 |
| 75211010 | 3000_Vegetables | Cabbage, green, cooked, NS as to fat added in cooking                                        | 61 | 4   | B | 4 |
| 75211030 | 3000_Vegetables | Cabbage, green, cooked, fat added in cooking, NS as to type of fat                           | 61 | 4   | B | 4 |
| 75316020 | 3000_Vegetables | Squash, summer, yellow or green, and onions, cooked, fat added in cooking                    | 60 | 4.5 | B | 4 |
| 74504100 | 3000_Vegetables | Tomato and onion, cooked, NS as to fat added in cooking                                      | 60 | 4   | B | 4 |
| 74504120 | 3000_Vegetables | Tomato and onion, cooked, fat added in cooking, NS as to type of fat                         | 60 | 4   | B | 4 |
| 73102202 | 3000_Vegetables | Carrots, cooked, from frozen, NS as to fat added in cooking                                  | 60 | 4.5 | B | 4 |
| 73102222 | 3000_Vegetables | Carrots, cooked, from frozen, fat added in cooking, NS as to type of fat                     | 60 | 4.5 | B | 4 |
| 75223033 | 3000_Vegetables | Peas, cowpeas, field peas, or blackeye peas, not dried, cooked, from canned, made with o     | 60 | 5   | A | 4 |
| 75215509 | 3000_Vegetables | Christophine, cooked, NS as to fat added in cooking                                          | 60 | 4.5 | A | 4 |
| 75215511 | 3000_Vegetables | Christophine, cooked, fat added in cooking                                                   | 60 | 4.5 | A | 4 |
| 73102200 | 3000_Vegetables | Carrots, cooked, NS as to form, NS as to fat added in cooking                                | 60 | 4.5 | B | 4 |
| 73102220 | 3000_Vegetables | Carrots, cooked, NS as to form, fat added in cooking, NS as to type of fat                   | 60 | 4.5 | B | 4 |
| 73102201 | 3000_Vegetables | Carrots, cooked, from fresh, NS as to fat added in cooking                                   | 60 | 4.5 | B | 4 |
| 73102221 | 3000_Vegetables | Carrots, cooked, from fresh, fat added in cooking, NS as to type of fat                      | 60 | 4.5 | B | 4 |
| 75218009 | 3000_Vegetables | Kohlrabi, cooked, NS as to fat added in cooking                                              | 60 | 4.5 | B | 4 |
| 75218011 | 3000_Vegetables | Kohlrabi, cooked, fat added in cooking                                                       | 60 | 4.5 | B | 4 |
| 75204029 | 3000_Vegetables | Beans, lima, immature, cooked, from fresh, made with margarine                               | 60 | 5   | A | 4 |
| 75503080 | 3000_Vegetables | Eggplant, pickled                                                                            | 60 | 3.5 | C | 3 |
| 71103125 | 3000_Vegetables | Potato, boiled, from fresh, peel eaten, fat not added in cooking                             | 60 | 4.5 | A | 3 |
| 71104050 | 3000_Vegetables | Potato, roasted, from fresh, peel eaten, fat not added in cooking                            | 60 | 4.5 | A | 3 |
| 75233028 | 3000_Vegetables | Squash, summer, yellow or green, cooked, from fresh, made with butter                        | 60 | 4   | B | 4 |
| 71704000 | 3000_Vegetables | Stewed potatoes with tomatoes                                                                | 60 | 4.5 | B | 4 |
| 75224042 | 3000_Vegetables | Peas, green, cooked, NS as to form, made with margarine                                      | 60 | 5   | A | 4 |
| 75224048 | 3000_Vegetables | Peas, green, cooked, from frozen, made with margarine                                        | 60 | 5   | A | 4 |
| 75302513 | 3000_Vegetables | Beans, string, green, and potatoes, cooked, made with margarine                              | 60 | 4.5 | A | 4 |
| 75224110 | 3000_Vegetables | Peas, green, canned, low sodium, NS as to fat added in cooking                               | 60 | 5   | A | 4 |
| 75224130 | 3000_Vegetables | Peas, green, canned, low sodium, fat added in cooking, NS as to type of fat                  | 59 | 5   | A | 4 |
| 75315021 | 3000_Vegetables | Peas and corn, cooked, made with oil                                                         | 59 | 4.5 | A | 4 |
| 75215040 | 3000_Vegetables | Celery, cooked, made with butter                                                             | 59 | 4   | B | 4 |
| 71980100 | 3000_Vegetables | Poi                                                                                          | 59 | 4.5 | B | 1 |
| 75204980 | 3000_Vegetables | Beans, string, cooked, NS as to form, NS as to color, fat added in cooking, NS as to type of | 59 | 4.5 | A | 4 |
| 75205000 | 3000_Vegetables | Beans, string, cooked, NS as to form, NS as to color, NS as to fat added in cooking          | 59 | 4.5 | A | 4 |
| 75205010 | 3000_Vegetables | Beans, string, green, cooked, NS as to form, NS as to fat added in cooking                   | 59 | 4.5 | A | 4 |
| 75205030 | 3000_Vegetables | Beans, string, green, cooked, NS as to form, fat added in cooking, NS as to type of fat      | 59 | 4.5 | A | 4 |
| 75221019 | 3000_Vegetables | Onions, cooked, from fresh, made with margarine                                              | 59 | 4.5 | B | 4 |
| 75222023 | 3000_Vegetables | Parsnips, cooked, made with margarine                                                        | 59 | 4.5 | B | 4 |
| 71508001 | 3000_Vegetables | Potato, baked, peel eaten                                                                    | 59 | 4.5 | A | 3 |
| 71103135 | 3000_Vegetables | Potato, boiled, from fresh, peel eaten, made with oil                                        | 59 | 4.5 | A | 4 |
| 71104070 | 3000_Vegetables | Potato, roasted, from fresh, peel eaten, made with oil                                       | 59 | 4.5 | A | 4 |
| 75231024 | 3000_Vegetables | Snowpea, cooked, NS as to form, made with butter                                             | 59 | 4.5 | A | 4 |
| 75231030 | 3000_Vegetables | Snowpea, cooked, from frozen, made with butter                                               | 59 | 4.5 | A | 4 |
| 75204983 | 3000_Vegetables | Beans, string, cooked, from canned, NS as to color, fat added in cooking, NS as to type of f | 59 | 4   | B | 4 |
| 75205003 | 3000_Vegetables | Beans, string, cooked, from canned, NS as to color, NS as to fat added in cooking            | 59 | 4   | B | 4 |
| 75315999 | 3000_Vegetables | Squash, summer, yellow or green, and onions, cooked, NS as to fat added in cooking           | 59 | 4.5 | B | 4 |
| 75205013 | 3000_Vegetables | Beans, string, green, cooked, from canned, NS as to fat added in cooking                     | 59 | 4   | B | 4 |
| 75205033 | 3000_Vegetables | Beans, string, green, cooked, from canned, fat added in cooking, NS as to type of fat        | 59 | 4   | B | 4 |
| 75201000 | 3000_Vegetables | Artichoke, cooked, NS as to form, NS as to fat added in cooking                              | 59 | 4.5 | A | 4 |
| 75201002 | 3000_Vegetables | Artichoke, cooked, from frozen, NS as to fat added in cooking                                | 59 | 4.5 | A | 4 |
| 75201003 | 3000_Vegetables | Artichoke, cooked, from canned, NS as to fat added in cooking                                | 59 | 4.5 | A | 4 |
| 75201020 | 3000_Vegetables | Artichoke, cooked, NS as to form, fat added in cooking, NS as to type of fat                 | 59 | 4.5 | A | 4 |
| 75201022 | 3000_Vegetables | Artichoke, cooked, from frozen, fat added in cooking, NS as to type of fat                   | 59 | 4.5 | A | 4 |
| 75201023 | 3000_Vegetables | Artichoke, cooked, from canned, fat added in cooking, NS as to type of fat                   | 59 | 4.5 | A | 4 |
| 73420010 | 3000_Vegetables | Sweet potato tots, from frozen, fried                                                        | 58 | 4   | C | 4 |
| 73420030 | 3000_Vegetables | Sweet potato tots, from frozen, NS as to fried or baked                                      | 58 | 4   | C | 4 |
| 75223029 | 3000_Vegetables | Peas, cowpeas, field peas, or blackeye peas, not dried, cooked, from fresh, made with mar    | 58 | 5   | A | 4 |
| 75226040 | 3000_Vegetables | Peppers, red, cooked, NS as to fat added in cooking                                          | 58 | 4   | B | 4 |
| 75226060 | 3000_Vegetables | Peppers, red, cooked, fat added in cooking, NS as to type of fat                             | 58 | 4   | B | 4 |
| 75212022 | 3000_Vegetables | Cabbage, red, cooked, made with butter                                                       | 58 | 4   | B | 4 |
| 73111201 | 3000_Vegetables | Peas and carrots, cooked, from fresh, NS as to fat added in cooking                          | 58 | 4.5 | A | 4 |
| 73111221 | 3000_Vegetables | Peas and carrots, cooked, from fresh, fat added in cooking, NS as to type of fat             | 58 | 4.5 | A | 4 |
| 75206010 | 3000_Vegetables | Beans, string, yellow, cooked, NS as to form, fat not added in cooking                       | 58 | 4.5 | A | 4 |
| 75224049 | 3000_Vegetables | Peas, green, cooked, from canned, made with oil                                              | 58 | 5   | A | 4 |
| 75206000 | 3000_Vegetables | Beans, string, yellow, cooked, NS as to form, NS as to fat added in cooking                  | 58 | 4.5 | A | 4 |
| 75206020 | 3000_Vegetables | Beans, string, yellow, cooked, NS as to form, fat added in cooking, NS as to type of fat     | 58 | 4.5 | A | 4 |
| 75204010 | 3000_Vegetables | Beans, lima, immature, cooked, NS as to form, fat not added in cooking                       | 58 | 5   | A | 3 |
| 75204013 | 3000_Vegetables | Beans, lima, immature, cooked, from canned, fat not added in cooking                         | 58 | 5   | A | 3 |
| 75204012 | 3000_Vegetables | Beans, lima, immature, cooked, from frozen, fat not added in cooking                         | 58 | 5   | A | 3 |
| 75303010 | 3000_Vegetables | Corn with peppers, red or green, cooked, fat not added in cooking                            | 58 | 4.5 | B | 3 |
| 75201001 | 3000_Vegetables | Artichoke, cooked, from fresh, NS as to fat added in cooking                                 | 58 | 5   | A | 4 |
| 75201021 | 3000_Vegetables | Artichoke, cooked, from fresh, fat added in cooking, NS as to type of fat                    | 58 | 5   | A | 4 |
| 75204982 | 3000_Vegetables | Beans, string, cooked, from frozen, NS as to color, fat added in cooking, NS as to type of f | 58 | 4.5 | A | 4 |
| 75205002 | 3000_Vegetables | Beans, string, cooked, from frozen, NS as to color, NS as to fat added in cooking            | 58 | 4.5 | A | 4 |
| 75205012 | 3000_Vegetables | Beans, string, green, cooked, from frozen, NS as to fat added in cooking                     | 58 | 4.5 | A | 4 |
| 75205032 | 3000_Vegetables | Beans, string, green, cooked, from frozen, fat added in cooking, NS as to type of fat        | 58 | 4.5 | A | 4 |
| 75215122 | 3000_Vegetables | Fennel bulb, cooked, made with butter                                                        | 58 | 4   | B | 4 |
| 71603010 | 3000_Vegetables | Potato salad, made with mayonnaise                                                           | 58 | 4   | B | 4 |
| 75233025 | 3000_Vegetables | Squash, summer, yellow or green, cooked, NS as to form, made with butter                     | 57 | 4   | B | 4 |
| 71603030 | 3000_Vegetables | Potato salad, made with creamy dressing                                                      | 57 | 4   | B | 4 |
| 75225010 | 3000_Vegetables | Pigeon peas, cooked, NS as to form, fat not added in cooking                                 | 57 | 5   | A | 4 |
| 75225011 | 3000_Vegetables | Pigeon peas, cooked, from fresh, fat not added in cooking                                    | 57 | 5   | A | 4 |
| 75225013 | 3000_Vegetables | Pigeon peas, cooked, from canned, fat not added in cooking                                   | 57 | 5   | A | 4 |
| 75206002 | 3000_Vegetables | Beans, string, yellow, cooked, from frozen, NS as to fat added in cooking                    | 57 | 4.5 | A | 4 |
| 75206022 | 3000_Vegetables | Beans, string, yellow, cooked, from frozen, fat added in cooking, NS as to type of fat       | 57 | 4.5 | A | 4 |
| 71103010 | 3000_Vegetables | Potato, boiled, from fresh, peel not eaten, fat not added in cooking                         | 57 | 4.5 | A | 3 |

Supplementary Table 8. Original (uncorrected) scores for all food items.

|          |                 |                                                                                               |    |     |   |   |
|----------|-----------------|-----------------------------------------------------------------------------------------------|----|-----|---|---|
| 71103030 | 3000_Vegetables | Potato, boiled, from fresh, peel not eaten, made with oil                                     | 57 | 4.5 | B | 4 |
| 71104130 | 3000_Vegetables | Potato, roasted, from fresh, peel not eaten, made with oil                                    | 57 | 4.5 | B | 4 |
| 71104120 | 3000_Vegetables | Potato, roasted, from fresh, peel not eaten, fat not added in cooking                         | 57 | 4.5 | A | 3 |
| 73303022 | 3000_Vegetables | Squash, winter type, baked, no sugar added in cooking, made with butter                       | 57 | 4.5 | B | 4 |
| 75211032 | 3000_Vegetables | Cabbage, green, cooked, made with butter                                                      | 57 | 4   | B | 4 |
| 75315123 | 3000_Vegetables | Peas and onions, cooked, made with margarine                                                  | 57 | 4.5 | A | 4 |
| 73111200 | 3000_Vegetables | Peas and carrots, cooked, NS as to form, NS as to fat added in cooking                        | 57 | 4.5 | A | 4 |
| 73111202 | 3000_Vegetables | Peas and carrots, cooked, from frozen, NS as to fat added in cooking                          | 57 | 4.5 | A | 4 |
| 73111220 | 3000_Vegetables | Peas and carrots, cooked, NS as to form, fat added in cooking, NS as to type of fat           | 57 | 4.5 | A | 4 |
| 73111222 | 3000_Vegetables | Peas and carrots, cooked, from frozen, fat added in cooking, NS as to type of fat             | 57 | 4.5 | A | 4 |
| 71910310 | 3000_Vegetables | Pickled green bananas, Puerto Rican style                                                     | 57 | 3.5 | C | 4 |
| 73420100 | 3000_Vegetables | Sweet potato tots, fast food / restaurant                                                     | 57 | 4   | C | 4 |
| 75206034 | 3000_Vegetables | Beans, string, yellow, cooked, from fresh, made with butter                                   | 57 | 4.5 | A | 4 |
| 75315313 | 3000_Vegetables | Peas and potatoes, cooked, made with margarine                                                | 57 | 4.5 | A | 4 |
| 71910210 | 3000_Vegetables | Green banana, fried                                                                           | 57 | 4   | B | 4 |
| 71101000 | 3000_Vegetables | Potato, baked, peel not eaten                                                                 | 56 | 4.5 | B | 3 |
| 75201032 | 3000_Vegetables | Artichoke, cooked, NS as to form, made with butter                                            | 56 | 5   | A | 4 |
| 75201035 | 3000_Vegetables | Artichoke, cooked, from fresh, made with butter                                               | 56 | 5   | A | 4 |
| 71100100 | 3000_Vegetables | Potato, baked, NFS                                                                            | 56 | 4.5 | B | 3 |
| 75201038 | 3000_Vegetables | Artichoke, cooked, from canned, made with butter                                              | 56 | 4.5 | A | 4 |
| 75201041 | 3000_Vegetables | Artichoke, cooked, from frozen, made with butter                                              | 56 | 4.5 | A | 4 |
| 75233031 | 3000_Vegetables | Squash, summer, yellow or green, cooked, from frozen, made with butter                        | 56 | 4   | B | 4 |
| 75204981 | 3000_Vegetables | Beans, string, cooked, from fresh, NS as to color, fat added in cooking, NS as to type of fat | 56 | 4.5 | A | 4 |
| 75205001 | 3000_Vegetables | Beans, string, cooked, from fresh, NS as to color, NS as to fat added in cooking              | 56 | 4.5 | A | 4 |
| 75205011 | 3000_Vegetables | Beans, string, green, cooked, from fresh, NS as to fat added in cooking                       | 56 | 4.5 | A | 4 |
| 75205031 | 3000_Vegetables | Beans, string, green, cooked, from fresh, fat added in cooking, NS as to type of fat          | 56 | 4.5 | A | 4 |
| 71950010 | 3000_Vegetables | Tannier, cooked                                                                               | 56 | 5   | A | 3 |
| 71905110 | 3000_Vegetables | Fried ripe plantain, Puerto Rican style                                                       | 56 | 4   | C | 4 |
| 75223035 | 3000_Vegetables | Peas, cowpeas, field peas, or blackeye peas, not dried, cooked, from canned, made with r      | 56 | 5   | A | 4 |
| 71703990 | 3000_Vegetables | Stewed potatoes                                                                               | 56 | 4.5 | B | 4 |
| 75206003 | 3000_Vegetables | Beans, string, yellow, cooked, from canned, NS as to fat added in cooking                     | 56 | 4   | C | 4 |
| 75206023 | 3000_Vegetables | Beans, string, yellow, cooked, from canned, fat added in cooking, NS as to type of fat        | 56 | 4   | C | 4 |
| 71401010 | 3000_Vegetables | Potato, french fries, from fresh, fried                                                       | 55 | 4   | B | 4 |
| 75233034 | 3000_Vegetables | Squash, summer, yellow or green, cooked, from canned, made with butter                        | 55 | 4   | B | 4 |
| 75208100 | 3000_Vegetables | Beets, canned, low sodium, NS as to fat added in cooking                                      | 55 | 4.5 | B | 4 |
| 75208120 | 3000_Vegetables | Beets, canned, low sodium, fat added in cooking, NS as to type of fat                         | 55 | 4.5 | B | 4 |
| 75226000 | 3000_Vegetables | Peppers, green, cooked, NS as to fat added in cooking                                         | 55 | 4   | B | 4 |
| 75226020 | 3000_Vegetables | Peppers, green, cooked, fat added in cooking, NS as to type of fat                            | 55 | 4   | B | 4 |
| 75534030 | 3000_Vegetables | Turnip, pickled                                                                               | 55 | 4   | B | 3 |
| 74505000 | 3000_Vegetables | Tomato with corn and okra, cooked, NS as to fat added in cooking                              | 55 | 4.5 | A | 4 |
| 74505020 | 3000_Vegetables | Tomato with corn and okra, cooked, fat added in cooking, NS as to type of fat                 | 55 | 4.5 | A | 4 |
| 75311003 | 3000_Vegetables | Mixed vegetables, cooked, from canned, NS as to fat added in cooking                          | 55 | 4.5 | A | 4 |
| 75311023 | 3000_Vegetables | Mixed vegetables, cooked, from canned, fat added in cooking, NS as to type of fat             | 55 | 4.5 | A | 4 |
| 73405000 | 3000_Vegetables | Sweet potato, boiled, NS as to fat added in cooking                                           | 55 | 4   | B | 4 |
| 73405020 | 3000_Vegetables | Sweet potato, boiled, fat added in cooking, NS as to type of fat                              | 55 | 4   | B | 4 |
| 73401000 | 3000_Vegetables | Sweet potato, NFS                                                                             | 55 | 4   | B | 4 |
| 75224132 | 3000_Vegetables | Peas, green, canned, low sodium, made with butter                                             | 55 | 5   | A | 4 |
| 75204024 | 3000_Vegetables | Beans, lima, immature, cooked, NS as to form, made with oil                                   | 55 | 5   | A | 4 |
| 75204030 | 3000_Vegetables | Beans, lima, immature, cooked, from frozen, made with oil                                     | 55 | 5   | A | 4 |
| 75204033 | 3000_Vegetables | Beans, lima, immature, cooked, from canned, made with oil                                     | 55 | 5   | A | 4 |
| 75315023 | 3000_Vegetables | Peas and corn, cooked, made with margarine                                                    | 55 | 4.5 | A | 4 |
| 75302200 | 3000_Vegetables | Beans, string, green, with onions, NS as to fat added in cooking                              | 55 | 4.5 | B | 4 |
| 75302210 | 3000_Vegetables | Beans, string, green, with onions, cooked, fat added in cooking, NS as to type of fat         | 55 | 4.5 | B | 4 |
| 75234000 | 3000_Vegetables | Turnip, cooked, NS as to form, NS as to fat added in cooking                                  | 55 | 4   | B | 4 |
| 75234003 | 3000_Vegetables | Turnip, cooked, from canned, NS as to fat added in cooking                                    | 55 | 4   | B | 4 |
| 75229010 | 3000_Vegetables | Salsify, cooked, fat not added in cooking                                                     | 55 | 4.5 | A | 3 |
| 71103320 | 3000_Vegetables | Potato, canned, fat not added in cooking                                                      | 55 | 4.5 | A | 3 |
| 75234002 | 3000_Vegetables | Turnip, cooked, from frozen, NS as to fat added in cooking                                    | 55 | 4   | B | 4 |
| 75234020 | 3000_Vegetables | Turnip, cooked, NS as to form, fat added in cooking, NS as to type of fat                     | 55 | 4   | B | 4 |
| 75234022 | 3000_Vegetables | Turnip, cooked, from frozen, fat added in cooking, NS as to type of fat                       | 55 | 4   | B | 4 |
| 75228000 | 3000_Vegetables | Rutabaga, cooked, NS as to fat added in cooking                                               | 55 | 4.5 | B | 4 |
| 75228020 | 3000_Vegetables | Rutabaga, cooked, fat added in cooking, NS as to type of fat                                  | 55 | 4.5 | B | 4 |
| 73111225 | 3000_Vegetables | Peas and carrots, cooked, NS as to form, made with butter                                     | 54 | 4.5 | A | 4 |
| 73111228 | 3000_Vegetables | Peas and carrots, cooked, from fresh, made with butter                                        | 54 | 4.5 | A | 4 |
| 73111231 | 3000_Vegetables | Peas and carrots, cooked, from frozen, made with butter                                       | 54 | 4.5 | A | 4 |
| 71962040 | 3000_Vegetables | Taro, baked                                                                                   | 54 | 4.5 | B | 3 |
| 71401015 | 3000_Vegetables | Potato, french fries, from fresh, baked                                                       | 54 | 4   | B | 4 |
| 71401033 | 3000_Vegetables | Potato, french fries, school                                                                  | 54 | 4   | B | 4 |
| 71505020 | 3000_Vegetables | Potato tots, school                                                                           | 54 | 4   | B | 4 |
| 73407060 | 3000_Vegetables | Sweet potato, canned, fat added in cooking                                                    | 54 | 4   | C | 4 |
| 71602950 | 3000_Vegetables | Potato salad, from restaurant                                                                 | 54 | 4   | C | 4 |
| 75208112 | 3000_Vegetables | Beets, canned, low sodium, made with butter                                                   | 54 | 4.5 | B | 4 |
| 75224011 | 3000_Vegetables | Peas, green, cooked, from fresh, NS as to fat added in cooking                                | 54 | 5   | A | 4 |
| 75224031 | 3000_Vegetables | Peas, green, cooked, from fresh, fat added in cooking, NS as to type of fat                   | 54 | 5   | A | 4 |
| 71900200 | 3000_Vegetables | Plantain, fried, NS as to green or ripe                                                       | 54 | 4   | C | 4 |
| 75209499 | 3000_Vegetables | Burdock, cooked, NS as to fat added in cooking                                                | 54 | 4   | B | 4 |
| 75209501 | 3000_Vegetables | Burdock, cooked, fat added in cooking                                                         | 54 | 4   | B | 4 |
| 71962010 | 3000_Vegetables | Dasheen, boiled                                                                               | 53 | 4.5 | A | 3 |
| 73102218 | 3000_Vegetables | Carrots, cooked, from fresh, made with butter                                                 | 53 | 4.5 | B | 4 |
| 75311031 | 3000_Vegetables | Mixed vegetables, cooked, from canned, made with butter                                       | 53 | 4.5 | A | 4 |
| 73102228 | 3000_Vegetables | Carrots, cooked, from canned, made with butter                                                | 53 | 4   | B | 4 |
| 71403500 | 3000_Vegetables | Potato, home fries, with vegetables                                                           | 53 | 4   | C | 4 |
| 75216011 | 3000_Vegetables | Corn, cooked, from fresh, NS as to color, fat not added in cooking                            | 53 | 4.5 | A | 3 |
| 75216111 | 3000_Vegetables | Corn, yellow, cooked, from fresh, fat not added in cooking                                    | 53 | 4.5 | A | 3 |
| 73410400 | 3000_Vegetables | Sweet potato fries, fast food / restaurant                                                    | 53 | 3.5 | C | 4 |
| 75219040 | 3000_Vegetables | Mushrooms, cooked, from canned, made with butter                                              | 53 | 4   | C | 4 |

Supplementary Table 8. Original (uncorrected) scores for all food items.

|          |                 |                                                                                             |    |     |   |   |
|----------|-----------------|---------------------------------------------------------------------------------------------|----|-----|---|---|
| 75216171 | 3000_Vegetables | Corn, yellow and white, cooked, from fresh, fat not added in cooking                        | 53 | 4.5 | A | 3 |
| 73407000 | 3000_Vegetables | Sweet potato, canned, NS as to fat added in cooking                                         | 53 | 4   | C | 4 |
| 75216235 | 3000_Vegetables | Corn, white, cooked, from canned, made with oil                                             | 53 | 4.5 | B | 3 |
| 75224051 | 3000_Vegetables | Peas, green, cooked, from canned, made with margarine                                       | 53 | 4   | A | 4 |
| 71945010 | 3000_Vegetables | Yam, cooked, Puerto Rican                                                                   | 53 | 4.5 | A | 3 |
| 75233200 | 3000_Vegetables | Squash, spaghetti, cooked, NS as to fat added in cooking                                    | 52 | 4.5 | A | 4 |
| 71404050 | 3000_Vegetables | Potato, hash brown, from school lunch                                                       | 52 | 4   | A | 4 |
| 75316023 | 3000_Vegetables | Squash, summer, yellow or green, and onions, cooked, made with butter                       | 52 | 4   | B | 4 |
| 75208500 | 3000_Vegetables | Breadfruit, cooked, fat not added in cooking                                                | 52 | 4.5 | B | 3 |
| 75303021 | 3000_Vegetables | Corn with peppers, red or green, cooked, made with oil                                      | 52 | 4.5 | B | 4 |
| 73102215 | 3000_Vegetables | Carrots, cooked, NS as to form, made with butter                                            | 52 | 4.5 | B | 4 |
| 73102225 | 3000_Vegetables | Carrots, cooked, from frozen, made with butter                                              | 52 | 4.5 | B | 4 |
| 71601030 | 3000_Vegetables | Potato salad with egg, made with creamy dressing                                            | 52 | 4   | B | 4 |
| 71106010 | 3000_Vegetables | Potato only from Puerto Rican mixed dishes, gravy and other components reported separ       | 52 | 4.5 | B | 3 |
| 75216323 | 3000_Vegetables | Corn, yellow, canned, low sodium, made with margarine                                       | 52 | 4.5 | A | 4 |
| 71403040 | 3000_Vegetables | Potato, home fries, from fresh                                                              | 51 | 4   | C | 4 |
| 71905120 | 3000_Vegetables | Plantain, ripe, rolled in flour, fried                                                      | 51 | 4   | C | 4 |
| 71403020 | 3000_Vegetables | Potato, home fries, NFS                                                                     | 51 | 4   | C | 4 |
| 71403050 | 3000_Vegetables | Potato, home fries, ready-to-heat                                                           | 51 | 4   | C | 4 |
| 75226062 | 3000_Vegetables | Peppers, red, cooked, made with butter                                                      | 51 | 4   | B | 4 |
| 71405010 | 3000_Vegetables | Potato, hash brown, from fresh                                                              | 51 | 4   | C | 4 |
| 71103150 | 3000_Vegetables | Potato, boiled, from fresh, peel eaten, made with margarine                                 | 51 | 4.5 | B | 4 |
| 71104090 | 3000_Vegetables | Potato, roasted, from fresh, peel eaten, made with margarine                                | 51 | 4.5 | B | 4 |
| 75223002 | 3000_Vegetables | Peas, cowpeas, field peas, or blackeye peas, not dried, cooked, from frozen, NS as to fat a | 51 | 5   | A | 4 |
| 75223022 | 3000_Vegetables | Peas, cowpeas, field peas, or blackeye peas, not dried, cooked, from frozen, fat added in c | 51 | 5   | A | 4 |
| 75234001 | 3000_Vegetables | Turnip, cooked, from fresh, NS as to fat added in cooking                                   | 51 | 4   | B | 4 |
| 75234021 | 3000_Vegetables | Turnip, cooked, from fresh, fat added in cooking, NS as to type of fat                      | 51 | 4   | B | 4 |
| 75234023 | 3000_Vegetables | Turnip, cooked, from canned, fat added in cooking, NS as to type of fat                     | 51 | 4   | B | 4 |
| 71600950 | 3000_Vegetables | Potato salad with egg, from restaurant                                                      | 51 | 4   | C | 4 |
| 75515010 | 3000_Vegetables | Vegetable relish                                                                            | 50 | 4   | C | 3 |
| 75223001 | 3000_Vegetables | Peas, cowpeas, field peas, or blackeye peas, not dried, cooked, from fresh, NS as to fat ad | 50 | 5   | A | 4 |
| 75204961 | 3000_Vegetables | Beans, string, cooked, NS as to form, NS as to color, made with butter                      | 50 | 4.5 | A | 4 |
| 75205042 | 3000_Vegetables | Beans, string, green, cooked, NS as to form, made with butter                               | 50 | 4.5 | A | 4 |
| 75301110 | 3000_Vegetables | Beans, lima and corn, cooked, fat not added in cooking                                      | 50 | 4.5 | A | 3 |
| 75223000 | 3000_Vegetables | Peas, cowpeas, field peas, or blackeye peas, not dried, cooked, NS as to form, NS as to fat | 50 | 5   | A | 4 |
| 75223020 | 3000_Vegetables | Peas, cowpeas, field peas, or blackeye peas, not dried, cooked, NS as to form, fat added in | 50 | 5   | A | 4 |
| 74205011 | 3000_Vegetables | Tomatoes, green, cooked, from fresh                                                         | 50 | 4   | C | 4 |
| 74504122 | 3000_Vegetables | Tomato and onion, cooked, made with butter                                                  | 50 | 4   | B | 4 |
| 75206031 | 3000_Vegetables | Beans, string, yellow, cooked, NS as to form, made with butter                              | 50 | 4.5 | A | 4 |
| 75204026 | 3000_Vegetables | Beans, lima, immature, cooked, NS as to form, made with margarine                           | 50 | 5   | A | 4 |
| 75204032 | 3000_Vegetables | Beans, lima, immature, cooked, from frozen, made with margarine                             | 50 | 5   | A | 4 |
| 75204035 | 3000_Vegetables | Beans, lima, immature, cooked, from canned, made with margarine                             | 50 | 5   | A | 4 |
| 75307000 | 3000_Vegetables | Green peppers and onions, cooked, fat added in cooking, NS as to type of fat                | 50 | 4.5 | B | 4 |
| 74505022 | 3000_Vegetables | Tomato with corn and okra, cooked, made with butter                                         | 50 | 4   | B | 4 |
| 75204970 | 3000_Vegetables | Beans, string, cooked, from canned, NS as to color, made with butter                        | 50 | 4   | B | 4 |
| 75205051 | 3000_Vegetables | Beans, string, green, cooked, from canned, made with butter                                 | 50 | 4   | B | 4 |
| 71603015 | 3000_Vegetables | Potato salad, made with light mayonnaise                                                    | 50 | 4   | B | 4 |
| 71603025 | 3000_Vegetables | Potato salad, made with light mayonnaise-type salad dressing                                | 50 | 4   | B | 4 |
| 75204964 | 3000_Vegetables | Beans, string, cooked, from fresh, NS as to color, made with butter                         | 50 | 4.5 | A | 4 |
| 75205045 | 3000_Vegetables | Beans, string, green, cooked, from fresh, made with butter                                  | 50 | 4.5 | A | 4 |
| 75218400 | 3000_Vegetables | Leek, cooked, NS as to fat added in cooking                                                 | 50 | 4   | C | 4 |
| 75234031 | 3000_Vegetables | Turnip, cooked, from frozen, made with butter                                               | 50 | 4   | B | 4 |
| 75234034 | 3000_Vegetables | Turnip, cooked, NS as to form, made with butter                                             | 50 | 4   | B | 4 |
| 75204967 | 3000_Vegetables | Beans, string, cooked, from frozen, NS as to color, made with butter                        | 49 | 4.5 | A | 4 |
| 75205048 | 3000_Vegetables | Beans, string, green, cooked, from frozen, made with butter                                 | 49 | 4.5 | A | 4 |
| 71103050 | 3000_Vegetables | Potato, boiled, from fresh, peel not eaten, made with margarine                             | 49 | 4.5 | B | 4 |
| 71104150 | 3000_Vegetables | Potato, roasted, from fresh, peel not eaten, made with margarine                            | 49 | 4.5 | B | 4 |
| 75301121 | 3000_Vegetables | Beans, lima and corn, cooked, made with oil                                                 | 49 | 5   | A | 4 |
| 73111203 | 3000_Vegetables | Peas and carrots, cooked, from canned, NS as to fat added in cooking                        | 49 | 4.5 | B | 4 |
| 73111223 | 3000_Vegetables | Peas and carrots, cooked, from canned, fat added in cooking, NS as to type of fat           | 49 | 4.5 | B | 4 |
| 75206037 | 3000_Vegetables | Beans, string, yellow, cooked, from frozen, made with butter                                | 49 | 4.5 | A | 4 |
| 75315200 | 3000_Vegetables | Peas and mushrooms, cooked, NS as to fat added in cooking                                   | 49 | 4.5 | A | 4 |
| 75315215 | 3000_Vegetables | Peas and mushrooms, cooked, fat added in cooking, NS as to type of fat                      | 49 | 4.5 | A | 4 |
| 75224044 | 3000_Vegetables | Peas, green, cooked, from fresh, made with butter                                           | 49 | 5   | A | 4 |
| 75216177 | 3000_Vegetables | Corn, yellow and white, cooked, from fresh, made with oil                                   | 49 | 4.5 | A | 4 |
| 75228022 | 3000_Vegetables | Rutabaga, cooked, made with butter                                                          | 49 | 4   | B | 4 |
| 75225014 | 3000_Vegetables | Pigeon peas, cooked, NS as to form, NS as to fat added in cooking                           | 49 | 5   | A | 4 |
| 75225015 | 3000_Vegetables | Pigeon peas, cooked, NS as to form, fat added in cooking                                    | 49 | 5   | A | 4 |
| 75225016 | 3000_Vegetables | Pigeon peas, cooked, from fresh, NS as to fat added in cooking                              | 49 | 5   | A | 4 |
| 75225017 | 3000_Vegetables | Pigeon peas, cooked, from fresh, fat added in cooking                                       | 49 | 5   | A | 4 |
| 75225018 | 3000_Vegetables | Pigeon peas, cooked, from canned, NS as to fat added in cooking                             | 49 | 5   | A | 4 |
| 75225019 | 3000_Vegetables | Pigeon peas, cooked, from canned, fat added in cooking                                      | 49 | 5   | A | 4 |
| 71910110 | 3000_Vegetables | Green banana, cooked in salt water                                                          | 49 | 4   | B | 3 |
| 75216174 | 3000_Vegetables | Corn, yellow and white, cooked, NS as to form, made with oil                                | 49 | 4.5 | A | 4 |
| 71410000 | 3000_Vegetables | Potato skins without topping                                                                | 49 | 4   | C | 4 |
| 71930190 | 3000_Vegetables | Yuca fries                                                                                  | 49 | 4   | C | 4 |
| 75216024 | 3000_Vegetables | Corn, cooked, NS as to form, NS as to color, made with oil                                  | 49 | 4.5 | A | 4 |
| 75216031 | 3000_Vegetables | Corn, cooked, from frozen, NS as to color, made with oil                                    | 49 | 4.5 | A | 4 |
| 75216131 | 3000_Vegetables | Corn, yellow, cooked, NS as to form, made with oil                                          | 49 | 4.5 | A | 4 |
| 75216137 | 3000_Vegetables | Corn, yellow, cooked, from frozen, made with oil                                            | 49 | 4.5 | A | 4 |
| 71603035 | 3000_Vegetables | Potato salad, made with light creamy dressing                                               | 48 | 4.5 | B | 4 |
| 75216027 | 3000_Vegetables | Corn, cooked, from fresh, NS as to color, made with oil                                     | 48 | 4.5 | A | 4 |
| 75216134 | 3000_Vegetables | Corn, yellow, cooked, from fresh, made with oil                                             | 48 | 4.5 | A | 4 |
| 75226022 | 3000_Vegetables | Peppers, green, cooked, made with butter                                                    | 48 | 4   | B | 4 |
| 71701000 | 3000_Vegetables | Potato pancake                                                                              | 48 | 4   | B | 4 |
| 71401032 | 3000_Vegetables | Potato, french fries, from frozen, fried                                                    | 48 | 4   | C | 4 |

Supplementary Table 8. Original (uncorrected) scores for all food items.

|          |                 |                                                                                             |    |     |   |   |
|----------|-----------------|---------------------------------------------------------------------------------------------|----|-----|---|---|
| 71603040 | 3000_Vegetables | Potato salad, made with Italian dressing                                                    | 48 | 4   | B | 4 |
| 77121110 | 3000_Vegetables | Potato and ham fritters, Puerto Rican style                                                 | 48 | 4   | C | 4 |
| 71970200 | 3000_Vegetables | Fufu                                                                                        | 48 | 4.5 | A | 4 |
| 74503009 | 3000_Vegetables | Tomato and corn, cooked, NS as to fat added in cooking                                      | 48 | 4   | B | 4 |
| 74503011 | 3000_Vegetables | Tomato and corn, cooked, fat added in cooking                                               | 48 | 4   | B | 4 |
| 71404000 | 3000_Vegetables | Potato, hash brown, NFS                                                                     | 48 | 4   | B | 4 |
| 71405040 | 3000_Vegetables | Potato, hash brown, ready-to-heat                                                           | 48 | 4   | B | 4 |
| 75216010 | 3000_Vegetables | Corn, cooked, NS as to form, NS as to color, fat not added in cooking                       | 48 | 4.5 | A | 3 |
| 75216012 | 3000_Vegetables | Corn, cooked, from frozen, NS as to color, fat not added in cooking                         | 48 | 4.5 | A | 3 |
| 75216110 | 3000_Vegetables | Corn, yellow, cooked, NS as to form, fat not added in cooking                               | 48 | 4.5 | A | 3 |
| 75216112 | 3000_Vegetables | Corn, yellow, cooked, from frozen, fat not added in cooking                                 | 48 | 4.5 | A | 3 |
| 73402022 | 3000_Vegetables | Sweet potato, baked, peel eaten, made with butter                                           | 48 | 4   | B | 4 |
| 71405030 | 3000_Vegetables | Potato, hash brown, from dry mix                                                            | 48 | 4   | B | 4 |
| 75206040 | 3000_Vegetables | Beans, string, yellow, cooked, from canned, made with butter                                | 48 | 4   | B | 4 |
| 75216227 | 3000_Vegetables | Corn, white, cooked, from fresh, made with oil                                              | 48 | 4.5 | A | 4 |
| 73403022 | 3000_Vegetables | Sweet potato, baked, peel not eaten, made with butter                                       | 48 | 4   | B | 4 |
| 75306999 | 3000_Vegetables | Green peppers and onions, cooked, NS as to fat added in cooking                             | 47 | 4.5 | B | 4 |
| 75209500 | 3000_Vegetables | Burdock, cooked, fat not added in cooking                                                   | 47 | 4   | B | 3 |
| 75303023 | 3000_Vegetables | Corn with peppers, red or green, cooked, made with margarine                                | 47 | 4.5 | B | 4 |
| 71905010 | 3000_Vegetables | Ripe plantain, boiled                                                                       | 47 | 4   | C | 3 |
| 71103105 | 3000_Vegetables | Potato, boiled, from fresh, peel eaten, NS as to fat added in cooking                       | 47 | 4.5 | B | 4 |
| 71103115 | 3000_Vegetables | Potato, boiled, from fresh, peel eaten, fat added in cooking, NS as to type of fat          | 47 | 4.5 | B | 4 |
| 71104040 | 3000_Vegetables | Potato, roasted, from fresh, peel eaten, NS as to fat added in cooking                      | 47 | 4.5 | B | 4 |
| 71104060 | 3000_Vegetables | Potato, roasted, from fresh, peel eaten, fat added in cooking, NS as to type of fat         | 47 | 4.5 | B | 4 |
| 75216184 | 3000_Vegetables | Corn, yellow and white, cooked, from frozen, made with oil                                  | 47 | 4.5 | A | 4 |
| 75200100 | 3000_Vegetables | Vegetables, NS as to type, cooked, NS as to fat added in cooking                            | 47 | 5   | A | 4 |
| 75200120 | 3000_Vegetables | Vegetables, NS as to type, cooked, fat added in cooking, NS as to type of fat               | 47 | 5   | A | 4 |
| 75311000 | 3000_Vegetables | Mixed vegetables, cooked, NS as to form, NS as to fat added in cooking                      | 47 | 5   | A | 4 |
| 75311002 | 3000_Vegetables | Mixed vegetables, cooked, from frozen, NS as to fat added in cooking                        | 47 | 5   | A | 4 |
| 75311020 | 3000_Vegetables | Mixed vegetables, cooked, NS as to form, fat added in cooking, NS as to type of fat         | 47 | 5   | A | 4 |
| 75311022 | 3000_Vegetables | Mixed vegetables, cooked, from frozen, fat added in cooking, NS as to type of fat           | 47 | 5   | A | 4 |
| 75217000 | 3000_Vegetables | Eggplant, cooked, NS as to fat added in cooking                                             | 47 | 4   | B | 4 |
| 75217020 | 3000_Vegetables | Eggplant, cooked, fat added in cooking, NS as to type of fat                                | 47 | 4   | B | 4 |
| 73111234 | 3000_Vegetables | Peas and carrots, cooked, from canned, made with butter                                     | 47 | 4.5 | B | 4 |
| 71603020 | 3000_Vegetables | Potato salad, made with mayonnaise-type salad dressing                                      | 47 | 4   | B | 4 |
| 75317000 | 3000_Vegetables | Vegetables, stew type, cooked, NS as to fat added in cooking                                | 47 | 4   | B | 4 |
| 75317010 | 3000_Vegetables | Vegetables, stew type, cooked, fat added in cooking, NS as to type of fat                   | 47 | 4   | B | 4 |
| 75302070 | 3000_Vegetables | Beans, string, green, with spaetzle, cooked, fat not added in cooking                       | 47 | 4.5 | A | 4 |
| 74202051 | 3000_Vegetables | Tomatoes, red, from fresh, fried                                                            | 47 | 4   | C | 4 |
| 75204001 | 3000_Vegetables | Beans, lima, immature, cooked, from fresh, NS as to fat added in cooking                    | 46 | 5   | A | 4 |
| 75204021 | 3000_Vegetables | Beans, lima, immature, cooked, from fresh, fat added in cooking, NS as to type of fat       | 46 | 5   | A | 4 |
| 75204023 | 3000_Vegetables | Beans, lima, immature, cooked, from canned, fat added in cooking, NS as to type of fat      | 46 | 5   | A | 4 |
| 75234025 | 3000_Vegetables | Turnip, cooked, from canned, made with butter                                               | 46 | 4   | B | 4 |
| 75234028 | 3000_Vegetables | Turnip, cooked, from fresh, made with butter                                                | 46 | 4   | B | 4 |
| 75200122 | 3000_Vegetables | Vegetables, NS as to type, cooked, made with butter                                         | 46 | 4.5 | A | 4 |
| 75311025 | 3000_Vegetables | Mixed vegetables, cooked, NS as to form, made with butter                                   | 46 | 4.5 | A | 4 |
| 75311028 | 3000_Vegetables | Mixed vegetables, cooked, from frozen, made with butter                                     | 46 | 4.5 | A | 4 |
| 71401000 | 3000_Vegetables | Potato, french fries, NS as to fresh or frozen                                              | 46 | 4   | C | 4 |
| 71400990 | 3000_Vegetables | Potato, french fries, NFS                                                                   | 46 | 4   | C | 4 |
| 75216224 | 3000_Vegetables | Corn, white, cooked, NS as to form, made with oil                                           | 46 | 4.5 | A | 4 |
| 75216232 | 3000_Vegetables | Corn, white, cooked, from frozen, made with oil                                             | 46 | 4.5 | A | 4 |
| 75223025 | 3000_Vegetables | Peas, cowpeas, field peas, or blackeye peas, not dried, cooked, NS as to form, made with t  | 46 | 5   | A | 4 |
| 75223031 | 3000_Vegetables | Peas, cowpeas, field peas, or blackeye peas, not dried, cooked, from frozen, made with bu   | 46 | 5   | A | 4 |
| 71970110 | 3000_Vegetables | Starchy vegetables, NFS, Puerto Rican style                                                 | 46 | 4.5 | A | 3 |
| 71970120 | 3000_Vegetables | Starchy vegetables, including tannier, white sweet potato and yam, with green or ripe pla   | 46 | 4.5 | A | 3 |
| 75216170 | 3000_Vegetables | Corn, yellow and white, cooked, NS as to form, fat not added in cooking                     | 46 | 4.5 | A | 3 |
| 75216172 | 3000_Vegetables | Corn, yellow and white, cooked, from frozen, fat not added in cooking                       | 46 | 4.5 | A | 3 |
| 75315251 | 3000_Vegetables | Cowpeas with snap beans, cooked, fat added in cooking                                       | 45 | 4.5 | A | 4 |
| 71102980 | 3000_Vegetables | Potato, boiled, NFS                                                                         | 45 | 4.5 | B | 4 |
| 71102990 | 3000_Vegetables | Potato, boiled, ready-to-heat                                                               | 45 | 4.5 | B | 4 |
| 71104030 | 3000_Vegetables | Potato, roasted, NFS                                                                        | 45 | 4.5 | B | 4 |
| 71104100 | 3000_Vegetables | Potato, roasted, from fresh, peel not eaten, NS as to fat added in cooking                  | 45 | 4.5 | B | 4 |
| 71104110 | 3000_Vegetables | Potato, roasted, from fresh, peel not eaten, fat added in cooking, NS as to type of fat     | 45 | 4.5 | B | 4 |
| 71104200 | 3000_Vegetables | Potato, roasted, ready-to-heat                                                              | 45 | 4.5 | B | 4 |
| 71103000 | 3000_Vegetables | Potato, boiled, from fresh, peel not eaten, NS as to fat added in cooking                   | 45 | 4.5 | B | 4 |
| 71000100 | 3000_Vegetables | Potato, NFS                                                                                 | 45 | 4.5 | B | 4 |
| 71103020 | 3000_Vegetables | Potato, boiled, from fresh, peel not eaten, fat added in cooking, NS as to type of fat      | 45 | 4.5 | B | 4 |
| 71970130 | 3000_Vegetables | Starchy vegetables, including tannier, white sweet potato and yam, no plantain, Puerto Ri   | 45 | 4.5 | A | 3 |
| 75216013 | 3000_Vegetables | Corn, cooked, from canned, NS as to color, fat not added in cooking                         | 45 | 4.5 | B | 3 |
| 75216113 | 3000_Vegetables | Corn, yellow, cooked, from canned, fat not added in cooking                                 | 45 | 4.5 | B | 3 |
| 75315217 | 3000_Vegetables | Peas and mushrooms, cooked, made with butter                                                | 45 | 4.5 | A | 4 |
| 75223021 | 3000_Vegetables | Peas, cowpeas, field peas, or blackeye peas, not dried, cooked, from fresh, fat added in co | 45 | 4.5 | A | 4 |
| 75302212 | 3000_Vegetables | Beans, string, green, with onions, cooked, made with butter                                 | 45 | 4.5 | B | 4 |
| 75221000 | 3000_Vegetables | Onions, cooked, NS as to form, NS as to fat added in cooking                                | 45 | 4.5 | B | 4 |
| 75221002 | 3000_Vegetables | Onions, cooked, from frozen, NS as to fat added in cooking                                  | 45 | 4.5 | B | 4 |
| 75221020 | 3000_Vegetables | Onions, cooked, NS as to form, fat added in cooking, NS as to type of fat                   | 45 | 4.5 | B | 4 |
| 75221022 | 3000_Vegetables | Onions, cooked, from frozen, fat added in cooking, NS as to type of fat                     | 45 | 4.5 | B | 4 |
| 71603045 | 3000_Vegetables | Potato salad, made with light Italian dressing                                              | 45 | 4   | B | 4 |
| 75301123 | 3000_Vegetables | Beans, lima and corn, cooked, made with margarine                                           | 45 | 4.5 | A | 4 |
| 75216213 | 3000_Vegetables | Corn, white, cooked, from canned, fat not added in cooking                                  | 45 | 4.5 | A | 3 |
| 75223023 | 3000_Vegetables | Peas, cowpeas, field peas, or blackeye peas, not dried, cooked, from canned, fat added in   | 45 | 5   | A | 4 |
| 75223003 | 3000_Vegetables | Peas, cowpeas, field peas, or blackeye peas, not dried, cooked, from canned, NS as to fat a | 45 | 5   | A | 4 |
| 75216700 | 3000_Vegetables | Cucumber, cooked, NS as to fat added in cooking                                             | 45 | 4   | C | 4 |
| 75216720 | 3000_Vegetables | Cucumber, cooked, fat added in cooking, NS as to type of fat                                | 45 | 4   | C | 4 |
| 71103300 | 3000_Vegetables | Potato, canned, NS as to fat added in cooking                                               | 45 | 4.5 | B | 4 |
| 71103310 | 3000_Vegetables | Potato, canned, fat added in cooking, NS as to type of fat                                  | 45 | 4.5 | B | 4 |

Supplementary Table 8. Original (uncorrected) scores for all food items.

|          |                 |                                                                                            |    |     |   |   |
|----------|-----------------|--------------------------------------------------------------------------------------------|----|-----|---|---|
| 75216173 | 3000_Vegetables | Corn, yellow and white, cooked, from canned, fat not added in cooking                      | 44 | 4.5 | B | 3 |
| 75208520 | 3000_Vegetables | Breadfruit, fried                                                                          | 44 | 4.5 | B | 4 |
| 75224030 | 3000_Vegetables | Peas, green, cooked, NS as to form, fat added in cooking, NS as to type of fat             | 44 | 4.5 | A | 4 |
| 75216034 | 3000_Vegetables | Corn, cooked, from canned, NS as to color, made with oil                                   | 44 | 4   | B | 4 |
| 75216141 | 3000_Vegetables | Corn, yellow, cooked, from canned, made with oil                                           | 44 | 4   | B | 4 |
| 75224012 | 3000_Vegetables | Peas, green, cooked, from frozen, NS as to fat added in cooking                            | 44 | 4.5 | A | 4 |
| 75224032 | 3000_Vegetables | Peas, green, cooked, from frozen, fat added in cooking, NS as to type of fat               | 44 | 4.5 | A | 4 |
| 74204011 | 3000_Vegetables | Tomatoes, from fresh, stewed                                                               | 44 | 4.5 | B | 4 |
| 71106000 | 3000_Vegetables | Stewed potatoes, Puerto Rican style                                                        | 44 | 4   | B | 4 |
| 77121010 | 3000_Vegetables | Fried stuffed potatoes, Puerto Rican style                                                 | 44 | 4   | B | 4 |
| 75317012 | 3000_Vegetables | Vegetables, stew type, cooked, made with butter                                            | 44 | 4   | B | 4 |
| 75216179 | 3000_Vegetables | Corn, yellow and white, cooked, from fresh, made with margarine                            | 44 | 4.5 | A | 4 |
| 75221001 | 3000_Vegetables | Onions, cooked, from fresh, NS as to fat added in cooking                                  | 44 | 4.5 | B | 4 |
| 75221021 | 3000_Vegetables | Onions, cooked, from fresh, fat added in cooking, NS as to type of fat                     | 44 | 4.5 | B | 4 |
| 75224010 | 3000_Vegetables | Peas, green, cooked, NS as to form, NS as to fat added in cooking                          | 44 | 4.5 | A | 4 |
| 71401031 | 3000_Vegetables | Potato, french fries, restaurant                                                           | 44 | 4   | B | 4 |
| 71401041 | 3000_Vegetables | Potato, french fries, with cheese, school                                                  | 44 | 4   | B | 4 |
| 75216026 | 3000_Vegetables | Corn, cooked, NS as to form, NS as to color, made with margarine                           | 44 | 4.5 | A | 4 |
| 75216033 | 3000_Vegetables | Corn, cooked, from frozen, NS as to color, made with margarine                             | 44 | 4.5 | A | 4 |
| 75216133 | 3000_Vegetables | Corn, yellow, cooked, NS as to form, made with margarine                                   | 44 | 4.5 | A | 4 |
| 75216139 | 3000_Vegetables | Corn, yellow, cooked, from frozen, made with margarine                                     | 44 | 4.5 | A | 4 |
| 75216212 | 3000_Vegetables | Corn, white, cooked, from frozen, fat not added in cooking                                 | 43 | 4.5 | A | 3 |
| 75216210 | 3000_Vegetables | Corn, white, cooked, NS as to form, fat not added in cooking                               | 43 | 4.5 | A | 3 |
| 71601015 | 3000_Vegetables | Potato salad with egg, made with light mayonnaise                                          | 43 | 4.5 | B | 4 |
| 71601025 | 3000_Vegetables | Potato salad with egg, made with light mayonnaise-type salad dressing                      | 43 | 4.5 | B | 4 |
| 75233210 | 3000_Vegetables | Squash, spaghetti, cooked, fat added in cooking, NS as to type of fat                      | 43 | 4   | B | 4 |
| 71401030 | 3000_Vegetables | Potato, french fries, fast food                                                            | 43 | 4.5 | B | 4 |
| 75216029 | 3000_Vegetables | Corn, cooked, from fresh, NS as to color, made with margarine                              | 43 | 4.5 | A | 4 |
| 75216136 | 3000_Vegetables | Corn, yellow, cooked, from fresh, made with margarine                                      | 43 | 4.5 | A | 4 |
| 75216229 | 3000_Vegetables | Corn, white, cooked, from fresh, made with margarine                                       | 43 | 4.5 | A | 4 |
| 75204028 | 3000_Vegetables | Beans, lima, immature, cooked, from fresh, made with butter                                | 43 | 5   | A | 4 |
| 75330130 | 3000_Vegetables | Vegetable combination, excluding carrots, broccoli, and dark-green leafy; cooked, no sauc  | 43 | 4.5 | B | 4 |
| 75330150 | 3000_Vegetables | Vegetable combination, excluding carrots, broccoli, and dark-green leafy; cooked, no sauc  | 43 | 4.5 | B | 4 |
| 75216211 | 3000_Vegetables | Corn, white, cooked, from fresh, fat not added in cooking                                  | 43 | 4.5 | A | 4 |
| 75208000 | 3000_Vegetables | Beets, cooked, NS as to form, NS as to fat added in cooking                                | 43 | 4   | B | 4 |
| 75208001 | 3000_Vegetables | Beets, cooked, from fresh, NS as to fat added in cooking                                   | 43 | 4   | B | 4 |
| 75208002 | 3000_Vegetables | Beets, cooked, from frozen, NS as to fat added in cooking                                  | 43 | 4   | B | 4 |
| 75208020 | 3000_Vegetables | Beets, cooked, NS as to form, fat added in cooking, NS as to type of fat                   | 43 | 4   | B | 4 |
| 75208021 | 3000_Vegetables | Beets, cooked, from fresh, fat added in cooking, NS as to type of fat                      | 43 | 4   | B | 4 |
| 75208022 | 3000_Vegetables | Beets, cooked, from frozen, fat added in cooking, NS as to type of fat                     | 43 | 4   | B | 4 |
| 75208003 | 3000_Vegetables | Beets, cooked, from canned, NS as to fat added in cooking                                  | 43 | 4   | C | 4 |
| 75208023 | 3000_Vegetables | Beets, cooked, from canned, fat added in cooking, NS as to type of fat                     | 43 | 4   | C | 4 |
| 75307002 | 3000_Vegetables | Green peppers and onions, cooked, made with butter                                         | 42 | 4   | B | 4 |
| 71603050 | 3000_Vegetables | Potato salad, made with any type of fat free dressing                                      | 42 | 4   | B | 3 |
| 75216187 | 3000_Vegetables | Corn, yellow and white, cooked, from canned, made with oil                                 | 42 | 4.5 | B | 4 |
| 71601020 | 3000_Vegetables | Potato salad with egg, made with mayonnaise-type salad dressing                            | 42 | 4.5 | B | 4 |
| 75315100 | 3000_Vegetables | Peas and onions, cooked, NS as to fat added in cooking                                     | 42 | 4.5 | A | 4 |
| 75315120 | 3000_Vegetables | Peas and onions, cooked, fat added in cooking, NS as to type of fat                        | 42 | 4.5 | A | 4 |
| 71501018 | 3000_Vegetables | Potato, mashed, from school lunch                                                          | 42 | 4.5 | B | 4 |
| 71601040 | 3000_Vegetables | Potato salad with egg, made with Italian dressing                                          | 42 | 4.5 | B | 4 |
| 75216176 | 3000_Vegetables | Corn, yellow and white, cooked, NS as to form, made with margarine                         | 42 | 4.5 | A | 4 |
| 75216186 | 3000_Vegetables | Corn, yellow and white, cooked, from frozen, made with margarine                           | 42 | 4.5 | A | 4 |
| 75315000 | 3000_Vegetables | Peas and corn, cooked, NS as to fat added in cooking                                       | 41 | 4.5 | A | 4 |
| 75315020 | 3000_Vegetables | Peas and corn, cooked, fat added in cooking, NS as to type of fat                          | 41 | 4.5 | A | 4 |
| 71601035 | 3000_Vegetables | Potato salad with egg, made with light creamy dressing                                     | 41 | 4.5 | B | 4 |
| 75315305 | 3000_Vegetables | Peas and potatoes, cooked, NS as to fat added in cooking                                   | 41 | 4.5 | A | 4 |
| 75315310 | 3000_Vegetables | Peas and potatoes, cooked, fat added in cooking, NS as to type of fat                      | 41 | 4.5 | A | 4 |
| 71601010 | 3000_Vegetables | Potato salad with egg, made with mayonnaise                                                | 41 | 4   | C | 4 |
| 71404010 | 3000_Vegetables | Potato, hash brown, from fast food                                                         | 41 | 3.5 | C | 4 |
| 71404030 | 3000_Vegetables | Potato, hash brown, from restaurant                                                        | 41 | 3.5 | C | 4 |
| 75208122 | 3000_Vegetables | Beets, cooked, NS as to form, made with butter                                             | 41 | 4   | B | 4 |
| 75208125 | 3000_Vegetables | Beets, cooked, from fresh, made with butter                                                | 41 | 4   | B | 4 |
| 75208128 | 3000_Vegetables | Beets, cooked, from frozen, made with butter                                               | 41 | 4   | B | 4 |
| 75223028 | 3000_Vegetables | Peas, cowpeas, field peas, or blackeye peas, not dried, cooked, from fresh, made with butl | 41 | 4.5 | A | 4 |
| 75330152 | 3000_Vegetables | Vegetable combination, excluding carrots, broccoli, and dark-green leafy; cooked, no sauc  | 41 | 4.5 | B | 4 |
| 75302500 | 3000_Vegetables | Beans, string, green, and potatoes, cooked, NS as to fat added in cooking                  | 40 | 4   | B | 4 |
| 75302510 | 3000_Vegetables | Beans, string, green, and potatoes, cooked, fat added in cooking, NS as to type of fat     | 40 | 4   | B | 4 |
| 75216226 | 3000_Vegetables | Corn, white, cooked, NS as to form, made with margarine                                    | 40 | 4.5 | A | 4 |
| 75216234 | 3000_Vegetables | Corn, white, cooked, from frozen, made with margarine                                      | 40 | 4.5 | A | 4 |
| 73301030 | 3000_Vegetables | Squash, winter type, mashed, fat and sugar added in cooking                                | 40 | 4   | B | 4 |
| 75223034 | 3000_Vegetables | Peas, cowpeas, field peas, or blackeye peas, not dried, cooked, from canned, made with b   | 40 | 5   | A | 4 |
| 75224041 | 3000_Vegetables | Peas, green, cooked, NS as to form, made with butter                                       | 40 | 4.5 | A | 4 |
| 75224047 | 3000_Vegetables | Peas, green, cooked, from frozen, made with butter                                         | 40 | 4.5 | A | 4 |
| 75224013 | 3000_Vegetables | Peas, green, cooked, from canned, NS as to fat added in cooking                            | 40 | 4.5 | A | 4 |
| 75224033 | 3000_Vegetables | Peas, green, cooked, from canned, fat added in cooking, NS as to type of fat               | 40 | 4.5 | A | 4 |
| 73303030 | 3000_Vegetables | Squash, winter type, baked, fat and sugar added in cooking                                 | 40 | 4   | B | 4 |
| 75222000 | 3000_Vegetables | Parsnips, cooked, NS as to fat added in cooking                                            | 40 | 4.5 | B | 4 |
| 75222020 | 3000_Vegetables | Parsnips, cooked, fat added in cooking, NS as to type of fat                               | 40 | 4.5 | B | 4 |
| 71401020 | 3000_Vegetables | Potato, french fries, from frozen, baked                                                   | 40 | 4.5 | B | 4 |
| 75208131 | 3000_Vegetables | Beets, cooked, from canned, made with butter                                               | 40 | 4   | C | 4 |
| 75221015 | 3000_Vegetables | Onions, cooked, NS as to form, made with butter                                            | 40 | 4.5 | B | 4 |
| 71402520 | 3000_Vegetables | Potato, french fries, with chili                                                           | 39 | 4   | B | 4 |
| 71401045 | 3000_Vegetables | Potato, french fries, with chili, fast food / restaurant                                   | 39 | 4   | B | 4 |
| 75302512 | 3000_Vegetables | Beans, string, green, and potatoes, cooked, made with butter                               | 39 | 4   | B | 4 |
| 75221018 | 3000_Vegetables | Onions, cooked, from fresh, made with butter                                               | 39 | 4   | C | 4 |
| 75302069 | 3000_Vegetables | Beans, string, green, with spaetzle, cooked, NS as to fat added in cooking                 | 39 | 4   | B | 4 |

Supplementary Table 8. Original (uncorrected) scores for all food items.

|          |                 |                                                                                          |    |     |   |   |
|----------|-----------------|------------------------------------------------------------------------------------------|----|-----|---|---|
| 75302071 | 3000_Vegetables | Beans, string, green, with spaetzle, cooked, fat added in cooking                        | 39 | 4   | B | 4 |
| 75216036 | 3000_Vegetables | Corn, cooked, from canned, NS as to color, made with margarine                           | 39 | 4.5 | B | 4 |
| 75216143 | 3000_Vegetables | Corn, yellow, cooked, from canned, made with margarine                                   | 39 | 4.5 | B | 4 |
| 75216722 | 3000_Vegetables | Cucumber, cooked, made with butter                                                       | 38 | 4   | C | 4 |
| 75222022 | 3000_Vegetables | Parsnips, cooked, made with butter                                                       | 38 | 4.5 | B | 4 |
| 73405022 | 3000_Vegetables | Sweet potato, boiled, made with butter                                                   | 38 | 4   | C | 4 |
| 75315312 | 3000_Vegetables | Peas and potatoes, cooked, made with butter                                              | 38 | 4.5 | A | 4 |
| 75221024 | 3000_Vegetables | Onions, cooked, from frozen, made with butter                                            | 38 | 4   | B | 4 |
| 75216189 | 3000_Vegetables | Corn, yellow and white, cooked, from canned, made with margarine                         | 37 | 4.5 | B | 4 |
| 75216237 | 3000_Vegetables | Corn, white, cooked, from canned, made with margarine                                    | 37 | 4.5 | B | 4 |
| 75216300 | 3000_Vegetables | Corn, yellow, canned, low sodium, NS as to fat added in cooking                          | 37 | 4.5 | A | 4 |
| 75216320 | 3000_Vegetables | Corn, yellow, canned, low sodium, fat added in cooking, NS as to type of fat             | 37 | 4.5 | A | 4 |
| 75500210 | 3000_Vegetables | Beets, pickled                                                                           | 37 | 4   | B | 3 |
| 71401039 | 3000_Vegetables | Potato, french fries, with cheese, fast food / restaurant                                | 37 | 4   | C | 4 |
| 75204022 | 3000_Vegetables | Beans, lima, immature, cooked, from frozen, fat added in cooking, NS as to type of fat   | 37 | 5   | A | 4 |
| 75229009 | 3000_Vegetables | Salsify, cooked, NS as to fat added in cooking                                           | 37 | 4.5 | B | 4 |
| 75229011 | 3000_Vegetables | Salsify, cooked, fat added in cooking                                                    | 37 | 4.5 | B | 4 |
| 71402500 | 3000_Vegetables | Potato, french fries, with cheese                                                        | 37 | 4   | C | 4 |
| 75204000 | 3000_Vegetables | Beans, lima, immature, cooked, NS as to form, NS as to fat added in cooking              | 36 | 5   | A | 4 |
| 75204003 | 3000_Vegetables | Beans, lima, immature, cooked, from canned, NS as to fat added in cooking                | 36 | 5   | A | 4 |
| 75204020 | 3000_Vegetables | Beans, lima, immature, cooked, NS as to form, fat added in cooking, NS as to type of fat | 36 | 5   | A | 4 |
| 75204002 | 3000_Vegetables | Beans, lima, immature, cooked, from frozen, NS as to fat added in cooking                | 36 | 5   | A | 4 |
| 71405019 | 3000_Vegetables | Potato, hash brown, from fresh, with cheese                                              | 36 | 4   | C | 4 |
| 71601045 | 3000_Vegetables | Potato salad with egg, made with light Italian dressing                                  | 36 | 4.5 | B | 4 |
| 71410500 | 3000_Vegetables | Potato skins, with cheese                                                                | 36 | 4   | C | 4 |
| 71411100 | 3000_Vegetables | Potato skins, NFS                                                                        | 36 | 4   | C | 4 |
| 71930130 | 3000_Vegetables | Cassava, cooked, made with oil                                                           | 36 | 4   | B | 4 |
| 75233222 | 3000_Vegetables | Squash, spaghetti, cooked, made with butter                                              | 36 | 4   | B | 4 |
| 71602010 | 3000_Vegetables | Potato salad, German style                                                               | 35 | 4.5 | B | 4 |
| 75315022 | 3000_Vegetables | Peas and corn, cooked, made with butter                                                  | 35 | 4.5 | A | 4 |
| 71501005 | 3000_Vegetables | Potato, mashed, from fast food                                                           | 35 | 4   | B | 4 |
| 73102240 | 3000_Vegetables | Carrots, cooked, NS as to form, glazed                                                   | 35 | 4   | B | 4 |
| 71401050 | 3000_Vegetables | Potato, french fries, with chili and cheese, fast food / restaurant                      | 35 | 4   | C | 4 |
| 71402510 | 3000_Vegetables | Potato, french fries, with chili and cheese                                              | 35 | 4   | C | 4 |
| 75217022 | 3000_Vegetables | Eggplant, cooked, made with butter                                                       | 35 | 4   | B | 4 |
| 75303000 | 3000_Vegetables | Corn with peppers, red or green, cooked, NS as to fat added in cooking                   | 35 | 4.5 | B | 4 |
| 75303020 | 3000_Vegetables | Corn with peppers, red or green, cooked, fat added in cooking, NS as to type of fat      | 35 | 4.5 | B | 4 |
| 71405050 | 3000_Vegetables | Potato, hash brown, ready-to-heat, with cheese                                           | 35 | 4   | C | 4 |
| 71901110 | 3000_Vegetables | Fried green plantain, Puerto Rican style                                                 | 35 | 2   | D | 4 |
| 75216070 | 3000_Vegetables | Corn, dried, cooked                                                                      | 35 | 4   | B | 4 |
| 75501010 | 3000_Vegetables | Corn relish                                                                              | 35 | 4   | C | 3 |
| 75224050 | 3000_Vegetables | Peas, green, cooked, from canned, made with butter                                       | 35 | 4.5 | A | 4 |
| 71106070 | 3000_Vegetables | Potato from Puerto Rican chicken fricassee, with sauce                                   | 34 | 4.5 | B | 4 |
| 75315122 | 3000_Vegetables | Peas and onions, cooked, made with butter                                                | 34 | 4.5 | B | 4 |
| 71411000 | 3000_Vegetables | Potato skins, with cheese and bacon                                                      | 34 | 4   | C | 4 |
| 71403030 | 3000_Vegetables | Potato, home fries, from restaurant / fast food                                          | 34 | 3.5 | C | 4 |
| 71930100 | 3000_Vegetables | Cassava, cooked, fat not added in cooking                                                | 34 | 4   | B | 3 |
| 71505030 | 3000_Vegetables | Potato tots, from fresh, fried or baked                                                  | 33 | 4   | C | 4 |
| 71505050 | 3000_Vegetables | Potato tots, frozen, fried                                                               | 33 | 4   | C | 4 |
| 71505060 | 3000_Vegetables | Potato tots, frozen, NS as to fried or baked                                             | 33 | 4   | C | 4 |
| 71505000 | 3000_Vegetables | Potato tots, NFS                                                                         | 33 | 4   | C | 4 |
| 75503140 | 3000_Vegetables | Cucumber pickles, sweet, reduced salt                                                    | 33 | 4   | C | 3 |
| 75204025 | 3000_Vegetables | Beans, lima, immature, cooked, NS as to form, made with butter                           | 33 | 5   | A | 4 |
| 75204031 | 3000_Vegetables | Beans, lima, immature, cooked, from frozen, made with butter                             | 33 | 5   | A | 4 |
| 75204034 | 3000_Vegetables | Beans, lima, immature, cooked, from canned, made with butter                             | 33 | 5   | A | 4 |
| 75301100 | 3000_Vegetables | Beans, lima and corn, cooked, NS as to fat added in cooking                              | 33 | 4.5 | A | 4 |
| 75301120 | 3000_Vegetables | Beans, lima and corn, cooked, fat added in cooking, NS as to type of fat                 | 33 | 4.5 | A | 4 |
| 73102241 | 3000_Vegetables | Carrots, cooked, from fresh, glazed                                                      | 32 | 4   | C | 4 |
| 71501011 | 3000_Vegetables | Potato, mashed, from fresh, made with milk, with cheese                                  | 32 | 4   | C | 4 |
| 75216201 | 3000_Vegetables | Corn, white, cooked, from fresh, NS as to fat added in cooking                           | 32 | 4.5 | B | 4 |
| 75216221 | 3000_Vegetables | Corn, white, cooked, from fresh, fat added in cooking, NS as to type of fat              | 32 | 4.5 | B | 4 |
| 75216161 | 3000_Vegetables | Corn, yellow and white, cooked, from fresh, NS as to fat added in cooking                | 31 | 4.5 | B | 4 |
| 75216181 | 3000_Vegetables | Corn, yellow and white, cooked, from fresh, fat added in cooking, NS as to type of fat   | 31 | 4.5 | B | 4 |
| 71103140 | 3000_Vegetables | Potato, boiled, from fresh, peel eaten, made with butter                                 | 31 | 4   | B | 4 |
| 71104080 | 3000_Vegetables | Potato, roasted, from fresh, peel eaten, made with butter                                | 31 | 4   | B | 4 |
| 75208499 | 3000_Vegetables | Breadfruit, cooked, NS as to fat added in cooking                                        | 31 | 4.5 | B | 4 |
| 75208501 | 3000_Vegetables | Breadfruit, cooked, fat added in cooking                                                 | 31 | 4.5 | B | 4 |
| 73409000 | 3000_Vegetables | Sweet potato, casserole or mashed                                                        | 31 | 4   | B | 4 |
| 75216001 | 3000_Vegetables | Corn, cooked, from fresh, NS as to color, NS as to fat added in cooking                  | 31 | 4.5 | A | 4 |
| 75216021 | 3000_Vegetables | Corn, cooked, from fresh, NS as to color, fat added in cooking, NS as to type of fat     | 31 | 4.5 | A | 4 |
| 75216101 | 3000_Vegetables | Corn, yellow, cooked, from fresh, NS as to fat added in cooking                          | 31 | 4.5 | A | 4 |
| 75216121 | 3000_Vegetables | Corn, yellow, cooked, from fresh, fat added in cooking, NS as to type of fat             | 31 | 4.5 | A | 4 |
| 71404020 | 3000_Vegetables | Potato, hash brown, from fast food, with cheese                                          | 31 | 3.5 | D | 4 |
| 71404040 | 3000_Vegetables | Potato, hash brown, from restaurant, with cheese                                         | 31 | 3.5 | D | 4 |
| 73102242 | 3000_Vegetables | Carrots, cooked, from frozen, glazed                                                     | 31 | 4   | C | 4 |
| 75216322 | 3000_Vegetables | Corn, yellow, canned, low sodium, made with butter                                       | 31 | 4.5 | B | 4 |
| 71501071 | 3000_Vegetables | Potato, mashed, ready-to-heat, with cheese                                               | 31 | 4   | C | 4 |
| 71305015 | 3000_Vegetables | Potato, scalloped, NFS                                                                   | 31 | 3.5 | C | 4 |
| 71305030 | 3000_Vegetables | Potato, scalloped, from fresh                                                            | 31 | 3.5 | C | 4 |
| 71508005 | 3000_Vegetables | Potato, baked, peel eaten, with butter                                                   | 30 | 4   | B | 4 |
| 75216000 | 3000_Vegetables | Corn, cooked, NS as to form, NS as to color, NS as to fat added in cooking               | 30 | 4.5 | B | 4 |
| 75216002 | 3000_Vegetables | Corn, cooked, from frozen, NS as to color, NS as to fat added in cooking                 | 30 | 4.5 | B | 4 |
| 75216020 | 3000_Vegetables | Corn, cooked, NS as to form, NS as to color, fat added in cooking, NS as to type of fat  | 30 | 4.5 | B | 4 |
| 75216022 | 3000_Vegetables | Corn, cooked, from frozen, NS as to color, fat added in cooking, NS as to type of fat    | 30 | 4.5 | B | 4 |
| 75216100 | 3000_Vegetables | Corn, yellow, cooked, NS as to form, NS as to fat added in cooking                       | 30 | 4.5 | B | 4 |
| 75216102 | 3000_Vegetables | Corn, yellow, cooked, from frozen, NS as to fat added in cooking                         | 30 | 4.5 | B | 4 |

Supplementary Table 8. Original (uncorrected) scores for all food items.

|          |                 |                                                                                           |    |     |   |   |
|----------|-----------------|-------------------------------------------------------------------------------------------|----|-----|---|---|
| 75216120 | 3000_Vegetables | Corn, yellow, cooked, NS as to form, fat added in cooking, NS as to type of fat           | 30 | 4.5 | B | 4 |
| 75216122 | 3000_Vegetables | Corn, yellow, cooked, from frozen, fat added in cooking, NS as to type of fat             | 30 | 4.5 | B | 4 |
| 71930150 | 3000_Vegetables | Cassava, cooked, made with margarine                                                      | 30 | 4   | B | 4 |
| 71501006 | 3000_Vegetables | Potato, mashed, from fast food, with gravy                                                | 30 | 4   | C | 4 |
| 71103040 | 3000_Vegetables | Potato, boiled, from fresh, peel not eaten, made with butter                              | 30 | 4   | C | 4 |
| 71104140 | 3000_Vegetables | Potato, roasted, from fresh, peel not eaten, made with butter                             | 30 | 4   | C | 4 |
| 71962020 | 3000_Vegetables | Dasheen, fried                                                                            | 29 | 4   | C | 4 |
| 71501013 | 3000_Vegetables | Potato, mashed, from fresh, NFS                                                           | 29 | 4   | C | 4 |
| 71501010 | 3000_Vegetables | Potato, mashed, from fresh, made with milk                                                | 29 | 4   | C | 4 |
| 71503010 | 3000_Vegetables | Potato patty                                                                              | 29 | 3.5 | C | 4 |
| 75415021 | 3000_Vegetables | Onion rings, from fresh, batter-dipped, baked or fried                                    | 29 | 3   | C | 4 |
| 71305040 | 3000_Vegetables | Potato, scalloped, from fresh, with meat                                                  | 29 | 3.5 | C | 4 |
| 71501045 | 3000_Vegetables | Potato, mashed, from dry mix, with milk, with cheese                                      | 29 | 3.5 | C | 4 |
| 71501000 | 3000_Vegetables | Potato, mashed, NFS                                                                       | 29 | 4   | C | 4 |
| 71508035 | 3000_Vegetables | Potato, baked, peel eaten, with vegetables                                                | 29 | 4   | B | 4 |
| 71507005 | 3000_Vegetables | Potato, baked, peel not eaten, with butter                                                | 29 | 4   | C | 4 |
| 71508010 | 3000_Vegetables | Potato, baked, peel eaten, with sour cream                                                | 29 | 4   | C | 4 |
| 75303022 | 3000_Vegetables | Corn with peppers, red or green, cooked, made with butter                                 | 29 | 4.5 | B | 4 |
| 75216160 | 3000_Vegetables | Corn, yellow and white, cooked, NS as to form, NS as to fat added in cooking              | 28 | 4.5 | B | 4 |
| 75216162 | 3000_Vegetables | Corn, yellow and white, cooked, from frozen, NS as to fat added in cooking                | 28 | 4.5 | B | 4 |
| 75216180 | 3000_Vegetables | Corn, yellow and white, cooked, NS as to form, fat added in cooking, NS as to type of fat | 28 | 4.5 | B | 4 |
| 75216182 | 3000_Vegetables | Corn, yellow and white, cooked, from frozen, fat added in cooking, NS as to type of fat   | 28 | 4.5 | B | 4 |
| 71601050 | 3000_Vegetables | Potato salad with egg, made with any type of fat free dressing                            | 28 | 4.5 | B | 4 |
| 71305050 | 3000_Vegetables | Potato, scalloped, from dry mix                                                           | 28 | 3.5 | C | 4 |
| 71305070 | 3000_Vegetables | Potato, scalloped, ready-to-heat                                                          | 28 | 3.5 | D | 4 |
| 71106020 | 3000_Vegetables | Potato from Puerto Rican style stuffed pot roast, with gravy                              | 27 | 4.5 | B | 4 |
| 71106050 | 3000_Vegetables | Potato from Puerto Rican beef stew, with gravy                                            | 27 | 4.5 | B | 4 |
| 71507010 | 3000_Vegetables | Potato, baked, peel not eaten, with sour cream                                            | 27 | 4   | C | 4 |
| 71508030 | 3000_Vegetables | Potato, baked, peel eaten, with chili                                                     | 27 | 4   | C | 4 |
| 71702000 | 3000_Vegetables | Potato pudding                                                                            | 27 | 3.5 | C | 4 |
| 71507035 | 3000_Vegetables | Potato, baked, peel not eaten, with vegetables                                            | 27 | 4   | C | 4 |
| 71305080 | 3000_Vegetables | Potato, scalloped, ready-to-heat, with meat                                               | 27 | 3   | D | 4 |
| 75301122 | 3000_Vegetables | Beans, lima and corn, cooked, made with butter                                            | 27 | 4.5 | A | 4 |
| 71305060 | 3000_Vegetables | Potato, scalloped, from dry mix, with meat                                                | 27 | 3   | D | 4 |
| 71508020 | 3000_Vegetables | Potato, baked, peel eaten, with cheese                                                    | 27 | 4   | C | 4 |
| 75216200 | 3000_Vegetables | Corn, white, cooked, NS as to form, NS as to fat added in cooking                         | 26 | 4.5 | B | 4 |
| 75216202 | 3000_Vegetables | Corn, white, cooked, from frozen, NS as to fat added in cooking                           | 26 | 4.5 | B | 4 |
| 75216220 | 3000_Vegetables | Corn, white, cooked, NS as to form, fat added in cooking, NS as to type of fat            | 26 | 4.5 | B | 4 |
| 75216222 | 3000_Vegetables | Corn, white, cooked, from frozen, fat added in cooking, NS as to type of fat              | 26 | 4.5 | B | 4 |
| 73406000 | 3000_Vegetables | Sweet potato, candied                                                                     | 26 | 3.5 | C | 4 |
| 71305020 | 3000_Vegetables | Potato, scalloped, from fast food or restaurant                                           | 26 | 3   | D | 4 |
| 75216228 | 3000_Vegetables | Corn, white, cooked, from fresh, made with butter                                         | 26 | 4.5 | B | 4 |
| 71507030 | 3000_Vegetables | Potato, baked, peel not eaten, with chili                                                 | 26 | 4   | C | 4 |
| 75216053 | 3000_Vegetables | Corn, from canned, NS as to color, cream style                                            | 26 | 4.5 | B | 4 |
| 75216153 | 3000_Vegetables | Corn, yellow, from canned, cream style                                                    | 26 | 4.5 | B | 4 |
| 75216178 | 3000_Vegetables | Corn, yellow and white, cooked, from fresh, made with butter                              | 26 | 4.5 | B | 4 |
| 71505040 | 3000_Vegetables | Potato tots, frozen, baked                                                                | 26 | 4   | C | 4 |
| 75503100 | 3000_Vegetables | Mustard pickles                                                                           | 26 | 3.5 | C | 3 |
| 75216003 | 3000_Vegetables | Corn, cooked, from canned, NS as to color, NS as to fat added in cooking                  | 26 | 4   | B | 4 |
| 75216023 | 3000_Vegetables | Corn, cooked, from canned, NS as to color, fat added in cooking, NS as to type of fat     | 26 | 4   | B | 4 |
| 75216103 | 3000_Vegetables | Corn, yellow, cooked, from canned, NS as to fat added in cooking                          | 26 | 4   | B | 4 |
| 75216123 | 3000_Vegetables | Corn, yellow, cooked, from canned, fat added in cooking, NS as to type of fat             | 26 | 4   | B | 4 |
| 75216028 | 3000_Vegetables | Corn, cooked, from fresh, NS as to color, made with butter                                | 25 | 4.5 | A | 4 |
| 75216135 | 3000_Vegetables | Corn, yellow, cooked, from fresh, made with butter                                        | 25 | 4.5 | A | 4 |
| 71508025 | 3000_Vegetables | Potato, baked, peel eaten, with meat                                                      | 25 | 4   | C | 4 |
| 71905210 | 3000_Vegetables | Candied ripe plantain, Puerto Rican style                                                 | 25 | 3   | D | 4 |
| 75216163 | 3000_Vegetables | Corn, yellow and white, cooked, from canned, NS as to fat added in cooking                | 25 | 4   | B | 4 |
| 75216183 | 3000_Vegetables | Corn, yellow and white, cooked, from canned, fat added in cooking, NS as to type of fat   | 25 | 4   | B | 4 |
| 71501016 | 3000_Vegetables | Potato, mashed, from restaurant                                                           | 25 | 4   | C | 4 |
| 71501012 | 3000_Vegetables | Potato, mashed, from fresh, made with milk, with gravy                                    | 25 | 4   | B | 4 |
| 71507020 | 3000_Vegetables | Potato, baked, peel not eaten, with cheese                                                | 25 | 4   | C | 4 |
| 75216203 | 3000_Vegetables | Corn, white, cooked, from canned, NS as to fat added in cooking                           | 24 | 4   | B | 4 |
| 75216223 | 3000_Vegetables | Corn, white, cooked, from canned, fat added in cooking, NS as to type of fat              | 24 | 4   | B | 4 |
| 75216025 | 3000_Vegetables | Corn, cooked, NS as to form, NS as to color, made with butter                             | 24 | 4.5 | B | 4 |
| 75216032 | 3000_Vegetables | Corn, cooked, from frozen, NS as to color, made with butter                               | 24 | 4.5 | B | 4 |
| 75216132 | 3000_Vegetables | Corn, yellow, cooked, NS as to form, made with butter                                     | 24 | 4.5 | B | 4 |
| 75216138 | 3000_Vegetables | Corn, yellow, cooked, from frozen, made with butter                                       | 24 | 4.5 | B | 4 |
| 75216175 | 3000_Vegetables | Corn, yellow and white, cooked, NS as to form, made with butter                           | 24 | 4.5 | B | 4 |
| 75415022 | 3000_Vegetables | Onion rings, from frozen, batter-dipped, baked or fried                                   | 24 | 1.5 | D | 4 |
| 71507025 | 3000_Vegetables | Potato, baked, peel not eaten, with meat                                                  | 24 | 4   | C | 4 |
| 71505010 | 3000_Vegetables | Potato tots, fast food / restaurant                                                       | 24 | 3.5 | C | 4 |
| 73102243 | 3000_Vegetables | Carrots, cooked, from canned, glazed                                                      | 23 | 3.5 | C | 4 |
| 75216050 | 3000_Vegetables | Corn, NS as to form, NS as to color, cream style                                          | 23 | 4   | B | 4 |
| 75216150 | 3000_Vegetables | Corn, yellow, NS as to form, cream style                                                  | 23 | 4   | B | 4 |
| 71501035 | 3000_Vegetables | Potato, mashed, from dry mix, NFS                                                         | 23 | 4   | C | 4 |
| 71501007 | 3000_Vegetables | Potato, mashed, ready-to-heat                                                             | 23 | 4   | C | 4 |
| 71501061 | 3000_Vegetables | Potato, mashed, ready-to-heat, NFS                                                        | 23 | 4   | C | 4 |
| 71501040 | 3000_Vegetables | Potato, mashed, from dry mix, made with milk                                              | 23 | 4   | C | 4 |
| 75216193 | 3000_Vegetables | Corn, yellow, from canned, cream style, fat added in cooking                              | 23 | 4   | B | 4 |
| 75216185 | 3000_Vegetables | Corn, yellow and white, cooked, from frozen, made with butter                             | 22 | 4.5 | B | 4 |
| 75216253 | 3000_Vegetables | Corn, white, from canned, cream style                                                     | 22 | 4   | B | 4 |
| 71501017 | 3000_Vegetables | Potato, mashed, from restaurant, with gravy                                               | 22 | 3.5 | C | 4 |
| 75415020 | 3000_Vegetables | Onion rings, NS as to form, batter-dipped, baked or fried                                 | 22 | 3   | C | 4 |
| 75216225 | 3000_Vegetables | Corn, white, cooked, NS as to form, made with butter                                      | 21 | 4   | B | 4 |
| 75216233 | 3000_Vegetables | Corn, white, cooked, from frozen, made with butter                                        | 21 | 4.5 | B | 4 |
| 75216190 | 3000_Vegetables | Corn, yellow, NS as to form, cream style, fat added in cooking                            | 21 | 4   | C | 4 |

Supplementary Table 8. Original (uncorrected) scores for all food items.

|          |                 |                                                               |    |     |   |   |
|----------|-----------------|---------------------------------------------------------------|----|-----|---|---|
| 75503040 | 3000_Vegetables | Cucumber pickles, sweet                                       | 20 | 3.5 | C | 3 |
| 71501075 | 3000_Vegetables | Potato, mashed, ready-to-heat, with gravy                     | 20 | 4   | C | 4 |
| 75216250 | 3000_Vegetables | Corn, white, NS as to form, cream style                       | 20 | 4   | C | 4 |
| 75216035 | 3000_Vegetables | Corn, cooked, from canned, NS as to color, made with butter   | 20 | 4   | B | 4 |
| 75216142 | 3000_Vegetables | Corn, yellow, cooked, from canned, made with butter           | 20 | 4   | B | 4 |
| 71501054 | 3000_Vegetables | Potato, mashed, from dry mix, made with milk, with gravy      | 20 | 4   | C | 4 |
| 75216188 | 3000_Vegetables | Corn, yellow and white, cooked, from canned, made with butter | 19 | 4   | B | 4 |
| 75513010 | 3000_Vegetables | Seaweed, pickled                                              | 18 | 3.5 | C | 3 |
| 75216236 | 3000_Vegetables | Corn, white, cooked, from canned, made with butter            | 18 | 4   | B | 4 |
| 71930090 | 3000_Vegetables | Cassava, cooked, NS as to fat added in cooking                | 17 | 4   | C | 4 |
| 71930120 | 3000_Vegetables | Cassava, cooked, fat added in cooking, NS as to type of fat   | 17 | 4   | C | 4 |
| 74205010 | 3000_Vegetables | Tomatoes, green, cooked, NS as to form                        | 15 | 3.5 | C | 4 |
| 71930140 | 3000_Vegetables | Cassava, cooked, made with butter                             | 14 | 4   | C | 4 |
| 91408100 | 3000_Vegetables | Chinese preserved sweet vegetable                             | 9  | 0.5 | D | 4 |
| 71701500 | 3000_Vegetables | Lefse (Norwegian)                                             | 9  | 4   | B | 4 |
| 74202050 | 3000_Vegetables | Tomatoes, red, NS as to form, fried                           | 8  | 3.5 | C | 4 |
| 75511200 | 3000_Vegetables | Pickles, mixed                                                | 1  | 3.5 | D | 4 |
| 75503020 | 3000_Vegetables | Cucumber pickles, relish                                      | 1  | 3.5 | D | 4 |



Supplementary Table 8. Original (uncorrected) scores for all food items.

| foodcode | level1nd    | Description                                                                             | Food Compass Score | Health Star Rating | Nutri-Score | NOVA Category |
|----------|-------------|-----------------------------------------------------------------------------------------|--------------------|--------------------|-------------|---------------|
| 41106020 | 4000_LegNut | Red kidney beans, dry, cooked, fat not added in cooking                                 | 100                | 5                  | A           | 3             |
| 41107000 | 4000_LegNut | Soybeans, dry, cooked, fat not added in cooking                                         | 100                | 5                  | A           | 4             |
| 41305000 | 4000_LegNut | Lentils, dry, cooked, fat not added in cooking                                          | 100                | 5                  | A           | 3             |
| 41420010 | 4000_LegNut | Soybean curd                                                                            | 100                | 4                  | A           | 3             |
| 41420020 | 4000_LegNut | Edamame, cooked                                                                         | 100                | 5                  | A           | 1             |
| 41422010 | 4000_LegNut | Soybean meal                                                                            | 100                | 5                  | A           | 1             |
| 41440000 | 4000_LegNut | Textured vegetable protein, dry                                                         | 100                | 5                  | A           | 1             |
| 42100100 | 4000_LegNut | Almonds, NFS                                                                            | 100                | 5                  | A           | 1             |
| 42101000 | 4000_LegNut | Almonds, unroasted                                                                      | 100                | 5                  | A           | 1             |
| 42101130 | 4000_LegNut | Almonds, unsalted                                                                       | 100                | 5                  | A           | 1             |
| 42107000 | 4000_LegNut | Hazelnuts                                                                               | 100                | 5                  | A           | 1             |
| 42110050 | 4000_LegNut | Mixed nuts, unroasted                                                                   | 100                | 5                  | B           | 3             |
| 42110120 | 4000_LegNut | Mixed nuts, with peanuts, unsalted                                                      | 100                | 5                  | B           | 3             |
| 42110160 | 4000_LegNut | Mixed nuts, without peanuts, unsalted                                                   | 100                | 4.5                | B           | 1             |
| 42111040 | 4000_LegNut | Peanuts, unroasted                                                                      | 100                | 5                  | A           | 3             |
| 42113000 | 4000_LegNut | Pine nuts                                                                               | 100                | 4                  | A           | 1             |
| 42114130 | 4000_LegNut | Pistachio nuts, NFS                                                                     | 100                | 5                  | A           | 1             |
| 42114145 | 4000_LegNut | Pistachio nuts, unsalted                                                                | 100                | 5                  | A           | 1             |
| 42116000 | 4000_LegNut | Walnuts, NFS                                                                            | 100                | 4.5                | A           | 1             |
| 42116050 | 4000_LegNut | Walnuts                                                                                 | 100                | 4.5                | A           | 1             |
| 42202200 | 4000_LegNut | Peanut butter, vitamin and mineral fortified                                            | 100                | 4                  | C           | 3             |
| 43101050 | 4000_LegNut | Pumpkin seeds, NFS                                                                      | 100                | 5                  | B           | 1             |
| 43101150 | 4000_LegNut | Pumpkin seeds, unsalted                                                                 | 100                | 5                  | B           | 1             |
| 43102000 | 4000_LegNut | Sunflower seeds, plain, unsalted                                                        | 100                | 5                  | A           | 3             |
| 43102100 | 4000_LegNut | Sunflower seeds, plain, salted                                                          | 100                | 4.5                | B           | 3             |
| 43102300 | 4000_LegNut | Sunflower seeds, flavored                                                               | 100                | 4.5                | C           | 3             |
| 43102400 | 4000_LegNut | Sunflower seeds, NFS                                                                    | 100                | 5                  | A           | 3             |
| 43103000 | 4000_LegNut | Sesame seeds                                                                            | 100                | 5                  | A           | 1             |
| 43103300 | 4000_LegNut | Tahini                                                                                  | 100                | 5                  | B           | 1             |
| 43104000 | 4000_LegNut | Flax seeds                                                                              | 100                | 5                  | A           | 1             |
| 43107000 | 4000_LegNut | Mixed seeds                                                                             | 100                | 5                  | A           | 3             |
| 43108010 | 4000_LegNut | Chia seeds                                                                              | 100                | 5                  | A           | 1             |
| 41301020 | 4000_LegNut | Cowpeas, dry, cooked, fat not added in cooking                                          | 99                 | 5                  | A           | 3             |
| 42112000 | 4000_LegNut | Pecans, NFS                                                                             | 99                 | 4.5                | A           | 1             |
| 42200510 | 4000_LegNut | Almond butter, lower sodium                                                             | 99                 | 5                  | B           | 3             |
| 41102020 | 4000_LegNut | Black, brown, or Bayo beans, dry, cooked, fat not added in cooking                      | 99                 | 5                  | A           | 3             |
| 41103020 | 4000_LegNut | Lima beans, dry, cooked, fat not added in cooking                                       | 99                 | 5                  | A           | 3             |
| 42112100 | 4000_LegNut | Pecans, unroasted                                                                       | 98                 | 4.5                | A           | 1             |
| 42112210 | 4000_LegNut | Pecans, unsalted                                                                        | 98                 | 4.5                | A           | 1             |
| 42102000 | 4000_LegNut | Brazil nuts                                                                             | 98                 | 4                  | C           | 1             |
| 42101120 | 4000_LegNut | Almonds, lightly salted                                                                 | 98                 | 5                  | A           | 3             |
| 41221020 | 4000_LegNut | Chili with beans, without meat                                                          | 97                 | 4.5                | A           | 3             |
| 42200500 | 4000_LegNut | Almond butter                                                                           | 97                 | 5                  | B           | 3             |
| 42500100 | 4000_LegNut | Trail mix with nuts                                                                     | 97                 | 4.5                | B           | 3             |
| 42110150 | 4000_LegNut | Mixed nuts, without peanuts, salted                                                     | 97                 | 4                  | B           | 3             |
| 41202505 | 4000_LegNut | Beans and tomatoes, fat not added in cooking                                            | 96                 | 5                  | A           | 3             |
| 42111110 | 4000_LegNut | Peanuts, roasted, unsalted                                                              | 96                 | 5                  | B           | 3             |
| 41101020 | 4000_LegNut | Beans, dry, cooked, NS as to type, fat not added in cooking                             | 96                 | 5                  | A           | 3             |
| 42105000 | 4000_LegNut | Chestnuts                                                                               | 96                 | 4.5                | A           | 1             |
| 41104020 | 4000_LegNut | Pinto, calico, or red Mexican beans, dry, cooked, fat not added in cooking              | 96                 | 5                  | A           | 3             |
| 42110110 | 4000_LegNut | Mixed nuts, with peanuts, lightly salted                                                | 95                 | 4.5                | B           | 3             |
| 42101110 | 4000_LegNut | Almonds, salted                                                                         | 95                 | 5                  | B           | 3             |
| 42114142 | 4000_LegNut | Pistachio nuts, lightly salted                                                          | 95                 | 5                  | B           | 3             |
| 42104050 | 4000_LegNut | Cashews, unroasted                                                                      | 94                 | 4                  | C           | 1             |
| 42101300 | 4000_LegNut | Almonds, flavored                                                                       | 94                 | 5                  | B           | 3             |
| 42104000 | 4000_LegNut | Cashews, NFS                                                                            | 94                 | 4                  | C           | 1             |
| 41410010 | 4000_LegNut | Soy nuts                                                                                | 94                 | 5                  | A           | 3             |
| 41101120 | 4000_LegNut | White beans, dry, cooked, fat not added in cooking                                      | 94                 | 5                  | A           | 3             |
| 42111210 | 4000_LegNut | Peanuts, dry roasted, unsalted                                                          | 93                 | 5                  | B           | 3             |
| 43101100 | 4000_LegNut | Pumpkin seeds, salted                                                                   | 93                 | 4.5                | C           | 3             |
| 42100050 | 4000_LegNut | Nuts, NFS                                                                               | 93                 | 4.5                | C           | 3             |
| 42110000 | 4000_LegNut | Mixed nuts, NFS                                                                         | 93                 | 4.5                | C           | 3             |
| 42110100 | 4000_LegNut | Mixed nuts, with peanuts, salted                                                        | 93                 | 4.5                | C           | 3             |
| 41103060 | 4000_LegNut | Pink beans, dry, cooked, fat not added in cooking                                       | 92                 | 5                  | A           | 3             |
| 42114140 | 4000_LegNut | Pistachio nuts, salted                                                                  | 92                 | 5                  | B           | 3             |
| 41108000 | 4000_LegNut | Mung beans, dry, cooked, fat not added in cooking                                       | 92                 | 5                  | A           | 3             |
| 41812000 | 4000_LegNut | Sandwich spread, meat substitute type                                                   | 92                 | 4                  | A           | 4             |
| 42104110 | 4000_LegNut | Cashews, unsalted                                                                       | 91                 | 4                  | C           | 3             |
| 41304991 | 4000_LegNut | Lentils, dry, cooked, made with oil                                                     | 90                 | 5                  | A           | 4             |
| 41303000 | 4000_LegNut | Green or yellow split peas, dry, cooked, fat not added in cooking                       | 90                 | 5                  | A           | 3             |
| 41304980 | 4000_LegNut | Lentils, dry, cooked, NS as to fat added in cooking                                     | 90                 | 5                  | A           | 4             |
| 41304990 | 4000_LegNut | Lentils, dry, cooked, fat added in cooking, NS as to type of fat                        | 90                 | 5                  | A           | 4             |
| 41107010 | 4000_LegNut | Soybeans, dry, cooked, fat added in cooking                                             | 89                 | 5                  | A           | 4             |
| 41107020 | 4000_LegNut | Soybeans, dry, cooked, NS as to fat added in cooking                                    | 89                 | 5                  | A           | 4             |
| 41102120 | 4000_LegNut | Black, brown, or Bayo beans, canned, drained, low sodium, fat not added in cooking      | 89                 | 5                  | A           | 4             |
| 41304993 | 4000_LegNut | Lentils, dry, cooked, made with margarine                                               | 89                 | 5                  | A           | 4             |
| 41102220 | 4000_LegNut | Fava beans, dry, cooked, fat not added in cooking                                       | 89                 | 5                  | A           | 3             |
| 42111100 | 4000_LegNut | Peanuts, roasted, salted                                                                | 88                 | 4.5                | C           | 3             |
| 41421010 | 4000_LegNut | Soybean curd, deep fried                                                                | 88                 | 4.5                | A           | 3             |
| 41812600 | 4000_LegNut | Vegetarian, fillet                                                                      | 88                 | 4                  | B           | 4             |
| 42202010 | 4000_LegNut | Peanut butter, lower sodium                                                             | 88                 | 4                  | C           | 3             |
| 42111205 | 4000_LegNut | Peanuts, dry roasted, lightly salted                                                    | 87                 | 5                  | B           | 3             |
| 41102100 | 4000_LegNut | Black, brown, or Bayo beans, canned, drained, low sodium, NS as to fat added in cooking | 87                 | 5                  | A           | 4             |
| 41102110 | 4000_LegNut | Black, brown, or Bayo beans, canned, drained, low sodium, fat added in cooking          | 87                 | 5                  | A           | 4             |
| 41103100 | 4000_LegNut | Pink beans, canned, drained, fat not added in cooking                                   | 87                 | 5                  | A           | 3             |

Supplementary Table 8. Original (uncorrected) scores for all food items.

|          |             |                                                                                                  |    |     |   |   |
|----------|-------------|--------------------------------------------------------------------------------------------------|----|-----|---|---|
| 41106000 | 4000_LegNut | Red kidney beans, dry, cooked, NS as to fat added in cooking                                     | 86 | 5   | A | 4 |
| 41106010 | 4000_LegNut | Red kidney beans, dry, cooked, fat added in cooking, NS as to type of fat                        | 86 | 5   | A | 4 |
| 41301000 | 4000_LegNut | Cowpeas, dry, cooked, NS as to fat added in cooking                                              | 86 | 5   | A | 4 |
| 41301010 | 4000_LegNut | Cowpeas, dry, cooked, fat added in cooking                                                       | 86 | 5   | A | 4 |
| 41812450 | 4000_LegNut | Vegetarian chili, made with meat substitute                                                      | 86 | 5   | A | 4 |
| 41106011 | 4000_LegNut | Red kidney beans, dry, cooked, made with oil                                                     | 86 | 5   | A | 4 |
| 41102000 | 4000_LegNut | Black, brown, or Bayo beans, dry, cooked, NS as to fat added in cooking                          | 86 | 5   | A | 4 |
| 41102010 | 4000_LegNut | Black, brown, or Bayo beans, dry, cooked, fat added in cooking, NS as to type of fat             | 86 | 5   | A | 4 |
| 42202100 | 4000_LegNut | Peanut butter, lower sodium and lower sugar                                                      | 86 | 4   | C | 3 |
| 41311000 | 4000_LegNut | Papad, grilled or broiled                                                                        | 86 | 4.5 | B | 3 |
| 41104011 | 4000_LegNut | Pinto, calico, or red Mexican beans, dry, cooked, made with oil                                  | 86 | 5   | A | 4 |
| 41101000 | 4000_LegNut | Beans, dry, cooked, NS as to type and as to fat added in cooking                                 | 85 | 5   | A | 4 |
| 41101010 | 4000_LegNut | Beans, dry, cooked, NS as to type, fat added in cooking                                          | 85 | 5   | A | 4 |
| 41104000 | 4000_LegNut | Pinto, calico, or red Mexican beans, dry, cooked, NS as to fat added in cooking                  | 85 | 5   | A | 4 |
| 41104010 | 4000_LegNut | Pinto, calico, or red Mexican beans, dry, cooked, fat added in cooking, NS as to type of fat     | 85 | 5   | A | 4 |
| 41102011 | 4000_LegNut | Black, brown, or Bayo beans, dry, cooked, made with oil                                          | 85 | 5   | A | 4 |
| 41103011 | 4000_LegNut | Lima beans, dry, cooked, made with oil                                                           | 85 | 5   | A | 4 |
| 42202130 | 4000_LegNut | Peanut butter, lower sugar                                                                       | 85 | 4   | E | 3 |
| 41106120 | 4000_LegNut | Red kidney beans, canned, drained, low sodium, fat not added in cooking                          | 85 | 5   | A | 4 |
| 42104105 | 4000_LegNut | Cashews, lightly salted                                                                          | 84 | 3.5 | C | 3 |
| 41103000 | 4000_LegNut | Lima beans, dry, cooked, NS as to fat added in cooking                                           | 84 | 5   | A | 4 |
| 41103010 | 4000_LegNut | Lima beans, dry, cooked, fat added in cooking, NS as to type of fat                              | 84 | 5   | A | 4 |
| 41202500 | 4000_LegNut | Beans and tomatoes, NS as to fat added in cooking                                                | 84 | 5   | A | 4 |
| 41202510 | 4000_LegNut | Beans and tomatoes, fat added in cooking                                                         | 84 | 5   | A | 4 |
| 41106520 | 4000_LegNut | Yellow, canary, or Peruvian beans, dry, cooked, fat not added in cooking                         | 83 | 5   | A | 4 |
| 41103013 | 4000_LegNut | Lima beans, dry, cooked, made with margarine                                                     | 83 | 5   | A | 4 |
| 41101111 | 4000_LegNut | White beans, dry, cooked, made with oil                                                          | 83 | 5   | A | 4 |
| 41106100 | 4000_LegNut | Red kidney beans, canned, drained, low sodium, NS as to fat added in cooking                     | 83 | 5   | A | 4 |
| 41106110 | 4000_LegNut | Red kidney beans, canned, drained, low sodium, fat added in cooking                              | 83 | 5   | A | 4 |
| 41106013 | 4000_LegNut | Red kidney beans, dry, cooked, made with margarine                                               | 83 | 5   | A | 4 |
| 42111000 | 4000_LegNut | Peanuts, NFS                                                                                     | 83 | 4.5 | C | 3 |
| 42111200 | 4000_LegNut | Peanuts, dry roasted, salted                                                                     | 83 | 4.5 | C | 3 |
| 41101100 | 4000_LegNut | White beans, dry, cooked, NS as to fat added in cooking                                          | 83 | 5   | A | 4 |
| 41101110 | 4000_LegNut | White beans, dry, cooked, fat added in cooking, NS as to type of fat                             | 83 | 5   | A | 4 |
| 41106500 | 4000_LegNut | Yellow, canary, or Peruvian beans, dry, cooked, NS as to fat added in cooking                    | 83 | 5   | A | 4 |
| 41106510 | 4000_LegNut | Yellow, canary, or Peruvian beans, dry, cooked, fat added in cooking, NS as to type of fat       | 83 | 5   | A | 4 |
| 41106511 | 4000_LegNut | Yellow, canary, or Peruvian beans, dry, cooked, made with oil                                    | 83 | 5   | A | 4 |
| 42200600 | 4000_LegNut | Almond paste                                                                                     | 83 | 4   | D | 3 |
| 41103050 | 4000_LegNut | Pink beans, dry, cooked, NS as to fat added in cooking                                           | 83 | 5   | A | 4 |
| 41103070 | 4000_LegNut | Pink beans, dry, cooked, fat added in cooking                                                    | 83 | 5   | A | 4 |
| 41104100 | 4000_LegNut | Pinto, calico, or red Mexican beans, canned, drained, low sodium, NS as to fat added in cooking  | 82 | 5   | A | 4 |
| 41104110 | 4000_LegNut | Pinto, calico, or red Mexican beans, canned, drained, low sodium, fat added in cooking           | 82 | 5   | A | 4 |
| 41104120 | 4000_LegNut | Pinto, calico, or red Mexican beans, canned, drained, low sodium, fat not added in cooking       | 82 | 5   | A | 4 |
| 41102080 | 4000_LegNut | Black, brown, or Bayo beans, canned, drained, fat not added in cooking                           | 82 | 5   | A | 4 |
| 41102030 | 4000_LegNut | Black, brown, or Bayo beans, canned, drained, NS as to fat added in cooking                      | 82 | 5   | A | 4 |
| 41102040 | 4000_LegNut | Black, brown, or Bayo beans, canned, drained, fat added in cooking, NS as to type of fat         | 82 | 5   | A | 4 |
| 41102050 | 4000_LegNut | Black, brown, or Bayo beans, canned, drained, made with oil                                      | 82 | 5   | A | 4 |
| 42104100 | 4000_LegNut | Cashews, salted                                                                                  | 82 | 3.5 | C | 3 |
| 41102013 | 4000_LegNut | Black, brown, or Bayo beans, dry, cooked, made with margarine                                    | 82 | 5   | A | 4 |
| 41302120 | 4000_LegNut | Chickpeas, canned, drained, low sodium, fat not added in cooking                                 | 82 | 5   | A | 4 |
| 41205015 | 4000_LegNut | Refried beans, fat not added in cooking                                                          | 81 | 5   | A | 3 |
| 41101113 | 4000_LegNut | White beans, dry, cooked, made with margarine                                                    | 81 | 5   | A | 4 |
| 41302020 | 4000_LegNut | Chickpeas, dry, cooked, fat not added in cooking                                                 | 81 | 5   | A | 4 |
| 41104013 | 4000_LegNut | Pinto, calico, or red Mexican beans, dry, cooked, made with margarine                            | 81 | 5   | A | 4 |
| 41108010 | 4000_LegNut | Mung beans, dry, cooked, fat added in cooking                                                    | 81 | 5   | A | 4 |
| 41108020 | 4000_LegNut | Mung beans, dry, cooked, NS as to fat added in cooking                                           | 81 | 5   | A | 4 |
| 42202150 | 4000_LegNut | Peanut butter, reduced fat                                                                       | 81 | 4   | C | 3 |
| 41302100 | 4000_LegNut | Chickpeas, canned, drained, low sodium, NS as to fat added in cooking                            | 80 | 5   | A | 4 |
| 41302110 | 4000_LegNut | Chickpeas, canned, drained, low sodium, fat added in cooking                                     | 80 | 5   | A | 4 |
| 41102070 | 4000_LegNut | Black, brown, or Bayo beans, canned, drained, made with margarine                                | 80 | 5   | A | 4 |
| 41303011 | 4000_LegNut | Green or yellow split peas, dry, cooked, made with oil                                           | 80 | 5   | A | 4 |
| 41812900 | 4000_LegNut | Vegetarian meat loaf                                                                             | 80 | 4   | A | 4 |
| 41303013 | 4000_LegNut | Green or yellow split peas, dry, cooked, made with margarine                                     | 80 | 5   | A | 4 |
| 42111030 | 4000_LegNut | Peanuts, boiled                                                                                  | 80 | 4.5 | A | 3 |
| 42101350 | 4000_LegNut | Almonds, honey roasted                                                                           | 80 | 4   | D | 3 |
| 41303010 | 4000_LegNut | Green or yellow split peas, dry, cooked, fat added in cooking, NS as to type of fat              | 79 | 5   | A | 4 |
| 41303020 | 4000_LegNut | Green or yellow split peas, dry, cooked, NS as to fat added in cooking                           | 79 | 5   | A | 4 |
| 41103090 | 4000_LegNut | Pink beans, canned, drained, fat added in cooking                                                | 79 | 5   | A | 4 |
| 42110300 | 4000_LegNut | Mixed nuts, honey roasted                                                                        | 79 | 3.5 | D | 3 |
| 41101050 | 4000_LegNut | Beans, canned, drained, NS as to type and as to fat added in cooking                             | 79 | 5   | A | 4 |
| 41101060 | 4000_LegNut | Beans, canned, drained, NS as to type, fat added in cooking                                      | 79 | 5   | A | 4 |
| 41104030 | 4000_LegNut | Pinto, calico, or red Mexican beans, canned, drained, NS as to fat added in cooking              | 79 | 5   | A | 4 |
| 41104040 | 4000_LegNut | Pinto, calico, or red Mexican beans, canned, drained, fat added in cooking, NS as to type of fat | 79 | 5   | A | 4 |
| 41104050 | 4000_LegNut | Pinto, calico, or red Mexican beans, canned, drained, made with oil                              | 79 | 5   | A | 4 |
| 41106540 | 4000_LegNut | Yellow, canary, or Peruvian beans, canned, drained, fat added in cooking, NS as to type of fat   | 79 | 5   | A | 4 |
| 42112200 | 4000_LegNut | Pecans, salted                                                                                   | 79 | 4   | C | 3 |
| 41302011 | 4000_LegNut | Chickpeas, dry, cooked, made with oil                                                            | 78 | 5   | A | 4 |
| 41108030 | 4000_LegNut | Mung beans, canned, drained, NS as to fat added in cooking                                       | 78 | 5   | A | 4 |
| 41106040 | 4000_LegNut | Red kidney beans, canned, drained, fat added in cooking, NS as to type of fat                    | 78 | 5   | A | 4 |
| 41106050 | 4000_LegNut | Red kidney beans, canned, drained, made with oil                                                 | 78 | 5   | A | 4 |
| 42201000 | 4000_LegNut | Cashew butter                                                                                    | 78 | 3   | C | 3 |
| 41106513 | 4000_LegNut | Yellow, canary, or Peruvian beans, dry, cooked, made with margarine                              | 78 | 5   | A | 4 |
| 41302000 | 4000_LegNut | Chickpeas, dry, cooked, NS as to fat added in cooking                                            | 78 | 5   | A | 4 |
| 41302010 | 4000_LegNut | Chickpeas, dry, cooked, fat added in cooking, NS as to type of fat                               | 78 | 5   | A | 4 |
| 41106080 | 4000_LegNut | Red kidney beans, canned, drained, fat not added in cooking                                      | 77 | 5   | A | 4 |
| 41102200 | 4000_LegNut | Fava beans, dry, cooked, NS as to fat added in cooking                                           | 77 | 5   | A | 4 |

Supplementary Table 8. Original (uncorrected) scores for all food items.

|          |             |                                                                                            |    |     |   |   |
|----------|-------------|--------------------------------------------------------------------------------------------|----|-----|---|---|
| 41102210 | 4000_LegNut | Fava beans, dry, cooked, fat added in cooking                                              | 77 | 5   | A | 4 |
| 42202000 | 4000_LegNut | Peanut butter                                                                              | 77 | 3.5 | C | 3 |
| 41302080 | 4000_LegNut | Chickpeas, canned, drained, fat not added in cooking                                       | 77 | 5   | A | 4 |
| 41101070 | 4000_LegNut | Beans, canned, drained, NS as to type, fat not added in cooking                            | 77 | 5   | A | 4 |
| 41104080 | 4000_LegNut | Pinto, calico, or red Mexican beans, canned, drained, fat not added in cooking             | 77 | 5   | A | 4 |
| 41302030 | 4000_LegNut | Chickpeas, canned, drained, NS as to fat added in cooking                                  | 76 | 5   | A | 4 |
| 41302040 | 4000_LegNut | Chickpeas, canned, drained, fat added in cooking, NS as to type of fat                     | 76 | 5   | A | 4 |
| 41302050 | 4000_LegNut | Chickpeas, canned, drained, made with oil                                                  | 76 | 5   | A | 4 |
| 41104070 | 4000_LegNut | Pinto, calico, or red Mexican beans, canned, drained, made with margarine                  | 76 | 5   | A | 4 |
| 41102260 | 4000_LegNut | Fava beans, canned, drained, fat added in cooking                                          | 76 | 5   | A | 4 |
| 41101200 | 4000_LegNut | White beans, canned, drained, low sodium, NS as to fat added in cooking                    | 76 | 5   | A | 4 |
| 41101210 | 4000_LegNut | White beans, canned, drained, low sodium, fat added in cooking                             | 76 | 5   | A | 4 |
| 42111500 | 4000_LegNut | Peanuts, honey roasted                                                                     | 75 | 4   | C | 3 |
| 41101140 | 4000_LegNut | White beans, canned, drained, fat added in cooking, NS as to type of fat                   | 75 | 5   | A | 4 |
| 41101150 | 4000_LegNut | White beans, canned, drained, made with oil                                                | 75 | 5   | A | 4 |
| 41302013 | 4000_LegNut | Chickpeas, dry, cooked, made with margarine                                                | 74 | 5   | A | 4 |
| 59003000 | 4000_LegNut | Meat substitute, cereal- and vegetable protein-based, fried                                | 73 | 4.5 | A | 4 |
| 41101220 | 4000_LegNut | White beans, canned, drained, low sodium, fat not added in cooking                         | 73 | 5   | A | 4 |
| 41810610 | 4000_LegNut | Chicken, meatless, breaded, fried                                                          | 72 | 4.5 | A | 4 |
| 42109100 | 4000_LegNut | Macadamia nuts                                                                             | 72 | 3.5 | C | 3 |
| 41420050 | 4000_LegNut | Soybean curd cheese                                                                        | 72 | 4   | A | 4 |
| 41205040 | 4000_LegNut | Refried beans, canned, low sodium                                                          | 72 | 5   | A | 4 |
| 41210200 | 4000_LegNut | Black beans, Cuban style                                                                   | 71 | 4.5 | A | 4 |
| 42500000 | 4000_LegNut | Trail mix, NFS                                                                             | 71 | 4   | D | 4 |
| 42501000 | 4000_LegNut | Trail mix with nuts and fruit                                                              | 71 | 4   | D | 4 |
| 41101180 | 4000_LegNut | White beans, canned, drained, fat not added in cooking                                     | 70 | 5   | A | 4 |
| 41205013 | 4000_LegNut | Refried beans, made with margarine                                                         | 69 | 5   | A | 4 |
| 41205011 | 4000_LegNut | Refried beans, made with oil                                                               | 69 | 5   | A | 4 |
| 41205016 | 4000_LegNut | Refried beans, NS as to fat added in cooking                                               | 69 | 5   | A | 4 |
| 41205010 | 4000_LegNut | Refried beans, fat added in cooking, NS as to type of fat                                  | 69 | 5   | A | 4 |
| 41304992 | 4000_LegNut | Lentils, dry, cooked, made with animal fat or meat drippings                               | 69 | 5   | A | 4 |
| 41210150 | 4000_LegNut | Stewed pink beans with white potatoes and ham, Puerto Rican style                          | 68 | 4.5 | A | 4 |
| 41304130 | 4000_LegNut | Cowpeas, dry, cooked with pork                                                             | 68 | 5   | A | 4 |
| 41203030 | 4000_LegNut | Black bean salad                                                                           | 67 | 5   | A | 4 |
| 41811600 | 4000_LegNut | Luncheon slice, meatless-beef, chicken, salami or turkey                                   | 67 | 3.5 | C | 4 |
| 41210100 | 4000_LegNut | Stewed red beans, Puerto Rican style                                                       | 66 | 4.5 | A | 4 |
| 41207030 | 4000_LegNut | Beans, dry, cooked with ground beef                                                        | 66 | 5   | A | 4 |
| 41201020 | 4000_LegNut | Baked beans, vegetarian                                                                    | 65 | 4.5 | A | 3 |
| 41811800 | 4000_LegNut | Meatball, meatless                                                                         | 65 | 4   | A | 4 |
| 41304030 | 4000_LegNut | Peas, dry, cooked with pork                                                                | 65 | 5   | A | 4 |
| 41811400 | 4000_LegNut | Frankfurter or hot dog, meatless                                                           | 64 | 4   | A | 4 |
| 42502100 | 4000_LegNut | Trail mix with pretzels, cereal, or granola                                                | 64 | 4   | D | 4 |
| 41209000 | 4000_LegNut | Falafel                                                                                    | 63 | 4   | D | 4 |
| 41810400 | 4000_LegNut | Breakfast link, pattie, or slice, meatless                                                 | 63 | 2   | D | 4 |
| 41208100 | 4000_LegNut | Beans, dry, cooked with pork                                                               | 63 | 5   | A | 4 |
| 42116100 | 4000_LegNut | Walnuts, honey roasted                                                                     | 63 | 3   | D | 4 |
| 41103012 | 4000_LegNut | Lima beans, dry, cooked, made with animal fat or meat drippings                            | 62 | 5   | A | 4 |
| 41811890 | 4000_LegNut | Vegetarian burger or patty, meatless, no bun                                               | 62 | 4   | A | 4 |
| 41205017 | 4000_LegNut | Refried beans, from restaurant                                                             | 62 | 5   | A | 4 |
| 41106012 | 4000_LegNut | Red kidney beans, dry, cooked, made with animal fat or meat drippings                      | 62 | 5   | A | 4 |
| 42501500 | 4000_LegNut | Trail mix with chocolate                                                                   | 62 | 3.5 | D | 4 |
| 41102012 | 4000_LegNut | Black, brown, or Bayo beans, dry, cooked, made with animal fat or meat drippings           | 61 | 5   | A | 4 |
| 41101112 | 4000_LegNut | White beans, dry, cooked, made with animal fat or meat drippings                           | 60 | 5   | A | 4 |
| 41104012 | 4000_LegNut | Pinto, calico, or red Mexican beans, dry, cooked, made with animal fat or meat drippings   | 60 | 5   | A | 4 |
| 41810200 | 4000_LegNut | Bacon strip, meatless                                                                      | 60 | 1   | D | 4 |
| 41310160 | 4000_LegNut | Stewed chickpeas, with potatoes, Puerto Rican style                                        | 60 | 5   | A | 4 |
| 41102060 | 4000_LegNut | Black, brown, or Bayo beans, canned, drained, made with animal fat or meat drippings       | 60 | 5   | A | 4 |
| 41303012 | 4000_LegNut | Green or yellow split peas, dry, cooked, made with animal fat or meat drippings            | 59 | 5   | A | 4 |
| 41205030 | 4000_LegNut | Refried beans with meat                                                                    | 59 | 5   | A | 4 |
| 41106512 | 4000_LegNut | Yellow, canary, or Peruvian beans, dry, cooked, made with animal fat or meat drippings     | 59 | 5   | A | 4 |
| 41310150 | 4000_LegNut | Stewed chickpeas, Puerto Rican style                                                       | 59 | 4.5 | A | 4 |
| 42104500 | 4000_LegNut | Cashews, honey roasted                                                                     | 59 | 3.5 | E | 4 |
| 42112300 | 4000_LegNut | Pecans, honey roasted                                                                      | 59 | 3   | D | 4 |
| 41810600 | 4000_LegNut | Chicken, meatless, NFS                                                                     | 57 | 4   | B | 4 |
| 41811950 | 4000_LegNut | Swiss steak, with gravy, meatless                                                          | 57 | 3.5 | B | 4 |
| 41104060 | 4000_LegNut | Pinto, calico, or red Mexican beans, canned, drained, made with animal fat or meat drippin | 57 | 5   | A | 4 |
| 41306000 | 4000_LegNut | Loaf, lentil                                                                               | 56 | 4.5 | A | 4 |
| 41302012 | 4000_LegNut | Chickpeas, dry, cooked, made with animal fat or meat drippings                             | 56 | 5   | A | 4 |
| 41310220 | 4000_LegNut | Fried chickpeas with bacon, Puerto Rican style                                             | 55 | 4.5 | A | 4 |
| 41205020 | 4000_LegNut | Refried beans with cheese                                                                  | 54 | 4.5 | A | 4 |
| 41205012 | 4000_LegNut | Refried beans, made with animal fat or meat drippings                                      | 54 | 5   | A | 4 |
| 42203000 | 4000_LegNut | Peanut butter and jelly                                                                    | 51 | 3.5 | D | 4 |
| 41310210 | 4000_LegNut | Stewed chickpeas with Spanish sausages, Puerto Rican style                                 | 50 | 4   | B | 4 |
| 42106000 | 4000_LegNut | Coconut, fresh                                                                             | 50 | 2   | C | 1 |
| 41812800 | 4000_LegNut | Vegetarian stew                                                                            | 49 | 4.5 | B | 4 |
| 42203100 | 4000_LegNut | Peanut butter and chocolate spread                                                         | 45 | 3   | E | 4 |
| 41201010 | 4000_LegNut | Baked beans, NFS                                                                           | 44 | 4.5 | A | 4 |
| 41204020 | 4000_LegNut | Boston baked beans                                                                         | 44 | 4.5 | A | 4 |
| 41208030 | 4000_LegNut | Pork and beans                                                                             | 44 | 4.5 | A | 4 |
| 41202020 | 4000_LegNut | Chili beans, barbecue beans, ranch style beans or Mexican- style beans                     | 43 | 4.5 | A | 4 |
| 41310200 | 4000_LegNut | Chickpeas stewed with pig's feet, Puerto Rican style                                       | 43 | 4.5 | A | 4 |
| 41812850 | 4000_LegNut | Vegetarian stroganoff                                                                      | 42 | 3   | C | 4 |
| 41210090 | 4000_LegNut | Stewed beans with pork, tomatoes, and chili peppers, Mexican style                         | 39 | 4.5 | B | 4 |
| 41210160 | 4000_LegNut | Stewed pink beans with pig's feet, Puerto Rican style                                      | 38 | 4.5 | A | 4 |
| 41304000 | 4000_LegNut | Wasabi peas                                                                                | 37 | 4   | D | 4 |
| 41210170 | 4000_LegNut | Stewed red beans with pig's feet, Puerto Rican style                                       | 37 | 4.5 | A | 4 |

Supplementary Table 8. Original (uncorrected) scores for all food items.

|          |             |                                                                   |    |     |   |   |
|----------|-------------|-------------------------------------------------------------------|----|-----|---|---|
| 41210190 | 4000_LegNut | Stewed red beans with pig's feet and potatoes, Puerto Rican style | 36 | 4.5 | A | 4 |
| 41421020 | 4000_LegNut | Soybean curd, breaded, fried                                      | 33 | 3.5 | A | 4 |
| 41901020 | 4000_LegNut | Soyburger, meatless, with cheese on bun                           | 31 | 3.5 | C | 4 |
| 41812400 | 4000_LegNut | Vegetarian pot pie                                                | 25 | 3.5 | B | 4 |
| 41206030 | 4000_LegNut | Beans and franks                                                  | 25 | 4.5 | A | 4 |
| 42106020 | 4000_LegNut | Coconut, packaged                                                 | 22 | 0.5 | E | 3 |
| 41210000 | 4000_LegNut | Bean cake                                                         | 17 | 3.5 | C | 4 |

Supplementary Table 8. Original (uncorrected) scores for all food items.

| foodcode | level1nd | Description                                                                                         | Food Compass Score | Health Star Rating | Nutri-Score | NOVA Category |
|----------|----------|-----------------------------------------------------------------------------------------------------|--------------------|--------------------|-------------|---------------|
| 25110420 | 5000_MPE | Chicken liver, braised                                                                              | 73                 | 4                  | C           | 3             |
| 24402100 | 5000_MPE | Dove, cooked, NS as to cooking method                                                               | 66                 | 4                  | B           | 3             |
| 33401210 | 5000_MPE | Egg substitute, omelet, scrambled, or fried, with vegetables, fat not added in cooking              | 65                 | 3.5                | A           | 3             |
| 25120000 | 5000_MPE | Heart, cooked                                                                                       | 65                 | 4                  | B           | 3             |
| 33401200 | 5000_MPE | Egg substitute, omelet, scrambled, or fried, with vegetables, fat added in cooking                  | 64                 | 3.5                | B           | 4             |
| 33401220 | 5000_MPE | Egg substitute, omelet, scrambled, or fried, with vegetables, NS as to fat added in cooking         | 64                 | 3.5                | B           | 4             |
| 25110120 | 5000_MPE | Beef liver, braised                                                                                 | 64                 | 4                  | C           | 3             |
| 24403100 | 5000_MPE | Quail, cooked                                                                                       | 63                 | 4                  | B           | 3             |
| 31101010 | 5000_MPE | Egg, whole, raw                                                                                     | 62                 | 4                  | B           | 1             |
| 25130000 | 5000_MPE | Kidney, cooked                                                                                      | 62                 | 4                  | B           | 3             |
| 33001010 | 5000_MPE | Egg substitute, omelet, scrambled, or fried, made with oil                                          | 62                 | 3.5                | B           | 4             |
| 33001100 | 5000_MPE | Egg substitute, cheese flavored, omelet, scrambled, or fried, fat added in cooking                  | 62                 | 3.5                | B           | 4             |
| 33001120 | 5000_MPE | Egg substitute, cheese flavored, omelet, scrambled, or fried, NS as to fat added in cooking         | 62                 | 3.5                | B           | 4             |
| 33001200 | 5000_MPE | Egg substitute, vegetable flavored, omelet, scrambled, or fried, fat added in cooking               | 62                 | 3.5                | B           | 4             |
| 33001220 | 5000_MPE | Egg substitute, vegetable flavored, omelet, scrambled, or fried, NS as to fat added in cooking      | 62                 | 3.5                | B           | 4             |
| 24123301 | 5000_MPE | Chicken breast, grilled without sauce, skin not eaten                                               | 61                 | 4                  | B           | 3             |
| 24124201 | 5000_MPE | Chicken breast, sauteed, skin not eaten                                                             | 61                 | 4                  | B           | 3             |
| 24127501 | 5000_MPE | Chicken breast, baked, coated, skin / coating not eaten                                             | 61                 | 4                  | B           | 3             |
| 31110010 | 5000_MPE | Egg, yolk only, raw                                                                                 | 61                 | 2                  | D           | 1             |
| 24198720 | 5000_MPE | Chicken, ground                                                                                     | 60                 | 4                  | C           | 3             |
| 24207000 | 5000_MPE | Turkey, ground                                                                                      | 60                 | 4                  | C           | 3             |
| 24122161 | 5000_MPE | Chicken breast, baked, broiled, or roasted with marinade, skin not eaten, from raw                  | 60                 | 4                  | B           | 3             |
| 24122151 | 5000_MPE | Chicken breast, baked or broiled, skin not eaten, from fast food / restaurant                       | 60                 | 4                  | B           | 3             |
| 32400300 | 5000_MPE | Egg white, omelet, scrambled, or fried, with vegetables, fat added in cooking                       | 59                 | 3.5                | B           | 4             |
| 32400320 | 5000_MPE | Egg white, omelet, scrambled, or fried, with vegetables, NS as to fat added in cooking              | 59                 | 3.5                | B           | 4             |
| 24103050 | 5000_MPE | Chicken, NS as to part, grilled without sauce, NS as to skin eaten                                  | 59                 | 4                  | B           | 3             |
| 24103060 | 5000_MPE | Chicken, NS as to part, grilled without sauce, skin not eaten                                       | 59                 | 4                  | B           | 3             |
| 24104051 | 5000_MPE | Chicken, NS as to part, sauteed, skin not eaten                                                     | 59                 | 4                  | B           | 3             |
| 25110140 | 5000_MPE | Beef liver, fried                                                                                   | 58                 | 4                  | C           | 3             |
| 23332100 | 5000_MPE | Opossum, cooked                                                                                     | 57                 | 4.5                | B           | 3             |
| 24202500 | 5000_MPE | Turkey, thigh, cooked, skin not eaten                                                               | 57                 | 4                  | C           | 3             |
| 23350100 | 5000_MPE | Ostrich, cooked                                                                                     | 57                 | 4                  | B           | 3             |
| 32103000 | 5000_MPE | Egg salad, made with mayonnaise                                                                     | 57                 | 3                  | D           | 3             |
| 24202010 | 5000_MPE | Turkey, drumstick, cooked, skin not eaten                                                           | 57                 | 4                  | B           | 3             |
| 24202060 | 5000_MPE | Turkey, drumstick, roasted, skin not eaten                                                          | 57                 | 4                  | B           | 3             |
| 24201220 | 5000_MPE | Turkey, dark meat, roasted, skin not eaten                                                          | 57                 | 4                  | C           | 3             |
| 24201320 | 5000_MPE | Turkey, light and dark meat, roasted, skin not eaten                                                | 57                 | 4                  | B           | 3             |
| 24201330 | 5000_MPE | Turkey, light and dark meat, roasted, skin eaten                                                    | 56                 | 4                  | C           | 3             |
| 24402110 | 5000_MPE | Dove, fried                                                                                         | 56                 | 4                  | B           | 3             |
| 23333100 | 5000_MPE | Squirrel, cooked                                                                                    | 56                 | 4.5                | B           | 3             |
| 24142501 | 5000_MPE | Chicken drumstick, grilled without sauce, skin not eaten                                            | 56                 | 4                  | B           | 3             |
| 24144301 | 5000_MPE | Chicken drumstick, sauteed, skin not eaten                                                          | 56                 | 4                  | B           | 3             |
| 24147401 | 5000_MPE | Chicken drumstick, baked, coated, skin / coating not eaten                                          | 56                 | 4                  | B           | 3             |
| 32103030 | 5000_MPE | Egg salad, made with creamy dressing                                                                | 56                 | 3                  | C           | 3             |
| 24202460 | 5000_MPE | Turkey, thigh, cooked, skin eaten                                                                   | 55                 | 4                  | C           | 3             |
| 24201030 | 5000_MPE | Turkey, light meat, skin eaten                                                                      | 55                 | 4                  | C           | 3             |
| 24201130 | 5000_MPE | Turkey, light meat, roasted, skin eaten                                                             | 55                 | 4                  | C           | 3             |
| 41810250 | 5000_MPE | Bacon bits                                                                                          | 55                 | 1.5                | D           | 4             |
| 33401400 | 5000_MPE | Egg substitute, omelet, scrambled, or fried, with cheese and vegetables, fat added in cooking       | 55                 | 3.5                | B           | 4             |
| 33401420 | 5000_MPE | Egg substitute, omelet, scrambled, or fried, with cheese and vegetables, NS as to fat added in cook | 55                 | 3.5                | B           | 4             |
| 24203010 | 5000_MPE | Turkey, wing, cooked, skin not eaten                                                                | 55                 | 4                  | B           | 3             |
| 24123300 | 5000_MPE | Chicken breast, grilled without sauce, skin eaten                                                   | 55                 | 4                  | B           | 3             |
| 24124200 | 5000_MPE | Chicken breast, sauteed, skin eaten                                                                 | 55                 | 4                  | B           | 3             |
| 24201000 | 5000_MPE | Turkey, NFS                                                                                         | 55                 | 4                  | B           | 3             |
| 24201020 | 5000_MPE | Turkey, light meat, skin not eaten                                                                  | 55                 | 4                  | B           | 3             |
| 24201120 | 5000_MPE | Turkey, light meat, roasted, skin not eaten                                                         | 55                 | 4                  | B           | 3             |
| 24127201 | 5000_MPE | Chicken breast, fried, coated, skin / coating not eaten, from raw                                   | 54                 | 4                  | B           | 3             |
| 24127211 | 5000_MPE | Chicken breast, fried, coated, skin / coating not eaten, from pre-cooked                            | 54                 | 4                  | B           | 3             |
| 24142321 | 5000_MPE | Chicken drumstick, baked or broiled, skin not eaten, from fast food / restaurant                    | 54                 | 4                  | C           | 3             |
| 24198670 | 5000_MPE | Chicken, chicken roll, roasted                                                                      | 54                 | 4                  | B           | 3             |
| 31102000 | 5000_MPE | Egg, whole, cooked, NS as to cooking method                                                         | 54                 | 3.5                | C           | 3             |
| 24134101 | 5000_MPE | Chicken leg, drumstick and thigh, grilled without sauce, skin not eaten                             | 54                 | 4                  | C           | 3             |
| 24134301 | 5000_MPE | Chicken leg, drumstick and thigh, sauteed, skin not eaten                                           | 54                 | 4                  | C           | 3             |
| 24137311 | 5000_MPE | Chicken leg, drumstick and thigh, baked, coated, skin / coating not eaten                           | 54                 | 4                  | C           | 3             |
| 24201230 | 5000_MPE | Turkey, dark meat, roasted, skin eaten                                                              | 54                 | 4                  | C           | 3             |
| 25140110 | 5000_MPE | Sweetbreads, cooked                                                                                 | 54                 | 4                  | B           | 3             |
| 24122150 | 5000_MPE | Chicken breast, baked or broiled, skin eaten, from fast food / restaurant                           | 53                 | 4                  | C           | 3             |
| 24122160 | 5000_MPE | Chicken breast, baked, broiled, or roasted with marinade, skin eaten, from raw                      | 53                 | 4                  | C           | 3             |
| 32102000 | 5000_MPE | Egg, deviled                                                                                        | 53                 | 3                  | C           | 3             |
| 24102000 | 5000_MPE | Chicken, NS as to part, baked, broiled, or roasted, NS as to skin eaten                             | 53                 | 4                  | B           | 3             |
| 24102020 | 5000_MPE | Chicken, NS as to part, baked, broiled, or roasted, skin not eaten                                  | 53                 | 4                  | B           | 3             |
| 24142301 | 5000_MPE | Chicken drumstick, baked, broiled, or roasted, skin not eaten, from raw                             | 53                 | 4                  | B           | 3             |
| 24205100 | 5000_MPE | Turkey, back                                                                                        | 53                 | 3.5                | D           | 3             |
| 24154011 | 5000_MPE | Chicken thigh, grilled without sauce, skin not eaten                                                | 53                 | 4                  | C           | 3             |
| 24154301 | 5000_MPE | Chicken thigh, sauteed, skin not eaten                                                              | 53                 | 4                  | C           | 3             |
| 24157401 | 5000_MPE | Chicken thigh, baked, coated, skin / coating not eaten                                              | 53                 | 4                  | C           | 3             |
| 24201360 | 5000_MPE | Turkey, light or dark meat, fried, coated, skin not eaten                                           | 53                 | 4                  | B           | 3             |
| 24123120 | 5000_MPE | Chicken breast, stewed, skin not eaten                                                              | 53                 | 4.5                | A           | 3             |
| 24107081 | 5000_MPE | Chicken, NS as to part, baked, coated, skin / coating not eaten                                     | 53                 | 4                  | C           | 3             |
| 24122131 | 5000_MPE | Chicken breast, baked, broiled, or roasted, skin not eaten, from raw                                | 52                 | 4                  | B           | 3             |
| 32103020 | 5000_MPE | Egg salad, made with mayonnaise-type salad dressing                                                 | 52                 | 3                  | C           | 3             |
| 24400020 | 5000_MPE | Cornish game hen, cooked, skin not eaten                                                            | 52                 | 4                  | B           | 3             |
| 24401020 | 5000_MPE | Cornish game hen, roasted, skin not eaten                                                           | 52                 | 4                  | B           | 3             |
| 24132231 | 5000_MPE | Chicken leg, drumstick and thigh, baked or broiled, skin not eaten                                  | 52                 | 4                  | B           | 3             |
| 24103000 | 5000_MPE | Chicken, NS as to part, stewed, NS as to skin eaten                                                 | 52                 | 4                  | B           | 3             |

Supplementary Table 8. Original (uncorrected) scores for all food items.

|          |          |                                                                                                  |    |     |   |   |
|----------|----------|--------------------------------------------------------------------------------------------------|----|-----|---|---|
| 24103020 | 5000_MPE | Chicken, NS as to part, stewed, skin not eaten                                                   | 52 | 4   | B | 3 |
| 24203020 | 5000_MPE | Turkey, wing, cooked, skin eaten                                                                 | 52 | 4   | C | 3 |
| 32400310 | 5000_MPE | Egg white, omelet, scrambled, or fried, with vegetables, fat not added in cooking                | 52 | 4   | A | 3 |
| 24152251 | 5000_MPE | Chicken thigh, baked or broiled, skin not eaten, from fast food / restaurant                     | 52 | 4   | C | 3 |
| 24201370 | 5000_MPE | Turkey, light or dark meat, fried, coated, skin eaten                                            | 52 | 4   | B | 3 |
| 24201410 | 5000_MPE | Turkey, light or dark meat, stewed, skin not eaten                                               | 52 | 4   | B | 3 |
| 24152231 | 5000_MPE | Chicken thigh, baked, broiled, or roasted, skin not eaten, from raw                              | 52 | 4   | B | 3 |
| 24122141 | 5000_MPE | Chicken breast, baked or broiled, skin not eaten, from pre-cooked                                | 51 | 4.5 | A | 3 |
| 32130470 | 5000_MPE | Egg omelet or scrambled egg, with tomatoes and dark-green vegetables, fat not added in cooking   | 51 | 3.5 | B | 4 |
| 32130430 | 5000_MPE | Egg omelet or scrambled egg, with dark-green vegetables, fat added in cooking                    | 51 | 3.5 | B | 4 |
| 32130450 | 5000_MPE | Egg omelet or scrambled egg, with dark-green vegetables, NS as to fat added in cooking           | 51 | 3.5 | B | 4 |
| 24122130 | 5000_MPE | Chicken breast, baked, broiled, or roasted, skin eaten, from raw                                 | 51 | 4   | B | 3 |
| 25150000 | 5000_MPE | Brains, cooked                                                                                   | 51 | 3.5 | B | 3 |
| 24122171 | 5000_MPE | Chicken breast, rotisserie, skin not eaten                                                       | 51 | 4.5 | A | 3 |
| 24120120 | 5000_MPE | Chicken breast, NS as to cooking method, skin not eaten                                          | 51 | 4.5 | A | 3 |
| 24123110 | 5000_MPE | Chicken breast, stewed, skin eaten                                                               | 51 | 4   | B | 3 |
| 31103010 | 5000_MPE | Egg, whole, boiled or poached                                                                    | 51 | 3.5 | C | 1 |
| 25110450 | 5000_MPE | Chicken liver, fried                                                                             | 51 | 3.5 | C | 4 |
| 31111000 | 5000_MPE | Egg, yolk only, cooked, NS as to fat added in cooking                                            | 51 | 1.5 | D | 1 |
| 31111020 | 5000_MPE | Egg, yolk only, cooked, fat added in cooking                                                     | 51 | 1.5 | D | 1 |
| 32130410 | 5000_MPE | Egg omelet or scrambled egg, with tomatoes, fat not added in cooking                             | 51 | 3.5 | B | 4 |
| 24142311 | 5000_MPE | Chicken drumstick, baked or broiled, skin not eaten, from pre-cooked                             | 51 | 4   | B | 3 |
| 24142401 | 5000_MPE | Chicken drumstick, rotisserie, skin not eaten                                                    | 51 | 4   | B | 3 |
| 24140220 | 5000_MPE | Chicken drumstick, NS as to cooking method, skin not eaten                                       | 51 | 4   | B | 3 |
| 24143220 | 5000_MPE | Chicken drumstick, stewed, skin not eaten                                                        | 51 | 4   | B | 3 |
| 24202070 | 5000_MPE | Turkey, drumstick, roasted, skin eaten                                                           | 51 | 4   | C | 3 |
| 32130460 | 5000_MPE | Egg omelet or scrambled egg, with tomatoes and dark-green vegetables, fat added in cooking       | 51 | 3.5 | B | 4 |
| 32130480 | 5000_MPE | Egg omelet or scrambled egg, with tomatoes and dark-green vegetables, NS as to fat added in cool | 51 | 3.5 | B | 4 |
| 24103055 | 5000_MPE | Chicken, NS as to part, grilled without sauce, skin eaten                                        | 51 | 4   | C | 3 |
| 24104049 | 5000_MPE | Chicken, NS as to part, sauteed, skin eaten                                                      | 51 | 4   | C | 3 |
| 24147301 | 5000_MPE | Chicken drumstick, fried, coated, skin / coating not eaten, from raw                             | 50 | 4   | B | 3 |
| 24404100 | 5000_MPE | Pheasant, cooked                                                                                 | 50 | 4   | B | 3 |
| 31105090 | 5000_MPE | Egg, whole, fried, from fast food / restaurant                                                   | 50 | 3.5 | C | 3 |
| 32103015 | 5000_MPE | Egg salad, made with light mayonnaise                                                            | 50 | 3   | C | 3 |
| 32103025 | 5000_MPE | Egg salad, made with light mayonnaise-type salad dressing                                        | 50 | 3   | C | 3 |
| 24300120 | 5000_MPE | Duck, cooked, skin not eaten                                                                     | 50 | 4   | B | 3 |
| 24301020 | 5000_MPE | Duck, roasted, skin not eaten                                                                    | 50 | 4   | B | 3 |
| 24102050 | 5000_MPE | Chicken, NS as to part, rotisserie, NS as to skin eaten                                          | 50 | 4   | B | 3 |
| 24102070 | 5000_MPE | Chicken, NS as to part, rotisserie, skin not eaten                                               | 50 | 4   | B | 3 |
| 24100000 | 5000_MPE | Chicken, NS as to part and cooking method, NS as to skin eaten                                   | 50 | 4   | B | 3 |
| 24100020 | 5000_MPE | Chicken, NS as to part and cooking method, skin not eaten                                        | 50 | 4   | B | 3 |
| 32103045 | 5000_MPE | Egg salad, made with light Italian dressing                                                      | 50 | 3   | C | 3 |
| 31202000 | 5000_MPE | Goose egg, cooked                                                                                | 50 | 3   | D | 3 |
| 32130060 | 5000_MPE | Egg omelet or scrambled egg, made with cooking spray                                             | 50 | 3.5 | C | 3 |
| 32130400 | 5000_MPE | Egg omelet or scrambled egg, with tomatoes, fat added in cooking                                 | 50 | 3.5 | B | 4 |
| 32130420 | 5000_MPE | Egg omelet or scrambled egg, with tomatoes, NS as to fat added in cooking                        | 50 | 3.5 | B | 4 |
| 32130000 | 5000_MPE | Egg omelet or scrambled egg, made with margarine                                                 | 50 | 3   | C | 3 |
| 32400065 | 5000_MPE | Egg white omelet, scrambled, or fried, made with oil                                             | 50 | 3.5 | B | 4 |
| 24202600 | 5000_MPE | Turkey, neck                                                                                     | 50 | 3.5 | C | 3 |
| 24198683 | 5000_MPE | Chicken fillet, grilled                                                                          | 50 | 4   | B | 4 |
| 25112200 | 5000_MPE | Liver paste or pate, chicken                                                                     | 49 | 3.5 | C | 3 |
| 24133220 | 5000_MPE | Chicken leg, drumstick and thigh, stewed, skin not eaten                                         | 49 | 4   | C | 3 |
| 31106000 | 5000_MPE | Egg, whole, baked, NS as to fat added in cooking                                                 | 49 | 3   | C | 3 |
| 31106020 | 5000_MPE | Egg, whole, baked, fat added in cooking                                                          | 49 | 3   | C | 3 |
| 24201420 | 5000_MPE | Turkey light or dark meat, stewed, skin eaten                                                    | 49 | 4   | C | 3 |
| 24142500 | 5000_MPE | Chicken drumstick, grilled without sauce, skin eaten                                             | 49 | 4   | C | 3 |
| 24144300 | 5000_MPE | Chicken drumstick, sauteed, skin eaten                                                           | 49 | 4   | C | 3 |
| 32130070 | 5000_MPE | Egg omelet or scrambled egg, made without fat                                                    | 49 | 3.5 | C | 3 |
| 24147311 | 5000_MPE | Chicken drumstick, fried, coated, skin / coating not eaten, from pre-cooked                      | 49 | 4   | B | 3 |
| 32130490 | 5000_MPE | Egg omelet or scrambled egg, with vegetables other than dark green and/or tomatoes, fat added i  | 49 | 3.5 | B | 4 |
| 32130510 | 5000_MPE | Egg omelet or scrambled egg, with vegetables other than dark green and/or tomatoes, NS as to fat | 49 | 3.5 | B | 4 |
| 24102010 | 5000_MPE | Chicken, NS as to part, baked, broiled, or roasted, skin eaten                                   | 49 | 4   | B | 3 |
| 32110150 | 5000_MPE | Shrimp-egg patty                                                                                 | 49 | 1   | E | 4 |
| 24153220 | 5000_MPE | Chicken thigh, stewed, skin not eaten                                                            | 49 | 4   | C | 3 |
| 32131200 | 5000_MPE | Egg omelet or scrambled egg, with potatoes and/or onions, fat added in cooking                   | 49 | 3.5 | B | 4 |
| 32131220 | 5000_MPE | Egg omelet or scrambled egg, with potatoes and/or onions, NS as to fat added in cooking          | 49 | 3.5 | B | 4 |
| 24137301 | 5000_MPE | Chicken leg, drumstick and thigh, fried, coated, skin / coating not eaten                        | 49 | 4   | B | 3 |
| 31105030 | 5000_MPE | Egg, whole, fried with oil                                                                       | 49 | 3   | D | 3 |
| 32130610 | 5000_MPE | Egg omelet or scrambled egg, with cheese and tomatoes, fat not added in cooking                  | 49 | 3.5 | B | 4 |
| 31106010 | 5000_MPE | Egg, whole, baked, fat not added in cooking                                                      | 49 | 3.5 | B | 3 |
| 32129990 | 5000_MPE | Egg omelet or scrambled egg, NS as to fat added in cooking                                       | 49 | 3   | C | 3 |
| 32130065 | 5000_MPE | Egg omelet or scrambled egg, NS as to type of fat                                                | 49 | 3   | C | 3 |
| 24202020 | 5000_MPE | Turkey, drumstick, cooked, skin eaten                                                            | 49 | 4   | C | 3 |
| 32130500 | 5000_MPE | Egg omelet or scrambled egg, with vegetables other than dark green and/or tomatoes, fat not add  | 48 | 3.5 | B | 4 |
| 25170420 | 5000_MPE | Gizzard, cooked                                                                                  | 48 | 4.5 | B | 3 |
| 24122140 | 5000_MPE | Chicken breast, baked or broiled, skin eaten, from pre-cooked                                    | 48 | 4   | B | 3 |
| 24122170 | 5000_MPE | Chicken breast, rotisserie, skin eaten                                                           | 48 | 4   | B | 3 |
| 24120110 | 5000_MPE | Chicken breast, NS as to cooking method, skin eaten                                              | 48 | 4   | B | 3 |
| 24142300 | 5000_MPE | Chicken drumstick, baked, broiled, or roasted, skin eaten, from raw                              | 48 | 4   | B | 3 |
| 24157301 | 5000_MPE | Chicken thigh, fried, coated, skin / coating not eaten, from raw                                 | 48 | 4   | B | 3 |
| 24132241 | 5000_MPE | Chicken leg, drumstick and thigh, rotisserie, skin not eaten                                     | 48 | 4   | C | 3 |
| 24130220 | 5000_MPE | Chicken leg, drumstick and thigh, NS as to cooking method, skin not eaten                        | 48 | 4   | C | 3 |
| 24142320 | 5000_MPE | Chicken drumstick, baked or broiled, skin eaten, from fast food / restaurant                     | 48 | 3.5 | C | 3 |
| 31201000 | 5000_MPE | Duck egg, cooked                                                                                 | 48 | 3   | D | 3 |
| 32103035 | 5000_MPE | Egg salad, made with light creamy dressing                                                       | 47 | 3.5 | C | 3 |
| 32103040 | 5000_MPE | Egg salad, made with Italian dressing                                                            | 47 | 3   | C | 3 |

Supplementary Table 8. Original (uncorrected) scores for all food items.

|          |          |                                                                                                   |    |     |   |   |
|----------|----------|---------------------------------------------------------------------------------------------------|----|-----|---|---|
| 24103010 | 5000_MPE | Chicken, NS as to part, stewed, skin eaten                                                        | 47 | 4   | B | 3 |
| 24198570 | 5000_MPE | Chicken, canned, meat only                                                                        | 47 | 4   | C | 3 |
| 24206000 | 5000_MPE | Turkey, canned                                                                                    | 47 | 4   | C | 3 |
| 33001000 | 5000_MPE | Egg substitute, omelet, scrambled, or fried, made with margarine                                  | 47 | 3.5 | C | 4 |
| 23323500 | 5000_MPE | Bear, cooked                                                                                      | 47 | 4   | C | 3 |
| 31111010 | 5000_MPE | Egg, yolk only, cooked, fat not added in cooking                                                  | 47 | 1.5 | D | 1 |
| 32130160 | 5000_MPE | Egg omelet or scrambled egg, with cheese, made with cooking spray                                 | 47 | 3   | D | 3 |
| 23335100 | 5000_MPE | Raccoon, cooked                                                                                   | 46 | 4   | C | 3 |
| 24157311 | 5000_MPE | Chicken thigh, fried, coated, skin / coating not eaten, from pre-cooked                           | 46 | 4   | C | 3 |
| 24134100 | 5000_MPE | Chicken leg, drumstick and thigh, grilled without sauce, skin eaten                               | 46 | 3.5 | C | 3 |
| 24134300 | 5000_MPE | Chicken leg, drumstick and thigh, sauteed, skin eaten                                             | 46 | 3.5 | C | 3 |
| 32130700 | 5000_MPE | Egg omelet or scrambled egg, with cheese and vegetables other than dark green and/or tomatoes,    | 46 | 3.5 | B | 4 |
| 24102060 | 5000_MPE | Chicken, NS as to part, rotisserie, skin eaten                                                    | 46 | 4   | B | 3 |
| 24100010 | 5000_MPE | Chicken, NS as to part and cooking method, skin eaten                                             | 46 | 4   | B | 3 |
| 32130170 | 5000_MPE | Egg omelet or scrambled egg, with cheese, made without fat                                        | 46 | 3   | D | 3 |
| 24152241 | 5000_MPE | Chicken thigh, baked or broiled, skin not eaten, from pre-cooked                                  | 46 | 4   | B | 3 |
| 24152301 | 5000_MPE | Chicken thigh, rotisserie, skin not eaten                                                         | 46 | 4   | B | 3 |
| 24150220 | 5000_MPE | Chicken thigh, NS as to cooking method, skin not eaten                                            | 46 | 4   | B | 3 |
| 24107071 | 5000_MPE | Chicken, NS as to part, fried, coated, skin / coating not eaten                                   | 46 | 4   | C | 3 |
| 24132230 | 5000_MPE | Chicken leg, drumstick and thigh, baked or broiled, skin eaten                                    | 45 | 4   | C | 3 |
| 24311010 | 5000_MPE | Goose, wild, roasted                                                                              | 45 | 3.5 | D | 3 |
| 32130440 | 5000_MPE | Egg omelet or scrambled egg, with dark-green vegetables, fat not added in cooking                 | 45 | 3.5 | B | 4 |
| 32130010 | 5000_MPE | Egg omelet or scrambled egg, made with oil                                                        | 45 | 3   | C | 4 |
| 31107000 | 5000_MPE | Egg, whole, pickled                                                                               | 45 | 3.5 | C | 3 |
| 24143210 | 5000_MPE | Chicken drumstick, stewed, skin eaten                                                             | 45 | 4   | C | 3 |
| 31108010 | 5000_MPE | Egg, white only, raw                                                                              | 45 | 4   | A | 1 |
| 24142310 | 5000_MPE | Chicken drumstick, baked or broiled, skin eaten, from pre-cooked                                  | 45 | 4   | C | 3 |
| 24142400 | 5000_MPE | Chicken drumstick, rotisserie, skin eaten                                                         | 45 | 4   | C | 3 |
| 24140210 | 5000_MPE | Chicken drumstick, NS as to cooking method, skin eaten                                            | 45 | 4   | C | 3 |
| 24154010 | 5000_MPE | Chicken thigh, grilled without sauce, skin eaten                                                  | 45 | 3.5 | D | 3 |
| 24154300 | 5000_MPE | Chicken thigh, sauteed, skin eaten                                                                | 45 | 3.5 | D | 3 |
| 32130080 | 5000_MPE | Egg omelet or scrambled egg, from fast food / restaurant                                          | 44 | 3   | C | 3 |
| 31203000 | 5000_MPE | Quail egg, canned                                                                                 | 44 | 3   | D | 3 |
| 32105310 | 5000_MPE | Ripe plantain omelet, Puerto Rican style                                                          | 44 | 3.5 | C | 4 |
| 24127202 | 5000_MPE | Chicken breast, fried, coated, prepared skinless, coating eaten, from raw                         | 44 | 4   | B | 4 |
| 24152230 | 5000_MPE | Chicken thigh, baked, broiled, or roasted, skin eaten, from raw                                   | 44 | 3.5 | C | 3 |
| 33000990 | 5000_MPE | Egg substitute, omelet, scrambled, or fried, NS as to fat added in cooking                        | 44 | 3.5 | C | 4 |
| 33001035 | 5000_MPE | Egg substitute, omelet, scrambled, or fried, NS as to type of fat                                 | 44 | 3.5 | C | 4 |
| 23150270 | 5000_MPE | Goat head, cooked                                                                                 | 44 | 4   | B | 3 |
| 32110100 | 5000_MPE | Eggs a la Malaguena, Puerto Rican style                                                           | 44 | 4   | B | 4 |
| 32131210 | 5000_MPE | Egg omelet or scrambled egg, with potatoes and/or onions, fat not added in cooking                | 44 | 3.5 | A | 4 |
| 32400500 | 5000_MPE | Egg white, omelet, scrambled, or fried, with cheese and vegetables, fat added in cooking          | 43 | 3.5 | B | 4 |
| 32400520 | 5000_MPE | Egg white, omelet, scrambled, or fried, with cheese and vegetables, NS as to fat added in cooking | 43 | 3.5 | B | 4 |
| 24152250 | 5000_MPE | Chicken thigh, baked or broiled, skin eaten, from fast food / restaurant                          | 43 | 3.5 | D | 3 |
| 21401400 | 5000_MPE | Beef, roast, canned                                                                               | 43 | 4   | B | 3 |
| 24198735 | 5000_MPE | Chicken nuggets, from school lunch                                                                | 43 | 3.5 | B | 4 |
| 24198745 | 5000_MPE | Chicken tenders or strips, breaded, from school lunch                                             | 43 | 3.5 | B | 4 |
| 23322300 | 5000_MPE | Deer chop, cooked                                                                                 | 43 | 4   | C | 3 |
| 23334100 | 5000_MPE | Beaver, cooked                                                                                    | 43 | 4   | B | 3 |
| 24132240 | 5000_MPE | Chicken leg, drumstick and thigh, rotisserie, skin eaten                                          | 43 | 4   | C | 3 |
| 24130210 | 5000_MPE | Chicken leg, drumstick and thigh, NS as to cooking method, skin eaten                             | 43 | 4   | C | 3 |
| 24133210 | 5000_MPE | Chicken leg, drumstick and thigh, stewed, skin eaten                                              | 43 | 3.5 | C | 3 |
| 24205000 | 5000_MPE | Turkey, tail                                                                                      | 43 | 2   | D | 3 |
| 31105020 | 5000_MPE | Egg, whole, fried with margarine                                                                  | 42 | 3   | D | 3 |
| 24164000 | 5000_MPE | Chicken wing, grilled without sauce                                                               | 42 | 3.5 | D | 3 |
| 24164200 | 5000_MPE | Chicken wing, sauteed                                                                             | 42 | 3.5 | D | 3 |
| 33401410 | 5000_MPE | Egg substitute, omelet, scrambled, or fried, with cheese and vegetables, fat not added in cooking | 42 | 3.5 | B | 4 |
| 31105080 | 5000_MPE | Egg, whole, fried with cooking spray                                                              | 42 | 3.5 | C | 3 |
| 33401000 | 5000_MPE | Egg substitute, omelet, scrambled, or fried, with cheese, fat added in cooking                    | 42 | 3   | D | 4 |
| 33401020 | 5000_MPE | Egg substitute, omelet, scrambled, or fried, with cheese, NS as to fat added in cooking           | 42 | 3   | D | 4 |
| 23321250 | 5000_MPE | Venison/deer steak, breaded or floured, cooked, NS as to cooking method                           | 42 | 4   | B | 4 |
| 31105010 | 5000_MPE | Egg, whole, fried without fat                                                                     | 42 | 3.5 | C | 3 |
| 24153210 | 5000_MPE | Chicken thigh, stewed, skin eaten                                                                 | 42 | 3.5 | C | 3 |
| 24152240 | 5000_MPE | Chicken thigh, baked or broiled, skin eaten, from pre-cooked                                      | 41 | 4   | C | 3 |
| 24152300 | 5000_MPE | Chicken thigh, rotisserie, skin eaten                                                             | 41 | 4   | C | 3 |
| 24150210 | 5000_MPE | Chicken thigh, NS as to cooking method, skin eaten                                                | 41 | 4   | C | 3 |
| 31105005 | 5000_MPE | Egg, whole, fried, NS as to fat added in cooking                                                  | 41 | 3   | D | 3 |
| 31105085 | 5000_MPE | Egg, whole, fried, NS as to type of fat                                                           | 41 | 3   | D | 3 |
| 23324100 | 5000_MPE | Caribou, cooked                                                                                   | 41 | 4.5 | B | 3 |
| 24162150 | 5000_MPE | Chicken wing, baked or broiled, from fast food / restaurant                                       | 41 | 2   | D | 3 |
| 32130640 | 5000_MPE | Egg omelet or scrambled egg, with cheese and dark-green vegetables, fat not added in cooking      | 41 | 3.5 | C | 4 |
| 32130040 | 5000_MPE | Egg omelet or scrambled egg, made with animal fat or meat drippings                               | 41 | 3   | C | 3 |
| 24127221 | 5000_MPE | Chicken breast, fried, coated, skin / coating not eaten, from fast food / restaurant              | 40 | 4   | B | 4 |
| 23323100 | 5000_MPE | Moose, cooked                                                                                     | 40 | 4.5 | A | 3 |
| 24162130 | 5000_MPE | Chicken wing, baked, broiled, or roasted, from raw                                                | 40 | 3.5 | D | 3 |
| 32130100 | 5000_MPE | Egg omelet or scrambled egg, with cheese, made with margarine                                     | 40 | 3   | D | 3 |
| 32130670 | 5000_MPE | Egg omelet or scrambled egg, with cheese, tomatoes, and dark-green vegetables, fat not added in   | 40 | 3.5 | B | 4 |
| 32105180 | 5000_MPE | Huevos rancheros                                                                                  | 40 | 4   | B | 4 |
| 24127500 | 5000_MPE | Chicken breast, baked, coated, skin / coating eaten                                               | 40 | 4   | B | 4 |
| 24123311 | 5000_MPE | Chicken breast, grilled with sauce, skin not eaten                                                | 40 | 4   | C | 4 |
| 22701020 | 5000_MPE | Pork, spareribs, cooked, lean only eaten                                                          | 40 | 4   | C | 3 |
| 32130630 | 5000_MPE | Egg omelet or scrambled egg, with cheese and dark-green vegetables, fat added in cooking          | 40 | 3   | C | 4 |
| 32130650 | 5000_MPE | Egg omelet or scrambled egg, with cheese and dark-green vegetables, NS as to fat added in cookin  | 40 | 3   | C | 4 |
| 24201060 | 5000_MPE | Turkey, light meat, breaded, baked or fried, skin not eaten                                       | 39 | 4.5 | A | 4 |
| 32130660 | 5000_MPE | Egg omelet or scrambled egg, with cheese, tomatoes, and dark-green vegetables, fat added in cool  | 39 | 3   | C | 4 |
| 32130680 | 5000_MPE | Egg omelet or scrambled egg, with cheese, tomatoes, and dark-green vegetables, NS as to fat add   | 39 | 3   | C | 4 |

Supplementary Table 8. Original (uncorrected) scores for all food items.

|          |          |                                                                                                     |    |     |   |   |
|----------|----------|-----------------------------------------------------------------------------------------------------|----|-----|---|---|
| 24201070 | 5000_MPE | Turkey, light meat, breaded, baked or fried, skin eaten                                             | 39 | 4   | B | 4 |
| 23310000 | 5000_MPE | Rabbit, NS as to domestic or wild, cooked                                                           | 39 | 4   | B | 3 |
| 23311100 | 5000_MPE | Rabbit, domestic, NS as to cooking method                                                           | 39 | 4   | B | 3 |
| 32130690 | 5000_MPE | Egg omelet or scrambled egg, with cheese and vegetables other than dark green and/or tomatoes,      | 39 | 3   | C | 4 |
| 32130710 | 5000_MPE | Egg omelet or scrambled egg, with cheese and vegetables other than dark green and/or tomatoes,      | 39 | 3   | C | 4 |
| 25221855 | 5000_MPE | Turkey or chicken sausage, reduced sodium                                                           | 39 | 4   | B | 4 |
| 32130600 | 5000_MPE | Egg omelet or scrambled egg, with cheese and tomatoes, fat added in cooking                         | 39 | 3.5 | B | 4 |
| 32130620 | 5000_MPE | Egg omelet or scrambled egg, with cheese and tomatoes, NS as to fat added in cooking                | 39 | 3.5 | B | 4 |
| 24198677 | 5000_MPE | Chicken fillet, breaded                                                                             | 38 | 3.5 | B | 4 |
| 24198746 | 5000_MPE | Chicken tenders or strips, breaded, from frozen                                                     | 38 | 3.5 | B | 4 |
| 24170200 | 5000_MPE | Chicken, back                                                                                       | 38 | 3.5 | D | 3 |
| 33401010 | 5000_MPE | Egg substitute, omelet, scrambled, or fried, with cheese, fat not added in cooking                  | 38 | 3   | C | 3 |
| 24198500 | 5000_MPE | Chicken feet                                                                                        | 38 | 4   | B | 1 |
| 24400010 | 5000_MPE | Cornish game hen, cooked, skin eaten                                                                | 38 | 3.5 | D | 3 |
| 24401010 | 5000_MPE | Cornish game hen, roasted, skin eaten                                                               | 38 | 3.5 | D | 3 |
| 21500000 | 5000_MPE | Ground beef, raw                                                                                    | 38 | 3.5 | C | 3 |
| 31108100 | 5000_MPE | Egg, white, cooked, NS as to fat added in cooking                                                   | 38 | 3.5 | B | 4 |
| 31108120 | 5000_MPE | Egg, white, cooked, fat added in cooking                                                            | 38 | 3.5 | B | 4 |
| 24162140 | 5000_MPE | Chicken wing, baked or broiled, from pre-cooked                                                     | 38 | 2   | D | 3 |
| 24162200 | 5000_MPE | Chicken wing, rotisserie                                                                            | 38 | 2   | D | 3 |
| 24160110 | 5000_MPE | Chicken wing, NS as to cooking method                                                               | 38 | 2   | D | 3 |
| 23150100 | 5000_MPE | Goat, boiled                                                                                        | 37 | 4   | B | 3 |
| 23150250 | 5000_MPE | Goat, baked                                                                                         | 37 | 4   | B | 3 |
| 23150300 | 5000_MPE | Goat ribs, cooked                                                                                   | 37 | 4   | B | 3 |
| 24198747 | 5000_MPE | Chicken tenders or strips, breaded, from other sources                                              | 37 | 3.5 | D | 4 |
| 24198739 | 5000_MPE | Chicken tenders or strips, NFS                                                                      | 37 | 2   | D | 4 |
| 24198741 | 5000_MPE | Chicken tenders or strips, breaded, from fast food                                                  | 37 | 2   | D | 4 |
| 32130020 | 5000_MPE | Egg omelet or scrambled egg, made with butter                                                       | 37 | 3   | D | 3 |
| 24198671 | 5000_MPE | Chicken patty, breaded                                                                              | 37 | 3   | D | 4 |
| 23150200 | 5000_MPE | Goat, fried                                                                                         | 37 | 4   | B | 3 |
| 33001050 | 5000_MPE | Egg substitute, omelet, scrambled, or fried, made without fat                                       | 37 | 3.5 | B | 4 |
| 33001110 | 5000_MPE | Egg substitute, cheese flavored, omelet, scrambled, or fried, fat not added in cooking              | 37 | 3.5 | B | 4 |
| 33001210 | 5000_MPE | Egg substitute, vegetable flavored, omelet, scrambled, or fried, fat not added in cooking           | 37 | 3.5 | B | 4 |
| 24127200 | 5000_MPE | Chicken breast, fried, coated, skin / coating eaten, from raw                                       | 36 | 4   | C | 4 |
| 22000100 | 5000_MPE | Pork, NS as to cut, cooked, NS as to fat eaten                                                      | 36 | 3.5 | C | 3 |
| 22000110 | 5000_MPE | Pork, NS as to cut, cooked, lean and fat eaten                                                      | 36 | 3.5 | C | 3 |
| 22101000 | 5000_MPE | Pork chop, NS as to cooking method, NS as to fat eaten                                              | 36 | 3.5 | C | 3 |
| 22101010 | 5000_MPE | Pork chop, NS as to cooking method, lean and fat eaten                                              | 36 | 3.5 | C | 3 |
| 22101100 | 5000_MPE | Pork chop, broiled or baked, NS as to fat eaten                                                     | 36 | 3.5 | C | 3 |
| 22101110 | 5000_MPE | Pork chop, broiled or baked, lean and fat eaten                                                     | 36 | 3.5 | C | 3 |
| 23331100 | 5000_MPE | Ground hog, cooked                                                                                  | 36 | 4   | C | 3 |
| 23326100 | 5000_MPE | Bison, cooked                                                                                       | 36 | 4.5 | A | 3 |
| 32130830 | 5000_MPE | Egg omelet or scrambled egg, with meat and dark-green vegetables, fat added in cooking              | 36 | 3   | C | 4 |
| 32130850 | 5000_MPE | Egg omelet or scrambled egg, with meat and dark-green vegetables, NS as to fat added in cooking     | 36 | 3   | C | 4 |
| 24103070 | 5000_MPE | Chicken, NS as to part, grilled with sauce, NS as to skin eaten                                     | 36 | 3.5 | C | 4 |
| 24103080 | 5000_MPE | Chicken, NS as to part, grilled with sauce, skin not eaten                                          | 36 | 3.5 | C | 4 |
| 33401500 | 5000_MPE | Egg substitute, omelet, scrambled, or fried, with meat and vegetables, fat added in cooking         | 36 | 3   | C | 4 |
| 33401520 | 5000_MPE | Egg substitute, omelet, scrambled, or fried, with meat and vegetables, NS as to fat added in cookin | 36 | 3   | C | 4 |
| 23321000 | 5000_MPE | Venison/deer, NFS                                                                                   | 36 | 4.5 | B | 3 |
| 23321100 | 5000_MPE | Venison/deer, roasted                                                                               | 36 | 4.5 | B | 3 |
| 23322350 | 5000_MPE | Venison/deer ribs, cooked                                                                           | 36 | 4.5 | B | 3 |
| 23322400 | 5000_MPE | Venison/deer, stewed                                                                                | 36 | 4.5 | B | 3 |
| 22201020 | 5000_MPE | Pork steak or cutlet, NS as to cooking method, lean only eaten                                      | 35 | 4   | C | 3 |
| 22201120 | 5000_MPE | Pork steak or cutlet, broiled or baked, lean only eaten                                             | 35 | 4   | C | 3 |
| 72125240 | 5000_MPE | Spinach souffle                                                                                     | 35 | 3.5 | B | 4 |
| 32130860 | 5000_MPE | Egg omelet or scrambled egg, with meat, tomatoes, and dark-green vegetables, fat added in cooki     | 35 | 3   | C | 4 |
| 32130880 | 5000_MPE | Egg omelet or scrambled egg, with meat, tomatoes, and dark-green vegetables, NS as to fat added     | 35 | 3   | C | 4 |
| 24147302 | 5000_MPE | Chicken drumstick, fried, coated, prepared skinless, coating eaten, from raw                        | 35 | 3.5 | C | 4 |
| 24127210 | 5000_MPE | Chicken breast, fried, coated, skin / coating eaten, from pre-cooked                                | 35 | 4   | C | 4 |
| 33001040 | 5000_MPE | Egg substitute, omelet, scrambled, or fried, made with cooking spray                                | 35 | 3.5 | B | 4 |
| 32400060 | 5000_MPE | Egg white omelet, scrambled, or fried, made with margarine                                          | 35 | 3.5 | B | 4 |
| 32400510 | 5000_MPE | Egg white, omelet, scrambled, or fried, with cheese and vegetables, fat not added in cooking        | 35 | 3.5 | B | 4 |
| 24163110 | 5000_MPE | Chicken wing, stewed                                                                                | 35 | 3.5 | D | 3 |
| 23311200 | 5000_MPE | Rabbit, wild, cooked                                                                                | 35 | 4.5 | B | 3 |
| 24198729 | 5000_MPE | Chicken nuggets, NFS                                                                                | 35 | 3   | D | 4 |
| 24198731 | 5000_MPE | Chicken nuggets, from fast food                                                                     | 35 | 3   | D | 4 |
| 24198732 | 5000_MPE | Chicken nuggets, from restaurant                                                                    | 35 | 3   | D | 4 |
| 32400100 | 5000_MPE | Egg white, omelet, scrambled, or fried, with cheese, fat added in cooking                           | 35 | 3   | C | 4 |
| 32400120 | 5000_MPE | Egg white, omelet, scrambled, or fried, with cheese, NS as to fat added in cooking                  | 35 | 3   | C | 4 |
| 24198742 | 5000_MPE | Chicken tenders or strips, breaded, from restaurant                                                 | 35 | 2   | D | 4 |
| 73305020 | 5000_MPE | Squash, winter, souffle                                                                             | 35 | 4.5 | A | 4 |
| 32130890 | 5000_MPE | Egg omelet or scrambled egg, with meat and vegetables other than dark-green and/or tomatoes, f      | 34 | 3   | D | 4 |
| 32130910 | 5000_MPE | Egg omelet or scrambled egg, with meat and vegetables other than dark-green and/or tomatoes, f      | 34 | 3   | D | 4 |
| 32130110 | 5000_MPE | Egg omelet or scrambled egg, with cheese, made with oil                                             | 34 | 3   | D | 4 |
| 32130140 | 5000_MPE | Egg omelet or scrambled egg, with cheese, made with animal fat or meat drippings                    | 34 | 3   | D | 3 |
| 22301120 | 5000_MPE | Ham, fresh, cooked, lean only eaten                                                                 | 34 | 4   | C | 3 |
| 32103050 | 5000_MPE | Egg Salad, made with any type of fat free dressing                                                  | 34 | 3.5 | B | 4 |
| 22400120 | 5000_MPE | Pork roast, NS as to cut, cooked, lean only eaten                                                   | 34 | 4   | C | 3 |
| 22401020 | 5000_MPE | Pork roast, loin, cooked, lean only eaten                                                           | 34 | 4   | C | 3 |
| 24147321 | 5000_MPE | Chicken drumstick, fried, coated, skin / coating not eaten, from fast food / restaurant             | 34 | 3.5 | C | 4 |
| 24180200 | 5000_MPE | Chicken, neck or ribs                                                                               | 34 | 3.5 | D | 3 |
| 32130800 | 5000_MPE | Egg omelet or scrambled egg, with meat and tomatoes, fat added in cooking                           | 34 | 3   | C | 4 |
| 32130820 | 5000_MPE | Egg omelet or scrambled egg, with meat and tomatoes, NS as to fat added in cooking                  | 34 | 3   | C | 4 |
| 24147400 | 5000_MPE | Chicken drumstick, baked, coated, skin / coating eaten                                              | 33 | 4   | C | 4 |
| 22402510 | 5000_MPE | Fried pork chunks, Puerto Rican style                                                               | 33 | 4   | D | 3 |
| 32130260 | 5000_MPE | Egg omelet or scrambled egg, with meat, made with cooking spray                                     | 33 | 2   | D | 3 |



Supplementary Table 8. Original (uncorrected) scores for all food items.

|          |          |                                                                                                  |    |     |   |   |
|----------|----------|--------------------------------------------------------------------------------------------------|----|-----|---|---|
| 22210300 | 5000_MPE | Pork, tenderloin, cooked, NS as to cooking method                                                | 33 | 4   | C | 3 |
| 22210400 | 5000_MPE | Pork, tenderloin, baked                                                                          | 33 | 4   | C | 3 |
| 22704010 | 5000_MPE | Pork, cracklings, cooked                                                                         | 33 | 0.5 | E | 3 |
| 21000100 | 5000_MPE | Beef, NS as to cut, cooked, NS as to fat eaten                                                   | 33 | 4   | C | 3 |
| 21000120 | 5000_MPE | Beef, NS as to cut, cooked, lean only eaten                                                      | 33 | 4   | C | 3 |
| 21001000 | 5000_MPE | Steak, NS as to type of meat, cooked, NS as to fat eaten                                         | 33 | 4   | C | 3 |
| 21001020 | 5000_MPE | Steak, NS as to type of meat, cooked, lean only eaten                                            | 33 | 4   | C | 3 |
| 21101000 | 5000_MPE | Beef steak, NS as to cooking method, NS as to fat eaten                                          | 33 | 4   | C | 3 |
| 21101020 | 5000_MPE | Beef steak, NS as to cooking method, lean only eaten                                             | 33 | 4   | C | 3 |
| 21101110 | 5000_MPE | Beef steak, broiled or baked, NS as to fat eaten                                                 | 33 | 4   | C | 3 |
| 21101130 | 5000_MPE | Beef steak, broiled or baked, lean only eaten                                                    | 33 | 4   | C | 3 |
| 24208000 | 5000_MPE | Turkey, nuggets                                                                                  | 33 | 4   | C | 4 |
| 20000000 | 5000_MPE | Meat, NFS                                                                                        | 33 | 4   | C | 3 |
| 31105060 | 5000_MPE | Egg, whole, fried with animal fat or meat drippings                                              | 33 | 3   | D | 3 |
| 32130270 | 5000_MPE | Egg omelet or scrambled egg, with meat, made without fat                                         | 33 | 2   | D | 3 |
| 24157302 | 5000_MPE | Chicken thigh, fried, coated, prepared skinless, coating eaten, from raw                         | 33 | 4   | C | 4 |
| 32400075 | 5000_MPE | Egg white omelet, scrambled, or fried, made with cooking spray                                   | 33 | 4   | B | 4 |
| 22210310 | 5000_MPE | Pork, tenderloin, breaded, fried                                                                 | 33 | 3.5 | C | 4 |
| 21401110 | 5000_MPE | Beef, roast, roasted, lean and fat eaten                                                         | 33 | 4   | B | 3 |
| 24142511 | 5000_MPE | Chicken drumstick, grilled with sauce, skin not eaten                                            | 32 | 3.5 | C | 4 |
| 22400100 | 5000_MPE | Pork roast, NS as to cut, cooked, NS as to fat eaten                                             | 32 | 3.5 | D | 3 |
| 22400110 | 5000_MPE | Pork roast, NS as to cut, cooked, lean and fat eaten                                             | 32 | 3.5 | D | 3 |
| 22401000 | 5000_MPE | Pork roast, loin, cooked, NS as to fat eaten                                                     | 32 | 3.5 | D | 3 |
| 22401010 | 5000_MPE | Pork roast, loin, cooked, lean and fat eaten                                                     | 32 | 3.5 | D | 3 |
| 22201000 | 5000_MPE | Pork steak or cutlet, NS as to cooking method, NS as to fat eaten                                | 32 | 3.5 | D | 3 |
| 22201010 | 5000_MPE | Pork steak or cutlet, NS as to cooking method, lean and fat eaten                                | 32 | 3.5 | D | 3 |
| 22201100 | 5000_MPE | Pork steak or cutlet, broiled or baked, NS as to fat eaten                                       | 32 | 3.5 | D | 3 |
| 22201110 | 5000_MPE | Pork steak or cutlet, broiled or baked, lean and fat eaten                                       | 32 | 3.5 | D | 3 |
| 24198737 | 5000_MPE | Chicken nuggets, from other sources                                                              | 32 | 3   | D | 4 |
| 25160000 | 5000_MPE | Tongue, cooked                                                                                   | 32 | 2   | D | 3 |
| 24123310 | 5000_MPE | Chicken breast, grilled with sauce, skin eaten                                                   | 32 | 3.5 | C | 4 |
| 22705010 | 5000_MPE | Pork ears, tail, head, snout, miscellaneous parts, cooked                                        | 32 | 3.5 | C | 3 |
| 32130120 | 5000_MPE | Egg omelet or scrambled egg, with cheese, made with butter                                       | 32 | 2   | D | 3 |
| 23204030 | 5000_MPE | Veal cutlet or steak, NS as to cooking method, lean only eaten                                   | 32 | 4   | B | 3 |
| 23204220 | 5000_MPE | Veal cutlet or steak, broiled, lean only eaten                                                   | 32 | 4   | B | 3 |
| 22708010 | 5000_MPE | Pork, pig's hocks, cooked                                                                        | 32 | 3.5 | C | 3 |
| 22411020 | 5000_MPE | Pork roast, shoulder, cooked, lean only eaten                                                    | 32 | 3.5 | C | 3 |
| 32105330 | 5000_MPE | Scrambled eggs with jerked beef, Puerto Rican style                                              | 32 | 1   | D | 4 |
| 23321200 | 5000_MPE | Venison/deer steak, cooked, NS as to cooking method                                              | 31 | 4   | B | 3 |
| 21601010 | 5000_MPE | Beef, bacon, reduced sodium, cooked                                                              | 31 | 0.5 | E | 3 |
| 22600210 | 5000_MPE | Pork bacon, NS as to fresh, smoked or cured, reduced sodium, cooked                              | 31 | 0.5 | E | 3 |
| 24137310 | 5000_MPE | Chicken leg, drumstick and thigh, baked, coated, skin / coating eaten                            | 31 | 3.5 | C | 4 |
| 24147300 | 5000_MPE | Chicken drumstick, fried, coated, skin / coating eaten, from raw                                 | 31 | 3.5 | C | 4 |
| 21000110 | 5000_MPE | Beef, NS as to cut, cooked, lean and fat eaten                                                   | 31 | 3.5 | D | 3 |
| 21101010 | 5000_MPE | Beef steak, NS as to cooking method, lean and fat eaten                                          | 31 | 3.5 | D | 3 |
| 21101120 | 5000_MPE | Beef steak, broiled or baked, lean and fat eaten                                                 | 31 | 3.5 | D | 3 |
| 22000120 | 5000_MPE | Pork, NS as to cut, cooked, lean only eaten                                                      | 31 | 4   | C | 3 |
| 22101020 | 5000_MPE | Pork chop, NS as to cooking method, lean only eaten                                              | 31 | 4   | C | 3 |
| 22101120 | 5000_MPE | Pork chop, broiled or baked, lean only eaten                                                     | 31 | 4   | C | 3 |
| 32400055 | 5000_MPE | Egg white omelet, scrambled, or fried, NS as to fat added in cooking                             | 31 | 3.5 | B | 4 |
| 32400078 | 5000_MPE | Egg white omelet, scrambled, or fried, NS as to type of fat                                      | 31 | 3.5 | B | 4 |
| 24302010 | 5000_MPE | Duck, pressed, Chinese                                                                           | 31 | 3.5 | C | 4 |
| 24134151 | 5000_MPE | Chicken leg, drumstick and thigh, grilled with sauce, skin not eaten                             | 31 | 3.5 | C | 4 |
| 22706010 | 5000_MPE | Pork, neck bones, cooked                                                                         | 31 | 3.5 | D | 3 |
| 24157321 | 5000_MPE | Chicken thigh, fried, coated, skin / coating not eaten, from fast food                           | 31 | 3.5 | C | 4 |
| 24157331 | 5000_MPE | Chicken thigh, fried, coated, skin / coating not eaten, from restaurant                          | 31 | 3.5 | C | 4 |
| 22602010 | 5000_MPE | Pork bacon, smoked or cured, reduced sodium, cooked                                              | 31 | 0.5 | E | 3 |
| 24107080 | 5000_MPE | Chicken, NS as to part, baked, coated, skin / coating eaten                                      | 31 | 2   | D | 4 |
| 21401000 | 5000_MPE | Beef, roast, roasted, NS as to fat eaten                                                         | 31 | 4   | B | 3 |
| 25170110 | 5000_MPE | Tripe, cooked                                                                                    | 30 | 3.5 | B | 3 |
| 22301000 | 5000_MPE | Ham, fresh, cooked, NS as to fat eaten                                                           | 30 | 2   | D | 3 |
| 22301110 | 5000_MPE | Ham, fresh, cooked, lean and fat eaten                                                           | 30 | 2   | D | 3 |
| 23200120 | 5000_MPE | Veal, NS as to cut, cooked, lean only eaten                                                      | 30 | 4   | B | 3 |
| 22101500 | 5000_MPE | Pork chop, stewed, NS as to fat eaten                                                            | 30 | 3.5 | C | 3 |
| 22101510 | 5000_MPE | Pork chop, stewed, lean and fat eaten                                                            | 30 | 3.5 | C | 3 |
| 24168012 | 5000_MPE | Chicken "wings", plain, from precooked                                                           | 30 | 3   | D | 4 |
| 23101020 | 5000_MPE | Lamb chop, NS as to cut, cooked, lean only eaten                                                 | 30 | 4   | C | 3 |
| 23104020 | 5000_MPE | Lamb, loin chop, cooked, lean only eaten                                                         | 30 | 4   | C | 3 |
| 31108110 | 5000_MPE | Egg, white, cooked, fat not added in cooking                                                     | 30 | 4   | B | 1 |
| 25231120 | 5000_MPE | Beef, prepackaged or deli, luncheon meat, reduced sodium                                         | 30 | 3.5 | C | 3 |
| 24157400 | 5000_MPE | Chicken thigh, baked, coated, skin / coating eaten                                               | 30 | 3.5 | C | 4 |
| 32400600 | 5000_MPE | Egg white, omelet, scrambled, or fried, with meat and vegetables, fat added in cooking           | 30 | 3   | C | 4 |
| 32400620 | 5000_MPE | Egg white, omelet, scrambled, or fried, with meat and vegetables, NS as to fat added in cooking  | 30 | 3   | C | 4 |
| 21001010 | 5000_MPE | Steak, NS as to type of meat, cooked, lean and fat eaten                                         | 30 | 3.5 | D | 3 |
| 23340100 | 5000_MPE | Armadillo, cooked                                                                                | 30 | 4.5 | A | 3 |
| 24154021 | 5000_MPE | Chicken thigh, grilled with sauce, skin not eaten                                                | 30 | 3.5 | D | 4 |
| 32130840 | 5000_MPE | Egg omelet or scrambled egg, with meat and dark-green vegetables, fat not added in cooking       | 30 | 3.5 | C | 4 |
| 24147310 | 5000_MPE | Chicken drumstick, fried, coated, skin / coating eaten, from pre-cooked                          | 30 | 3.5 | D | 4 |
| 22000200 | 5000_MPE | Pork, NS as to cut, fried, NS as to fat eaten                                                    | 30 | 3.5 | C | 3 |
| 22000210 | 5000_MPE | Pork, NS as to cut, fried, lean and fat eaten                                                    | 30 | 3.5 | C | 3 |
| 22101200 | 5000_MPE | Pork chop, fried, NS as to fat eaten                                                             | 30 | 3.5 | C | 3 |
| 22101210 | 5000_MPE | Pork chop, fried, lean and fat eaten                                                             | 30 | 3.5 | C | 3 |
| 24208500 | 5000_MPE | Turkey bacon, cooked                                                                             | 30 | 0.5 | E | 3 |
| 23110000 | 5000_MPE | Lamb, ribs, cooked, lean only eaten                                                              | 29 | 3.5 | C | 3 |
| 32130870 | 5000_MPE | Egg omelet or scrambled egg, with meat, tomatoes, and dark-green vegetables, fat not added in cc | 29 | 3.5 | C | 4 |
| 24137300 | 5000_MPE | Chicken leg, drumstick and thigh, fried, coated, skin / coating eaten                            | 29 | 3.5 | C | 4 |

Supplementary Table 8. Original (uncorrected) scores for all food items.

|          |          |                                                                                                     |    |     |   |   |
|----------|----------|-----------------------------------------------------------------------------------------------------|----|-----|---|---|
| 32131090 | 5000_MPE | Egg omelet or scrambled egg, with cheese, meat, and vegetables other than dark-green and/or tor     | 29 | 3   | D | 4 |
| 32131110 | 5000_MPE | Egg omelet or scrambled egg, with cheese, meat, and vegetables other than dark-green and/or tor     | 29 | 3   | D | 4 |
| 22201220 | 5000_MPE | Pork steak or cutlet, fried, lean only eaten                                                        | 29 | 4   | C | 3 |
| 31105040 | 5000_MPE | Egg, whole, fried with butter                                                                       | 29 | 2   | D | 3 |
| 32130360 | 5000_MPE | Egg omelet or scrambled egg, with cheese and meat, made with cooking spray                          | 29 | 2   | D | 3 |
| 21401120 | 5000_MPE | Beef, roast, roasted, lean only eaten                                                               | 28 | 4   | B | 3 |
| 25221406 | 5000_MPE | Pork sausage, reduced fat                                                                           | 28 | 1.5 | D | 3 |
| 32130370 | 5000_MPE | Egg omelet or scrambled egg, with cheese and meat, made without fat                                 | 28 | 2   | D | 3 |
| 32130810 | 5000_MPE | Egg omelet or scrambled egg, with meat and tomatoes, fat not added in cooking                       | 28 | 3.5 | C | 4 |
| 21410110 | 5000_MPE | Beef, stew meat, cooked, lean and fat eaten                                                         | 28 | 4   | C | 3 |
| 24103075 | 5000_MPE | Chicken, NS as to part, grilled with sauce, skin eaten                                              | 28 | 3.5 | C | 4 |
| 22701000 | 5000_MPE | Pork, spareribs, cooked, NS as to fat eaten                                                         | 28 | 1.5 | D | 3 |
| 22701010 | 5000_MPE | Pork, spareribs, cooked, lean and fat eaten                                                         | 28 | 1.5 | D | 3 |
| 23120120 | 5000_MPE | Lamb, roast, cooked, lean only eaten                                                                | 28 | 4   | C | 3 |
| 22300140 | 5000_MPE | Ham, fried, lean only eaten                                                                         | 28 | 1.5 | D | 3 |
| 25221220 | 5000_MPE | Pastrami, made from any kind of meat, reduced fat                                                   | 28 | 3.5 | D | 3 |
| 25231110 | 5000_MPE | Beef, prepackaged or deli, luncheon meat                                                            | 28 | 3.5 | D | 3 |
| 33401600 | 5000_MPE | Egg substitute, omelet, scrambled, or fried, with cheese, meat, and vegetables, fat added in cookin | 28 | 3   | D | 4 |
| 33401620 | 5000_MPE | Egg substitute, omelet, scrambled, or fried, with cheese, meat, and vegetables, NS as to fat added  | 28 | 3   | D | 4 |
| 21417100 | 5000_MPE | Beef brisket, cooked, NS as to fat eaten                                                            | 28 | 4   | C | 3 |
| 21417120 | 5000_MPE | Beef brisket, cooked, lean only eaten                                                               | 28 | 4   | C | 3 |
| 32131000 | 5000_MPE | Egg omelet or scrambled egg, with cheese, meat, and tomatoes, fat added in cooking                  | 28 | 3   | C | 4 |
| 32131020 | 5000_MPE | Egg omelet or scrambled egg, with cheese, meat, and tomatoes, NS as to fat added in cooking         | 28 | 3   | C | 4 |
| 22501010 | 5000_MPE | Canadian bacon, cooked                                                                              | 28 | 2   | D | 3 |
| 22002000 | 5000_MPE | Pork, ground or patty, cooked                                                                       | 28 | 2   | D | 3 |
| 33001020 | 5000_MPE | Egg substitute, omelet, scrambled, or fried, made with butter                                       | 28 | 3   | C | 3 |
| 23204010 | 5000_MPE | Veal cutlet or steak, NS as to cooking method, NS as to fat eaten                                   | 28 | 4   | C | 3 |
| 25220106 | 5000_MPE | Beef sausage, reduced fat                                                                           | 28 | 1.5 | D | 3 |
| 24167300 | 5000_MPE | Chicken wing, baked, coated                                                                         | 28 | 3.5 | D | 4 |
| 22411000 | 5000_MPE | Pork roast, shoulder, cooked, NS as to fat eaten                                                    | 28 | 2   | D | 3 |
| 22411010 | 5000_MPE | Pork roast, shoulder, cooked, lean and fat eaten                                                    | 28 | 2   | D | 3 |
| 24127220 | 5000_MPE | Chicken breast, fried, coated, skin / coating eaten, from fast food / restaurant                    | 28 | 3   | D | 4 |
| 24157300 | 5000_MPE | Chicken thigh, fried, coated, skin / coating eaten, from raw                                        | 28 | 3.5 | C | 4 |
| 22201070 | 5000_MPE | Pork steak or cutlet, battered, fried, lean only eaten                                              | 28 | 3.5 | C | 3 |
| 24168022 | 5000_MPE | Chicken "wings", plain, from other sources                                                          | 27 | 2   | D | 4 |
| 22300120 | 5000_MPE | Ham, fried, NS as to fat eaten                                                                      | 27 | 1.5 | D | 3 |
| 22300130 | 5000_MPE | Ham, fried, lean and fat eaten                                                                      | 27 | 1.5 | D | 3 |
| 23311120 | 5000_MPE | Rabbit, NS as to domestic or wild, breaded, fried                                                   | 27 | 4   | C | 3 |
| 32400110 | 5000_MPE | Egg white, omelet, scrambled, or fried, with cheese, fat not added in cooking                       | 27 | 3.5 | C | 3 |
| 27250550 | 5000_MPE | Seafood souffle                                                                                     | 27 | 3   | C | 4 |
| 24157310 | 5000_MPE | Chicken thigh, fried, coated, skin / coating eaten, from pre-cooked                                 | 27 | 3   | D | 4 |
| 24142510 | 5000_MPE | Chicken drumstick, grilled with sauce, skin eaten                                                   | 27 | 3.5 | D | 4 |
| 32130210 | 5000_MPE | Egg omelet or scrambled egg, with meat, made with oil                                               | 27 | 3   | D | 4 |
| 21105110 | 5000_MPE | Beef steak, braised, NS as to fat eaten                                                             | 27 | 3.5 | D | 3 |
| 21105120 | 5000_MPE | Beef steak, braised, lean and fat eaten                                                             | 27 | 3.5 | D | 3 |
| 21301000 | 5000_MPE | Beef, oxtails, cooked                                                                               | 27 | 3.5 | D | 3 |
| 21407000 | 5000_MPE | Beef, pot roast, braised or boiled, NS as to fat eaten                                              | 27 | 3.5 | D | 3 |
| 21407120 | 5000_MPE | Beef, pot roast, braised or boiled, lean only eaten                                                 | 27 | 3.5 | D | 3 |
| 21410000 | 5000_MPE | Beef, stew meat, cooked, NS as to fat eaten                                                         | 27 | 3.5 | D | 3 |
| 21410120 | 5000_MPE | Beef, stew meat, cooked, lean only eaten                                                            | 27 | 3.5 | D | 3 |
| 23132000 | 5000_MPE | Lamb, ground or patty, cooked                                                                       | 27 | 2   | D | 3 |
| 23107020 | 5000_MPE | Lamb, shoulder chop, cooked, lean only eaten                                                        | 27 | 3.5 | C | 3 |
| 32131060 | 5000_MPE | Egg omelet or scrambled egg, with cheese, meat, tomatoes, and dark-green vegetables, fat added      | 27 | 3   | D | 4 |
| 32131080 | 5000_MPE | Egg omelet or scrambled egg, with cheese, meat, tomatoes, and dark-green vegetables, NS as to f     | 27 | 3   | D | 4 |
| 23204020 | 5000_MPE | Veal cutlet or steak, NS as to cooking method, lean and fat eaten                                   | 27 | 4   | C | 3 |
| 21304000 | 5000_MPE | Beef, shortribs, cooked, NS as to fat eaten                                                         | 27 | 2   | D | 3 |
| 21304120 | 5000_MPE | Beef, shortribs, cooked, lean only eaten                                                            | 27 | 2   | D | 3 |
| 24301210 | 5000_MPE | Duck, coated, fried                                                                                 | 27 | 4   | C | 4 |
| 32101000 | 5000_MPE | Egg, creamed                                                                                        | 27 | 3   | C | 4 |
| 22600100 | 5000_MPE | Bacon, NS as to type of meat, cooked                                                                | 27 | 0.5 | E | 3 |
| 22600200 | 5000_MPE | Pork bacon, NS as to fresh, smoked or cured, cooked                                                 | 27 | 0.5 | E | 3 |
| 22601000 | 5000_MPE | Pork bacon, smoked or cured, cooked                                                                 | 27 | 0.5 | E | 3 |
| 22601040 | 5000_MPE | Bacon or side pork, fresh, cooked                                                                   | 27 | 0.5 | E | 3 |
| 21305000 | 5000_MPE | Beef, cow head, cooked                                                                              | 26 | 2   | D | 3 |
| 33401110 | 5000_MPE | Egg substitute, omelet, scrambled, or fried, with meat, fat not added in cooking                    | 26 | 3   | D | 3 |
| 22300170 | 5000_MPE | Ham, breaded or floured, fried, lean only eaten                                                     | 26 | 1.5 | D | 3 |
| 32130900 | 5000_MPE | Egg omelet or scrambled egg, with meat and vegetables other than dark-green and/or tomatoes, f      | 26 | 3   | C | 4 |
| 33401510 | 5000_MPE | Egg substitute, omelet, scrambled, or fried, with meat and vegetables, fat not added in cooking     | 26 | 3.5 | C | 4 |
| 24134150 | 5000_MPE | Chicken leg, drumstick and thigh, grilled with sauce, skin eaten                                    | 26 | 3   | D | 4 |
| 32131030 | 5000_MPE | Egg omelet or scrambled egg, with cheese, meat, and dark-green vegetables, fat added in cooking     | 26 | 2   | D | 4 |
| 32131050 | 5000_MPE | Egg omelet or scrambled egg, with cheese, meat, and dark-green vegetables, NS as to fat added in    | 26 | 2   | D | 4 |
| 21003000 | 5000_MPE | Beef, NS as to cut, fried, NS to fat eaten                                                          | 26 | 4   | C | 3 |
| 21102110 | 5000_MPE | Beef steak, fried, NS as to fat eaten                                                               | 26 | 4   | C | 3 |
| 21102130 | 5000_MPE | Beef steak, fried, lean only eaten                                                                  | 26 | 4   | C | 3 |
| 23200100 | 5000_MPE | Veal, NS as to cut, cooked, NS as to fat eaten                                                      | 26 | 4   | C | 3 |
| 23200110 | 5000_MPE | Veal, NS as to cut, cooked, lean and fat eaten                                                      | 26 | 4   | C | 3 |
| 23210010 | 5000_MPE | Veal, roasted, NS as to fat eaten                                                                   | 26 | 4   | C | 3 |
| 23210020 | 5000_MPE | Veal, roasted, lean and fat eaten                                                                   | 26 | 4   | C | 3 |
| 22002100 | 5000_MPE | Pork, ground or patty, breaded, cooked                                                              | 26 | 2   | D | 4 |
| 24168002 | 5000_MPE | Chicken "wings", plain, from fast food / restaurant                                                 | 26 | 1.5 | D | 4 |
| 21500310 | 5000_MPE | Ground beef patty, cooked                                                                           | 26 | 2   | D | 3 |
| 20000200 | 5000_MPE | Ground meat, NFS                                                                                    | 26 | 2   | D | 3 |
| 21500100 | 5000_MPE | Ground beef, cooked                                                                                 | 26 | 2   | D | 3 |
| 21302000 | 5000_MPE | Beef, neck bones, cooked                                                                            | 26 | 2   | D | 3 |
| 23101000 | 5000_MPE | Lamb chop, NS as to cut, cooked, NS as to fat eaten                                                 | 26 | 1.5 | D | 3 |
| 23101010 | 5000_MPE | Lamb chop, NS as to cut, cooked, lean and fat eaten                                                 | 26 | 1.5 | D | 3 |

Supplementary Table 8. Original (uncorrected) scores for all food items.

|          |          |                                                                                                          |    |     |   |   |
|----------|----------|----------------------------------------------------------------------------------------------------------|----|-----|---|---|
| 23104000 | 5000_MPE | Lamb, loin chop, cooked, NS as to fat eaten                                                              | 26 | 1.5 | D | 3 |
| 23104010 | 5000_MPE | Lamb, loin chop, cooked, lean and fat eaten                                                              | 26 | 1.5 | D | 3 |
| 24198736 | 5000_MPE | Chicken nuggets, from frozen                                                                             | 26 | 3   | C | 4 |
| 23000100 | 5000_MPE | Lamb, NS as to cut, cooked                                                                               | 26 | 2   | D | 3 |
| 22201200 | 5000_MPE | Pork steak or cutlet, fried, NS as to fat eaten                                                          | 26 | 3.5 | D | 3 |
| 22201210 | 5000_MPE | Pork steak or cutlet, fried, lean and fat eaten                                                          | 26 | 3.5 | D | 3 |
| 24300110 | 5000_MPE | Duck, cooked, skin eaten                                                                                 | 25 | 2   | D | 4 |
| 24301010 | 5000_MPE | Duck, roasted, skin eaten                                                                                | 25 | 2   | D | 4 |
| 23120100 | 5000_MPE | Lamb, roast, cooked, NS as to fat eaten                                                                  | 25 | 2   | D | 3 |
| 23120110 | 5000_MPE | Lamb, roast, cooked, lean and fat eaten                                                                  | 25 | 2   | D | 3 |
| 23111010 | 5000_MPE | Lamb hocks, cooked                                                                                       | 25 | 3.5 | D | 3 |
| 21417110 | 5000_MPE | Beef brisket, cooked, lean and fat eaten                                                                 | 25 | 2   | D | 3 |
| 24154020 | 5000_MPE | Chicken thigh, grilled with sauce, skin eaten                                                            | 25 | 3   | D | 4 |
| 22000300 | 5000_MPE | Pork, NS as to cut, breaded or floured, fried, NS as to fat eaten                                        | 25 | 3.5 | C | 4 |
| 22000320 | 5000_MPE | Pork, NS as to cut, breaded or floured, fried, lean only eaten                                           | 25 | 3.5 | C | 4 |
| 22101320 | 5000_MPE | Pork chop, breaded or floured, fried, lean only eaten                                                    | 25 | 3.5 | C | 4 |
| 23205030 | 5000_MPE | Veal cutlet or steak, fried, lean only eaten                                                             | 25 | 4   | B | 3 |
| 22101520 | 5000_MPE | Pork chop, stewed, lean only eaten                                                                       | 25 | 4   | C | 3 |
| 22300150 | 5000_MPE | Ham, breaded or floured, fried, NS as to fat eaten                                                       | 25 | 2   | D | 3 |
| 22300160 | 5000_MPE | Ham, breaded or floured, fried, lean and fat eaten                                                       | 25 | 2   | D | 3 |
| 22311520 | 5000_MPE | Ham, smoked or cured, canned, lean only eaten                                                            | 25 | 2   | D | 3 |
| 33401100 | 5000_MPE | Egg substitute, omelet, scrambled, or fried, with meat, fat added in cooking                             | 25 | 2   | D | 4 |
| 33401120 | 5000_MPE | Egg substitute, omelet, scrambled, or fried, with meat, NS as to fat added in cooking                    | 25 | 2   | D | 4 |
| 23107000 | 5000_MPE | Lamb, shoulder chop, cooked, NS as to fat eaten                                                          | 25 | 2   | D | 3 |
| 23107010 | 5000_MPE | Lamb, shoulder chop, cooked, lean and fat eaten                                                          | 25 | 2   | D | 3 |
| 24147320 | 5000_MPE | Chicken drumstick, fried, coated, skin / coating eaten, from fast food / restaurant                      | 25 | 2   | D | 4 |
| 22201050 | 5000_MPE | Pork steak or cutlet, battered, fried, NS as to fat eaten                                                | 25 | 3   | D | 3 |
| 22201060 | 5000_MPE | Pork steak or cutlet, battered, fried, lean and fat eaten                                                | 25 | 3   | D | 3 |
| 32130320 | 5000_MPE | Egg omelet or scrambled egg, with cheese and meat, made with butter                                      | 24 | 1.5 | D | 3 |
| 23110010 | 5000_MPE | Lamb, ribs, cooked, NS as to fat eaten                                                                   | 24 | 1.5 | D | 3 |
| 23110050 | 5000_MPE | Lamb, ribs, cooked, lean and fat eaten                                                                   | 24 | 1.5 | D | 3 |
| 21102120 | 5000_MPE | Beef steak, fried, lean and fat eaten                                                                    | 24 | 3.5 | D | 3 |
| 21420100 | 5000_MPE | Beef, sandwich steak, flaked, formed, thinly sliced                                                      | 24 | 2   | D | 4 |
| 22000220 | 5000_MPE | Pork, NS as to cut, fried, lean only eaten                                                               | 24 | 4   | C | 3 |
| 22101220 | 5000_MPE | Pork chop, fried, lean only eaten                                                                        | 24 | 4   | C | 3 |
| 22101130 | 5000_MPE | Pork chop, breaded or floured, broiled or baked, NS as to fat eaten                                      | 24 | 3.5 | D | 4 |
| 22101140 | 5000_MPE | Pork chop, breaded or floured, broiled or baked, lean and fat eaten                                      | 24 | 3.5 | D | 4 |
| 24167200 | 5000_MPE | Chicken wing, fried, coated, from raw                                                                    | 24 | 3.5 | D | 4 |
| 24107070 | 5000_MPE | Chicken, NS as to part, fried, coated, skin / coating eaten                                              | 24 | 2   | D | 4 |
| 25160110 | 5000_MPE | Tongue, smoked, cured, or pickled, cooked                                                                | 24 | 1   | E | 3 |
| 22201420 | 5000_MPE | Pork steak or cutlet, breaded or floured, fried, lean only eaten                                         | 24 | 3.5 | C | 4 |
| 25230560 | 5000_MPE | Liverwurst                                                                                               | 24 | 1   | E | 4 |
| 23220020 | 5000_MPE | Mock chicken legs, cooked                                                                                | 24 | 3.5 | D | 3 |
| 22107020 | 5000_MPE | Pork chop, smoked or cured, cooked, lean only eaten                                                      | 24 | 1.5 | D | 3 |
| 25240110 | 5000_MPE | Chicken salad spread                                                                                     | 24 | 3   | D | 4 |
| 32400080 | 5000_MPE | Egg white omelet, scrambled, or fried, made without fat                                                  | 23 | 4   | B | 1 |
| 24164010 | 5000_MPE | Chicken wing, grilled with sauce                                                                         | 23 | 2   | D | 4 |
| 24167210 | 5000_MPE | Chicken wing, fried, coated, from pre-cooked                                                             | 23 | 3   | D | 4 |
| 22000310 | 5000_MPE | Pork, NS as to cut, breaded or floured, fried, lean and fat eaten                                        | 23 | 3.5 | D | 4 |
| 22101300 | 5000_MPE | Pork chop, breaded or floured, fried, NS as to fat eaten                                                 | 23 | 3.5 | D | 4 |
| 22101310 | 5000_MPE | Pork chop, breaded or floured, fried, lean and fat eaten                                                 | 23 | 3.5 | D | 4 |
| 24168031 | 5000_MPE | Chicken "wings", boneless, with hot sauce, from other sources                                            | 23 | 2   | D | 4 |
| 32130200 | 5000_MPE | Egg omelet or scrambled egg, with meat, made with margarine                                              | 23 | 2   | D | 4 |
| 32400700 | 5000_MPE | Egg white, omelet, scrambled, or fried, with cheese, meat, and vegetables, fat added in cooking          | 23 | 3   | D | 4 |
| 32400720 | 5000_MPE | Egg white, omelet, scrambled, or fried, with cheese, meat, and vegetables, NS as to fat added in cooking | 23 | 3   | D | 4 |
| 23220010 | 5000_MPE | Veal, ground or patty, cooked                                                                            | 23 | 4   | C | 3 |
| 24168030 | 5000_MPE | Chicken "wings", boneless, with hot sauce, from fast food / restaurant                                   | 23 | 1.5 | D | 4 |
| 23201030 | 5000_MPE | Veal chop, NS as to cooking method, lean only eaten                                                      | 23 | 4   | C | 3 |
| 23203120 | 5000_MPE | Veal chop, broiled, lean only eaten                                                                      | 23 | 4   | C | 3 |
| 23210030 | 5000_MPE | Veal, roasted, lean only eaten                                                                           | 23 | 4   | C | 3 |
| 32130190 | 5000_MPE | Egg omelet or scrambled egg, with meat, NS as to fat added in cooking                                    | 23 | 2   | D | 4 |
| 32130265 | 5000_MPE | Egg omelet or scrambled egg, with meat, NS as to type of fat                                             | 23 | 2   | D | 4 |
| 22421000 | 5000_MPE | Pork roast, smoked or cured, cooked, NS as to fat eaten                                                  | 23 | 1.5 | D | 3 |
| 22421010 | 5000_MPE | Pork roast, smoked or cured, cooked, lean and fat eaten                                                  | 23 | 1.5 | D | 3 |
| 32131010 | 5000_MPE | Egg omelet or scrambled egg, with cheese, meat, and tomatoes, fat not added in cooking                   | 23 | 3   | C | 4 |
| 22311500 | 5000_MPE | Ham, smoked or cured, canned, NS as to fat eaten                                                         | 23 | 2   | D | 3 |
| 22311510 | 5000_MPE | Ham, smoked or cured, canned, lean and fat eaten                                                         | 23 | 2   | D | 3 |
| 22101150 | 5000_MPE | Pork chop, breaded or floured, broiled or baked, lean only eaten                                         | 23 | 3.5 | C | 4 |
| 25170310 | 5000_MPE | Hog maws, cooked                                                                                         | 23 | 2   | D | 3 |
| 32130310 | 5000_MPE | Egg omelet or scrambled egg, with cheese and meat, made with oil                                         | 23 | 1.5 | D | 4 |
| 22201320 | 5000_MPE | Pork steak or cutlet, breaded or floured, broiled or baked, lean only eaten                              | 22 | 3.5 | C | 4 |
| 23204200 | 5000_MPE | Veal cutlet or steak, broiled, NS as to fat eaten                                                        | 22 | 4   | B | 3 |
| 23204210 | 5000_MPE | Veal cutlet or steak, broiled, lean and fat eaten                                                        | 22 | 4   | B | 3 |
| 33401310 | 5000_MPE | Egg substitute, omelet, scrambled, or fried, with cheese and meat, fat not added in cooking              | 22 | 2   | D | 3 |
| 21304110 | 5000_MPE | Beef, shortribs, cooked, lean and fat eaten                                                              | 22 | 1   | E | 3 |
| 21105130 | 5000_MPE | Beef steak, braised, lean only eaten                                                                     | 22 | 4   | C | 3 |
| 22311000 | 5000_MPE | Ham, smoked or cured, cooked, NS as to fat eaten                                                         | 22 | 1.5 | D | 3 |
| 22311010 | 5000_MPE | Ham, smoked or cured, cooked, lean and fat eaten                                                         | 22 | 1.5 | D | 3 |
| 21407110 | 5000_MPE | Beef, pot roast, braised or boiled, lean and fat eaten                                                   | 22 | 4   | B | 3 |
| 22311020 | 5000_MPE | Ham, smoked or cured, cooked, lean only eaten                                                            | 22 | 1.5 | D | 3 |
| 23201010 | 5000_MPE | Veal chop, NS as to cooking method, NS as to fat eaten                                                   | 22 | 3.5 | D | 3 |
| 23201020 | 5000_MPE | Veal chop, NS as to cooking method, lean and fat eaten                                                   | 22 | 3.5 | D | 3 |
| 23203100 | 5000_MPE | Veal chop, broiled, NS as to fat eaten                                                                   | 22 | 3.5 | D | 3 |
| 23203110 | 5000_MPE | Veal chop, broiled, lean and fat eaten                                                                   | 22 | 3.5 | D | 3 |
| 32400210 | 5000_MPE | Egg white, omelet, scrambled, or fried, with meat, fat not added in cooking                              | 22 | 2   | D | 3 |
| 24168011 | 5000_MPE | Chicken "wings" with other sauces or seasoning, from precooked                                           | 22 | 2   | D | 4 |

Supplementary Table 8. Original (uncorrected) scores for all food items.

|          |          |                                                                                                     |    |     |   |   |
|----------|----------|-----------------------------------------------------------------------------------------------------|----|-----|---|---|
| 32131070 | 5000_MPE | Egg omelet or scrambled egg, with cheese, meat, tomatoes, and dark-green vegetables, fat not ad     | 22 | 3   | D | 4 |
| 22311450 | 5000_MPE | Ham, prosciutto                                                                                     | 22 | 0.5 | D | 3 |
| 24198340 | 5000_MPE | Chicken, tail                                                                                       | 21 | 3.5 | C | 4 |
| 24168001 | 5000_MPE | Chicken "wings" with other sauces or seasoning, from fast food / restaurant                         | 21 | 1.5 | D | 4 |
| 22421020 | 5000_MPE | Pork roast, smoked or cured, cooked, lean only eaten                                                | 21 | 1.5 | D | 3 |
| 32131100 | 5000_MPE | Egg omelet or scrambled egg, with cheese, meat, and vegetables other than dark-green and/or tor     | 21 | 3   | D | 4 |
| 21103130 | 5000_MPE | Beef steak, breaded or floured, baked or fried, lean only eaten                                     | 21 | 3.5 | C | 4 |
| 21103110 | 5000_MPE | Beef steak, breaded or floured, baked or fried, NS as to fat eaten                                  | 21 | 3.5 | C | 4 |
| 32131040 | 5000_MPE | Egg omelet or scrambled egg, with cheese, meat, and dark-green vegetables, fat not added in cook    | 21 | 2   | D | 4 |
| 22210350 | 5000_MPE | Pork, tenderloin, braised                                                                           | 21 | 4   | B | 4 |
| 22210450 | 5000_MPE | Pork, tenderloin, battered, fried                                                                   | 21 | 4   | C | 4 |
| 22201300 | 5000_MPE | Pork steak or cutlet, breaded or floured, broiled or baked, NS as to fat eaten                      | 21 | 2   | D | 4 |
| 22201310 | 5000_MPE | Pork steak or cutlet, breaded or floured, broiled or baked, lean and fat eaten                      | 21 | 2   | D | 4 |
| 24168021 | 5000_MPE | Chicken "wings" with other sauces or seasoning, from other sources                                  | 21 | 1.5 | D | 4 |
| 33401610 | 5000_MPE | Egg substitute, omelet, scrambled, or fried, with cheese, meat, and vegetables, fat not added in co | 21 | 3   | D | 4 |
| 22107000 | 5000_MPE | Pork chop, smoked or cured, cooked, NS as to fat eaten                                              | 20 | 1   | E | 3 |
| 22107010 | 5000_MPE | Pork chop, smoked or cured, cooked, lean and fat eaten                                              | 20 | 1   | E | 3 |
| 25221515 | 5000_MPE | Salami, made from any type of meat, reduced sodium                                                  | 20 | 0.5 | E | 3 |
| 24201510 | 5000_MPE | Turkey, light or dark meat, smoked, skin eaten                                                      | 20 | 2   | D | 3 |
| 14630200 | 5000_MPE | Cheese souffle                                                                                      | 20 | 2   | D | 4 |
| 23220030 | 5000_MPE | Veal patty, breaded, cooked                                                                         | 20 | 3.5 | D | 4 |
| 25230220 | 5000_MPE | Ham, prepackaged or deli, luncheon meat, reduced sodium                                             | 20 | 3.5 | C | 4 |
| 24202120 | 5000_MPE | Turkey, drumstick, smoked, skin eaten                                                               | 20 | 1.5 | D | 3 |
| 24203120 | 5000_MPE | Turkey, wing, smoked, skin eaten                                                                    | 20 | 1.5 | D | 3 |
| 32400200 | 5000_MPE | Egg white, omelet, scrambled, or fried, with meat, fat added in cooking                             | 20 | 2   | D | 4 |
| 32400220 | 5000_MPE | Egg white, omelet, scrambled, or fried, with meat, NS as to fat added in cooking                    | 20 | 2   | D | 4 |
| 22709110 | 5000_MPE | Pork skin, boiled                                                                                   | 20 | 0.5 | E | 3 |
| 23345100 | 5000_MPE | Wild pig, smoked                                                                                    | 20 | 3.5 | C | 3 |
| 33401300 | 5000_MPE | Egg substitute, omelet, scrambled, or fried, with cheese and meat, fat added in cooking             | 20 | 2   | D | 4 |
| 33401320 | 5000_MPE | Egg substitute, omelet, scrambled, or fried, with cheese and meat, NS as to fat added in cooking    | 20 | 2   | D | 4 |
| 22201410 | 5000_MPE | Pork steak or cutlet, breaded or floured, fried, lean and fat eaten                                 | 20 | 2   | D | 4 |
| 32130300 | 5000_MPE | Egg omelet or scrambled egg, with cheese and meat, made with margarine                              | 20 | 2   | D | 4 |
| 22709010 | 5000_MPE | Pork skin rinds                                                                                     | 19 | 0.5 | E | 3 |
| 32130290 | 5000_MPE | Egg omelet or scrambled egg, with cheese and meat, NS as to fat added in cooking                    | 19 | 2   | D | 4 |
| 32130365 | 5000_MPE | Egg omelet or scrambled egg, with cheese and meat, NS as to type of fat                             | 19 | 2   | D | 4 |
| 24157320 | 5000_MPE | Chicken thigh, fried, coated, skin / coating eaten, from fast food                                  | 19 | 2   | D | 4 |
| 24157330 | 5000_MPE | Chicken thigh, fried, coated, skin / coating eaten, from restaurant                                 | 19 | 2   | D | 4 |
| 24167220 | 5000_MPE | Chicken wing, fried, coated, from fast food                                                         | 19 | 1.5 | D | 4 |
| 24167230 | 5000_MPE | Chicken wing, fried, coated, from restaurant                                                        | 19 | 1.5 | D | 4 |
| 75418060 | 5000_MPE | Squash, summer, souffle                                                                             | 19 | 3   | C | 4 |
| 32130240 | 5000_MPE | Egg omelet or scrambled egg, with meat, made with animal fat or meat drippings                      | 19 | 2   | D | 4 |
| 25230110 | 5000_MPE | Luncheon meat, NFS                                                                                  | 19 | 3   | D | 4 |
| 25230210 | 5000_MPE | Ham, prepackaged or deli, luncheon meat                                                             | 19 | 3   | D | 4 |
| 32400410 | 5000_MPE | Egg white, omelet, scrambled, or fried, with cheese and meat, fat not added in cooking              | 18 | 2   | D | 3 |
| 21103120 | 5000_MPE | Beef steak, breaded or floured, baked or fried, lean and fat eaten                                  | 18 | 3.5 | D | 4 |
| 23321050 | 5000_MPE | Venison/deer, cured                                                                                 | 18 | 1.5 | D | 3 |
| 25221255 | 5000_MPE | Pepperoni, reduced fat                                                                              | 18 | 0.5 | E | 3 |
| 25221500 | 5000_MPE | Salami, NFS                                                                                         | 18 | 0.5 | E | 3 |
| 24168010 | 5000_MPE | Chicken "wings" with hot sauce, from precooked                                                      | 17 | 1.5 | D | 4 |
| 21601000 | 5000_MPE | Beef, bacon, cooked                                                                                 | 17 | 0.5 | E | 3 |
| 24201520 | 5000_MPE | Turkey, light or dark meat, smoked, skin not eaten                                                  | 17 | 2   | D | 3 |
| 24198440 | 5000_MPE | Chicken skin                                                                                        | 17 | 1.5 | E | 4 |
| 24168020 | 5000_MPE | Chicken "wings" with hot sauce, from other sources                                                  | 17 | 1.5 | D | 4 |
| 24168000 | 5000_MPE | Chicken "wings" with hot sauce, from fast food / restaurant                                         | 16 | 1.5 | D | 4 |
| 22701050 | 5000_MPE | Pork, spareribs, barbecued, with sauce, lean only eaten                                             | 16 | 3.5 | D | 4 |
| 22201400 | 5000_MPE | Pork steak or cutlet, breaded or floured, fried, NS as to fat eaten                                 | 16 | 2   | D | 4 |
| 32400710 | 5000_MPE | Egg white, omelet, scrambled, or fried, with cheese, meat, and vegetables, fat not added in cookin  | 16 | 3.5 | C | 4 |
| 27246400 | 5000_MPE | Chicken or turkey souffle                                                                           | 16 | 3   | D | 4 |
| 32130220 | 5000_MPE | Egg omelet or scrambled egg, with meat, made with butter                                            | 15 | 2   | D | 4 |
| 22101420 | 5000_MPE | Pork chop, battered, fried, lean only eaten                                                         | 15 | 3.5 | C | 4 |
| 32400400 | 5000_MPE | Egg white, omelet, scrambled, or fried, with cheese and meat, fat added in cooking                  | 15 | 2   | D | 4 |
| 32400420 | 5000_MPE | Egg white, omelet, scrambled, or fried, with cheese and meat, NS as to fat added in cooking         | 15 | 2   | D | 4 |
| 25221350 | 5000_MPE | Italian sausage                                                                                     | 15 | 1   | E | 4 |
| 32130340 | 5000_MPE | Egg omelet or scrambled egg, with cheese and meat, made with animal fat or meat drippings           | 15 | 1.5 | D | 4 |
| 25230785 | 5000_MPE | Turkey, prepackaged or deli, luncheon meat, reduced sodium                                          | 15 | 3.5 | C | 4 |
| 22101400 | 5000_MPE | Pork chop, battered, fried, NS as to fat eaten                                                      | 15 | 3.5 | D | 4 |
| 22101410 | 5000_MPE | Pork chop, battered, fried, lean and fat eaten                                                      | 15 | 3.5 | D | 4 |
| 23203030 | 5000_MPE | Veal chop, fried, lean only eaten                                                                   | 15 | 4   | C | 4 |
| 21002000 | 5000_MPE | Beef, pickled                                                                                       | 15 | 1.5 | E | 3 |
| 21416000 | 5000_MPE | Corned beef, cooked, NS as to fat eaten                                                             | 15 | 1.5 | E | 3 |
| 21416110 | 5000_MPE | Corned beef, cooked, lean and fat eaten                                                             | 15 | 1.5 | E | 3 |
| 32400610 | 5000_MPE | Egg white, omelet, scrambled, or fried, with meat and vegetables, fat not added in cooking          | 14 | 3.5 | C | 4 |
| 32105190 | 5000_MPE | Egg casserole with bread, cheese, milk and meat                                                     | 13 | 3   | D | 4 |
| 25230780 | 5000_MPE | Turkey, prepackaged or deli, luncheon meat                                                          | 13 | 3.5 | C | 4 |
| 25221870 | 5000_MPE | Turkey or chicken and pork sausage                                                                  | 13 | 1.5 | E | 4 |
| 25160130 | 5000_MPE | Tongue pot roast, Puerto Rican style                                                                | 13 | 1   | E | 4 |
| 25170210 | 5000_MPE | Chitterlings, cooked                                                                                | 13 | 2   | D | 3 |
| 25220350 | 5000_MPE | Bratwurst                                                                                           | 13 | 1   | E | 4 |
| 23203010 | 5000_MPE | Veal chop, fried, NS as to fat eaten                                                                | 13 | 3.5 | C | 4 |
| 23203020 | 5000_MPE | Veal chop, fried, lean and fat eaten                                                                | 13 | 3.5 | C | 4 |
| 23205010 | 5000_MPE | Veal cutlet or steak, fried, NS as to fat eaten                                                     | 13 | 3.5 | C | 4 |
| 23205020 | 5000_MPE | Veal cutlet or steak, fried, lean and fat eaten                                                     | 13 | 3.5 | C | 4 |
| 22701030 | 5000_MPE | Pork, spareribs, barbecued, with sauce, NS as to fat eaten                                          | 13 | 1.5 | D | 4 |
| 22701040 | 5000_MPE | Pork, spareribs, barbecued, with sauce, lean and fat eaten                                          | 13 | 1.5 | D | 4 |
| 21304220 | 5000_MPE | Beef, shortribs, barbecued, with sauce, lean only eaten                                             | 12 | 2   | D | 4 |
| 21104110 | 5000_MPE | Beef steak, battered, fried, NS as to fat eaten                                                     | 12 | 4   | C | 4 |

Supplementary Table 8. Original (uncorrected) scores for all food items.

|          |          |                                                                                                |    |     |   |   |
|----------|----------|------------------------------------------------------------------------------------------------|----|-----|---|---|
| 24198840 | 5000_MPE | Fried chicken chunks, Puerto Rican style                                                       | 12 | 2   | D | 4 |
| 25240220 | 5000_MPE | Ham salad spread                                                                               | 12 | 1.5 | D | 4 |
| 25220710 | 5000_MPE | Chorizo                                                                                        | 11 | 0.5 | E | 4 |
| 25221505 | 5000_MPE | Salami, made from any type of meat, reduced fat                                                | 11 | 1.5 | D | 4 |
| 25220360 | 5000_MPE | Bratwurst, with cheese                                                                         | 11 | 1   | E | 4 |
| 21602100 | 5000_MPE | Beef jerky                                                                                     | 11 | 0.5 | E | 4 |
| 22002800 | 5000_MPE | Pork jerky                                                                                     | 11 | 0.5 | E | 4 |
| 21602010 | 5000_MPE | Beef, dried, chipped, cooked in fat                                                            | 11 | 0.5 | D | 3 |
| 32101500 | 5000_MPE | Egg, Benedict                                                                                  | 11 | 1.5 | D | 4 |
| 21104130 | 5000_MPE | Beef steak, battered, fried, lean only eaten                                                   | 10 | 3.5 | C | 4 |
| 22321110 | 5000_MPE | Ham, smoked or cured, ground patty                                                             | 10 | 1   | E | 4 |
| 25221400 | 5000_MPE | Sausage, NFS                                                                                   | 10 | 1   | E | 4 |
| 25221405 | 5000_MPE | Pork sausage                                                                                   | 10 | 1   | E | 4 |
| 25230550 | 5000_MPE | Ham, pork, and chicken, canned luncheon meat, chopped, minced, pressed, spiced, reduced sodium | 10 | 1   | E | 4 |
| 21416120 | 5000_MPE | Corned beef, cooked, lean only eaten                                                           | 10 | 1.5 | D | 3 |
| 21416150 | 5000_MPE | Corned beef, canned, ready-to-eat                                                              | 10 | 1.5 | D | 3 |
| 21304200 | 5000_MPE | Beef, shortribs, barbecued, with sauce, NS as to fat eaten                                     | 10 | 1   | E | 4 |
| 21304210 | 5000_MPE | Beef, shortribs, barbecued, with sauce, lean and fat eaten                                     | 10 | 1   | E | 4 |
| 22621000 | 5000_MPE | Salt pork, cooked                                                                              | 9  | 0.5 | E | 3 |
| 21104120 | 5000_MPE | Beef steak, battered, fried, lean and fat eaten                                                | 9  | 3.5 | D | 4 |
| 25230800 | 5000_MPE | Turkey ham, prepackaged or deli, luncheon meat                                                 | 8  | 2   | D | 4 |
| 25230610 | 5000_MPE | Luncheon meat, loaf type                                                                       | 8  | 1.5 | D | 4 |
| 25230540 | 5000_MPE | Ham, pork and chicken, canned luncheon meat, chopped, minced, pressed, spiced, reduced fat and | 8  | 1.5 | D | 4 |
| 22600110 | 5000_MPE | Bacon, NS as to type of meat, reduced sodium, cooked                                           | 8  | 1.5 | D | 4 |
| 24208510 | 5000_MPE | Turkey bacon, reduced sodium, cooked                                                           | 8  | 1.5 | D | 4 |
| 25221450 | 5000_MPE | Pork sausage rice links                                                                        | 8  | 1   | E | 4 |
| 25221830 | 5000_MPE | Turkey or chicken sausage                                                                      | 8  | 3   | D | 4 |
| 25221860 | 5000_MPE | Turkey or chicken sausage, reduced fat                                                         | 8  | 3   | D | 4 |
| 22707010 | 5000_MPE | Pork, pig's feet, cooked                                                                       | 7  | 3.5 | C | 3 |
| 25221610 | 5000_MPE | Scraple, cooked                                                                                | 7  | 3   | D | 4 |
| 25230420 | 5000_MPE | Ham luncheon meat, loaf type                                                                   | 7  | 1.5 | D | 4 |
| 25210410 | 5000_MPE | Frankfurter or hot dog, turkey                                                                 | 6  | 1.5 | D | 4 |
| 25210250 | 5000_MPE | Frankfurter or hot dog, meat and poultry, fat free                                             | 6  | 3   | C | 4 |
| 25230340 | 5000_MPE | Chicken, prepackaged or deli, luncheon meat, reduced sodium                                    | 6  | 3.5 | C | 4 |
| 25221215 | 5000_MPE | Pastrami, NFS                                                                                  | 5  | 2   | D | 3 |
| 25221260 | 5000_MPE | Pepperoni, reduced sodium                                                                      | 5  | 0.5 | E | 4 |
| 25210290 | 5000_MPE | Frankfurter or hot dog, meat and poultry, reduced fat or light                                 | 5  | 3   | D | 4 |
| 25210620 | 5000_MPE | Frankfurter or hot dog, beef, reduced fat or light                                             | 5  | 3   | D | 4 |
| 25210750 | 5000_MPE | Frankfurter or hot dog, reduced fat or light, NFS                                              | 5  | 3   | D | 4 |
| 25230320 | 5000_MPE | Chicken, prepackaged or deli, luncheon meat                                                    | 4  | 3   | D | 4 |
| 32400070 | 5000_MPE | Egg white omelet, scrambled, or fried, made with butter                                        | 4  | 3   | C | 4 |
| 25240000 | 5000_MPE | Meat spread or potted meat, NFS                                                                | 4  | 1.5 | D | 4 |
| 25221310 | 5000_MPE | Polish sausage                                                                                 | 4  | 1   | E | 4 |
| 25210150 | 5000_MPE | Frankfurter or hot dog, cheese-filled                                                          | 4  | 0.5 | E | 4 |
| 25210220 | 5000_MPE | Frankfurter or hot dog, beef and pork                                                          | 3  | 1.5 | E | 4 |
| 25210240 | 5000_MPE | Frankfurter or hot dog, beef and pork, reduced fat or light                                    | 3  | 1.5 | E | 4 |
| 25210280 | 5000_MPE | Frankfurter or hot dog, meat and poultry                                                       | 3  | 1.5 | E | 4 |
| 25221810 | 5000_MPE | Thuringer                                                                                      | 3  | 0.5 | E | 4 |
| 25210310 | 5000_MPE | Frankfurter or hot dog, chicken                                                                | 3  | 1.5 | D | 4 |
| 21602000 | 5000_MPE | Beef, dried, chipped, uncooked                                                                 | 2  | 0.5 | D | 3 |
| 25221250 | 5000_MPE | Pepperoni, NFS                                                                                 | 2  | 0.5 | E | 4 |
| 25220650 | 5000_MPE | Turkey or chicken and beef sausage                                                             | 2  | 1.5 | D | 4 |
| 25221110 | 5000_MPE | Knockwurst                                                                                     | 2  | 1   | E | 4 |
| 25220435 | 5000_MPE | Bologna, made from any kind of meat, reduced sodium                                            | 1  | 1   | E | 4 |
| 25220108 | 5000_MPE | Beef sausage, reduced sodium                                                                   | 1  | 2   | D | 4 |
| 25221408 | 5000_MPE | Pork sausage, reduced sodium                                                                   | 1  | 2   | D | 4 |
| 25221875 | 5000_MPE | Turkey or chicken, pork, and beef sausage, reduced sodium                                      | 1  | 2   | D | 4 |
| 22001000 | 5000_MPE | Pork, pickled, NS as to cut                                                                    | 1  | 2   | D | 3 |
| 22431000 | 5000_MPE | Pork roll, cured, fried                                                                        | 1  | 0.5 | E | 4 |
| 22707020 | 5000_MPE | Pork, pig's feet, pickled                                                                      | 1  | 2   | D | 3 |
| 23321900 | 5000_MPE | Venison/deer jerky                                                                             | 1  | 0.5 | E | 4 |
| 23322100 | 5000_MPE | Deer sausage                                                                                   | 1  | 1   | E | 4 |
| 25210110 | 5000_MPE | Frankfurter, wiener, or hot dog, NFS                                                           | 1  | 1   | E | 4 |
| 25210210 | 5000_MPE | Frankfurter or hot dog, beef                                                                   | 1  | 1   | E | 4 |
| 25220105 | 5000_MPE | Beef sausage                                                                                   | 1  | 0.5 | E | 4 |
| 25220150 | 5000_MPE | Beef sausage with cheese                                                                       | 1  | 0.5 | E | 4 |
| 25220210 | 5000_MPE | Blood sausage                                                                                  | 1  | 1   | E | 4 |
| 25220410 | 5000_MPE | Bologna, NFS                                                                                   | 1  | 0.5 | E | 4 |
| 25220425 | 5000_MPE | Bologna, made from any kind of meat, reduced fat                                               | 1  | 1.5 | D | 4 |
| 25220445 | 5000_MPE | Bologna, made from any kind of meat, reduced fat and reduced sodium                            | 1  | 1.5 | D | 4 |
| 25220910 | 5000_MPE | Head cheese                                                                                    | 1  | 2   | D | 4 |
| 25221210 | 5000_MPE | Mortadella                                                                                     | 1  | 0.5 | E | 4 |
| 25221460 | 5000_MPE | Pork and beef sausage                                                                          | 1  | 0.5 | E | 4 |
| 25221910 | 5000_MPE | Vienna sausage, canned                                                                         | 1  | 1.5 | D | 4 |
| 25221950 | 5000_MPE | Pickled sausage                                                                                | 1  | 0.5 | E | 4 |
| 25230530 | 5000_MPE | Ham and pork, canned luncheon meat, chopped, minced, pressed, spiced                           | 1  | 0.5 | E | 4 |

Supplementary Table 8. Original (uncorrected) scores for all food items.

| foodcode | level1nd     | Description                                                    | Food Compass Score | Health Star Rating | Nutri-Score | NOVA Category |
|----------|--------------|----------------------------------------------------------------|--------------------|--------------------|-------------|---------------|
| 26100100 | 5800_Seafood | Fish, NS as to type, raw                                       | 100                | 4.5                | A           | 1             |
| 26118000 | 5800_Seafood | Halibut, raw                                                   | 100                | 4.5                | A           | 1             |
| 26118010 | 5800_Seafood | Halibut, cooked, NS as to cooking method                       | 100                | 4                  | B           | 3             |
| 26118020 | 5800_Seafood | Halibut, baked or broiled, made with oil                       | 100                | 4                  | B           | 3             |
| 26133100 | 5800_Seafood | Porgy, raw                                                     | 100                | 4.5                | A           | 1             |
| 26137100 | 5800_Seafood | Salmon, raw                                                    | 100                | 4.5                | A           | 1             |
| 26153100 | 5800_Seafood | Tuna, fresh, raw                                               | 100                | 4.5                | A           | 1             |
| 26153170 | 5800_Seafood | Tuna, fresh, dried                                             | 100                | 4.5                | B           | 3             |
| 26321110 | 5800_Seafood | Snails, cooked, NS as to cooking method                        | 100                | 4                  | B           | 3             |
| 26315100 | 5800_Seafood | Oysters, raw                                                   | 100                | 4                  | A           | 1             |
| 26117110 | 5800_Seafood | Haddock, cooked, NS as to cooking method                       | 99                 | 4                  | B           | 3             |
| 26117120 | 5800_Seafood | Haddock, baked or broiled, fat added in cooking                | 99                 | 4                  | B           | 3             |
| 26153110 | 5800_Seafood | Tuna, fresh, cooked, NS as to cooking method                   | 98                 | 4                  | B           | 3             |
| 26153120 | 5800_Seafood | Tuna, fresh, baked or broiled, fat added in cooking            | 98                 | 4                  | B           | 3             |
| 26137170 | 5800_Seafood | Salmon, dried                                                  | 98                 | 4.5                | C           | 3             |
| 26309160 | 5800_Seafood | Crayfish, boiled or steamed                                    | 98                 | 4                  | A           | 3             |
| 26315180 | 5800_Seafood | Oysters, canned                                                | 98                 | 4                  | A           | 3             |
| 27150230 | 5800_Seafood | Shrimp scampi                                                  | 97                 | 4                  | A           | 3             |
| 26139180 | 5800_Seafood | Sardines, canned in oil                                        | 97                 | 4                  | B           | 3             |
| 26118024 | 5800_Seafood | Halibut, baked or broiled, made with cooking spray             | 97                 | 4                  | B           | 3             |
| 26139110 | 5800_Seafood | Sardines, cooked                                               | 96                 | 4                  | B           | 3             |
| 26115000 | 5800_Seafood | Flounder, raw                                                  | 96                 | 4.5                | A           | 1             |
| 26209100 | 5800_Seafood | Roe, herring                                                   | 95                 | 4.5                | A           | 3             |
| 26118022 | 5800_Seafood | Halibut, baked or broiled, made with margarine                 | 95                 | 4                  | B           | 3             |
| 26305120 | 5800_Seafood | Crab, baked or broiled, fat added in cooking                   | 95                 | 3.5                | C           | 3             |
| 26137120 | 5800_Seafood | Salmon, baked or broiled, made with oil                        | 95                 | 4                  | B           | 3             |
| 26137110 | 5800_Seafood | Salmon, cooked, NS as to cooking method                        | 95                 | 4                  | B           | 3             |
| 26129120 | 5800_Seafood | Pike, baked or broiled, fat added in cooking                   | 94                 | 4                  | B           | 3             |
| 26125100 | 5800_Seafood | Ocean perch, raw                                               | 94                 | 4.5                | A           | 1             |
| 26215120 | 5800_Seafood | Turtle, cooked, NS as to cooking method                        | 94                 | 4                  | B           | 3             |
| 26213100 | 5800_Seafood | Squid, raw                                                     | 94                 | 4.5                | A           | 1             |
| 26109120 | 5800_Seafood | Cod, baked or broiled, made with oil                           | 93                 | 4                  | B           | 3             |
| 26109110 | 5800_Seafood | Cod, cooked, NS as to cooking method                           | 93                 | 4                  | B           | 3             |
| 26121100 | 5800_Seafood | Mackerel, raw                                                  | 93                 | 4                  | A           | 3             |
| 26118023 | 5800_Seafood | Halibut, baked or broiled, made without fat                    | 93                 | 4                  | B           | 3             |
| 26100120 | 5800_Seafood | Fish, NS as to type, baked or broiled, made with oil           | 92                 | 4                  | B           | 3             |
| 26100110 | 5800_Seafood | Fish, NS as to type, cooked, NS as to cooking method           | 92                 | 4                  | B           | 3             |
| 26118050 | 5800_Seafood | Halibut, steamed or poached                                    | 92                 | 4                  | B           | 3             |
| 26147110 | 5800_Seafood | Sturgeon, cooked, NS as to cooking method                      | 92                 | 4                  | B           | 3             |
| 26147120 | 5800_Seafood | Sturgeon, baked or broiled, fat added in cooking               | 92                 | 4                  | B           | 3             |
| 26319120 | 5800_Seafood | Shrimp, baked or broiled, made with oil                        | 92                 | 4                  | B           | 3             |
| 26311120 | 5800_Seafood | Lobster, baked or broiled, fat added in cooking                | 92                 | 3.5                | C           | 3             |
| 26127120 | 5800_Seafood | Perch, baked or broiled, made with oil                         | 91                 | 4                  | B           | 3             |
| 26109180 | 5800_Seafood | Cod, dried, salted, salt removed in water                      | 91                 | 4.5                | A           | 3             |
| 26119100 | 5800_Seafood | Herring, raw                                                   | 90                 | 4                  | A           | 3             |
| 26207110 | 5800_Seafood | Roe, shad, cooked                                              | 90                 | 4                  | C           | 3             |
| 26127124 | 5800_Seafood | Perch, baked or broiled, made with cooking spray               | 90                 | 4                  | B           | 3             |
| 26115120 | 5800_Seafood | Flounder, baked or broiled, made with oil                      | 89                 | 4                  | B           | 3             |
| 26123100 | 5800_Seafood | Mullet, raw                                                    | 89                 | 4.5                | A           | 1             |
| 26137124 | 5800_Seafood | Salmon, baked or broiled, made with cooking spray              | 89                 | 4                  | B           | 3             |
| 26139170 | 5800_Seafood | Sardines, dried                                                | 89                 | 4                  | D           | 3             |
| 26137180 | 5800_Seafood | Salmon, canned                                                 | 89                 | 4                  | B           | 3             |
| 26137122 | 5800_Seafood | Salmon, baked or broiled, made with margarine                  | 89                 | 4                  | B           | 3             |
| 26141110 | 5800_Seafood | Sea bass, cooked, NS as to cooking method                      | 89                 | 4                  | B           | 3             |
| 26141120 | 5800_Seafood | Sea bass, baked or broiled, fat added in cooking               | 89                 | 4                  | B           | 3             |
| 26157120 | 5800_Seafood | Whiting, baked or broiled, made with oil                       | 89                 | 4                  | B           | 3             |
| 26149110 | 5800_Seafood | Swordfish, cooked, NS as to cooking method                     | 88                 | 4                  | C           | 3             |
| 26149120 | 5800_Seafood | Swordfish, baked or broiled, fat added in cooking              | 88                 | 4                  | C           | 3             |
| 26125110 | 5800_Seafood | Ocean perch, cooked, NS as to cooking method                   | 88                 | 4                  | B           | 3             |
| 26125120 | 5800_Seafood | Ocean perch, baked or broiled, fat added in cooking            | 88                 | 4                  | B           | 3             |
| 26158000 | 5800_Seafood | Tilapia, cooked, NS as to cooking method                       | 88                 | 4                  | B           | 3             |
| 26158010 | 5800_Seafood | Tilapia, baked or broiled, made with oil                       | 88                 | 4                  | B           | 3             |
| 26100122 | 5800_Seafood | Fish, NS as to type, baked or broiled, made with margarine     | 88                 | 4                  | B           | 3             |
| 26100124 | 5800_Seafood | Fish, NS as to type, baked or broiled, made with cooking spray | 88                 | 4                  | B           | 3             |
| 26205170 | 5800_Seafood | Octopus, dried                                                 | 88                 | 1.5                | D           | 3             |
| 26100180 | 5800_Seafood | Fish, NS as to type, canned                                    | 88                 | 4                  | A           | 3             |
| 26155110 | 5800_Seafood | Tuna, canned, NS as to oil or water pack                       | 88                 | 4                  | A           | 3             |
| 26155190 | 5800_Seafood | Tuna, canned, water pack                                       | 88                 | 4                  | A           | 3             |
| 26133120 | 5800_Seafood | Porgy, baked or broiled, fat added in cooking                  | 88                 | 4                  | B           | 3             |
| 26137123 | 5800_Seafood | Salmon, baked or broiled, made without fat                     | 88                 | 4                  | B           | 3             |
| 26319122 | 5800_Seafood | Shrimp, baked or broiled, made with margarine                  | 88                 | 4                  | B           | 3             |
| 26133110 | 5800_Seafood | Porgy, cooked, NS as to cooking method                         | 87                 | 4                  | B           | 3             |
| 26109122 | 5800_Seafood | Cod, baked or broiled, made with margarine                     | 87                 | 4                  | B           | 3             |
| 26319124 | 5800_Seafood | Shrimp, baked or broiled, made with cooking spray              | 87                 | 4                  | B           | 3             |
| 26315120 | 5800_Seafood | Oysters, baked or broiled, fat added in cooking                | 87                 | 3.5                | B           | 3             |
| 26205190 | 5800_Seafood | Octopus, smoked                                                | 87                 | 4                  | B           | 3             |
| 26213120 | 5800_Seafood | Squid, baked or broiled, fat added in cooking                  | 87                 | 4                  | A           | 3             |
| 26151110 | 5800_Seafood | Trout, cooked, NS as to cooking method                         | 87                 | 4                  | C           | 3             |
| 26151120 | 5800_Seafood | Trout, baked or broiled, made with oil                         | 87                 | 4                  | C           | 3             |
| 26100160 | 5800_Seafood | Fish, NS as to type, steamed                                   | 87                 | 4                  | B           | 3             |
| 26137160 | 5800_Seafood | Salmon, steamed or poached                                     | 87                 | 4                  | B           | 3             |
| 26313100 | 5800_Seafood | Mussels, raw                                                   | 87                 | 4                  | A           | 3             |
| 26105120 | 5800_Seafood | Carp, baked or broiled, fat added in cooking                   | 87                 | 4                  | B           | 3             |
| 26147130 | 5800_Seafood | Sturgeon, steamed                                              | 87                 | 4                  | B           | 3             |
| 26100190 | 5800_Seafood | Fish, NS as to type, smoked                                    | 86                 | 3.5                | C           | 3             |

Supplementary Table 8. Original (uncorrected) scores for all food items.

|          |              |                                                         |    |     |   |   |
|----------|--------------|---------------------------------------------------------|----|-----|---|---|
| 26137190 | 5800_Seafood | Salmon, smoked                                          | 86 | 3.5 | C | 3 |
| 26100123 | 5800_Seafood | Fish, NS as to type, baked or broiled, made without fat | 86 | 4   | B | 3 |
| 26127122 | 5800_Seafood | Perch, baked or broiled, made with margarine            | 86 | 4   | B | 3 |
| 26115122 | 5800_Seafood | Flounder, baked or broiled, made with margarine         | 85 | 4   | B | 3 |
| 26111120 | 5800_Seafood | Croaker, baked or broiled, fat added in cooking         | 85 | 4   | B | 3 |
| 26111110 | 5800_Seafood | Croaker, cooked, NS as to cooking method                | 85 | 4   | B | 3 |
| 26153122 | 5800_Seafood | Tuna, fresh, baked or broiled, fat not added in cooking | 85 | 4.5 | B | 3 |
| 26155180 | 5800_Seafood | Tuna, canned, oil pack                                  | 85 | 4   | B | 3 |
| 26118060 | 5800_Seafood | Halibut, smoked                                         | 85 | 4   | C | 3 |
| 26121120 | 5800_Seafood | Mackerel, baked or broiled, fat added in cooking        | 85 | 3.5 | D | 3 |
| 26121110 | 5800_Seafood | Mackerel, cooked, NS as to cooking method               | 85 | 3.5 | D | 3 |
| 26115124 | 5800_Seafood | Flounder, baked or broiled, made with cooking spray     | 84 | 4   | B | 3 |
| 26149121 | 5800_Seafood | Swordfish, baked or broiled, fat not added in cooking   | 84 | 4   | C | 3 |
| 26131100 | 5800_Seafood | Pompano, raw                                            | 84 | 4   | B | 1 |
| 26151122 | 5800_Seafood | Trout, baked or broiled, made with margarine            | 84 | 4   | C | 3 |
| 26105121 | 5800_Seafood | Carp, baked or broiled, fat not added in cooking        | 84 | 4   | B | 3 |
| 26157124 | 5800_Seafood | Whiting, baked or broiled, made with cooking spray      | 84 | 4   | B | 3 |
| 26151124 | 5800_Seafood | Trout, baked or broiled, made with cooking spray        | 84 | 4   | B | 3 |
| 26117121 | 5800_Seafood | Haddock, baked or broiled, fat not added in cooking     | 84 | 4   | B | 3 |
| 26153160 | 5800_Seafood | Tuna, fresh, steamed or poached                         | 83 | 4.5 | B | 3 |
| 26103110 | 5800_Seafood | Barracuda, cooked, NS as to cooking method              | 83 | 4   | C | 3 |
| 26103120 | 5800_Seafood | Barracuda, baked or broiled, fat added in cooking       | 83 | 4   | C | 3 |
| 26158012 | 5800_Seafood | Tilapia, baked or broiled, made with margarine          | 83 | 4   | B | 3 |
| 26151123 | 5800_Seafood | Trout, baked or broiled, made without fat               | 83 | 4   | B | 3 |
| 26305180 | 5800_Seafood | Crab, canned                                            | 83 | 4   | B | 3 |
| 26157122 | 5800_Seafood | Whiting, baked or broiled, made with margarine          | 83 | 4   | B | 3 |
| 26105160 | 5800_Seafood | Carp, steamed or poached                                | 83 | 4   | B | 3 |
| 26203160 | 5800_Seafood | Frog legs, steamed                                      | 83 | 4   | B | 3 |
| 26149160 | 5800_Seafood | Swordfish, steamed or poached                           | 82 | 4   | C | 3 |
| 26319123 | 5800_Seafood | Shrimp, baked or broiled, made without fat              | 82 | 4   | B | 3 |
| 26319130 | 5800_Seafood | Shrimp, steamed or boiled                               | 82 | 4   | A | 3 |
| 26121121 | 5800_Seafood | Mackerel, baked or broiled, fat not added in cooking    | 82 | 4   | C | 3 |
| 26315190 | 5800_Seafood | Oysters, smoked                                         | 82 | 3.5 | B | 3 |
| 26133121 | 5800_Seafood | Porgy, baked or broiled, fat not added in cooking       | 82 | 4   | B | 3 |
| 26317110 | 5800_Seafood | Scallops, cooked, NS as to cooking method               | 82 | 4   | B | 3 |
| 26317120 | 5800_Seafood | Scallops, baked or broiled, fat added in cooking        | 82 | 4   | B | 3 |
| 26315121 | 5800_Seafood | Oysters, baked or broiled, fat not added in cooking     | 82 | 3.5 | B | 3 |
| 26117160 | 5800_Seafood | Haddock, steamed or poached                             | 82 | 4   | B | 3 |
| 26141121 | 5800_Seafood | Sea bass, baked or broiled, fat not added in cooking    | 81 | 4   | B | 3 |
| 26158014 | 5800_Seafood | Tilapia, baked or broiled, made with cooking spray      | 81 | 4   | B | 3 |
| 26305110 | 5800_Seafood | Crab, cooked, NS as to cooking method                   | 81 | 3.5 | C | 3 |
| 26305160 | 5800_Seafood | Crab, hard shell, steamed                               | 81 | 3.5 | C | 3 |
| 26115123 | 5800_Seafood | Flounder, baked or broiled, made without fat            | 81 | 4   | B | 3 |
| 26123120 | 5800_Seafood | Mullet, baked or broiled, fat added in cooking          | 81 | 4   | B | 3 |
| 26119120 | 5800_Seafood | Herring, baked or broiled, fat added in cooking         | 81 | 4   | C | 3 |
| 26119110 | 5800_Seafood | Herring, cooked, NS as to cooking method                | 81 | 4   | C | 3 |
| 26113190 | 5800_Seafood | Eel, smoked                                             | 80 | 3.5 | D | 3 |
| 26115190 | 5800_Seafood | Flounder, smoked                                        | 80 | 4.5 | B | 3 |
| 26151160 | 5800_Seafood | Trout, steamed or poached                               | 80 | 4   | B | 3 |
| 26157123 | 5800_Seafood | Whiting, baked or broiled, made without fat             | 80 | 4   | B | 3 |
| 26319180 | 5800_Seafood | Shrimp, canned                                          | 80 | 3.5 | C | 3 |
| 26141160 | 5800_Seafood | Sea bass, steamed or poached                            | 80 | 4   | B | 3 |
| 26213190 | 5800_Seafood | Squid, canned                                           | 80 | 4   | A | 3 |
| 26113160 | 5800_Seafood | Eel, steamed or poached                                 | 80 | 4   | C | 3 |
| 26121190 | 5800_Seafood | Mackerel, smoked                                        | 80 | 4   | C | 3 |
| 26153190 | 5800_Seafood | Tuna, fresh, smoked                                     | 80 | 4   | C | 3 |
| 26143110 | 5800_Seafood | Shark, cooked, NS as to cooking method                  | 80 | 4   | B | 3 |
| 26143120 | 5800_Seafood | Shark, baked or broiled, fat added in cooking           | 80 | 4   | B | 3 |
| 26135110 | 5800_Seafood | Ray, cooked, NS as to cooking method                    | 80 | 4   | B | 3 |
| 26135120 | 5800_Seafood | Ray, baked or broiled, fat added in cooking             | 80 | 4   | B | 3 |
| 26139190 | 5800_Seafood | Sardines, skinless, boneless, packed in water           | 80 | 4   | C | 3 |
| 26151190 | 5800_Seafood | Trout, smoked                                           | 80 | 4   | D | 3 |
| 26205180 | 5800_Seafood | Octopus, dried, boiled                                  | 80 | 4   | C | 3 |
| 26115160 | 5800_Seafood | Flounder, steamed or poached                            | 80 | 4   | B | 3 |
| 26125121 | 5800_Seafood | Ocean perch, baked or broiled, fat not added in cooking | 79 | 4   | B | 3 |
| 26133160 | 5800_Seafood | Porgy, steamed or poached                               | 79 | 4   | B | 3 |
| 26129121 | 5800_Seafood | Pike, baked or broiled, fat not added in cooking        | 79 | 4   | B | 3 |
| 26311180 | 5800_Seafood | Lobster, canned                                         | 79 | 4   | B | 3 |
| 26157160 | 5800_Seafood | Whiting, steamed or poached                             | 79 | 4   | B | 3 |
| 26103121 | 5800_Seafood | Barracuda, baked or broiled, fat not added in cooking   | 79 | 4   | C | 3 |
| 26213121 | 5800_Seafood | Squid, baked or broiled, fat not added in cooking       | 79 | 4   | B | 3 |
| 26121180 | 5800_Seafood | Mackerel, canned                                        | 79 | 4   | B | 3 |
| 26119121 | 5800_Seafood | Herring, baked or broiled, fat not added in cooking     | 79 | 4   | C | 3 |
| 26125160 | 5800_Seafood | Ocean perch, steamed or poached                         | 79 | 4   | B | 3 |
| 26127123 | 5800_Seafood | Perch, baked or broiled, made without fat               | 79 | 4   | B | 3 |
| 26315130 | 5800_Seafood | Oysters, steamed                                        | 78 | 3.5 | B | 3 |
| 26301110 | 5800_Seafood | Abalone, cooked, NS as to cooking method                | 78 | 4   | C | 3 |
| 26158013 | 5800_Seafood | Tilapia, baked or broiled, made without fat             | 78 | 4   | B | 3 |
| 26105190 | 5800_Seafood | Carp, smoked                                            | 78 | 3.5 | C | 3 |
| 26119170 | 5800_Seafood | Herring, dried, salted                                  | 78 | 0.5 | E | 3 |
| 26303100 | 5800_Seafood | Clams, raw                                              | 78 | 4.5 | A | 1 |
| 26305121 | 5800_Seafood | Crab, baked or broiled, fat not added in cooking        | 77 | 3.5 | C | 3 |
| 26147190 | 5800_Seafood | Sturgeon, smoked                                        | 77 | 3.5 | D | 3 |
| 26129160 | 5800_Seafood | Pike, steamed or poached                                | 77 | 4   | B | 3 |
| 26127160 | 5800_Seafood | Perch, steamed or poached                               | 77 | 4   | B | 3 |
| 26103160 | 5800_Seafood | Barracuda, steamed or poached                           | 77 | 4   | C | 3 |

Supplementary Table 8. Original (uncorrected) scores for all food items.

|          |              |                                                              |    |     |   |   |
|----------|--------------|--------------------------------------------------------------|----|-----|---|---|
| 26319170 | 5800_Seafood | Shrimp, dried                                                | 77 | 0.5 | D | 3 |
| 26111121 | 5800_Seafood | Croaker, baked or broiled, fat not added in cooking          | 77 | 4   | B | 3 |
| 26158050 | 5800_Seafood | Tilapia, steamed or poached                                  | 76 | 4   | B | 3 |
| 26135121 | 5800_Seafood | Ray, baked or broiled, fat not added in cooking              | 76 | 4   | B | 3 |
| 26143121 | 5800_Seafood | Shark, baked or broiled, fat not added in cooking            | 76 | 4   | B | 3 |
| 26137121 | 5800_Seafood | Salmon, baked or broiled, made with butter                   | 75 | 4   | C | 3 |
| 26303110 | 5800_Seafood | Clams, cooked, NS as to cooking method                       | 75 | 4   | B | 3 |
| 26303120 | 5800_Seafood | Clams, baked or broiled, fat added in cooking                | 75 | 4   | B | 3 |
| 26213170 | 5800_Seafood | Squid, dried                                                 | 75 | 2   | D | 3 |
| 26109124 | 5800_Seafood | Cod, baked or broiled, made with cooking spray               | 75 | 4   | B | 3 |
| 26111160 | 5800_Seafood | Croaker, steamed or poached                                  | 75 | 4   | B | 3 |
| 26109123 | 5800_Seafood | Cod, baked or broiled, made without fat                      | 74 | 4   | B | 3 |
| 26131110 | 5800_Seafood | Pompano, cooked, NS as to cooking method                     | 74 | 3.5 | C | 3 |
| 26131120 | 5800_Seafood | Pompano, baked or broiled, fat added in cooking              | 74 | 3.5 | C | 3 |
| 26205160 | 5800_Seafood | Octopus, steamed                                             | 74 | 4   | C | 3 |
| 26311110 | 5800_Seafood | Lobster, cooked, NS as to cooking method                     | 74 | 3.5 | C | 3 |
| 26107120 | 5800_Seafood | Catfish, baked or broiled, made with oil                     | 74 | 3.5 | C | 3 |
| 26135160 | 5800_Seafood | Ray, steamed or poached                                      | 74 | 4   | B | 3 |
| 26143160 | 5800_Seafood | Shark, steamed or poached                                    | 74 | 4   | B | 3 |
| 26118021 | 5800_Seafood | Halibut, baked or broiled, made with butter                  | 74 | 4   | B | 3 |
| 26123121 | 5800_Seafood | Mullet, baked or broiled, fat not added in cooking           | 74 | 4   | B | 3 |
| 26313110 | 5800_Seafood | Mussels, cooked, NS as to cooking method                     | 74 | 3.5 | D | 3 |
| 26313160 | 5800_Seafood | Mussels, steamed or poached                                  | 74 | 3.5 | D | 3 |
| 26211100 | 5800_Seafood | Roe, sturgeon                                                | 73 | 1   | D | 3 |
| 26117190 | 5800_Seafood | Haddock, smoked                                              | 73 | 4   | C | 3 |
| 26213160 | 5800_Seafood | Squid, steamed or boiled                                     | 73 | 4   | B | 3 |
| 26109160 | 5800_Seafood | Cod, steamed or poached                                      | 72 | 4   | B | 3 |
| 26107124 | 5800_Seafood | Catfish, baked or broiled, made with cooking spray           | 72 | 4   | B | 3 |
| 26123160 | 5800_Seafood | Mullet, steamed or poached                                   | 72 | 4   | B | 3 |
| 26107123 | 5800_Seafood | Catfish, baked or broiled, made without fat                  | 72 | 4   | B | 3 |
| 26107122 | 5800_Seafood | Catfish, baked or broiled, made with margarine               | 72 | 3.5 | C | 3 |
| 26100121 | 5800_Seafood | Fish, NS as to type, baked or broiled, made with butter      | 72 | 4   | B | 3 |
| 26311121 | 5800_Seafood | Lobster, baked or broiled, fat not added in cooking          | 72 | 3.5 | C | 3 |
| 26303180 | 5800_Seafood | Clams, canned                                                | 72 | 4.5 | A | 3 |
| 26119190 | 5800_Seafood | Herring, smoked, kippered                                    | 71 | 2   | D | 3 |
| 26151121 | 5800_Seafood | Trout, baked or broiled, made with butter                    | 71 | 4   | C | 3 |
| 26315110 | 5800_Seafood | Oysters, cooked, NS as to cooking method                     | 70 | 3   | C | 4 |
| 26107160 | 5800_Seafood | Catfish, steamed or poached                                  | 70 | 4   | B | 3 |
| 26311160 | 5800_Seafood | Lobster, steamed or boiled                                   | 69 | 3.5 | C | 3 |
| 26131121 | 5800_Seafood | Pompano, baked or broiled, fat not added in cooking          | 69 | 3.5 | C | 3 |
| 27150140 | 5800_Seafood | Clam sauce, white                                            | 69 | 3   | C | 4 |
| 26213180 | 5800_Seafood | Squid, pickled                                               | 69 | 1.5 | D | 3 |
| 26131190 | 5800_Seafood | Pompano, smoked                                              | 68 | 3.5 | C | 3 |
| 26109190 | 5800_Seafood | Cod, smoked                                                  | 68 | 4   | B | 3 |
| 26317121 | 5800_Seafood | Scallops, baked or broiled, fat not added in cooking         | 68 | 4   | B | 3 |
| 26153130 | 5800_Seafood | Tuna, fresh, coated, baked or broiled, fat added in cooking  | 67 | 4   | B | 4 |
| 26315160 | 5800_Seafood | Oysters, coated, baked or broiled, fat added in cooking      | 67 | 3.5 | B | 4 |
| 26101110 | 5800_Seafood | Anchovy, cooked, NS as to cooking method                     | 67 | 0.5 | D | 3 |
| 26101180 | 5800_Seafood | Anchovy, canned                                              | 67 | 0.5 | D | 3 |
| 26131160 | 5800_Seafood | Pompano, steamed or poached                                  | 67 | 3.5 | C | 3 |
| 26141180 | 5800_Seafood | Sea bass, pickled                                            | 67 | 3.5 | B | 4 |
| 26205110 | 5800_Seafood | Octopus, cooked, NS as to cooking method                     | 66 | 3.5 | C | 4 |
| 26121160 | 5800_Seafood | Mackerel, pickled                                            | 66 | 3   | D | 4 |
| 26137130 | 5800_Seafood | Salmon, coated, baked or broiled, made with oil              | 66 | 4   | B | 4 |
| 26118030 | 5800_Seafood | Halibut, coated, baked or broiled, made with oil             | 65 | 4   | B | 4 |
| 26303121 | 5800_Seafood | Clams, baked or broiled, fat not added in cooking            | 64 | 4   | B | 3 |
| 26315140 | 5800_Seafood | Oysters, coated, fried                                       | 63 | 3   | C | 4 |
| 26158011 | 5800_Seafood | Tilapia, baked or broiled, made with butter                  | 63 | 4   | B | 3 |
| 26153140 | 5800_Seafood | Tuna, fresh, coated, fried                                   | 63 | 4   | B | 4 |
| 26121131 | 5800_Seafood | Mackerel, coated, baked or broiled, fat added in cooking     | 62 | 3.5 | C | 4 |
| 26319121 | 5800_Seafood | Shrimp, baked or broiled, made with butter                   | 62 | 3.5 | C | 3 |
| 26305130 | 5800_Seafood | Crab, coated, baked or broiled, fat added in cooking         | 62 | 3.5 | C | 4 |
| 26149130 | 5800_Seafood | Swordfish, coated, baked or broiled, fat added in cooking    | 62 | 3.5 | C | 4 |
| 26113110 | 5800_Seafood | Eel, cooked, NS as to cooking method                         | 62 | 3.5 | C | 4 |
| 26137140 | 5800_Seafood | Salmon, coated, fried, made with oil                         | 62 | 3.5 | C | 4 |
| 26105110 | 5800_Seafood | Carp, cooked, NS as to cooking method                        | 62 | 3.5 | C | 4 |
| 26115121 | 5800_Seafood | Flounder, baked or broiled, made with butter                 | 61 | 3.5 | B | 3 |
| 26127121 | 5800_Seafood | Perch, baked or broiled, made with butter                    | 61 | 4   | B | 3 |
| 26137132 | 5800_Seafood | Salmon, coated, baked or broiled, made with margarine        | 61 | 4   | B | 4 |
| 26103130 | 5800_Seafood | Barracuda, coated, baked or broiled, fat added in cooking    | 60 | 3.5 | C | 4 |
| 26118040 | 5800_Seafood | Halibut, coated, fried, made with oil                        | 60 | 4   | B | 4 |
| 26317130 | 5800_Seafood | Scallops, steamed or boiled                                  | 60 | 4   | C | 3 |
| 26118032 | 5800_Seafood | Halibut, coated, baked or broiled, made with margarine       | 60 | 4   | B | 4 |
| 26109121 | 5800_Seafood | Cod, baked or broiled, made with butter                      | 60 | 3.5 | C | 3 |
| 26157110 | 5800_Seafood | Whiting, cooked, NS as to cooking method                     | 60 | 4   | B | 4 |
| 26100130 | 5800_Seafood | Fish, NS as to type, coated, baked or broiled, made with oil | 60 | 4   | B | 4 |
| 26105130 | 5800_Seafood | Carp, coated, baked or broiled, fat added in cooking         | 60 | 4   | B | 4 |
| 26100170 | 5800_Seafood | Fish, NS as to type, dried                                   | 60 | 0.5 | D | 3 |
| 26109170 | 5800_Seafood | Cod, dried, salted                                           | 60 | 0.5 | D | 3 |
| 26117130 | 5800_Seafood | Haddock, coated, baked or broiled, fat added in cooking      | 60 | 4   | B | 4 |
| 26309140 | 5800_Seafood | Crayfish, coated, fried                                      | 60 | 4   | B | 4 |
| 26151130 | 5800_Seafood | Trout, coated, baked or broiled, made with oil               | 60 | 4   | C | 4 |
| 26213130 | 5800_Seafood | Squid, coated, baked or broiled, fat added in cooking        | 59 | 4   | B | 4 |
| 26127110 | 5800_Seafood | Perch, cooked, NS as to cooking method                       | 59 | 4   | B | 4 |
| 26137134 | 5800_Seafood | Salmon, coated, baked or broiled, made with cooking spray    | 59 | 4   | B | 4 |
| 27150110 | 5800_Seafood | Shrimp cocktail                                              | 59 | 4   | B | 4 |



Supplementary Table 8. Original (uncorrected) scores for all food items.

|          |              |                                                                        |    |     |   |   |
|----------|--------------|------------------------------------------------------------------------|----|-----|---|---|
| 26118034 | 5800_Seafood | Halibut, coated, baked or broiled, made with cooking spray             | 59 | 4   | B | 4 |
| 26115110 | 5800_Seafood | Flounder, cooked, NS as to cooking method                              | 58 | 3.5 | C | 4 |
| 26157121 | 5800_Seafood | Whiting, baked or broiled, made with butter                            | 58 | 4   | B | 3 |
| 26137133 | 5800_Seafood | Salmon, coated, baked or broiled, made without fat                     | 58 | 4   | B | 4 |
| 26307140 | 5800_Seafood | Crab, soft shell, coated, fried                                        | 58 | 3.5 | C | 4 |
| 26301160 | 5800_Seafood | Abalone, steamed or poached                                            | 58 | 3.5 | D | 3 |
| 26121140 | 5800_Seafood | Mackerel, coated, fried                                                | 58 | 3.5 | D | 4 |
| 26121132 | 5800_Seafood | Mackerel, coated, baked or broiled, fat not added in cooking           | 58 | 3.5 | C | 4 |
| 26149140 | 5800_Seafood | Swordfish, coated, fried                                               | 58 | 3.5 | C | 4 |
| 26153131 | 5800_Seafood | Tuna, fresh, coated, baked or broiled, fat not added                   | 57 | 4   | B | 4 |
| 26109130 | 5800_Seafood | Cod, coated, baked or broiled, made with oil                           | 57 | 3.5 | B | 4 |
| 26107121 | 5800_Seafood | Catfish, baked or broiled, made with butter                            | 57 | 3.5 | C | 3 |
| 26147140 | 5800_Seafood | Sturgeon, coated, fried                                                | 57 | 3.5 | C | 4 |
| 26133130 | 5800_Seafood | Porgy, coated, baked or broiled, fat added in cooking                  | 57 | 4   | B | 4 |
| 26118033 | 5800_Seafood | Halibut, coated, baked or broiled, made without fat                    | 57 | 4   | B | 4 |
| 26311170 | 5800_Seafood | Lobster, coated, baked or broiled, fat added in cooking                | 57 | 3.5 | C | 4 |
| 26123110 | 5800_Seafood | Mullet, cooked, NS as to cooking method                                | 57 | 3.5 | C | 4 |
| 26303160 | 5800_Seafood | Clams, steamed or boiled                                               | 57 | 4   | B | 3 |
| 26119130 | 5800_Seafood | Herring, coated, baked or broiled, fat added in cooking                | 57 | 3.5 | C | 4 |
| 26319110 | 5800_Seafood | Shrimp, cooked, NS as to cooking method                                | 57 | 3.5 | B | 4 |
| 26129130 | 5800_Seafood | Pike, coated, baked or broiled, fat added in cooking                   | 56 | 4   | B | 4 |
| 26203110 | 5800_Seafood | Frog legs, NS as to cooking method                                     | 56 | 4   | B | 4 |
| 26127130 | 5800_Seafood | Perch, coated, baked or broiled, made with oil                         | 56 | 4   | B | 4 |
| 26137142 | 5800_Seafood | Salmon, coated, fried, made with margarine                             | 56 | 3.5 | C | 4 |
| 26151132 | 5800_Seafood | Trout, coated, baked or broiled, made with margarine                   | 56 | 4   | C | 4 |
| 26117140 | 5800_Seafood | Haddock, coated, fried                                                 | 56 | 4   | B | 4 |
| 26213140 | 5800_Seafood | Squid, coated, fried                                                   | 56 | 3.5 | C | 4 |
| 26151140 | 5800_Seafood | Trout, coated, fried, made with oil                                    | 56 | 3.5 | C | 4 |
| 26157130 | 5800_Seafood | Whiting, coated, baked or broiled, made with oil                       | 56 | 4   | B | 4 |
| 26100132 | 5800_Seafood | Fish, NS as to type, coated, baked or broiled, made with margarine     | 56 | 4   | B | 4 |
| 26100140 | 5800_Seafood | Fish, NS as to type, coated, fried, made with oil                      | 56 | 3.5 | C | 4 |
| 26158020 | 5800_Seafood | Tilapia, coated, baked or broiled, made with oil                       | 56 | 4   | B | 4 |
| 26111130 | 5800_Seafood | Croaker, coated, baked or broiled, fat added in cooking                | 56 | 4   | B | 4 |
| 26141130 | 5800_Seafood | Sea bass, coated, baked or broiled, fat added in cooking               | 56 | 4   | B | 4 |
| 26149131 | 5800_Seafood | Swordfish, coated, baked or broiled, fat not added in cooking          | 56 | 4   | B | 4 |
| 26103140 | 5800_Seafood | Barracuda, coated, fried                                               | 56 | 3.5 | C | 4 |
| 26303190 | 5800_Seafood | Clams, smoked, in oil                                                  | 55 | 3.5 | C | 3 |
| 26100200 | 5800_Seafood | Fish, NS as to type, from fast food                                    | 55 | 3.5 | C | 4 |
| 26125130 | 5800_Seafood | Ocean perch, coated, baked or broiled, fat added in cooking            | 55 | 3.5 | B | 4 |
| 26119180 | 5800_Seafood | Herring, pickled                                                       | 55 | 2   | D | 3 |
| 26105140 | 5800_Seafood | Carp, coated, fried                                                    | 55 | 3.5 | C | 4 |
| 26118042 | 5800_Seafood | Halibut, coated, fried, made with margarine                            | 55 | 4   | B | 4 |
| 26315161 | 5800_Seafood | Oysters, coated, baked or broiled, fat not added in cooking            | 55 | 3.5 | B | 4 |
| 26115130 | 5800_Seafood | Flounder, coated, baked or broiled, made with oil                      | 55 | 3.5 | B | 4 |
| 26103131 | 5800_Seafood | Barracuda, coated, baked or broiled, fat not added in cooking          | 54 | 4   | C | 4 |
| 26319160 | 5800_Seafood | Shrimp, coated, baked or broiled, made with oil                        | 54 | 3.5 | B | 4 |
| 26131130 | 5800_Seafood | Pompano, coated, baked or broiled, fat added in cooking                | 54 | 3.5 | C | 4 |
| 26151134 | 5800_Seafood | Trout, coated, baked or broiled, made with cooking spray               | 54 | 4   | B | 4 |
| 26129110 | 5800_Seafood | Pike, cooked, NS as to cooking method                                  | 54 | 4   | B | 4 |
| 26137144 | 5800_Seafood | Salmon, coated, fried, made with cooking spray                         | 54 | 4   | C | 4 |
| 26317160 | 5800_Seafood | Scallops, coated, baked or broiled, fat added in cooking               | 54 | 3.5 | B | 4 |
| 27150070 | 5800_Seafood | Lobster with butter sauce                                              | 54 | 3.5 | D | 3 |
| 26109140 | 5800_Seafood | Cod, coated, fried, made with oil                                      | 54 | 3.5 | B | 4 |
| 26105131 | 5800_Seafood | Carp, coated, baked or broiled, fat not added in cooking               | 54 | 4   | B | 4 |
| 26111140 | 5800_Seafood | Croaker, coated, fried                                                 | 54 | 3.5 | C | 4 |
| 26135130 | 5800_Seafood | Ray, coated, baked or broiled, fat added in cooking                    | 53 | 4   | B | 4 |
| 26143130 | 5800_Seafood | Shark, coated, baked or broiled, fat added in cooking                  | 53 | 4   | B | 4 |
| 26133140 | 5800_Seafood | Porgy, coated, fried                                                   | 53 | 3.5 | C | 4 |
| 26100134 | 5800_Seafood | Fish, NS as to type, coated, baked or broiled, made with cooking spray | 53 | 4   | B | 4 |
| 26151133 | 5800_Seafood | Trout, coated, baked or broiled, made without fat                      | 53 | 4   | B | 4 |
| 26157140 | 5800_Seafood | Whiting, coated, fried, made with oil                                  | 53 | 4   | B | 4 |
| 26311140 | 5800_Seafood | Lobster, coated, fried                                                 | 53 | 3.5 | C | 4 |
| 26123130 | 5800_Seafood | Mullet, coated, baked or broiled, fat added in cooking                 | 53 | 4   | B | 4 |
| 26137143 | 5800_Seafood | Salmon, coated, fried, made without fat                                | 53 | 4   | C | 4 |
| 26127140 | 5800_Seafood | Perch, coated, fried, made with oil                                    | 53 | 4   | B | 4 |
| 26125140 | 5800_Seafood | Ocean perch, coated, fried                                             | 52 | 3.5 | B | 4 |
| 26100133 | 5800_Seafood | Fish, NS as to type, coated, baked or broiled, made without fat        | 52 | 4   | B | 4 |
| 26158030 | 5800_Seafood | Tilapia, coated, fried, made with oil                                  | 52 | 4   | C | 4 |
| 26119140 | 5800_Seafood | Herring, coated, fried                                                 | 52 | 3.5 | C | 4 |
| 26129140 | 5800_Seafood | Pike, coated, fried                                                    | 52 | 4   | B | 4 |
| 26118044 | 5800_Seafood | Halibut, coated, fried, made with cooking spray                        | 52 | 4   | B | 4 |
| 26151142 | 5800_Seafood | Trout, coated, fried, made with margarine                              | 52 | 4   | C | 4 |
| 26141140 | 5800_Seafood | Sea bass, coated, fried                                                | 52 | 3.5 | C | 4 |
| 26100142 | 5800_Seafood | Fish, NS as to type, coated, fried, made with margarine                | 52 | 3.5 | C | 4 |
| 26115140 | 5800_Seafood | Flounder, coated, fried, made with oil                                 | 51 | 3.5 | C | 4 |
| 26119131 | 5800_Seafood | Herring, coated, baked or broiled, fat not added in cooking            | 51 | 3.5 | C | 4 |
| 26109132 | 5800_Seafood | Cod, coated, baked or broiled, made with margarine                     | 51 | 3.5 | B | 4 |
| 26158022 | 5800_Seafood | Tilapia, coated, baked or broiled, made with margarine                 | 51 | 4   | B | 4 |
| 26127132 | 5800_Seafood | Perch, coated, baked or broiled, made with margarine                   | 51 | 4   | B | 4 |
| 26118043 | 5800_Seafood | Halibut, coated, fried, made without fat                               | 51 | 4   | B | 4 |
| 26107110 | 5800_Seafood | Cattish, cooked, NS as to cooking method                               | 51 | 3.5 | C | 4 |
| 26157132 | 5800_Seafood | Whiting, coated, baked or broiled, made with margarine                 | 51 | 4   | B | 4 |
| 26303130 | 5800_Seafood | Clams, coated, baked or broiled, fat added in cooking                  | 50 | 4   | B | 4 |
| 26123140 | 5800_Seafood | Mullet, coated, fried                                                  | 50 | 3.5 | C | 4 |
| 26143140 | 5800_Seafood | Shark, coated, fried                                                   | 50 | 3.5 | C | 4 |
| 26135140 | 5800_Seafood | Ray, coated, fried                                                     | 50 | 3.5 | C | 4 |

Supplementary Table 8. Original (uncorrected) scores for all food items.

|          |              |                                                                   |    |     |   |   |
|----------|--------------|-------------------------------------------------------------------|----|-----|---|---|
| 26319140 | 5800_Seafood | Shrimp, coated, fried, made with oil                              | 50 | 3.5 | B | 4 |
| 26115132 | 5800_Seafood | Flounder, coated, baked or broiled, made with margarine           | 49 | 3.5 | B | 4 |
| 26305131 | 5800_Seafood | Crab, coated, baked or broiled, fat not added in cooking          | 49 | 3.5 | C | 4 |
| 26131140 | 5800_Seafood | Pompano, coated, fried                                            | 49 | 3.5 | D | 4 |
| 26319162 | 5800_Seafood | Shrimp, coated, baked or broiled, made with margarine             | 49 | 4   | B | 4 |
| 26317140 | 5800_Seafood | Scallops, coated, fried                                           | 49 | 3.5 | C | 4 |
| 26109142 | 5800_Seafood | Cod, coated, fried, made with margarine                           | 49 | 3.5 | C | 4 |
| 26133131 | 5800_Seafood | Porgy, coated, baked or broiled, fat not added in cooking         | 48 | 4   | B | 4 |
| 26127134 | 5800_Seafood | Perch, coated, baked or broiled, made with cooking spray          | 48 | 4   | B | 4 |
| 26117131 | 5800_Seafood | Haddock, coated, baked or broiled, fat not added in cooking       | 48 | 4   | B | 4 |
| 26100144 | 5800_Seafood | Fish, NS as to type, coated, fried, made with cooking spray       | 48 | 4   | C | 4 |
| 26151144 | 5800_Seafood | Trout, coated, fried, made with cooking spray                     | 48 | 4   | B | 4 |
| 26119160 | 5800_Seafood | Herring, pickled, in cream sauce                                  | 48 | 2   | D | 3 |
| 26213131 | 5800_Seafood | Squid, coated, baked or broiled, fat not added in cooking         | 48 | 4   | A | 4 |
| 26158032 | 5800_Seafood | Tilapia, coated, fried, made with margarine                       | 48 | 4   | C | 4 |
| 26137131 | 5800_Seafood | Salmon, coated, baked or broiled, made with butter                | 47 | 3.5 | C | 4 |
| 26129131 | 5800_Seafood | Pike, coated, baked or broiled, fat not added in cooking          | 47 | 4   | A | 4 |
| 26151143 | 5800_Seafood | Trout, coated, fried, made without fat                            | 47 | 4   | B | 4 |
| 26100143 | 5800_Seafood | Fish, NS as to type, coated, fried, made without fat              | 47 | 4   | C | 4 |
| 26157142 | 5800_Seafood | Whiting, coated, fried, made with margarine                       | 47 | 3.5 | C | 4 |
| 26301140 | 5800_Seafood | Abalone, floured or breaded, fried                                | 47 | 3.5 | C | 4 |
| 26135131 | 5800_Seafood | Ray, coated, baked or broiled, fat not added in cooking           | 47 | 4   | B | 4 |
| 26143131 | 5800_Seafood | Shark, coated, baked or broiled, fat not added in cooking         | 47 | 4   | B | 4 |
| 26127142 | 5800_Seafood | Perch, coated, fried, made with margarine                         | 47 | 4   | B | 4 |
| 26141131 | 5800_Seafood | Sea bass, coated, baked or broiled, fat not added in cooking      | 47 | 4   | B | 4 |
| 26158024 | 5800_Seafood | Tilapia, coated, baked or broiled, made with cooking spray        | 47 | 4   | B | 4 |
| 26157134 | 5800_Seafood | Whiting, coated, baked or broiled, made with cooking spray        | 47 | 4   | B | 4 |
| 26115142 | 5800_Seafood | Flounder, coated, fried, made with margarine                      | 47 | 3.5 | C | 4 |
| 26131131 | 5800_Seafood | Pompano, coated, baked or broiled, fat not added in cooking       | 47 | 3.5 | C | 4 |
| 26107130 | 5800_Seafood | Catfish, coated, baked or broiled, made with oil                  | 47 | 3.5 | C | 4 |
| 26127133 | 5800_Seafood | Perch, coated, baked or broiled, made without fat                 | 46 | 4   | B | 4 |
| 26303140 | 5800_Seafood | Clams, coated, fried                                              | 46 | 3.5 | B | 4 |
| 26111131 | 5800_Seafood | Croaker, coated, baked or broiled, fat not added in cooking       | 46 | 4   | B | 4 |
| 26319142 | 5800_Seafood | Shrimp, coated, fried, made with margarine                        | 45 | 3.5 | C | 4 |
| 26158023 | 5800_Seafood | Tilapia, coated, baked or broiled, made without fat               | 45 | 4   | B | 4 |
| 26157133 | 5800_Seafood | Whiting, coated, baked or broiled, made without fat               | 45 | 4   | B | 4 |
| 26115134 | 5800_Seafood | Flounder, coated, baked or broiled, made with cooking spray       | 44 | 4   | B | 4 |
| 26319164 | 5800_Seafood | Shrimp, coated, baked or broiled, made with cooking spray         | 44 | 4   | B | 4 |
| 26107140 | 5800_Seafood | Catfish, coated, fried, made with oil                             | 44 | 3.5 | C | 4 |
| 26151131 | 5800_Seafood | Trout, coated, baked or broiled, made with butter                 | 44 | 3.5 | C | 4 |
| 26109134 | 5800_Seafood | Cod, coated, baked or broiled, made with cooking spray            | 44 | 4   | B | 4 |
| 26123131 | 5800_Seafood | Mullet, coated, baked or broiled, fat not added in cooking        | 44 | 4   | B | 4 |
| 26118031 | 5800_Seafood | Halibut, coated, baked or broiled, made with butter               | 44 | 3.5 | C | 4 |
| 26125131 | 5800_Seafood | Ocean perch, coated, baked or broiled, fat not added in cooking   | 44 | 4   | B | 4 |
| 26109133 | 5800_Seafood | Cod, coated, baked or broiled, made without fat                   | 43 | 4   | B | 4 |
| 26107132 | 5800_Seafood | Catfish, coated, baked or broiled, made with margarine            | 43 | 3.5 | C | 4 |
| 26311171 | 5800_Seafood | Lobster, coated, baked or broiled, fat not added in cooking       | 43 | 3.5 | C | 4 |
| 26115133 | 5800_Seafood | Flounder, coated, baked or broiled, made without fat              | 43 | 4   | B | 4 |
| 26127144 | 5800_Seafood | Perch, coated, fried, made with cooking spray                     | 42 | 4   | B | 4 |
| 26319163 | 5800_Seafood | Shrimp, coated, baked or broiled, made without fat                | 41 | 4   | B | 4 |
| 26317161 | 5800_Seafood | Scallops, coated, baked or broiled, fat not added in cooking      | 41 | 3.5 | B | 4 |
| 26100131 | 5800_Seafood | Fish, NS as to type, coated, baked or broiled, made with butter   | 41 | 3.5 | C | 4 |
| 26127143 | 5800_Seafood | Perch, coated, fried, made without fat                            | 41 | 4   | B | 4 |
| 26158034 | 5800_Seafood | Tilapia, coated, fried, made with cooking spray                   | 41 | 4   | B | 4 |
| 26107134 | 5800_Seafood | Catfish, coated, baked or broiled, made with cooking spray        | 41 | 4   | B | 4 |
| 26157144 | 5800_Seafood | Whiting, coated, fried, made with cooking spray                   | 41 | 4   | B | 4 |
| 26107133 | 5800_Seafood | Catfish, coated, baked or broiled, made without fat               | 40 | 4   | B | 4 |
| 26109144 | 5800_Seafood | Cod, coated, fried, made with cooking spray                       | 40 | 4   | B | 4 |
| 26100260 | 5800_Seafood | Fish stick, patty or nugget from fast food                        | 40 | 3   | C | 4 |
| 26100270 | 5800_Seafood | Fish stick, patty or nugget from restaurant, home, or other place | 40 | 3   | C | 4 |
| 26137141 | 5800_Seafood | Salmon, coated, fried, made with butter                           | 40 | 3.5 | D | 4 |
| 26158033 | 5800_Seafood | Tilapia, coated, fried, made without fat                          | 40 | 4   | B | 4 |
| 26107142 | 5800_Seafood | Catfish, coated, fried, made with margarine                       | 40 | 3.5 | C | 4 |
| 26319144 | 5800_Seafood | Shrimp, coated, fried, made with cooking spray                    | 40 | 4   | B | 4 |
| 26157143 | 5800_Seafood | Whiting, coated, fried, made without fat                          | 39 | 4   | B | 4 |
| 26115144 | 5800_Seafood | Flounder, coated, fried, made with cooking spray                  | 39 | 4   | B | 4 |
| 26109143 | 5800_Seafood | Cod, coated, fried, made without fat                              | 38 | 4   | B | 4 |
| 26319143 | 5800_Seafood | Shrimp, coated, fried, made without fat                           | 38 | 4   | B | 4 |
| 26115143 | 5800_Seafood | Flounder, coated, fried, made without fat                         | 37 | 4   | B | 4 |
| 26303131 | 5800_Seafood | Clams, coated, baked or broiled, fat not added in cooking         | 37 | 4   | A | 4 |
| 26319145 | 5800_Seafood | Shrimp, coated, fried, from fast food / restaurant                | 37 | 1.5 | D | 4 |
| 26107144 | 5800_Seafood | Catfish, coated, fried, made with cooking spray                   | 36 | 3.5 | C | 4 |
| 26118041 | 5800_Seafood | Halibut, coated, fried, made with butter                          | 36 | 3.5 | D | 4 |
| 26158021 | 5800_Seafood | Tilapia, coated, baked or broiled, made with butter               | 36 | 3.5 | C | 4 |
| 26151141 | 5800_Seafood | Trout, coated, fried, made with butter                            | 35 | 2   | D | 4 |
| 26107143 | 5800_Seafood | Catfish, coated, fried, made without fat                          | 35 | 3.5 | C | 4 |
| 26109131 | 5800_Seafood | Cod, coated, baked or broiled, made with butter                   | 34 | 3.5 | C | 4 |
| 26127131 | 5800_Seafood | Perch, coated, baked or broiled, made with butter                 | 34 | 3.5 | C | 4 |
| 26157131 | 5800_Seafood | Whiting, coated, baked or broiled, made with butter               | 34 | 3.5 | C | 4 |
| 26100141 | 5800_Seafood | Fish, NS as to type, coated, fried, made with butter              | 33 | 3   | D | 4 |
| 26115131 | 5800_Seafood | Flounder, coated, baked or broiled, made with butter              | 33 | 3.5 | C | 4 |
| 26319161 | 5800_Seafood | Shrimp, coated, baked or broiled, made with butter                | 32 | 3.5 | C | 4 |
| 26107131 | 5800_Seafood | Catfish, coated, baked or broiled, made with butter               | 30 | 3.5 | C | 4 |
| 27250520 | 5800_Seafood | Seafood restructured                                              | 29 | 3   | C | 4 |
| 26158031 | 5800_Seafood | Tilapia, coated, fried, made with butter                          | 28 | 3.5 | D | 4 |
| 26109141 | 5800_Seafood | Cod, coated, fried, made with butter                              | 28 | 3   | D | 4 |

Supplementary Table 8. Original (uncorrected) scores for all food items.

|          |              |                                           |    |     |   |   |
|----------|--------------|-------------------------------------------|----|-----|---|---|
| 26157141 | 5800_Seafood | Whiting, coated, fried, made with butter  | 27 | 3.5 | D | 4 |
| 26127141 | 5800_Seafood | Perch, coated, fried, made with butter    | 27 | 3.5 | D | 4 |
| 26115141 | 5800_Seafood | Flounder, coated, fried, made with butter | 26 | 3   | D | 4 |
| 26319141 | 5800_Seafood | Shrimp, coated, fried, made with butter   | 24 | 3   | D | 4 |
| 26107141 | 5800_Seafood | Catfish, coated, fried, made with butter  | 23 | 2   | D | 4 |

Supplementary Table 8. Original (uncorrected) scores for all food items.

| foodcode | level1nd   | Description                                                                       | Food Compass Score | Health Star Rating | Nutri-Score | NOVA Category |
|----------|------------|-----------------------------------------------------------------------------------|--------------------|--------------------|-------------|---------------|
| 11350030 | 6000_Dairy | Almond milk, unsweetened, chocolate                                               | 95                 | 4                  | A           | 4             |
| 11411300 | 6000_Dairy | Yogurt, nonfat milk, plain                                                        | 95                 | 5                  | A           | 1             |
| 11411420 | 6000_Dairy | Yogurt, Greek, nonfat milk, plain                                                 | 95                 | 5                  | A           | 1             |
| 11400010 | 6000_Dairy | Yogurt, Greek, NS as to type of milk or flavor                                    | 90                 | 5                  | A           | 1             |
| 11411390 | 6000_Dairy | Yogurt, Greek, NS as to type of milk, plain                                       | 90                 | 5                  | A           | 1             |
| 11411410 | 6000_Dairy | Yogurt, Greek, low fat milk, plain                                                | 90                 | 5                  | A           | 1             |
| 11410000 | 6000_Dairy | Yogurt, NS as to type of milk or flavor                                           | 90                 | 5                  | A           | 1             |
| 11400000 | 6000_Dairy | Yogurt, NFS                                                                       | 88                 | 5                  | A           | 1             |
| 11411010 | 6000_Dairy | Yogurt, NS as to type of milk, plain                                              | 87                 | 5                  | A           | 1             |
| 11411200 | 6000_Dairy | Yogurt, low fat milk, plain                                                       | 87                 | 5                  | A           | 1             |
| 11434300 | 6000_Dairy | Yogurt, nonfat milk, flavors other than fruit                                     | 86                 | 5                  | A           | 1             |
| 11350020 | 6000_Dairy | Almond milk, unsweetened                                                          | 86                 | 4                  | A           | 4             |
| 11411100 | 6000_Dairy | Yogurt, whole milk, plain                                                         | 81                 | 5                  | B           | 1             |
| 11435030 | 6000_Dairy | Yogurt, Greek, nonfat milk, flavors other than fruit                              | 80                 | 5                  | A           | 4             |
| 11513855 | 6000_Dairy | Chocolate milk, made from sugar free syrup with non-dairy milk                    | 79                 | 1.5                | B           | 4             |
| 11320100 | 6000_Dairy | Soy milk, light                                                                   | 79                 | 2                  | A           | 4             |
| 11513395 | 6000_Dairy | Chocolate milk, made from no sugar added dry mix with non-dairy milk (Nesquik)    | 77                 | 0.5                | B           | 4             |
| 11434020 | 6000_Dairy | Yogurt, Greek, nonfat milk, fruit                                                 | 76                 | 5                  | A           | 4             |
| 11514360 | 6000_Dairy | Hot chocolate / Cocoa, made with no sugar added dry mix and non-dairy milk        | 74                 | 0.5                | B           | 4             |
| 11513370 | 6000_Dairy | Chocolate milk, made from reduced sugar mix with fat free milk                    | 72                 | 4.5                | A           | 4             |
| 11513394 | 6000_Dairy | Chocolate milk, made from no sugar added dry mix with fat free milk (Nesquik)     | 72                 | 4.5                | A           | 4             |
| 11300100 | 6000_Dairy | Non-dairy milk, NFS                                                               | 71                 | 1.5                | B           | 4             |
| 11320000 | 6000_Dairy | Soy milk                                                                          | 71                 | 1.5                | A           | 4             |
| 11513854 | 6000_Dairy | Chocolate milk, made from sugar free syrup with fat free milk                     | 70                 | 5                  | A           | 4             |
| 11513375 | 6000_Dairy | Chocolate milk, made from reduced sugar mix with non-dairy milk                   | 69                 | 0.5                | B           | 4             |
| 11321100 | 6000_Dairy | Soy milk, light, chocolate                                                        | 68                 | 0.5                | B           | 4             |
| 11321200 | 6000_Dairy | Soy milk, nonfat, chocolate                                                       | 68                 | 0.5                | B           | 4             |
| 11446000 | 6000_Dairy | Yogurt parfait, low fat, with fruit                                               | 68                 | 5                  | B           | 4             |
| 11113000 | 6000_Dairy | Milk, fat free (skim)                                                             | 67                 | 4.5                | A           | 1             |
| 11114320 | 6000_Dairy | Milk, lactose free, fat free (skim)                                               | 67                 | 4.5                | A           | 1             |
| 11433000 | 6000_Dairy | Yogurt, nonfat milk, fruit                                                        | 67                 | 5                  | B           | 4             |
| 11111170 | 6000_Dairy | Milk, calcium fortified, fat free (skim)                                          | 66                 | 5                  | A           | 1             |
| 11411400 | 6000_Dairy | Yogurt, Greek, whole milk, plain                                                  | 65                 | 5                  | A           | 4             |
| 11120000 | 6000_Dairy | Milk, dry, reconstituted, NS as to fat content                                    | 65                 | 4.5                | B           | 1             |
| 11121300 | 6000_Dairy | Milk, dry, reconstituted, fat free (skim)                                         | 65                 | 4.5                | B           | 1             |
| 11434090 | 6000_Dairy | Yogurt, NS as to type of milk, flavors other than fruit                           | 65                 | 5                  | A           | 4             |
| 11434200 | 6000_Dairy | Yogurt, low fat milk, flavors other than fruit                                    | 65                 | 5                  | A           | 4             |
| 11434100 | 6000_Dairy | Yogurt, whole milk, flavors other than fruit                                      | 64                 | 5                  | B           | 1             |
| 11514350 | 6000_Dairy | Hot chocolate / Cocoa, made with no sugar added dry mix and fat free milk         | 64                 | 4                  | B           | 4             |
| 11350000 | 6000_Dairy | Almond milk, sweetened                                                            | 62                 | 3.5                | B           | 4             |
| 11321000 | 6000_Dairy | Soy milk, chocolate                                                               | 61                 | 0.5                | B           | 4             |
| 11514310 | 6000_Dairy | Hot chocolate / Cocoa, made with no sugar added dry mix and water                 | 61                 | 4                  | B           | 4             |
| 11350010 | 6000_Dairy | Almond milk, sweetened, chocolate                                                 | 60                 | 3                  | B           | 4             |
| 11320200 | 6000_Dairy | Soy milk, nonfat                                                                  | 59                 | 2                  | A           | 4             |
| 11513805 | 6000_Dairy | Chocolate milk, made from light syrup with non-dairy milk                         | 59                 | 0.5                | B           | 4             |
| 11435100 | 6000_Dairy | Yogurt, Greek, with oats                                                          | 58                 | 5                  | A           | 4             |
| 11513310 | 6000_Dairy | Chocolate milk, made from dry mix with non-dairy milk                             | 58                 | 0.5                | B           | 4             |
| 11513385 | 6000_Dairy | Chocolate milk, made from dry mix with non-dairy milk (Nesquik)                   | 58                 | 0.5                | B           | 4             |
| 14109020 | 6000_Dairy | Cheese, Swiss, reduced sodium                                                     | 58                 | 0.5                | C           | 3             |
| 14206010 | 6000_Dairy | Cheese, cottage, lowfat, low sodium                                               | 57                 | 5                  | A           | 3             |
| 11111160 | 6000_Dairy | Milk, calcium fortified, low fat (1%)                                             | 57                 | 4.5                | A           | 1             |
| 11112120 | 6000_Dairy | Milk, acidophilus, low fat (1%)                                                   | 57                 | 4.5                | A           | 1             |
| 11112210 | 6000_Dairy | Milk, low fat (1%)                                                                | 57                 | 4.5                | A           | 1             |
| 11114300 | 6000_Dairy | Milk, lactose free, low fat (1%)                                                  | 57                 | 4.5                | A           | 1             |
| 11212050 | 6000_Dairy | Milk, evaporated, fat free (skim)                                                 | 56                 | 4.5                | A           | 2             |
| 14107040 | 6000_Dairy | Cheese, Mozzarella, reduced sodium                                                | 56                 | 0.5                | C           | 3             |
| 11513365 | 6000_Dairy | Chocolate milk, made from reduced sugar mix with low fat milk                     | 56                 | 4.5                | A           | 4             |
| 11513393 | 6000_Dairy | Chocolate milk, made from no sugar added dry mix with low fat milk (Nesquik)      | 56                 | 4.5                | A           | 4             |
| 11115400 | 6000_Dairy | Kefir, NS as to fat content                                                       | 56                 | 4.5                | A           | 1             |
| 11121210 | 6000_Dairy | Milk, dry, reconstituted, low fat (1%)                                            | 56                 | 4.5                | B           | 1             |
| 14610520 | 6000_Dairy | Cheese with nuts                                                                  | 56                 | 0.5                | D           | 3             |
| 11433990 | 6000_Dairy | Yogurt, Greek, NS as to type of milk, fruit                                       | 55                 | 5                  | A           | 4             |
| 11434010 | 6000_Dairy | Yogurt, Greek, low fat milk, fruit                                                | 55                 | 5                  | A           | 4             |
| 11513853 | 6000_Dairy | Chocolate milk, made from sugar free syrup with low fat milk                      | 55                 | 5                  | A           | 4             |
| 11430000 | 6000_Dairy | Yogurt, NS as to type of milk, fruit                                              | 55                 | 5                  | B           | 4             |
| 11432000 | 6000_Dairy | Yogurt, low fat milk, fruit                                                       | 55                 | 5                  | B           | 4             |
| 11436000 | 6000_Dairy | Yogurt, liquid                                                                    | 55                 | 5                  | B           | 4             |
| 14207010 | 6000_Dairy | Cheese, cottage, lowfat, lactose reduced                                          | 54                 | 5                  | A           | 3             |
| 11513350 | 6000_Dairy | Chocolate milk, made from reduced sugar mix, NS as to type of milk                | 53                 | 4                  | B           | 4             |
| 11513390 | 6000_Dairy | Chocolate milk, made from no sugar added dry mix, NS as to type of milk (Nesquik) | 53                 | 4                  | B           | 4             |
| 11435000 | 6000_Dairy | Yogurt, Greek, NS as to type of milk, flavors other than fruit                    | 53                 | 5                  | A           | 4             |
| 11435020 | 6000_Dairy | Yogurt, Greek, low fat milk, flavors other than fruit                             | 53                 | 5                  | A           | 4             |
| 11100000 | 6000_Dairy | Milk, NFS                                                                         | 53                 | 4                  | B           | 1             |
| 11519215 | 6000_Dairy | Strawberry milk, non-dairy                                                        | 53                 | 0.5                | B           | 4             |
| 11513360 | 6000_Dairy | Chocolate milk, made from reduced sugar mix with reduced fat milk                 | 53                 | 4                  | B           | 4             |
| 11513392 | 6000_Dairy | Chocolate milk, made from no sugar added dry mix with reduced fat milk (Nesquik)  | 53                 | 4                  | B           | 4             |
| 11513384 | 6000_Dairy | Chocolate milk, made from dry mix with fat free milk (Nesquik)                    | 53                 | 4                  | B           | 4             |
| 11360000 | 6000_Dairy | Rice milk                                                                         | 53                 | 1                  | B           | 4             |
| 11112110 | 6000_Dairy | Milk, reduced fat (2%)                                                            | 52                 | 4                  | B           | 1             |
| 11112130 | 6000_Dairy | Milk, acidophilus, reduced fat (2%)                                               | 52                 | 4                  | B           | 1             |
| 11114330 | 6000_Dairy | Milk, lactose free, reduced fat (2%)                                              | 52                 | 4                  | B           | 1             |
| 11513300 | 6000_Dairy | Chocolate milk, made from dry mix with fat free milk                              | 52                 | 4                  | B           | 4             |
| 11519040 | 6000_Dairy | Strawberry milk, NFS                                                              | 52                 | 4                  | B           | 1             |
| 11111100 | 6000_Dairy | Milk, low sodium, whole                                                           | 51                 | 3.5                | B           | 1             |
| 11513850 | 6000_Dairy | Chocolate milk, made from sugar free syrup, NS as to type of milk                 | 51                 | 4.5                | A           | 4             |

Supplementary Table 8. Original (uncorrected) scores for all food items.

|          |            |                                                                              |    |     |   |   |
|----------|------------|------------------------------------------------------------------------------|----|-----|---|---|
| 11513804 | 6000_Dairy | Chocolate milk, made from light syrup with fat free milk                     | 50 | 4   | B | 1 |
| 11513852 | 6000_Dairy | Chocolate milk, made from sugar free syrup with reduced fat milk             | 50 | 4.5 | A | 4 |
| 11513355 | 6000_Dairy | Chocolate milk, made from reduced sugar mix with whole milk                  | 50 | 4   | B | 4 |
| 11513391 | 6000_Dairy | Chocolate milk, made from no sugar added dry mix with whole milk (Nesquik)   | 50 | 4   | B | 4 |
| 11431000 | 6000_Dairy | Yogurt, whole milk, fruit                                                    | 50 | 5   | C | 4 |
| 11514340 | 6000_Dairy | Hot chocolate / Cocoa, made with no sugar added dry mix and low fat milk     | 50 | 4   | B | 4 |
| 11111000 | 6000_Dairy | Milk, whole                                                                  | 49 | 3.5 | B | 1 |
| 11111150 | 6000_Dairy | Milk, calcium fortified, whole                                               | 49 | 3.5 | B | 1 |
| 11114350 | 6000_Dairy | Milk, lactose free, whole                                                    | 49 | 3.5 | B | 1 |
| 14110010 | 6000_Dairy | Cheese, Cheddar, reduced sodium                                              | 49 | 0.5 | C | 3 |
| 14502000 | 6000_Dairy | Imitation cheese                                                             | 49 | 0.5 | D | 4 |
| 11211400 | 6000_Dairy | Milk, evaporated, reduced fat (2%)                                           | 49 | 3.5 | B | 2 |
| 14109030 | 6000_Dairy | Cheese, Swiss, reduced fat                                                   | 48 | 5   | B | 3 |
| 14410130 | 6000_Dairy | Cheese, American, nonfat or fat free                                         | 48 | 0.5 | C | 4 |
| 11513750 | 6000_Dairy | Chocolate milk, made from syrup with non-dairy milk                          | 48 | 0.5 | B | 4 |
| 11513851 | 6000_Dairy | Chocolate milk, made from sugar free syrup with whole milk                   | 48 | 4   | B | 4 |
| 11435010 | 6000_Dairy | Yogurt, Greek, whole milk, flavors other than fruit                          | 47 | 5   | B | 4 |
| 11514330 | 6000_Dairy | Hot chocolate / Cocoa, made with no sugar added dry mix and reduced fat milk | 47 | 3.5 | B | 4 |
| 11519205 | 6000_Dairy | Strawberry milk, fat free                                                    | 47 | 3.5 | B | 1 |
| 11514320 | 6000_Dairy | Hot chocolate / Cocoa, made with no sugar added dry mix and whole milk       | 47 | 3   | B | 4 |
| 11121100 | 6000_Dairy | Milk, dry, reconstituted, whole                                              | 46 | 3.5 | B | 1 |
| 41420380 | 6000_Dairy | Yogurt, soy                                                                  | 46 | 3.5 | A | 4 |
| 14410210 | 6000_Dairy | Cheese, American, reduced sodium                                             | 46 | 0.5 | C | 4 |
| 11116000 | 6000_Dairy | Goat's milk, whole                                                           | 45 | 4   | B | 1 |
| 14109040 | 6000_Dairy | Cheese, Swiss, nonfat or fat free                                            | 44 | 4   | C | 3 |
| 14200100 | 6000_Dairy | Cheese, cottage, NFS                                                         | 44 | 5   | B | 3 |
| 14204010 | 6000_Dairy | Cheese, cottage, low fat                                                     | 44 | 5   | B | 3 |
| 11511550 | 6000_Dairy | Chocolate milk, ready to drink, reduced sugar, NS as to milk                 | 44 | 4.5 | A | 1 |
| 11514150 | 6000_Dairy | Hot chocolate / Cocoa, made with dry mix and non-dairy milk                  | 44 | 0.5 | C | 4 |
| 11115300 | 6000_Dairy | Buttermilk, whole                                                            | 43 | 4   | B | 1 |
| 11434000 | 6000_Dairy | Yogurt, Greek, whole milk, fruit                                             | 43 | 5   | B | 4 |
| 11115200 | 6000_Dairy | Buttermilk, reduced fat (2%)                                                 | 43 | 3.5 | B | 1 |
| 14107060 | 6000_Dairy | Cheese, Mozzarella, nonfat or fat free                                       | 42 | 5   | B | 3 |
| 11512030 | 6000_Dairy | Hot chocolate / Cocoa, ready to drink, made with non-dairy milk              | 42 | 0.5 | C | 4 |
| 42401010 | 6000_Dairy | Coconut milk, used in cooking                                                | 41 | 0.5 | C | 2 |
| 14201500 | 6000_Dairy | Cheese, Ricotta                                                              | 41 | 5   | C | 3 |
| 11513803 | 6000_Dairy | Chocolate milk, made from light syrup with low fat milk                      | 40 | 4   | B | 1 |
| 14203010 | 6000_Dairy | Cheese, cottage, dry curd                                                    | 40 | 5   | A | 3 |
| 14107010 | 6000_Dairy | Cheese, Mozzarella, NFS                                                      | 40 | 0.5 | D | 3 |
| 14107030 | 6000_Dairy | Cheese, Mozzarella, part skim                                                | 40 | 0.5 | D | 3 |
| 11514140 | 6000_Dairy | Hot chocolate / Cocoa, made with dry mix and fat free milk                   | 40 | 3.5 | B | 4 |
| 11511700 | 6000_Dairy | Chocolate milk, ready to drink, low fat, no sugar added (Nesquik)            | 40 | 4   | B | 4 |
| 14109010 | 6000_Dairy | Cheese, Swiss                                                                | 40 | 0.5 | D | 3 |
| 11115000 | 6000_Dairy | Buttermilk, fat free (skim)                                                  | 39 | 4   | B | 1 |
| 11115100 | 6000_Dairy | Buttermilk, low fat (1%)                                                     | 39 | 4   | B | 1 |
| 14203510 | 6000_Dairy | Puerto Rican white cheese                                                    | 39 | 3   | C | 3 |
| 11513200 | 6000_Dairy | Chocolate milk, made from dry mix with low fat milk                          | 38 | 4   | B | 4 |
| 11513383 | 6000_Dairy | Chocolate milk, made from dry mix with low fat milk (Nesquik)                | 38 | 4   | B | 4 |
| 11210050 | 6000_Dairy | Milk, evaporated, NS as to fat content                                       | 38 | 2   | C | 2 |
| 11211050 | 6000_Dairy | Milk, evaporated, whole                                                      | 38 | 2   | C | 2 |
| 11519200 | 6000_Dairy | Strawberry milk, low fat                                                     | 38 | 3.5 | B | 1 |
| 14104110 | 6000_Dairy | Cheese, Cheddar, reduced fat                                                 | 36 | 0.5 | D | 3 |
| 14108420 | 6000_Dairy | Cheese, provolone, reduced fat                                               | 36 | 0.5 | D | 3 |
| 14107250 | 6000_Dairy | Cheese, Muenster, reduced fat                                                | 36 | 0.5 | D | 3 |
| 11513802 | 6000_Dairy | Chocolate milk, made from light syrup with reduced fat milk                  | 36 | 3.5 | B | 1 |
| 14203020 | 6000_Dairy | Cheese, cottage, salted, dry curd                                            | 36 | 5   | C | 3 |
| 14104400 | 6000_Dairy | Cheese, Feta                                                                 | 36 | 0.5 | D | 3 |
| 14120020 | 6000_Dairy | Cheese, Mexican blend, reduced fat                                           | 35 | 0.5 | D | 3 |
| 11513000 | 6000_Dairy | Chocolate milk, made from dry mix, NS as to type of milk                     | 35 | 3.5 | B | 4 |
| 11513380 | 6000_Dairy | Chocolate milk, made from dry mix, NS as to type of milk (Nesquik)           | 35 | 3.5 | B | 4 |
| 14204030 | 6000_Dairy | Cheese, cottage, lowfat, with vegetables                                     | 35 | 5   | A | 3 |
| 14108060 | 6000_Dairy | Cheese, Parmesan, dry grated, fat free                                       | 35 | 0.5 | D | 3 |
| 14201010 | 6000_Dairy | Cheese, cottage, creamed, large or small curd                                | 34 | 5   | B | 3 |
| 11526000 | 6000_Dairy | Milk, malted                                                                 | 34 | 3.5 | B | 4 |
| 11513150 | 6000_Dairy | Chocolate milk, made from dry mix with reduced fat milk                      | 34 | 3.5 | B | 4 |
| 11513382 | 6000_Dairy | Chocolate milk, made from dry mix with reduced fat milk (Nesquik)            | 34 | 3.5 | B | 4 |
| 14410380 | 6000_Dairy | Cheese, processed cream cheese product, nonfat or fat free                   | 33 | 4   | C | 4 |
| 14104115 | 6000_Dairy | Cheese, Cheddar, nonfat or fat free                                          | 33 | 4.5 | C | 3 |
| 14010000 | 6000_Dairy | Cheese, NFS                                                                  | 32 | 0.5 | E | 3 |
| 14103010 | 6000_Dairy | Cheese, Camembert                                                            | 32 | 0.5 | D | 3 |
| 11511400 | 6000_Dairy | Chocolate milk, ready to drink, low fat                                      | 32 | 4   | B | 4 |
| 14105010 | 6000_Dairy | Cheese, Gouda or Edam                                                        | 32 | 0.5 | D | 3 |
| 14108015 | 6000_Dairy | Cheese, Parmesan, dry grated, reduced fat                                    | 32 | 0.5 | D | 3 |
| 11511600 | 6000_Dairy | Chocolate milk, ready to drink, low fat (Nesquik)                            | 32 | 4   | B | 4 |
| 14204020 | 6000_Dairy | Cheese, cottage, lowfat, with fruit                                          | 32 | 5   | A | 4 |
| 11513100 | 6000_Dairy | Chocolate milk, made from dry mix with whole milk                            | 32 | 3   | B | 4 |
| 11513381 | 6000_Dairy | Chocolate milk, made from dry mix with whole milk (Nesquik)                  | 31 | 3   | B | 4 |
| 11511200 | 6000_Dairy | Chocolate milk, ready to drink, reduced fat                                  | 31 | 3   | B | 4 |
| 14133000 | 6000_Dairy | Queso Fresco                                                                 | 31 | 0.5 | D | 3 |
| 14120010 | 6000_Dairy | Cheese, Mexican blend                                                        | 31 | 0.5 | D | 3 |
| 14107020 | 6000_Dairy | Cheese, Mozzarella, whole milk                                               | 31 | 0.5 | D | 3 |
| 14134000 | 6000_Dairy | Queso cotija                                                                 | 31 | 0.5 | E | 3 |
| 14108020 | 6000_Dairy | Cheese, Parmesan, hard                                                       | 31 | 0.5 | E | 3 |
| 14108010 | 6000_Dairy | Cheese, Parmesan, dry grated                                                 | 31 | 0.5 | E | 3 |
| 14105200 | 6000_Dairy | Cheese, Gruyere                                                              | 31 | 0.5 | D | 3 |
| 14102010 | 6000_Dairy | Cheese, Brick                                                                | 31 | 0.5 | D | 3 |

Supplementary Table 8. Original (uncorrected) scores for all food items.

|          |            |                                                                                   |    |     |   |   |
|----------|------------|-----------------------------------------------------------------------------------|----|-----|---|---|
| 14107200 | 6000_Dairy | Cheese, Muenster                                                                  | 30 | 0.5 | D | 3 |
| 14106500 | 6000_Dairy | Cheese, Monterey, reduced fat                                                     | 30 | 0.5 | D | 3 |
| 14108400 | 6000_Dairy | Cheese, Provolone                                                                 | 30 | 0.5 | D | 3 |
| 14108200 | 6000_Dairy | Cheese, Port du Salut                                                             | 30 | 0.5 | D | 3 |
| 14104700 | 6000_Dairy | Cheese, goat                                                                      | 30 | 0.5 | D | 3 |
| 14202010 | 6000_Dairy | Cheese, cottage, with fruit                                                       | 30 | 5   | B | 4 |
| 11511100 | 6000_Dairy | Chocolate milk, ready to drink, whole                                             | 29 | 2   | C | 4 |
| 14103020 | 6000_Dairy | Cheese, Brie                                                                      | 29 | 0.5 | D | 3 |
| 14410120 | 6000_Dairy | Cheese, American, reduced fat                                                     | 29 | 0.5 | D | 4 |
| 14410330 | 6000_Dairy | Cheese spread, American or Cheddar cheese base, reduced fat                       | 28 | 0.5 | D | 4 |
| 14202020 | 6000_Dairy | Cheese, cottage, with vegetables                                                  | 28 | 5   | B | 4 |
| 14101010 | 6000_Dairy | Cheese, Blue or Roquefort                                                         | 28 | 0.5 | E | 3 |
| 14106010 | 6000_Dairy | Cheese, Limburger                                                                 | 28 | 0.5 | D | 3 |
| 14104100 | 6000_Dairy | Cheese, Cheddar                                                                   | 28 | 0.5 | D | 3 |
| 14201200 | 6000_Dairy | Cottage cheese, farmer's                                                          | 28 | 5   | C | 3 |
| 14104200 | 6000_Dairy | Cheese, Colby                                                                     | 28 | 0.5 | D | 3 |
| 14104600 | 6000_Dairy | Cheese, Fontina                                                                   | 27 | 0.5 | D | 3 |
| 11560000 | 6000_Dairy | Chocolate milk drink                                                              | 27 | 3   | B | 4 |
| 14410110 | 6000_Dairy | Cheese, American                                                                  | 27 | 0.5 | E | 4 |
| 11514130 | 6000_Dairy | Hot chocolate / Cocoa, made with dry mix and low fat milk                         | 27 | 3.5 | B | 4 |
| 14104250 | 6000_Dairy | Cheese, Colby Jack                                                                | 27 | 0.5 | D | 3 |
| 14106200 | 6000_Dairy | Cheese, Monterey                                                                  | 27 | 0.5 | D | 3 |
| 11513700 | 6000_Dairy | Chocolate milk, made from syrup with fat free milk                                | 27 | 3.5 | B | 4 |
| 11512120 | 6000_Dairy | Hot chocolate / Cocoa, ready to drink, made with non-dairy milk and whipped cream | 26 | 0.5 | C | 4 |
| 14131500 | 6000_Dairy | Queso Asadero                                                                     | 25 | 0.5 | D | 3 |
| 11514120 | 6000_Dairy | Hot chocolate / Cocoa, made with dry mix and reduced fat milk                     | 25 | 2   | C | 4 |
| 11340000 | 6000_Dairy | Imitation milk, non-soy, sweetened                                                | 25 | 1   | B | 4 |
| 14132000 | 6000_Dairy | Queso Chihuahua                                                                   | 25 | 0.5 | D | 3 |
| 11542100 | 6000_Dairy | Milk shake, fast food, chocolate                                                  | 25 | 1   | C | 4 |
| 11543000 | 6000_Dairy | Milk shake, bottled, chocolate                                                    | 25 | 1   | C | 4 |
| 14131000 | 6000_Dairy | Queso Anejo, aged Mexican cheese                                                  | 24 | 0.5 | E | 3 |
| 11531500 | 6000_Dairy | Eggnog, lowfat / light                                                            | 24 | 4   | B | 4 |
| 11514110 | 6000_Dairy | Hot chocolate / Cocoa, made with dry mix and whole milk                           | 24 | 2   | C | 4 |
| 11513800 | 6000_Dairy | Chocolate milk, made from light syrup, NS as to type of milk                      | 24 | 3.5 | B | 4 |
| 11511610 | 6000_Dairy | Chocolate milk, ready to drink, fat free (Nesquik)                                | 23 | 3.5 | B | 4 |
| 11541110 | 6000_Dairy | Milk shake, home recipe, chocolate                                                | 23 | 2   | C | 4 |
| 11511000 | 6000_Dairy | Chocolate milk, NFS                                                               | 23 | 3.5 | B | 4 |
| 11511300 | 6000_Dairy | Chocolate milk, ready to drink, fat free                                          | 23 | 3.5 | B | 4 |
| 11541135 | 6000_Dairy | Milk shake, home recipe, flavors other than chocolate, light                      | 23 | 3   | B | 4 |
| 11541130 | 6000_Dairy | Milk shake, home recipe, chocolate, light                                         | 22 | 3.5 | C | 4 |
| 11513801 | 6000_Dairy | Chocolate milk, made from light syrup with whole milk                             | 22 | 3.5 | B | 4 |
| 14610250 | 6000_Dairy | Cheese, cottage cheese, with gelatin dessert and vegetables                       | 22 | 5   | B | 4 |
| 11541120 | 6000_Dairy | Milk shake, home recipe, flavors other than chocolate                             | 22 | 2   | C | 4 |
| 11512020 | 6000_Dairy | Hot chocolate / Cocoa, ready to drink, made with nonfat milk                      | 21 | 3   | B | 4 |
| 11514100 | 6000_Dairy | Hot chocolate / Cocoa, made with dry mix and water                                | 21 | 3   | B | 4 |
| 14410620 | 6000_Dairy | Cheese, with wine                                                                 | 21 | 0.5 | E | 4 |
| 11543010 | 6000_Dairy | Milk shake, bottled, flavors other than chocolate                                 | 21 | 1.5 | C | 4 |
| 11519105 | 6000_Dairy | Strawberry milk, reduced fat                                                      | 20 | 3   | B | 4 |
| 14410500 | 6000_Dairy | Cheese, processed cheese food                                                     | 20 | 0.5 | E | 4 |
| 11542200 | 6000_Dairy | Milk shake, fast food, flavors other than chocolate                               | 20 | 1.5 | C | 4 |
| 11541400 | 6000_Dairy | Milk shake with malt                                                              | 20 | 2   | C | 4 |
| 11531000 | 6000_Dairy | Eggnog, regular                                                                   | 20 | 3   | B | 4 |
| 14410100 | 6000_Dairy | Cheese, American and Swiss blends                                                 | 20 | 0.5 | E | 4 |
| 14660200 | 6000_Dairy | Mozzarella sticks, breaded, baked, or fried                                       | 19 | 0.5 | D | 4 |
| 11513600 | 6000_Dairy | Chocolate milk, made from syrup with low fat milk                                 | 18 | 3.5 | B | 4 |
| 11519050 | 6000_Dairy | Strawberry milk, whole                                                            | 18 | 3.5 | C | 4 |
| 14420100 | 6000_Dairy | Cheese spread, American or Cheddar cheese base                                    | 18 | 0.5 | E | 4 |
| 14420160 | 6000_Dairy | Cheese spread, Swiss cheese base                                                  | 18 | 0.5 | E | 4 |
| 14420300 | 6000_Dairy | Cheese spread, pressurized can                                                    | 18 | 0.5 | E | 4 |
| 14410600 | 6000_Dairy | Cheese, processed, with vegetables                                                | 17 | 0.5 | E | 4 |
| 11513400 | 6000_Dairy | Chocolate milk, made from syrup, NS as to type of milk                            | 17 | 3   | B | 4 |
| 11513550 | 6000_Dairy | Chocolate milk, made from syrup with reduced fat milk                             | 16 | 3   | B | 4 |
| 11220000 | 6000_Dairy | Milk, condensed, sweetened                                                        | 15 | 0.5 | E | 3 |
| 11513500 | 6000_Dairy | Chocolate milk, made from syrup with whole milk                                   | 15 | 3.5 | C | 4 |
| 11512110 | 6000_Dairy | Hot chocolate / Cocoa, ready to drink, made with nonfat milk and whipped cream    | 13 | 2   | C | 4 |
| 42402010 | 6000_Dairy | Coconut cream, canned, sweetened                                                  | 12 | 0.5 | E | 3 |
| 11512010 | 6000_Dairy | Hot chocolate / Cocoa, ready to drink                                             | 11 | 2   | C | 4 |
| 42401100 | 6000_Dairy | Yogurt, coconut milk                                                              | 11 | 5   | C | 4 |
| 11512100 | 6000_Dairy | Hot chocolate / Cocoa, ready to drink, with whipped cream                         | 10 | 1.5 | C | 4 |
| 14610210 | 6000_Dairy | Cheese, cottage cheese, with gelatin dessert and fruit                            | 7  | 5   | B | 4 |
| 13120810 | 6000_Dairy | Ice cream soda, chocolate                                                         | 6  | 1.5 | C | 4 |
| 14610200 | 6000_Dairy | Cheese, cottage cheese, with gelatin dessert                                      | 5  | 5   | B | 4 |
| 13120800 | 6000_Dairy | Ice cream soda, flavors other than chocolate                                      | 4  | 1.5 | C | 4 |
| 11370000 | 6000_Dairy | Coconut milk                                                                      | 4  | 2   | B | 4 |

Supplementary Table 8. Original (uncorrected) scores for all food items.

| foodcode | level1nd       | Description                                                                          | Food Compass Score | Health Star Rating | Nutri-Score | NOVA Category |
|----------|----------------|--------------------------------------------------------------------------------------|--------------------|--------------------|-------------|---------------|
| 82105800 | 7000_Fats Oils | Canola, soybean and sunflower oil                                                    | 90                 | 3.5                | D           | 2             |
| 82105750 | 7000_Fats Oils | Canola and soybean oil                                                               | 90                 | 3.5                | D           | 2             |
| 82105500 | 7000_Fats Oils | Rapeseed oil                                                                         | 89                 | 4                  | C           | 2             |
| 82101000 | 7000_Fats Oils | Vegetable oil, NFS                                                                   | 89                 | 3                  | D           | 2             |
| 82103500 | 7000_Fats Oils | Flaxseed oil                                                                         | 88                 | 4                  | C           | 2             |
| 82108700 | 7000_Fats Oils | Walnut oil                                                                           | 88                 | 4                  | C           | 2             |
| 82108250 | 7000_Fats Oils | Soybean and sunflower oil                                                            | 88                 | 3.5                | D           | 2             |
| 82108000 | 7000_Fats Oils | Soybean oil                                                                          | 86                 | 3                  | D           | 2             |
| 82104000 | 7000_Fats Oils | Olive oil                                                                            | 85                 | 3                  | D           | 2             |
| 82106000 | 7000_Fats Oils | Safflower oil                                                                        | 85                 | 4                  | C           | 2             |
| 82101300 | 7000_Fats Oils | Almond oil                                                                           | 85                 | 4                  | C           | 2             |
| 82108500 | 7000_Fats Oils | Sunflower oil                                                                        | 85                 | 3.5                | D           | 2             |
| 82102000 | 7000_Fats Oils | Corn oil                                                                             | 85                 | 3.5                | D           | 2             |
| 82107000 | 7000_Fats Oils | Sesame oil                                                                           | 82                 | 3                  | D           | 2             |
| 82109000 | 7000_Fats Oils | Wheat germ oil                                                                       | 80                 | 3.5                | D           | 2             |
| 82105000 | 7000_Fats Oils | Peanut oil                                                                           | 76                 | 3                  | D           | 2             |
| 82103000 | 7000_Fats Oils | Cottonseed oil                                                                       | 64                 | 1.5                | D           | 2             |
| 81103030 | 7000_Fats Oils | Margarine, stick, unsalted                                                           | 58                 | 3.5                | C           | 4             |
| 83101600 | 7000_Fats Oils | Bacon and tomato dressing                                                            | 50                 | 5                  | D           | 4             |
| 83112500 | 7000_Fats Oils | Creamy dressing                                                                      | 49                 | 1                  | D           | 4             |
| 83100100 | 7000_Fats Oils | Salad dressing, NFS, for salads                                                      | 49                 | 1                  | D           | 4             |
| 81102000 | 7000_Fats Oils | Margarine, NFS                                                                       | 47                 | 3                  | D           | 4             |
| 81103080 | 7000_Fats Oils | Margarine-like spread, tub, salted                                                   | 47                 | 3                  | D           | 4             |
| 81200100 | 7000_Fats Oils | Oil or table fat, NFS                                                                | 47                 | 1.5                | D           | 2             |
| 81103130 | 7000_Fats Oils | Margarine like spread, whipped, tub, salted                                          | 47                 | 3                  | D           | 4             |
| 83112000 | 7000_Fats Oils | Avocado dressing                                                                     | 46                 | 4                  | D           | 4             |
| 83114000 | 7000_Fats Oils | Thousand Island dressing                                                             | 46                 | 1.5                | D           | 4             |
| 83112990 | 7000_Fats Oils | Sesame dressing                                                                      | 42                 | 3.5                | D           | 4             |
| 81104011 | 7000_Fats Oils | Margarine like spread, reduced calorie, about 40% fat, made with yogurt, tub, salted | 42                 | 4.5                | D           | 4             |
| 81104010 | 7000_Fats Oils | Margarine-like spread, reduced calorie, about 40% fat, tub, salted                   | 40                 | 4                  | D           | 4             |
| 81104020 | 7000_Fats Oils | Margarine-like spread, reduced calorie, about 40% fat, stick, salted                 | 40                 | 4                  | D           | 4             |
| 81102020 | 7000_Fats Oils | Margarine, tub, salted                                                               | 39                 | 3.5                | D           | 4             |
| 81103020 | 7000_Fats Oils | Margarine, whipped, tub, salted                                                      | 39                 | 3.5                | D           | 4             |
| 83101000 | 7000_Fats Oils | Blue or roquefort cheese dressing                                                    | 39                 | 1                  | D           | 4             |
| 81103090 | 7000_Fats Oils | Margarine-like spread, liquid, salted                                                | 39                 | 3.5                | D           | 4             |
| 83208500 | 7000_Fats Oils | Korean dressing or marinade                                                          | 38                 | 0.5                | D           | 4             |
| 83102000 | 7000_Fats Oils | Caesar dressing                                                                      | 38                 | 0.5                | D           | 4             |
| 81103040 | 7000_Fats Oils | Margarine-like spread, stick, salted                                                 | 37                 | 3                  | D           | 4             |
| 81104500 | 7000_Fats Oils | Vegetable oil-butter spread, stick, salted                                           | 37                 | 3                  | D           | 4             |
| 83104000 | 7000_Fats Oils | French or Catalina dressing                                                          | 36                 | 1                  | D           | 4             |
| 83109000 | 7000_Fats Oils | Russian dressing                                                                     | 35                 | 1.5                | D           | 4             |
| 81102010 | 7000_Fats Oils | Margarine, stick, salted                                                             | 35                 | 2                  | D           | 4             |
| 81104110 | 7000_Fats Oils | Margarine like spread, fat free, liquid, salted                                      | 35                 | 5                  | C           | 4             |
| 81104510 | 7000_Fats Oils | Vegetable oil-butter spread, tub, salted                                             | 34                 | 4                  | D           | 4             |
| 81104050 | 7000_Fats Oils | Margarine like spread, reduced calorie, about 20% fat, tub, salted                   | 34                 | 5                  | D           | 4             |
| 83103000 | 7000_Fats Oils | Coleslaw dressing                                                                    | 32                 | 1.5                | D           | 4             |
| 83106000 | 7000_Fats Oils | Italian dressing, made with vinegar and oil                                          | 31                 | 1.5                | D           | 4             |
| 12310100 | 7000_Fats Oils | Sour cream                                                                           | 30                 | 3.5                | C           | 2             |
| 83202020 | 7000_Fats Oils | French or Catalina dressing, light                                                   | 30                 | 3                  | D           | 4             |
| 12100100 | 7000_Fats Oils | Cream, NS as to light, heavy, or half and half                                       | 30                 | 3.5                | D           | 2             |
| 12120100 | 7000_Fats Oils | Cream, half and half                                                                 | 30                 | 3.5                | D           | 2             |
| 12120106 | 7000_Fats Oils | Cream, half and half, flavored                                                       | 29                 | 3                  | D           | 2             |
| 83105500 | 7000_Fats Oils | Honey mustard dressing                                                               | 29                 | 1.5                | D           | 4             |
| 83112950 | 7000_Fats Oils | Poppy seed dressing                                                                  | 29                 | 0.5                | E           | 4             |
| 83200100 | 7000_Fats Oils | Salad dressing, light, NFS                                                           | 28                 | 2                  | D           | 4             |
| 83210100 | 7000_Fats Oils | Creamy dressing, light                                                               | 28                 | 2                  | D           | 4             |
| 81105020 | 7000_Fats Oils | Butter-margarine blend, tub, salted                                                  | 28                 | 3.5                | D           | 4             |
| 81105500 | 7000_Fats Oils | Butter-vegetable oil blend                                                           | 28                 | 3.5                | D           | 4             |
| 81104550 | 7000_Fats Oils | Vegetable oil-butter spread, reduced calorie, stick, salted                          | 28                 | 3.5                | D           | 4             |
| 12130100 | 7000_Fats Oils | Cream, heavy                                                                         | 28                 | 1                  | D           | 2             |
| 81203000 | 7000_Fats Oils | Shortening, NS as to vegetable or animal                                             | 28                 | 1.5                | D           | 4             |
| 81203100 | 7000_Fats Oils | Shortening, vegetable                                                                | 28                 | 1.5                | D           | 4             |
| 83204500 | 7000_Fats Oils | Honey mustard dressing, light                                                        | 28                 | 2                  | D           | 4             |
| 12310200 | 7000_Fats Oils | Sour cream, half and half                                                            | 27                 | 3.5                | C           | 2             |
| 12110100 | 7000_Fats Oils | Cream, light                                                                         | 27                 | 3.5                | C           | 2             |
| 12120110 | 7000_Fats Oils | Cream, half and half, fat free                                                       | 26                 | 3.5                | D           | 4             |
| 83206500 | 7000_Fats Oils | Sesame dressing, light                                                               | 26                 | 2                  | D           | 4             |
| 83205450 | 7000_Fats Oils | Italian dressing, light                                                              | 26                 | 2                  | D           | 4             |
| 81104560 | 7000_Fats Oils | Vegetable oil-butter spread, reduced calorie, tub, salted                            | 25                 | 3                  | D           | 4             |
| 83201000 | 7000_Fats Oils | Blue or roquefort cheese dressing, light                                             | 24                 | 2                  | D           | 4             |
| 83207000 | 7000_Fats Oils | Thousand Island dressing, light                                                      | 23                 | 3.5                | D           | 4             |
| 12310370 | 7000_Fats Oils | Sour cream, fat free                                                                 | 22                 | 3.5                | B           | 4             |
| 81100000 | 7000_Fats Oils | Table fat, NFS                                                                       | 22                 | 0.5                | E           | 2             |
| 81202000 | 7000_Fats Oils | Lard                                                                                 | 19                 | 1                  | D           | 2             |
| 81203200 | 7000_Fats Oils | Shortening, animal                                                                   | 19                 | 1                  | D           | 2             |
| 83201400 | 7000_Fats Oils | Coleslaw dressing, light                                                             | 18                 | 0.5                | E           | 4             |
| 12310350 | 7000_Fats Oils | Sour cream, light                                                                    | 18                 | 3                  | C           | 4             |
| 12210280 | 7000_Fats Oils | Coffee creamer, liquid, fat free, sugar free, flavored                               | 18                 | 3.5                | C           | 4             |
| 12210310 | 7000_Fats Oils | Coffee creamer, liquid, sugar free, flavored                                         | 18                 | 3.5                | C           | 4             |
| 83300600 | 7000_Fats Oils | Italian dressing, fat free                                                           | 18                 | 2                  | D           | 4             |
| 12310300 | 7000_Fats Oils | Sour cream, reduced fat                                                              | 18                 | 3                  | D           | 4             |
| 12210210 | 7000_Fats Oils | Coffee creamer, liquid, flavored                                                     | 17                 | 2                  | D           | 4             |
| 83115000 | 7000_Fats Oils | Yogurt dressing                                                                      | 14                 | 2                  | D           | 4             |
| 83206000 | 7000_Fats Oils | Russian dressing, light                                                              | 13                 | 2                  | D           | 4             |
| 14303010 | 7000_Fats Oils | Cheese, cream, light or lite                                                         | 12                 | 2                  | D           | 4             |

Supplementary Table 8. Original (uncorrected) scores for all food items.

|          |                |                                              |    |     |   |   |
|----------|----------------|----------------------------------------------|----|-----|---|---|
| 14420210 | 7000_Fats Oils | Cheese spread, cream cheese, light or lite   | 12 | 2   | D | 4 |
| 83300100 | 7000_Fats Oils | Blue or roquefort cheese dressing, fat free  | 12 | 3.5 | D | 4 |
| 81201000 | 7000_Fats Oils | Animal fat or drippings                      | 11 | 0.5 | E | 2 |
| 81105010 | 7000_Fats Oils | Butter-margarine blend, stick, salted        | 11 | 0.5 | E | 4 |
| 81104100 | 7000_Fats Oils | Margarine like spread, fat free, tub, salted | 11 | 5   | D | 4 |
| 12200100 | 7000_Fats Oils | Coffee creamer, NFS                          | 10 | 3   | C | 4 |
| 12210200 | 7000_Fats Oils | Coffee creamer, liquid                       | 10 | 3   | C | 4 |
| 12210520 | 7000_Fats Oils | Coffee creamer, soy, liquid                  | 10 | 3   | C | 4 |
| 83203000 | 7000_Fats Oils | Caesar dressing, light                       | 10 | 1.5 | D | 4 |
| 83300800 | 7000_Fats Oils | Russian dressing, fat free                   | 10 | 3.5 | C | 4 |
| 83301000 | 7000_Fats Oils | Thousand Island dressing, fat free           | 10 | 3.5 | C | 4 |
| 12140000 | 7000_Fats Oils | Cream, whipped                               | 10 | 1   | D | 4 |
| 22621100 | 7000_Fats Oils | Fat back, cooked                             | 9  | 0.5 | E | 3 |
| 12210260 | 7000_Fats Oils | Coffee creamer, liquid, fat free             | 9  | 3.5 | C | 4 |
| 12210505 | 7000_Fats Oils | Coffee creamer, powder, sugar free, flavored | 9  | 1   | D | 4 |
| 81101100 | 7000_Fats Oils | Butter, stick, unsalted                      | 8  | 1   | D | 2 |
| 81101110 | 7000_Fats Oils | Butter, whipped, tub, unsalted               | 8  | 1   | D | 2 |
| 81101120 | 7000_Fats Oils | Butter, whipped, stick, unsalted             | 8  | 1   | D | 2 |
| 81204000 | 7000_Fats Oils | Ghee, clarified butter                       | 7  | 1   | E | 2 |
| 12320100 | 7000_Fats Oils | Sour cream, imitation                        | 7  | 1.5 | D | 4 |
| 12220280 | 7000_Fats Oils | Whipped topping, sugar free                  | 6  | 1.5 | D | 4 |
| 12210400 | 7000_Fats Oils | Coffee creamer, powder                       | 6  | 1   | D | 4 |
| 81100500 | 7000_Fats Oils | Butter, NFS                                  | 5  | 0.5 | E | 2 |
| 81101000 | 7000_Fats Oils | Butter, stick, salted                        | 5  | 0.5 | E | 2 |
| 81101020 | 7000_Fats Oils | Butter, whipped, stick, salted               | 5  | 0.5 | E | 2 |
| 12210430 | 7000_Fats Oils | Coffee creamer, powder, fat free             | 5  | 0.5 | E | 4 |
| 12210440 | 7000_Fats Oils | Coffee creamer, powder, fat free, flavored   | 5  | 0.5 | E | 4 |
| 82101500 | 7000_Fats Oils | Coconut oil                                  | 4  | 1   | E | 2 |
| 14301010 | 7000_Fats Oils | Cheese, cream                                | 3  | 1   | D | 4 |
| 14420200 | 7000_Fats Oils | Cheese spread, cream cheese, regular         | 2  | 1   | D | 4 |
| 83300300 | 7000_Fats Oils | Creamy dressing, fat free                    | 2  | 3.5 | D | 4 |
| 83300900 | 7000_Fats Oils | Salad dressing, fat free, NFS                | 2  | 3.5 | D | 4 |
| 12210270 | 7000_Fats Oils | Coffee creamer, liquid, fat free, flavored   | 2  | 3.5 | D | 4 |
| 12210420 | 7000_Fats Oils | Coffee creamer, powder, flavored             | 1  | 0.5 | E | 4 |
| 12220200 | 7000_Fats Oils | Whipped topping                              | 1  | 0.5 | D | 4 |
| 12220270 | 7000_Fats Oils | Whipped topping, fat free                    | 1  | 1.5 | D | 4 |
| 81101010 | 7000_Fats Oils | Butter, whipped, tub, salted                 | 1  | 0.5 | E | 4 |
| 81101500 | 7000_Fats Oils | Light butter, stick, salted                  | 1  | 1   | E | 4 |
| 81101520 | 7000_Fats Oils | Light butter, whipped, tub, salted           | 1  | 1   | E | 4 |
| 81106010 | 7000_Fats Oils | Butter replacement, fat-free powder          | 1  | 4   | E | 4 |
| 81322000 | 7000_Fats Oils | Honey butter                                 | 1  | 1.5 | E | 4 |
| 83300200 | 7000_Fats Oils | Caesar dressing, fat free                    | 1  | 1.5 | D | 4 |
| 83300400 | 7000_Fats Oils | French or Catalina dressing, fat free        | 1  | 3.5 | D | 4 |
| 83300500 | 7000_Fats Oils | Honey mustard dressing, fat free             | 1  | 1.5 | D | 4 |



Supplementary Table 8. Original (uncorrected) scores for all food items.

| foodcode | level1nd   | Description                                                                                                          | Food Compass Score | Health Star Rating | Nutri-Score | NOVA Category |
|----------|------------|----------------------------------------------------------------------------------------------------------------------|--------------------|--------------------|-------------|---------------|
| 27450180 | 8000_Mixed | Seafood garden salad with seafood, lettuce, vegetables excluding tomato and carrots, no dressing                     | 100                | 5                  | A           | 3             |
| 27450190 | 8000_Mixed | Seafood garden salad with seafood, lettuce, tomato and/or carrots, other vegetables, no dressing                     | 100                | 5                  | A           | 3             |
| 72125500 | 8000_Mixed | Channa Saag                                                                                                          | 100                | 4.5                | A           | 4             |
| 27151030 | 8000_Mixed | Ceviche                                                                                                              | 100                | 4.5                | A           | 3             |
| 27450400 | 8000_Mixed | Shrimp and vegetables including carrots, broccoli, and/or dark-green leafy; no potatoes, no sauce                    | 97                 | 4.5                | A           | 4             |
| 27150330 | 8000_Mixed | Mussels with tomato-based sauce                                                                                      | 95                 | 4                  | B           | 3             |
| 27151070 | 8000_Mixed | Stewed codfish, no potatoes, Puerto Rican style                                                                      | 95                 | 4.5                | A           | 4             |
| 27450310 | 8000_Mixed | Lomi salmon                                                                                                          | 93                 | 5                  | A           | 4             |
| 27351030 | 8000_Mixed | Stewed codfish, Puerto Rican style                                                                                   | 91                 | 5                  | A           | 4             |
| 27450740 | 8000_Mixed | Fish and vegetables including carrots, broccoli, and/or dark-green leafy; no potatoes, soy-based sauce               | 91                 | 4.5                | A           | 4             |
| 41603010 | 8000_Mixed | Lentil soup, home recipe, canned, or ready-to-serve                                                                  | 90                 | 5                  | A           | 3             |
| 75440600 | 8000_Mixed | Vegetable curry                                                                                                      | 90                 | 5                  | A           | 4             |
| 75440300 | 8000_Mixed | Vegetable combinations, including carrots, broccoli, and/or dark-green leafy; cooked, with tomato sauce              | 89                 | 4.5                | A           | 3             |
| 27451060 | 8000_Mixed | Octopus salad, Puerto Rican style                                                                                    | 89                 | 4.5                | A           | 4             |
| 27450600 | 8000_Mixed | Shellfish mixture and vegetables including carrots, broccoli, and/or dark-green leafy; no potatoes, soy-based sauc   | 87                 | 4.5                | A           | 4             |
| 27250060 | 8000_Mixed | Gefilte fish                                                                                                         | 87                 | 4                  | A           | 3             |
| 75316050 | 8000_Mixed | Ratatouille                                                                                                          | 86                 | 4.5                | A           | 3             |
| 27450410 | 8000_Mixed | Shrimp and vegetables including carrots, broccoli, and/or dark-green leafy; no potatoes, soy-based sauce             | 86                 | 4.5                | A           | 4             |
| 75201030 | 8000_Mixed | Artichoke salad in oil                                                                                               | 86                 | 5                  | A           | 3             |
| 27450750 | 8000_Mixed | Fish and vegetables excluding carrots, broccoli, and dark-green leafy; no potatoes, soy-based sauce                  | 86                 | 4                  | A           | 4             |
| 27450760 | 8000_Mixed | Fish shish kabob with vegetables, excluding potatoes                                                                 | 86                 | 4.5                | A           | 4             |
| 27450200 | 8000_Mixed | Seafood garden salad with seafood, lettuce, eggs, vegetables excluding tomato and carrots, no dressing               | 86                 | 4.5                | A           | 4             |
| 27150320 | 8000_Mixed | Fish curry                                                                                                           | 85                 | 4.5                | A           | 4             |
| 27450405 | 8000_Mixed | Shrimp and vegetables excluding carrots, broccoli, and dark-green leafy; no potatoes, no sauce                       | 85                 | 4.5                | A           | 4             |
| 27250070 | 8000_Mixed | Salmon cake or patty                                                                                                 | 84                 | 3.5                | C           | 3             |
| 27150100 | 8000_Mixed | Shrimp curry                                                                                                         | 84                 | 5                  | A           | 4             |
| 72125253 | 8000_Mixed | Spinach, cooked, from canned, with cheese sauce                                                                      | 84                 | 4                  | B           | 4             |
| 41311020 | 8000_Mixed | Sambar, vegetable stew                                                                                               | 84                 | 5                  | A           | 4             |
| 27450700 | 8000_Mixed | Fish and vegetables including carrots, broccoli, and/or dark-green leafy; no potatoes, tomato-based sauce            | 84                 | 4.5                | B           | 4             |
| 75417031 | 8000_Mixed | Peas, cooked, from fresh, with tomato sauce                                                                          | 84                 | 5                  | A           | 3             |
| 58146672 | 8000_Mixed | Pasta, whole grain, with tomato-based sauce, seafood, and added vegetables, home recipe                              | 83                 | 4.5                | A           | 4             |
| 27450210 | 8000_Mixed | Seafood garden salad with seafood, lettuce, eggs, tomato and/or carrots, other vegetables, no dressing               | 83                 | 4.5                | A           | 4             |
| 27250220 | 8000_Mixed | Oyster fritter                                                                                                       | 83                 | 3                  | C           | 4             |
| 75146000 | 8000_Mixed | Greek Salad, no dressing                                                                                             | 83                 | 4.5                | A           | 4             |
| 28350120 | 8000_Mixed | Crab soup, tomato-base                                                                                               | 82                 | 4.5                | A           | 3             |
| 72125251 | 8000_Mixed | Spinach, cooked, from fresh, with cheese sauce                                                                       | 82                 | 4                  | A           | 4             |
| 73111400 | 8000_Mixed | Carrots in tomato sauce                                                                                              | 82                 | 4.5                | A           | 3             |
| 27450610 | 8000_Mixed | Shellfish mixture and vegetables excluding carrots, broccoli, and dark-green leafy; no potatoes, soy-based sauce     | 81                 | 4.5                | A           | 4             |
| 27450420 | 8000_Mixed | Shrimp and vegetables excluding carrots, broccoli, and dark-green leafy; no potatoes, soy-based sauce                | 81                 | 4.5                | A           | 4             |
| 27151040 | 8000_Mixed | Crabs in tomato-based sauce, Puerto Rican style                                                                      | 81                 | 3.5                | C           | 4             |
| 27450470 | 8000_Mixed | Kung Pao shrimp                                                                                                      | 81                 | 4                  | A           | 4             |
| 58146215 | 8000_Mixed | Pasta with sauce, meatless, school lunch                                                                             | 81                 | 5                  | A           | 4             |
| 27446355 | 8000_Mixed | Asian chicken or turkey garden salad with crispy noodles, chicken and/or turkey, lettuce, fruit, nuts, crispy noodle | 81                 | 5                  | A           | 4             |
| 27250210 | 8000_Mixed | Clam cake or patty                                                                                                   | 80                 | 3.5                | C           | 3             |
| 27150350 | 8000_Mixed | Sardines with tomato-based sauce                                                                                     | 80                 | 4                  | C           | 3             |
| 27150370 | 8000_Mixed | Sardines with mustard sauce                                                                                          | 80                 | 4                  | C           | 3             |
| 27450430 | 8000_Mixed | Shrimp shish kabob with vegetables, excluding potatoes                                                               | 79                 | 4.5                | A           | 4             |
| 27450010 | 8000_Mixed | Crab salad                                                                                                           | 79                 | 3                  | C           | 4             |
| 27450110 | 8000_Mixed | Shrimp garden salad, shrimp, lettuce, eggs, tomato and/or carrots, other vegetables, no dressing                     | 79                 | 4.5                | A           | 4             |
| 27251010 | 8000_Mixed | Stewed salmon, Puerto Rican style                                                                                    | 79                 | 4.5                | B           | 4             |
| 75604600 | 8000_Mixed | Gazpacho                                                                                                             | 79                 | 4.5                | B           | 4             |
| 27150310 | 8000_Mixed | Fish with tomato-based sauce                                                                                         | 79                 | 4                  | A           | 3             |
| 58146612 | 8000_Mixed | Pasta, whole grain, with tomato-based sauce and added vegetables, home recipe                                        | 78                 | 4.5                | A           | 4             |
| 75147000 | 8000_Mixed | Spinach salad, no dressing                                                                                           | 78                 | 4.5                | A           | 4             |
| 27450450 | 8000_Mixed | Shrimp creole, no rice                                                                                               | 78                 | 4                  | A           | 4             |
| 27445180 | 8000_Mixed | Moo Goo Gai Pan                                                                                                      | 78                 | 5                  | A           | 4             |
| 27450120 | 8000_Mixed | Shrimp garden salad, shrimp, lettuce, eggs, vegetables excluding tomato and carrots, no dressing                     | 78                 | 4.5                | A           | 4             |
| 27250040 | 8000_Mixed | Crab cake                                                                                                            | 78                 | 3.5                | C           | 4             |
| 58146673 | 8000_Mixed | Pasta, whole grain, with tomato-based sauce, seafood, and added vegetables, ready-to-heat                            | 78                 | 4                  | A           | 4             |
| 27350110 | 8000_Mixed | Bouillabaisse                                                                                                        | 78                 | 4                  | A           | 4             |
| 58146663 | 8000_Mixed | Pasta, whole grain, with tomato-based sauce and seafood, ready-to-heat                                               | 78                 | 4                  | A           | 4             |
| 58146662 | 8000_Mixed | Pasta, whole grain, with tomato-based sauce and seafood, home recipe                                                 | 78                 | 4                  | A           | 4             |
| 28351110 | 8000_Mixed | Fish and vegetable soup, no potatoes, Mexican style                                                                  | 78                 | 4                  | B           | 4             |
| 27451030 | 8000_Mixed | Lobster with sauce, Puerto Rican style                                                                               | 78                 | 4                  | C           | 4             |
| 75306010 | 8000_Mixed | Eggplant in tomato sauce, cooked, fat not added in cooking                                                           | 77                 | 4.5                | A           | 3             |
| 41601080 | 8000_Mixed | Pinto bean soup, home recipe, canned or ready-to-serve                                                               | 77                 | 5                  | A           | 4             |
| 27450150 | 8000_Mixed | Fish, tofu, and vegetables, tempura                                                                                  | 77                 | 4.5                | B           | 4             |
| 41812500 | 8000_Mixed | Tofu and vegetables including carrots, broccoli, and/or dark-green leafy; no potatoes, with soy-based sauce          | 77                 | 4                  | B           | 4             |
| 72125252 | 8000_Mixed | Spinach, cooked, from frozen, with cheese sauce                                                                      | 77                 | 4                  | B           | 4             |
| 28355470 | 8000_Mixed | Seafood soup with vegetables including carrots, broccoli, and/or dark-green leafy; no potatoes                       | 76                 | 4.5                | B           | 4             |
| 72125250 | 8000_Mixed | Spinach, cooked, NS as to form, with cheese sauce                                                                    | 76                 | 4                  | B           | 4             |
| 75440100 | 8000_Mixed | Vegetable combination, including carrots, broccoli, and/or dark-green leafy; cooked, with soy-based sauce            | 76                 | 4                  | B           | 4             |
| 58161325 | 8000_Mixed | Rice, brown, with beans and tomatoes                                                                                 | 76                 | 5                  | A           | 4             |
| 27450064 | 8000_Mixed | Tuna salad, made with creamy dressing                                                                                | 76                 | 3.5                | B           | 4             |
| 27450020 | 8000_Mixed | Lobster salad                                                                                                        | 76                 | 3                  | C           | 4             |
| 72307000 | 8000_Mixed | Spinach soup                                                                                                         | 76                 | 4                  | A           | 4             |
| 58146671 | 8000_Mixed | Pasta, whole grain, with tomato-based sauce, seafood, and added vegetables, restaurant                               | 76                 | 4                  | B           | 4             |
| 75403200 | 8000_Mixed | Beans, string, green, cooked, Szechuan-style                                                                         | 75                 | 4.5                | A           | 4             |
| 28355480 | 8000_Mixed | Seafood soup with vegetables excluding carrots, broccoli, and dark-green leafy; no potatoes                          | 75                 | 4.5                | B           | 4             |
| 27450040 | 8000_Mixed | Shrimp chow mein or chop suey, no noodles                                                                            | 75                 | 5                  | A           | 4             |
| 27450030 | 8000_Mixed | Salmon salad                                                                                                         | 75                 | 3                  | C           | 4             |
| 58175000 | 8000_Mixed | Vada, fried dumpling                                                                                                 | 75                 | 5                  | A           | 4             |
| 58146661 | 8000_Mixed | Pasta, whole grain, with tomato-based sauce and seafood, restaurant                                                  | 75                 | 4                  | B           | 4             |
| 72125231 | 8000_Mixed | Spinach, from fresh, creamed                                                                                         | 75                 | 4                  | A           | 4             |
| 27450710 | 8000_Mixed | Fish and vegetables excluding carrots, broccoli, and dark- green leafy; no potatoes, tomato-based sauce              | 75                 | 4.5                | B           | 4             |

Supplementary Table 8. Original (uncorrected) scores for all food items.

|          |            |                                                                                                                  |    |     |   |   |
|----------|------------|------------------------------------------------------------------------------------------------------------------|----|-----|---|---|
| 27450060 | 8000_Mixed | Tuna salad, made with mayonnaise                                                                                 | 75 | 3.5 | C | 4 |
| 27450080 | 8000_Mixed | Seafood salad                                                                                                    | 75 | 3   | C | 4 |
| 58146613 | 8000_Mixed | Pasta, whole grain, with tomato-based sauce and added vegetables, ready-to-heat                                  | 74 | 4.5 | A | 4 |
| 28355450 | 8000_Mixed | Seafood soup with potatoes and vegetables including carrots, broccoli, and/or dark-green leafy                   | 74 | 4.5 | A | 4 |
| 58146602 | 8000_Mixed | Pasta, whole grain, with tomato-based sauce, home recipe                                                         | 74 | 4.5 | A | 4 |
| 58146652 | 8000_Mixed | Pasta, whole grain, with tomato-based sauce, poultry, and added vegetables, home recipe                          | 74 | 4.5 | A | 4 |
| 75417032 | 8000_Mixed | Peas, cooked, from frozen, with tomato sauce                                                                     | 74 | 4.5 | A | 3 |
| 75417030 | 8000_Mixed | Peas, cooked, NS as to form, with tomato sauce                                                                   | 74 | 4.5 | A | 3 |
| 27446360 | 8000_Mixed | Chicken or turkey caesar garden salad, chicken and/or turkey, lettuce, tomato, cheese, no dressing               | 74 | 5   | A | 4 |
| 28355460 | 8000_Mixed | Seafood soup with potatoes, and vegetables excluding carrots, broccoli, and dark-green leafy                     | 74 | 4.5 | B | 4 |
| 27250160 | 8000_Mixed | Tuna cake or patty                                                                                               | 73 | 3.5 | C | 4 |
| 72306000 | 8000_Mixed | Watercress broth with shrimp                                                                                     | 73 | 4   | B | 4 |
| 58161320 | 8000_Mixed | Rice, brown, with beans                                                                                          | 73 | 5   | A | 4 |
| 27250400 | 8000_Mixed | Shrimp cake or patty                                                                                             | 73 | 4   | B | 4 |
| 27450061 | 8000_Mixed | Tuna salad, made with light mayonnaise                                                                           | 73 | 3.5 | B | 4 |
| 27450063 | 8000_Mixed | Tuna salad, made with light mayonnaise-type salad dressing                                                       | 73 | 3.5 | B | 4 |
| 75439500 | 8000_Mixed | Chow mein or chop suey, meatless, no noodles                                                                     | 72 | 4   | B | 3 |
| 58146603 | 8000_Mixed | Pasta, whole grain, with tomato-based sauce, ready-to-heat                                                       | 72 | 4   | A | 4 |
| 28351120 | 8000_Mixed | Fish soup with potatoes, Mexican style                                                                           | 72 | 3.5 | B | 4 |
| 75440310 | 8000_Mixed | Vegetable combinations, excluding carrots, broccoli, and dark-green leafy; cooked, with tomato sauce             | 72 | 4.5 | A | 3 |
| 58161470 | 8000_Mixed | Rice, brown, with dark green vegetables, NS as to fat added in cooking                                           | 72 | 3.5 | A | 4 |
| 58161474 | 8000_Mixed | Rice, brown, with dark green vegetables, fat added in cooking                                                    | 72 | 3.5 | A | 4 |
| 75232050 | 8000_Mixed | Seaweed, prepared with soy sauce                                                                                 | 72 | 3.5 | C | 3 |
| 58146611 | 8000_Mixed | Pasta, whole grain, with tomato-based sauce and added vegetables, restaurant                                     | 71 | 4.5 | B | 4 |
| 27450067 | 8000_Mixed | Tuna salad, made with light Italian dressing                                                                     | 71 | 3.5 | B | 4 |
| 28150210 | 8000_Mixed | Haddock with chopped spinach, diet frozen meal                                                                   | 71 | 4   | A | 4 |
| 73101210 | 8000_Mixed | Carrots, raw, salad with apples                                                                                  | 71 | 4   | C | 4 |
| 27450066 | 8000_Mixed | Tuna salad, made with Italian dressing                                                                           | 71 | 3.5 | B | 4 |
| 58146601 | 8000_Mixed | Pasta, whole grain, with tomato-based sauce, restaurant                                                          | 71 | 4   | B | 4 |
| 27450100 | 8000_Mixed | Tuna salad with egg                                                                                              | 71 | 3.5 | C | 4 |
| 27141500 | 8000_Mixed | Chili con carne with chicken or turkey and beans                                                                 | 71 | 4.5 | A | 4 |
| 27450062 | 8000_Mixed | Tuna salad, made with mayonnaise-type salad dressing                                                             | 71 | 3.5 | B | 4 |
| 41812510 | 8000_Mixed | Tofu and vegetables excluding carrots, broccoli, and dark-green leafy; no potatoes, with soy-based sauce         | 70 | 4   | B | 4 |
| 58146642 | 8000_Mixed | Pasta, whole grain, with tomato-based sauce and poultry, home recipe                                             | 70 | 4   | A | 4 |
| 75417033 | 8000_Mixed | Peas, cooked, from canned, with tomato sauce                                                                     | 70 | 4.5 | A | 3 |
| 72125310 | 8000_Mixed | Palak Paneer                                                                                                     | 70 | 4.5 | B | 4 |
| 72125232 | 8000_Mixed | Spinach, from frozen, creamed                                                                                    | 70 | 4   | A | 4 |
| 27446300 | 8000_Mixed | Chicken or turkey garden salad, chicken and/or turkey, tomato and/or carrots, other vegetables, no dressing      | 70 | 5   | A | 4 |
| 72125230 | 8000_Mixed | Spinach, NS as to form, creamed                                                                                  | 70 | 4   | A | 4 |
| 58161490 | 8000_Mixed | Rice, brown, with dark green vegetables and tomatoes and/or tomato-based sauce, NS as to fat added in cooking    | 70 | 3.5 | A | 4 |
| 58161494 | 8000_Mixed | Rice, brown, with dark green vegetables and tomatoes and/or tomato-based sauce, fat added in cooking             | 70 | 3.5 | A | 4 |
| 75440110 | 8000_Mixed | Vegetable combination, excluding carrots, broccoli, and dark-green leafy; cooked, with soy-based sauce           | 70 | 4   | C | 4 |
| 58146653 | 8000_Mixed | Pasta, whole grain, with tomato-based sauce, poultry, and added vegetables, ready-to-heat                        | 70 | 4   | A | 4 |
| 75601200 | 8000_Mixed | Cabbage soup, home recipe, canned or ready-to-serve                                                              | 70 | 4.5 | B | 3 |
| 28350310 | 8000_Mixed | Turtle and vegetable soup                                                                                        | 69 | 4.5 | B | 4 |
| 58146643 | 8000_Mixed | Pasta, whole grain, with tomato-based sauce and poultry, ready-to-heat                                           | 69 | 4   | A | 4 |
| 27445125 | 8000_Mixed | Chicken or turkey and vegetables including carrots, broccoli, and/or dark-green leafy; no potatoes, tomato-based | 69 | 4.5 | B | 4 |
| 75649110 | 8000_Mixed | Vegetable soup, home recipe                                                                                      | 69 | 4.5 | B | 3 |
| 58146651 | 8000_Mixed | Pasta, whole grain, with tomato-based sauce, poultry, and added vegetables, restaurant                           | 69 | 4   | B | 4 |
| 58161500 | 8000_Mixed | Rice, brown, with carrots and dark green vegetables, NS as to fat added in cooking                               | 69 | 3.5 | A | 4 |
| 58161504 | 8000_Mixed | Rice, brown, with carrots and dark green vegetables, fat added in cooking                                        | 69 | 3.5 | A | 4 |
| 27420080 | 8000_Mixed | Greens with ham or pork                                                                                          | 69 | 4.5 | A | 4 |
| 58161460 | 8000_Mixed | Rice, brown, with tomatoes and/or tomato based sauce, NS as to fat added in cooking                              | 69 | 4   | A | 4 |
| 58161464 | 8000_Mixed | Rice, brown, with tomatoes and/or tomato based sauce, fat added in cooking                                       | 69 | 4   | A | 4 |
| 27446310 | 8000_Mixed | Chicken or turkey garden salad, chicken and/or turkey, other vegetables excluding tomato and carrots, no dressin | 69 | 5   | A | 4 |
| 58146641 | 8000_Mixed | Pasta, whole grain, with tomato-based sauce and poultry, restaurant                                              | 69 | 4   | B | 4 |
| 75302080 | 8000_Mixed | Bean salad, yellow and/or green string beans                                                                     | 68 | 4.5 | A | 4 |
| 58161520 | 8000_Mixed | Rice, brown, with carrots, dark green vegetables, and tomatoes and/or tomato-based sauce, NS as to fat added in  | 68 | 3.5 | A | 4 |
| 58161524 | 8000_Mixed | Rice, brown, with carrots, dark green vegetables, and tomatoes and/or tomato-based sauce, fat added in cooking   | 68 | 3.5 | A | 4 |
| 58161435 | 8000_Mixed | Rice, brown, with carrots, NS as to fat added in cooking                                                         | 68 | 3.5 | A | 4 |
| 58161439 | 8000_Mixed | Rice, brown, with carrots, fat added in cooking                                                                  | 68 | 3.5 | A | 4 |
| 32101530 | 8000_Mixed | Egg curry                                                                                                        | 68 | 4.5 | A | 4 |
| 58161430 | 8000_Mixed | Rice, brown, with peas, NS as to fat added in cooking                                                            | 68 | 4   | A | 4 |
| 58161434 | 8000_Mixed | Rice, brown, with peas, fat added in cooking                                                                     | 68 | 4   | A | 4 |
| 75141030 | 8000_Mixed | Cabbage salad or coleslaw, made with creamy dressing                                                             | 68 | 4   | C | 4 |
| 27540240 | 8000_Mixed | Chicken fillet, broiled, sandwich, on whole wheat roll, with lettuce, tomato and spread                          | 68 | 4   | A | 4 |
| 28150220 | 8000_Mixed | Flounder with chopped broccoli, diet frozen meal                                                                 | 68 | 4   | A | 4 |
| 58161480 | 8000_Mixed | Rice, brown, with carrots and tomatoes and/or tomato-based sauce, NS as to fat added in cooking                  | 68 | 4   | A | 4 |
| 58161484 | 8000_Mixed | Rice, brown, with carrots and tomatoes and/or tomato-based sauce, fat added in cooking                           | 68 | 4   | A | 4 |
| 27351010 | 8000_Mixed | Codfish with starchy vegetables, Puerto Rican style                                                              | 67 | 5   | A | 4 |
| 58161472 | 8000_Mixed | Rice, brown, with dark green vegetables, fat not added in cooking                                                | 67 | 3.5 | A | 4 |
| 27150410 | 8000_Mixed | Shrimp teriyaki                                                                                                  | 67 | 4   | B | 3 |
| 27446350 | 8000_Mixed | Asian chicken or turkey garden salad, chicken and/or turkey, lettuce, fruit, nuts, no dressing                   | 67 | 5   | A | 4 |
| 27351040 | 8000_Mixed | Biscayne codfish, Puerto Rican style                                                                             | 67 | 4.5 | A | 4 |
| 27350030 | 8000_Mixed | Seafood stew with potatoes and vegetables excluding carrots, broccoli, and dark-green leafy; tomato-based sauce  | 67 | 4.5 | A | 4 |
| 27446330 | 8000_Mixed | Chicken or turkey garden salad with cheese, chicken and/or turkey, cheese, lettuce and/or greens, tomato and/or  | 67 | 5   | A | 4 |
| 27350310 | 8000_Mixed | Seafood stew with potatoes and vegetables including carrots, broccoli, and/or dark-green leafy; tomato-based sai | 66 | 4.5 | A | 4 |
| 27460750 | 8000_Mixed | Liver, beef or calves, and onions                                                                                | 66 | 4   | B | 4 |
| 28355140 | 8000_Mixed | Clam chowder, New England, reduced sodium, canned or ready-to-serve                                              | 66 | 4.5 | B | 4 |
| 27450650 | 8000_Mixed | Shellfish mixture and vegetables including carrots, broccoli, and/or dark-green leafy; no potatoes, mushroom sau | 66 | 3.5 | B | 4 |
| 73101110 | 8000_Mixed | Carrots, raw, salad                                                                                              | 66 | 4   | C | 4 |
| 58175110 | 8000_Mixed | Tabbouleh                                                                                                        | 66 | 4   | C | 4 |
| 75440400 | 8000_Mixed | Vegetables, dipped in chick-pea flour batter, fried, Pakora                                                      | 66 | 4.5 | A | 4 |
| 58161440 | 8000_Mixed | Rice, brown, with peas and carrots, NS as to fat added in cooking                                                | 66 | 4   | A | 4 |
| 58161444 | 8000_Mixed | Rice, brown, with peas and carrots, fat added in cooking                                                         | 66 | 4   | A | 4 |
| 27146150 | 8000_Mixed | Chicken curry                                                                                                    | 65 | 4.5 | A | 4 |

Supplementary Table 8. Original (uncorrected) scores for all food items.

|          |            |                                                                                                                    |    |     |   |   |
|----------|------------|--------------------------------------------------------------------------------------------------------------------|----|-----|---|---|
| 27420100 | 8000_Mixed | Pork, tofu, and vegetables including carrots, broccoli, and/or dark-green leafy; no potatoes, soy-base sauce       | 65 | 4   | A | 4 |
| 72125233 | 8000_Mixed | Spinach, from canned, creamed                                                                                      | 65 | 4   | B | 4 |
| 58161492 | 8000_Mixed | Rice, brown, with dark green vegetables and tomatoes and/or tomato-based sauce, fat not added in cooking           | 65 | 3.5 | A | 4 |
| 28310160 | 8000_Mixed | Beef broth, with tomato, home recipe                                                                               | 65 | 4   | B | 4 |
| 27361010 | 8000_Mixed | Stewed variety meats, mostly liver, Puerto Rican style                                                             | 64 | 4.5 | A | 4 |
| 58161510 | 8000_Mixed | Grape leaves stuffed with rice                                                                                     | 64 | 4.5 | A | 4 |
| 41601070 | 8000_Mixed | Soybean soup, miso broth                                                                                           | 64 | 3.5 | C | 4 |
| 58146632 | 8000_Mixed | Pasta, whole grain, with tomato-based sauce, meat, and added vegetables, home recipe                               | 64 | 4.5 | A | 4 |
| 58161530 | 8000_Mixed | Rice, brown, with other vegetables, NS as to fat added in cooking                                                  | 64 | 3.5 | A | 4 |
| 58161534 | 8000_Mixed | Rice, brown, with other vegetables, fat added in cooking                                                           | 64 | 3.5 | A | 4 |
| 58146315 | 8000_Mixed | Pasta with sauce and meat, from school lunch                                                                       | 64 | 4.5 | A | 4 |
| 28340130 | 8000_Mixed | Chicken or turkey broth, with tomato, home recipe                                                                  | 64 | 4   | B | 4 |
| 27150120 | 8000_Mixed | Tuna with cream or white sauce                                                                                     | 64 | 4   | B | 4 |
| 58161502 | 8000_Mixed | Rice, brown, with carrots and dark green vegetables, fat not added in cooking                                      | 63 | 3.5 | A | 4 |
| 27250128 | 8000_Mixed | Shrimp and noodles with soy-based sauce                                                                            | 63 | 3.5 | B | 4 |
| 42301120 | 8000_Mixed | Peanut butter sandwich, with reduced fat peanut butter, on wheat bread                                             | 63 | 3.5 | C | 4 |
| 42301125 | 8000_Mixed | Peanut butter sandwich, with reduced fat peanut butter, on whole wheat bread                                       | 63 | 3.5 | C | 4 |
| 58146631 | 8000_Mixed | Pasta, whole grain, with tomato-based sauce, meat, and added vegetables, restaurant                                | 63 | 4   | B | 4 |
| 27250250 | 8000_Mixed | Flounder with crab stuffing                                                                                        | 63 | 4   | B | 4 |
| 27415120 | 8000_Mixed | Beef, tofu, and vegetables including carrots, broccoli, and/or dark-green leafy; no potatoes, soy-based sauce      | 63 | 4   | A | 4 |
| 58161482 | 8000_Mixed | Rice, brown, with carrots and tomatoes and/or tomato-based sauce, fat not added in cooking                         | 63 | 4   | A | 4 |
| 58161437 | 8000_Mixed | Rice, brown, with carrots, fat not added in cooking                                                                | 63 | 3.5 | A | 4 |
| 75140510 | 8000_Mixed | Broccoli slaw salad                                                                                                | 63 | 4   | B | 4 |
| 58146621 | 8000_Mixed | Pasta, whole grain, with tomato-based sauce and meat, restaurant                                                   | 63 | 4   | B | 4 |
| 58161432 | 8000_Mixed | Rice, brown, with peas, fat not added in cooking                                                                   | 63 | 4   | A | 4 |
| 75148010 | 8000_Mixed | Cobb salad, no dressing                                                                                            | 63 | 4.5 | A | 4 |
| 58161462 | 8000_Mixed | Rice, brown, with tomatoes and/or tomato based sauce, fat not added in cooking                                     | 63 | 4   | A | 4 |
| 27450068 | 8000_Mixed | Tuna salad, made with any type of fat free dressing                                                                | 63 | 3.5 | A | 4 |
| 75450600 | 8000_Mixed | Vegetable combination, including carrots, broccoli, and/or dark-green leafy; cooked, with butter sauce             | 63 | 4.5 | A | 4 |
| 27451070 | 8000_Mixed | Codfish salad, Puerto Rican style, Serenata                                                                        | 62 | 4   | C | 4 |
| 58160800 | 8000_Mixed | Rice, white, with lentils, NS as to fat added in cooking                                                           | 62 | 5   | A | 4 |
| 58160805 | 8000_Mixed | Rice, white, with lentils, fat added in cooking                                                                    | 62 | 5   | A | 4 |
| 58161522 | 8000_Mixed | Rice, brown, with carrots, dark green vegetables, and tomatoes and/or tomato-based sauce, fat not added in cook    | 62 | 3.5 | A | 4 |
| 58403100 | 8000_Mixed | Noodle and potato soup, Puerto Rican style                                                                         | 62 | 4.5 | B | 3 |
| 42301020 | 8000_Mixed | Peanut butter sandwich, with regular peanut butter, on wheat bread                                                 | 62 | 3.5 | C | 4 |
| 42301025 | 8000_Mixed | Peanut butter sandwich, with regular peanut butter, on whole wheat bread                                           | 62 | 3.5 | C | 4 |
| 74501010 | 8000_Mixed | Tomato aspic                                                                                                       | 62 | 4.5 | B | 3 |
| 75141020 | 8000_Mixed | Cabbage salad or coleslaw, made with Italian dressing                                                              | 62 | 4   | B | 4 |
| 41601200 | 8000_Mixed | Liquid from stewed kidney beans, Puerto Rican style                                                                | 62 | 3.5 | B | 4 |
| 58146633 | 8000_Mixed | Pasta, whole grain, with tomato-based sauce, meat, and added vegetables, ready-to-heat                             | 61 | 4   | A | 4 |
| 27450090 | 8000_Mixed | Tuna salad with cheese                                                                                             | 61 | 3   | C | 4 |
| 58146623 | 8000_Mixed | Pasta, whole grain, with tomato-based sauce and meat, ready-to-heat                                                | 61 | 4   | A | 4 |
| 75401010 | 8000_Mixed | Asparagus, NS as to form, creamed or with cheese sauce                                                             | 61 | 4   | B | 4 |
| 58160120 | 8000_Mixed | Rice with beans and tomatoes                                                                                       | 61 | 5   | A | 4 |
| 27450250 | 8000_Mixed | Oysters Rockefeller                                                                                                | 61 | 3   | B | 4 |
| 27445250 | 8000_Mixed | Almond chicken                                                                                                     | 61 | 4   | B | 4 |
| 27445130 | 8000_Mixed | Chicken or turkey and vegetables excluding carrots, broccoli, and dark-green leafy; no potatoes, tomato-based sai  | 61 | 4.5 | B | 4 |
| 27451010 | 8000_Mixed | Fried fish with sauce, Puerto Rican style                                                                          | 61 | 3.5 | C | 4 |
| 27450070 | 8000_Mixed | Shrimp salad                                                                                                       | 61 | 3   | D | 4 |
| 58161420 | 8000_Mixed | Rice, brown, with corn, NS as to fat added in cooking                                                              | 60 | 4   | A | 4 |
| 58161424 | 8000_Mixed | Rice, brown, with corn, fat added in cooking                                                                       | 60 | 4   | A | 4 |
| 58146622 | 8000_Mixed | Pasta, whole grain, with tomato-based sauce and meat, home recipe                                                  | 60 | 4   | A | 4 |
| 27150030 | 8000_Mixed | Crab imperial                                                                                                      | 60 | 3.5 | B | 4 |
| 75141025 | 8000_Mixed | Cabbage salad or coleslaw, made with light Italian dressing                                                        | 60 | 4   | B | 4 |
| 27420400 | 8000_Mixed | Pork and vegetables including carrots, broccoli, and/or dark-green leafy; no potatoes, tomato-based sauce          | 60 | 4.5 | A | 4 |
| 75401012 | 8000_Mixed | Asparagus, from frozen, creamed or with cheese sauce                                                               | 60 | 4   | B | 4 |
| 75651150 | 8000_Mixed | Vegetable noodle soup, reduced sodium, canned, prepared with water or ready-to-serve                               | 60 | 4.5 | A | 4 |
| 27446205 | 8000_Mixed | Chicken or turkey salad with nuts and/or fruits                                                                    | 60 | 4   | B | 4 |
| 75416500 | 8000_Mixed | Pea salad                                                                                                          | 60 | 4   | C | 4 |
| 58161442 | 8000_Mixed | Rice, brown, with peas and carrots, fat not added in cooking                                                       | 60 | 4   | A | 4 |
| 75141035 | 8000_Mixed | Cabbage salad or coleslaw, made with light creamy dressing                                                         | 60 | 4   | B | 3 |
| 27415110 | 8000_Mixed | Beef and broccoli                                                                                                  | 60 | 4.5 | B | 4 |
| 75650990 | 8000_Mixed | Minestrone soup, reduced sodium, canned or ready-to-serve                                                          | 60 | 4.5 | A | 4 |
| 27420370 | 8000_Mixed | Pork, tofu, and vegetables, excluding carrots, broccoli, and dark-green leafy; no potatoes, soy-based sauce        | 60 | 4   | A | 4 |
| 27341055 | 8000_Mixed | Chicken or turkey, potatoes, and vegetables including carrots, broccoli, and/or dark-green leafy; tomato-based sai | 60 | 4.5 | B | 4 |
| 27450065 | 8000_Mixed | Tuna salad, made with light creamy dressing                                                                        | 59 | 3.5 | B | 4 |
| 27446315 | 8000_Mixed | Chicken or turkey garden salad with bacon and cheese, chicken and/or turkey, bacon, cheese, lettuce and/or gree    | 59 | 5   | A | 4 |
| 28340600 | 8000_Mixed | Chicken or turkey vegetable soup, canned, prepared with water or ready-to-serve                                    | 59 | 4.5 | B | 3 |
| 27510511 | 8000_Mixed | Hamburger, 1 miniature patty, on miniature bun, from school                                                        | 59 | 4   | A | 4 |
| 41601040 | 8000_Mixed | Lima bean soup, home recipe, canned or ready-to-serve                                                              | 59 | 4.5 | A | 4 |
| 27411100 | 8000_Mixed | Beef with vegetables including carrots, broccoli, and/or dark-green leafy; no potatoes, tomato-based sauce         | 59 | 4.5 | A | 4 |
| 27151050 | 8000_Mixed | Shrimp in garlic sauce, Puerto Rican style                                                                         | 59 | 3   | D | 4 |
| 27150250 | 8000_Mixed | Fish moomchim                                                                                                      | 59 | 0.5 | D | 4 |
| 14670000 | 8000_Mixed | Mozzarella cheese, tomato, and basil, with oil and vinegar dressing                                                | 59 | 4   | B | 4 |
| 27445120 | 8000_Mixed | Chicken or turkey and vegetables excluding carrots, broccoli, and dark-green leafy; no potatoes, soy-based sauce   | 59 | 4   | A | 4 |
| 27450660 | 8000_Mixed | Shellfish mixture and vegetables excluding carrots, broccoli, and dark-green leafy; no potatoes, mushroom sauce    | 59 | 4   | B | 4 |
| 27510150 | 8000_Mixed | Cheeseburger, 1 miniature patty, on miniature bun, from school                                                     | 58 | 4   | B | 4 |
| 27510565 | 8000_Mixed | Hamburger, on bun, from school                                                                                     | 58 | 4   | A | 4 |
| 75141000 | 8000_Mixed | Cabbage salad or coleslaw, made with coleslaw dressing                                                             | 58 | 4   | C | 4 |
| 58160110 | 8000_Mixed | Rice with beans                                                                                                    | 58 | 5   | A | 4 |
| 27415220 | 8000_Mixed | Beef, tofu, and vegetables excluding carrots, broccoli, and dark-green leafy; no potatoes, soy-based sauce         | 58 | 4   | A | 4 |
| 28355260 | 8000_Mixed | Lobster gumbo                                                                                                      | 58 | 4.5 | A | 4 |
| 72125260 | 8000_Mixed | Spinach and cheese casserole                                                                                       | 58 | 4   | B | 4 |
| 27250030 | 8000_Mixed | Codfish ball or cake                                                                                               | 58 | 4   | B | 4 |
| 28350040 | 8000_Mixed | Fish stock, home recipe                                                                                            | 58 | 3.5 | B | 4 |
| 75649010 | 8000_Mixed | Vegetable soup, canned, prepared with water or ready-to-serve                                                      | 58 | 4.5 | B | 3 |

Supplementary Table 8. Original (uncorrected) scores for all food items.

|          |            |                                                                                                                   |    |     |   |   |
|----------|------------|-------------------------------------------------------------------------------------------------------------------|----|-----|---|---|
| 75656020 | 8000_Mixed | Vegetable soup, chunky style                                                                                      | 58 | 4.5 | B | 3 |
| 58161532 | 8000_Mixed | Rice, brown, with other vegetables, fat not added in cooking                                                      | 58 | 3.5 | A | 4 |
| 72201241 | 8000_Mixed | Broccoli, cooked, from fresh, with mushroom sauce                                                                 | 57 | 4.5 | B | 4 |
| 27150010 | 8000_Mixed | Fish with cream or white sauce, not tuna or lobster                                                               | 57 | 4   | A | 4 |
| 27440110 | 8000_Mixed | Chicken or turkey and vegetables including carrots, broccoli, and/or dark-green leafy; no potatoes, no sauce      | 57 | 4   | B | 4 |
| 41601130 | 8000_Mixed | Bean soup, mixed beans, home recipe, canned or ready-to-serve                                                     | 57 | 4.5 | A | 4 |
| 41601100 | 8000_Mixed | Portuguese bean soup, home recipe, canned or ready-to-serve                                                       | 57 | 4.5 | A | 4 |
| 41601030 | 8000_Mixed | Black bean soup, home recipe, canned or ready-to-serve                                                            | 57 | 4.5 | A | 4 |
| 75651000 | 8000_Mixed | Minestrone soup, home recipe                                                                                      | 57 | 4.5 | A | 4 |
| 27330170 | 8000_Mixed | Stuffed grape leaves with lamb and rice                                                                           | 57 | 4.5 | A | 4 |
| 27341510 | 8000_Mixed | Chicken or turkey stew with potatoes and vegetables including carrots, broccoli, and/or dark-green leafy; tomato- | 57 | 4.5 | A | 4 |
| 27120160 | 8000_Mixed | Pork curry                                                                                                        | 57 | 4.5 | A | 4 |
| 27445110 | 8000_Mixed | Chicken or turkey and vegetables including carrots, broccoli, and/or dark-green leafy; no potatoes, soy-based sau | 57 | 4.5 | A | 4 |
| 75141200 | 8000_Mixed | Cabbage salad or coleslaw with pineapple, with dressing                                                           | 57 | 4   | B | 4 |
| 58401200 | 8000_Mixed | Barley soup, sweet, with or without nuts, Asian Style                                                             | 56 | 3.5 | B | 3 |
| 28340580 | 8000_Mixed | Chicken or turkey soup with vegetables, broccoli, carrots, celery, potatoes and onions, Asian style               | 56 | 4   | B | 4 |
| 58163360 | 8000_Mixed | Flavored rice, brown and wild                                                                                     | 56 | 3.5 | B | 4 |
| 27320100 | 8000_Mixed | Pork, potatoes, and vegetables including carrots, broccoli, and/or dark-green leafy; tomato-based sauce           | 56 | 4.5 | B | 4 |
| 27341060 | 8000_Mixed | Chicken or turkey, potatoes, and vegetables excluding carrots, broccoli, and dark-green leafy; tomato-based sauce | 56 | 4.5 | B | 4 |
| 75141040 | 8000_Mixed | Cabbage salad or coleslaw, made with any type of fat free dressing                                                | 56 | 4.5 | A | 3 |
| 42302160 | 8000_Mixed | Peanut butter and jelly sandwich, with reduced fat peanut butter, reduced sugar jelly, on wheat bread             | 55 | 3.5 | C | 4 |
| 42302165 | 8000_Mixed | Peanut butter and jelly sandwich, with reduced fat peanut butter, reduced sugar jelly, on whole wheat bread       | 55 | 3.5 | C | 4 |
| 75401011 | 8000_Mixed | Asparagus, from fresh, creamed or with cheese sauce                                                               | 55 | 4   | B | 4 |
| 27420500 | 8000_Mixed | Pork and vegetables including carrots, broccoli, and/or dark-green leafy; no potatoes, soy-based sauce            | 55 | 4.5 | A | 4 |
| 27341520 | 8000_Mixed | Chicken or turkey stew with potatoes and vegetables excluding carrots, broccoli, and dark-green leafy; tomato-ba  | 55 | 4.5 | A | 4 |
| 27345310 | 8000_Mixed | Chicken or turkey, rice, and vegetables including carrots, broccoli, and/or dark-green leafy; soy-based sauce     | 55 | 4   | A | 4 |
| 27550750 | 8000_Mixed | Tuna salad submarine sandwich, with lettuce and tomato                                                            | 55 | 3.5 | B | 4 |
| 27550751 | 8000_Mixed | Tuna salad submarine sandwich, with cheese, lettuce and tomato                                                    | 55 | 3.5 | B | 4 |
| 41601140 | 8000_Mixed | Bean soup, home recipe                                                                                            | 55 | 5   | A | 4 |
| 27420120 | 8000_Mixed | Pork and watercress with soy-based sauce                                                                          | 55 | 4   | B | 4 |
| 75440200 | 8000_Mixed | Vegetable tempura                                                                                                 | 55 | 4   | B | 4 |
| 27445220 | 8000_Mixed | Kung pao chicken                                                                                                  | 55 | 4   | A | 4 |
| 58165430 | 8000_Mixed | Rice, brown, with vegetables and gravy, NS as to fat added in cooking                                             | 55 | 4   | B | 4 |
| 58165450 | 8000_Mixed | Rice, brown, with vegetables and gravy, fat added in cooking                                                      | 55 | 4   | B | 4 |
| 27250410 | 8000_Mixed | Shrimp with crab stuffing                                                                                         | 55 | 3.5 | C | 4 |
| 42302110 | 8000_Mixed | Peanut butter and jelly sandwich, with regular peanut butter, reduced sugar jelly, on wheat bread                 | 55 | 3.5 | C | 4 |
| 42302115 | 8000_Mixed | Peanut butter and jelly sandwich, with regular peanut butter, reduced sugar jelly, on whole wheat bread           | 55 | 3.5 | C | 4 |
| 27260510 | 8000_Mixed | Liver dumpling                                                                                                    | 55 | 2   | D | 4 |
| 75141100 | 8000_Mixed | Cabbage salad or coleslaw with apples and/or raisins, with dressing                                               | 55 | 4   | C | 4 |
| 58160130 | 8000_Mixed | Rice with beans and chicken                                                                                       | 54 | 5   | A | 4 |
| 28355350 | 8000_Mixed | Salmon soup, cream style                                                                                          | 54 | 3.5 | B | 4 |
| 41602020 | 8000_Mixed | Garbanzo bean or chickpea soup, home recipe, canned or ready-to-serve                                             | 54 | 4.5 | A | 4 |
| 27341010 | 8000_Mixed | Chicken or turkey, potatoes, and vegetables including carrots, broccoli, and/or dark-green leafy; no sauce        | 54 | 4.5 | A | 4 |
| 74602200 | 8000_Mixed | Tomato soup, canned, reduced sodium, prepared with water, or ready-to-serve                                       | 54 | 4.5 | B | 4 |
| 27510190 | 8000_Mixed | Cheeseburger on bun, from school                                                                                  | 54 | 4   | B | 4 |
| 55702000 | 8000_Mixed | Cake or pancake made with rice flour and/or dried beans                                                           | 54 | 5   | A | 3 |
| 28143180 | 8000_Mixed | Chicken in butter sauce with potatoes and vegetable, diet frozen meal                                             | 54 | 4.5 | A | 4 |
| 58160810 | 8000_Mixed | Rice, white, with lentils, fat not added in cooking                                                               | 54 | 5   | A | 4 |
| 72201231 | 8000_Mixed | Broccoli, cooked, from fresh, with cheese sauce                                                                   | 54 | 4   | A | 4 |
| 27150160 | 8000_Mixed | Shrimp with lobster sauce                                                                                         | 54 | 2   | D | 3 |
| 27142200 | 8000_Mixed | Turkey with gravy                                                                                                 | 54 | 4   | A | 3 |
| 58302080 | 8000_Mixed | Noodles with vegetables in tomato-based sauce, diet frozen meal                                                   | 54 | 4.5 | A | 4 |
| 28340150 | 8000_Mixed | Mexican style chicken broth soup stock                                                                            | 54 | 4.5 | B | 4 |
| 58161422 | 8000_Mixed | Rice, brown, with corn, fat not added in cooking                                                                  | 54 | 4   | A | 4 |
| 27550510 | 8000_Mixed | Sardine sandwich, with lettuce and spread                                                                         | 54 | 3.5 | B | 4 |
| 27415100 | 8000_Mixed | Beef and vegetables including carrots, broccoli, and/or dark-green leafy; no potatoes, soy-based sauce            | 54 | 4.5 | A | 4 |
| 27420410 | 8000_Mixed | Pork and vegetables excluding carrots, broccoli, and dark-green leafy; no potatoes, tomato-based sauce            | 54 | 4.5 | A | 4 |
| 75647000 | 8000_Mixed | Seaweed soup                                                                                                      | 54 | 4   | C | 4 |
| 27311625 | 8000_Mixed | Beef, potatoes, and vegetables including carrots, broccoli, and/or dark-green leafy; tomato-based sauce           | 54 | 4.5 | B | 4 |
| 41602070 | 8000_Mixed | Split pea soup, canned, reduced sodium, prepared with water or ready-to-serve                                     | 53 | 4.5 | A | 4 |
| 75612010 | 8000_Mixed | Zucchini soup, cream of, prepared with milk                                                                       | 53 | 4   | B | 4 |
| 27130100 | 8000_Mixed | Lamb or mutton curry                                                                                              | 53 | 4   | B | 4 |
| 58146751 | 8000_Mixed | Pasta, whole grain, with cream sauce, seafood, and added vegetables, restaurant                                   | 53 | 3   | C | 4 |
| 58147110 | 8000_Mixed | Pasta with tomato-based sauce and beans or lentils                                                                | 53 | 5   | A | 4 |
| 75416600 | 8000_Mixed | Pea salad with cheese                                                                                             | 53 | 4   | C | 4 |
| 42302060 | 8000_Mixed | Peanut butter and jelly sandwich, with reduced fat peanut butter, regular jelly, on wheat bread                   | 53 | 3.5 | C | 4 |
| 42302065 | 8000_Mixed | Peanut butter and jelly sandwich, with reduced fat peanut butter, regular jelly, on whole wheat bread             | 53 | 3.5 | C | 4 |
| 27440120 | 8000_Mixed | Chicken or turkey and vegetables excluding carrots, broccoli, and dark-green leafy; no potatoes, no sauce         | 52 | 4   | B | 4 |
| 27420150 | 8000_Mixed | Kung Pao pork                                                                                                     | 52 | 4   | B | 4 |
| 27250080 | 8000_Mixed | Salmon loaf                                                                                                       | 52 | 3   | D | 4 |
| 58164830 | 8000_Mixed | Rice, brown, with gravy, NS as to fat added in cooking                                                            | 52 | 3.5 | B | 4 |
| 58164850 | 8000_Mixed | Rice, brown, with gravy, fat added in cooking                                                                     | 52 | 3.5 | B | 4 |
| 27250950 | 8000_Mixed | Shellfish and noodles with tomato-based sauce                                                                     | 52 | 4   | A | 4 |
| 27420110 | 8000_Mixed | Pork and vegetables, Hawaiian style                                                                               | 52 | 4.5 | A | 4 |
| 28355210 | 8000_Mixed | Crab soup, cream of, prepared with milk                                                                           | 52 | 3.5 | B | 4 |
| 75601210 | 8000_Mixed | Cabbage with meat soup, home recipe, canned or ready-to-serve                                                     | 52 | 4.5 | A | 4 |
| 27411200 | 8000_Mixed | Beef with vegetables excluding carrots, broccoli, and dark-green leafy; no potatoes, tomato-based sauce           | 52 | 4.5 | B | 4 |
| 58165460 | 8000_Mixed | Rice, brown, with vegetables, soy-based sauce, NS as to fat added in cooking                                      | 52 | 4   | B | 4 |
| 58165480 | 8000_Mixed | Rice, brown, with vegetables, soy-based sauce, fat added in cooking                                               | 52 | 4   | B | 4 |
| 27450130 | 8000_Mixed | Crab salad made with imitation crab                                                                               | 52 | 3.5 | C | 4 |
| 27441120 | 8000_Mixed | Chicken or turkey creole, without rice                                                                            | 52 | 4.5 | B | 4 |
| 27420060 | 8000_Mixed | Pork and vegetables including carrots, broccoli, and/or dark-green leafy; no potatoes, no sauce                   | 52 | 4.5 | A | 4 |
| 75651140 | 8000_Mixed | Vegetable soup with chicken broth, home recipe, Mexican style                                                     | 52 | 4.5 | B | 4 |
| 27540250 | 8000_Mixed | Chicken fillet, broiled, sandwich with cheese, on whole wheat roll, with lettuce, tomato and non-mayonnaise type  | 52 | 3.5 | B | 4 |
| 72201240 | 8000_Mixed | Broccoli, cooked, NS as to form, with mushroom sauce                                                              | 52 | 4.5 | A | 4 |
| 72201242 | 8000_Mixed | Broccoli, cooked, from frozen, with mushroom sauce                                                                | 52 | 4.5 | A | 4 |

Supplementary Table 8. Original (uncorrected) scores for all food items.

|          |            |                                                                                                                    |    |     |   |   |
|----------|------------|--------------------------------------------------------------------------------------------------------------------|----|-----|---|---|
| 28350110 | 8000_Mixed | Crab soup, NS as to tomato-base or cream style                                                                     | 52 | 3.5 | B | 4 |
| 42302020 | 8000_Mixed | Peanut butter and jelly sandwich, with regular peanut butter, regular jelly, on wheat bread                        | 52 | 3.5 | C | 4 |
| 42302025 | 8000_Mixed | Peanut butter and jelly sandwich, with regular peanut butter, regular jelly, on whole wheat bread                  | 52 | 3.5 | C | 4 |
| 27443150 | 8000_Mixed | Chicken or turkey divan                                                                                            | 52 | 4   | B | 4 |
| 27250270 | 8000_Mixed | Clams Casino                                                                                                       | 52 | 4   | A | 4 |
| 27420510 | 8000_Mixed | Pork and vegetables excluding carrots, broccoli, and dark- green leafy; no potatoes, soy-based sauce               | 52 | 4   | A | 4 |
| 75140990 | 8000_Mixed | Cabbage salad or coleslaw, from fast food / restaurant                                                             | 51 | 4   | C | 4 |
| 27250150 | 8000_Mixed | Tuna loaf                                                                                                          | 51 | 4   | B | 4 |
| 27415170 | 8000_Mixed | Kung Pao beef                                                                                                      | 51 | 4   | B | 4 |
| 27320110 | 8000_Mixed | Pork, potatoes, and vegetables excluding carrots, broccoli, and dark-green leafy; tomato-based sauce               | 51 | 4.5 | B | 4 |
| 74506000 | 8000_Mixed | Tomato and cucumber salad made with tomato, cucumber, oil, and vinegar                                             | 51 | 4   | C | 4 |
| 58160140 | 8000_Mixed | Rice with beans and pork                                                                                           | 51 | 5   | A | 4 |
| 27315270 | 8000_Mixed | Stuffed grape leaves with beef and rice                                                                            | 51 | 4.5 | B | 4 |
| 75417021 | 8000_Mixed | Peas, cooked, from fresh, with mushroom sauce                                                                      | 51 | 4.5 | A | 4 |
| 75649040 | 8000_Mixed | Vegetable soup, reduced sodium, canned, ready to serve                                                             | 51 | 4.5 | B | 3 |
| 58165440 | 8000_Mixed | Rice, brown, with vegetables and gravy, fat not added in cooking                                                   | 51 | 4   | B | 4 |
| 27420160 | 8000_Mixed | Moo Shu pork, without Chinese pancake                                                                              | 51 | 3.5 | C | 4 |
| 72308500 | 8000_Mixed | Dark-green leafy vegetable soup, meatless, Asian style                                                             | 51 | 4   | B | 4 |
| 75401013 | 8000_Mixed | Asparagus, from canned, creamed or with cheese sauce                                                               | 51 | 4   | B | 4 |
| 27448030 | 8000_Mixed | Chicken or turkey fricassee, no sauce, no potatoes, Puerto Rican style                                             | 51 | 3.5 | D | 3 |
| 27116100 | 8000_Mixed | Beef curry                                                                                                         | 51 | 4.5 | B | 4 |
| 28340660 | 8000_Mixed | Chicken or turkey vegetable soup, home recipe                                                                      | 51 | 4.5 | B | 4 |
| 28355440 | 8000_Mixed | Shrimp gumbo                                                                                                       | 51 | 4.5 | A | 4 |
| 14640040 | 8000_Mixed | Cheese sandwich, reduced fat American cheese,, on wheat bread, with mayonnaise                                     | 51 | 2   | D | 4 |
| 14640042 | 8000_Mixed | Cheese sandwich, reduced fat American cheese, on whole wheat bread, with mayonnaise                                | 51 | 2   | D | 4 |
| 28351170 | 8000_Mixed | Codfish soup with noodles, Puerto Rican style                                                                      | 51 | 4   | A | 4 |
| 75440500 | 8000_Mixed | Vegetable combinations, including carrots, broccoli, and/or dark-green leafy; cooked, with cheese sauce            | 51 | 4   | B | 4 |
| 27545110 | 8000_Mixed | Turkey or chicken burger, plain, on wheat bun                                                                      | 51 | 4   | A | 4 |
| 27250132 | 8000_Mixed | Shrimp and noodles with tomato sauce                                                                               | 51 | 4   | A | 4 |
| 27345320 | 8000_Mixed | Chicken or turkey, rice, and vegetables excluding carrots, broccoli, and dark-green leafy; soy-based sauce         | 51 | 4   | A | 4 |
| 27442110 | 8000_Mixed | Chicken or turkey and vegetables including carrots, broccoli, and/or dark-green leafy; no potatoes, gravy          | 50 | 4   | B | 4 |
| 27311630 | 8000_Mixed | Beef, potatoes, and vegetables excluding carrots, broccoli, and dark-green leafy; tomato-based sauce               | 50 | 4.5 | B | 4 |
| 27341025 | 8000_Mixed | Chicken or turkey, potatoes, and vegetables including carrots, broccoli, and/or dark-green leafy; gravy            | 50 | 4   | B | 4 |
| 58155320 | 8000_Mixed | Seafood paella, Puerto Rican style                                                                                 | 50 | 3.5 | A | 4 |
| 58146752 | 8000_Mixed | Pasta, whole grain, with cream sauce, seafood, and added vegetables, home recipe                                   | 50 | 3.5 | B | 4 |
| 73501000 | 8000_Mixed | Carrot soup, cream of, prepared with milk, home recipe, canned or ready-to-serve                                   | 50 | 4   | B | 4 |
| 27440130 | 8000_Mixed | Chicken or turkey shish kabob with vegetables, excluding potatoes                                                  | 50 | 4.5 | A | 4 |
| 27311645 | 8000_Mixed | Beef, potatoes, and vegetables including carrots, broccoli, and/or dark-green leafy; soy-based sauce               | 50 | 4.5 | A | 4 |
| 72201230 | 8000_Mixed | Broccoli, cooked, NS as to form, with cheese sauce                                                                 | 50 | 4   | A | 4 |
| 75406010 | 8000_Mixed | Brussels sprouts, NS as to form, creamed                                                                           | 50 | 4   | A | 4 |
| 58164860 | 8000_Mixed | Rice, brown, with soy-based sauce, NS as to fat added in cooking                                                   | 50 | 3   | C | 4 |
| 58164880 | 8000_Mixed | Rice, brown, with soy-based sauce, fat added in cooking                                                            | 50 | 3   | C | 4 |
| 72201232 | 8000_Mixed | Broccoli, cooked, from frozen, with cheese sauce                                                                   | 50 | 4   | A | 4 |
| 58146371 | 8000_Mixed | Pasta with tomato-based sauce, seafood, and added vegetables, restaurant                                           | 50 | 3.5 | B | 4 |
| 27415200 | 8000_Mixed | Beef and vegetables excluding carrots, broccoli, and dark-green leafy; no potatoes, soy-based sauce                | 50 | 4.5 | A | 4 |
| 27410210 | 8000_Mixed | Beef and vegetables including carrots, broccoli, and/or dark-green leafy; no potatoes, no sauce                    | 50 | 4.5 | A | 4 |
| 27545210 | 8000_Mixed | Turkey or chicken burger, with condiments, on wheat bun                                                            | 50 | 4   | B | 4 |
| 27545220 | 8000_Mixed | Turkey or chicken burger, with condiments, on whole wheat bun                                                      | 50 | 4   | B | 4 |
| 27446200 | 8000_Mixed | Chicken or turkey salad, made with mayonnaise                                                                      | 50 | 3.5 | C | 4 |
| 58106570 | 8000_Mixed | Pizza with pepperoni, from school lunch, thin crust                                                                | 50 | 3.5 | C | 4 |
| 75140500 | 8000_Mixed | Broccoli salad with cauliflower, cheese, bacon bits, and dressing                                                  | 50 | 3.5 | C | 4 |
| 28351160 | 8000_Mixed | Codfish, rice, and vegetable soup, Puerto Rican style                                                              | 50 | 4   | B | 4 |
| 27564570 | 8000_Mixed | Frankfurter or hot dog sandwich, meatless, on bread, with meatless chili                                           | 50 | 4   | A | 4 |
| 27446332 | 8000_Mixed | Chicken or turkey, breaded, fried, garden salad with cheese, chicken and/or turkey, cheese, lettuce and/or greens  | 50 | 4.5 | A | 4 |
| 27540230 | 8000_Mixed | Chicken patty sandwich with cheese, on wheat bun, with lettuce, tomato and spread                                  | 50 | 3.5 | C | 4 |
| 58146361 | 8000_Mixed | Pasta with tomato-based sauce and seafood, restaurant                                                              | 50 | 3.5 | B | 4 |
| 75406012 | 8000_Mixed | Brussels sprouts, from frozen, creamed                                                                             | 50 | 4   | A | 4 |
| 72201250 | 8000_Mixed | Broccoli, cooked, NS as to form, with cream sauce                                                                  | 50 | 4.5 | A | 4 |
| 27341035 | 8000_Mixed | Chicken or turkey, potatoes, and vegetables including carrots, broccoli, and/or dark-green leafy; cream sauce, whi | 49 | 4   | B | 4 |
| 27564430 | 8000_Mixed | Frankfurter or hot dog sandwich, meatless, plain, on bread                                                         | 49 | 4   | A | 4 |
| 28315050 | 8000_Mixed | Beef vegetable soup with potato, pasta, or rice, chunky style, canned, or ready-to-serve                           | 49 | 4.5 | B | 3 |
| 27341020 | 8000_Mixed | Chicken or turkey, potatoes, and vegetables excluding carrots, broccoli, and dark-green leafy; no sauce            | 49 | 4.5 | A | 4 |
| 28355250 | 8000_Mixed | Lobster bisque                                                                                                     | 49 | 3.5 | B | 4 |
| 75450500 | 8000_Mixed | Vegetable combination, including carrots, broccoli, and/or dark-green leafy; cooked, with cream sauce              | 49 | 4   | B | 4 |
| 27350050 | 8000_Mixed | Shrimp chow mein or chop suey with noodles                                                                         | 49 | 4   | A | 4 |
| 58164840 | 8000_Mixed | Rice, brown, with gravy, fat not added in cooking                                                                  | 49 | 3.5 | B | 4 |
| 75142550 | 8000_Mixed | Cucumber salad, made with Italian dressing                                                                         | 49 | 4   | C | 4 |
| 27416150 | 8000_Mixed | Pepper steak                                                                                                       | 49 | 4.5 | B | 4 |
| 27464000 | 8000_Mixed | Gumbo, no rice                                                                                                     | 49 | 4   | A | 4 |
| 27150510 | 8000_Mixed | Scallops with cheese sauce                                                                                         | 49 | 3.5 | C | 3 |
| 58146753 | 8000_Mixed | Pasta, whole grain, with cream sauce, seafood, and added vegetables, ready-to-heat                                 | 49 | 3.5 | B | 4 |
| 28350050 | 8000_Mixed | Fish chowder                                                                                                       | 49 | 4   | A | 4 |
| 75412070 | 8000_Mixed | Eggplant with cheese and tomato sauce                                                                              | 49 | 4   | B | 4 |
| 27320320 | 8000_Mixed | Pork, rice, and vegetables including carrots, broccoli, and/or dark-green leafy; soy-based sauce                   | 49 | 4.5 | A | 4 |
| 27336200 | 8000_Mixed | Venison or deer, potatoes, and vegetables including carrots, broccoli, and/or dark-green leafy; gravy              | 49 | 4.5 | B | 4 |
| 27446220 | 8000_Mixed | Chicken or turkey salad with egg                                                                                   | 49 | 3.5 | C | 4 |
| 27341310 | 8000_Mixed | Chicken or turkey stew with potatoes and vegetables including carrots, broccoli, and/or dark-green leafy; gravy    | 49 | 4.5 | A | 4 |
| 27348100 | 8000_Mixed | Chicken fricassee, Puerto Rican style                                                                              | 49 | 4   | C | 4 |
| 14640028 | 8000_Mixed | Cheese sandwich, American cheese, on wheat bread, with mayonnaise                                                  | 48 | 1.5 | D | 4 |
| 14640030 | 8000_Mixed | Cheese sandwich, American cheese, on whole wheat bread, with mayonnaise                                            | 48 | 1.5 | D | 4 |
| 58160135 | 8000_Mixed | Rice with beans and beef                                                                                           | 48 | 5   | A | 4 |
| 72201251 | 8000_Mixed | Broccoli, cooked, from fresh, with cream sauce                                                                     | 48 | 3.5 | B | 4 |
| 27460010 | 8000_Mixed | Chow mein or chop suey, NS as to type of meat, no noodles                                                          | 48 | 4.5 | A | 4 |
| 58134630 | 8000_Mixed | Tortellini, cheese-filled, meatless, with vegetables and vinaigrette dressing                                      | 48 | 3.5 | B | 4 |
| 27136100 | 8000_Mixed | Chili con carne with venison/deer and beans                                                                        | 48 | 5   | A | 4 |
| 32105200 | 8000_Mixed | Egg foo yung, NFS                                                                                                  | 48 | 4   | B | 4 |

Supplementary Table 8. Original (uncorrected) scores for all food items.

|          |            |                                                                                                                     |    |     |   |   |
|----------|------------|---------------------------------------------------------------------------------------------------------------------|----|-----|---|---|
| 58146741 | 8000_Mixed | Pasta, whole grain, with cream sauce and seafood, restaurant                                                        | 48 | 3.5 | C | 4 |
| 27446362 | 8000_Mixed | Chicken or turkey, breaded, fried, caesar garden salad, chicken and/or turkey, lettuce, tomatoes, cheese, no dress  | 48 | 4.5 | A | 4 |
| 27250450 | 8000_Mixed | Shrimp toast, fried                                                                                                 | 48 | 3   | C | 4 |
| 32105230 | 8000_Mixed | Shrimp egg foo yung                                                                                                 | 48 | 4   | B | 4 |
| 27311650 | 8000_Mixed | Beef, potatoes, and vegetables excluding carrots, broccoli, and dark-green leafy; soy-based sauce                   | 48 | 4.5 | A | 4 |
| 77250710 | 8000_Mixed | Tannier fritters, Puerto Rican style                                                                                | 48 | 4.5 | A | 4 |
| 58109140 | 8000_Mixed | Pizza, cheese and vegetables, gluten-free thin crust                                                                | 48 | 3   | B | 4 |
| 27460100 | 8000_Mixed | Lau lau                                                                                                             | 48 | 4   | B | 3 |
| 27446100 | 8000_Mixed | Chicken or turkey chow mein or chop suey, no noodles                                                                | 48 | 4.5 | A | 4 |
| 27320450 | 8000_Mixed | Ham, potatoes, and vegetables including carrots, broccoli, and/or dark-green leafy; no sauce                        | 48 | 4   | B | 4 |
| 14640046 | 8000_Mixed | Cheese sandwich, reduced fat Cheddar cheese, on wheat bread, with mayonnaise                                        | 48 | 2   | D | 4 |
| 14640048 | 8000_Mixed | Cheese sandwich, reduced fat Cheddar cheese, on whole wheat bread, with mayonnaise                                  | 48 | 2   | D | 4 |
| 27362000 | 8000_Mixed | Stewed tripe, with potatoes, Puerto Rican style                                                                     | 48 | 4.5 | B | 4 |
| 41601090 | 8000_Mixed | Bean soup, with macaroni, home recipe, canned, or ready-to-serve                                                    | 48 | 4.5 | A | 4 |
| 75656040 | 8000_Mixed | Vegetable soup, with pasta, chunky style                                                                            | 48 | 4.5 | A | 4 |
| 28141610 | 8000_Mixed | Chicken and vegetables in cream or white sauce, diet frozen meal                                                    | 48 | 4   | A | 4 |
| 28145110 | 8000_Mixed | Turkey with vegetable, stuffing, diet frozen meal                                                                   | 48 | 4.5 | A | 4 |
| 27446240 | 8000_Mixed | Chicken or turkey salad, made with creamy dressing                                                                  | 48 | 3   | C | 4 |
| 58106578 | 8000_Mixed | Pizza, with pepperoni, from school lunch, medium crust                                                              | 48 | 3.5 | C | 4 |
| 75651070 | 8000_Mixed | Vegetable rice soup, canned, prepared with water or ready-to-serve                                                  | 48 | 4.5 | A | 4 |
| 27320040 | 8000_Mixed | Pork, potatoes, and vegetables including carrots, broccoli, and/or dark-green leafy; no sauce                       | 48 | 4.5 | A | 4 |
| 27250300 | 8000_Mixed | Mackerel cake or patty                                                                                              | 47 | 3.5 | C | 4 |
| 27416250 | 8000_Mixed | Beef salad                                                                                                          | 47 | 3.5 | C | 4 |
| 41602090 | 8000_Mixed | Split pea and ham soup, canned, reduced sodium, prepared with water or ready-to-serve                               | 47 | 4.5 | A | 4 |
| 58109100 | 8000_Mixed | Pizza, cheese, gluten-free thin crust                                                                               | 47 | 3   | C | 4 |
| 27250020 | 8000_Mixed | Clams, stuffed                                                                                                      | 47 | 3.5 | C | 4 |
| 27341320 | 8000_Mixed | Chicken or turkey stew with potatoes and vegetables excluding carrots, broccoli, and dark-green leafy; gravy        | 47 | 5   | A | 4 |
| 27241000 | 8000_Mixed | Chicken or turkey hash                                                                                              | 47 | 5   | A | 4 |
| 27111400 | 8000_Mixed | Chili con carne, NS as to beans                                                                                     | 47 | 4.5 | A | 4 |
| 77272010 | 8000_Mixed | Puerto Rican pasteles                                                                                               | 47 | 4   | C | 4 |
| 27341030 | 8000_Mixed | Chicken or turkey, potatoes, and vegetables excluding carrots, broccoli, and dark-green leafy; gravy                | 47 | 4   | B | 4 |
| 27315510 | 8000_Mixed | Beef, rice, and vegetables including carrots, broccoli, and/or dark-green leafy; soy-based sauce                    | 47 | 4.5 | A | 4 |
| 27420170 | 8000_Mixed | Pork and onions with soy-based sauce                                                                                | 47 | 4.5 | A | 4 |
| 75414011 | 8000_Mixed | Mushrooms, from fresh, creamed                                                                                      | 47 | 4   | B | 4 |
| 75414012 | 8000_Mixed | Mushrooms, from frozen, creamed                                                                                     | 47 | 4   | B | 4 |
| 75144100 | 8000_Mixed | Lettuce, wilted, with bacon dressing                                                                                | 47 | 4   | B | 4 |
| 28345170 | 8000_Mixed | Duck soup                                                                                                           | 47 | 4   | A | 4 |
| 75406011 | 8000_Mixed | Brussels sprouts, from fresh, creamed                                                                               | 47 | 4   | B | 4 |
| 58101820 | 8000_Mixed | Mexican casserole made with ground beef, beans, tomato sauce, cheese, taco seasonings, and corn chips               | 47 | 4   | B | 4 |
| 58100725 | 8000_Mixed | Enchilada with beans, green-chile or enchilada sauce                                                                | 47 | 4.5 | A | 4 |
| 75145000 | 8000_Mixed | Seven-layer salad, lettuce salad made with a combination of onion, celery, green pepper, peas, mayonnaise, chee     | 47 | 4   | C | 4 |
| 27111406 | 8000_Mixed | Chili con carne with beans, home recipe                                                                             | 47 | 4.5 | A | 4 |
| 58151440 | 8000_Mixed | Sushi, topped with tuna                                                                                             | 46 | 4   | A | 3 |
| 27550110 | 8000_Mixed | Crab cake sandwich, on bun                                                                                          | 46 | 3.5 | B | 4 |
| 58148140 | 8000_Mixed | Macaroni or pasta salad with crab meat                                                                              | 46 | 3.5 | B | 4 |
| 77316600 | 8000_Mixed | Eggplant and meat casserole                                                                                         | 46 | 4.5 | A | 4 |
| 58106236 | 8000_Mixed | Pizza, cheese, from school lunch, thick crust                                                                       | 46 | 3.5 | C | 4 |
| 27450510 | 8000_Mixed | Tuna casserole with vegetables and mushroom sauce, no noodles                                                       | 46 | 3.5 | B | 4 |
| 28153010 | 8000_Mixed | Shrimp and clams in tomato-based sauce, with noodles, frozen meal                                                   | 46 | 4   | B | 4 |
| 75412060 | 8000_Mixed | Eggplant parmesan casserole, regular                                                                                | 46 | 4   | B | 4 |
| 27150020 | 8000_Mixed | Crab, deviled                                                                                                       | 46 | 3   | D | 4 |
| 58117510 | 8000_Mixed | Hayacas, Puerto Rican style                                                                                         | 46 | 4.5 | A | 4 |
| 27313150 | 8000_Mixed | Beef, noodles, and vegetables including carrots, broccoli, and/or dark-green leafy; soy-based sauce                 | 46 | 4.5 | A | 4 |
| 58146731 | 8000_Mixed | Pasta, whole grain, with cream sauce, poultry, and added vegetables, restaurant                                     | 46 | 3   | C | 4 |
| 28340670 | 8000_Mixed | Chicken or turkey vegetable soup with rice, home recipe, Mexican style                                              | 46 | 4.5 | A | 4 |
| 58146373 | 8000_Mixed | Pasta with tomato-based sauce, seafood, and added vegetables, ready-to-heat                                         | 46 | 4   | A | 4 |
| 58148130 | 8000_Mixed | Macaroni or pasta salad with tuna                                                                                   | 46 | 3.5 | B | 4 |
| 28355130 | 8000_Mixed | Clam chowder, New England, prepared with water                                                                      | 46 | 4   | B | 4 |
| 27311110 | 8000_Mixed | Beef, potatoes, and vegetables including carrots, broccoli, and/or dark-green leafy; no sauce                       | 46 | 4.5 | A | 4 |
| 27320140 | 8000_Mixed | Pork, potatoes, and vegetables including carrots, broccoli, and/or dark-green leafy; gravy                          | 46 | 4.5 | B | 4 |
| 58146363 | 8000_Mixed | Pasta with tomato-based sauce and seafood, ready-to-heat                                                            | 46 | 4   | A | 4 |
| 27341040 | 8000_Mixed | Chicken or turkey, potatoes, and vegetables excluding carrots, broccoli, and dark-green leafy; cream sauce, white   | 46 | 4.5 | B | 4 |
| 27336250 | 8000_Mixed | Venison or deer, potatoes, and vegetables excluding carrots, broccoli, and dark-green leafy; gravy                  | 46 | 4.5 | B | 4 |
| 27246300 | 8000_Mixed | Chicken or turkey cake, patty, or croquette                                                                         | 46 | 3.5 | D | 4 |
| 27311600 | 8000_Mixed | Beef, potatoes, and vegetables including carrots, broccoli, and/or dark-green leafy; gravy                          | 46 | 4.5 | B | 4 |
| 27564390 | 8000_Mixed | Frankfurter or hot dog sandwich, fat free, plain, on whole wheat bread                                              | 46 | 3.5 | B | 4 |
| 27564362 | 8000_Mixed | Frankfurter or hot dog sandwich, fat free, plain, on whole wheat bun                                                | 45 | 3.5 | B | 4 |
| 58146221 | 8000_Mixed | Pasta with tomato-based sauce, restaurant                                                                           | 45 | 4   | B | 4 |
| 58146301 | 8000_Mixed | Pasta with tomato-based sauce, and added vegetables, restaurant                                                     | 45 | 4   | B | 4 |
| 27335500 | 8000_Mixed | Stewed rabbit, Puerto Rican style,                                                                                  | 45 | 4.5 | B | 4 |
| 41601020 | 8000_Mixed | Bean with bacon or ham soup, canned or ready-to-serve                                                               | 45 | 4.5 | A | 4 |
| 58134310 | 8000_Mixed | Stuffed shells, with fish and/or shellfish, with tomato sauce                                                       | 45 | 4   | A | 4 |
| 77205110 | 8000_Mixed | Ripe plantain fritters, Puerto Rican style                                                                          | 45 | 3.5 | D | 4 |
| 58106634 | 8000_Mixed | Pizza, with meat other than pepperoni, from school lunch, medium crust                                              | 45 | 3.5 | C | 4 |
| 58130810 | 8000_Mixed | Lasagna, meatless, whole wheat noodles                                                                              | 45 | 3.5 | C | 4 |
| 27141000 | 8000_Mixed | Chicken or turkey cacciatore                                                                                        | 45 | 4.5 | B | 4 |
| 28311030 | 8000_Mixed | Menudo soup, canned, prepared with water or ready-to-serve                                                          | 45 | 3.5 | B | 4 |
| 27320330 | 8000_Mixed | Pork, rice, and vegetables excluding carrots, broccoli, and dark-green leafy; soy-based sauce                       | 45 | 4.5 | A | 4 |
| 72201252 | 8000_Mixed | Broccoli, cooked, from frozen, with cream sauce                                                                     | 45 | 4   | A | 4 |
| 58128210 | 8000_Mixed | Dressing with oysters                                                                                               | 45 | 3   | C | 4 |
| 58146742 | 8000_Mixed | Pasta, whole grain, with cream sauce and seafood, home recipe                                                       | 45 | 3.5 | B | 4 |
| 41601010 | 8000_Mixed | Bean soup, NFS                                                                                                      | 45 | 4.5 | A | 4 |
| 27463000 | 8000_Mixed | Stewed gizzards, Puerto Rican style                                                                                 | 45 | 4.5 | B | 4 |
| 27311610 | 8000_Mixed | Beef, potatoes, and vegetables including carrots, broccoli, and/or dark-green leafy; cream sauce, white sauce, or r | 45 | 4.5 | B | 4 |
| 75651010 | 8000_Mixed | Minestrone soup, canned, prepared with water, or ready-to-serve                                                     | 45 | 4.5 | B | 4 |
| 75652010 | 8000_Mixed | Vegetable beef soup, home recipe                                                                                    | 45 | 4.5 | A | 4 |

Supplementary Table 8. Original (uncorrected) scores for all food items.

|          |            |                                                                                                                   |    |     |   |   |
|----------|------------|-------------------------------------------------------------------------------------------------------------------|----|-----|---|---|
| 58106234 | 8000_Mixed | Pizza, cheese, from school lunch, medium crust                                                                    | 45 | 3.5 | C | 4 |
| 58106635 | 8000_Mixed | Pizza, with meat other than pepperoni, from school lunch, thin crust                                              | 45 | 3.5 | C | 4 |
| 27550730 | 8000_Mixed | Tuna melt sandwich                                                                                                | 45 | 3   | C | 4 |
| 27121410 | 8000_Mixed | Chili con carne with beans, made with pork                                                                        | 45 | 4.5 | A | 4 |
| 28350220 | 8000_Mixed | Clam chowder, Manhattan                                                                                           | 45 | 4   | B | 4 |
| 75402021 | 8000_Mixed | Beans, lima, immature, cooked, from fresh, with mushroom sauce                                                    | 45 | 4.5 | A | 4 |
| 63415100 | 8000_Mixed | Soup, fruit                                                                                                       | 45 | 4   | B | 3 |
| 74606020 | 8000_Mixed | Tomato vegetable soup with noodles, prepared with water                                                           | 45 | 4   | C | 4 |
| 58421020 | 8000_Mixed | Sopa de Fideo Aguada, Mexican style noodle soup, home recipe                                                      | 45 | 4.5 | A | 4 |
| 27540260 | 8000_Mixed | Chicken fillet, broiled, sandwich, on oat bran bun, with lettuce, tomato, spread                                  | 45 | 4   | B | 4 |
| 27250050 | 8000_Mixed | Fish cake or patty, NS as to fish                                                                                 | 45 | 4   | B | 4 |
| 27250310 | 8000_Mixed | Haddock cake or patty                                                                                             | 45 | 4   | B | 4 |
| 27150050 | 8000_Mixed | Fish timbale or mousse                                                                                            | 45 | 3   | C | 3 |
| 27415150 | 8000_Mixed | Beef chow mein or chop suey, no noodles                                                                           | 44 | 5   | A | 4 |
| 73102251 | 8000_Mixed | Carrots, cooked, from fresh, with cheese sauce                                                                    | 44 | 4   | B | 4 |
| 14620310 | 8000_Mixed | Topping from vegetable pizza                                                                                      | 44 | 3.5 | D | 4 |
| 58150100 | 8000_Mixed | Bibimbap, Korean                                                                                                  | 44 | 4.5 | B | 4 |
| 27415130 | 8000_Mixed | Szechuan beef                                                                                                     | 44 | 4.5 | A | 4 |
| 27415140 | 8000_Mixed | Hunan beef                                                                                                        | 44 | 4.5 | A | 4 |
| 27448020 | 8000_Mixed | Chicken or turkey fricassee, with sauce, no potatoes, potatoes reported separately, Puerto Rican style            | 44 | 3.5 | C | 4 |
| 77316010 | 8000_Mixed | Stuffed cabbage, with meat, Puerto Rican style                                                                    | 44 | 4   | C | 4 |
| 27343510 | 8000_Mixed | Chicken or turkey, noodles, and vegetables including carrots, broccoli, and/or dark-green leafy; tomato-based sau | 44 | 4   | A | 4 |
| 58155910 | 8000_Mixed | Rice with squid, Puerto Rican style                                                                               | 44 | 3   | C | 4 |
| 27320210 | 8000_Mixed | Pork, potatoes, and vegetables excluding carrots, broccoli, and dark-green leafy; no sauce                        | 44 | 4.5 | A | 4 |
| 58106580 | 8000_Mixed | Pizza with pepperoni, from school lunch, thick crust                                                              | 44 | 3.5 | C | 4 |
| 58165470 | 8000_Mixed | Rice, brown, with vegetables, soy-based sauce, fat not added in cooking                                           | 44 | 4   | B | 4 |
| 58148160 | 8000_Mixed | Macaroni or pasta salad with tuna and egg                                                                         | 44 | 3.5 | B | 4 |
| 75651040 | 8000_Mixed | Vegetable noodle soup, canned, prepared with water, or ready-to-serve                                             | 44 | 4   | B | 4 |
| 75654010 | 8000_Mixed | Vegetarian vegetable soup, prepared with water                                                                    | 44 | 4   | B | 4 |
| 27246505 | 8000_Mixed | Meat loaf made with chicken or turkey, with tomato-based sauce                                                    | 44 | 3.5 | B | 4 |
| 27336100 | 8000_Mixed | Venison or deer stew with potatoes and vegetables including carrots, broccoli, and/or dark-green leafy; tomato-b  | 44 | 5   | A | 4 |
| 58146351 | 8000_Mixed | Pasta with tomato-based sauce, poultry, and added vegetables, restaurant                                          | 44 | 4   | B | 4 |
| 73102252 | 8000_Mixed | Carrots, cooked, from frozen, with cheese sauce                                                                   | 44 | 4   | B | 4 |
| 27241010 | 8000_Mixed | Chicken or turkey and potatoes with gravy                                                                         | 44 | 4   | B | 4 |
| 73102250 | 8000_Mixed | Carrots, cooked, NS as to form, with cheese sauce                                                                 | 44 | 4   | B | 4 |
| 27243600 | 8000_Mixed | Chicken or turkey and rice with soy-based sauce                                                                   | 44 | 3.5 | B | 4 |
| 58106235 | 8000_Mixed | Pizza, cheese, from school lunch, thin crust                                                                      | 44 | 3.5 | C | 4 |
| 58146341 | 8000_Mixed | Pasta with tomato-based sauce and poultry, restaurant                                                             | 44 | 3.5 | B | 4 |
| 27420350 | 8000_Mixed | Pork and vegetables excluding carrots, broccoli, and dark-green leafy; no potatoes, no sauce                      | 44 | 4.5 | A | 4 |
| 28320300 | 8000_Mixed | Pork with vegetable excluding carrots, broccoli and/or dark-green leafy; soup, Asian Style                        | 44 | 4.5 | B | 4 |
| 75141005 | 8000_Mixed | Cabbage salad or coleslaw, made with light coleslaw dressing                                                      | 44 | 4   | C | 4 |
| 27350060 | 8000_Mixed | Shrimp creole, with rice                                                                                          | 44 | 3.5 | A | 4 |
| 27360100 | 8000_Mixed | Brunswick stew                                                                                                    | 44 | 4.5 | A | 4 |
| 27418210 | 8000_Mixed | Beef stew with vegetables excluding potatoes, Puerto Rican style                                                  | 44 | 4.5 | C | 4 |
| 27564560 | 8000_Mixed | Frankfurter or hot dog sandwich, meatless, on bun, with meatless chili                                            | 44 | 4   | A | 4 |
| 75410500 | 8000_Mixed | Chiles rellenos, cheese-filled                                                                                    | 44 | 3.5 | C | 4 |
| 75417022 | 8000_Mixed | Peas, cooked, from frozen, with mushroom sauce                                                                    | 44 | 4.5 | A | 4 |
| 58162120 | 8000_Mixed | Stuffed pepper, with rice, meatless                                                                               | 44 | 4   | C | 4 |
| 58146743 | 8000_Mixed | Pasta, whole grain, with cream sauce and seafood, ready-to-heat                                                   | 44 | 3   | C | 4 |
| 75417020 | 8000_Mixed | Peas, cooked, NS as to form, with mushroom sauce                                                                  | 44 | 4.5 | A | 4 |
| 27220080 | 8000_Mixed | Ham croquette                                                                                                     | 43 | 1.5 | D | 3 |
| 27336150 | 8000_Mixed | Venison or deer stew with potatoes and vegetables excluding carrots, broccoli, and dark-green leafy; tomato-base  | 43 | 5   | A | 4 |
| 27460510 | 8000_Mixed | Antipasto with ham, fish, cheese, vegetables                                                                      | 43 | 3.5 | D | 4 |
| 58146691 | 8000_Mixed | Pasta, whole grain, with cream sauce, and added vegetables, restaurant                                            | 43 | 3.5 | C | 4 |
| 75649150 | 8000_Mixed | Vegetable noodle soup, home recipe                                                                                | 43 | 4.5 | B | 4 |
| 58146733 | 8000_Mixed | Pasta, whole grain, with cream sauce, poultry, and added vegetables, ready-to-heat                                | 43 | 3.5 | B | 4 |
| 27442120 | 8000_Mixed | Chicken or turkey and vegetables excluding carrots, broccoli, and dark-green leafy; no potatoes, gravy            | 43 | 4   | B | 4 |
| 58106636 | 8000_Mixed | Pizza, with meat other than pepperoni, from school lunch, thick crust                                             | 43 | 3.5 | C | 4 |
| 27242500 | 8000_Mixed | Chicken or turkey and noodles with soy-based sauce                                                                | 43 | 3.5 | B | 4 |
| 27315520 | 8000_Mixed | Beef, rice, and vegetables excluding carrots, broccoli, and dark-green leafy; soy-based sauce                     | 43 | 4.5 | A | 4 |
| 58110200 | 8000_Mixed | Roll with meat and/or shrimp, vegetables and rice paper, not fried                                                | 43 | 4.5 | B | 4 |
| 28310170 | 8000_Mixed | Beef broth, without tomato, home recipe                                                                           | 43 | 3.5 | B | 4 |
| 27564330 | 8000_Mixed | Frankfurter or hot dog sandwich, reduced fat or light, plain, on whole wheat bread                                | 43 | 3.5 | B | 4 |
| 27446230 | 8000_Mixed | Chicken or turkey salad, made with mayonnaise-type salad dressing                                                 | 43 | 3.5 | B | 4 |
| 58146732 | 8000_Mixed | Pasta, whole grain, with cream sauce, poultry, and added vegetables, home recipe                                  | 43 | 3.5 | A | 4 |
| 58151420 | 8000_Mixed | Sushi, topped with salmon                                                                                         | 43 | 3.5 | A | 4 |
| 27120150 | 8000_Mixed | Pork or ham with soy-based sauce                                                                                  | 43 | 3.5 | B | 4 |
| 27250120 | 8000_Mixed | Shrimp and noodles, no sauce                                                                                      | 43 | 4   | A | 4 |
| 58160160 | 8000_Mixed | Hopping John                                                                                                      | 43 | 5   | A | 4 |
| 58146711 | 8000_Mixed | Pasta, whole grain, with cream sauce, meat, and added vegetables, restaurant                                      | 43 | 3   | C | 4 |
| 27564400 | 8000_Mixed | Frankfurter or hot dog sandwich, fat free, plain, on whole grain white bread                                      | 43 | 3.5 | B | 4 |
| 73111031 | 8000_Mixed | Peas and carrots, from fresh, creamed                                                                             | 43 | 4   | B | 4 |
| 58146362 | 8000_Mixed | Pasta with tomato-based sauce and seafood, home recipe                                                            | 43 | 4   | A | 4 |
| 14640034 | 8000_Mixed | Cheese sandwich, Cheddar cheese, on wheat bread, with mayonnaise                                                  | 43 | 1.5 | D | 4 |
| 14640036 | 8000_Mixed | Cheese sandwich, Cheddar cheese, on whole wheat bread, with mayonnaise                                            | 43 | 1.5 | D | 4 |
| 14620300 | 8000_Mixed | Topping from cheese pizza                                                                                         | 43 | 2   | D | 4 |
| 27145000 | 8000_Mixed | Chicken or turkey with teriyaki                                                                                   | 43 | 3.5 | D | 3 |
| 58109150 | 8000_Mixed | Pizza, cheese and vegetables, gluten-free thick crust                                                             | 43 | 3   | B | 4 |
| 27363000 | 8000_Mixed | Gumbo with rice                                                                                                   | 43 | 4   | A | 4 |
| 58403060 | 8000_Mixed | Chicken or turkey noodle soup, reduced sodium, canned or ready-to-serve                                           | 43 | 3.5 | A | 4 |
| 58127110 | 8000_Mixed | Vegetables in pastry                                                                                              | 43 | 3.5 | B | 4 |
| 77563010 | 8000_Mixed | Puerto Rican stew                                                                                                 | 43 | 4.5 | A | 4 |
| 27150170 | 8000_Mixed | Sweet and sour shrimp                                                                                             | 42 | 3   | C | 4 |
| 27446225 | 8000_Mixed | Chicken or turkey salad, made with light mayonnaise                                                               | 42 | 3.5 | B | 4 |
| 27446235 | 8000_Mixed | Chicken or turkey salad, made with light mayonnaise-type salad dressing                                           | 42 | 3.5 | B | 4 |
| 27564420 | 8000_Mixed | Frankfurter or hot dog sandwich, meatless, plain, on bun                                                          | 42 | 4   | B | 4 |

Supplementary Table 8. Original (uncorrected) scores for all food items.

|          |            |                                                                                                                    |    |     |   |   |
|----------|------------|--------------------------------------------------------------------------------------------------------------------|----|-----|---|---|
| 27336300 | 8000_Mixed | Venison or deer, noodles, and vegetables including carrots, broccoli, and/or dark-green leafy; tomato-based sauce  | 42 | 4   | A | 4 |
| 42301015 | 8000_Mixed | Peanut butter sandwich, with regular peanut butter, on white bread                                                 | 42 | 3.5 | D | 4 |
| 77230510 | 8000_Mixed | Cassava fritter stuffed with crab meat, Puerto Rican style                                                         | 42 | 3.5 | D | 4 |
| 42301010 | 8000_Mixed | Peanut butter sandwich, NFS                                                                                        | 42 | 3.5 | D | 4 |
| 27320150 | 8000_Mixed | Pork, potatoes, and vegetables excluding carrots, broccoli, and dark-green leafy; gravy                            | 42 | 4.5 | B | 4 |
| 27420250 | 8000_Mixed | Ham and vegetables including carrots broccoli, and/or dark- green leafy; no potatoes, no sauce                     | 42 | 3.5 | C | 4 |
| 27564302 | 8000_Mixed | Frankfurter or hot dog sandwich, reduced fat or light, plain, on whole wheat bun                                   | 42 | 3.5 | B | 4 |
| 42301115 | 8000_Mixed | Peanut butter sandwich, with reduced fat peanut butter, on white bread                                             | 42 | 3.5 | C | 4 |
| 75141300 | 8000_Mixed | Cabbage, Chinese, salad, with dressing                                                                             | 42 | 3.5 | C | 4 |
| 27146160 | 8000_Mixed | Chicken with mole sauce                                                                                            | 42 | 4   | B | 4 |
| 27313160 | 8000_Mixed | Beef, noodles, and vegetables excluding carrots, broccoli, and dark-green leafy; soy-based sauce                   | 42 | 4.5 | A | 4 |
| 27311120 | 8000_Mixed | Beef, potatoes, and vegetables, excluding carrots, broccoli, and dark-green leafy; no sauce                        | 42 | 4.5 | A | 4 |
| 27414100 | 8000_Mixed | Beef with vegetables including carrots, broccoli, and/or dark-green leafy; no potatoes, mushroom sauce             | 42 | 3.5 | B | 4 |
| 27410220 | 8000_Mixed | Beef and vegetables excluding carrots, broccoli, and dark-green leafy; no potatoes, no sauce                       | 42 | 4.5 | A | 4 |
| 75460700 | 8000_Mixed | Vegetable combinations, including carrots, broccoli, and/or dark-green leafy; cooked, with pasta                   | 42 | 4.5 | A | 4 |
| 27142000 | 8000_Mixed | Chicken with gravy                                                                                                 | 42 | 4   | B | 3 |
| 75417011 | 8000_Mixed | Peas, from fresh, creamed                                                                                          | 42 | 4   | A | 4 |
| 58109110 | 8000_Mixed | Pizza, cheese, gluten-free thick crust                                                                             | 42 | 3   | C | 4 |
| 72116230 | 8000_Mixed | Escarole, creamed                                                                                                  | 42 | 4   | B | 4 |
| 27343520 | 8000_Mixed | Chicken or turkey, noodles, and vegetables excluding carrots, broccoli, and dark-green leafy; tomato-based sauce   | 42 | 4   | B | 4 |
| 27416450 | 8000_Mixed | Beef and vegetables including carrots, broccoli, and/or dark-green leafy; no potatoes, gravy                       | 42 | 4   | A | 4 |
| 28143150 | 8000_Mixed | Chicken and vegetable entree with noodles, diet frozen meal                                                        | 42 | 4.5 | A | 4 |
| 27311620 | 8000_Mixed | Beef, potatoes, and vegetables excluding carrots, broccoli, and dark-green leafy; cream sauce, white sauce, or mu  | 42 | 4.5 | B | 4 |
| 27446320 | 8000_Mixed | Chicken or turkey, breaded, fried, garden salad with bacon and cheese, chicken and/or turkey, bacon, cheese, lett  | 42 | 4.5 | A | 4 |
| 75403010 | 8000_Mixed | Beans, string, green, NS as to form, creamed or with cheese sauce                                                  | 42 | 4   | B | 4 |
| 27250810 | 8000_Mixed | Fish and rice with tomato-based sauce                                                                              | 42 | 3.5 | B | 4 |
| 27246500 | 8000_Mixed | Meat loaf made with chicken or turkey                                                                              | 42 | 3.5 | C | 4 |
| 75403012 | 8000_Mixed | Beans, string, green, from frozen, creamed or with cheese sauce                                                    | 42 | 4   | B | 4 |
| 28315140 | 8000_Mixed | Beef vegetable soup, home recipe, Mexican style                                                                    | 42 | 4.5 | A | 4 |
| 28320160 | 8000_Mixed | Pork vegetable soup with potato, pasta, or rice, stew type, chunky style                                           | 42 | 4.5 | A | 4 |
| 58165400 | 8000_Mixed | Rice, brown, with vegetables, cheese and/or cream based sauce, NS as to fat added in cooking                       | 42 | 3.5 | B | 4 |
| 58165420 | 8000_Mixed | Rice, brown, with vegetables, cheese and/or cream based sauce, fat added in cooking                                | 42 | 3.5 | B | 4 |
| 58146721 | 8000_Mixed | Pasta, whole grain, with cream sauce and poultry, restaurant                                                       | 42 | 3.5 | C | 4 |
| 58162140 | 8000_Mixed | Stuffed tomato, with rice, meatless                                                                                | 41 | 4.5 | B | 4 |
| 71931010 | 8000_Mixed | Cassava with creole sauce, Puerto Rican style                                                                      | 41 | 4   | B | 4 |
| 58146692 | 8000_Mixed | Pasta, whole grain, with cream sauce, and added vegetables, home recipe                                            | 41 | 3.5 | B | 4 |
| 77201210 | 8000_Mixed | Green plantain with cracklings, Puerto Rican style                                                                 | 41 | 3.5 | D | 4 |
| 58148116 | 8000_Mixed | Macaroni or pasta salad, made with creamy dressing                                                                 | 41 | 4   | B | 4 |
| 27121000 | 8000_Mixed | Pork with chili and tomatoes                                                                                       | 41 | 4.5 | A | 4 |
| 27336310 | 8000_Mixed | Venison or deer, noodles, and vegetables excluding carrots, broccoli, and dark-green leafy; tomato-based sauce     | 41 | 4   | A | 4 |
| 58124250 | 8000_Mixed | Spanakopitta                                                                                                       | 41 | 3   | D | 4 |
| 28355310 | 8000_Mixed | Oyster stew                                                                                                        | 41 | 3   | C | 4 |
| 75404012 | 8000_Mixed | Beans, string, yellow, from frozen, creamed or with cheese sauce                                                   | 41 | 4   | B | 4 |
| 58137240 | 8000_Mixed | Pad Thai with seafood                                                                                              | 41 | 4   | B | 4 |
| 27320410 | 8000_Mixed | Ham, potatoes, and vegetables excluding carrots, broccoli, and dark-green leafy; no sauce                          | 41 | 4   | B | 4 |
| 58148150 | 8000_Mixed | Macaroni or pasta salad with shrimp                                                                                | 41 | 3.5 | B | 4 |
| 27311605 | 8000_Mixed | Beef, potatoes, and vegetables excluding carrots, broccoli, and dark-green leafy; gravy                            | 41 | 4.5 | B | 4 |
| 75340160 | 8000_Mixed | Vegetable and pasta combinations with cream or cheese sauce, broccoli, pasta, carrots, corn, zucchini, peppers, ci | 41 | 4   | B | 4 |
| 58130610 | 8000_Mixed | Lasagna with meat, whole wheat noodles                                                                             | 41 | 3.5 | C | 4 |
| 58174100 | 8000_Mixed | Dosa (Indian), with filling                                                                                        | 41 | 4.5 | A | 4 |
| 58100720 | 8000_Mixed | Enchilada with beans, meatless, red-chile or enchilada sauce                                                       | 41 | 4.5 | A | 4 |
| 77250110 | 8000_Mixed | Stuffed tannier fritters, Puerto Rican style                                                                       | 41 | 3   | D | 4 |
| 75404010 | 8000_Mixed | Beans, string, yellow, NS as to form, creamed or with cheese sauce                                                 | 41 | 4   | B | 4 |
| 75418010 | 8000_Mixed | Squash, summer, yellow or green, breaded or battered, fried                                                        | 41 | 4   | B | 4 |
| 74602300 | 8000_Mixed | Tomato soup, canned, reduced sodium, prepared with milk                                                            | 41 | 3.5 | B | 4 |
| 58100625 | 8000_Mixed | Enchilada with chicken and beans, green-chile or enchilada sauce                                                   | 41 | 4.5 | A | 4 |
| 27232000 | 8000_Mixed | Lamb or mutton and potatoes with tomato-based sauce                                                                | 40 | 4.5 | B | 4 |
| 72308000 | 8000_Mixed | Dark-green leafy vegetable soup with meat, Asian style                                                             | 40 | 5   | A | 4 |
| 28310230 | 8000_Mixed | Meatball soup, home recipe, Mexican style                                                                          | 40 | 4.5 | A | 4 |
| 41601180 | 8000_Mixed | Bean and ham soup, home recipe                                                                                     | 40 | 4.5 | A | 4 |
| 27211100 | 8000_Mixed | Beef stew with potatoes, tomato-based sauce                                                                        | 40 | 4.5 | A | 4 |
| 58146693 | 8000_Mixed | Pasta, whole grain, with cream sauce, and added vegetables, ready-to-heat                                          | 40 | 3   | C | 4 |
| 27564340 | 8000_Mixed | Frankfurter or hot dog sandwich, reduced fat or light, plain, on whole grain white bread                           | 40 | 3.5 | B | 4 |
| 58115150 | 8000_Mixed | Tamal in a leaf, Puerto Rican style                                                                                | 40 | 4   | A | 4 |
| 27115000 | 8000_Mixed | Beef with soy-based sauce                                                                                          | 40 | 3.5 | B | 4 |
| 28141050 | 8000_Mixed | Chicken patty parmigiana, breaded, with vegetable, diet frozen meal                                                | 40 | 4   | B | 4 |
| 27345510 | 8000_Mixed | Chicken or turkey, rice, and vegetables including carrots, broccoli, and/or dark-green leafy; tomato-based sauce   | 40 | 4   | B | 4 |
| 75402011 | 8000_Mixed | Beans, lima, immature, from fresh, creamed or with cheese sauce                                                    | 40 | 5   | A | 4 |
| 73111030 | 8000_Mixed | Peas and carrots, NS as to form, creamed                                                                           | 40 | 4   | B | 4 |
| 73111032 | 8000_Mixed | Peas and carrots, from frozen, creamed                                                                             | 40 | 4   | B | 4 |
| 77205610 | 8000_Mixed | Ripe plantain meat pie, Puerto Rican style                                                                         | 40 | 3.5 | D | 4 |
| 27446245 | 8000_Mixed | Chicken or turkey salad, made with light creamy dressing                                                           | 40 | 3.5 | B | 4 |
| 27260500 | 8000_Mixed | Vienna sausages stewed with potatoes, Puerto Rican style                                                           | 40 | 4   | C | 4 |
| 58146713 | 8000_Mixed | Pasta, whole grain, with cream sauce, meat, and added vegetables, ready-to-heat                                    | 40 | 3.5 | B | 4 |
| 74203011 | 8000_Mixed | Tomatoes, from fresh, scalloped                                                                                    | 40 | 4   | C | 4 |
| 27311210 | 8000_Mixed | Corned beef, potatoes, and vegetables including carrots, broccoli, and/or dark-green leafy; no sauce               | 40 | 4   | B | 4 |
| 73102231 | 8000_Mixed | Carrots, cooked, from fresh, creamed                                                                               | 40 | 4   | B | 4 |
| 58146160 | 8000_Mixed | Pasta with vegetables, no sauce or dressing                                                                        | 40 | 4.5 | A | 4 |
| 58146712 | 8000_Mixed | Pasta, whole grain, with cream sauce, meat, and added vegetables, home recipe                                      | 40 | 3.5 | B | 4 |
| 75646010 | 8000_Mixed | Shav soup                                                                                                          | 40 | 4   | B | 4 |
| 27220510 | 8000_Mixed | Ham or pork and potatoes with gravy                                                                                | 40 | 4   | B | 4 |
| 14640016 | 8000_Mixed | Cheese sandwich, reduced fat American cheese, on wheat bread, no spread                                            | 40 | 2   | D | 4 |
| 14640018 | 8000_Mixed | Cheese sandwich, reduced fat American cheese, on whole wheat bread, no spread                                      | 40 | 2   | D | 4 |
| 58146372 | 8000_Mixed | Pasta with tomato-based sauce, seafood, and added vegetables, home recipe                                          | 40 | 4   | A | 4 |
| 75601100 | 8000_Mixed | Borscht                                                                                                            | 40 | 4.5 | B | 4 |
| 27420520 | 8000_Mixed | Pork shish kabob with vegetables, excluding potatoes                                                               | 40 | 4.5 | A | 4 |



Supplementary Table 8. Original (uncorrected) scores for all food items.

|          |            |                                                                                                                  |    |     |   |   |
|----------|------------|------------------------------------------------------------------------------------------------------------------|----|-----|---|---|
| 58151410 | 8000_Mixed | Sushi, topped with eel                                                                                           | 40 | 3.5 | B | 4 |
| 28141650 | 8000_Mixed | Chicken and vegetables au gratin with rice, diet frozen entree                                                   | 40 | 3.5 | B | 4 |
| 58101830 | 8000_Mixed | Mexican casserole made with ground beef, tomato sauce, cheese, taco seasonings, and corn chips                   | 39 | 3   | C | 4 |
| 27446250 | 8000_Mixed | Chicken or turkey salad, made with Italian dressing                                                              | 39 | 3.5 | C | 4 |
| 75439010 | 8000_Mixed | Vegetable stew without meat                                                                                      | 39 | 4.5 | A | 4 |
| 14640004 | 8000_Mixed | Cheese sandwich, American cheese, on wheat bread, no spread                                                      | 39 | 2   | D | 4 |
| 14640006 | 8000_Mixed | Cheese sandwich, American cheese, on whole wheat bread, no spread                                                | 39 | 2   | D | 4 |
| 27242400 | 8000_Mixed | Chicken or turkey and noodles with tomato-based sauce                                                            | 39 | 3.5 | A | 4 |
| 75403021 | 8000_Mixed | Beans, string, green, cooked, from fresh, with mushroom sauce                                                    | 39 | 4.5 | B | 4 |
| 58146303 | 8000_Mixed | Pasta with tomato-based sauce, and added vegetables, ready-to-heat                                               | 39 | 4.5 | B | 4 |
| 27311410 | 8000_Mixed | Beef stew with potatoes and vegetables including carrots, broccoli, and/or dark-green leafy; gravy               | 39 | 4.5 | A | 4 |
| 58160150 | 8000_Mixed | Red beans and rice                                                                                               | 39 | 4.5 | A | 4 |
| 58146681 | 8000_Mixed | Pasta, whole grain, with cream sauce, restaurant                                                                 | 39 | 2   | D | 4 |
| 58127150 | 8000_Mixed | Vegetables and cheese in pastry                                                                                  | 39 | 3   | C | 4 |
| 58148170 | 8000_Mixed | Macaroni or pasta salad with chicken                                                                             | 39 | 3.5 | B | 4 |
| 58164800 | 8000_Mixed | Rice, brown, with cheese and/or cream based sauce, NS as to fat added in cooking                                 | 39 | 3.5 | B | 4 |
| 58164820 | 8000_Mixed | Rice, brown, with cheese and/or cream based sauce, fat added in cooking                                          | 39 | 3.5 | B | 4 |
| 27420270 | 8000_Mixed | Ham and vegetables excluding carrots, broccoli, and dark-green leafy; no potatoes, no sauce                      | 39 | 3.5 | C | 4 |
| 58104120 | 8000_Mixed | Nachos with cheese                                                                                               | 39 | 3   | C | 4 |
| 73102232 | 8000_Mixed | Carrots, cooked, from frozen, creamed                                                                            | 39 | 4   | B | 4 |
| 75402023 | 8000_Mixed | Beans, lima, immature, cooked, from canned, with mushroom sauce                                                  | 39 | 4.5 | A | 4 |
| 58146331 | 8000_Mixed | Pasta with tomato-based sauce, meat, and added vegetables, restaurant                                            | 39 | 4   | B | 4 |
| 75402020 | 8000_Mixed | Beans, lima, immature, cooked, NS as to form, with mushroom sauce                                                | 39 | 4.5 | A | 4 |
| 75402022 | 8000_Mixed | Beans, lima, immature, cooked, from frozen, with mushroom sauce                                                  | 39 | 4.5 | A | 4 |
| 58164870 | 8000_Mixed | Rice, brown, with soy-based sauce, fat not added in cooking                                                      | 39 | 3   | C | 4 |
| 73102230 | 8000_Mixed | Carrots, cooked, NS as to form, creamed                                                                          | 39 | 4   | B | 4 |
| 58137220 | 8000_Mixed | Pad Thai, meatless                                                                                               | 39 | 4   | B | 4 |
| 28350210 | 8000_Mixed | Clam chowder, NS as to Manhattan or New England style                                                            | 39 | 3.5 | B | 4 |
| 58146321 | 8000_Mixed | Pasta with tomato-based sauce and meat, restaurant                                                               | 39 | 3.5 | B | 4 |
| 27133010 | 8000_Mixed | Stewed goat, Puerto Rican style                                                                                  | 39 | 2   | D | 4 |
| 27420020 | 8000_Mixed | Ham or pork salad                                                                                                | 39 | 2   | D | 4 |
| 75410530 | 8000_Mixed | Chiles rellenos, filled with meat and cheese                                                                     | 39 | 3.5 | C | 4 |
| 28355120 | 8000_Mixed | Clam chowder, New England, prepared with milk                                                                    | 39 | 3.5 | B | 4 |
| 75407010 | 8000_Mixed | Cabbage, creamed                                                                                                 | 39 | 4   | B | 4 |
| 27211000 | 8000_Mixed | Beef and potatoes, no sauce                                                                                      | 39 | 4.5 | B | 4 |
| 58117410 | 8000_Mixed | Codfish fritter, Puerto Rican style                                                                              | 39 | 4   | B | 4 |
| 14640022 | 8000_Mixed | Cheese sandwich, reduced fat Cheddar cheese, on wheat bread, no spread                                           | 39 | 3.5 | C | 4 |
| 14640024 | 8000_Mixed | Cheese sandwich, reduced fat Cheddar cheese, on whole wheat bread, no spread                                     | 39 | 3.5 | C | 4 |
| 28355110 | 8000_Mixed | Clam chowder, New England, NS as to prepared with water or milk                                                  | 39 | 3.5 | B | 4 |
| 77316510 | 8000_Mixed | Stuffed cabbage, with meat and rice, Syrian dish, Puerto Rican style                                             | 39 | 4.5 | A | 4 |
| 58146701 | 8000_Mixed | Pasta, whole grain, with cream sauce and meat, restaurant                                                        | 39 | 2   | D | 4 |
| 27540295 | 8000_Mixed | Buffalo chicken submarine sandwich                                                                               | 39 | 3.5 | B | 4 |
| 75403020 | 8000_Mixed | Beans, string, green, cooked, NS as to form, with mushroom sauce                                                 | 39 | 4.5 | B | 4 |
| 75403022 | 8000_Mixed | Beans, string, green, cooked, from frozen, with mushroom sauce                                                   | 39 | 4.5 | B | 4 |
| 27111405 | 8000_Mixed | Chili con carne with beans, from restaurant                                                                      | 39 | 4   | C | 4 |
| 27111310 | 8000_Mixed | Beef stew, no potatoes, tomato-based sauce, with chili peppers, Mexican style                                    | 39 | 4.5 | A | 4 |
| 27311320 | 8000_Mixed | Beef stew with potatoes and vegetables excluding carrots, broccoli, and dark-green leafy; tomato-based sauce     | 39 | 4.5 | A | 4 |
| 58162090 | 8000_Mixed | Stuffed pepper, with meat                                                                                        | 38 | 4   | C | 4 |
| 27211200 | 8000_Mixed | Beef stew with potatoes, gravy                                                                                   | 38 | 4.5 | A | 4 |
| 41601110 | 8000_Mixed | Bean and ham soup, chunky style, canned or ready-to-serve                                                        | 38 | 4.5 | A | 4 |
| 28145000 | 8000_Mixed | Turkey dinner, NFS, frozen meal                                                                                  | 38 | 4   | B | 4 |
| 28145210 | 8000_Mixed | Turkey with gravy, dressing, potatoes, vegetable, frozen meal                                                    | 38 | 4   | B | 4 |
| 75409010 | 8000_Mixed | Cauliflower, NS as to form, creamed                                                                              | 38 | 4   | B | 4 |
| 75409013 | 8000_Mixed | Cauliflower, from canned, creamed                                                                                | 38 | 4   | B | 4 |
| 58403040 | 8000_Mixed | Chicken or turkey noodle soup, home recipe                                                                       | 38 | 3.5 | B | 4 |
| 58146722 | 8000_Mixed | Pasta, whole grain, with cream sauce and poultry, home recipe                                                    | 38 | 3.5 | B | 4 |
| 27311510 | 8000_Mixed | Shepherd's pie with beef                                                                                         | 38 | 4.5 | A | 4 |
| 27446400 | 8000_Mixed | Chicken or turkey and vegetables including carrots, broccoli, and/or dark-green leafy; no potatoes, cheese sauce | 38 | 3.5 | B | 4 |
| 75409012 | 8000_Mixed | Cauliflower, from frozen, creamed                                                                                | 38 | 4   | B | 4 |
| 58146353 | 8000_Mixed | Pasta with tomato-based sauce, poultry, and added vegetables, ready-to-heat                                      | 38 | 4   | A | 4 |
| 27320070 | 8000_Mixed | Ham or pork, noodles, and vegetables including carrots, broccoli, and/or dark-green leafy; tomato-based sauce    | 38 | 4   | A | 4 |
| 41602010 | 8000_Mixed | Pea and ham soup, chunky style, canned or ready-to-serve                                                         | 38 | 4.5 | A | 4 |
| 41602030 | 8000_Mixed | Split pea and ham soup                                                                                           | 38 | 4.5 | A | 4 |
| 75652040 | 8000_Mixed | Vegetable beef soup with noodles or pasta, home recipe                                                           | 38 | 4.5 | A | 4 |
| 58146723 | 8000_Mixed | Pasta, whole grain, with cream sauce and poultry, ready-to-heat                                                  | 38 | 3   | C | 4 |
| 72202030 | 8000_Mixed | Broccoli, batter-dipped and fried                                                                                | 38 | 4.5 | A | 4 |
| 27111200 | 8000_Mixed | Beef burgundy                                                                                                    | 38 | 4   | B | 4 |
| 28143020 | 8000_Mixed | Chicken and vegetable entree with rice, diet frozen meal                                                         | 38 | 4   | A | 4 |
| 27564410 | 8000_Mixed | Frankfurter or hot dog sandwich, fat free, plain, on multigrain bread                                            | 38 | 3.5 | B | 4 |
| 58146223 | 8000_Mixed | Pasta with tomato-based sauce, ready-to-heat                                                                     | 38 | 4   | B | 4 |
| 58100525 | 8000_Mixed | Enchilada with meat and beans, green-chile or enchilada sauce                                                    | 38 | 4.5 | A | 4 |
| 42302105 | 8000_Mixed | Peanut butter and jelly sandwich, with regular peanut butter, reduced sugar jelly, on white bread                | 38 | 3.5 | C | 4 |
| 27418110 | 8000_Mixed | Seasoned shredded soup meat                                                                                      | 38 | 4   | B | 4 |
| 58165410 | 8000_Mixed | Rice, brown, with vegetables, cheese and/or cream based sauce, fat not added in cooking                          | 38 | 3.5 | B | 4 |
| 58146343 | 8000_Mixed | Pasta with tomato-based sauce and poultry, ready-to-heat                                                         | 38 | 4   | A | 4 |
| 27218210 | 8000_Mixed | Beef stew with potatoes, Puerto Rican style                                                                      | 38 | 4   | D | 4 |
| 75417023 | 8000_Mixed | Peas, cooked, from canned, with mushroom sauce                                                                   | 38 | 4.5 | A | 4 |
| 27250122 | 8000_Mixed | Shrimp and noodles with gravy                                                                                    | 38 | 3.5 | A | 4 |
| 27213500 | 8000_Mixed | Beef and rice with soy-based sauce                                                                               | 38 | 3.5 | B | 4 |
| 27345520 | 8000_Mixed | Chicken or turkey, rice, and vegetables excluding carrots, broccoli, and dark-green leafy; tomato-based sauce    | 38 | 4   | B | 4 |
| 58148110 | 8000_Mixed | Macaroni or pasta salad, made with mayonnaise                                                                    | 38 | 3.5 | B | 4 |
| 73102253 | 8000_Mixed | Carrots, cooked, from canned, with cheese sauce                                                                  | 38 | 3.5 | C | 4 |
| 27420390 | 8000_Mixed | Pork chow mein or chop suey, no noodles                                                                          | 38 | 4.5 | A | 4 |
| 27136050 | 8000_Mixed | Venison or deer with tomato-based sauce                                                                          | 38 | 4   | B | 3 |
| 77141010 | 8000_Mixed | Potato chicken pie, Puerto Rican style                                                                           | 38 | 2   | D | 4 |
| 27550710 | 8000_Mixed | Tuna salad sandwich, with lettuce                                                                                | 38 | 3.5 | B | 4 |

Supplementary Table 8. Original (uncorrected) scores for all food items.

|          |            |                                                                                                                 |    |     |   |   |
|----------|------------|-----------------------------------------------------------------------------------------------------------------|----|-----|---|---|
| 27211150 | 8000_Mixed | Beef goulash with potatoes                                                                                      | 38 | 4.5 | A | 4 |
| 27330010 | 8000_Mixed | Shepherd's pie with lamb                                                                                        | 38 | 4.5 | B | 4 |
| 75404011 | 8000_Mixed | Beans, string, yellow, from fresh, creamed or with cheese sauce                                                 | 38 | 4   | B | 4 |
| 27331150 | 8000_Mixed | Veal fricassee, Puerto Rican style                                                                              | 38 | 4   | C | 4 |
| 28340680 | 8000_Mixed | Chicken or turkey and corn hominy soup, home recipe, Mexican style                                              | 37 | 4   | A | 4 |
| 27410250 | 8000_Mixed | Beef shish kabob with vegetables, excluding potatoes                                                            | 37 | 4.5 | A | 4 |
| 28340550 | 8000_Mixed | Sweet and sour soup                                                                                             | 37 | 3.5 | B | 4 |
| 75412010 | 8000_Mixed | Eggplant, batter-dipped, fried                                                                                  | 37 | 4.5 | A | 4 |
| 27350080 | 8000_Mixed | Tuna noodle casserole with vegetables, cream or white sauce                                                     | 37 | 3.5 | A | 4 |
| 41601160 | 8000_Mixed | Bean and ham soup, canned, reduced sodium, prepared with water or ready-to-serve                                | 37 | 5   | A | 4 |
| 27420450 | 8000_Mixed | Sausage and vegetables including carrots, broccoli, and/or dark-green leafy; no potatoes, tomato-based sauce    | 37 | 4   | C | 4 |
| 72302000 | 8000_Mixed | Broccoli soup, prepared with milk, home recipe, canned or ready-to-serve                                        | 37 | 3   | B | 4 |
| 75141500 | 8000_Mixed | Celery, stuffed with cheese                                                                                     | 37 | 4   | C | 4 |
| 75413010 | 8000_Mixed | Kohlrabi, creamed                                                                                               | 37 | 4   | B | 4 |
| 27313210 | 8000_Mixed | Beef, noodles, and vegetables including carrots, broccoli, and/or dark-green leafy; tomato-based sauce          | 37 | 4   | A | 4 |
| 27343010 | 8000_Mixed | Chicken or turkey, noodles, and vegetables including carrots, broccoli, and/or dark-green leafy; no sauce       | 37 | 3.5 | A | 4 |
| 27261000 | 8000_Mixed | Breaded brains, Puerto Rican style                                                                              | 37 | 3   | C | 4 |
| 27550720 | 8000_Mixed | Tuna salad sandwich                                                                                             | 37 | 3.5 | B | 4 |
| 58148120 | 8000_Mixed | Macaroni or pasta salad with egg                                                                                | 37 | 3.5 | B | 4 |
| 27111410 | 8000_Mixed | Chili con carne with beans                                                                                      | 37 | 4.5 | A | 4 |
| 58130310 | 8000_Mixed | Lasagna, meatless                                                                                               | 37 | 4   | B | 4 |
| 58130950 | 8000_Mixed | Lasagna, meatless, spinach noodles                                                                              | 37 | 3   | C | 4 |
| 27141050 | 8000_Mixed | Stewed chicken with tomato-based sauce, Mexican style                                                           | 37 | 3.5 | B | 4 |
| 58146150 | 8000_Mixed | Pasta with tomato-based sauce and cheese                                                                        | 37 | 4   | B | 4 |
| 27462000 | 8000_Mixed | Stewed chitterlings, Puerto Rican style                                                                         | 37 | 4   | B | 4 |
| 27460490 | 8000_Mixed | Julienne salad, meat, cheese, eggs, vegetables, no dressing                                                     | 37 | 4   | B | 4 |
| 27212500 | 8000_Mixed | Beef and noodles with soy-based sauce                                                                           | 37 | 3.5 | B | 4 |
| 75417012 | 8000_Mixed | Peas, from frozen, creamed                                                                                      | 37 | 4   | A | 4 |
| 27430610 | 8000_Mixed | Lamb shish kabob with vegetables, excluding potatoes                                                            | 37 | 4.5 | A | 4 |
| 14640064 | 8000_Mixed | Cheese sandwich, reduced fat American cheese, on wheat bread, with butter                                       | 37 | 1.5 | D | 4 |
| 14640066 | 8000_Mixed | Cheese sandwich, reduced fat American cheese, on whole wheat bread, with butter                                 | 37 | 1.5 | D | 4 |
| 27414200 | 8000_Mixed | Beef with vegetables excluding carrots, broccoli, and dark-green leafy; no potatoes, mushroom sauce             | 37 | 3.5 | B | 4 |
| 75417010 | 8000_Mixed | Peas, NS as to form, creamed                                                                                    | 37 | 4   | A | 4 |
| 27420010 | 8000_Mixed | Cabbage with ham hocks                                                                                          | 37 | 4.5 | A | 4 |
| 58101940 | 8000_Mixed | Taco or tostada salad, meatless                                                                                 | 37 | 4.5 | A | 4 |
| 27250124 | 8000_Mixed | Shrimp and noodles with mushroom sauce                                                                          | 37 | 3.5 | A | 4 |
| 28340180 | 8000_Mixed | Chicken or turkey broth, less or reduced sodium, canned or ready-to-serve                                       | 37 | 3.5 | B | 4 |
| 24209001 | 8000_Mixed | Turkey with barbecue sauce, skin not eaten                                                                      | 37 | 3.5 | C | 4 |
| 27311420 | 8000_Mixed | Beef stew with potatoes and vegetables excluding carrots, broccoli, and dark-green leafy; gravy                 | 37 | 4.5 | A | 4 |
| 72302100 | 8000_Mixed | Broccoli cheese soup, prepared with milk, home recipe, canned, or ready-to-serve                                | 37 | 3   | B | 4 |
| 58301020 | 8000_Mixed | Lasagna with cheese and sauce, diet frozen meal                                                                 | 37 | 4   | B | 4 |
| 27121010 | 8000_Mixed | Stewed pork, Puerto Rican style                                                                                 | 36 | 3.5 | C | 4 |
| 42302155 | 8000_Mixed | Peanut butter and jelly sandwich, with reduced fat peanut butter, reduced sugar jelly, on white bread           | 36 | 3.5 | C | 4 |
| 14640160 | 8000_Mixed | Grilled cheese sandwich, reduced fat American cheese, on wheat bread                                            | 36 | 1.5 | D | 4 |
| 14640165 | 8000_Mixed | Grilled cheese sandwich, reduced fat American cheese, on whole wheat bread                                      | 36 | 1.5 | D | 4 |
| 27350200 | 8000_Mixed | Oyster pie                                                                                                      | 36 | 3.5 | C | 4 |
| 27120100 | 8000_Mixed | Ham or pork with tomato-based sauce                                                                             | 36 | 4   | B | 3 |
| 27540320 | 8000_Mixed | Turkey salad or turkey spread sandwich                                                                          | 36 | 4   | B | 4 |
| 32105210 | 8000_Mixed | Chicken egg foo yung                                                                                            | 36 | 3.5 | B | 4 |
| 75403013 | 8000_Mixed | Beans, string, green, from canned, creamed or with cheese sauce                                                 | 36 | 4   | C | 4 |
| 28141250 | 8000_Mixed | Chicken with rice and vegetable, diet frozen meal                                                               | 36 | 4   | A | 4 |
| 58149210 | 8000_Mixed | Somen salad with noodles, lettuce, egg, fish, and pork                                                          | 36 | 3.5 | A | 4 |
| 14640052 | 8000_Mixed | Cheese sandwich, American cheese, on wheat bread, with butter                                                   | 36 | 1.5 | E | 4 |
| 14640054 | 8000_Mixed | Cheese sandwich, American cheese, on whole wheat bread, with butter                                             | 36 | 1.5 | E | 4 |
| 73111033 | 8000_Mixed | Peas and carrots, from canned, creamed                                                                          | 36 | 4   | B | 4 |
| 27460710 | 8000_Mixed | Livers, chicken, chopped, with eggs and onion                                                                   | 36 | 1.5 | D | 4 |
| 28340590 | 8000_Mixed | Chicken or turkey corn soup with noodles, home recipe                                                           | 36 | 4   | B | 4 |
| 14640110 | 8000_Mixed | Grilled cheese sandwich, American cheese, on wheat bread                                                        | 36 | 1.5 | E | 4 |
| 14640115 | 8000_Mixed | Grilled cheese sandwich, American cheese, on whole wheat bread                                                  | 36 | 1.5 | E | 4 |
| 28150510 | 8000_Mixed | Fish in lemon-butter sauce with starch item, vegetable, frozen meal                                             | 36 | 3.5 | B | 4 |
| 75656010 | 8000_Mixed | Vegetable soup, Spanish style, stew type                                                                        | 36 | 4.5 | B | 4 |
| 77513010 | 8000_Mixed | Spanish stew                                                                                                    | 36 | 4.5 | B | 4 |
| 27564242 | 8000_Mixed | Frankfurter or hot dog sandwich, chicken and/or turkey, plain, on whole wheat bun                               | 36 | 3.5 | C | 4 |
| 27347200 | 8000_Mixed | Chicken or turkey, stuffing, and vegetables including carrots, broccoli, and/or dark-green leafy; no sauce      | 36 | 3.5 | B | 4 |
| 27330210 | 8000_Mixed | Lamb or mutton stew with potatoes and vegetables including carrots, broccoli, and/or dark-green leafy; tomato-b | 36 | 4.5 | A | 4 |
| 27564270 | 8000_Mixed | Frankfurter or hot dog sandwich, chicken and/or turkey, plain, on whole wheat bread                             | 36 | 3.5 | C | 4 |
| 27330220 | 8000_Mixed | Lamb or mutton stew with potatoes and vegetables excluding carrots, broccoli, and dark-green leafy; tomato-basi | 36 | 4.5 | A | 4 |
| 27350410 | 8000_Mixed | Tuna noodle casserole with vegetables and mushroom sauce                                                        | 36 | 3.5 | A | 4 |
| 27416500 | 8000_Mixed | Beef and vegetables excluding carrots, broccoli, and dark-green leafy; no potatoes, gravy                       | 36 | 4   | A | 4 |
| 28143080 | 8000_Mixed | Chicken with noodles and cheese sauce, diet frozen meal                                                         | 36 | 4   | A | 4 |
| 58109130 | 8000_Mixed | Pizza, with meat, gluten-free thick crust                                                                       | 36 | 2   | D | 4 |
| 27243500 | 8000_Mixed | Chicken or turkey and rice with tomato-based sauce                                                              | 36 | 3.5 | B | 4 |
| 27320340 | 8000_Mixed | Pork, rice, and vegetables including carrots, broccoli, and/or dark-green leafy; tomato-based sauce             | 36 | 4   | B | 4 |
| 32203010 | 8000_Mixed | Egg salad sandwich                                                                                              | 36 | 3   | C | 4 |
| 28160650 | 8000_Mixed | Stuffed green pepper, frozen meal                                                                               | 36 | 4.5 | B | 4 |
| 75450510 | 8000_Mixed | Vegetable combination, excluding carrots, broccoli, and dark-green leafy; cooked, with cream sauce              | 36 | 4   | B | 4 |
| 27320120 | 8000_Mixed | Sausage, potatoes, and vegetables including carrots, broccoli, and/or dark-green leafy; gravy                   | 36 | 4   | B | 4 |
| 27313220 | 8000_Mixed | Beef, noodles, and vegetables excluding carrots, broccoli, and dark-green leafy; tomato-based sauce             | 36 | 4   | B | 4 |
| 58146222 | 8000_Mixed | Pasta with tomato-based sauce, home recipe                                                                      | 36 | 4.5 | A | 4 |
| 58127510 | 8000_Mixed | Vegetable submarine sandwich, with spread                                                                       | 36 | 3.5 | C | 4 |
| 58156610 | 8000_Mixed | Pigeon pea asopao, Asopao de gandules                                                                           | 36 | 4   | B | 4 |
| 58146352 | 8000_Mixed | Pasta with tomato-based sauce, poultry, and added vegetables, home recipe                                       | 36 | 4   | A | 4 |
| 75410010 | 8000_Mixed | Celery, creamed                                                                                                 | 35 | 4   | B | 4 |
| 58110130 | 8000_Mixed | Egg roll, with beef and/or pork                                                                                 | 35 | 3   | C | 4 |
| 58409000 | 8000_Mixed | Noodle soup, with fish ball, shrimp, and dark green leafy vegetable                                             | 35 | 3.5 | B | 4 |
| 27250260 | 8000_Mixed | Lobster with bread stuffing, baked                                                                              | 35 | 2   | D | 4 |

Supplementary Table 8. Original (uncorrected) scores for all food items.

|          |            |                                                                                                                     |    |     |   |   |
|----------|------------|---------------------------------------------------------------------------------------------------------------------|----|-----|---|---|
| 58162110 | 8000_Mixed | Stuffed pepper, with rice and meat                                                                                  | 35 | 4   | C | 4 |
| 27540310 | 8000_Mixed | Turkey sandwich, with spread                                                                                        | 35 | 4   | B | 4 |
| 75409011 | 8000_Mixed | Cauliflower, from fresh, creamed                                                                                    | 35 | 4   | B | 4 |
| 75403023 | 8000_Mixed | Beans, string, green, cooked, from canned, with mushroom sauce                                                      | 35 | 4   | C | 4 |
| 14640010 | 8000_Mixed | Cheese sandwich, Cheddar cheese, on wheat bread, no spread                                                          | 35 | 2   | D | 4 |
| 14640012 | 8000_Mixed | Cheese sandwich, Cheddar cheese, on whole wheat bread, no spread                                                    | 35 | 2   | D | 4 |
| 28110510 | 8000_Mixed | Beef, sliced, with gravy, potatoes, vegetable, frozen meal                                                          | 35 | 4   | B | 4 |
| 58146702 | 8000_Mixed | Pasta, whole grain, with cream sauce and meat, home recipe                                                          | 35 | 3.5 | B | 4 |
| 58146342 | 8000_Mixed | Pasta with tomato-based sauce and poultry, home recipe                                                              | 35 | 4   | A | 4 |
| 14640070 | 8000_Mixed | Cheese sandwich, reduced fat Cheddar cheese, on wheat bread, with butter                                            | 35 | 1.5 | D | 4 |
| 14640072 | 8000_Mixed | Cheese sandwich, reduced fat Cheddar cheese, on whole wheat bread, with butter                                      | 35 | 1.5 | D | 4 |
| 28143110 | 8000_Mixed | Chicken cacciatore with noodles, diet frozen meal                                                                   | 35 | 4   | A | 4 |
| 28311020 | 8000_Mixed | Menudo soup, home recipe                                                                                            | 35 | 4   | B | 4 |
| 58136130 | 8000_Mixed | Lo mein, with shrimp                                                                                                | 35 | 3.5 | A | 4 |
| 58155310 | 8000_Mixed | Paella with meat, Valenciana style                                                                                  | 35 | 2   | D | 4 |
| 58164810 | 8000_Mixed | Rice, brown, with cheese and/or cream based sauce, fat not added in cooking                                         | 35 | 3.5 | B | 4 |
| 75440510 | 8000_Mixed | Vegetable combinations, excluding carrots, broccoli, and dark-green leafy; cooked, with cheese sauce                | 35 | 4   | B | 4 |
| 58146682 | 8000_Mixed | Pasta, whole grain, with cream sauce, home recipe                                                                   | 35 | 3   | C | 4 |
| 58305250 | 8000_Mixed | Pasta with vegetable and cheese sauce, diet frozen meal                                                             | 35 | 3.5 | B | 4 |
| 14640190 | 8000_Mixed | Grilled cheese sandwich, reduced fat Cheddar cheese, on wheat bread                                                 | 35 | 1.5 | D | 4 |
| 14640195 | 8000_Mixed | Grilled cheese sandwich, reduced fat Cheddar cheese, on whole wheat bread                                           | 35 | 1.5 | D | 4 |
| 58100635 | 8000_Mixed | Enchilada with chicken, green-chile or enchilada sauce                                                              | 35 | 4   | A | 4 |
| 75403011 | 8000_Mixed | Beans, string, green, from fresh, creamed or with cheese sauce                                                      | 35 | 4   | B | 4 |
| 27564280 | 8000_Mixed | Frankfurter or hot dog sandwich, chicken and/or turkey, plain, on whole grain white bread                           | 35 | 3.5 | C | 4 |
| 75460810 | 8000_Mixed | Vegetable combinations, excluding carrots, broccoli, and dark-green leafy; cooked, with butter sauce and pasta      | 35 | 4.5 | A | 4 |
| 28340800 | 8000_Mixed | Chicken or turkey soup with vegetables and fruit, Asian Style                                                       | 35 | 3   | C | 4 |
| 27146200 | 8000_Mixed | Chicken or turkey with cheese sauce                                                                                 | 35 | 3.5 | C | 3 |
| 58110170 | 8000_Mixed | Egg roll, with chicken or turkey                                                                                    | 35 | 3.5 | B | 4 |
| 58146703 | 8000_Mixed | Pasta, whole grain, with cream sauce and meat, ready-to-heat                                                        | 35 | 3   | C | 4 |
| 58100620 | 8000_Mixed | Enchilada with chicken and beans, red-chile or enchilada sauce                                                      | 35 | 4.5 | A | 4 |
| 42302010 | 8000_Mixed | Peanut butter and jelly sandwich, NFS                                                                               | 35 | 3.5 | D | 4 |
| 42302015 | 8000_Mixed | Peanut butter and jelly sandwich, with regular peanut butter, regular jelly, on white bread                         | 35 | 3.5 | D | 4 |
| 42303100 | 8000_Mixed | Peanut butter and jelly sandwich, frozen commercial product without crusts                                          | 35 | 3.5 | D | 4 |
| 58301050 | 8000_Mixed | Lasagna with cheese and meat sauce, diet frozen meal                                                                | 35 | 4.5 | A | 4 |
| 58304400 | 8000_Mixed | Linguini with vegetables and seafood in white wine sauce, diet frozen meal                                          | 35 | 3.5 | B | 4 |
| 58151430 | 8000_Mixed | Sushi, topped with shrimp                                                                                           | 35 | 3.5 | A | 3 |
| 28140730 | 8000_Mixed | Chicken patty, breaded, with tomato sauce and cheese, fettuccine alfredo, vegetable, frozen meal                    | 35 | 4   | A | 4 |
| 27446255 | 8000_Mixed | Chicken or turkey salad, made with light Italian dressing                                                           | 35 | 3.5 | B | 4 |
| 27146110 | 8000_Mixed | Sweet and sour chicken or turkey, without vegetables                                                                | 35 | 3.5 | B | 4 |
| 27315210 | 8000_Mixed | Beef, rice, and vegetables including carrots, broccoli, and/or dark-green leafy; tomato-based sauce                 | 35 | 4   | B | 4 |
| 72302020 | 8000_Mixed | Broccoli soup, prepared with water, home recipe, canned, or ready-to-serve                                          | 35 | 3   | B | 4 |
| 75417013 | 8000_Mixed | Peas, from canned, creamed                                                                                          | 34 | 4   | A | 4 |
| 58148550 | 8000_Mixed | Macaroni or pasta salad with meat                                                                                   | 34 | 3.5 | B | 4 |
| 27343020 | 8000_Mixed | Chicken or turkey, noodles, and vegetables excluding carrots, broccoli, and dark-green leafy; no sauce              | 34 | 3.5 | A | 4 |
| 58110110 | 8000_Mixed | Egg roll, meatless                                                                                                  | 34 | 3.5 | C | 4 |
| 27445150 | 8000_Mixed | General Tso chicken                                                                                                 | 34 | 3   | C | 4 |
| 58110120 | 8000_Mixed | Egg roll, with shrimp                                                                                               | 34 | 3.5 | C | 4 |
| 42302055 | 8000_Mixed | Peanut butter and jelly sandwich, with reduced fat peanut butter, regular jelly, on white bread                     | 34 | 3.5 | C | 4 |
| 75418051 | 8000_Mixed | Squash, summer, from fresh, creamed                                                                                 | 34 | 4   | B | 4 |
| 27343470 | 8000_Mixed | Chicken or turkey, noodles, and vegetables including carrots, broccoli, and/or dark-green leafy; cream sauce, white | 34 | 3.5 | B | 4 |
| 27430580 | 8000_Mixed | Veal with vegetables including carrots, broccoli, and/or dark-green leafy; no potatoes, cream or white sauce        | 34 | 3.5 | A | 4 |
| 58148114 | 8000_Mixed | Macaroni or pasta salad, made with Italian dressing                                                                 | 34 | 4   | A | 4 |
| 75404013 | 8000_Mixed | Beans, string, yellow, from canned, creamed or with cheese sauce                                                    | 34 | 4   | C | 4 |
| 27564350 | 8000_Mixed | Frankfurter or hot dog sandwich, reduced fat or light, plain, on multigrain bread                                   | 34 | 3.5 | B | 4 |
| 27146300 | 8000_Mixed | Chicken or turkey parmigiana                                                                                        | 34 | 3.5 | B | 4 |
| 27343410 | 8000_Mixed | Chicken or turkey, noodles, and vegetables including carrots, broccoli, and/or dark-green leafy; gravy              | 34 | 3.5 | B | 4 |
| 28140720 | 8000_Mixed | Chicken patty, or nuggets, boneless, breaded, potatoes, vegetable, frozen meal                                      | 34 | 4.5 | B | 4 |
| 58104090 | 8000_Mixed | Nachos with cheese and sour cream                                                                                   | 34 | 4   | A | 4 |
| 75652050 | 8000_Mixed | Vegetable beef soup with rice, home recipe                                                                          | 34 | 4.5 | B | 4 |
| 58137210 | 8000_Mixed | Pad Thai, NFS                                                                                                       | 34 | 4   | B | 4 |
| 58137230 | 8000_Mixed | Pad Thai with chicken                                                                                               | 34 | 4   | B | 4 |
| 58160550 | 8000_Mixed | Rice, white, with dark green vegetables, NS as to fat added in cooking                                              | 34 | 3.5 | B | 4 |
| 58160570 | 8000_Mixed | Rice, white, with dark green vegetables, fat added in cooking                                                       | 34 | 3.5 | B | 4 |
| 28110270 | 8000_Mixed | Sirloin beef, with gravy, potatoes, vegetable, frozen meal                                                          | 34 | 4   | A | 4 |
| 14620330 | 8000_Mixed | Topping from meat and vegetable pizza                                                                               | 34 | 1.5 | E | 4 |
| 73102233 | 8000_Mixed | Carrots, cooked, from canned, creamed                                                                               | 34 | 3.5 | C | 4 |
| 27311220 | 8000_Mixed | Corned beef, potatoes, and vegetables excluding carrots, broccoli, and dark-green leafy; no sauce                   | 34 | 4.5 | B | 4 |
| 75418020 | 8000_Mixed | Squash, summer, casserole with tomato and cheese                                                                    | 34 | 4   | B | 4 |
| 27250900 | 8000_Mixed | Fish and noodles with mushroom sauce                                                                                | 34 | 3.5 | B | 4 |
| 27146100 | 8000_Mixed | Sweet and sour chicken or turkey                                                                                    | 34 | 3.5 | B | 4 |
| 75416010 | 8000_Mixed | Parsnips, creamed                                                                                                   | 34 | 4   | B | 4 |
| 27120090 | 8000_Mixed | Ham or pork with mushroom sauce                                                                                     | 34 | 4   | B | 3 |
| 58101720 | 8000_Mixed | Taco or tostada with beans                                                                                          | 34 | 4   | B | 4 |
| 27360080 | 8000_Mixed | Chow mein or chop suey, NS as to type of meat, with noodles                                                         | 34 | 4   | A | 4 |
| 58109120 | 8000_Mixed | Pizza, with meat, gluten-free thin crust                                                                            | 34 | 2   | D | 4 |
| 58146302 | 8000_Mixed | Pasta with tomato-based sauce, and added vegetables, home recipe                                                    | 34 | 4.5 | A | 4 |
| 51136000 | 8000_Mixed | Bruschetta                                                                                                          | 34 | 4   | B | 4 |
| 27343910 | 8000_Mixed | Chicken or turkey chow mein or chop suey with noodles                                                               | 34 | 4   | A | 4 |
| 27144000 | 8000_Mixed | Chicken or turkey with mushroom sauce                                                                               | 34 | 4   | B | 4 |
| 27250710 | 8000_Mixed | Tuna and rice with mushroom sauce                                                                                   | 34 | 3.5 | B | 4 |
| 58301110 | 8000_Mixed | Vegetable lasagna, frozen meal                                                                                      | 34 | 4   | B | 4 |
| 75415011 | 8000_Mixed | Onions, from fresh, creamed                                                                                         | 34 | 4   | B | 4 |
| 58148117 | 8000_Mixed | Macaroni or pasta salad, made with light creamy dressing                                                            | 34 | 4   | A | 4 |
| 58402100 | 8000_Mixed | Beef noodle soup, home recipe                                                                                       | 34 | 3.5 | A | 4 |
| 27211300 | 8000_Mixed | Beef, roast, hash                                                                                                   | 34 | 4.5 | B | 4 |
| 58146683 | 8000_Mixed | Pasta, whole grain, with cream sauce, ready-to-heat                                                                 | 34 | 3   | C | 4 |

Supplementary Table 8. Original (uncorrected) scores for all food items.

|          |            |                                                                                                                   |    |     |   |   |
|----------|------------|-------------------------------------------------------------------------------------------------------------------|----|-----|---|---|
| 27320350 | 8000_Mixed | Pork, rice, and vegetables excluding carrots, broccoli, and dark-green leafy; tomato-based sauce                  | 34 | 4   | B | 4 |
| 58100805 | 8000_Mixed | Enchilada, just cheese, meatless, no beans, green-chile or enchilada sauce                                        | 33 | 4   | C | 4 |
| 28340310 | 8000_Mixed | Chicken or turkey gumbo soup, home recipe, canned or ready-to-serve                                               | 33 | 4   | C | 4 |
| 58162130 | 8000_Mixed | Stuffed tomato, with rice and meat                                                                                | 33 | 4   | B | 4 |
| 27510587 | 8000_Mixed | Hamburger, 1 small patty, with condiments, on whole wheat bun                                                     | 33 | 3.5 | B | 4 |
| 75418052 | 8000_Mixed | Squash, summer, from frozen, creamed                                                                              | 33 | 4   | B | 4 |
| 75418050 | 8000_Mixed | Squash, summer, NS as to form, creamed                                                                            | 33 | 4   | B | 4 |
| 27550100 | 8000_Mixed | Fish sandwich, on bun, with cheese and spread                                                                     | 33 | 3   | C | 4 |
| 75405010 | 8000_Mixed | Beets with Harvard sauce                                                                                          | 33 | 4   | C | 3 |
| 27118180 | 8000_Mixed | Beef stew, meat with gravy, no potatoes, Puerto Rican style                                                       | 33 | 3.5 | C | 4 |
| 27411120 | 8000_Mixed | Swiss steak                                                                                                       | 33 | 4   | A | 4 |
| 27250610 | 8000_Mixed | Tuna noodle casserole with cream or white sauce                                                                   | 33 | 3.5 | B | 4 |
| 27540120 | 8000_Mixed | Chicken salad or chicken spread sandwich                                                                          | 33 | 3.5 | B | 4 |
| 27430590 | 8000_Mixed | Veal with vegetables excluding carrots, broccoli, and dark-green leafy; and potatoes, cream or white sauce        | 33 | 3.5 | A | 4 |
| 27313110 | 8000_Mixed | Beef chow mein or chop suey with noodles                                                                          | 33 | 4.5 | A | 4 |
| 58421080 | 8000_Mixed | Sopa de tortilla, Mexican style tortilla soup, home recipe                                                        | 33 | 3.5 | C | 4 |
| 28340220 | 8000_Mixed | Chicken soup with noodles and potatoes, Puerto Rican style                                                        | 33 | 4.5 | A | 4 |
| 27341045 | 8000_Mixed | Chicken or turkey, potatoes, and vegetables including carrots, broccoli, and/or dark-green leafy; cheese sauce    | 33 | 4   | B | 4 |
| 27564122 | 8000_Mixed | Frankfurter or hot dog sandwich, beef and pork, plain, on whole wheat bun                                         | 33 | 2   | D | 4 |
| 27540296 | 8000_Mixed | Buffalo chicken submarine sandwich with cheese                                                                    | 33 | 3.5 | C | 4 |
| 75603010 | 8000_Mixed | Celery soup, cream of, prepared with milk, home recipe, canned or ready-to-serve                                  | 33 | 3   | C | 4 |
| 72202010 | 8000_Mixed | Broccoli casserole with noodles                                                                                   | 33 | 4   | A | 4 |
| 58401010 | 8000_Mixed | Barley soup, home recipe, canned, or ready-to-serve                                                               | 33 | 4   | B | 3 |
| 58101935 | 8000_Mixed | Taco or tostada salad with chicken                                                                                | 33 | 4   | A | 4 |
| 27345010 | 8000_Mixed | Chicken or turkey, rice, and vegetables including carrots, broccoli, and/or dark-green leafy; no sauce            | 33 | 3.5 | A | 4 |
| 28113110 | 8000_Mixed | Salisbury steak, baked, with tomato sauce, vegetable, diet frozen meal                                            | 33 | 4   | A | 4 |
| 58104260 | 8000_Mixed | Gordita, sope, or chalupa with beans                                                                              | 33 | 4   | A | 4 |
| 27330110 | 8000_Mixed | Lamb or mutton stew with potatoes and vegetables excluding carrots, broccoli, and dark-green leafy; gravy         | 33 | 5   | A | 4 |
| 58130150 | 8000_Mixed | Lasagna, with chicken or turkey, and spinach                                                                      | 33 | 3.5 | C | 4 |
| 27550000 | 8000_Mixed | Fish sandwich, on bun, with spread                                                                                | 33 | 3   | C | 4 |
| 58100320 | 8000_Mixed | Burrito with beans, meatless                                                                                      | 33 | 4   | C | 4 |
| 27250126 | 8000_Mixed | Shrimp and noodles with cream or white sauce                                                                      | 33 | 3.5 | A | 4 |
| 27510642 | 8000_Mixed | Hamburger, 1 medium patty, with condiments, on wheat bun                                                          | 32 | 3.5 | B | 4 |
| 27510643 | 8000_Mixed | Hamburger, 1 medium patty, with condiments, on whole wheat bun                                                    | 32 | 3.5 | B | 4 |
| 28340210 | 8000_Mixed | Chicken rice soup, Puerto Rican style                                                                             | 32 | 4.5 | A | 4 |
| 58130910 | 8000_Mixed | Lasagna with meat, spinach noodles                                                                                | 32 | 3   | C | 4 |
| 75418053 | 8000_Mixed | Squash, summer, from canned, creamed                                                                              | 32 | 4   | B | 4 |
| 28340630 | 8000_Mixed | Chicken or turkey vegetable soup with rice, stew type, chunky style                                               | 32 | 4   | B | 4 |
| 27111407 | 8000_Mixed | Chili con carne with beans, canned                                                                                | 32 | 4.5 | A | 4 |
| 24209000 | 8000_Mixed | Turkey with barbecue sauce, skin eaten                                                                            | 32 | 3.5 | D | 4 |
| 27343480 | 8000_Mixed | Chicken or turkey, noodles, and vegetables excluding carrots, broccoli, and/or dark-green leafy; cream sauce, whi | 32 | 3.5 | B | 4 |
| 27347210 | 8000_Mixed | Chicken or turkey, stuffing, and vegetables excluding carrots, broccoli, and dark green leafy; no sauce           | 32 | 3.5 | B | 4 |
| 28310320 | 8000_Mixed | Beef noodle soup, Puerto Rican style                                                                              | 32 | 4.5 | B | 4 |
| 58101610 | 8000_Mixed | Soft taco with beans                                                                                              | 32 | 4.5 | B | 4 |
| 27564182 | 8000_Mixed | Frankfurter or hot dog sandwich, meat and poultry, plain, on whole wheat bun                                      | 32 | 2   | D | 4 |
| 14640058 | 8000_Mixed | Cheese sandwich, Cheddar cheese, on wheat bread, with butter                                                      | 32 | 1.5 | D | 4 |
| 14640060 | 8000_Mixed | Cheese sandwich, Cheddar cheese, on whole wheat bread, with butter                                                | 32 | 1.5 | D | 4 |
| 27446410 | 8000_Mixed | Chicken or turkey and vegetables excluding carrots, broccoli, and dark-green leafy; no potatoes, cheese sauce     | 32 | 3.5 | C | 4 |
| 27118130 | 8000_Mixed | Stewed dried beef, Puerto Rican style                                                                             | 32 | 0.5 | D | 4 |
| 58106820 | 8000_Mixed | Pizza with beans and vegetables, thin crust                                                                       | 32 | 4   | C | 4 |
| 58151200 | 8000_Mixed | Sushi roll, salmon                                                                                                | 32 | 3.5 | B | 4 |
| 27136080 | 8000_Mixed | Venison or deer with gravy                                                                                        | 32 | 4   | B | 3 |
| 75651110 | 8000_Mixed | Vegetable chicken rice soup, canned, prepared with water or ready-to-serve                                        | 32 | 4   | B | 4 |
| 58404030 | 8000_Mixed | Chicken or turkey rice soup, home recipe                                                                          | 32 | 3.5 | B | 4 |
| 28110250 | 8000_Mixed | Sirloin tips, with gravy, potatoes, vegetable, frozen meal                                                        | 32 | 4.5 | A | 4 |
| 58134210 | 8000_Mixed | Stuffed shells, with chicken, with tomato sauce                                                                   | 32 | 4.5 | A | 4 |
| 27120020 | 8000_Mixed | Ham or pork with gravy                                                                                            | 32 | 4   | B | 3 |
| 14640130 | 8000_Mixed | Grilled cheese sandwich, Cheddar cheese, on wheat bread                                                           | 32 | 1.5 | D | 4 |
| 14640135 | 8000_Mixed | Grilled cheese sandwich, Cheddar cheese, on whole wheat bread                                                     | 32 | 1.5 | D | 4 |
| 27315220 | 8000_Mixed | Beef, rice, and vegetables excluding carrots, broccoli, and/or dark-green leafy; tomato-based sauce               | 32 | 4   | B | 4 |
| 75415010 | 8000_Mixed | Onions, NS as to form, creamed                                                                                    | 32 | 4   | B | 4 |
| 27510576 | 8000_Mixed | Hamburger, 1 small patty, plain, on wheat bun                                                                     | 32 | 3.5 | C | 4 |
| 27510577 | 8000_Mixed | Hamburger, 1 small patty, plain, on whole wheat bun                                                               | 32 | 3.5 | C | 4 |
| 28340179 | 8000_Mixed | Beef broth, less or reduced sodium, canned or ready-to-serve                                                      | 32 | 3.5 | B | 4 |
| 58104150 | 8000_Mixed | Nachos with chicken and cheese                                                                                    | 32 | 4   | B | 4 |
| 75402010 | 8000_Mixed | Beans, lima, immature, NS as to form, creamed or with cheese sauce                                                | 32 | 4.5 | A | 4 |
| 75402013 | 8000_Mixed | Beans, lima, immature, from canned, creamed or with cheese sauce                                                  | 32 | 4.5 | A | 4 |
| 75402012 | 8000_Mixed | Beans, lima, immature, from frozen, creamed or with cheese sauce                                                  | 32 | 4.5 | A | 4 |
| 75418103 | 8000_Mixed | Turnips, from canned, creamed                                                                                     | 32 | 4   | B | 4 |
| 58156710 | 8000_Mixed | Rice with stewed beans, Puerto Rican style                                                                        | 32 | 3.5 | B | 4 |
| 27111100 | 8000_Mixed | Beef goulash                                                                                                      | 32 | 4   | A | 4 |
| 74701000 | 8000_Mixed | Tomato sandwich                                                                                                   | 32 | 4   | B | 4 |
| 27320130 | 8000_Mixed | Sausage, potatoes, and vegetables excluding carrots, broccoli, and dark-green leafy; gravy                        | 32 | 4   | B | 4 |
| 32105220 | 8000_Mixed | Pork egg foo yung                                                                                                 | 32 | 3.5 | B | 4 |
| 27320027 | 8000_Mixed | Ham or pork, noodles, and vegetables including carrots, broccoli, and/or dark-green leafy; no sauce               | 32 | 3.5 | A | 4 |
| 58101955 | 8000_Mixed | Taco or tostada salad, meatless with sour cream                                                                   | 32 | 4.5 | B | 4 |
| 58151190 | 8000_Mixed | Sushi roll, ee!                                                                                                   | 32 | 3.5 | B | 4 |
| 73502000 | 8000_Mixed | Squash, winter type, soup, home recipe, canned, or ready-to-serve                                                 | 32 | 4   | C | 4 |
| 58100520 | 8000_Mixed | Enchilada with meat and beans, red-chile or enchilada sauce                                                       | 32 | 4.5 | A | 4 |
| 58130320 | 8000_Mixed | Lasagna, meatless, with vegetables                                                                                | 32 | 3.5 | C | 4 |
| 28310420 | 8000_Mixed | Beef and rice soup, Puerto Rican style                                                                            | 32 | 4.5 | B | 4 |
| 58301150 | 8000_Mixed | Zucchini lasagna, diet frozen meal                                                                                | 32 | 4.5 | B | 4 |
| 27146360 | 8000_Mixed | Sesame chicken                                                                                                    | 32 | 2   | D | 4 |
| 58104180 | 8000_Mixed | Nachos with meat, cheese, and sour cream                                                                          | 32 | 3.5 | B | 4 |
| 27220520 | 8000_Mixed | Ham or pork and potatoes with cheese sauce                                                                        | 32 | 4   | B | 4 |
| 27135030 | 8000_Mixed | Veal with cream sauce                                                                                             | 32 | 4   | B | 3 |

Supplementary Table 8. Original (uncorrected) scores for all food items.

|          |            |                                                                                                                     |    |     |   |   |
|----------|------------|---------------------------------------------------------------------------------------------------------------------|----|-----|---|---|
| 27416100 | 8000_Mixed | Beef and vegetables, Hawaiian style                                                                                 | 32 | 4   | C | 4 |
| 32105240 | 8000_Mixed | Beef egg foo yung                                                                                                   | 32 | 3.5 | B | 4 |
| 28320140 | 8000_Mixed | Ham, noodle, and vegetable soup, Puerto Rican style                                                                 | 31 | 4   | C | 4 |
| 58100300 | 8000_Mixed | Burrito with beans and rice, meatless                                                                               | 31 | 3.5 | C | 4 |
| 58130014 | 8000_Mixed | Lasagna with meat, from restaurant                                                                                  | 31 | 3   | C | 4 |
| 27510632 | 8000_Mixed | Hamburger, 1 medium patty, plain, on wheat bun                                                                      | 31 | 3.5 | C | 4 |
| 27510633 | 8000_Mixed | Hamburger, 1 medium patty, plain, on whole wheat bun                                                                | 31 | 3.5 | C | 4 |
| 27242000 | 8000_Mixed | Chicken or turkey and noodles, no sauce                                                                             | 31 | 3.5 | B | 4 |
| 27564150 | 8000_Mixed | Frankfurter or hot dog sandwich, beef and pork, plain, on whole wheat bread                                         | 31 | 2   | D | 4 |
| 75142600 | 8000_Mixed | Cucumber salad made with cucumber and vinegar                                                                       | 31 | 4   | B | 3 |
| 28160710 | 8000_Mixed | Stuffed cabbage, with meat and tomato sauce, diet frozen meal                                                       | 31 | 4.5 | A | 4 |
| 27143000 | 8000_Mixed | Chicken or turkey with cream sauce                                                                                  | 31 | 4   | B | 4 |
| 27330030 | 8000_Mixed | Lamb or mutton stew with potatoes and vegetables including carrots, broccoli, and/or dark-green leafy; gravy        | 31 | 4.5 | A | 4 |
| 27347220 | 8000_Mixed | Chicken or turkey, stuffing, and vegetables including carrots, broccoli, and/or dark-green leafy; gravy             | 31 | 3.5 | B | 4 |
| 27446260 | 8000_Mixed | Chicken or turkey salad, made with any type of fat free dressing                                                    | 31 | 3.5 | B | 4 |
| 27564160 | 8000_Mixed | Frankfurter or hot dog sandwich, beef and pork, plain, on whole grain white bread                                   | 31 | 2   | D | 4 |
| 58304200 | 8000_Mixed | Ravioli, cheese-filled, with tomato sauce, diet frozen meal                                                         | 31 | 4   | B | 4 |
| 75142000 | 8000_Mixed | Cucumber and vegetable namasu                                                                                       | 31 | 4   | C | 3 |
| 58117310 | 8000_Mixed | Kibby, Puerto Rican style                                                                                           | 31 | 3.5 | B | 4 |
| 58120110 | 8000_Mixed | Crepe, filled with meat, poultry, or seafood, with sauce                                                            | 31 | 3.5 | C | 4 |
| 58201045 | 8000_Mixed | Jelly sandwich, reduced sugar jelly, on wheat bread                                                                 | 31 | 3.5 | A | 4 |
| 58201055 | 8000_Mixed | Jelly sandwich, reduced sugar jelly, on whole wheat bread                                                           | 31 | 3.5 | A | 4 |
| 27250630 | 8000_Mixed | Tuna noodle casserole with mushroom sauce                                                                           | 31 | 3.5 | B | 4 |
| 58302050 | 8000_Mixed | Beef and noodles with meat sauce and cheese, diet frozen meal                                                       | 31 | 4   | B | 4 |
| 58111120 | 8000_Mixed | Wonton, fried, meatless                                                                                             | 31 | 3.5 | B | 4 |
| 27343420 | 8000_Mixed | Chicken or turkey, noodles, and vegetables excluding carrots, broccoli, and dark-green leafy; gravy                 | 31 | 3.5 | B | 4 |
| 58140310 | 8000_Mixed | Macaroni with tuna, Puerto Rican style                                                                              | 31 | 3.5 | B | 4 |
| 27540270 | 8000_Mixed | Chicken fillet, broiled, sandwich, with lettuce, tomato, and non-mayonnaise type spread                             | 31 | 4   | B | 4 |
| 27111000 | 8000_Mixed | Beef with tomato-based sauce                                                                                        | 31 | 4   | B | 3 |
| 27540235 | 8000_Mixed | Chicken fillet, broiled, sandwich with lettuce, tomato, and spread                                                  | 31 | 4   | B | 4 |
| 27510206 | 8000_Mixed | Cheeseburger, 1 small patty, with condiments, on wheat bun                                                          | 31 | 3.5 | C | 4 |
| 27510207 | 8000_Mixed | Cheeseburger, 1 small patty, with condiments, on whole wheat bun                                                    | 31 | 3.5 | C | 4 |
| 75652030 | 8000_Mixed | Vegetable beef soup, canned, prepared with milk                                                                     | 31 | 3.5 | B | 4 |
| 27360120 | 8000_Mixed | Chow mein or chop suey, various types of meat, with noodles                                                         | 31 | 4   | B | 4 |
| 27162010 | 8000_Mixed | Meat with tomato-based sauce                                                                                        | 31 | 4   | B | 3 |
| 58125120 | 8000_Mixed | Spinach quiche, meatless                                                                                            | 31 | 1.5 | D | 4 |
| 27212150 | 8000_Mixed | Beef goulash with noodles                                                                                           | 31 | 4   | A | 4 |
| 27341000 | 8000_Mixed | Chicken or turkey, potatoes, corn, and cheese, with gravy                                                           | 31 | 4   | B | 4 |
| 58160610 | 8000_Mixed | Rice, white, with dark green vegetables and tomatoes and/or tomato-based sauce, NS as to fat added in cooking       | 31 | 4   | B | 4 |
| 58160630 | 8000_Mixed | Rice, white, with dark green vegetables and tomatoes and/or tomato-based sauce, fat added in cooking                | 31 | 4   | B | 4 |
| 58128120 | 8000_Mixed | Cornmeal dressing with chicken or turkey and vegetables                                                             | 31 | 3   | C | 4 |
| 58130140 | 8000_Mixed | Lasagna with chicken or turkey                                                                                      | 31 | 3.5 | C | 4 |
| 27345410 | 8000_Mixed | Chicken or turkey, rice, and vegetables including carrots, broccoli, and/or dark-green leafy; cream sauce, white sa | 31 | 3.5 | B | 4 |
| 58146333 | 8000_Mixed | Pasta with tomato-based sauce, meat, and added vegetables, ready-to-heat                                            | 31 | 4   | A | 4 |
| 75414013 | 8000_Mixed | Mushrooms, from canned, creamed                                                                                     | 31 | 3.5 | C | 4 |
| 27564502 | 8000_Mixed | Frankfurter or hot dog sandwich, with meatless chili, on whole wheat bun                                            | 31 | 3   | C | 4 |
| 27420460 | 8000_Mixed | Sausage and vegetables, excluding carrots, broccoli, and dark-green leafy; no potatoes, tomato-based sauce          | 31 | 4   | C | 4 |
| 58101725 | 8000_Mixed | Taco or tostada with beans and sour cream                                                                           | 31 | 4.5 | B | 4 |
| 75651020 | 8000_Mixed | Vegetable beef soup, canned, prepared with water, or ready-to-serve                                                 | 31 | 4   | B | 4 |
| 58137250 | 8000_Mixed | Pad Thai with meat                                                                                                  | 31 | 4   | A | 4 |
| 58146323 | 8000_Mixed | Pasta with tomato-based sauce and meat, ready-to-heat                                                               | 31 | 4   | A | 4 |
| 27545010 | 8000_Mixed | Turkey or chicken burger, with condiments, on bun, from fast food / restaurant                                      | 31 | 3.5 | B | 4 |
| 27545200 | 8000_Mixed | Turkey or chicken burger, with condiments, on white bun                                                             | 31 | 3.5 | B | 4 |
| 28311010 | 8000_Mixed | Pepperpot soup                                                                                                      | 31 | 4   | B | 4 |
| 27510252 | 8000_Mixed | Cheeseburger, 1 medium patty, with condiments, on wheat bun                                                         | 31 | 3.5 | C | 4 |
| 27510253 | 8000_Mixed | Cheeseburger, 1 medium patty, with condiments, on whole wheat bun                                                   | 31 | 3.5 | C | 4 |
| 75651030 | 8000_Mixed | Vegetable beef noodle soup, prepared with water                                                                     | 31 | 4   | B | 4 |
| 75651080 | 8000_Mixed | Vegetable beef soup with rice, canned, prepared with water or ready-to-serve                                        | 31 | 4   | B | 4 |
| 14640038 | 8000_Mixed | Cheese sandwich, reduced fat American cheese, on white bread, with mayonnaise                                       | 31 | 2   | D | 4 |
| 58160430 | 8000_Mixed | Rice, white, with peas, NS as to fat added in cooking                                                               | 31 | 4   | A | 4 |
| 58160450 | 8000_Mixed | Rice, white, with peas, fat added in cooking                                                                        | 31 | 4   | A | 4 |
| 27416400 | 8000_Mixed | Stir fried beef and vegetables in soy sauce                                                                         | 31 | 4.5 | A | 4 |
| 58304220 | 8000_Mixed | Rigatoni with meat sauce and cheese, diet frozen meal                                                               | 31 | 4.5 | B | 4 |
| 28110150 | 8000_Mixed | Beef with vegetable, diet frozen meal                                                                               | 31 | 4   | B | 4 |
| 58100535 | 8000_Mixed | Enchilada with meat, green-chile or enchilada sauce                                                                 | 31 | 4   | A | 4 |
| 77230210 | 8000_Mixed | Cassava Pasteles, Puerto Rican style                                                                                | 31 | 3   | D | 4 |
| 27111420 | 8000_Mixed | Chili con carne without beans                                                                                       | 31 | 3   | C | 4 |
| 58147520 | 8000_Mixed | Yat Ga Mein with meat, fish, or poultry                                                                             | 31 | 4   | B | 4 |
| 27345210 | 8000_Mixed | Chicken or turkey, rice, and vegetables including carrots, broccoli, and/or dark-green leafy; gravy                 | 30 | 3.5 | B | 4 |
| 75418100 | 8000_Mixed | Turnips, NS as to form, creamed                                                                                     | 30 | 4   | B | 4 |
| 75418102 | 8000_Mixed | Turnips, from frozen, creamed                                                                                       | 30 | 4   | B | 4 |
| 27564220 | 8000_Mixed | Frankfurter or hot dog sandwich, meat and poultry, plain, on whole grain white bread                                | 30 | 2   | D | 4 |
| 28143130 | 8000_Mixed | Chicken and vegetable entree with noodles, frozen meal                                                              | 30 | 4   | A | 4 |
| 28340750 | 8000_Mixed | Hot and sour soup                                                                                                   | 30 | 3   | C | 4 |
| 58148115 | 8000_Mixed | Macaroni or pasta salad, made with light Italian dressing                                                           | 30 | 4   | A | 4 |
| 74605010 | 8000_Mixed | Tomato rice soup, prepared with water                                                                               | 30 | 4   | C | 4 |
| 75608200 | 8000_Mixed | Onion soup, made from dry mix                                                                                       | 30 | 3   | C | 4 |
| 27335100 | 8000_Mixed | Rabbit stew with potatoes and vegetables                                                                            | 30 | 4.5 | A | 4 |
| 58163130 | 8000_Mixed | Dirty rice                                                                                                          | 30 | 3.5 | B | 4 |
| 27231000 | 8000_Mixed | Lamb or mutton and potatoes with gravy                                                                              | 30 | 4.5 | B | 4 |
| 27416300 | 8000_Mixed | Beef taco filling: beef, cheese, tomato, taco sauce                                                                 | 30 | 3.5 | D | 4 |
| 58160640 | 8000_Mixed | Rice, white, with carrots and dark green vegetables, NS as to fat added in cooking                                  | 30 | 4   | B | 4 |
| 58160660 | 8000_Mixed | Rice, white, with carrots and dark green vegetables, fat added in cooking                                           | 30 | 4   | B | 4 |
| 27564210 | 8000_Mixed | Frankfurter or hot dog sandwich, meat and poultry, plain, on whole wheat bread                                      | 30 | 2   | D | 4 |
| 58146451 | 8000_Mixed | Pasta with cream sauce, seafood, and added vegetables, restaurant                                                   | 30 | 3   | C | 4 |
| 27211110 | 8000_Mixed | Beef stew with potatoes, tomato-based sauce, Mexican style                                                          | 30 | 4   | A | 4 |

Supplementary Table 8. Original (uncorrected) scores for all food items.

|          |            |                                                                                                                         |    |     |   |   |
|----------|------------|-------------------------------------------------------------------------------------------------------------------------|----|-----|---|---|
| 75460900 | 8000_Mixed | Chow mein or chop suey, meatless, with noodles                                                                          | 30 | 4   | C | 4 |
| 58104520 | 8000_Mixed | Chimichanga, meatless                                                                                                   | 30 | 4   | B | 4 |
| 75418101 | 8000_Mixed | Turnips, from fresh, creamed                                                                                            | 30 | 4   | B | 4 |
| 27341050 | 8000_Mixed | Chicken or turkey, potatoes, and vegetables excluding carrots, broccoli, and dark-green leafy; cheese sauce             | 30 | 4   | B | 4 |
| 27430400 | 8000_Mixed | Lamb or mutton stew with vegetables including carrots, broccoli, and/or dark-green leafy; no potatoes, gravy            | 30 | 4.5 | A | 4 |
| 58104270 | 8000_Mixed | Gordita, sope, or chalupa with beans and sour cream                                                                     | 30 | 4   | B | 4 |
| 75603020 | 8000_Mixed | Celery soup, cream of, prepared with water, home recipe, canned or ready-to-serve                                       | 30 | 4   | B | 4 |
| 58104190 | 8000_Mixed | Nachos with chicken, cheese, and sour cream                                                                             | 30 | 3.5 | B | 4 |
| 58115210 | 8000_Mixed | Taco with crab meat, Puerto Rican style                                                                                 | 30 | 3   | D | 4 |
| 27221110 | 8000_Mixed | Stuffed pork roast, Puerto Rican style                                                                                  | 30 | 4   | B | 4 |
| 71801100 | 8000_Mixed | Potato and cheese soup                                                                                                  | 30 | 4   | B | 4 |
| 28143190 | 8000_Mixed | Chicken in mushroom sauce, white and wild rice, vegetable, frozen meal                                                  | 30 | 4   | B | 4 |
| 58148180 | 8000_Mixed | Macaroni or pasta salad with cheese                                                                                     | 30 | 3   | C | 4 |
| 75411010 | 8000_Mixed | Corn, scalloped or pudding                                                                                              | 30 | 4   | B | 4 |
| 27218310 | 8000_Mixed | Stewed corned beef, Puerto Rican style                                                                                  | 30 | 4   | C | 4 |
| 58100330 | 8000_Mixed | Burrito with beans, rice, and sour cream, meatless                                                                      | 30 | 3.5 | C | 4 |
| 75400500 | 8000_Mixed | Artichokes, stuffed                                                                                                     | 30 | 4   | A | 4 |
| 14640026 | 8000_Mixed | Cheese sandwich, American cheese, on white bread, with mayonnaise                                                       | 30 | 1.5 | D | 4 |
| 27363100 | 8000_Mixed | Jambalaya with meat and rice                                                                                            | 30 | 3.5 | C | 4 |
| 27570310 | 8000_Mixed | Hors d'oeuvres, with spread                                                                                             | 30 | 3.5 | A | 4 |
| 58149110 | 8000_Mixed | Noodle pudding                                                                                                          | 30 | 3.5 | B | 4 |
| 58130020 | 8000_Mixed | Lasagna with meat and spinach                                                                                           | 30 | 3   | C | 4 |
| 27564290 | 8000_Mixed | Frankfurter or hot dog sandwich, chicken and/or turkey, plain, on multigrain bread                                      | 30 | 3.5 | C | 4 |
| 75414010 | 8000_Mixed | Mushrooms, NS as to form, creamed                                                                                       | 30 | 3.5 | C | 4 |
| 58106830 | 8000_Mixed | Pizza with beans and vegetables, thick crust                                                                            | 30 | 3   | B | 4 |
| 27332110 | 8000_Mixed | Veal stew with potatoes and vegetables excluding carrots, broccoli, and/or dark-green leafy; tomato-based sauce         | 30 | 4.5 | A | 4 |
| 28315150 | 8000_Mixed | Meat and corn hominy soup, home recipe, Mexican style                                                                   | 30 | 4   | B | 4 |
| 27422010 | 8000_Mixed | Pork chop stewed with vegetables, Puerto Rican style                                                                    | 30 | 4.5 | A | 4 |
| 75611010 | 8000_Mixed | Vegetable soup, cream of, prepared with milk                                                                            | 30 | 3   | C | 4 |
| 27320025 | 8000_Mixed | Ham or pork, noodles and vegetables excluding carrots, broccoli, and dark-green leafy; no sauce                         | 30 | 3.5 | A | 4 |
| 27510342 | 8000_Mixed | Bacon cheeseburger, 1 medium patty, with condiments, on wheat bun                                                       | 30 | 2   | D | 4 |
| 27510343 | 8000_Mixed | Bacon cheeseburger, 1 medium patty, with condiments, on whole wheat bun                                                 | 30 | 2   | D | 4 |
| 58304250 | 8000_Mixed | Manicotti, cheese-filled, with tomato sauce, diet frozen meal                                                           | 30 | 4   | B | 4 |
| 27360000 | 8000_Mixed | Stew, NFS                                                                                                               | 30 | 4.5 | B | 4 |
| 27135020 | 8000_Mixed | Veal scallopini                                                                                                         | 29 | 3.5 | C | 4 |
| 27350020 | 8000_Mixed | Paella with seafood                                                                                                     | 29 | 3.5 | B | 4 |
| 28340120 | 8000_Mixed | Chicken or turkey broth, without tomato, home recipe                                                                    | 29 | 3.5 | B | 4 |
| 27564002 | 8000_Mixed | Frankfurter or hot dog sandwich, NFS, plain, on whole wheat bun                                                         | 29 | 2   | D | 4 |
| 27564062 | 8000_Mixed | Frankfurter or hot dog sandwich, beef, plain, on whole wheat bun                                                        | 29 | 2   | D | 4 |
| 58404050 | 8000_Mixed | Chicken or turkey rice soup, reduced sodium, canned, prepared with milk                                                 | 29 | 3.5 | B | 4 |
| 75411031 | 8000_Mixed | Corn, cooked, from fresh, with cream sauce, made with milk                                                              | 29 | 4   | B | 4 |
| 27350070 | 8000_Mixed | Tuna pot pie                                                                                                            | 29 | 3.5 | B | 4 |
| 27220110 | 8000_Mixed | Pork and rice with tomato-based sauce                                                                                   | 29 | 3.5 | B | 4 |
| 58101615 | 8000_Mixed | Soft taco with beans and sour cream                                                                                     | 29 | 4   | B | 4 |
| 58109015 | 8000_Mixed | Pizza, cheese, whole wheat thin crust                                                                                   | 29 | 3.5 | C | 4 |
| 27311310 | 8000_Mixed | Beef stew with potatoes and vegetables including carrots, broccoli, and/or dark-green leafy; tomato-based sauce         | 29 | 4.5 | B | 4 |
| 27313010 | 8000_Mixed | Beef, noodles, and vegetables including carrots, broccoli, and/or dark-green leafy; no sauce                            | 29 | 3.5 | A | 4 |
| 27243100 | 8000_Mixed | Biryani with chicken                                                                                                    | 29 | 4.5 | A | 4 |
| 75460710 | 8000_Mixed | Vegetable combinations, excluding carrots, broccoli, and dark-green leafy; cooked, with pasta                           | 29 | 4.5 | A | 4 |
| 27111440 | 8000_Mixed | Chili con carne with beans and cheese                                                                                   | 29 | 4.5 | B | 4 |
| 58160480 | 8000_Mixed | Rice, white, with carrots, fat added in cooking                                                                         | 29 | 4   | B | 4 |
| 58101950 | 8000_Mixed | Taco or tostada salad with chicken and sour cream                                                                       | 29 | 4   | B | 4 |
| 27111430 | 8000_Mixed | Chili con carne, NS as to beans, with cheese                                                                            | 29 | 4.5 | B | 4 |
| 58160460 | 8000_Mixed | Rice, white, with carrots, NS as to fat added in cooking                                                                | 29 | 4   | B | 4 |
| 75411030 | 8000_Mixed | Corn, cooked, NS as to form, with cream sauce, made with milk                                                           | 29 | 4   | B | 4 |
| 75411032 | 8000_Mixed | Corn, cooked, from frozen, with cream sauce, made with milk                                                             | 29 | 4   | B | 4 |
| 27347240 | 8000_Mixed | Chicken or turkey, dumplings, and vegetables including carrots, broccoli, and/or dark green leafy; gravy                | 29 | 3.5 | B | 4 |
| 58160670 | 8000_Mixed | Rice, white, with carrots, dark green vegetables, and tomatoes and/or tomato-based sauce, NS as to fat added in cooking | 29 | 4   | B | 4 |
| 58160690 | 8000_Mixed | Rice, white, with carrots, dark green vegetables, and tomatoes and/or tomato-based sauce, fat added in cooking          | 29 | 4   | B | 4 |
| 27345020 | 8000_Mixed | Chicken or turkey, rice, and vegetables excluding carrots, broccoli, and dark-green leafy; no sauce                     | 29 | 3.5 | A | 4 |
| 27211500 | 8000_Mixed | Beef and potatoes with cheese sauce                                                                                     | 29 | 4   | B | 4 |
| 27320310 | 8000_Mixed | Pork chow mein or chop suey with noodles                                                                                | 29 | 4   | B | 4 |
| 27332100 | 8000_Mixed | Veal stew with potatoes and vegetables including carrots, broccoli, and/or dark-green leafy; tomato-based sauce         | 29 | 4.5 | A | 4 |
| 58121610 | 8000_Mixed | Dumpling, potato- or cheese-filled                                                                                      | 29 | 3.5 | C | 4 |
| 75604010 | 8000_Mixed | Corn soup, cream of, prepared with milk                                                                                 | 29 | 4   | B | 4 |
| 74601000 | 8000_Mixed | Tomato soup, NFS                                                                                                        | 29 | 4   | B | 4 |
| 27250830 | 8000_Mixed | Fish and rice with mushroom sauce                                                                                       | 29 | 3.5 | B | 4 |
| 58306100 | 8000_Mixed | Chicken enchilada, diet frozen meal                                                                                     | 29 | 3.5 | B | 4 |
| 58160520 | 8000_Mixed | Rice, white, with tomatoes and/or tomato-based sauce, NS as to fat added in cooking                                     | 29 | 4   | B | 4 |
| 58160540 | 8000_Mixed | Rice, white, with tomatoes and/or tomato-based sauce, fat added in cooking                                              | 29 | 4   | B | 4 |
| 27221150 | 8000_Mixed | Pork stew, with potatoes, tomato-based sauce, Mexican style                                                             | 29 | 3.5 | B | 4 |
| 27213100 | 8000_Mixed | Beef and rice with tomato-based sauce                                                                                   | 29 | 3.5 | B | 4 |
| 58106736 | 8000_Mixed | Pizza with extra meat and extra vegetables, thin crust                                                                  | 29 | 2   | D | 4 |
| 27540330 | 8000_Mixed | Turkey sandwich, with gravy                                                                                             | 29 | 4   | B | 4 |
| 58101930 | 8000_Mixed | Taco or tostada salad with meat                                                                                         | 29 | 4   | A | 4 |
| 27418410 | 8000_Mixed | Beef steak with onions, Puerto Rican style                                                                              | 29 | 1.5 | E | 4 |
| 27540280 | 8000_Mixed | Chicken fillet, broiled, sandwich with cheese, on bun, with lettuce, tomato and spread                                  | 29 | 4   | A | 4 |
| 58306200 | 8000_Mixed | Chicken fajitas, diet frozen meal                                                                                       | 29 | 4   | A | 4 |
| 14640044 | 8000_Mixed | Cheese sandwich, reduced fat Cheddar cheese, on white bread, with mayonnaise                                            | 29 | 2   | D | 4 |
| 28154010 | 8000_Mixed | Shrimp and vegetables in sauce with noodles, diet frozen meal                                                           | 29 | 4   | B | 4 |
| 27120060 | 8000_Mixed | Sweet and sour pork                                                                                                     | 29 | 3   | C | 4 |
| 27443110 | 8000_Mixed | Chicken or turkey a la king with vegetables including carrots, broccoli, and/or dark-green leafy; no potatoes, cream    | 28 | 3   | C | 4 |
| 27564470 | 8000_Mixed | Frankfurter or hot dog sandwich, with chili, on whole wheat bread                                                       | 28 | 3.5 | C | 4 |
| 27564530 | 8000_Mixed | Frankfurter or hot dog sandwich, with meatless chili, on whole wheat bread                                              | 28 | 3.5 | C | 4 |
| 27313310 | 8000_Mixed | Beef, noodles, and vegetables including carrots, broccoli, and/or dark-green leafy; mushroom sauce                      | 28 | 3.5 | B | 4 |
| 58106345 | 8000_Mixed | Pizza with cheese and extra vegetables, thin crust                                                                      | 28 | 3   | C | 4 |

Supplementary Table 8. Original (uncorrected) scores for all food items.

|          |            |                                                                                                                     |    |     |   |   |
|----------|------------|---------------------------------------------------------------------------------------------------------------------|----|-----|---|---|
| 58160580 | 8000_Mixed | Rice, white, with carrots and tomatoes and/or tomato-based sauce, NS as to fat added in cooking                     | 28 | 4   | B | 4 |
| 58160600 | 8000_Mixed | Rice, white, with carrots and tomatoes and/or tomato-based sauce, fat added in cooking                              | 28 | 4   | B | 4 |
| 75607100 | 8000_Mixed | Mushroom soup, cream of, canned, reduced sodium, prepared with milk                                                 | 28 | 3.5 | B | 4 |
| 58106300 | 8000_Mixed | Pizza, cheese, with vegetables, from frozen, thin crust                                                             | 28 | 3.5 | B | 4 |
| 28310150 | 8000_Mixed | Oxtail soup                                                                                                         | 28 | 3.5 | A | 4 |
| 27564540 | 8000_Mixed | Frankfurter or hot dog sandwich, with meatless chili, on whole grain white bread                                    | 28 | 3   | C | 4 |
| 27114000 | 8000_Mixed | Beef with mushroom sauce                                                                                            | 28 | 4   | B | 3 |
| 58156410 | 8000_Mixed | Rice with onions, Puerto Rican style                                                                                | 28 | 4   | C | 4 |
| 27540360 | 8000_Mixed | Turkey and bacon submarine sandwich, with lettuce, tomato and spread                                                | 28 | 3.5 | B | 4 |
| 58111130 | 8000_Mixed | Wonton, fried, filled with meat, poultry, or seafood, and vegetable                                                 | 28 | 3   | B | 4 |
| 27540170 | 8000_Mixed | Chicken patty sandwich, miniature, with spread                                                                      | 28 | 3   | D | 4 |
| 58111110 | 8000_Mixed | Wonton, fried, filled with meat, poultry, or seafood,                                                               | 28 | 3   | B | 4 |
| 28310110 | 8000_Mixed | Beef, broth, bouillon, or consommé                                                                                  | 28 | 3   | C | 4 |
| 28360100 | 8000_Mixed | Meat broth, Puerto Rican style                                                                                      | 28 | 3   | C | 4 |
| 58130016 | 8000_Mixed | Lasagna with meat, frozen                                                                                           | 28 | 4   | B | 4 |
| 27510242 | 8000_Mixed | Cheeseburger, 1 medium patty, plain, on wheat bun                                                                   | 28 | 2   | D | 4 |
| 27510243 | 8000_Mixed | Cheeseburger, 1 medium patty, plain, on whole wheat bun                                                             | 28 | 2   | D | 4 |
| 27510196 | 8000_Mixed | Cheeseburger, 1 small patty, plain, on wheat bun                                                                    | 28 | 2   | D | 4 |
| 28345160 | 8000_Mixed | Chicken or turkey mushroom soup, cream of, prepared with milk                                                       | 28 | 3.5 | B | 4 |
| 75607080 | 8000_Mixed | Mushroom with chicken soup, cream of, prepared with milk                                                            | 28 | 3.5 | B | 4 |
| 27421010 | 8000_Mixed | Stuffed christophine, Puerto Rican style                                                                            | 28 | 4.5 | B | 4 |
| 58130011 | 8000_Mixed | Lasagna with meat                                                                                                   | 28 | 4   | B | 4 |
| 27345420 | 8000_Mixed | Chicken or turkey, rice, and vegetables excluding carrots, broccoli, and dark-green leafy; cream sauce, white sauce | 28 | 3.5 | B | 4 |
| 27347230 | 8000_Mixed | Chicken or turkey, stuffing, and vegetables excluding carrots, broccoli, and dark-green leafy; gravy                | 28 | 3.5 | B | 4 |
| 28145100 | 8000_Mixed | Turkey with gravy, dressing, vegetable and fruit, diet frozen meal                                                  | 28 | 4.5 | A | 4 |
| 27345220 | 8000_Mixed | Chicken or turkey, rice, and vegetables excluding carrots, broccoli, and dark-green leafy; gravy                    | 28 | 3.5 | B | 4 |
| 28340110 | 8000_Mixed | Chicken or turkey broth, bouillon, or consommé                                                                      | 28 | 3   | C | 4 |
| 73501010 | 8000_Mixed | Carrot with rice soup, cream of, prepared with milk, home recipe, canned or ready-to-serve                          | 28 | 4   | B | 4 |
| 58104160 | 8000_Mixed | Nachos with chili                                                                                                   | 28 | 3.5 | C | 4 |
| 58104540 | 8000_Mixed | Chimichanga, meatless, with sour cream                                                                              | 28 | 3.5 | B | 4 |
| 58128220 | 8000_Mixed | Dressing with chicken or turkey and vegetables                                                                      | 28 | 3   | C | 4 |
| 27430410 | 8000_Mixed | Lamb or mutton stew with vegetables excluding carrots, broccoli, and dark-green leafy; no potatoes, gravy           | 28 | 4   | A | 4 |
| 27212120 | 8000_Mixed | Chili con carne with beans and macaroni                                                                             | 28 | 4   | A | 4 |
| 58402030 | 8000_Mixed | Beef rice soup, home recipe, canned or ready-to-serve                                                               | 28 | 4.5 | B | 4 |
| 74602010 | 8000_Mixed | Tomato soup, prepared with water, or ready-to-serve                                                                 | 28 | 4   | B | 4 |
| 74606010 | 8000_Mixed | Tomato vegetable soup, prepared with water                                                                          | 28 | 4   | B | 4 |
| 27211550 | 8000_Mixed | Stewed, seasoned, ground beef with potatoes, Mexican style                                                          | 28 | 4   | A | 4 |
| 58100630 | 8000_Mixed | Enchilada with chicken, red-chile or enchilada sauce                                                                | 28 | 4   | A | 4 |
| 27242200 | 8000_Mixed | Chicken or turkey and noodles with gravy                                                                            | 28 | 3.5 | B | 4 |
| 27540285 | 8000_Mixed | Chicken, bacon, and tomato club sandwich, with lettuce and spread                                                   | 28 | 3.5 | D | 4 |
| 58134710 | 8000_Mixed | Tortellini, spinach-filled, with tomato sauce                                                                       | 28 | 3   | C | 4 |
| 27540110 | 8000_Mixed | Chicken sandwich, with spread                                                                                       | 28 | 4   | B | 4 |
| 58303100 | 8000_Mixed | Rice, with broccoli, cheese sauce, frozen side dish                                                                 | 28 | 4   | B | 4 |
| 27520135 | 8000_Mixed | Bacon, chicken, and tomato club sandwich, with cheese, lettuce and spread                                           | 28 | 3.5 | D | 4 |
| 27242250 | 8000_Mixed | Chicken or turkey and noodles with mushroom sauce                                                                   | 28 | 3.5 | B | 4 |
| 28360210 | 8000_Mixed | Spanish vegetable soup, Puerto Rican style                                                                          | 28 | 4   | C | 4 |
| 58421010 | 8000_Mixed | Sopa Seca de Fideo, Mexican style, made with dry noodles, home recipe                                               | 28 | 4   | C | 4 |
| 75656060 | 8000_Mixed | Vegetable beef soup, chunky style                                                                                   | 28 | 4.5 | B | 4 |
| 27320090 | 8000_Mixed | Sausage, noodles, and vegetables including carrots, broccoli, and/or dark-green leafy; tomato-based sauce           | 28 | 4   | B | 4 |
| 27564030 | 8000_Mixed | Frankfurter or hot dog sandwich, NFS, plain, on whole wheat bread                                                   | 27 | 2   | D | 4 |
| 27564090 | 8000_Mixed | Frankfurter or hot dog sandwich, beef, plain, on whole wheat bread                                                  | 27 | 2   | D | 4 |
| 58402020 | 8000_Mixed | Beef dumpling soup, home recipe, canned or ready-to-serve                                                           | 27 | 4.5 | B | 4 |
| 58146441 | 8000_Mixed | Pasta with cream sauce and seafood, restaurant                                                                      | 27 | 3.5 | D | 4 |
| 27211190 | 8000_Mixed | Beef and potatoes with cream sauce, white sauce or mushroom sauce                                                   | 27 | 3.5 | B | 4 |
| 27564480 | 8000_Mixed | Frankfurter or hot dog sandwich, with chili, on whole grain white bread                                             | 27 | 3.5 | C | 4 |
| 58104130 | 8000_Mixed | Nachos with meat and cheese                                                                                         | 27 | 3.5 | B | 4 |
| 27313410 | 8000_Mixed | Beef, noodles, and vegetables including carrots, broccoli, and/or dark-green leafy; gravy                           | 27 | 3.5 | B | 4 |
| 58100800 | 8000_Mixed | Enchilada, just cheese, meatless, no beans, red-chile or enchilada sauce                                            | 27 | 3.5 | C | 4 |
| 27313020 | 8000_Mixed | Beef, noodles, and vegetables excluding carrots, broccoli, and dark-green leafy; no sauce                           | 27 | 3.5 | A | 4 |
| 75607050 | 8000_Mixed | Mushroom soup, cream of, low sodium, prepared with water                                                            | 27 | 4.5 | B | 4 |
| 71851010 | 8000_Mixed | Plantain soup, Puerto Rican style                                                                                   | 27 | 4   | C | 4 |
| 58160490 | 8000_Mixed | Rice, white, with peas and carrots, NS as to fat added in cooking                                                   | 27 | 4   | B | 4 |
| 58160510 | 8000_Mixed | Rice, white, with peas and carrots, fat added in cooking                                                            | 27 | 4   | B | 4 |
| 27120130 | 8000_Mixed | Pork stew, no potatoes, tomato-based sauce, Mexican style                                                           | 27 | 4   | B | 4 |
| 27540190 | 8000_Mixed | Chicken patty sandwich, with lettuce and spread                                                                     | 27 | 3   | C | 4 |
| 75600150 | 8000_Mixed | Soup, cream of, NFS                                                                                                 | 27 | 3.5 | B | 4 |
| 75414020 | 8000_Mixed | Mushrooms, stuffed                                                                                                  | 27 | 4   | D | 4 |
| 27135050 | 8000_Mixed | Veal Marsala                                                                                                        | 27 | 4   | B | 4 |
| 27111300 | 8000_Mixed | Beef stew, no potatoes, tomato-based sauce, Mexican style                                                           | 27 | 4   | B | 4 |
| 75608010 | 8000_Mixed | Onion soup, cream of, prepared with milk                                                                            | 27 | 3   | C | 4 |
| 55703000 | 8000_Mixed | Cake made with glutinous rice and dried beans                                                                       | 27 | 3   | C | 3 |
| 27315250 | 8000_Mixed | Stuffed cabbage rolls with beef and rice                                                                            | 27 | 4.5 | A | 4 |
| 58146332 | 8000_Mixed | Pasta with tomato-based sauce, meat, and added vegetables, home recipe                                              | 27 | 4   | A | 4 |
| 27545000 | 8000_Mixed | Turkey or chicken burger, plain, on bun, from fast food / restaurant                                                | 27 | 4   | B | 4 |
| 27545100 | 8000_Mixed | Turkey or chicken burger, plain, on white bun                                                                       | 27 | 4   | B | 4 |
| 27564040 | 8000_Mixed | Frankfurter or hot dog sandwich, NFS, plain, on whole grain white bread                                             | 27 | 2   | D | 4 |
| 27564100 | 8000_Mixed | Frankfurter or hot dog sandwich, beef, plain, on whole grain white bread                                            | 27 | 2   | D | 4 |
| 28331110 | 8000_Mixed | Lamb, pasta, and vegetable soup, Puerto Rican style                                                                 | 27 | 4   | C | 4 |
| 58130015 | 8000_Mixed | Lasagna with meat, home recipe                                                                                      | 27 | 3.5 | C | 4 |
| 58106737 | 8000_Mixed | Pizza with extra meat and extra vegetables, thick crust                                                             | 27 | 3.5 | C | 4 |
| 58146210 | 8000_Mixed | Pasta with sauce, NFS                                                                                               | 27 | 4   | A | 4 |
| 58146322 | 8000_Mixed | Pasta with tomato-based sauce and meat, home recipe                                                                 | 27 | 4   | A | 4 |
| 27520160 | 8000_Mixed | Bacon, chicken, and tomato club sandwich, on multigrain roll with lettuce and spread                                | 27 | 3.5 | C | 4 |
| 27135110 | 8000_Mixed | Veal parmigiana                                                                                                     | 27 | 3.5 | C | 4 |
| 27564170 | 8000_Mixed | Frankfurter or hot dog sandwich, beef and pork, plain, on multigrain bread                                          | 27 | 2   | D | 4 |
| 27330060 | 8000_Mixed | Lamb or mutton, rice, and vegetables including carrots, broccoli, and/or dark-green leafy; tomato-based sauce       | 27 | 4   | B | 4 |

Supplementary Table 8. Original (uncorrected) scores for all food items.

|          |            |                                                                                                                    |    |     |   |   |
|----------|------------|--------------------------------------------------------------------------------------------------------------------|----|-----|---|---|
| 28145610 | 8000_Mixed | Turkey with gravy, dressing, potatoes, vegetable, dessert, frozen meal                                             | 27 | 4   | B | 4 |
| 73305010 | 8000_Mixed | Squash, winter, baked with cheese                                                                                  | 27 | 4   | B | 4 |
| 28140150 | 8000_Mixed | Chicken divan, frozen meal                                                                                         | 27 | 3.5 | B | 4 |
| 58133140 | 8000_Mixed | Manicotti, vegetable- and cheese-filled, with tomato sauce, meatless                                               | 27 | 3.5 | B | 4 |
| 27311635 | 8000_Mixed | Beef, potatoes, and vegetables including carrots, broccoli, and/or dark-green leafy; cheese sauce                  | 27 | 4   | B | 4 |
| 58115110 | 8000_Mixed | Tamale casserole, Puerto Rican style                                                                               | 27 | 4   | B | 4 |
| 58122210 | 8000_Mixed | Gnocchi, cheese                                                                                                    | 27 | 3   | C | 4 |
| 27510676 | 8000_Mixed | Double hamburger, 2 medium patties, with condiments, on bun, from fast food / restaurant                           | 27 | 3.5 | C | 4 |
| 27510681 | 8000_Mixed | Double hamburger, 2 medium patties, with condiments, on bun, from fast food / restaurant (Burger King Double \     | 27 | 3.5 | C | 4 |
| 27510682 | 8000_Mixed | Double hamburger, 2 medium patties, with condiments, on bun, from fast food / restaurant (Wendy's 1/2 lb Dou       | 27 | 3.5 | C | 4 |
| 27112000 | 8000_Mixed | Beef with gravy                                                                                                    | 27 | 4   | B | 3 |
| 27163010 | 8000_Mixed | Meat with gravy, NS as to type of meat,                                                                            | 27 | 4   | B | 3 |
| 28110660 | 8000_Mixed | Meatballs, Swedish, in gravy, with noodles, diet frozen meal                                                       | 27 | 4   | A | 4 |
| 27313320 | 8000_Mixed | Beef, noodles, and vegetables excluding carrots, broccoli, and dark-green leafy; mushroom sauce                    | 27 | 3.5 | B | 4 |
| 58135120 | 8000_Mixed | Chow fun noodles with vegetables, meatless                                                                         | 27 | 4.5 | B | 3 |
| 58402010 | 8000_Mixed | Beef noodle soup, canned or ready-to-serve                                                                         | 26 | 4   | B | 4 |
| 58145120 | 8000_Mixed | Macaroni or noodles with cheese and tuna                                                                           | 26 | 3.5 | B | 4 |
| 58101735 | 8000_Mixed | Taco or tostada with chicken and beans                                                                             | 26 | 4   | A | 4 |
| 58106720 | 8000_Mixed | Pizza with meat and vegetables, from restaurant or fast food, thin crust                                           | 26 | 2   | D | 4 |
| 75609010 | 8000_Mixed | Pea soup, prepared with milk                                                                                       | 26 | 3.5 | B | 4 |
| 74601010 | 8000_Mixed | Tomato soup, cream of, prepared with milk                                                                          | 26 | 3.5 | B | 4 |
| 75605010 | 8000_Mixed | Leek soup, cream of, prepared with milk                                                                            | 26 | 3   | C | 4 |
| 27135010 | 8000_Mixed | Veal with gravy                                                                                                    | 26 | 4   | B | 3 |
| 27564550 | 8000_Mixed | Frankfurter or hot dog sandwich, with meatless chili, on multigrain bread                                          | 26 | 3.5 | C | 4 |
| 74604500 | 8000_Mixed | Tomato noodle soup, canned, prepared with water or ready-to-serve                                                  | 26 | 4   | B | 4 |
| 27246200 | 8000_Mixed | Chicken or turkey with stuffing                                                                                    | 26 | 4   | C | 4 |
| 27261500 | 8000_Mixed | Stewed, seasoned, ground beef and pork with potatoes, Mexican style                                                | 26 | 4   | B | 4 |
| 27443120 | 8000_Mixed | Chicken or turkey a la king with vegetables excluding carrots, broccoli, and dark-green leafy; no potatoes, cream, | 26 | 3   | D | 4 |
| 58100220 | 8000_Mixed | Burrito with chicken and beans                                                                                     | 26 | 3.5 | C | 4 |
| 27313420 | 8000_Mixed | Beef, noodles, and vegetables excluding carrots, broccoli, and dark-green leafy; gravy                             | 26 | 3.5 | B | 4 |
| 27148010 | 8000_Mixed | Stuffed chicken, drumstick or breast, Puerto Rican style                                                           | 26 | 2   | D | 4 |
| 27564230 | 8000_Mixed | Frankfurter or hot dog sandwich, meat and poultry, plain, on multigrain bread                                      | 26 | 2   | D | 4 |
| 27118110 | 8000_Mixed | Meatballs, Puerto Rican style                                                                                      | 26 | 2   | D | 4 |
| 58101945 | 8000_Mixed | Taco or tostada salad with meat and sour cream                                                                     | 26 | 4   | B | 4 |
| 27116400 | 8000_Mixed | Steak tartare                                                                                                      | 26 | 3.5 | C | 4 |
| 27320080 | 8000_Mixed | Sausage, noodles, and vegetables excluding carrots, broccoli, and dark-green leafy; tomato-based sauce             | 26 | 4   | B | 4 |
| 28340640 | 8000_Mixed | Chicken or turkey vegetable soup with noodles, stew type, chunky style, canned or ready-to-serve                   | 26 | 4.5 | B | 4 |
| 58306070 | 8000_Mixed | Cheese enchilada, frozen meal                                                                                      | 26 | 3.5 | C | 4 |
| 58106350 | 8000_Mixed | Pizza with cheese and extra vegetables, thick crust                                                                | 26 | 3   | B | 4 |
| 58163410 | 8000_Mixed | Spanish rice, fat added in cooking                                                                                 | 26 | 4   | B | 4 |
| 27347250 | 8000_Mixed | Chicken or turkey, dumplings, and vegetables excluding carrots, broccoli, and dark green leafy; gravy              | 26 | 3.5 | B | 4 |
| 28340610 | 8000_Mixed | Chicken or turkey vegetable soup, stew type                                                                        | 26 | 4.5 | B | 4 |
| 32301100 | 8000_Mixed | Garlic egg soup, Puerto Rican style                                                                                | 26 | 3   | C | 4 |
| 27541001 | 8000_Mixed | Turkey, ham, and roast beef club sandwich with cheese, lettuce, tomato, and spread                                 | 26 | 4   | A | 4 |
| 27146250 | 8000_Mixed | Chicken or turkey cordon bleu                                                                                      | 26 | 3.5 | D | 4 |
| 58155510 | 8000_Mixed | Soupy rice mixture with chicken and potatoes, Puerto Rican style                                                   | 26 | 4   | B | 4 |
| 27243300 | 8000_Mixed | Chicken or turkey and rice with cream sauce                                                                        | 26 | 3.5 | B | 4 |
| 27113200 | 8000_Mixed | Creamed chipped or dried beef                                                                                      | 26 | 3   | C | 4 |
| 27520340 | 8000_Mixed | Ham salad sandwich                                                                                                 | 26 | 3   | C | 4 |
| 58106320 | 8000_Mixed | Pizza, cheese, with vegetables, from restaurant or fast food, thin crust                                           | 26 | 2   | D | 4 |
| 27115100 | 8000_Mixed | Steak teriyaki                                                                                                     | 26 | 3.5 | C | 3 |
| 27146350 | 8000_Mixed | Orange chicken                                                                                                     | 26 | 2   | D | 4 |
| 58148111 | 8000_Mixed | Macaroni or pasta salad, made with light mayonnaise                                                                | 25 | 3.5 | B | 4 |
| 58148113 | 8000_Mixed | Macaroni or pasta salad, made with light mayonnaise-type salad dressing                                            | 25 | 3.5 | B | 4 |
| 58163430 | 8000_Mixed | Spanish rice, NS as to fat added in cooking                                                                        | 25 | 4   | B | 4 |
| 41602050 | 8000_Mixed | Split pea soup                                                                                                     | 25 | 4.5 | A | 4 |
| 27510950 | 8000_Mixed | Reuben sandwich, corned beef sandwich with sauerkraut and cheese, with spread                                      | 25 | 2   | D | 4 |
| 27564490 | 8000_Mixed | Frankfurter or hot dog sandwich, with chili, on multigrain bread                                                   | 25 | 3.5 | C | 4 |
| 58101540 | 8000_Mixed | Taco or tostada with fish                                                                                          | 25 | 3   | C | 4 |
| 58100255 | 8000_Mixed | Burrito with chicken, beans, and rice                                                                              | 25 | 3   | C | 4 |
| 27315310 | 8000_Mixed | Beef, rice, and vegetables including carrots, broccoli, and/or dark-green leafy; mushroom sauce                    | 25 | 3.5 | B | 4 |
| 71803010 | 8000_Mixed | Potato chowder                                                                                                     | 25 | 3   | C | 4 |
| 27320500 | 8000_Mixed | Sweet and sour pork with rice                                                                                      | 25 | 3.5 | B | 4 |
| 58101625 | 8000_Mixed | Soft taco with chicken and beans                                                                                   | 25 | 4   | B | 4 |
| 58106250 | 8000_Mixed | Pizza, extra cheese, thin crust                                                                                    | 25 | 2   | D | 4 |
| 58104835 | 8000_Mixed | Taquito or flauta with chicken and cheese                                                                          | 25 | 3.5 | B | 4 |
| 27116300 | 8000_Mixed | Beef with sweet and sour sauce                                                                                     | 25 | 3.5 | B | 4 |
| 58140110 | 8000_Mixed | Spaghetti with corned beef, Puerto Rican style                                                                     | 25 | 3.5 | C | 4 |
| 58100245 | 8000_Mixed | Burrito with chicken, beans, and sour cream                                                                        | 25 | 3.5 | C | 4 |
| 58106358 | 8000_Mixed | Pizza, cheese, with fruit, thin crust                                                                              | 25 | 2   | D | 4 |
| 27118120 | 8000_Mixed | Stewed seasoned ground beef, Puerto Rican style                                                                    | 25 | 3   | D | 4 |
| 58301030 | 8000_Mixed | Veal lasagna, diet frozen meal                                                                                     | 25 | 4   | B | 4 |
| 58136160 | 8000_Mixed | Lo mein, with chicken                                                                                              | 25 | 3.5 | A | 4 |
| 58101730 | 8000_Mixed | Taco or tostada with meat and beans                                                                                | 25 | 4   | C | 4 |
| 14640032 | 8000_Mixed | Cheese sandwich, Cheddar cheese, on white bread, with mayonnaise                                                   | 25 | 1.5 | D | 4 |
| 58104830 | 8000_Mixed | Taquito or flauta with chicken                                                                                     | 25 | 3.5 | B | 4 |
| 58157310 | 8000_Mixed | Congee, with meat, poultry, and/or seafood, and vegetables                                                         | 25 | 3.5 | B | 4 |
| 58128110 | 8000_Mixed | Chicken cornbread                                                                                                  | 25 | 3.5 | C | 4 |
| 27516010 | 8000_Mixed | Gyro sandwich (pita bread, beef, lamb, onion, condiments), with tomato and spread                                  | 25 | 4   | A | 4 |
| 27220050 | 8000_Mixed | Ham or pork with stuffing                                                                                          | 25 | 3.5 | B | 4 |
| 71801010 | 8000_Mixed | Potato soup, cream of, prepared with milk                                                                          | 25 | 3   | C | 4 |
| 58155410 | 8000_Mixed | Soupy rice with chicken, Puerto Rican style                                                                        | 25 | 3.5 | C | 4 |
| 58148112 | 8000_Mixed | Macaroni or pasta salad, made with mayonnaise-type salad dressing                                                  | 25 | 3.5 | B | 4 |
| 58106220 | 8000_Mixed | Pizza, cheese, from restaurant or fast food, thin crust                                                            | 25 | 2   | D | 4 |
| 58131600 | 8000_Mixed | Ravioli, cheese and spinach-filled, with cream sauce                                                               | 25 | 3   | C | 4 |
| 27315410 | 8000_Mixed | Beef, rice, and vegetables including carrots, broccoli, and/or dark-green leafy; gravy                             | 25 | 3.5 | B | 4 |



Supplementary Table 8. Original (uncorrected) scores for all food items.

|          |            |                                                                                                                    |    |     |   |   |
|----------|------------|--------------------------------------------------------------------------------------------------------------------|----|-----|---|---|
| 58134160 | 8000_Mixed | Stuffed shells, cheese- and spinach- filled, no sauce                                                              | 25 | 3.5 | C | 4 |
| 58106738 | 8000_Mixed | Pizza with extra meat and extra vegetables, medium crust                                                           | 25 | 3.5 | C | 4 |
| 58106660 | 8000_Mixed | Pizza with extra meat, thick crust                                                                                 | 25 | 2   | D | 4 |
| 75607060 | 8000_Mixed | Mushroom soup, cream of, NS as to made with milk or water                                                          | 25 | 3   | C | 4 |
| 58201015 | 8000_Mixed | Jelly sandwich, regular jelly, on wheat bread                                                                      | 25 | 3   | C | 4 |
| 58201025 | 8000_Mixed | Jelly sandwich, regular jelly, on whole wheat bread                                                                | 25 | 3   | C | 4 |
| 58151210 | 8000_Mixed | Sushi roll, shrimp                                                                                                 | 25 | 3.5 | B | 3 |
| 27345230 | 8000_Mixed | Chicken or turkey, rice, corn, and cheese, with gravy                                                              | 25 | 3.5 | C | 4 |
| 58303200 | 8000_Mixed | Rice, with green beans, water chestnuts, in sherry mushroom sauce, frozen side dish                                | 25 | 4   | B | 4 |
| 75460800 | 8000_Mixed | Vegetable combinations, including carrots, broccoli, and/or dark-green leafy; cooked, with butter sauce and pasta  | 25 | 4   | C | 4 |
| 58106330 | 8000_Mixed | Pizza, cheese, with vegetables, from restaurant or fast food, thick crust                                          | 25 | 3   | C | 4 |
| 27220210 | 8000_Mixed | Ham and noodles, no sauce                                                                                          | 25 | 3   | B | 4 |
| 58106730 | 8000_Mixed | Pizza with meat and vegetables, from restaurant or fast food, thick crust                                          | 25 | 3.5 | D | 4 |
| 58134130 | 8000_Mixed | Stuffed shells, cheese-filled, with meat sauce                                                                     | 24 | 4   | B | 4 |
| 58160400 | 8000_Mixed | Rice, white, with corn, NS as to fat added in cooking                                                              | 24 | 4   | B | 4 |
| 58160420 | 8000_Mixed | Rice, white, with corn, fat added in cooking                                                                       | 24 | 4   | B | 4 |
| 58104530 | 8000_Mixed | Chimichanga with chicken                                                                                           | 24 | 3.5 | C | 4 |
| 58408500 | 8000_Mixed | Noodle soup with vegetables, Asian style                                                                           | 24 | 4.5 | B | 4 |
| 75411033 | 8000_Mixed | Corn, cooked, from canned, with cream sauce, made with milk                                                        | 24 | 4   | C | 4 |
| 27130010 | 8000_Mixed | Lamb or mutton with gravy                                                                                          | 24 | 3.5 | D | 3 |
| 58106750 | 8000_Mixed | Pizza with meat and fruit, thin crust                                                                              | 24 | 2   | D | 4 |
| 58100325 | 8000_Mixed | Burrito with beans, meatless, from fast food                                                                       | 24 | 4   | B | 4 |
| 58106560 | 8000_Mixed | Pizza with pepperoni, from restaurant or fast food, thick crust                                                    | 24 | 2   | D | 4 |
| 27520150 | 8000_Mixed | Bacon, lettuce, and tomato sandwich with spread                                                                    | 24 | 3.5 | C | 4 |
| 58100120 | 8000_Mixed | Burrito with meat and beans                                                                                        | 24 | 3   | C | 4 |
| 27311640 | 8000_Mixed | Beef, potatoes, and vegetables excluding carrots, broccoli, and dark-green leafy; cheese sauce                     | 24 | 4   | B | 4 |
| 27315010 | 8000_Mixed | Beef, rice, and vegetables including carrots, broccoli, and/or dark-green leafy; no sauce                          | 24 | 3.5 | B | 4 |
| 58100260 | 8000_Mixed | Burrito with chicken, beans, rice, and sour cream                                                                  | 24 | 3   | C | 4 |
| 75607010 | 8000_Mixed | Mushroom soup, cream of, prepared with milk                                                                        | 24 | 3   | C | 4 |
| 27236000 | 8000_Mixed | Venison or deer and noodles with cream or white sauce                                                              | 24 | 3.5 | B | 4 |
| 28113140 | 8000_Mixed | Beef with spaetzle or rice, vegetable, frozen meal                                                                 | 24 | 3.5 | B | 4 |
| 51182020 | 8000_Mixed | Bread stuffing made with egg                                                                                       | 24 | 3.5 | C | 4 |
| 14620320 | 8000_Mixed | Topping from meat pizza                                                                                            | 24 | 1   | E | 4 |
| 58106347 | 8000_Mixed | Pizza with cheese and extra vegetables, medium crust                                                               | 24 | 3   | B | 4 |
| 58151220 | 8000_Mixed | Sushi roll tuna                                                                                                    | 24 | 3.5 | B | 4 |
| 27213150 | 8000_Mixed | Chili con carne with beans and rice                                                                                | 24 | 4   | A | 4 |
| 58136150 | 8000_Mixed | Lo mein, with beef                                                                                                 | 24 | 4   | A | 4 |
| 58106360 | 8000_Mixed | Pizza, cheese, with fruit, thick crust                                                                             | 24 | 3   | C | 4 |
| 58304050 | 8000_Mixed | Spaghetti with meat and mushroom sauce, diet frozen meal                                                           | 24 | 4   | B | 4 |
| 27540290 | 8000_Mixed | Chicken submarine sandwich, with lettuce, tomato and spread                                                        | 24 | 4   | A | 4 |
| 27540291 | 8000_Mixed | Chicken submarine sandwich, with cheese, lettuce, tomato and spread                                                | 24 | 4   | A | 4 |
| 58101750 | 8000_Mixed | Taco or tostada with chicken, beans, and sour cream                                                                | 24 | 4   | B | 4 |
| 27213010 | 8000_Mixed | Biryani with meat                                                                                                  | 24 | 4   | A | 4 |
| 58109050 | 8000_Mixed | Pizza, cheese and vegetables, whole wheat thin crust                                                               | 24 | 3.5 | A | 4 |
| 58106606 | 8000_Mixed | Pizza with meat other than pepperoni, from frozen, thick crust                                                     | 24 | 3.5 | D | 4 |
| 27260100 | 8000_Mixed | Meat loaf made with beef and pork, with tomato-based sauce                                                         | 24 | 3.5 | B | 4 |
| 28130000 | 8000_Mixed | Veal dinner, NFS, frozen meal                                                                                      | 24 | 4   | B | 4 |
| 28133110 | 8000_Mixed | Veal, breaded, with spaghetti, in tomato sauce, frozen meal                                                        | 24 | 4   | B | 4 |
| 58146431 | 8000_Mixed | Pasta with cream sauce, poultry, and added vegetables, restaurant                                                  | 24 | 3   | C | 4 |
| 27520165 | 8000_Mixed | Bacon, breaded fried chicken fillet, and tomato club with lettuce and spread                                       | 24 | 3   | C | 4 |
| 58106260 | 8000_Mixed | Pizza, extra cheese, thick crust                                                                                   | 24 | 3.5 | D | 4 |
| 27243000 | 8000_Mixed | Chicken or turkey and rice, no sauce                                                                               | 24 | 3.5 | B | 4 |
| 58107212 | 8000_Mixed | White pizza, cheese, with vegetables, thin crust                                                                   | 24 | 3   | C | 4 |
| 27510615 | 8000_Mixed | Hamburger, 1 medium patty, with condiments, on bun, from fast food / restaurant (Burger King WHOPPER)              | 24 | 3.5 | B | 4 |
| 27510616 | 8000_Mixed | Hamburger, 1 medium patty, with condiments, on bun, from fast food / restaurant (Wendy's 1/4 lb Single )           | 24 | 3.5 | B | 4 |
| 58134810 | 8000_Mixed | Cannelloni, cheese- and spinach-filled, no sauce                                                                   | 24 | 3   | C | 4 |
| 58106230 | 8000_Mixed | Pizza, cheese, from restaurant or fast food, thick crust                                                           | 24 | 3.5 | C | 4 |
| 27214110 | 8000_Mixed | Meat loaf made with beef, with tomato-based sauce                                                                  | 24 | 3.5 | C | 4 |
| 27315320 | 8000_Mixed | Beef, rice, and vegetables excluding carrots, broccoli, and dark-green leafy; mushroom sauce                       | 24 | 3.5 | B | 4 |
| 27360090 | 8000_Mixed | Paella, NFS                                                                                                        | 24 | 3   | D | 4 |
| 27513040 | 8000_Mixed | Roast beef submarine sandwich, with lettuce, tomato and spread                                                     | 24 | 3.5 | B | 4 |
| 27520120 | 8000_Mixed | Bacon and cheese sandwich, with spread                                                                             | 24 | 1.5 | E | 4 |
| 27430510 | 8000_Mixed | Veal goulash with vegetables including carrots, broccoli, and/or dark-green leafy; no potatoes, tomato-based sauce | 24 | 4   | A | 4 |
| 58106760 | 8000_Mixed | Pizza with meat and fruit, thick crust                                                                             | 24 | 3   | C | 4 |
| 28144100 | 8000_Mixed | Chicken and vegetable entree with noodles and cream sauce, frozen meal                                             | 24 | 3.5 | B | 4 |
| 27350090 | 8000_Mixed | Fish, noodles, and vegetables including carrots, broccoli, and/or dark green leafy; cheese sauce                   | 24 | 3.5 | B | 4 |
| 58100530 | 8000_Mixed | Enchilada with meat, red-chile or enchilada sauce                                                                  | 24 | 4   | A | 4 |
| 58160700 | 8000_Mixed | Rice, white, with other vegetables, NS as to fat added in cooking                                                  | 24 | 3.5 | B | 4 |
| 58160720 | 8000_Mixed | Rice, white, with other vegetables, fat added in cooking                                                           | 24 | 3.5 | B | 4 |
| 27540361 | 8000_Mixed | Turkey and bacon submarine sandwich, with cheese, lettuce, tomato and spread                                       | 24 | 3.5 | C | 4 |
| 27218110 | 8000_Mixed | Stuffed pot roast, with potatoes, Puerto Rican style                                                               | 24 | 1.5 | E | 4 |
| 72202020 | 8000_Mixed | Broccoli casserole with rice                                                                                       | 23 | 4   | B | 4 |
| 58100140 | 8000_Mixed | Burrito with meat, beans, and sour cream                                                                           | 23 | 3   | C | 4 |
| 28340690 | 8000_Mixed | Chicken or turkey vegetable soup with potato and cheese, chunky style, canned or ready-to-serve                    | 23 | 4   | C | 4 |
| 58106305 | 8000_Mixed | Pizza, cheese with vegetables, from frozen, thick crust                                                            | 23 | 3   | C | 4 |
| 27430500 | 8000_Mixed | Veal goulash with vegetables excluding carrots, broccoli, and dark-green leafy; no potatoes, tomato-based sauce    | 23 | 4   | A | 4 |
| 27146011 | 8000_Mixed | Chicken, shredded or pulled, with barbecue sauce                                                                   | 23 | 3.5 | D | 4 |
| 58100160 | 8000_Mixed | Burrito with meat, beans, and rice                                                                                 | 23 | 3   | C | 4 |
| 75601000 | 8000_Mixed | Asparagus soup, cream of, NS as to made with milk or water                                                         | 23 | 3   | C | 4 |
| 58126290 | 8000_Mixed | Turnover, meat- and cheese-filled, lower in fat                                                                    | 23 | 3.5 | B | 4 |
| 58116110 | 8000_Mixed | Meat turnover, Puerto Rican style                                                                                  | 23 | 3.5 | C | 4 |
| 27540140 | 8000_Mixed | Chicken fillet, breaded, fried, sandwich                                                                           | 23 | 2   | D | 4 |
| 58104825 | 8000_Mixed | Taquito or flauta with meat and cheese                                                                             | 23 | 3   | B | 4 |
| 27317100 | 8000_Mixed | Beef, dumplings, and vegetables including carrots, broccoli, and/or dark-green leafy; gravy                        | 23 | 3.5 | B | 4 |
| 27150130 | 8000_Mixed | Seafood newburg                                                                                                    | 23 | 1.5 | D | 4 |
| 58421000 | 8000_Mixed | Sopa seca, Mexican style, NFS                                                                                      | 23 | 3.5 | C | 4 |

Supplementary Table 8. Original (uncorrected) scores for all food items.

|          |            |                                                                                               |    |     |   |   |
|----------|------------|-----------------------------------------------------------------------------------------------|----|-----|---|---|
| 27315420 | 8000_Mixed | Beef, rice, and vegetables excluding carrots, broccoli, and dark-green leafy; gravy           | 23 | 3.5 | B | 4 |
| 27246100 | 8000_Mixed | Chicken or turkey with dumplings                                                              | 23 | 3.5 | B | 4 |
| 27214300 | 8000_Mixed | Beef wellington                                                                               | 23 | 2   | D | 4 |
| 27242350 | 8000_Mixed | Chicken or turkey tetrazzini                                                                  | 23 | 3.5 | B | 4 |
| 58126410 | 8000_Mixed | Turnover, filled with egg, meat, and cheese, lower in fat                                     | 23 | 3.5 | B | 4 |
| 27243400 | 8000_Mixed | Chicken or turkey and rice with mushroom sauce                                                | 23 | 3.5 | B | 4 |
| 58106702 | 8000_Mixed | Pizza with meat and vegetables, from frozen, medium crust                                     | 23 | 2   | D | 4 |
| 58104820 | 8000_Mixed | Taquito or flauta with meat                                                                   | 23 | 3   | B | 4 |
| 58101745 | 8000_Mixed | Taco or tostada with meat, beans, and sour cream                                              | 23 | 4   | B | 4 |
| 58145190 | 8000_Mixed | Macaroni or noodles with cheese and chicken or turkey                                         | 23 | 3.5 | B | 4 |
| 58106700 | 8000_Mixed | Pizza with meat and vegetables, from frozen, thin crust                                       | 23 | 2   | D | 4 |
| 27250130 | 8000_Mixed | Shrimp and noodles with cheese sauce                                                          | 23 | 3.5 | B | 4 |
| 58106604 | 8000_Mixed | Pizza with meat other than pepperoni, from frozen, medium crust                               | 23 | 3.5 | C | 4 |
| 75418040 | 8000_Mixed | Squash, summer, casserole, with cheese sauce                                                  | 23 | 4.5 | B | 4 |
| 28143200 | 8000_Mixed | Chicken in soy-based sauce, rice and vegetables, frozen meal                                  | 23 | 4   | A | 4 |
| 28345020 | 8000_Mixed | Chicken or turkey soup, cream of, canned, reduced sodium, made with milk                      | 23 | 3.5 | B | 4 |
| 28110350 | 8000_Mixed | Salisbury steak with gravy, potatoes, vegetable, dessert, frozen meal                         | 23 | 3.5 | B | 4 |
| 58106205 | 8000_Mixed | Pizza, cheese, from frozen, thick crust                                                       | 23 | 3.5 | C | 4 |
| 58106655 | 8000_Mixed | Pizza with extra meat, medium crust                                                           | 23 | 2   | D | 4 |
| 58100165 | 8000_Mixed | Burrito with meat, beans, rice, and sour cream                                                | 23 | 3   | C | 4 |
| 58106516 | 8000_Mixed | Pizza with pepperoni, from frozen, thick crust                                                | 23 | 3.5 | D | 4 |
| 27411150 | 8000_Mixed | Beef rolls, stuffed with vegetables or meat mixture, tomato-based sauce                       | 23 | 4   | C | 4 |
| 58101620 | 8000_Mixed | Soft taco with meat and beans                                                                 | 23 | 3.5 | C | 4 |
| 58106602 | 8000_Mixed | Pizza with meat other than pepperoni, from frozen, thin crust                                 | 23 | 3.5 | D | 4 |
| 58304060 | 8000_Mixed | Spaghetti with meat sauce, diet frozen meal                                                   | 23 | 4   | B | 4 |
| 58106540 | 8000_Mixed | Pizza with pepperoni, from restaurant or fast food, NS as to type of crust                    | 23 | 2   | D | 4 |
| 58106555 | 8000_Mixed | Pizza with pepperoni, from restaurant or fast food, medium crust                              | 23 | 2   | D | 4 |
| 27242300 | 8000_Mixed | Chicken or turkey and noodles with cream or white sauce                                       | 23 | 3.5 | B | 4 |
| 58104500 | 8000_Mixed | Chimichanga with meat                                                                         | 23 | 3.5 | C | 4 |
| 75601010 | 8000_Mixed | Asparagus soup, cream of, prepared with milk                                                  | 23 | 3   | C | 4 |
| 32300100 | 8000_Mixed | Egg drop soup                                                                                 | 23 | 3   | C | 4 |
| 58304010 | 8000_Mixed | Spaghetti and meatballs dinner, NFS, frozen meal                                              | 23 | 4   | B | 4 |
| 27564050 | 8000_Mixed | Frankfurter or hot dog sandwich, NFS, plain, on multigrain bread                              | 23 | 2   | D | 4 |
| 27564110 | 8000_Mixed | Frankfurter or hot dog sandwich, beef, plain, on multigrain bread                             | 23 | 2   | D | 4 |
| 58101635 | 8000_Mixed | Soft taco with chicken, beans, and sour cream                                                 | 23 | 3.5 | B | 4 |
| 58105000 | 8000_Mixed | Fajita with chicken and vegetables                                                            | 22 | 3.5 | B | 4 |
| 58112510 | 8000_Mixed | Dumpling, steamed, filled with meat, poultry, or seafood                                      | 22 | 3.5 | B | 4 |
| 58134720 | 8000_Mixed | Tortellini, spinach-filled, no sauce                                                          | 22 | 3.5 | B | 4 |
| 58403050 | 8000_Mixed | Chicken or turkey noodle soup, cream of, home recipe, canned, or ready-to-serve               | 22 | 3   | C | 4 |
| 27350100 | 8000_Mixed | Fish, noodles, and vegetables excluding carrots, broccoli, and dark-green leafy; cheese sauce | 22 | 3.5 | B | 4 |
| 74602050 | 8000_Mixed | Tomato soup, instant type, prepared with water                                                | 22 | 4   | C | 4 |
| 28315160 | 8000_Mixed | Italian Wedding Soup                                                                          | 22 | 4   | B | 4 |
| 58106630 | 8000_Mixed | Pizza with meat other than pepperoni, from restaurant or fast food, thick crust               | 22 | 2   | D | 4 |
| 27120120 | 8000_Mixed | Sausage gravy                                                                                 | 22 | 3   | C | 4 |
| 58104550 | 8000_Mixed | Chimichanga with chicken and sour cream                                                       | 22 | 3.5 | C | 4 |
| 74604600 | 8000_Mixed | Tomato noodle soup, canned, prepared with milk                                                | 22 | 3.5 | B | 4 |
| 28355420 | 8000_Mixed | Shrimp soup, cream of, prepared with milk                                                     | 22 | 3   | C | 4 |
| 27221100 | 8000_Mixed | Stewed pig's feet, Puerto Rican style                                                         | 22 | 4   | C | 4 |
| 27113100 | 8000_Mixed | Beef stroganoff                                                                               | 22 | 3   | C | 4 |
| 27520360 | 8000_Mixed | Ham and cheese sandwich, on bun, with lettuce and spread                                      | 22 | 2   | D | 4 |
| 27540111 | 8000_Mixed | Chicken sandwich, with cheese and spread                                                      | 22 | 3.5 | C | 4 |
| 75607040 | 8000_Mixed | Mushroom soup, with meat broth, prepared with water                                           | 22 | 4   | C | 4 |
| 28355410 | 8000_Mixed | Shrimp soup, cream of, NS as to prepared with milk or water                                   | 22 | 3   | C | 4 |
| 58106514 | 8000_Mixed | Pizza with pepperoni, from frozen, medium crust                                               | 22 | 2   | D | 4 |
| 27150060 | 8000_Mixed | Lobster newburg                                                                               | 22 | 1.5 | D | 4 |
| 58100145 | 8000_Mixed | Burrito with meat, beans, and sour cream, from fast food                                      | 22 | 4   | B | 4 |
| 27212400 | 8000_Mixed | Beef and noodles with mushroom sauce                                                          | 22 | 3.5 | B | 4 |
| 58404510 | 8000_Mixed | Chicken or turkey soup with dumplings and potatoes, home recipe, canned, or ready-to-serve    | 22 | 3.5 | B | 4 |
| 28145710 | 8000_Mixed | Turkey tetrazzini, frozen meal                                                                | 22 | 3.5 | B | 4 |
| 27161010 | 8000_Mixed | Meat loaf, Puerto Rican style                                                                 | 22 | 1.5 | D | 4 |
| 58404520 | 8000_Mixed | Chicken or turkey soup with dumplings, home recipe, canned or ready-to-serve                  | 22 | 3.5 | B | 4 |
| 28340510 | 8000_Mixed | Chicken or turkey noodle soup, chunky style, canned or ready-to-serve                         | 22 | 3.5 | B | 4 |
| 58134620 | 8000_Mixed | Tortellini, cheese-filled, meatless, with tomato sauce                                        | 22 | 4   | B | 4 |
| 27520390 | 8000_Mixed | Ham and cheese submarine sandwich, with lettuce, tomato and spread                            | 22 | 3.5 | A | 4 |
| 28160300 | 8000_Mixed | Meat loaf dinner, NFS, frozen meal                                                            | 22 | 4   | B | 4 |
| 28160310 | 8000_Mixed | Meat loaf with potatoes, vegetable, frozen meal                                               | 22 | 4   | B | 4 |
| 58100020 | 8000_Mixed | Burrito, taco, or quesadilla with egg, beans, and breakfast meat                              | 22 | 3   | C | 4 |
| 58107205 | 8000_Mixed | White pizza, cheese, thin crust                                                               | 22 | 2   | D | 4 |
| 58146391 | 8000_Mixed | Pasta with cream sauce and added vegetables, restaurant                                       | 22 | 3.5 | C | 4 |
| 75649050 | 8000_Mixed | Vegetable soup, made from dry mix                                                             | 22 | 3   | C | 4 |
| 27560000 | 8000_Mixed | Luncheon meat sandwich, NFS, with spread                                                      | 22 | 3.5 | A | 4 |
| 27416200 | 8000_Mixed | Beef, ground, with egg and onion                                                              | 22 | 2   | D | 3 |
| 58106200 | 8000_Mixed | Pizza, cheese, from frozen, thin crust                                                        | 22 | 3.5 | C | 4 |
| 27250820 | 8000_Mixed | Fish and rice with cream sauce                                                                | 22 | 3.5 | B | 4 |
| 58106512 | 8000_Mixed | Pizza with pepperoni, from frozen, thin crust                                                 | 22 | 3.5 | C | 4 |
| 58106325 | 8000_Mixed | Pizza, cheese, with vegetables, from restaurant or fast food, medium crust                    | 22 | 3   | C | 4 |
| 58136140 | 8000_Mixed | Lo mein, with pork                                                                            | 22 | 3.5 | A | 4 |
| 58106633 | 8000_Mixed | Pizza, with meat other than pepperoni, stuffed crust                                          | 21 | 2   | D | 4 |
| 58109060 | 8000_Mixed | Pizza, cheese and vegetables, whole wheat thick crust                                         | 21 | 3.5 | A | 4 |
| 58146411 | 8000_Mixed | Pasta with cream sauce, meat, and added vegetables, restaurant                                | 21 | 3.5 | C | 4 |
| 27360010 | 8000_Mixed | Goulash, NFS                                                                                  | 21 | 3.5 | B | 4 |
| 58200100 | 8000_Mixed | Wrap sandwich, filled with meat, poultry, or fish, vegetables, and rice                       | 21 | 3.5 | A | 4 |
| 58150530 | 8000_Mixed | Adobo, with rice                                                                              | 21 | 3.5 | C | 4 |
| 58306010 | 8000_Mixed | Beef enchilada dinner, NFS, frozen meal                                                       | 21 | 4   | B | 4 |
| 58101555 | 8000_Mixed | Soft taco with fish                                                                           | 21 | 3.5 | C | 4 |
| 27260090 | 8000_Mixed | Meat loaf made with beef, veal and pork                                                       | 21 | 3.5 | C | 4 |

Supplementary Table 8. Original (uncorrected) scores for all food items.

|          |            |                                                                                                                 |    |     |   |   |
|----------|------------|-----------------------------------------------------------------------------------------------------------------|----|-----|---|---|
| 58147340 | 8000_Mixed | Macaroni or noodles, creamed, with cheese and tuna                                                              | 21 | 3.5 | A | 4 |
| 75414500 | 8000_Mixed | Okra, batter-dipped, fried                                                                                      | 21 | 4   | A | 4 |
| 27235750 | 8000_Mixed | Veal and noodles with cream or white sauce                                                                      | 21 | 3.5 | B | 4 |
| 58106359 | 8000_Mixed | Pizza, cheese, with fruit, medium crust                                                                         | 21 | 3.5 | C | 4 |
| 58133120 | 8000_Mixed | Manicotti, cheese-filled, with tomato sauce, meatless                                                           | 21 | 3   | B | 4 |
| 58146421 | 8000_Mixed | Pasta with cream sauce and poultry, restaurant                                                                  | 21 | 3.5 | D | 4 |
| 27260080 | 8000_Mixed | Meat loaf made with beef and pork                                                                               | 21 | 3.5 | C | 4 |
| 58133130 | 8000_Mixed | Manicotti, cheese-filled, with meat sauce                                                                       | 21 | 3   | C | 4 |
| 27214100 | 8000_Mixed | Meat loaf made with beef                                                                                        | 21 | 3.5 | C | 4 |
| 27540350 | 8000_Mixed | Turkey submarine sandwich, with cheese, lettuce, tomato and spread                                              | 21 | 4   | A | 4 |
| 58304300 | 8000_Mixed | Cannelloni, cheese-filled, with tomato sauce, diet frozen meal                                                  | 21 | 3   | C | 4 |
| 58136120 | 8000_Mixed | Lo mein, meatless                                                                                               | 21 | 4   | B | 4 |
| 58165030 | 8000_Mixed | Rice, white, with vegetables and gravy, NS as to fat added in cooking                                           | 21 | 4   | B | 4 |
| 58165050 | 8000_Mixed | Rice, white, with vegetables and gravy, fat added in cooking                                                    | 21 | 4   | B | 4 |
| 71801000 | 8000_Mixed | Potato soup, NS as to made with milk or water                                                                   | 21 | 3   | C | 4 |
| 58122310 | 8000_Mixed | Knish, potato                                                                                                   | 21 | 3.5 | C | 4 |
| 27540180 | 8000_Mixed | Chicken patty sandwich or biscuit                                                                               | 21 | 2   | D | 4 |
| 58136110 | 8000_Mixed | Lo mein, NFS                                                                                                    | 21 | 4   | B | 4 |
| 27520155 | 8000_Mixed | Bacon, lettuce, and tomato submarine sandwich, with spread                                                      | 21 | 4   | A | 4 |
| 58146453 | 8000_Mixed | Pasta with cream sauce, seafood, and added vegetables, ready-to-heat                                            | 21 | 3   | C | 4 |
| 58400000 | 8000_Mixed | Soup, NFS                                                                                                       | 21 | 3   | C | 4 |
| 58106755 | 8000_Mixed | Pizza with meat and fruit, medium crust                                                                         | 21 | 3   | C | 4 |
| 27317110 | 8000_Mixed | Beef, dumplings, and vegetables excluding carrots, broccoli, and dark-green leafy; gravy                        | 21 | 3.5 | B | 4 |
| 58101630 | 8000_Mixed | Soft taco with meat, beans, and sour cream                                                                      | 21 | 3.5 | C | 4 |
| 27250110 | 8000_Mixed | Scallops and noodles with cheese sauce                                                                          | 21 | 3.5 | B | 4 |
| 28143040 | 8000_Mixed | Chicken chow mein with rice, diet frozen meal                                                                   | 21 | 4   | B | 4 |
| 75142500 | 8000_Mixed | Cucumber salad, made with sour cream dressing                                                                   | 21 | 4   | C | 4 |
| 58106210 | 8000_Mixed | Pizza, cheese, from restaurant or fast food, NS as to type of crust                                             | 21 | 3.5 | C | 4 |
| 58106225 | 8000_Mixed | Pizza, cheese, from restaurant or fast food, medium crust                                                       | 21 | 3.5 | C | 4 |
| 58134613 | 8000_Mixed | Tortellini, meat-filled, with tomato sauce, canned                                                              | 21 | 4   | B | 4 |
| 75608100 | 8000_Mixed | Onion soup, French                                                                                              | 21 | 3   | C | 4 |
| 27212200 | 8000_Mixed | Beef and noodles with gravy                                                                                     | 21 | 3.5 | B | 4 |
| 58137300 | 8000_Mixed | Adobo, with noodles                                                                                             | 21 | 3.5 | C | 4 |
| 27315020 | 8000_Mixed | Beef, rice, and vegetables excluding carrots, broccoli, and dark-green leafy; no sauce                          | 21 | 3.5 | B | 4 |
| 58109030 | 8000_Mixed | Pizza, with meat, whole wheat thin crust                                                                        | 21 | 3.5 | C | 4 |
| 27540150 | 8000_Mixed | Chicken fillet, breaded, fried, sandwich with lettuce, tomato and spread                                        | 21 | 3   | C | 4 |
| 58403010 | 8000_Mixed | Chicken or turkey noodle soup, canned or ready-to-serve                                                         | 21 | 3   | C | 4 |
| 58146452 | 8000_Mixed | Pasta with cream sauce, seafood, and added vegetables, home recipe                                              | 21 | 3.5 | B | 4 |
| 58200300 | 8000_Mixed | Wrap sandwich, filled with meat, poultry, or fish, vegetables, rice, and cheese                                 | 20 | 3.5 | B | 4 |
| 27146400 | 8000_Mixed | Chicken kiev                                                                                                    | 20 | 2   | D | 4 |
| 27260010 | 8000_Mixed | Meat loaf, NS as to type of meat                                                                                | 20 | 3.5 | C | 4 |
| 27513041 | 8000_Mixed | Roast beef submarine sandwich, with cheese, lettuce, tomato and spread                                          | 20 | 3.5 | C | 4 |
| 27510000 | 8000_Mixed | Beef sandwich, NFS                                                                                              | 20 | 3.5 | C | 4 |
| 58163400 | 8000_Mixed | Flavored rice and pasta mixture, reduced sodium                                                                 | 20 | 3.5 | B | 4 |
| 27560500 | 8000_Mixed | Pepperoni and salami submarine sandwich, with lettuce, tomato and spread                                        | 20 | 3.5 | C | 4 |
| 58106233 | 8000_Mixed | Pizza, cheese, stuffed crust                                                                                    | 20 | 2   | D | 4 |
| 58104340 | 8000_Mixed | Gordita, sope, or chalupa with chicken                                                                          | 20 | 3   | C | 4 |
| 27343950 | 8000_Mixed | Chicken or turkey, noodles, and vegetables including carrots, broccoli, and/or dark-green leafy; cheese sauce   | 20 | 3.5 | B | 4 |
| 58131610 | 8000_Mixed | Ravioli, cheese and spinach filled, with tomato sauce                                                           | 20 | 3.5 | C | 4 |
| 58105050 | 8000_Mixed | Fajita with meat and vegetables                                                                                 | 20 | 3.5 | B | 4 |
| 27560910 | 8000_Mixed | Cold cut submarine sandwich, with cheese, lettuce, tomato and spread                                            | 20 | 3   | C | 4 |
| 27520370 | 8000_Mixed | Hot ham and cheese sandwich, on bun                                                                             | 20 | 2   | D | 4 |
| 28110000 | 8000_Mixed | Beef dinner, NFS, frozen meal                                                                                   | 20 | 4   | B | 4 |
| 28110300 | 8000_Mixed | Salisbury steak dinner, NFS, frozen meal                                                                        | 20 | 4   | B | 4 |
| 28110310 | 8000_Mixed | Salisbury steak with gravy, potatoes, vegetable, frozen meal                                                    | 20 | 4   | B | 4 |
| 58163450 | 8000_Mixed | Spanish rice with ground beef                                                                                   | 20 | 3.5 | B | 4 |
| 27142100 | 8000_Mixed | Chicken or turkey fricassee                                                                                     | 20 | 3.5 | B | 4 |
| 28101000 | 8000_Mixed | Frozen dinner, NFS                                                                                              | 20 | 4   | B | 4 |
| 58109020 | 8000_Mixed | Pizza, cheese, whole wheat thick crust                                                                          | 20 | 3.5 | C | 4 |
| 58100005 | 8000_Mixed | Burrito, taco, or quesadilla with egg and potato                                                                | 20 | 3   | C | 4 |
| 75409020 | 8000_Mixed | Cauliflower, batter-dipped, fried                                                                               | 20 | 4   | C | 4 |
| 27560120 | 8000_Mixed | Bologna and cheese sandwich, with spread                                                                        | 20 | 1.5 | D | 4 |
| 28340700 | 8000_Mixed | Bird's nest soup                                                                                                | 20 | 3   | C | 4 |
| 58134120 | 8000_Mixed | Stuffed shells, cheese-filled, with tomato sauce, meatless                                                      | 20 | 3   | C | 4 |
| 58106565 | 8000_Mixed | Pizza with pepperoni, stuffed crust                                                                             | 20 | 2   | D | 4 |
| 27212350 | 8000_Mixed | Beef stroganoff with noodles                                                                                    | 20 | 3.5 | B | 4 |
| 75607020 | 8000_Mixed | Mushroom soup, cream of, prepared with water                                                                    | 20 | 3.5 | C | 4 |
| 75657000 | 8000_Mixed | Vegetable broth, bouillon                                                                                       | 20 | 3   | C | 4 |
| 27520320 | 8000_Mixed | Ham and cheese sandwich, with lettuce and spread                                                                | 20 | 2   | D | 4 |
| 58160560 | 8000_Mixed | Rice, white, with dark green vegetables, fat not added in cooking                                               | 20 | 3.5 | B | 4 |
| 32202200 | 8000_Mixed | Egg and cheese on biscuit                                                                                       | 20 | 2   | D | 4 |
| 27520166 | 8000_Mixed | Bacon, breaded fried chicken fillet, and tomato club sandwich with cheese, lettuce and spread                   | 20 | 3   | D | 4 |
| 27540300 | 8000_Mixed | Wrap sandwich filled with broiled chicken strips, cheese, lettuce, and spread                                   | 20 | 3   | C | 4 |
| 27510346 | 8000_Mixed | Bacon cheeseburger, 1 large patty, with condiments, on bun, from fast food / restaurant                         | 20 | 3   | D | 4 |
| 27319010 | 8000_Mixed | Stuffed green pepper, Puerto Rican style                                                                        | 20 | 4   | C | 4 |
| 28143170 | 8000_Mixed | Chicken in cream sauce with noodles and vegetable, frozen meal                                                  | 19 | 3.5 | B | 4 |
| 58156110 | 8000_Mixed | Fried rice, Puerto Rican style                                                                                  | 19 | 3   | D | 4 |
| 28110220 | 8000_Mixed | Sirloin, chopped, with gravy, mashed potatoes, vegetable, frozen meal                                           | 19 | 4   | C | 4 |
| 28140100 | 8000_Mixed | Chicken dinner, NFS, frozen meal                                                                                | 19 | 3.5 | B | 4 |
| 58106650 | 8000_Mixed | Pizza with extra meat, thin crust                                                                               | 19 | 2   | D | 4 |
| 58145111 | 8000_Mixed | Macaroni or noodles with cheese, from restaurant                                                                | 19 | 3   | C | 4 |
| 58131320 | 8000_Mixed | Ravioli, meat-filled, with tomato sauce or meat sauce                                                           | 19 | 3.5 | C | 4 |
| 27520350 | 8000_Mixed | Ham and cheese sandwich, with spread, grilled                                                                   | 19 | 1.5 | D | 4 |
| 27510389 | 8000_Mixed | Double cheeseburger, 2 small patties, with condiments, on bun, from fast food / restaurant (McDonald's Big Mac) | 19 | 2   | D | 4 |
| 58404040 | 8000_Mixed | Chicken or turkey rice soup, reduced sodium, canned, prepared with water or ready-to-serve                      | 19 | 3.5 | B | 4 |
| 28140740 | 8000_Mixed | Chicken patty or nuggets, boneless, breaded, with pasta and tomato sauce, fruit, dessert, frozen meal           | 19 | 3.5 | C | 4 |

Supplementary Table 8. Original (uncorrected) scores for all food items.

|          |            |                                                                                                                  |    |     |   |   |
|----------|------------|------------------------------------------------------------------------------------------------------------------|----|-----|---|---|
| 28110620 | 8000_Mixed | Beef short ribs, boneless, with barbecue sauce, potatoes, vegetable, frozen meal                                 | 19 | 4.5 | A | 4 |
| 58421060 | 8000_Mixed | Sopa seca de arroz, home recipe, Mexican style                                                                   | 19 | 3.5 | C | 4 |
| 58100235 | 8000_Mixed | Burrito with chicken and sour cream                                                                              | 19 | 2   | D | 4 |
| 27220010 | 8000_Mixed | Meat loaf made with ham                                                                                          | 19 | 2   | D | 4 |
| 27113000 | 8000_Mixed | Beef with cream or white sauce                                                                                   | 19 | 4   | C | 4 |
| 58125110 | 8000_Mixed | Quiche with meat, poultry or fish                                                                                | 19 | 1   | E | 4 |
| 58146401 | 8000_Mixed | Pasta with cream sauce and meat, restaurant                                                                      | 19 | 2   | D | 4 |
| 27520156 | 8000_Mixed | Bacon, lettuce, tomato, and cheese submarine sandwich, with spread                                               | 19 | 3.5 | D | 4 |
| 27343960 | 8000_Mixed | Chicken or turkey, noodles, and vegetables excluding carrots, broccoli, and dark-green leafy; cheese sauce       | 19 | 3.5 | B | 4 |
| 58134610 | 8000_Mixed | Tortellini, meat-filled, with tomato sauce                                                                       | 19 | 3   | C | 4 |
| 58146120 | 8000_Mixed | Pasta with tomato-based sauce, cheese and meat                                                                   | 19 | 3.5 | B | 4 |
| 58109040 | 8000_Mixed | Pizza, with meat, whole wheat thick crust                                                                        | 19 | 3.5 | C | 4 |
| 58146381 | 8000_Mixed | Pasta with cream sauce, restaurant                                                                               | 19 | 2   | D | 4 |
| 58125180 | 8000_Mixed | Cheese quiche, meatless                                                                                          | 19 | 1   | D | 4 |
| 58100015 | 8000_Mixed | Burrito, taco, or quesadilla with egg, potato, and breakfast meat                                                | 19 | 2   | D | 4 |
| 28110390 | 8000_Mixed | Salisbury steak, potatoes, vegetable, dessert, diet frozen meal                                                  | 19 | 4.5 | B | 4 |
| 58100200 | 8000_Mixed | Burrito with chicken                                                                                             | 19 | 2   | D | 4 |
| 58105075 | 8000_Mixed | Fajita with vegetables                                                                                           | 19 | 4   | C | 4 |
| 27162500 | 8000_Mixed | Stewed, seasoned, ground beef and pork, Mexican style                                                            | 19 | 4   | B | 4 |
| 52204000 | 8000_Mixed | Cornbread stuffing                                                                                               | 19 | 3   | C | 4 |
| 27160100 | 8000_Mixed | Meatballs, NS as to type of meat, with sauce                                                                     | 19 | 2   | D | 3 |
| 28320130 | 8000_Mixed | Ham, rice, and potato soup, Puerto Rican style                                                                   | 19 | 4   | B | 4 |
| 58135110 | 8000_Mixed | Chow fun noodles with meat and vegetables                                                                        | 19 | 4.5 | A | 4 |
| 75601020 | 8000_Mixed | Asparagus soup, cream of, prepared with water                                                                    | 19 | 4   | C | 4 |
| 58151450 | 8000_Mixed | Sushi, topped with egg                                                                                           | 19 | 3.5 | B | 4 |
| 58122330 | 8000_Mixed | Knish, meat                                                                                                      | 19 | 2   | D | 4 |
| 58165060 | 8000_Mixed | Rice, white, with vegetables, soy-based sauce, NS as to fat added in cooking                                     | 19 | 4   | C | 4 |
| 58165080 | 8000_Mixed | Rice, white, with vegetables, soy-based sauce, fat added in cooking                                              | 19 | 4   | C | 4 |
| 58145140 | 8000_Mixed | Macaroni or noodles with cheese and tomato                                                                       | 19 | 4   | B | 4 |
| 75607000 | 8000_Mixed | Mushroom soup, NFS                                                                                               | 19 | 3.5 | C | 4 |
| 27220310 | 8000_Mixed | Ham or pork and rice, no sauce                                                                                   | 19 | 3.5 | B | 4 |
| 27320030 | 8000_Mixed | Ham or pork, noodles and vegetables excluding carrots, broccoli, and dark-green leafy; cheese sauce              | 19 | 3.5 | B | 4 |
| 27420200 | 8000_Mixed | Pork hash                                                                                                        | 19 | 3   | D | 4 |
| 32204010 | 8000_Mixed | Scrambled egg sandwich                                                                                           | 18 | 3.5 | B | 4 |
| 27564363 | 8000_Mixed | Frankfurter or hot dog sandwich, fat free, plain, on whole grain white bun                                       | 18 | 3.5 | C | 4 |
| 27120080 | 8000_Mixed | Ham stroganoff                                                                                                   | 18 | 3.5 | D | 4 |
| 58163405 | 8000_Mixed | Spanish rice, from restaurant                                                                                    | 18 | 3.5 | C | 4 |
| 27541000 | 8000_Mixed | Turkey, ham, and roast beef club sandwich, with lettuce, tomato and spread                                       | 18 | 3.5 | C | 4 |
| 58104320 | 8000_Mixed | Gordita, sope, or chalupa with chicken and sour cream                                                            | 18 | 3   | C | 4 |
| 58104745 | 8000_Mixed | Quesadilla with chicken, from fast food                                                                          | 18 | 1.5 | D | 4 |
| 73211110 | 8000_Mixed | Sweet potato and pumpkin casserole, Puerto Rican style                                                           | 18 | 3.5 | C | 4 |
| 27212000 | 8000_Mixed | Beef and noodles, no sauce                                                                                       | 18 | 3.5 | B | 4 |
| 75607090 | 8000_Mixed | Mushroom soup, cream of, canned, reduced sodium, NS as to made with milk or water                                | 18 | 4   | B | 4 |
| 75607140 | 8000_Mixed | Mushroom soup, cream of, canned, reduced sodium, prepared with water                                             | 18 | 4   | B | 4 |
| 58131120 | 8000_Mixed | Ravioli, NS as to filling, with cream sauce                                                                      | 18 | 3.5 | B | 4 |
| 58104290 | 8000_Mixed | Gordita, sope, or chalupa with meat                                                                              | 18 | 3   | C | 4 |
| 58106550 | 8000_Mixed | Pizza with pepperoni, from restaurant or fast food, thin crust                                                   | 18 | 1.5 | D | 4 |
| 58404500 | 8000_Mixed | Matzo ball soup                                                                                                  | 18 | 3.5 | B | 4 |
| 27510266 | 8000_Mixed | Cheeseburger, 1 large patty, with condiments, on bun, from fast food / restaurant                                | 18 | 3   | D | 4 |
| 27330080 | 8000_Mixed | Lamb or mutton, rice, and vegetables including carrots, broccoli, and/or dark-green leafy; gravy                 | 18 | 3.5 | B | 4 |
| 58106620 | 8000_Mixed | Pizza with meat other than pepperoni, from restaurant or fast food, thin crust                                   | 18 | 1.5 | D | 4 |
| 27260050 | 8000_Mixed | Meatballs, with breading, NS as to type of meat, with gravy                                                      | 18 | 3.5 | C | 4 |
| 14710100 | 8000_Mixed | Cheddar cheese soup, home recipe, canned or ready-to-serve                                                       | 18 | 3   | C | 4 |
| 28110370 | 8000_Mixed | Salisbury steak with gravy, macaroni and cheese, vegetable, frozen meal                                          | 18 | 3   | C | 4 |
| 58100125 | 8000_Mixed | Burrito with meat and beans, from fast food                                                                      | 18 | 3.5 | B | 4 |
| 58145170 | 8000_Mixed | Macaroni or noodles with cheese and egg                                                                          | 18 | 3   | C | 4 |
| 27564503 | 8000_Mixed | Frankfurter or hot dog sandwich, with meatless chili, on whole grain white bun                                   | 18 | 3   | C | 4 |
| 28133340 | 8000_Mixed | Veal parmigiana with vegetable, fettuccine alfredo, dessert, frozen meal                                         | 18 | 4   | C | 4 |
| 75410550 | 8000_Mixed | Jalapeno pepper, stuffed with cheese, breaded or battered, fried                                                 | 18 | 3.5 | C | 4 |
| 28355430 | 8000_Mixed | Shrimp soup, cream of, prepared with water                                                                       | 18 | 3   | C | 4 |
| 27510451 | 8000_Mixed | Double bacon cheeseburger, 2 medium patties, with condiments, on bun, from fast food / restaurant                | 18 | 2   | D | 4 |
| 27510465 | 8000_Mixed | Double bacon cheeseburger, 2 medium patties, with condiments, on bun, from fast food / restaurant (Wendy's Ba    | 18 | 2   | D | 4 |
| 28141010 | 8000_Mixed | Chicken, fried, with potatoes, vegetable, dessert, frozen meal, large meat portion                               | 18 | 4   | C | 4 |
| 27111500 | 8000_Mixed | Beef sloppy joe, no bun                                                                                          | 18 | 3.5 | C | 4 |
| 27212300 | 8000_Mixed | Beef and noodles with cream or white sauce                                                                       | 18 | 3.5 | B | 4 |
| 27540130 | 8000_Mixed | Chicken barbecue sandwich                                                                                        | 18 | 4   | B | 4 |
| 58101520 | 8000_Mixed | Taco or tostada with chicken                                                                                     | 18 | 3   | C | 4 |
| 58200200 | 8000_Mixed | Wrap sandwich, filled with vegetables and rice                                                                   | 18 | 4   | B | 4 |
| 27213400 | 8000_Mixed | Beef and rice with mushroom sauce                                                                                | 18 | 3.5 | B | 4 |
| 14710200 | 8000_Mixed | Beer cheese soup, made with milk                                                                                 | 18 | 2   | D | 4 |
| 27510431 | 8000_Mixed | Double bacon cheeseburger, 2 small patties, with condiments, on bun, from fast food / restaurant (Burger King Ba | 18 | 2   | D | 4 |
| 58108000 | 8000_Mixed | Calzone, with cheese, meatless                                                                                   | 17 | 1.5 | E | 4 |
| 58200250 | 8000_Mixed | Wrap sandwich, filled with vegetables                                                                            | 17 | 4   | C | 4 |
| 28140250 | 8000_Mixed | Chicken, boneless, with gravy, dressing, rice, vegetable, dessert, frozen meal                                   | 17 | 3.5 | A | 4 |
| 27510705 | 8000_Mixed | Chilliburger, with or without cheese, on bun                                                                     | 17 | 3.5 | C | 4 |
| 75418030 | 8000_Mixed | Squash, summer, casserole, with rice and tomato sauce                                                            | 17 | 4.5 | B | 4 |
| 28317010 | 8000_Mixed | Beef stroganoff soup, chunky style, home recipe, canned or ready-to-serve                                        | 17 | 3.5 | C | 4 |
| 27510667 | 8000_Mixed | Double hamburger, 2 small patties, with condiments, on bun, from fast food / restaurant                          | 17 | 3.5 | C | 4 |
| 58120120 | 8000_Mixed | Crepe, filled with meat, poultry, or seafood, no sauce                                                           | 17 | 3   | C | 4 |
| 27235000 | 8000_Mixed | Meat loaf made with venison/deer                                                                                 | 17 | 3.5 | C | 4 |
| 58145135 | 8000_Mixed | Macaroni or noodles with cheese and meat                                                                         | 17 | 3.5 | C | 4 |
| 58131520 | 8000_Mixed | Ravioli, cheese-filled, with tomato sauce                                                                        | 17 | 4   | B | 4 |
| 58104280 | 8000_Mixed | Gordita, sope, or chalupa with meat and sour cream                                                               | 17 | 3   | C | 4 |
| 58160440 | 8000_Mixed | Rice, white, with peas, fat not added in cooking                                                                 | 17 | 4   | A | 4 |
| 27220020 | 8000_Mixed | Ham and noodles with cream or white sauce                                                                        | 17 | 3   | C | 4 |
| 58126150 | 8000_Mixed | Turnover, meat- and cheese-filled, tomato-based sauce                                                            | 17 | 3   | C | 4 |

Supplementary Table 8. Original (uncorrected) scores for all food items.

|          |            |                                                                                                                 |    |     |   |   |
|----------|------------|-----------------------------------------------------------------------------------------------------------------|----|-----|---|---|
| 58131110 | 8000_Mixed | Ravioli, NFS as to filling, with tomato sauce                                                                   | 17 | 3   | B | 4 |
| 58160000 | 8000_Mixed | Biryani with vegetables                                                                                         | 17 | 4.5 | B | 4 |
| 14640000 | 8000_Mixed | Cheese sandwich, NFS                                                                                            | 17 | 1.5 | D | 4 |
| 14640002 | 8000_Mixed | Cheese sandwich, American cheese, on white bread, no spread                                                     | 17 | 1.5 | D | 4 |
| 14640050 | 8000_Mixed | Cheese sandwich, American cheese, on white bread, with butter                                                   | 17 | 1   | E | 4 |
| 27112010 | 8000_Mixed | Salisbury steak with gravy                                                                                      | 17 | 3   | C | 4 |
| 27520140 | 8000_Mixed | Bacon and egg sandwich                                                                                          | 17 | 3.5 | C | 4 |
| 58404100 | 8000_Mixed | Rice and potato soup, Puerto Rican style                                                                        | 17 | 4   | C | 4 |
| 58107050 | 8000_Mixed | Pizza, no cheese, thin crust                                                                                    | 17 | 3   | D | 4 |
| 27515010 | 8000_Mixed | Steak sandwich, plain, on roll                                                                                  | 17 | 4   | B | 4 |
| 32202034 | 8000_Mixed | Egg, cheese, and sausage on bun                                                                                 | 17 | 2   | D | 4 |
| 27510585 | 8000_Mixed | Hamburger, 1 small patty, with condiments, on white bun                                                         | 17 | 3.5 | C | 4 |
| 27510231 | 8000_Mixed | Cheeseburger, 1 medium patty, with condiments, on bun, from fast food / restaurant (Burger King WHOPPER with    | 17 | 2   | D | 4 |
| 27510233 | 8000_Mixed | Cheeseburger, 1 medium patty, with condiments, on bun, from fast food / restaurant (Wendy's 1/4 lb Single with  | 17 | 2   | D | 4 |
| 27510446 | 8000_Mixed | Double bacon cheeseburger, 2 medium patties, plain, on bun, from fast food / restaurant                         | 17 | 2   | D | 4 |
| 27564303 | 8000_Mixed | Frankfurter or hot dog sandwich, reduced fat or light, plain, on whole grain white bun                          | 17 | 3   | C | 4 |
| 58146442 | 8000_Mixed | Pasta with cream sauce and seafood, home recipe                                                                 | 17 | 3   | B | 4 |
| 27510341 | 8000_Mixed | Bacon cheeseburger, 1 medium patty, with condiments, on white bun                                               | 17 | 2   | D | 4 |
| 28143210 | 8000_Mixed | Chicken in orange sauce with almond rice, diet frozen meal                                                      | 17 | 4   | B | 4 |
| 27520410 | 8000_Mixed | Cuban sandwich, with spread                                                                                     | 17 | 3.5 | C | 4 |
| 28110340 | 8000_Mixed | Salisbury steak with gravy, potatoes, vegetable, soup or macaroni and cheese, dessert, frozen meal              | 17 | 4   | B | 4 |
| 27564443 | 8000_Mixed | Frankfurter or hot dog sandwich, with chili, on whole grain white bun                                           | 17 | 3   | C | 4 |
| 58400200 | 8000_Mixed | Rice soup, NFS                                                                                                  | 17 | 3   | C | 4 |
| 58404010 | 8000_Mixed | Chicken or turkey rice soup, canned, or ready-to-serve                                                          | 17 | 3   | C | 4 |
| 58122320 | 8000_Mixed | Knish, cheese                                                                                                   | 17 | 2   | D | 4 |
| 58150520 | 8000_Mixed | Dukboki or Tteokbokki, Korean                                                                                   | 17 | 3.5 | B | 4 |
| 27130050 | 8000_Mixed | Lamb or mutton goulash                                                                                          | 17 | 4   | B | 4 |
| 27317010 | 8000_Mixed | Beef pot pie                                                                                                    | 17 | 3   | C | 4 |
| 27540151 | 8000_Mixed | Chicken fillet, breaded, fried, sandwich with cheese, lettuce, tomato and spread                                | 17 | 2   | D | 4 |
| 58162310 | 8000_Mixed | Rice pilaf                                                                                                      | 17 | 3   | C | 4 |
| 58101525 | 8000_Mixed | Taco or tostada with chicken and sour cream                                                                     | 17 | 3   | C | 4 |
| 58146443 | 8000_Mixed | Pasta with cream sauce and seafood, ready-to-heat                                                               | 17 | 3.5 | C | 4 |
| 14640100 | 8000_Mixed | Grilled cheese sandwich, NFS                                                                                    | 17 | 1   | E | 4 |
| 14640105 | 8000_Mixed | Grilled cheese sandwich, American cheese, on white bread                                                        | 17 | 1   | E | 4 |
| 58157300 | 8000_Mixed | Congee, with meat, poultry, and/or seafood                                                                      | 16 | 3.5 | A | 4 |
| 58133110 | 8000_Mixed | Manicotti, cheese-filled, no sauce                                                                              | 16 | 3   | D | 4 |
| 14640062 | 8000_Mixed | Cheese sandwich, reduced fat American cheese, on white bread, with butter                                       | 16 | 1.5 | D | 4 |
| 58160620 | 8000_Mixed | Rice, white, with dark green vegetables and tomatoes and/or tomato-based sauce, fat not added in cooking        | 16 | 4   | B | 4 |
| 58106725 | 8000_Mixed | Pizza with meat and vegetables, from restaurant or fast food, medium crust                                      | 16 | 3.5 | C | 4 |
| 27330050 | 8000_Mixed | Lamb or mutton, rice, and vegetables excluding carrots, broccoli, and dark-green leafy; gravy                   | 16 | 3.5 | B | 4 |
| 58101320 | 8000_Mixed | Taco or tostada with meat                                                                                       | 16 | 2   | D | 4 |
| 58145110 | 8000_Mixed | Macaroni or noodles with cheese                                                                                 | 16 | 3   | C | 4 |
| 58147510 | 8000_Mixed | Flavored pasta                                                                                                  | 16 | 3.5 | B | 4 |
| 32202050 | 8000_Mixed | Egg, cheese, and sausage on biscuit                                                                             | 16 | 1.5 | D | 4 |
| 27420470 | 8000_Mixed | Sausage and peppers, no sauce                                                                                   | 16 | 2   | D | 4 |
| 58100135 | 8000_Mixed | Burrito with meat and sour cream                                                                                | 16 | 2   | D | 4 |
| 58151170 | 8000_Mixed | Sushi roll, avocado                                                                                             | 16 | 3   | C | 3 |
| 58151230 | 8000_Mixed | Sushi roll, vegetable                                                                                           | 16 | 3   | C | 3 |
| 58302000 | 8000_Mixed | Macaroni and cheese, diet frozen meal                                                                           | 16 | 3.5 | B | 4 |
| 27510521 | 8000_Mixed | Hamburger, NFS                                                                                                  | 16 | 3.5 | C | 4 |
| 27510641 | 8000_Mixed | Hamburger, 1 medium patty, with condiments, on white bun                                                        | 16 | 3.5 | C | 4 |
| 27564243 | 8000_Mixed | Frankfurter or hot dog sandwich, chicken and/or turkey, plain, on whole grain white bun                         | 16 | 2   | D | 4 |
| 58124500 | 8000_Mixed | Pastry, filled with potatoes and peas, fried                                                                    | 16 | 2   | D | 4 |
| 27564361 | 8000_Mixed | Frankfurter or hot dog sandwich, fat free, plain, on wheat bun                                                  | 16 | 3.5 | B | 4 |
| 58101733 | 8000_Mixed | Taco or tostada with meat and beans, from fast food                                                             | 16 | 3.5 | B | 4 |
| 27242310 | 8000_Mixed | Chicken or turkey and noodles with cheese sauce                                                                 | 16 | 3.5 | B | 4 |
| 58109210 | 8000_Mixed | Breakfast pizza with egg                                                                                        | 16 | 2   | D | 4 |
| 58107232 | 8000_Mixed | White pizza, cheese, with meat and vegetables, thin crust                                                       | 16 | 2   | D | 4 |
| 75418220 | 8000_Mixed | Creamed christophine, Puerto Rican style                                                                        | 16 | 3.5 | C | 4 |
| 73304010 | 8000_Mixed | Squash fritter or cake                                                                                          | 16 | 3   | C | 4 |
| 14640020 | 8000_Mixed | Cheese sandwich, reduced fat Cheddar cheese, on white bread, no spread                                          | 16 | 2   | D | 4 |
| 27213000 | 8000_Mixed | Beef and rice, no sauce                                                                                         | 16 | 3.5 | B | 4 |
| 27135150 | 8000_Mixed | Veal cordon bleu                                                                                                | 16 | 2   | D | 4 |
| 14640155 | 8000_Mixed | Grilled cheese sandwich, reduced fat American cheese, on white bread                                            | 16 | 1.5 | D | 4 |
| 27515070 | 8000_Mixed | Steak and cheese submarine sandwich, with fried peppers and onions, on roll                                     | 16 | 3.5 | B | 4 |
| 58100100 | 8000_Mixed | Burrito with meat                                                                                               | 16 | 2   | D | 4 |
| 14640068 | 8000_Mixed | Cheese sandwich, reduced fat Cheddar cheese, on white bread, with butter                                        | 16 | 1.5 | D | 4 |
| 27564501 | 8000_Mixed | Frankfurter or hot dog sandwich, with meatless chili, on wheat bun                                              | 16 | 3   | C | 4 |
| 58101450 | 8000_Mixed | Soft taco with chicken                                                                                          | 16 | 3   | C | 4 |
| 27120030 | 8000_Mixed | Ham or pork with barbecue sauce                                                                                 | 16 | 3.5 | D | 4 |
| 58161710 | 8000_Mixed | Rice croquette                                                                                                  | 16 | 3.5 | C | 4 |
| 27515050 | 8000_Mixed | Fajita-style beef sandwich with cheese, on pita bread, with lettuce and tomato                                  | 16 | 3.5 | B | 4 |
| 75418000 | 8000_Mixed | Squash, summer, yellow or green, breaded or battered, baked                                                     | 16 | 4.5 | A | 4 |
| 27500300 | 8000_Mixed | Wrap sandwich, filled with meat, poultry, or fish, and vegetables                                               | 16 | 3.5 | C | 4 |
| 27118140 | 8000_Mixed | Stuffed pot roast, Puerto Rican style, NFS                                                                      | 16 | 1.5 | D | 4 |
| 58155110 | 8000_Mixed | Rice with chicken, Puerto Rican style                                                                           | 16 | 2   | D | 4 |
| 27520110 | 8000_Mixed | Bacon sandwich, with spread                                                                                     | 16 | 1.5 | D | 4 |
| 58304020 | 8000_Mixed | Spaghetti and meatballs with tomato sauce, sliced apples, bread, frozen meal                                    | 16 | 3.5 | C | 4 |
| 58160650 | 8000_Mixed | Rice, white, with carrots and dark green vegetables, fat not added in cooking                                   | 16 | 3.5 | B | 4 |
| 27220190 | 8000_Mixed | Sausage and noodles with cream or white sauce                                                                   | 16 | 3   | C | 4 |
| 27510205 | 8000_Mixed | Cheeseburger, 1 small patty, with condiments, on white bun                                                      | 15 | 3   | C | 4 |
| 27510401 | 8000_Mixed | Double cheeseburger, 2 medium patties, plain, on bun, from fast food / restaurant                               | 15 | 2   | D | 4 |
| 58101325 | 8000_Mixed | Taco or tostada with meat and sour cream                                                                        | 15 | 3.5 | C | 4 |
| 27564123 | 8000_Mixed | Frankfurter or hot dog sandwich, beef and pork, plain, on whole grain white bun                                 | 15 | 2   | D | 4 |
| 27510281 | 8000_Mixed | Bacon cheeseburger, 1 small patty, with condiments, on bun, from fast food / restaurant (Wendy's Jr. Bacon Chee | 15 | 2   | D | 4 |
| 27564520 | 8000_Mixed | Frankfurter or hot dog sandwich, with meatless chili, on wheat bread                                            | 15 | 3.5 | C | 4 |

Supplementary Table 8. Original (uncorrected) scores for all food items.

|          |            |                                                                                                                  |    |     |   |   |
|----------|------------|------------------------------------------------------------------------------------------------------------------|----|-----|---|---|
| 32202040 | 8000_Mixed | Egg, cheese, and beef on English Muffin                                                                          | 15 | 2   | D | 4 |
| 27520540 | 8000_Mixed | Ham and tomato club sandwich, with lettuce and spread                                                            | 15 | 3   | D | 4 |
| 32202025 | 8000_Mixed | Egg, cheese and ham on bagel                                                                                     | 15 | 2   | D | 4 |
| 58105105 | 8000_Mixed | Pupusa, bean-filled                                                                                              | 15 | 3.5 | A | 4 |
| 27560720 | 8000_Mixed | Sausage and spaghetti sauce sandwich                                                                             | 15 | 2   | D | 4 |
| 27515000 | 8000_Mixed | Steak submarine sandwich with lettuce and tomato                                                                 | 15 | 4   | B | 4 |
| 27510671 | 8000_Mixed | Double hamburger, 2 medium patties, plain, on bun, from fast food / restaurant                                   | 15 | 3   | D | 4 |
| 14640014 | 8000_Mixed | Cheese sandwich, reduced fat American cheese, on white bread, no spread                                          | 15 | 2   | D | 4 |
| 58163420 | 8000_Mixed | Spanish rice, fat not added in cooking                                                                           | 15 | 4   | B | 4 |
| 28110640 | 8000_Mixed | Meatballs, Swedish, in sauce, with noodles, frozen meal                                                          | 15 | 3   | C | 4 |
| 58134110 | 8000_Mixed | Stuffed shells, cheese-filled, no sauce                                                                          | 15 | 3   | C | 4 |
| 27520300 | 8000_Mixed | Ham sandwich, with spread                                                                                        | 15 | 2   | D | 4 |
| 14640185 | 8000_Mixed | Grilled cheese sandwich, reduced fat Cheddar cheese, on white bread                                              | 15 | 1.5 | D | 4 |
| 28141600 | 8000_Mixed | Chicken a la king with rice, frozen meal                                                                         | 15 | 3   | C | 4 |
| 58130013 | 8000_Mixed | Lasagna with meat, canned                                                                                        | 15 | 3.5 | B | 4 |
| 58131323 | 8000_Mixed | Ravioli, meat-filled, with tomato sauce or meat sauce, canned                                                    | 15 | 3.5 | B | 4 |
| 58100360 | 8000_Mixed | Chilaquiles, tortilla casserole with salsa, cheese, and egg                                                      | 15 | 3.5 | C | 4 |
| 58146433 | 8000_Mixed | Pasta with cream sauce, poultry, and added vegetables, ready-to-heat                                             | 15 | 3   | C | 4 |
| 58107222 | 8000_Mixed | White pizza, cheese, with meat, thin crust                                                                       | 15 | 2   | D | 4 |
| 27500200 | 8000_Mixed | Wrap sandwich, filled with meat, poultry, or fish, vegetables, and cheese                                        | 15 | 3   | D | 4 |
| 27510171 | 8000_Mixed | Cheeseburger, 1 small patty, with condiments, on bun, from fast food / restaurant (Burger King WHOPPER Jr. with  | 15 | 3   | C | 4 |
| 27510175 | 8000_Mixed | Cheeseburger, 1 small patty, with condiments, on bun, from fast food / restaurant (Wendy's Jr. Cheeseburger Del  | 15 | 3   | C | 4 |
| 58128000 | 8000_Mixed | Biscuit with gravy                                                                                               | 15 | 3   | C | 4 |
| 27515030 | 8000_Mixed | Steak and cheese sandwich, plain, on roll                                                                        | 15 | 3   | D | 4 |
| 27510552 | 8000_Mixed | Hamburger, 1 small patty, with condiments, on bun, from fast food / restaurant (Burger King WHOPPER Jr.)         | 15 | 3.5 | B | 4 |
| 58161200 | 8000_Mixed | Rice, cooked with coconut milk                                                                                   | 15 | 1.5 | D | 4 |
| 27510155 | 8000_Mixed | Cheeseburger, NFS                                                                                                | 15 | 3   | D | 4 |
| 27510251 | 8000_Mixed | Cheeseburger, 1 medium patty, with condiments, on white bun                                                      | 15 | 3   | D | 4 |
| 27120210 | 8000_Mixed | Frankfurter or hot dog, with chili, no bun                                                                       | 15 | 2   | D | 4 |
| 27564183 | 8000_Mixed | Frankfurter or hot dog sandwich, meat and poultry, plain, on whole grain white bun                               | 15 | 2   | D | 4 |
| 58100000 | 8000_Mixed | Burrito, taco, or quesadilla with egg                                                                            | 15 | 3   | D | 4 |
| 58165000 | 8000_Mixed | Rice, white, with vegetables, cheese and/or cream based sauce, NS as to fat added in cooking                     | 15 | 3.5 | B | 4 |
| 58165020 | 8000_Mixed | Rice, white, with vegetables, cheese and/or cream based sauce, fat added in cooking                              | 15 | 3.5 | B | 4 |
| 58107100 | 8000_Mixed | Pizza, no cheese, thick crust                                                                                    | 15 | 3   | C | 4 |
| 27510700 | 8000_Mixed | Meatball and spaghetti sauce submarine sandwich                                                                  | 15 | 3.5 | C | 4 |
| 58131590 | 8000_Mixed | Ravioli, cheese and spinach-filled, no sauce                                                                     | 15 | 3   | C | 4 |
| 58131330 | 8000_Mixed | Ravioli, meat-filled, with cream sauce                                                                           | 15 | 3   | C | 4 |
| 58107214 | 8000_Mixed | White pizza, cheese, with vegetables, thick crust                                                                | 15 | 3.5 | C | 4 |
| 27213200 | 8000_Mixed | Beef and rice with gravy                                                                                         | 15 | 3.5 | B | 4 |
| 58306020 | 8000_Mixed | Beef enchilada, chili gravy, rice, refried beans, frozen meal                                                    | 15 | 4   | B | 4 |
| 27564441 | 8000_Mixed | Frankfurter or hot dog sandwich, with chili, on wheat bun                                                        | 15 | 3   | C | 4 |
| 27564442 | 8000_Mixed | Frankfurter or hot dog sandwich, with chili, on whole wheat bun                                                  | 15 | 3   | C | 4 |
| 75604020 | 8000_Mixed | Corn soup, cream of, prepared with water                                                                         | 15 | 4   | B | 4 |
| 27220030 | 8000_Mixed | Ham and rice with mushroom sauce                                                                                 | 14 | 3   | C | 4 |
| 58100010 | 8000_Mixed | Burrito, taco, or quesadilla with egg and breakfast meat                                                         | 14 | 2   | D | 4 |
| 27520330 | 8000_Mixed | Ham and egg sandwich                                                                                             | 14 | 3.5 | C | 4 |
| 27520520 | 8000_Mixed | Pork sandwich                                                                                                    | 14 | 4   | B | 4 |
| 75414030 | 8000_Mixed | Mushrooms, batter-dipped, fried                                                                                  | 14 | 4   | B | 4 |
| 32202130 | 8000_Mixed | Egg and steak on biscuit                                                                                         | 14 | 2   | D | 4 |
| 58105100 | 8000_Mixed | Pupusa, cheese-filled                                                                                            | 14 | 3.5 | C | 4 |
| 14640056 | 8000_Mixed | Cheese sandwich, Cheddar cheese, on white bread, with butter                                                     | 14 | 1.5 | E | 4 |
| 58160470 | 8000_Mixed | Rice, white, with carrots, fat not added in cooking                                                              | 14 | 4   | B | 4 |
| 58134640 | 8000_Mixed | Tortellini, cheese-filled, meatless, with vinaigrette dressing                                                   | 14 | 3.5 | D | 4 |
| 27233000 | 8000_Mixed | Lamb or mutton and noodles with gravy                                                                            | 14 | 3.5 | B | 4 |
| 27564460 | 8000_Mixed | Frankfurter or hot dog sandwich, with chili, on wheat bread                                                      | 14 | 3.5 | C | 4 |
| 27510312 | 8000_Mixed | Bacon cheeseburger, 1 medium patty, with condiments, on bun, from fast food / restaurant                         | 14 | 1.5 | D | 4 |
| 58134650 | 8000_Mixed | Tortellini, meat-filled, no sauce                                                                                | 14 | 3.5 | C | 4 |
| 27540210 | 8000_Mixed | Wrap sandwich filled with breaded fried chicken strips, cheese, lettuce, and spread                              | 14 | 3   | D | 4 |
| 58134680 | 8000_Mixed | Tortellini, cheese-filled, no sauce                                                                              | 14 | 4   | A | 4 |
| 58101460 | 8000_Mixed | Soft taco with chicken and sour cream                                                                            | 14 | 3   | C | 4 |
| 58160590 | 8000_Mixed | Rice, white, with carrots and tomatoes and/or tomato-based sauce, fat not added in cooking                       | 14 | 4   | B | 4 |
| 58104740 | 8000_Mixed | Quesadilla with chicken                                                                                          | 14 | 1.5 | D | 4 |
| 58126280 | 8000_Mixed | Turnover, chicken- or turkey-, and vegetable-filled, lower in fat                                                | 14 | 3.5 | A | 4 |
| 58116130 | 8000_Mixed | Empanada, Mexican turnover, filled with chicken and vegetables                                                   | 14 | 3   | C | 4 |
| 58160680 | 8000_Mixed | Rice, white, with carrots, dark green vegetables, and tomatoes and/or tomato-based sauce, fat not added in cooki | 14 | 4   | B | 4 |
| 58107234 | 8000_Mixed | White pizza, cheese, with meat and vegetables, thick crust                                                       | 14 | 2   | D | 4 |
| 28140320 | 8000_Mixed | Chicken and noodles with vegetable, dessert, frozen meal                                                         | 14 | 3.5 | C | 4 |
| 27520380 | 8000_Mixed | Ham and cheese on English muffin                                                                                 | 14 | 1.5 | D | 4 |
| 58145112 | 8000_Mixed | Macaroni or noodles with cheese, made from packaged mix                                                          | 14 | 3   | C | 4 |
| 14640008 | 8000_Mixed | Cheese sandwich, Cheddar cheese, on white bread, no spread                                                       | 14 | 1.5 | D | 4 |
| 14640125 | 8000_Mixed | Grilled cheese sandwich, Cheddar cheese, on white bread                                                          | 14 | 1.5 | E | 4 |
| 58104770 | 8000_Mixed | Quesadilla with vegetables and chicken                                                                           | 14 | 2   | D | 4 |
| 58101345 | 8000_Mixed | Soft taco with meat                                                                                              | 14 | 3.5 | D | 4 |
| 27213120 | 8000_Mixed | Porcupine balls with tomato-based sauce                                                                          | 14 | 3.5 | C | 4 |
| 27540200 | 8000_Mixed | Fajita-style chicken sandwich with cheese, on pita bread, with lettuce and tomato                                | 14 | 3.5 | C | 4 |
| 58106610 | 8000_Mixed | Pizza with meat other than pepperoni, from restaurant or fast food, NS as to type of crust                       | 14 | 2   | D | 4 |
| 58106625 | 8000_Mixed | Pizza with meat other than pepperoni, from restaurant or fast food, medium crust                                 | 14 | 2   | D | 4 |
| 27564380 | 8000_Mixed | Frankfurter or hot dog sandwich, fat free, plain, on wheat bread                                                 | 14 | 3.5 | C | 4 |
| 27212050 | 8000_Mixed | Beef and macaroni with cheese sauce                                                                              | 14 | 3.5 | B | 4 |
| 27515040 | 8000_Mixed | Steak and cheese submarine sandwich, plain, on roll                                                              | 14 | 3.5 | D | 4 |
| 58104760 | 8000_Mixed | Quesadilla with vegetables and meat                                                                              | 14 | 2   | D | 4 |
| 58164210 | 8000_Mixed | Rice dessert or salad with fruit                                                                                 | 14 | 3.5 | C | 4 |
| 58104730 | 8000_Mixed | Quesadilla with meat                                                                                             | 14 | 1.5 | D | 4 |
| 27515080 | 8000_Mixed | Steak sandwich, plain, on biscuit                                                                                | 14 | 3   | C | 4 |
| 28140710 | 8000_Mixed | Chicken, fried, with potatoes, vegetable, frozen meal                                                            | 14 | 4   | C | 4 |
| 58127500 | 8000_Mixed | Vegetable submarine sandwich, with fat free spread                                                               | 14 | 4   | B | 4 |

Supplementary Table 8. Original (uncorrected) scores for all food items.

|          |            |                                                                                                              |    |     |   |   |
|----------|------------|--------------------------------------------------------------------------------------------------------------|----|-----|---|---|
| 27116350 | 8000_Mixed | Stewed seasoned ground beef, Mexican style                                                                   | 14 | 3.5 | C | 4 |
| 27510261 | 8000_Mixed | Cheeseburger, 1 large patty, plain, on bun, from fast food / restaurant                                      | 14 | 2   | D | 4 |
| 58104720 | 8000_Mixed | Quesadilla, just cheese, from fast food                                                                      | 14 | 1.5 | D | 4 |
| 58160530 | 8000_Mixed | Rice, white, with tomatoes and/or tomato-based sauce, fat not added in cooking                               | 13 | 4   | B | 4 |
| 27564301 | 8000_Mixed | Frankfurter or hot dog sandwich, reduced fat or light, plain, on wheat bun                                   | 13 | 3.5 | C | 4 |
| 58145119 | 8000_Mixed | Macaroni or noodles with cheese, made from reduced fat packaged mix                                          | 13 | 3.5 | B | 4 |
| 28345010 | 8000_Mixed | Chicken or turkey soup, cream of, canned, reduced sodium, NS as to made with milk or water                   | 13 | 3.5 | B | 4 |
| 28345030 | 8000_Mixed | Chicken or turkey soup, cream of, canned, reduced sodium, made with water                                    | 13 | 3.5 | B | 4 |
| 58104750 | 8000_Mixed | Quesadilla with vegetables                                                                                   | 13 | 2   | D | 4 |
| 27564241 | 8000_Mixed | Frankfurter or hot dog sandwich, chicken and/or turkey, plain, on wheat bun                                  | 13 | 2   | D | 4 |
| 58146432 | 8000_Mixed | Pasta with cream sauce, poultry, and added vegetables, home recipe                                           | 13 | 3.5 | B | 4 |
| 27520310 | 8000_Mixed | Ham sandwich with lettuce and spread                                                                         | 13 | 3   | C | 4 |
| 27345440 | 8000_Mixed | Chicken or turkey, rice, and vegetables including carrots, broccoli, and/or dark-green leafy; cheese sauce   | 13 | 3.5 | B | 4 |
| 27510371 | 8000_Mixed | Double cheeseburger, 2 small patties, plain, on bun, from fast food / restaurant                             | 13 | 2   | D | 4 |
| 27116200 | 8000_Mixed | Beef with barbecue sauce                                                                                     | 13 | 3.5 | C | 4 |
| 27510145 | 8000_Mixed | Cheeseburger, 1 miniature patty, with condiments, on miniature bun, from fast food / restaurant              | 13 | 2   | D | 4 |
| 27517000 | 8000_Mixed | Wrap sandwich filled with beef patty, cheese and spread and/or sauce                                         | 13 | 2   | D | 4 |
| 27513050 | 8000_Mixed | Roast beef sandwich with cheese                                                                              | 13 | 1.5 | D | 4 |
| 58108010 | 8000_Mixed | Calzone, with meat and cheese                                                                                | 13 | 2   | D | 4 |
| 58126140 | 8000_Mixed | Turnover, meat- and bean-filled, no gravy                                                                    | 13 | 2   | D | 4 |
| 27510331 | 8000_Mixed | Bacon cheeseburger, 1 medium patty, plain, on white bun                                                      | 13 | 2   | D | 4 |
| 32202035 | 8000_Mixed | Egg, extra cheese, and extra sausage, on bun                                                                 | 13 | 1.5 | D | 4 |
| 58407010 | 8000_Mixed | Instant soup, noodle                                                                                         | 13 | 3.5 | B | 4 |
| 58106705 | 8000_Mixed | Pizza with meat and vegetables, from frozen, thick crust                                                     | 13 | 2   | D | 4 |
| 58101350 | 8000_Mixed | Soft taco with meat and sour cream                                                                           | 13 | 3   | C | 4 |
| 58107224 | 8000_Mixed | White pizza, cheese, with meat, thick crust                                                                  | 13 | 2   | D | 4 |
| 27510486 | 8000_Mixed | Triple cheeseburger, 3 medium patties, with condiments, on bun, from fast food / restaurant                  | 13 | 2   | D | 4 |
| 58131535 | 8000_Mixed | Ravioli, cheese-filled, with cream sauce                                                                     | 13 | 3   | C | 4 |
| 27510506 | 8000_Mixed | Hamburger, 1 miniature patty, with condiments, on miniature bun, from fast food / restaurant                 | 13 | 3.5 | C | 4 |
| 58145113 | 8000_Mixed | Macaroni or noodles with cheese, canned                                                                      | 13 | 3.5 | B | 4 |
| 27515020 | 8000_Mixed | Steak and cheese submarine sandwich, with lettuce and tomato                                                 | 13 | 3.5 | B | 4 |
| 58104535 | 8000_Mixed | Chimichanga with meat and sour cream                                                                         | 13 | 2   | D | 4 |
| 27510235 | 8000_Mixed | Cheeseburger submarine sandwich with lettuce, tomato and spread                                              | 13 | 3.5 | B | 4 |
| 58146413 | 8000_Mixed | Pasta with cream sauce, meat, and added vegetables, ready-to-heat                                            | 13 | 3   | C | 4 |
| 27560410 | 8000_Mixed | Puerto Rican sandwich                                                                                        | 13 | 1.5 | D | 4 |
| 58155810 | 8000_Mixed | Stewed rice, Puerto Rican style                                                                              | 13 | 3.5 | C | 4 |
| 27564003 | 8000_Mixed | Frankfurter or hot dog sandwich, NFS, plain, on whole grain white bun                                        | 13 | 1.5 | D | 4 |
| 27564063 | 8000_Mixed | Frankfurter or hot dog sandwich, beef, plain, on whole grain white bun                                       | 13 | 1.5 | D | 4 |
| 58101457 | 8000_Mixed | Soft taco with chicken, from fast food                                                                       | 13 | 3.5 | C | 4 |
| 27113300 | 8000_Mixed | Swedish meatballs with cream or white sauce                                                                  | 13 | 3   | D | 4 |
| 27510631 | 8000_Mixed | Hamburger, 1 medium patty, plain, on white bun                                                               | 13 | 3.5 | D | 4 |
| 27230010 | 8000_Mixed | Lamb or mutton loaf                                                                                          | 13 | 3   | D | 4 |
| 58126310 | 8000_Mixed | Turnover, chicken, with gravy                                                                                | 13 | 3   | D | 4 |
| 27560705 | 8000_Mixed | Sausage balls, made with biscuit mix and cheese                                                              | 13 | 0.5 | E | 4 |
| 58107207 | 8000_Mixed | White pizza, cheese, thick crust                                                                             | 13 | 3   | C | 4 |
| 58145117 | 8000_Mixed | Macaroni or noodles with cheese, Easy Mac type                                                               | 13 | 3.5 | B | 4 |
| 27510305 | 8000_Mixed | Bacon cheeseburger, 1 medium patty, plain, on bun, from fast food / restaurant                               | 12 | 1.5 | D | 4 |
| 27510606 | 8000_Mixed | Hamburger, 1 medium patty, with condiments, on bun, from fast food / restaurant                              | 12 | 3.5 | C | 4 |
| 27510575 | 8000_Mixed | Hamburger, 1 small patty, plain, on white bun                                                                | 12 | 3.5 | C | 4 |
| 58101323 | 8000_Mixed | Taco or tostada with meat, from fast food                                                                    | 12 | 3.5 | B | 4 |
| 27320020 | 8000_Mixed | Ham pot pie                                                                                                  | 12 | 3   | C | 4 |
| 58100370 | 8000_Mixed | Chilaquiles, tortilla casserole with salsa and cheese, no egg                                                | 12 | 3.5 | C | 4 |
| 58164110 | 8000_Mixed | Rice with raisins                                                                                            | 12 | 3   | C | 4 |
| 27220120 | 8000_Mixed | Sausage and rice with tomato-based sauce                                                                     | 12 | 3   | C | 4 |
| 27510241 | 8000_Mixed | Cheeseburger, 1 medium patty, plain, on white bun                                                            | 12 | 2   | D | 4 |
| 27510661 | 8000_Mixed | Double hamburger, 2 small patties, plain, on bun, from fast food / restaurant                                | 12 | 3   | D | 4 |
| 27564504 | 8000_Mixed | Frankfurter or hot dog sandwich, with meatless chili, on multigrain bun                                      | 12 | 3   | C | 4 |
| 58160500 | 8000_Mixed | Rice, white, with peas and carrots, fat not added in cooking                                                 | 12 | 4   | B | 4 |
| 27560510 | 8000_Mixed | Salami sandwich, with spread                                                                                 | 12 | 2   | D | 4 |
| 74203010 | 8000_Mixed | Tomatoes, NS as to form, scalloped                                                                           | 12 | 4   | C | 4 |
| 58126180 | 8000_Mixed | Turnover, meat-, potato-, and vegetable-filled, no gravy                                                     | 12 | 3   | C | 4 |
| 32202000 | 8000_Mixed | Egg, cheese, ham, and bacon on bun                                                                           | 12 | 1.5 | D | 4 |
| 51182010 | 8000_Mixed | Bread stuffing                                                                                               | 12 | 3.5 | C | 4 |
| 58116120 | 8000_Mixed | Empanada, Mexican turnover, filled with meat and vegetables                                                  | 12 | 3.5 | D | 4 |
| 58126170 | 8000_Mixed | Turnover filled with meat and vegetable, no potatoes, no gravy                                               | 12 | 3   | C | 4 |
| 27345450 | 8000_Mixed | Chicken or turkey, rice, and vegetables excluding carrots, broccoli, and dark-green leafy; cheese sauce      | 12 | 3.5 | B | 4 |
| 27513060 | 8000_Mixed | Roast beef sandwich with bacon and cheese sauce                                                              | 12 | 1.5 | D | 4 |
| 71801020 | 8000_Mixed | Potato soup, prepared with water                                                                             | 12 | 4   | C | 4 |
| 27243700 | 8000_Mixed | Chicken in cheese sauce with Spanish rice                                                                    | 12 | 3.5 | C | 4 |
| 58104710 | 8000_Mixed | Quesadilla, just cheese, meatless                                                                            | 12 | 1.5 | D | 4 |
| 27510195 | 8000_Mixed | Cheeseburger, 1 small patty, plain, on white bun                                                             | 12 | 2   | D | 4 |
| 27510475 | 8000_Mixed | Double bacon cheeseburger, 2 large patties, with condiments, on bun, from fast food / restaurant             | 12 | 1.5 | D | 4 |
| 27213420 | 8000_Mixed | Porcupine balls with mushroom sauce                                                                          | 12 | 3   | C | 4 |
| 58131530 | 8000_Mixed | Ravioli, cheese-filled, with meat sauce                                                                      | 12 | 3   | C | 4 |
| 27513020 | 8000_Mixed | Roast beef sandwich, with gravy                                                                              | 12 | 3   | C | 4 |
| 27510225 | 8000_Mixed | Cheeseburger, 1 medium patty, with condiments, on bun, from fast food / restaurant                           | 12 | 2   | D | 4 |
| 27510232 | 8000_Mixed | Cheeseburger, 1 medium patty, with condiments, on bun, from fast food / restaurant (McDonald's Quarter Pound | 12 | 2   | D | 4 |
| 58164530 | 8000_Mixed | Rice, white, with gravy, NS as to fat added in cooking                                                       | 12 | 3   | C | 4 |
| 58164550 | 8000_Mixed | Rice, white, with gravy, fat added in cooking                                                                | 12 | 3   | C | 4 |
| 58103310 | 8000_Mixed | Tamale casserole with meat                                                                                   | 12 | 3.5 | B | 4 |
| 58310210 | 8000_Mixed | Sausage and french toast, frozen meal                                                                        | 12 | 3   | C | 4 |
| 27211400 | 8000_Mixed | Corned beef hash                                                                                             | 12 | 3.5 | C | 4 |
| 27214500 | 8000_Mixed | Corned beef patty                                                                                            | 12 | 3.5 | C | 4 |
| 27260110 | 8000_Mixed | Hash, NS as to type of meat                                                                                  | 12 | 3.5 | C | 4 |
| 27513070 | 8000_Mixed | Roast beef submarine sandwich, on roll, au jus                                                               | 11 | 3.5 | C | 4 |
| 27315330 | 8000_Mixed | Beef, rice, and vegetables including carrots, broccoli, and/or dark-green leafy; cheese sauce                | 11 | 3.5 | B | 4 |

Supplementary Table 8. Original (uncorrected) scores for all food items.

|          |            |                                                                                                                  |    |     |   |   |
|----------|------------|------------------------------------------------------------------------------------------------------------------|----|-----|---|---|
| 27213300 | 8000_Mixed | Beef and rice with cream sauce                                                                                   | 11 | 3.5 | B | 4 |
| 27510531 | 8000_Mixed | Hamburger, 1 small patty, plain, on bun, from fast food / restaurant                                             | 11 | 3.5 | C | 4 |
| 27510601 | 8000_Mixed | Hamburger, 1 medium patty, plain, on bun, from fast food / restaurant                                            | 11 | 3.5 | C | 4 |
| 27510215 | 8000_Mixed | Cheeseburger, 1 medium patty, plain, on bun, from fast food / restaurant                                         | 11 | 2   | D | 4 |
| 27564260 | 8000_Mixed | Frankfurter or hot dog sandwich, chicken and/or turkey, plain, on wheat bread                                    | 11 | 2   | D | 4 |
| 27564121 | 8000_Mixed | Frankfurter or hot dog sandwich, beef and pork, plain, on wheat bun                                              | 11 | 2   | D | 4 |
| 58146393 | 8000_Mixed | Pasta with cream sauce and added vegetables, ready-to-heat                                                       | 11 | 3   | C | 4 |
| 27513010 | 8000_Mixed | Roast beef sandwich                                                                                              | 11 | 2   | D | 4 |
| 58127330 | 8000_Mixed | Croissant sandwich with sausage, egg, and cheese                                                                 | 11 | 1.5 | D | 4 |
| 58104800 | 8000_Mixed | Taquito or flauta with cheese                                                                                    | 11 | 3.5 | B | 4 |
| 28110380 | 8000_Mixed | Salisbury steak with gravy, macaroni and cheese, frozen meal                                                     | 11 | 3.5 | C | 4 |
| 75411020 | 8000_Mixed | Corn fritter                                                                                                     | 11 | 2   | D | 4 |
| 27160010 | 8000_Mixed | Meat with barbecue sauce, NS as to type of meat                                                                  | 11 | 3.5 | C | 4 |
| 27510276 | 8000_Mixed | Bacon cheeseburger, 1 small patty, with condiments, on bun, from fast food / restaurant                          | 11 | 2   | D | 4 |
| 27564444 | 8000_Mixed | Frankfurter or hot dog sandwich, with chili, on multigrain bun                                                   | 11 | 3   | C | 4 |
| 58145160 | 8000_Mixed | Macaroni or noodles with cheese and frankfurters or hot dogs                                                     | 11 | 3.5 | C | 4 |
| 58146412 | 8000_Mixed | Pasta with cream sauce, meat, and added vegetables, home recipe                                                  | 11 | 3.5 | B | 4 |
| 27564181 | 8000_Mixed | Frankfurter or hot dog sandwich, meat and poultry, plain, on wheat bun                                           | 11 | 2   | D | 4 |
| 27510376 | 8000_Mixed | Double cheeseburger, 2 small patties, with condiments, on bun, from fast food / restaurant                       | 11 | 2   | D | 4 |
| 27510386 | 8000_Mixed | Double cheeseburger, 2 small patties, with condiments, on bun, from fast food / restaurant (Burger King Double C | 11 | 2   | D | 4 |
| 27510387 | 8000_Mixed | Double cheeseburger, 2 small patties, with condiments, on bun, from fast food / restaurant (McDonald's Double C  | 11 | 2   | D | 4 |
| 27510388 | 8000_Mixed | Double cheeseburger, 2 small patties, with condiments, on bun, from fast food / restaurant (McDonald's McDoub    | 11 | 2   | D | 4 |
| 27510391 | 8000_Mixed | Double cheeseburger, 2 small patties, with condiments, on bun, from fast food / restaurant (Wendy's Double Stac  | 11 | 2   | D | 4 |
| 28141201 | 8000_Mixed | Teriyaki chicken with rice and vegetable, diet frozen meal                                                       | 11 | 3.5 | B | 4 |
| 58146423 | 8000_Mixed | Pasta with cream sauce and poultry, ready-to-heat                                                                | 11 | 3.5 | C | 4 |
| 58163510 | 8000_Mixed | Rice dressing                                                                                                    | 11 | 3   | C | 4 |
| 27510406 | 8000_Mixed | Double cheeseburger, 2 medium patties, with condiments, on bun, from fast food / restaurant                      | 11 | 2   | D | 4 |
| 27510412 | 8000_Mixed | Double cheeseburger, 2 medium patties, with condiments, on bun, from fast food / restaurant (McDonald's Doubl    | 11 | 2   | D | 4 |
| 27510413 | 8000_Mixed | Double cheeseburger, 2 medium patties, with condiments, on bun, from fast food / restaurant (Wendy's 1/2 lb Dc   | 11 | 2   | D | 4 |
| 27564510 | 8000_Mixed | Frankfurter or hot dog sandwich, with meatless chili, on white bread                                             | 11 | 2   | D | 4 |
| 27564140 | 8000_Mixed | Frankfurter or hot dog sandwich, beef and pork, plain, on wheat bread                                            | 11 | 1.5 | D | 4 |
| 32201000 | 8000_Mixed | Fried egg sandwich                                                                                               | 11 | 3.5 | B | 4 |
| 58126160 | 8000_Mixed | Turnover, cheese-filled, tomato-based sauce                                                                      | 11 | 1.5 | D | 4 |
| 27510536 | 8000_Mixed | Hamburger, 1 small patty, with condiments, on bun, from fast food / restaurant                                   | 11 | 3   | C | 4 |
| 27510551 | 8000_Mixed | Hamburger, 1 small patty, with condiments, on bun, from fast food / restaurant (Burger King Hamburger)           | 11 | 3   | C | 4 |
| 27510553 | 8000_Mixed | Hamburger, 1 small patty, with condiments, on bun, from fast food / restaurant (McDonald's Hamburger)            | 11 | 3   | C | 4 |
| 27510555 | 8000_Mixed | Hamburger, 1 small patty, with condiments, on bun, from fast food / restaurant (Wendy's Jr. Hamburger)           | 11 | 3   | C | 4 |
| 27120110 | 8000_Mixed | Sausage with tomato-based sauce                                                                                  | 11 | 1.5 | D | 4 |
| 27520420 | 8000_Mixed | Midnight sandwich, with spread                                                                                   | 11 | 3.5 | D | 4 |
| 58156310 | 8000_Mixed | Rice with Spanish sausage, Puerto Rican style                                                                    | 11 | 1.5 | D | 4 |
| 27564200 | 8000_Mixed | Frankfurter or hot dog sandwich, meat and poultry, plain, on wheat bread                                         | 11 | 2   | D | 4 |
| 27564320 | 8000_Mixed | Frankfurter or hot dog sandwich, reduced fat or light, plain, on wheat bread                                     | 11 | 3.5 | C | 4 |
| 58126270 | 8000_Mixed | Turnover, chicken- or turkey-, and cheese-filled, no gravy                                                       | 11 | 3.5 | B | 4 |
| 58128250 | 8000_Mixed | Dressing with meat and vegetables                                                                                | 11 | 2   | D | 4 |
| 32202085 | 8000_Mixed | Egg, cheese and bacon on bagel                                                                                   | 11 | 3   | D | 4 |
| 27564500 | 8000_Mixed | Frankfurter or hot dog sandwich, with meatless chili, on white bun                                               | 10 | 3   | C | 4 |
| 27500050 | 8000_Mixed | Sandwich, NFS                                                                                                    | 10 | 2   | D | 4 |
| 27500100 | 8000_Mixed | Meat sandwich, NFS                                                                                               | 10 | 2   | D | 4 |
| 27560110 | 8000_Mixed | Bologna sandwich, with spread                                                                                    | 10 | 2   | D | 4 |
| 58100017 | 8000_Mixed | Burrito, taco, or quesadilla with egg, potato, and breakfast meat, from fast food                                | 10 | 2   | D | 4 |
| 58101800 | 8000_Mixed | Ground beef with tomato sauce and taco seasonings on a cornbread crust                                           | 10 | 3   | C | 4 |
| 28110330 | 8000_Mixed | Salisbury steak with gravy, whipped potatoes, vegetable, dessert, frozen meal                                    | 10 | 3   | C | 4 |
| 58163310 | 8000_Mixed | Flavored rice mixture                                                                                            | 10 | 3   | C | 4 |
| 27510140 | 8000_Mixed | Cheeseburger, 1 miniature patty, plain, on miniature bun, from fast food / restaurant                            | 10 | 2   | D | 4 |
| 58146392 | 8000_Mixed | Pasta with cream sauce and added vegetables, from home recipe                                                    | 10 | 3   | C | 4 |
| 58146200 | 8000_Mixed | Pasta, meat-filled, with gravy, canned                                                                           | 10 | 3   | B | 4 |
| 27520530 | 8000_Mixed | Pork sandwich, with gravy                                                                                        | 10 | 3.5 | B | 4 |
| 58126000 | 8000_Mixed | Turnover filled with ground beef and cabbage                                                                     | 10 | 3.5 | A | 4 |
| 58150510 | 8000_Mixed | Rice, fried, with shrimp                                                                                         | 10 | 3.5 | B | 4 |
| 58131100 | 8000_Mixed | Ravioli, NS as to filling, no sauce                                                                              | 10 | 3.5 | C | 4 |
| 58164560 | 8000_Mixed | Rice, white, with soy-based sauce, NS as to fat added in cooking                                                 | 10 | 3   | C | 4 |
| 58164580 | 8000_Mixed | Rice, white, with soy-based sauce, fat added in cooking                                                          | 10 | 3   | C | 4 |
| 27418310 | 8000_Mixed | Corned beef with tomato sauce and onion, Puerto Rican style                                                      | 10 | 2   | D | 4 |
| 27510160 | 8000_Mixed | Cheeseburger, 1 small patty, plain, on bun, from fast food / restaurant                                          | 10 | 2   | D | 4 |
| 58101357 | 8000_Mixed | Soft taco with meat and sour cream, from fast food                                                               | 10 | 3   | C | 4 |
| 27315340 | 8000_Mixed | Beef, rice, and vegetables excluding carrots, broccoli, and dark-green leafy; cheese sauce                       | 10 | 3.5 | B | 4 |
| 58131523 | 8000_Mixed | Ravioli, cheese-filled, with tomato sauce, canned                                                                | 10 | 4   | B | 4 |
| 27564450 | 8000_Mixed | Frankfurter or hot dog sandwich, with chili, on white bread                                                      | 10 | 2   | D | 4 |
| 58101347 | 8000_Mixed | Soft taco with meat, from fast food                                                                              | 10 | 3   | C | 4 |
| 58146422 | 8000_Mixed | Pasta with cream sauce and poultry, home recipe                                                                  | 9  | 3.5 | B | 4 |
| 28140810 | 8000_Mixed | Chicken, fried, with potatoes, vegetable, dessert, frozen meal                                                   | 9  | 4   | B | 4 |
| 58160410 | 8000_Mixed | Rice, white, with corn, fat not added in cooking                                                                 | 9  | 4   | B | 4 |
| 58163380 | 8000_Mixed | Flavored rice and pasta mixture                                                                                  | 9  | 3   | C | 4 |
| 27510501 | 8000_Mixed | Hamburger, 1 miniature patty, plain, on miniature bun, from fast food / restaurant                               | 9  | 3.5 | C | 4 |
| 27564001 | 8000_Mixed | Frankfurter or hot dog sandwich, NFS, plain, on wheat bun                                                        | 9  | 1.5 | D | 4 |
| 27564061 | 8000_Mixed | Frankfurter or hot dog sandwich, beef, plain, on wheat bun                                                       | 9  | 1.5 | D | 4 |
| 27520170 | 8000_Mixed | Bacon on biscuit                                                                                                 | 9  | 1.5 | D | 4 |
| 27564440 | 8000_Mixed | Frankfurter or hot dog sandwich, with chili, on white bun                                                        | 9  | 3   | C | 4 |
| 58105110 | 8000_Mixed | Pupusa, meat-filled                                                                                              | 9  | 3.5 | B | 4 |
| 58103200 | 8000_Mixed | Tamale, plain, meatless, no sauce, Puerto Rican style or Caribbean Style                                         | 9  | 3.5 | D | 4 |
| 58146403 | 8000_Mixed | Pasta with cream sauce and meat, ready-to-heat                                                                   | 9  | 3.5 | C | 4 |
| 27560710 | 8000_Mixed | Sausage sandwich                                                                                                 | 9  | 2   | D | 4 |
| 27564020 | 8000_Mixed | Frankfurter or hot dog sandwich, NFS, plain, on wheat bread                                                      | 9  | 1.5 | D | 4 |
| 27564080 | 8000_Mixed | Frankfurter or hot dog sandwich, beef, plain, on wheat bread                                                     | 9  | 1.5 | D | 4 |
| 58116115 | 8000_Mixed | Empanada, Mexican turnover, filled with cheese and vegetables                                                    | 9  | 2   | D | 4 |
| 58306500 | 8000_Mixed | Chicken burritos, diet frozen meal                                                                               | 9  | 1.5 | D | 4 |



Supplementary Table 8. Original (uncorrected) scores for all food items.

|          |            |                                                                                                                |   |     |   |   |
|----------|------------|----------------------------------------------------------------------------------------------------------------|---|-----|---|---|
| 58126300 | 8000_Mixed | Turnover, meat- and cheese-filled, tomato-based sauce, lower in fat                                            | 9 | 3   | B | 4 |
| 58108050 | 8000_Mixed | Pizza rolls                                                                                                    | 9 | 2   | D | 4 |
| 58121620 | 8000_Mixed | Dumpling, vegetable                                                                                            | 8 | 3   | C | 4 |
| 27510165 | 8000_Mixed | Cheeseburger, 1 small patty, with condiments, on bun, from fast food / restaurant                              | 8 | 2   | D | 4 |
| 27510170 | 8000_Mixed | Cheeseburger, 1 small patty, with condiments, on bun, from fast food / restaurant (Burger King Cheeseburger)   | 8 | 2   | D | 4 |
| 27510172 | 8000_Mixed | Cheeseburger, 1 small patty, with condiments, on bun, from fast food / restaurant (McDonald's Cheeseburger)    | 8 | 2   | D | 4 |
| 27510173 | 8000_Mixed | Cheeseburger, 1 small patty, with condiments, on bun, from fast food / restaurant (Wendy's Kid's Cheeseburger) | 8 | 2   | D | 4 |
| 27510174 | 8000_Mixed | Cheeseburger, 1 small patty, with condiments, on bun, from fast food / restaurant (Wendy's Jr. Cheeseburger)   | 8 | 2   | D | 4 |
| 28345120 | 8000_Mixed | Chicken or turkey soup, cream of, prepared with milk                                                           | 8 | 3   | C | 4 |
| 74604100 | 8000_Mixed | Tomato beef rice soup, prepared with water                                                                     | 8 | 3.5 | C | 4 |
| 58145136 | 8000_Mixed | Macaroni or noodles with cheese and meat, prepared from Hamburger Helper mix                                   | 8 | 3.5 | B | 4 |
| 58103120 | 8000_Mixed | Tamale with meat                                                                                               | 8 | 3   | B | 4 |
| 58126110 | 8000_Mixed | Turnover, meat-filled, no gravy                                                                                | 8 | 2   | D | 4 |
| 58165010 | 8000_Mixed | Rice, white, with vegetables, cheese and/or cream based sauce, fat not added in cooking                        | 8 | 3.5 | B | 4 |
| 28310330 | 8000_Mixed | Pho                                                                                                            | 8 | 3.5 | B | 4 |
| 58165040 | 8000_Mixed | Rice, white, with vegetables and gravy, fat not added in cooking                                               | 8 | 4   | B | 4 |
| 32202060 | 8000_Mixed | Egg and sausage on biscuit                                                                                     | 8 | 1.5 | D | 4 |
| 58121510 | 8000_Mixed | Dumpling, meat-filled                                                                                          | 8 | 2   | D | 4 |
| 58146383 | 8000_Mixed | Pasta with cream sauce, ready-to-heat                                                                          | 8 | 3.5 | C | 4 |
| 27564364 | 8000_Mixed | Frankfurter or hot dog sandwich, fat free, plain, on multigrain bun                                            | 8 | 3.5 | B | 4 |
| 27564244 | 8000_Mixed | Frankfurter or hot dog sandwich, chicken and/or turkey, plain, on multigrain bun                               | 8 | 2   | D | 4 |
| 74603010 | 8000_Mixed | Tomato beef soup, prepared with water                                                                          | 8 | 3.5 | C | 4 |
| 74604010 | 8000_Mixed | Tomato beef noodle soup, prepared with water                                                                   | 8 | 3.5 | C | 4 |
| 58131310 | 8000_Mixed | Ravioli, meat-filled, no sauce                                                                                 | 8 | 3   | D | 4 |
| 58127310 | 8000_Mixed | Croissant sandwich with ham, egg, and cheese                                                                   | 8 | 1.5 | D | 4 |
| 58164500 | 8000_Mixed | Rice, white, with cheese and/or cream based sauce, NS as to fat added in cooking                               | 7 | 3   | C | 4 |
| 58164520 | 8000_Mixed | Rice, white, with cheese and/or cream based sauce, fat added in cooking                                        | 7 | 3   | C | 4 |
| 58100013 | 8000_Mixed | Burrito, taco, or quesadilla with egg and breakfast meat, from fast food                                       | 7 | 1.5 | D | 4 |
| 58103130 | 8000_Mixed | Tamale with chicken                                                                                            | 7 | 3   | D | 4 |
| 58146402 | 8000_Mixed | Pasta with cream sauce and meat, home recipe                                                                   | 7 | 3   | C | 4 |
| 27520500 | 8000_Mixed | Pork sandwich, on white roll, with onions, dill pickles and barbecue sauce                                     | 7 | 3   | C | 4 |
| 58104905 | 8000_Mixed | Taquito or flauta with egg and breakfast meat                                                                  | 7 | 2   | D | 4 |
| 27564184 | 8000_Mixed | Frankfurter or hot dog sandwich, meat and poultry, plain, on multigrain bun                                    | 7 | 2   | D | 4 |
| 58126130 | 8000_Mixed | Turnover, meat- and cheese-filled, no gravy                                                                    | 7 | 3   | C | 4 |
| 32202020 | 8000_Mixed | Egg, cheese, and ham on biscuit                                                                                | 7 | 1.5 | D | 4 |
| 58160710 | 8000_Mixed | Rice, white, with other vegetables, fat not added in cooking                                                   | 7 | 3.5 | B | 4 |
| 58103250 | 8000_Mixed | Tamale, plain, meatless, no sauce, Mexican style                                                               | 7 | 4   | B | 4 |
| 58127350 | 8000_Mixed | Croissant sandwich with bacon, egg, and cheese                                                                 | 7 | 2   | D | 4 |
| 58156210 | 8000_Mixed | Rice with vienna sausage, Puerto Rican style                                                                   | 7 | 1.5 | D | 4 |
| 58164510 | 8000_Mixed | Rice, white, with cheese and/or cream based sauce, fat not added in cooking                                    | 7 | 3   | C | 4 |
| 58148118 | 8000_Mixed | Macaroni or pasta salad, made with any type of fat free dressing                                               | 7 | 3.5 | A | 4 |
| 32202090 | 8000_Mixed | Egg and bacon on biscuit                                                                                       | 7 | 1.5 | D | 4 |
| 58104900 | 8000_Mixed | Taquito or flauta with egg                                                                                     | 7 | 3.5 | D | 4 |
| 58126120 | 8000_Mixed | Turnover, meat-filled, with gravy                                                                              | 7 | 3.5 | D | 4 |
| 27213600 | 8000_Mixed | Beef and rice with cheese sauce                                                                                | 7 | 3.5 | B | 4 |
| 58157320 | 8000_Mixed | Congee, with vegetables                                                                                        | 7 | 4   | B | 4 |
| 32202110 | 8000_Mixed | Egg and ham on biscuit                                                                                         | 7 | 1.5 | D | 4 |
| 58134660 | 8000_Mixed | Tortellini, cheese-filled, with cream sauce                                                                    | 6 | 3.5 | C | 4 |
| 32202070 | 8000_Mixed | Egg, cheese, and bacon on biscuit                                                                              | 6 | 1.5 | D | 4 |
| 27360050 | 8000_Mixed | Meat pie, NFS                                                                                                  | 6 | 3   | C | 4 |
| 58127290 | 8000_Mixed | Croissant sandwich with bacon and egg                                                                          | 6 | 1.5 | D | 4 |
| 27347100 | 8000_Mixed | Chicken or turkey pot pie                                                                                      | 6 | 3   | C | 4 |
| 27564370 | 8000_Mixed | Frankfurter or hot dog sandwich, fat free, plain, on white bread                                               | 6 | 3   | C | 4 |
| 58126400 | 8000_Mixed | Turnover, filled with egg, meat and cheese                                                                     | 6 | 3.5 | D | 4 |
| 32202010 | 8000_Mixed | Egg, cheese, and ham on English muffin                                                                         | 6 | 3   | D | 4 |
| 32202080 | 8000_Mixed | Egg, cheese, and bacon on English muffin                                                                       | 6 | 3   | D | 4 |
| 27564124 | 8000_Mixed | Frankfurter or hot dog sandwich, beef and pork, plain, on multigrain bun                                       | 6 | 2   | D | 4 |
| 27220150 | 8000_Mixed | Sausage and rice with mushroom sauce                                                                           | 6 | 3   | C | 4 |
| 27420040 | 8000_Mixed | Frankfurters or hot dogs and sauerkraut                                                                        | 6 | 1.5 | D | 4 |
| 27510130 | 8000_Mixed | Beef barbecue submarine sandwich, on bun                                                                       | 6 | 3.5 | B | 4 |
| 27212100 | 8000_Mixed | Beef and noodles with tomato-based sauce                                                                       | 6 | 3.5 | B | 4 |
| 32202030 | 8000_Mixed | Egg, cheese, and sausage on English muffin                                                                     | 6 | 2   | D | 4 |
| 27564304 | 8000_Mixed | Frankfurter or hot dog sandwich, reduced fat or light, plain, on multigrain bun                                | 6 | 3   | C | 4 |
| 58134623 | 8000_Mixed | Tortellini, cheese-filled, meatless, with tomato sauce, canned                                                 | 6 | 3.5 | B | 4 |
| 58146382 | 8000_Mixed | Pasta with cream sauce, home recipe                                                                            | 6 | 3   | C | 4 |
| 27560670 | 8000_Mixed | Sausage and cheese on English muffin                                                                           | 6 | 1.5 | E | 4 |
| 27520510 | 8000_Mixed | Pork barbecue sandwich or Sloppy Joe, on bun                                                                   | 6 | 3   | D | 4 |
| 27560650 | 8000_Mixed | Sausage on biscuit                                                                                             | 5 | 1.5 | E | 4 |
| 27214600 | 8000_Mixed | Creamed dried beef on toast                                                                                    | 5 | 2   | D | 4 |
| 73210110 | 8000_Mixed | Pumpkin fritters, Puerto Rican style                                                                           | 5 | 3   | D | 4 |
| 58116210 | 8000_Mixed | Meat pie, Puerto Rican style                                                                                   | 5 | 0.5 | E | 4 |
| 58127220 | 8000_Mixed | Croissant sandwich, filled with chicken, broccoli, and cheese sauce                                            | 5 | 1.5 | D | 4 |
| 58147330 | 8000_Mixed | Macaroni or noodles, creamed, with cheese                                                                      | 5 | 3.5 | B | 4 |
| 27564250 | 8000_Mixed | Frankfurter or hot dog sandwich, chicken and/or turkey, plain, on white bread                                  | 5 | 2   | D | 4 |
| 27564004 | 8000_Mixed | Frankfurter or hot dog sandwich, NFS, plain, on multigrain bun                                                 | 5 | 1.5 | D | 4 |
| 27564064 | 8000_Mixed | Frankfurter or hot dog sandwich, beef, plain, on multigrain bun                                                | 5 | 1.5 | D | 4 |
| 27540145 | 8000_Mixed | Chicken fillet, breaded, fried, sandwich on biscuit                                                            | 5 | 1.5 | D | 4 |
| 58150320 | 8000_Mixed | Rice, fried, with chicken                                                                                      | 5 | 3.5 | B | 4 |
| 27220170 | 8000_Mixed | Sausage and rice with cheese sauce                                                                             | 4 | 3   | C | 4 |
| 58122220 | 8000_Mixed | Gnocchi, potato                                                                                                | 4 | 3.5 | C | 4 |
| 32202055 | 8000_Mixed | Egg, cheese, and sausage griddle cake sandwich                                                                 | 4 | 1.5 | D | 4 |
| 27564180 | 8000_Mixed | Frankfurter or hot dog sandwich, meat and poultry, plain, on white bun                                         | 4 | 2   | D | 4 |
| 27564360 | 8000_Mixed | Frankfurter or hot dog sandwich, fat free, plain, on white bun                                                 | 4 | 3.5 | C | 4 |
| 27564130 | 8000_Mixed | Frankfurter or hot dog sandwich, beef and pork, plain, on white bread                                          | 4 | 1.5 | D | 4 |
| 27564190 | 8000_Mixed | Frankfurter or hot dog sandwich, meat and poultry, plain, on white bread                                       | 4 | 1.5 | D | 4 |
| 58310310 | 8000_Mixed | Pancakes and sausage, frozen meal                                                                              | 4 | 2   | D | 4 |

Supplementary Table 8. Original (uncorrected) scores for all food items.

|          |            |                                                                              |   |     |   |   |
|----------|------------|------------------------------------------------------------------------------|---|-----|---|---|
| 27564240 | 8000_Mixed | Frankfurter or hot dog sandwich, chicken and/or turkey, plain, on white bun  | 4 | 2   | D | 4 |
| 58124230 | 8000_Mixed | Pastry, meat / poultry-filled                                                | 4 | 2   | D | 4 |
| 58163330 | 8000_Mixed | Flavored rice mixture with cheese                                            | 3 | 3   | C | 4 |
| 58127270 | 8000_Mixed | Croissant sandwich with sausage and egg                                      | 3 | 1.5 | E | 4 |
| 27560350 | 8000_Mixed | Pig in a blanket, frankfurter or hot dog wrapped in dough                    | 3 | 1.5 | E | 4 |
| 58150330 | 8000_Mixed | Rice, fried, with pork                                                       | 3 | 3.5 | B | 4 |
| 27563010 | 8000_Mixed | Meat spread or potted meat sandwich                                          | 3 | 2   | D | 4 |
| 32202045 | 8000_Mixed | Egg, cheese, and steak on bagel                                              | 3 | 2   | D | 4 |
| 58116310 | 8000_Mixed | Cheese turnover, Puerto Rican style                                          | 3 | 1   | E | 4 |
| 27510910 | 8000_Mixed | Corned beef sandwich                                                         | 3 | 3   | D | 4 |
| 27564010 | 8000_Mixed | Frankfurter or hot dog sandwich, NFS, plain, on white bread                  | 3 | 1.5 | D | 4 |
| 27564070 | 8000_Mixed | Frankfurter or hot dog sandwich, beef, plain, on white bread                 | 3 | 1.5 | D | 4 |
| 27564310 | 8000_Mixed | Frankfurter or hot dog sandwich, reduced fat or light, plain, on white bread | 3 | 3   | C | 4 |
| 27564120 | 8000_Mixed | Frankfurter or hot dog sandwich, beef and pork, plain, on white bun          | 3 | 2   | D | 4 |
| 27564300 | 8000_Mixed | Frankfurter or hot dog sandwich, reduced fat or light, plain, on white bun   | 2 | 3   | C | 4 |
| 58131510 | 8000_Mixed | Ravioli, cheese-filled, no sauce                                             | 2 | 3.5 | D | 4 |
| 32202075 | 8000_Mixed | Egg, cheese, and bacon griddle cake sandwich                                 | 2 | 1.5 | D | 4 |
| 58165070 | 8000_Mixed | Rice, white, with vegetables, soy-based sauce, fat not added in cooking      | 2 | 4   | C | 4 |
| 28321130 | 8000_Mixed | Bacon soup, cream of, prepared with water                                    | 1 | 3   | C | 4 |
| 27564000 | 8000_Mixed | Frankfurter or hot dog sandwich, NFS, plain, on white bun                    | 1 | 1.5 | D | 4 |
| 27564060 | 8000_Mixed | Frankfurter or hot dog sandwich, beef, plain, on white bun                   | 1 | 1.5 | D | 4 |
| 27560660 | 8000_Mixed | Sausage griddle cake sandwich                                                | 1 | 1.5 | D | 4 |
| 32202120 | 8000_Mixed | Egg, cheese and sausage on bagel                                             | 1 | 2   | D | 4 |
| 27510110 | 8000_Mixed | Beef barbecue sandwich or Sloppy Joe, on bun                                 | 1 | 2   | D | 4 |
| 58150340 | 8000_Mixed | Rice, fried, with beef                                                       | 1 | 3.5 | A | 4 |
| 27120250 | 8000_Mixed | Frankfurters or hot dogs with tomato-based sauce                             | 1 | 1.5 | E | 4 |
| 27135040 | 8000_Mixed | Veal with butter sauce                                                       | 1 | 3   | D | 4 |
| 27511010 | 8000_Mixed | Pastrami sandwich                                                            | 1 | 3   | D | 4 |
| 27520250 | 8000_Mixed | Ham on biscuit                                                               | 1 | 1   | E | 4 |
| 27560300 | 8000_Mixed | Corn dog, frankfurter or hot dog with cornbread coating                      | 1 | 2   | D | 4 |
| 28345110 | 8000_Mixed | Chicken or turkey soup, cream of, NS as to prepared with milk or water       | 1 | 3   | C | 4 |
| 28345130 | 8000_Mixed | Chicken or turkey soup, cream of, prepared with water                        | 1 | 3   | C | 4 |
| 55610200 | 8000_Mixed | Dumpling, fried, Puerto Rican style                                          | 1 | 2   | D | 4 |
| 55701000 | 8000_Mixed | Cake made with glutinous rice                                                | 1 | 2   | D | 4 |
| 58103210 | 8000_Mixed | Tamale, meatless, with sauce, Puerto Rican or Caribbean style                | 1 | 1   | E | 4 |
| 58111200 | 8000_Mixed | Puffs, fried, crab meat and cream cheese filled                              | 1 | 1.5 | D | 4 |
| 58122250 | 8000_Mixed | Kishke, stuffed derma                                                        | 1 | 1   | D | 4 |
| 58123110 | 8000_Mixed | Sweet bread dough, filled with meat, steamed                                 | 1 | 3.5 | C | 4 |
| 58124220 | 8000_Mixed | Pastry, egg and cheese filled                                                | 1 | 2   | D | 4 |
| 58127200 | 8000_Mixed | Croissant sandwich, filled with broccoli and cheese                          | 1 | 1.5 | D | 4 |
| 58127210 | 8000_Mixed | Croissant sandwich, filled with ham and cheese                               | 1 | 1   | E | 4 |
| 58150110 | 8000_Mixed | Rice, fried, meatless                                                        | 1 | 3   | C | 4 |
| 58150310 | 8000_Mixed | Rice, fried, NFS                                                             | 1 | 3   | C | 4 |
| 58151100 | 8000_Mixed | Sushi, NFS                                                                   | 1 | 3   | C | 4 |
| 58151180 | 8000_Mixed | Sushi roll, California                                                       | 1 | 3   | C | 4 |
| 58151400 | 8000_Mixed | Sushi, topped with crab                                                      | 1 | 3   | C | 4 |
| 58155610 | 8000_Mixed | Rice meal fritter, Puerto Rican style                                        | 1 | 2   | D | 4 |
| 58164540 | 8000_Mixed | Rice, white, with gravy, fat not added in cooking                            | 1 | 3   | C | 4 |
| 58164570 | 8000_Mixed | Rice, white, with soy-based sauce, fat not added in cooking                  | 1 | 3   | C | 4 |
| 58201000 | 8000_Mixed | Jelly sandwich, regular jelly, NFS                                           | 1 | 3   | C | 4 |
| 58201005 | 8000_Mixed | Jelly sandwich, regular jelly, on white bread                                | 1 | 3   | C | 4 |
| 58201035 | 8000_Mixed | Jelly sandwich, reduced sugar jelly, on white bread                          | 1 | 3   | B | 4 |
| 58400100 | 8000_Mixed | Noodle soup, NFS                                                             | 1 | 3   | C | 4 |
| 58407030 | 8000_Mixed | Soup, mostly noodles                                                         | 1 | 3   | C | 4 |
| 58407035 | 8000_Mixed | Soup, mostly noodles, reduced sodium                                         | 1 | 3.5 | B | 4 |
| 58407050 | 8000_Mixed | Instant soup, noodle with egg, shrimp or chicken                             | 1 | 3   | C | 4 |
| 58408010 | 8000_Mixed | Wonton soup                                                                  | 1 | 3   | C | 4 |

Supplementary Table 8. Original (uncorrected) scores for all food items.

| foodcode | level1nd            | Description                                                                     | Food Compass Score | Health Star Rating | Nutri-Score | NOVA Category |
|----------|---------------------|---------------------------------------------------------------------------------|--------------------|--------------------|-------------|---------------|
| 75121000 | 8600_SauceCondiment | Pepper, hot chili, raw                                                          | 100                | 4.5                | A           | 1             |
| 75226700 | 8600_SauceCondiment | Pimiento                                                                        | 100                | 4.5                | A           | 3             |
| 75512510 | 8600_SauceCondiment | Recaito                                                                         | 100                | 5                  | A           | 1             |
| 41420200 | 8600_SauceCondiment | Natto                                                                           | 93                 | 5                  | A           | 3             |
| 75511010 | 8600_SauceCondiment | Hot pepper sauce                                                                | 90                 | 3.5                | C           | 3             |
| 74420110 | 8600_SauceCondiment | Puerto Rican seasoning without ham and tomato sauce                             | 87                 | 4.5                | B           | 4             |
| 28522050 | 8600_SauceCondiment | Mole verde sauce                                                                | 86                 | 4.5                | A           | 4             |
| 74404050 | 8600_SauceCondiment | Spaghetti sauce, reduced sodium                                                 | 86                 | 4.5                | A           | 4             |
| 27150155 | 8600_SauceCondiment | Spaghetti sauce with seafood and added vegetables                               | 84                 | 4.5                | B           | 4             |
| 74402260 | 8600_SauceCondiment | Enchilada sauce, green                                                          | 84                 | 4.5                | A           | 3             |
| 75412030 | 8600_SauceCondiment | Eggplant dip                                                                    | 83                 | 4.5                | A           | 4             |
| 27150151 | 8600_SauceCondiment | Spaghetti sauce with seafood                                                    | 81                 | 4.5                | A           | 4             |
| 61204200 | 8600_SauceCondiment | Lemon juice, 100%, canned or bottled                                            | 80                 | 4.5                | A           | 1             |
| 75111500 | 8600_SauceCondiment | Garlic, raw                                                                     | 80                 | 5                  | A           | 1             |
| 74402110 | 8600_SauceCondiment | Salsa, pico de gallo                                                            | 80                 | 4                  | A           | 3             |
| 75226100 | 8600_SauceCondiment | Peppers, hot, cooked, NS as to form, fat not added in cooking                   | 80                 | 4.5                | A           | 3             |
| 75226101 | 8600_SauceCondiment | Peppers, hot, cooked, from fresh, fat not added in cooking                      | 80                 | 4.5                | A           | 3             |
| 75226102 | 8600_SauceCondiment | Peppers, hot, cooked, from frozen, fat not added in cooking                     | 80                 | 4.5                | A           | 3             |
| 74402200 | 8600_SauceCondiment | Salsa, red, homemade                                                            | 79                 | 4                  | B           | 4             |
| 75226103 | 8600_SauceCondiment | Peppers, hot, cooked, from canned, fat not added in cooking                     | 78                 | 3.5                | C           | 3             |
| 61204000 | 8600_SauceCondiment | Lemon juice, 100%, NS as to form                                                | 78                 | 4.5                | A           | 1             |
| 61204010 | 8600_SauceCondiment | Lemon juice, 100%, freshly squeezed                                             | 78                 | 4.5                | A           | 1             |
| 61207000 | 8600_SauceCondiment | Lime juice, 100%, NS as to form                                                 | 76                 | 4.5                | A           | 1             |
| 61207010 | 8600_SauceCondiment | Lime juice, 100%, freshly squeezed                                              | 76                 | 4.5                | A           | 1             |
| 74404020 | 8600_SauceCondiment | Spaghetti sauce with added vegetables                                           | 76                 | 4                  | B           | 4             |
| 41205075 | 8600_SauceCondiment | Hummus, flavored                                                                | 73                 | 4.5                | A           | 4             |
| 75506010 | 8600_SauceCondiment | Mustard                                                                         | 73                 | 3                  | C           | 3             |
| 41205070 | 8600_SauceCondiment | Hummus, plain                                                                   | 73                 | 4.5                | A           | 4             |
| 63409015 | 8600_SauceCondiment | Guacamole with tomatoes                                                         | 73                 | 4.5                | A           | 4             |
| 63409010 | 8600_SauceCondiment | Guacamole, NFS                                                                  | 72                 | 4.5                | B           | 4             |
| 61207200 | 8600_SauceCondiment | Lime juice, 100%, canned or bottled                                             | 72                 | 4.5                | A           | 1             |
| 74404060 | 8600_SauceCondiment | Spaghetti sauce, fat free                                                       | 72                 | 4                  | C           | 3             |
| 74404010 | 8600_SauceCondiment | Spaghetti sauce                                                                 | 68                 | 4                  | C           | 4             |
| 75236500 | 8600_SauceCondiment | Yeast extract spread                                                            | 67                 | 0.5                | C           | 4             |
| 42204100 | 8600_SauceCondiment | Brown nut gravy, meatless                                                       | 66                 | 4.5                | B           | 4             |
| 74402100 | 8600_SauceCondiment | Salsa, NFS                                                                      | 66                 | 4                  | C           | 4             |
| 74402150 | 8600_SauceCondiment | Salsa, red, commercially-prepared                                               | 66                 | 4                  | C           | 4             |
| 27141035 | 8600_SauceCondiment | Spaghetti sauce with poultry and added vegetables                               | 65                 | 4.5                | A           | 4             |
| 41205050 | 8600_SauceCondiment | Bean dip, made with refried beans                                               | 64                 | 5                  | A           | 4             |
| 75217400 | 8600_SauceCondiment | Garlic, cooked                                                                  | 62                 | 4.5                | A           | 1             |
| 11440060 | 8600_SauceCondiment | Tzatziki dip                                                                    | 62                 | 3.5                | B           | 4             |
| 11440050 | 8600_SauceCondiment | Spinach dip, yogurt based                                                       | 61                 | 3                  | C           | 4             |
| 27150200 | 8600_SauceCondiment | Oyster sauce                                                                    | 61                 | 3.5                | B           | 4             |
| 41420110 | 8600_SauceCondiment | Miso                                                                            | 60                 | 2                  | C           | 3             |
| 27141030 | 8600_SauceCondiment | Spaghetti sauce with poultry                                                    | 60                 | 4.5                | A           | 4             |
| 41420300 | 8600_SauceCondiment | Soy sauce                                                                       | 59                 | 0.5                | C           | 3             |
| 11440040 | 8600_SauceCondiment | Ranch dip, yogurt based                                                         | 58                 | 3.5                | D           | 4             |
| 28522000 | 8600_SauceCondiment | Mole poblano sauce                                                              | 58                 | 4                  | C           | 4             |
| 11440020 | 8600_SauceCondiment | Dill dip, yogurt based                                                          | 58                 | 3.5                | D           | 4             |
| 11440070 | 8600_SauceCondiment | Vegetable dip, yogurt based                                                     | 58                 | 3.5                | D           | 4             |
| 41205100 | 8600_SauceCondiment | Black bean sauce                                                                | 58                 | 1.5                | C           | 4             |
| 41420350 | 8600_SauceCondiment | Soy sauce, reduced sodium                                                       | 57                 | 0.5                | C           | 3             |
| 74402250 | 8600_SauceCondiment | Enchilada sauce, red                                                            | 57                 | 4                  | C           | 3             |
| 75226093 | 8600_SauceCondiment | Peppers, hot, cooked, from canned, NS as to fat added in cooking                | 57                 | 3.5                | D           | 4             |
| 75226113 | 8600_SauceCondiment | Peppers, hot, cooked, from canned, fat added in cooking, NS as to type of fat   | 57                 | 3.5                | D           | 4             |
| 75226090 | 8600_SauceCondiment | Peppers, hot, cooked, NS as to form, NS as to fat added in cooking              | 56                 | 4                  | B           | 4             |
| 75226091 | 8600_SauceCondiment | Peppers, hot, cooked, from fresh, NS as to fat added in cooking                 | 56                 | 4                  | B           | 4             |
| 75226092 | 8600_SauceCondiment | Peppers, hot, cooked, from frozen, NS as to fat added in cooking                | 56                 | 4                  | B           | 4             |
| 75226110 | 8600_SauceCondiment | Peppers, hot, cooked, NS as to form, fat added in cooking, NS as to type of fat | 56                 | 4                  | B           | 4             |
| 75226111 | 8600_SauceCondiment | Peppers, hot, cooked, from fresh, fat added in cooking, NS as to type of fat    | 56                 | 4                  | B           | 4             |
| 75226112 | 8600_SauceCondiment | Peppers, hot, cooked, from frozen, fat added in cooking, NS as to type of fat   | 56                 | 4                  | B           | 4             |
| 11440010 | 8600_SauceCondiment | Chipotle dip, yogurt based                                                      | 56                 | 3.5                | D           | 4             |
| 11440030 | 8600_SauceCondiment | Onion dip, yogurt based                                                         | 55                 | 3                  | C           | 4             |
| 75503090 | 8600_SauceCondiment | Horseradish                                                                     | 53                 | 4                  | B           | 4             |
| 81302070 | 8600_SauceCondiment | Pesto sauce                                                                     | 51                 | 2                  | E           | 4             |
| 74401110 | 8600_SauceCondiment | Tomato catsup, reduced sodium                                                   | 50                 | 4                  | C           | 1             |
| 83107000 | 8600_SauceCondiment | Mayonnaise, regular                                                             | 49                 | 0.5                | E           | 4             |
| 83100200 | 8600_SauceCondiment | Salad dressing, NFS, for sandwiches                                             | 49                 | 1                  | E           | 4             |
| 74402350 | 8600_SauceCondiment | Salsa verde or salsa, green                                                     | 48                 | 4                  | C           | 4             |
| 74410110 | 8600_SauceCondiment | Puerto Rican seasoning with ham                                                 | 48                 | 3.5                | D           | 4             |
| 27162060 | 8600_SauceCondiment | Spaghetti sauce with meat and added vegetables                                  | 46                 | 4.5                | B           | 4             |
| 27162040 | 8600_SauceCondiment | Spaghetti sauce with meat                                                       | 46                 | 4                  | B           | 4             |
| 28510010 | 8600_SauceCondiment | Gravy or sauce, poultry-based from Puerto Rican-style chicken fricassee         | 46                 | 3.5                | C           | 4             |
| 83204030 | 8600_SauceCondiment | Mayonnaise, reduced fat, with olive oil                                         | 45                 | 1.5                | D           | 4             |
| 81302060 | 8600_SauceCondiment | Horseradish sauce                                                               | 43                 | 1.5                | E           | 4             |
| 41205055 | 8600_SauceCondiment | Layer dip                                                                       | 42                 | 4                  | C           | 4             |
| 14620115 | 8600_SauceCondiment | Spinach and artichoke dip                                                       | 42                 | 3.5                | D           | 4             |
| 74404090 | 8600_SauceCondiment | Vodka sauce with tomatoes and cream                                             | 42                 | 4                  | C           | 4             |
| 12350240 | 8600_SauceCondiment | Spinach dip, regular                                                            | 41                 | 1.5                | D           | 4             |
| 42204050 | 8600_SauceCondiment | Peanut sauce                                                                    | 40                 | 3.5                | D           | 4             |
| 81302050 | 8600_SauceCondiment | Tartar sauce                                                                    | 39                 | 3                  | D           | 4             |
| 12350010 | 8600_SauceCondiment | Dip, NFS                                                                        | 38                 | 1                  | E           | 4             |
| 12350230 | 8600_SauceCondiment | Ranch dip, regular                                                              | 38                 | 1                  | E           | 4             |
| 12350210 | 8600_SauceCondiment | Dill dip, regular                                                               | 38                 | 1                  | E           | 4             |
| 12350250 | 8600_SauceCondiment | Vegetable dip, regular                                                          | 38                 | 1                  | E           | 4             |

Supplementary Table 8. Original (uncorrected) scores for all food items.

|          |                     |                                                                    |    |     |   |   |
|----------|---------------------|--------------------------------------------------------------------|----|-----|---|---|
| 12350200 | 8600_SauceCondiment | Chipotle dip, regular                                              | 38 | 1.5 | E | 4 |
| 12350220 | 8600_SauceCondiment | Onion dip, regular                                                 | 38 | 1.5 | D | 4 |
| 14620110 | 8600_SauceCondiment | Artichoke dip                                                      | 37 | 3.5 | D | 4 |
| 64401000 | 8600_SauceCondiment | Vinegar                                                            | 37 | 3.5 | B | 2 |
| 14620130 | 8600_SauceCondiment | Seafood dip                                                        | 37 | 1.5 | E | 4 |
| 14630100 | 8600_SauceCondiment | Cheese fondue                                                      | 35 | 1.5 | D | 3 |
| 83204000 | 8600_SauceCondiment | Mayonnaise, light                                                  | 35 | 2   | D | 4 |
| 27150210 | 8600_SauceCondiment | Fish sauce                                                         | 34 | 0.5 | C | 4 |
| 74405010 | 8600_SauceCondiment | Tomato relish                                                      | 33 | 3.5 | C | 3 |
| 14620150 | 8600_SauceCondiment | Cheese dip with chili pepper                                       | 33 | 3.5 | D | 4 |
| 63409020 | 8600_SauceCondiment | Chutney                                                            | 33 | 3.5 | C | 3 |
| 74402010 | 8600_SauceCondiment | Tomato chili sauce                                                 | 32 | 3.5 | C | 4 |
| 14630300 | 8600_SauceCondiment | Welsh rarebit                                                      | 32 | 3   | C | 4 |
| 27150190 | 8600_SauceCondiment | Lobster sauce                                                      | 31 | 2   | D | 4 |
| 28500030 | 8600_SauceCondiment | Gravy, poultry, low sodium                                         | 31 | 4   | A | 4 |
| 28500060 | 8600_SauceCondiment | Gravy, beef or meat, low sodium                                    | 31 | 4   | A | 4 |
| 28500050 | 8600_SauceCondiment | Gravy, giblet                                                      | 31 | 3.5 | B | 4 |
| 12350245 | 8600_SauceCondiment | Spinach dip, light                                                 | 31 | 3.5 | D | 4 |
| 13411000 | 8600_SauceCondiment | White sauce, milk sauce                                            | 30 | 3   | C | 4 |
| 75506100 | 8600_SauceCondiment | Honey mustard dip                                                  | 30 | 2   | D | 4 |
| 74415110 | 8600_SauceCondiment | Puerto Rican seasoning with ham and tomato sauce                   | 29 | 3.5 | C | 4 |
| 14620200 | 8600_SauceCondiment | Cheese dip                                                         | 29 | 3.5 | D | 4 |
| 14650100 | 8600_SauceCondiment | Cheese sauce                                                       | 29 | 3.5 | D | 4 |
| 83110000 | 8600_SauceCondiment | Mayonnaise-type salad dressing                                     | 28 | 2   | D | 4 |
| 75534550 | 8600_SauceCondiment | Wasabi paste                                                       | 26 | 1   | D | 4 |
| 12350215 | 8600_SauceCondiment | Dill dip, light                                                    | 26 | 2   | D | 4 |
| 12350255 | 8600_SauceCondiment | Vegetable dip, light                                               | 26 | 2   | D | 4 |
| 28520100 | 8600_SauceCondiment | Oyster-flavored sauce                                              | 25 | 0.5 | C | 4 |
| 12350235 | 8600_SauceCondiment | Ranch dip, light                                                   | 25 | 2   | D | 4 |
| 83108000 | 8600_SauceCondiment | Mayonnaise, imitation                                              | 24 | 3.5 | D | 4 |
| 14650190 | 8600_SauceCondiment | Alfredo sauce with seafood                                         | 23 | 2   | D | 3 |
| 14650150 | 8600_SauceCondiment | Cheese sauce made with lowfat cheese                               | 23 | 3.5 | D | 4 |
| 14650195 | 8600_SauceCondiment | Alfredo sauce with seafood and added vegetables                    | 22 | 3.5 | C | 4 |
| 12350225 | 8600_SauceCondiment | Onion dip, light                                                   | 22 | 3.5 | D | 4 |
| 41420100 | 8600_SauceCondiment | Miso sauce                                                         | 22 | 2   | D | 4 |
| 28500150 | 8600_SauceCondiment | Gravy, redevye                                                     | 21 | 3.5 | B | 4 |
| 74406100 | 8600_SauceCondiment | Steak sauce, tomato-base                                           | 19 | 2   | D | 4 |
| 83204050 | 8600_SauceCondiment | Mayonnaise-type salad dressing, light                              | 18 | 2   | D | 4 |
| 12350205 | 8600_SauceCondiment | Chipotle dip, light                                                | 16 | 2   | D | 4 |
| 13412000 | 8600_SauceCondiment | Milk gravy, quick gravy                                            | 14 | 3   | C | 4 |
| 81312000 | 8600_SauceCondiment | Tartar sauce, reduced fat/calorie                                  | 14 | 3.5 | C | 4 |
| 74406500 | 8600_SauceCondiment | Cocktail sauce                                                     | 14 | 3   | D | 4 |
| 14650180 | 8600_SauceCondiment | Alfredo sauce with poultry                                         | 13 | 2   | D | 3 |
| 41420450 | 8600_SauceCondiment | Worcestershire sauce                                               | 13 | 2   | D | 4 |
| 81302040 | 8600_SauceCondiment | Sandwich spread                                                    | 13 | 1.5 | E | 4 |
| 14650185 | 8600_SauceCondiment | Alfredo sauce with poultry and added vegetables                    | 10 | 3   | D | 4 |
| 41420250 | 8600_SauceCondiment | Hoisin sauce                                                       | 10 | 1   | D | 4 |
| 28500010 | 8600_SauceCondiment | Gravy, meat or poultry, with wine                                  | 10 | 3.5 | B | 4 |
| 14650170 | 8600_SauceCondiment | Alfredo sauce with meat                                            | 9  | 2   | D | 3 |
| 28500020 | 8600_SauceCondiment | Gravy, meat, with fruit                                            | 9  | 4   | B | 4 |
| 28500040 | 8600_SauceCondiment | Gravy, beef or meat                                                | 9  | 3   | C | 4 |
| 74401010 | 8600_SauceCondiment | Tomato catsup                                                      | 9  | 3.5 | D | 4 |
| 81301000 | 8600_SauceCondiment | Garlic sauce                                                       | 9  | 3.5 | C | 4 |
| 83300700 | 8600_SauceCondiment | Mayonnaise, fat free                                               | 7  | 3.5 | C | 4 |
| 14650175 | 8600_SauceCondiment | Alfredo sauce with meat and added vegetables                       | 5  | 3   | D | 4 |
| 41420410 | 8600_SauceCondiment | Teriyaki sauce, reduced sodium                                     | 5  | 1   | D | 4 |
| 28510020 | 8600_SauceCondiment | Gravy, meat-based, from Puerto-Rican style stuffed pot roast       | 4  | 2   | D | 4 |
| 41420400 | 8600_SauceCondiment | Teriyaki sauce                                                     | 4  | 0.5 | D | 4 |
| 14650165 | 8600_SauceCondiment | Alfredo sauce with added vegetables                                | 3  | 3   | D | 4 |
| 28500080 | 8600_SauceCondiment | Gravy, poultry, home recipe                                        | 1  | 3.5 | C | 4 |
| 28501110 | 8600_SauceCondiment | Gravy, poultry, fat free                                           | 1  | 3   | C | 4 |
| 14650160 | 8600_SauceCondiment | Alfredo sauce                                                      | 1  | 2   | D | 4 |
| 28500000 | 8600_SauceCondiment | Gravy, poultry                                                     | 1  | 3   | C | 4 |
| 28500070 | 8600_SauceCondiment | Gravy, beef or meat, home recipe                                   | 1  | 3.5 | C | 4 |
| 28500100 | 8600_SauceCondiment | Gravy, mushroom                                                    | 1  | 3   | C | 4 |
| 28501010 | 8600_SauceCondiment | Gravy, beef or meat, fat free                                      | 1  | 3   | C | 4 |
| 28510030 | 8600_SauceCondiment | Gravy, meat-based, from Puerto-Rican style beef stew               | 1  | 3.5 | C | 4 |
| 28520000 | 8600_SauceCondiment | Gravy or sauce, made with soy sauce, stock or bouillon, cornstarch | 1  | 3.5 | C | 4 |
| 55502000 | 8600_SauceCondiment | Flour and water gravy                                              | 1  | 3.5 | B | 4 |
| 74406010 | 8600_SauceCondiment | Barbecue sauce                                                     | 1  | 1.5 | D | 4 |
| 81301020 | 8600_SauceCondiment | Lemon-butter sauce                                                 | 1  | 1   | D | 4 |
| 81302010 | 8600_SauceCondiment | Hollandaise sauce                                                  | 1  | 0.5 | E | 4 |
| 91361010 | 8600_SauceCondiment | Sweet and sour sauce                                               | 1  | 3.5 | C | 4 |
| 91361050 | 8600_SauceCondiment | Duck sauce                                                         | 1  | 2   | D | 4 |
| 91361070 | 8600_SauceCondiment | Plum sauce, Asian style                                            | 1  | 2   | D | 4 |

Supplementary Table 8. Original (uncorrected) scores for all food items.

| foodcode | level1nd         | Description                                                                                 | Food Compass Score | Health Star Rating | Nutri-Score | NOVA Category |
|----------|------------------|---------------------------------------------------------------------------------------------|--------------------|--------------------|-------------|---------------|
| 11460200 | 9000_SavorySweet | Yogurt, frozen, chocolate, nonfat milk                                                      | 81                 | 3.5                | A           | 4             |
| 11460400 | 9000_SavorySweet | Yogurt, frozen, chocolate, nonfat milk, with low-calorie sweetener                          | 81                 | 3.5                | A           | 4             |
| 11460300 | 9000_SavorySweet | Yogurt, frozen, flavors other than chocolate, nonfat milk                                   | 80                 | 3.5                | A           | 4             |
| 11460410 | 9000_SavorySweet | Yogurt, frozen, flavors other than chocolate, nonfat milk, with low-calorie sweetener       | 80                 | 3.5                | A           | 4             |
| 91511090 | 9000_SavorySweet | Gelatin dessert, dietetic, with fruits and vegetables, sweetened with low calorie sweetener | 78                 | 4.5                | A           | 4             |
| 91701010 | 9000_SavorySweet | Almonds, chocolate covered                                                                  | 78                 | 4                  | D           | 4             |
| 91728500 | 9000_SavorySweet | Sugared pecans, sugar and egg white coating                                                 | 72                 | 4                  | D           | 4             |
| 51808050 | 9000_SavorySweet | Breadsticks, hard, gluten free                                                              | 72                 | 4                  | C           | 4             |
| 54340100 | 9000_SavorySweet | Crackers, gluten free, plain                                                                | 72                 | 4                  | C           | 4             |
| 54340110 | 9000_SavorySweet | Crackers, gluten free, flavored                                                             | 72                 | 4                  | C           | 4             |
| 91703500 | 9000_SavorySweet | Nuts, carob-coated                                                                          | 71                 | 3.5                | D           | 4             |
| 54403010 | 9000_SavorySweet | Popcorn, air-popped, unbuttered                                                             | 70                 | 5                  | A           | 4             |
| 91742010 | 9000_SavorySweet | Sesame Crunch, Sahadi                                                                       | 70                 | 4                  | D           | 4             |
| 73410210 | 9000_SavorySweet | Sweet potato chips                                                                          | 69                 | 4.5                | C           | 4             |
| 54318500 | 9000_SavorySweet | Rice cake                                                                                   | 68                 | 4                  | A           | 4             |
| 54305010 | 9000_SavorySweet | Crackers, crispbread                                                                        | 65                 | 4.5                | A           | 4             |
| 54403045 | 9000_SavorySweet | Popcorn, popped in oil, unbuttered                                                          | 64                 | 4                  | C           | 4             |
| 54403083 | 9000_SavorySweet | Popcorn, ready-to-eat packaged, low sodium                                                  | 64                 | 4                  | C           | 4             |
| 54403084 | 9000_SavorySweet | Popcorn, ready-to-eat packaged, unsalted                                                    | 64                 | 4                  | C           | 4             |
| 41310900 | 9000_SavorySweet | Bean chips                                                                                  | 64                 | 5                  | C           | 4             |
| 71202000 | 9000_SavorySweet | Potato chips, unsalted                                                                      | 62                 | 4                  | C           | 4             |
| 54403054 | 9000_SavorySweet | Popcorn, microwave, low sodium                                                              | 62                 | 3                  | C           | 4             |
| 54403055 | 9000_SavorySweet | Popcorn, microwave, unsalted                                                                | 62                 | 3                  | C           | 4             |
| 91304080 | 9000_SavorySweet | Topping, fruit, unsweetened                                                                 | 62                 | 4                  | B           | 3             |
| 11461270 | 9000_SavorySweet | Yogurt, frozen, cone, flavors other than chocolate, lowfat milk                             | 61                 | 3.5                | B           | 4             |
| 91708010 | 9000_SavorySweet | Date candy                                                                                  | 61                 | 3.5                | D           | 4             |
| 54403082 | 9000_SavorySweet | Popcorn, ready-to-eat packaged, plain, light                                                | 61                 | 4                  | C           | 4             |
| 71220000 | 9000_SavorySweet | Vegetable chips                                                                             | 61                 | 4.5                | C           | 4             |
| 54403061 | 9000_SavorySweet | Popcorn, microwave, kettle corn, light                                                      | 60                 | 4.5                | C           | 4             |
| 54403086 | 9000_SavorySweet | Popcorn, ready-to-eat packaged, butter flavored, light                                      | 60                 | 3                  | C           | 4             |
| 54403088 | 9000_SavorySweet | Popcorn, ready-to-eat packaged, cheese flavored, light                                      | 60                 | 3                  | C           | 4             |
| 54403081 | 9000_SavorySweet | Popcorn, ready-to-eat packaged, plain                                                       | 60                 | 3                  | C           | 4             |
| 71202100 | 9000_SavorySweet | Potato chips, reduced fat, unsalted                                                         | 59                 | 4.5                | B           | 4             |
| 54420210 | 9000_SavorySweet | Multigrain chips (Sun Chips)                                                                | 59                 | 3                  | C           | 4             |
| 54440020 | 9000_SavorySweet | Cracker chips                                                                               | 59                 | 3                  | C           | 4             |
| 91511100 | 9000_SavorySweet | Gelatin salad, dietetic, with vegetables, sweetened with low calorie sweetener              | 59                 | 4                  | B           | 4             |
| 91732100 | 9000_SavorySweet | Planters Peanut Bar                                                                         | 59                 | 3.5                | E           | 4             |
| 54403059 | 9000_SavorySweet | Popcorn, microwave, kettle corn                                                             | 59                 | 3                  | C           | 4             |
| 71202500 | 9000_SavorySweet | Potato chips, lightly salted                                                                | 59                 | 4                  | C           | 4             |
| 71202510 | 9000_SavorySweet | Potato chips, restructured, lightly salted                                                  | 59                 | 4                  | C           | 4             |
| 54403053 | 9000_SavorySweet | Popcorn, microwave, plain, light                                                            | 59                 | 3.5                | C           | 4             |
| 54403057 | 9000_SavorySweet | Popcorn, microwave, butter flavored, light                                                  | 59                 | 3.5                | C           | 4             |
| 54401011 | 9000_SavorySweet | Corn nuts                                                                                   | 59                 | 3                  | C           | 4             |
| 11460160 | 9000_SavorySweet | Yogurt, frozen, chocolate, lowfat milk                                                      | 58                 | 3.5                | B           | 4             |
| 91511020 | 9000_SavorySweet | Gelatin dessert, dietetic, with fruit, sweetened with low calorie sweetener                 | 58                 | 4.5                | B           | 1             |
| 91727010 | 9000_SavorySweet | Nuts, chocolate covered, not almonds or peanuts                                             | 58                 | 1.5                | E           | 4             |
| 56205200 | 9000_SavorySweet | Rice, frozen dessert, nondairy, flavors other than chocolate                                | 58                 | 4                  | B           | 4             |
| 56205240 | 9000_SavorySweet | Rice dessert bar, frozen, chocolate, nondairy, chocolate covered                            | 57                 | 3.5                | B           | 4             |
| 91716010 | 9000_SavorySweet | Halvah, plain                                                                               | 57                 | 3.5                | D           | 4             |
| 54403080 | 9000_SavorySweet | Popcorn, ready-to-eat packaged, NFS                                                         | 57                 | 3.5                | D           | 4             |
| 54403085 | 9000_SavorySweet | Popcorn, ready-to-eat packaged, butter flavored                                             | 57                 | 3.5                | D           | 4             |
| 71200110 | 9000_SavorySweet | Potato chips, barbecue flavored                                                             | 56                 | 3.5                | D           | 4             |
| 71200120 | 9000_SavorySweet | Potato chips, sour cream and onion flavored                                                 | 56                 | 3.5                | D           | 4             |
| 71200130 | 9000_SavorySweet | Potato chips, cheese flavored                                                               | 56                 | 3.5                | D           | 4             |
| 71200140 | 9000_SavorySweet | Potato chips, other flavored                                                                | 56                 | 3.5                | D           | 4             |
| 71200210 | 9000_SavorySweet | Potato chips, ruffled, barbecue flavored                                                    | 56                 | 3.5                | D           | 4             |
| 71200220 | 9000_SavorySweet | Potato chips, ruffled, sour cream and onion flavored                                        | 56                 | 3.5                | D           | 4             |
| 71200230 | 9000_SavorySweet | Potato chips, ruffled, cheese flavored                                                      | 56                 | 3.5                | D           | 4             |
| 71200240 | 9000_SavorySweet | Potato chips, ruffled, other flavored                                                       | 56                 | 3.5                | D           | 4             |
| 54319020 | 9000_SavorySweet | Popcorn cake                                                                                | 56                 | 4                  | A           | 4             |
| 91511070 | 9000_SavorySweet | Gelatin dessert, dietetic, with fruit and sour cream, sweetened with low calorie sweetener  | 56                 | 4.5                | A           | 3             |
| 11460190 | 9000_SavorySweet | Yogurt, frozen, NS as to flavor, nonfat milk                                                | 56                 | 3                  | B           | 4             |
| 54403087 | 9000_SavorySweet | Popcorn, ready-to-eat packaged, cheese flavored                                             | 56                 | 3.5                | D           | 4             |
| 54403092 | 9000_SavorySweet | Popcorn, ready-to-eat packaged, other flavored                                              | 56                 | 3.5                | D           | 4             |
| 71200010 | 9000_SavorySweet | Potato chips, NFS                                                                           | 55                 | 3.5                | C           | 4             |
| 71200100 | 9000_SavorySweet | Potato chips, plain                                                                         | 55                 | 3.5                | C           | 4             |
| 71200200 | 9000_SavorySweet | Potato chips, ruffled, plain                                                                | 55                 | 3.5                | C           | 4             |
| 54401026 | 9000_SavorySweet | Corn chips, flavored                                                                        | 55                 | 3.5                | C           | 4             |
| 54401031 | 9000_SavorySweet | Corn chips, plain (Fritos)                                                                  | 55                 | 3.5                | C           | 4             |
| 91304060 | 9000_SavorySweet | Topping, nuts and syrup                                                                     | 54                 | 3                  | D           | 4             |
| 91701020 | 9000_SavorySweet | Almonds, sugar-coated                                                                       | 54                 | 3                  | D           | 4             |
| 54403046 | 9000_SavorySweet | Popcorn, popped in oil, with added butter or margarine                                      | 53                 | 3.5                | D           | 4             |
| 71201050 | 9000_SavorySweet | Potato chips, reduced fat                                                                   | 53                 | 4                  | C           | 4             |
| 54401035 | 9000_SavorySweet | Corn chips, flavored (Fritos)                                                               | 53                 | 2                  | D           | 4             |
| 91406000 | 9000_SavorySweet | Jam, preserve, marmalade, sugar free, all flavors                                           | 53                 | 4.5                | A           | 3             |
| 54401021 | 9000_SavorySweet | Corn chips, plain                                                                           | 52                 | 2                  | D           | 4             |
| 54403040 | 9000_SavorySweet | Popcorn, air-popped, with added butter or margarine                                         | 52                 | 4                  | C           | 4             |
| 91728000 | 9000_SavorySweet | Nut roll, fudge or nougat, caramel and nuts                                                 | 51                 | 3                  | D           | 4             |
| 54305020 | 9000_SavorySweet | Crackers, flatbread                                                                         | 51                 | 4                  | C           | 4             |
| 56205230 | 9000_SavorySweet | Rice dessert bar, frozen, flavors other than chocolate, nondairy, carob covered             | 51                 | 3.5                | B           | 4             |
| 91731100 | 9000_SavorySweet | Peanuts, sugar-coated                                                                       | 51                 | 1.5                | D           | 4             |
| 91732000 | 9000_SavorySweet | Peanut bar                                                                                  | 51                 | 1.5                | D           | 4             |
| 54318000 | 9000_SavorySweet | Chips, rice                                                                                 | 50                 | 4                  | A           | 4             |
| 91701030 | 9000_SavorySweet | Almonds, yogurt-covered                                                                     | 50                 | 1                  | E           | 4             |
| 54401090 | 9000_SavorySweet | Corn chips, reduced sodium                                                                  | 50                 | 3.5                | C           | 4             |

Supplementary Table 8. Original (uncorrected) scores for all food items.

|          |                  |                                                                                                  |    |     |   |   |
|----------|------------------|--------------------------------------------------------------------------------------------------|----|-----|---|---|
| 91405000 | 9000_SavorySweet | Jelly, sugar free, all flavors                                                                   | 49 | 4.5 | A | 3 |
| 91407150 | 9000_SavorySweet | Bean paste, sweetened                                                                            | 49 | 4   | B | 3 |
| 71205020 | 9000_SavorySweet | Potato sticks, plain                                                                             | 49 | 3   | D | 4 |
| 54200100 | 9000_SavorySweet | Crackers, butter, reduced sodium                                                                 | 48 | 4   | B | 4 |
| 54204020 | 9000_SavorySweet | Crackers, wheat, reduced sodium                                                                  | 48 | 4   | B | 4 |
| 54204030 | 9000_SavorySweet | Crackers, woven wheat, reduced sodium                                                            | 48 | 4   | B | 4 |
| 51306000 | 9000_SavorySweet | Breadsticks, hard, whole wheat                                                                   | 48 | 3   | C | 4 |
| 54328120 | 9000_SavorySweet | Crackers, whole grain, sandwich, peanut butter filled                                            | 48 | 3.5 | D | 4 |
| 11461280 | 9000_SavorySweet | Yogurt, frozen, cone, chocolate, lowfat milk                                                     | 47 | 3.5 | B | 4 |
| 54403091 | 9000_SavorySweet | Popcorn, ready-to-eat packaged, kettle corn, light                                               | 47 | 3   | C | 4 |
| 91731150 | 9000_SavorySweet | Peanuts, yogurt covered                                                                          | 47 | 0.5 | E | 4 |
| 71205030 | 9000_SavorySweet | Potato sticks, flavored                                                                          | 46 | 3.5 | E | 4 |
| 71205040 | 9000_SavorySweet | Potato sticks, fry shaped                                                                        | 46 | 3.5 | E | 4 |
| 71980200 | 9000_SavorySweet | Taro chips                                                                                       | 45 | 3.5 | C | 4 |
| 91304070 | 9000_SavorySweet | Topping, peanut butter, thick, fudge type                                                        | 45 | 2   | C | 4 |
| 54325060 | 9000_SavorySweet | Crackers, saltine, multigrain                                                                    | 44 | 3.5 | C | 4 |
| 71200400 | 9000_SavorySweet | Potato chips, baked, plain                                                                       | 44 | 4   | C | 4 |
| 71203010 | 9000_SavorySweet | Potato chips, popped, plain                                                                      | 44 | 4   | C | 4 |
| 71203030 | 9000_SavorySweet | Potato chips, popped, NFS                                                                        | 44 | 4   | C | 4 |
| 91501090 | 9000_SavorySweet | Gelatin dessert with fruit, vegetable, and nuts                                                  | 44 | 4   | B | 4 |
| 91703060 | 9000_SavorySweet | Caramel with nuts, chocolate covered                                                             | 44 | 1.5 | D | 4 |
| 54337060 | 9000_SavorySweet | Crackers, woven wheat, reduced fat                                                               | 44 | 3   | C | 4 |
| 71905410 | 9000_SavorySweet | Plantain chips                                                                                   | 44 | 3   | D | 4 |
| 11460100 | 9000_SavorySweet | Yogurt, frozen, chocolate, NS as to type of milk                                                 | 43 | 3   | C | 4 |
| 11460430 | 9000_SavorySweet | Yogurt, frozen, chocolate, whole milk                                                            | 43 | 3   | C | 4 |
| 91716110 | 9000_SavorySweet | Halvah, chocolate covered                                                                        | 43 | 1   | E | 4 |
| 71200410 | 9000_SavorySweet | Potato chips, baked, flavored                                                                    | 43 | 3.5 | D | 4 |
| 71203020 | 9000_SavorySweet | Potato chips, popped, flavored                                                                   | 43 | 3.5 | D | 4 |
| 91700500 | 9000_SavorySweet | M&M's Almond Chocolate Candies                                                                   | 43 | 1   | E | 4 |
| 71201060 | 9000_SavorySweet | Potato chips, fat free                                                                           | 43 | 4   | C | 4 |
| 71200300 | 9000_SavorySweet | Potato chips, restructured, plain                                                                | 42 | 3   | D | 4 |
| 13160160 | 9000_SavorySweet | Fat free ice cream, no sugar added, flavors other than chocolate                                 | 42 | 3.5 | B | 4 |
| 44201000 | 9000_SavorySweet | Carob chips                                                                                      | 42 | 1.5 | E | 4 |
| 91301082 | 9000_SavorySweet | Chocolate syrup, thin type, sugar free                                                           | 42 | 3.5 | A | 4 |
| 71200310 | 9000_SavorySweet | Potato chips, restructured, flavored                                                             | 41 | 3.5 | D | 4 |
| 13140710 | 9000_SavorySweet | Light ice cream, creamsicle or dreamsicle, no sugar added                                        | 41 | 3.5 | A | 4 |
| 91511110 | 9000_SavorySweet | Gelatin dessert, dietetic, with fruit and whipped topping, sweetened with low calorie sweetener  | 41 | 4.5 | B | 3 |
| 91731000 | 9000_SavorySweet | Peanuts, chocolate covered                                                                       | 40 | 1   | E | 4 |
| 91511080 | 9000_SavorySweet | Gelatin dessert, dietetic, with fruit and cream cheese, sweetened with low calorie sweetener     | 39 | 4.5 | B | 3 |
| 54403089 | 9000_SavorySweet | Popcorn, ready-to-eat-packaged, kettle corn                                                      | 39 | 2   | D | 4 |
| 53116500 | 9000_SavorySweet | Cake or cupcake, pumpkin, without icing or filling                                               | 39 | 2   | D | 4 |
| 13250200 | 9000_SavorySweet | Mousse, chocolate, lowfat, reduced calorie, prepared from dry mix, water added                   | 39 | 3.5 | B | 4 |
| 71201200 | 9000_SavorySweet | Potato chips, restructured, reduced fat, lightly salted                                          | 39 | 3   | D | 4 |
| 53104100 | 9000_SavorySweet | Cake or cupcake, carrot, without icing or filling                                                | 38 | 2   | D | 4 |
| 91406600 | 9000_SavorySweet | Jam, preserve, marmalade, reduced sugar, all flavors                                             | 38 | 3   | C | 3 |
| 13120750 | 9000_SavorySweet | Ice cream cone with nuts, chocolate ice cream                                                    | 37 | 3.5 | C | 4 |
| 53102600 | 9000_SavorySweet | Cake or cupcake, banana, without icing or filling                                                | 37 | 2   | D | 4 |
| 91733200 | 9000_SavorySweet | Peanut Bar, chocolate covered candy                                                              | 37 | 1   | E | 4 |
| 54402080 | 9000_SavorySweet | Tortilla chips, reduced sodium                                                                   | 37 | 3.5 | A | 4 |
| 13160400 | 9000_SavorySweet | Fat free ice cream, flavors other than chocolate                                                 | 37 | 3.5 | B | 4 |
| 13160420 | 9000_SavorySweet | Fat free ice cream, NS as to flavor                                                              | 37 | 3.5 | B | 4 |
| 91520100 | 9000_SavorySweet | Yokan                                                                                            | 36 | 4   | C | 3 |
| 91405500 | 9000_SavorySweet | Jelly, reduced sugar, all flavors                                                                | 36 | 3   | C | 3 |
| 63403150 | 9000_SavorySweet | Lime souffle                                                                                     | 35 | 2   | D | 4 |
| 91713060 | 9000_SavorySweet | Fudge, peanut butter, with nuts                                                                  | 35 | 1   | E | 4 |
| 91731010 | 9000_SavorySweet | M&M's Peanut Chocolate Candies                                                                   | 35 | 0.5 | E | 4 |
| 13120780 | 9000_SavorySweet | Ice cream cone, chocolate covered, with nuts, chocolate ice cream                                | 35 | 2   | D | 4 |
| 13161000 | 9000_SavorySweet | Milk dessert bar, frozen, made from lowfat milk                                                  | 35 | 4   | A | 4 |
| 53452100 | 9000_SavorySweet | Pastry, fruit-filled                                                                             | 35 | 3.5 | C | 4 |
| 91705070 | 9000_SavorySweet | Chocolate, milk, with peanuts                                                                    | 35 | 1   | E | 4 |
| 91303000 | 9000_SavorySweet | Molasses                                                                                         | 35 | 1   | D | 2 |
| 91406500 | 9000_SavorySweet | Jam, preserve, marmalade, sweetened with fruit juice concentrates, all flavors                   | 35 | 3   | C | 3 |
| 53102100 | 9000_SavorySweet | Cake or cupcake, applesauce, without icing or filling                                            | 34 | 2   | D | 4 |
| 53117100 | 9000_SavorySweet | Cake or cupcake, spice, without icing or filling                                                 | 34 | 2   | D | 4 |
| 13120700 | 9000_SavorySweet | Ice cream cone with nuts, flavors other than chocolate                                           | 34 | 3.5 | D | 4 |
| 54337010 | 9000_SavorySweet | Crackers, woven wheat                                                                            | 33 | 3   | C | 4 |
| 54337020 | 9000_SavorySweet | Crackers, woven wheat, plain (Triscuit)                                                          | 33 | 3   | C | 4 |
| 54337030 | 9000_SavorySweet | Crackers, woven wheat, flavored (Triscuit)                                                       | 33 | 3   | C | 4 |
| 54338010 | 9000_SavorySweet | Crackers, wheat, plain (Wheat Thins)                                                             | 33 | 3   | C | 4 |
| 54338020 | 9000_SavorySweet | Crackers, wheat, flavored (Wheat Thins)                                                          | 33 | 3   | C | 4 |
| 54338000 | 9000_SavorySweet | Crackers, wheat                                                                                  | 33 | 3   | C | 4 |
| 54403120 | 9000_SavorySweet | Popcorn, caramel coated, with nuts                                                               | 33 | 1.5 | D | 4 |
| 13161600 | 9000_SavorySweet | Milk dessert bar, frozen, made from lowfat milk and low calorie sweetener                        | 33 | 3.5 | A | 4 |
| 91734000 | 9000_SavorySweet | Peanut butter, chocolate covered                                                                 | 33 | 0.5 | E | 4 |
| 91770030 | 9000_SavorySweet | Dietetic or low calorie candy, chocolate covered                                                 | 33 | 0.5 | D | 4 |
| 13220220 | 9000_SavorySweet | Pudding, chocolate, prepared from dry mix, low calorie, containing artificial sweetener, milk ad | 32 | 3.5 | C | 4 |
| 54304150 | 9000_SavorySweet | Crackers, cheese, whole grain                                                                    | 32 | 3.5 | D | 4 |
| 63420110 | 9000_SavorySweet | Fruit juice bar, frozen, flavor other than orange                                                | 32 | 4   | C | 4 |
| 63430100 | 9000_SavorySweet | Sorbet, fruit, noncitrus flavor                                                                  | 32 | 4   | C | 4 |
| 91734500 | 9000_SavorySweet | Peanut butter morsels                                                                            | 32 | 1   | E | 4 |
| 54102100 | 9000_SavorySweet | Graham crackers, reduced fat                                                                     | 32 | 3.5 | C | 4 |
| 91501020 | 9000_SavorySweet | Gelatin dessert with fruit                                                                       | 31 | 4   | B | 3 |
| 53440500 | 9000_SavorySweet | Strudel, cherry                                                                                  | 31 | 3.5 | C | 4 |
| 91718000 | 9000_SavorySweet | Honey-combed hard candy with peanut butter                                                       | 31 | 2   | E | 4 |
| 54403001 | 9000_SavorySweet | Popcorn, NFS                                                                                     | 31 | 1.5 | E | 4 |
| 54403051 | 9000_SavorySweet | Popcorn, microwave, NFS                                                                          | 31 | 1.5 | E | 4 |

Supplementary Table 8. Original (uncorrected) scores for all food items.

|          |                  |                                                                                                    |    |     |   |   |
|----------|------------------|----------------------------------------------------------------------------------------------------|----|-----|---|---|
| 54403052 | 9000_SavorySweet | Popcorn, microwave, plain                                                                          | 31 | 1.5 | E | 4 |
| 54403056 | 9000_SavorySweet | Popcorn, microwave, butter flavored                                                                | 31 | 1.5 | E | 4 |
| 91708020 | 9000_SavorySweet | Soft fruit confections                                                                             | 31 | 3   | D | 4 |
| 91713040 | 9000_SavorySweet | Fudge, chocolate, with nuts                                                                        | 31 | 1   | D | 4 |
| 13110310 | 9000_SavorySweet | Ice cream, no sugar added, NS as to flavor                                                         | 31 | 3   | C | 4 |
| 13110320 | 9000_SavorySweet | Ice cream, no sugar added, flavors other than chocolate                                            | 31 | 3   | C | 4 |
| 91407100 | 9000_SavorySweet | Guava paste                                                                                        | 30 | 1.5 | D | 3 |
| 91734100 | 9000_SavorySweet | Reese's Peanut Butter Cup                                                                          | 30 | 0.5 | E | 4 |
| 91705310 | 9000_SavorySweet | Chocolate, sweet or dark, with almonds                                                             | 30 | 3.5 | E | 4 |
| 53390100 | 9000_SavorySweet | Pie, tofu with fruit                                                                               | 30 | 3.5 | C | 4 |
| 41480000 | 9000_SavorySweet | Tofu, frozen dessert, flavors other than chocolate                                                 | 30 | 3.5 | D | 4 |
| 41410015 | 9000_SavorySweet | Soy chips                                                                                          | 30 | 3.5 | C | 4 |
| 54403058 | 9000_SavorySweet | Popcorn, microwave, cheese flavored                                                                | 30 | 1.5 | E | 4 |
| 54403062 | 9000_SavorySweet | Popcorn, microwave, other flavored                                                                 | 30 | 1.5 | E | 4 |
| 53116550 | 9000_SavorySweet | Cake or cupcake, raisin-nut                                                                        | 30 | 1.5 | D | 4 |
| 91705040 | 9000_SavorySweet | Chocolate, milk, with nuts, not almond or peanuts                                                  | 30 | 0.5 | E | 4 |
| 63203700 | 9000_SavorySweet | Blueberry pie filling                                                                              | 30 | 3   | C | 4 |
| 54301100 | 9000_SavorySweet | Crackers, butter, reduced fat                                                                      | 29 | 2   | D | 4 |
| 54338100 | 9000_SavorySweet | Crackers, wheat, reduced fat                                                                       | 29 | 2   | D | 4 |
| 53231400 | 9000_SavorySweet | Cookie, multigrain, high fiber                                                                     | 29 | 1   | E | 4 |
| 53223100 | 9000_SavorySweet | Cookie, granola                                                                                    | 29 | 1   | E | 4 |
| 13110330 | 9000_SavorySweet | Ice cream, no sugar added, chocolate                                                               | 29 | 3.5 | B | 4 |
| 91501110 | 9000_SavorySweet | Gelatin dessert with fruit and whipped topping                                                     | 29 | 4   | C | 4 |
| 91403000 | 9000_SavorySweet | Fruit butter, all flavors                                                                          | 29 | 3.5 | C | 3 |
| 58118110 | 9000_SavorySweet | Cornstarch coconut dessert, Puerto Rican style                                                     | 29 | 1.5 | D | 2 |
| 54408310 | 9000_SavorySweet | Pretzels, hard, peanut butter filled                                                               | 29 | 1.5 | D | 4 |
| 13140580 | 9000_SavorySweet | Light ice cream, no sugar added, cone, chocolate                                                   | 28 | 3   | B | 4 |
| 54402200 | 9000_SavorySweet | Snack mix                                                                                          | 28 | 2   | D | 4 |
| 91501120 | 9000_SavorySweet | Gelatin dessert with fruit and vegetables                                                          | 28 | 4   | B | 3 |
| 91734450 | 9000_SavorySweet | Reese's Crispy Crunchy Bar                                                                         | 28 | 1   | E | 4 |
| 91718050 | 9000_SavorySweet | Honey-combed hard candy with peanut butter, chocolate covered                                      | 27 | 1   | E | 4 |
| 54103000 | 9000_SavorySweet | Crackers, breakfast biscuit                                                                        | 27 | 3.5 | D | 4 |
| 91726150 | 9000_SavorySweet | MARS Almond Bar                                                                                    | 27 | 1   | E | 4 |
| 54102015 | 9000_SavorySweet | Graham crackers (Teddy Grahams)                                                                    | 27 | 2   | D | 4 |
| 91733000 | 9000_SavorySweet | Peanut brittle                                                                                     | 27 | 2   | E | 4 |
| 13220210 | 9000_SavorySweet | Pudding, flavors other than chocolate, prepared from dry mix, low calorie, containing artificial : | 27 | 3.5 | C | 4 |
| 54102010 | 9000_SavorySweet | Graham crackers                                                                                    | 27 | 2   | D | 4 |
| 91705500 | 9000_SavorySweet | Mexican chocolate, tablet                                                                          | 27 | 1.5 | D | 4 |
| 53115310 | 9000_SavorySweet | Cake or cupcake, nut, without icing or filling                                                     | 27 | 1.5 | D | 4 |
| 58124210 | 9000_SavorySweet | Pastry, cheese-filled                                                                              | 27 | 2   | D | 4 |
| 13161630 | 9000_SavorySweet | Light ice cream, bar or stick, with low-calorie sweetener, chocolate coated                        | 27 | 3   | C | 4 |
| 53387000 | 9000_SavorySweet | Pie, Toll house chocolate chip                                                                     | 27 | 1   | E | 4 |
| 54403006 | 9000_SavorySweet | Popcorn, movie theater, unbuttered                                                                 | 26 | 0.5 | E | 4 |
| 13140110 | 9000_SavorySweet | Light ice cream, bar or stick, chocolate covered, with nuts                                        | 26 | 1.5 | D | 4 |
| 71201210 | 9000_SavorySweet | Potato chips, restructured, fat free                                                               | 26 | 3   | D | 4 |
| 91705060 | 9000_SavorySweet | Milk chocolate candy, with almonds                                                                 | 26 | 0.5 | E | 4 |
| 13140575 | 9000_SavorySweet | Light ice cream, no sugar added, cone, flavors other than chocolate                                | 26 | 3.5 | C | 4 |
| 13140570 | 9000_SavorySweet | Light ice cream, no sugar added, cone, NS as to flavor                                             | 26 | 3   | C | 4 |
| 91731060 | 9000_SavorySweet | M&M's Peanut Butter Chocolate Candies                                                              | 26 | 0.5 | E | 4 |
| 11460420 | 9000_SavorySweet | Yogurt, frozen, NS as to flavor, whole milk                                                        | 26 | 3   | C | 4 |
| 41480010 | 9000_SavorySweet | Tofu, frozen dessert, chocolate                                                                    | 26 | 3   | C | 4 |
| 13120130 | 9000_SavorySweet | Ice cream bar or stick, rich ice cream, chocolate covered, with nuts                               | 25 | 1.5 | D | 4 |
| 11460000 | 9000_SavorySweet | Yogurt, frozen, flavors other than chocolate, NS as to type of milk                                | 25 | 3   | C | 4 |
| 11460440 | 9000_SavorySweet | Yogurt, frozen, flavors other than chocolate, whole milk                                           | 25 | 3   | C | 4 |
| 63113030 | 9000_SavorySweet | Cherry pie filling                                                                                 | 25 | 3.5 | C | 3 |
| 13210810 | 9000_SavorySweet | Pumpkin pudding, Puerto Rican style                                                                | 25 | 4   | C | 4 |
| 91301060 | 9000_SavorySweet | Maple syrup                                                                                        | 25 | 1.5 | D | 2 |
| 91705050 | 9000_SavorySweet | Milk chocolate candy, with fruit and nuts                                                          | 25 | 0.5 | E | 4 |
| 53260200 | 9000_SavorySweet | Cookie, oatmeal, sugar free                                                                        | 25 | 2   | D | 4 |
| 91708150 | 9000_SavorySweet | Yogurt covered fruit snacks candy, with added vitamin C                                            | 25 | 1   | D | 4 |
| 54102050 | 9000_SavorySweet | Crackers, oatmeal                                                                                  | 25 | 3.5 | D | 4 |
| 54339000 | 9000_SavorySweet | Crackers, corn                                                                                     | 25 | 3.5 | D | 4 |
| 53415200 | 9000_SavorySweet | Fritter, banana                                                                                    | 25 | 3   | C | 4 |
| 54326000 | 9000_SavorySweet | Crackers, multigrain                                                                               | 24 | 1.5 | D | 4 |
| 54401170 | 9000_SavorySweet | Tortilla chips, low fat, unsalted                                                                  | 24 | 4   | A | 4 |
| 53260500 | 9000_SavorySweet | Cookie, sugar wafer, sugar free                                                                    | 24 | 4   | C | 4 |
| 91703080 | 9000_SavorySweet | Caramel, all flavors, sugar free                                                                   | 24 | 3.5 | D | 4 |
| 13142000 | 9000_SavorySweet | Milk dessert bar or stick, frozen, with coconut                                                    | 24 | 3.5 | C | 4 |
| 53260600 | 9000_SavorySweet | Cookie, peanut butter, sugar free                                                                  | 24 | 2   | D | 4 |
| 91734400 | 9000_SavorySweet | Reese's Fast Break                                                                                 | 24 | 0.5 | E | 4 |
| 91407120 | 9000_SavorySweet | Sweet potato paste                                                                                 | 24 | 1.5 | D | 3 |
| 91304090 | 9000_SavorySweet | Topping, chocolate flavored hazelnut spread                                                        | 24 | 0.5 | E | 4 |
| 91718110 | 9000_SavorySweet | Butterfinger Crisp                                                                                 | 24 | 0.5 | E | 4 |
| 91703030 | 9000_SavorySweet | Caramel, with nuts                                                                                 | 24 | 1   | E | 4 |
| 91705300 | 9000_SavorySweet | Chocolate, sweet or dark                                                                           | 23 | 0.5 | E | 4 |
| 54401085 | 9000_SavorySweet | Tortilla chips, flavored                                                                           | 23 | 3.5 | D | 4 |
| 54401110 | 9000_SavorySweet | Tortilla chips, nacho cheese flavor (Doritos)                                                      | 23 | 3.5 | D | 4 |
| 54401112 | 9000_SavorySweet | Tortilla chips, other flavors (Doritos)                                                            | 23 | 3.5 | D | 4 |
| 91713020 | 9000_SavorySweet | Fudge, chocolate, chocolate-coated, with nuts                                                      | 23 | 0.5 | E | 4 |
| 91713090 | 9000_SavorySweet | Fudge, divinity                                                                                    | 23 | 1   | D | 4 |
| 13130340 | 9000_SavorySweet | Light ice cream, no sugar added, chocolate                                                         | 23 | 3   | C | 4 |
| 13160150 | 9000_SavorySweet | Fat free ice cream, no sugar added, chocolate                                                      | 23 | 3   | C | 4 |
| 91703250 | 9000_SavorySweet | TWIX Chocolate Fudge Cookie Bars                                                                   | 23 | 1   | D | 4 |
| 54401055 | 9000_SavorySweet | Cheese flavored corn snacks                                                                        | 23 | 1.5 | E | 4 |
| 54401081 | 9000_SavorySweet | Cheese flavored corn snacks (Cheetos)                                                              | 23 | 1.5 | E | 4 |
| 53347000 | 9000_SavorySweet | Pie, pumpkin                                                                                       | 23 | 3.5 | C | 4 |

Supplementary Table 8. Original (uncorrected) scores for all food items.

|          |                  |                                                                                                   |    |     |   |   |
|----------|------------------|---------------------------------------------------------------------------------------------------|----|-----|---|---|
| 53347070 | 9000_SavorySweet | Pie, pumpkin, individual size or tart                                                             | 23 | 3.5 | C | 4 |
| 54328000 | 9000_SavorySweet | Crackers, sandwich                                                                                | 23 | 1.5 | D | 4 |
| 54328100 | 9000_SavorySweet | Crackers, sandwich, peanut butter filled                                                          | 23 | 1.5 | D | 4 |
| 91705200 | 9000_SavorySweet | Chocolate, semi-sweet morsel                                                                      | 23 | 0.5 | E | 4 |
| 13230140 | 9000_SavorySweet | Pudding, ready-to-eat, low calorie, containing artificial sweetener, chocolate                    | 23 | 3   | C | 4 |
| 13210250 | 9000_SavorySweet | Pudding, chocolate, low calorie, containing artificial sweetener, NS as to from dry mix or ready- | 23 | 3   | C | 4 |
| 91713050 | 9000_SavorySweet | Fudge, peanut butter                                                                              | 23 | 0.5 | E | 4 |
| 53415300 | 9000_SavorySweet | Crisp, blueberry                                                                                  | 23 | 3   | C | 4 |
| 13140900 | 9000_SavorySweet | Light ice cream, fudgesicle                                                                       | 23 | 3   | C | 4 |
| 53415220 | 9000_SavorySweet | Fritter, berry                                                                                    | 22 | 3.5 | C | 4 |
| 13130630 | 9000_SavorySweet | Light ice cream, soft serve cone, chocolate                                                       | 22 | 3   | C | 4 |
| 11460250 | 9000_SavorySweet | Yogurt, frozen, flavors other than chocolate, with sorbet or sorbet-coated                        | 22 | 3   | C | 4 |
| 11459990 | 9000_SavorySweet | Yogurt, frozen, NS as to flavor, NS as to type of milk                                            | 22 | 3   | B | 4 |
| 11460150 | 9000_SavorySweet | Yogurt, frozen, NS as to flavor, lowfat milk                                                      | 22 | 3   | B | 4 |
| 54402700 | 9000_SavorySweet | Pita chips                                                                                        | 22 | 3.5 | D | 4 |
| 53105300 | 9000_SavorySweet | Cake or cupcake, German chocolate, with icing or filling                                          | 22 | 1   | E | 4 |
| 53420310 | 9000_SavorySweet | Wheat flour fritter, without syrup                                                                | 22 | 1.5 | D | 4 |
| 91708160 | 9000_SavorySweet | Yogurt covered fruit snacks candy rolls, with high vitamin C                                      | 22 | 2   | D | 4 |
| 51184100 | 9000_SavorySweet | Breadsticks, hard, reduced sodium                                                                 | 22 | 4   | A | 4 |
| 11460170 | 9000_SavorySweet | Yogurt, frozen, flavors other than chocolate, lowfat milk                                         | 22 | 3   | B | 4 |
| 53110000 | 9000_SavorySweet | Cake, fruit cake, light or dark, holiday type cake                                                | 21 | 3.5 | C | 4 |
| 91713100 | 9000_SavorySweet | Fudge, brown sugar, peneuche                                                                      | 21 | 0.5 | D | 4 |
| 91735000 | 9000_SavorySweet | Pralines                                                                                          | 21 | 0.5 | D | 4 |
| 91304250 | 9000_SavorySweet | Topping, milk chocolate with cereal                                                               | 21 | 0.5 | E | 4 |
| 11461250 | 9000_SavorySweet | Yogurt, frozen, cone, chocolate                                                                   | 21 | 2   | C | 4 |
| 91703050 | 9000_SavorySweet | Caramel with nuts and cereal, chocolate covered                                                   | 21 | 0.5 | E | 4 |
| 54401065 | 9000_SavorySweet | Cheese flavored corn snacks, reduced fat                                                          | 21 | 2   | D | 4 |
| 54401075 | 9000_SavorySweet | Tortilla chips, plain                                                                             | 21 | 3.5 | B | 4 |
| 54420220 | 9000_SavorySweet | Snack mix, plain (Chex Mix)                                                                       | 21 | 3.5 | C | 4 |
| 53260300 | 9000_SavorySweet | Cookie, sandwich, sugar free                                                                      | 21 | 3.5 | C | 4 |
| 91304300 | 9000_SavorySweet | Topping, chocolate, hard coating                                                                  | 21 | 0.5 | E | 4 |
| 54403160 | 9000_SavorySweet | Popcorn, chocolate coated                                                                         | 21 | 1.5 | E | 4 |
| 58157210 | 9000_SavorySweet | Rice pudding made with coconut milk, Puerto Rican style                                           | 21 | 1.5 | D | 4 |
| 54403005 | 9000_SavorySweet | Popcorn, movie theater, with added butter                                                         | 21 | 0.5 | E | 4 |
| 51168000 | 9000_SavorySweet | Bread, Spanish coffee                                                                             | 21 | 3.5 | B | 4 |
| 91402000 | 9000_SavorySweet | Jam, preserve, all flavors                                                                        | 20 | 3.5 | D | 3 |
| 91705410 | 9000_SavorySweet | Chocolate, white, with almonds                                                                    | 20 | 0.5 | E | 4 |
| 63420100 | 9000_SavorySweet | Fruit juice bar, frozen, orange flavor                                                            | 20 | 4   | C | 4 |
| 63430110 | 9000_SavorySweet | Sorbet, fruit, citrus flavor                                                                      | 20 | 4   | C | 4 |
| 91713080 | 9000_SavorySweet | Fudge, vanilla, with nuts                                                                         | 20 | 0.5 | D | 4 |
| 53451500 | 9000_SavorySweet | Turnover, guava                                                                                   | 20 | 3.5 | C | 4 |
| 55801010 | 9000_SavorySweet | Funnel cake with sugar and fruit                                                                  | 20 | 2   | D | 4 |
| 91734200 | 9000_SavorySweet | Reese's Pieces                                                                                    | 20 | 0.5 | E | 4 |
| 54402610 | 9000_SavorySweet | Potato chips, restructured, multigrain                                                            | 19 | 3.5 | D | 4 |
| 91715100 | 9000_SavorySweet | SNICKERS Bar                                                                                      | 19 | 0.5 | E | 4 |
| 54336100 | 9000_SavorySweet | Crackers, wonton                                                                                  | 19 | 2   | D | 4 |
| 56116000 | 9000_SavorySweet | Noodles, chow mein                                                                                | 19 | 2   | D | 4 |
| 91726000 | 9000_SavorySweet | Nougat, plain                                                                                     | 19 | 2   | C | 4 |
| 53116510 | 9000_SavorySweet | Cake or cupcake, pumpkin, with icing or filling                                                   | 19 | 1   | E | 4 |
| 91104100 | 9000_SavorySweet | Sugar, cinnamon                                                                                   | 19 | 1   | C | 2 |
| 54319005 | 9000_SavorySweet | Crackers, rice and nuts                                                                           | 19 | 3.5 | B | 4 |
| 13110130 | 9000_SavorySweet | Ice cream, rich, chocolate                                                                        | 19 | 1.5 | D | 4 |
| 51161050 | 9000_SavorySweet | Roll, sweet, frosted                                                                              | 19 | 2   | D | 4 |
| 54301010 | 9000_SavorySweet | Crackers, butter, plain                                                                           | 19 | 1.5 | D | 4 |
| 54301020 | 9000_SavorySweet | Crackers, butter, flavored                                                                        | 19 | 1.5 | D | 4 |
| 54301030 | 9000_SavorySweet | Crackers, butter (Ritz)                                                                           | 19 | 1.5 | D | 4 |
| 54001000 | 9000_SavorySweet | Crackers, NFS                                                                                     | 19 | 1.5 | D | 4 |
| 91736000 | 9000_SavorySweet | Pineapple candy, Puerto Rican style                                                               | 19 | 1.5 | D | 4 |
| 55801000 | 9000_SavorySweet | Funnel cake with sugar                                                                            | 19 | 2   | D | 4 |
| 53440300 | 9000_SavorySweet | Strudel, berry                                                                                    | 19 | 3.5 | C | 4 |
| 54401111 | 9000_SavorySweet | Tortilla chips, cool ranch flavor (Doritos)                                                       | 19 | 3   | C | 4 |
| 53302070 | 9000_SavorySweet | Pie, apricot, individual size or tart                                                             | 19 | 3.5 | C | 4 |
| 91703600 | 9000_SavorySweet | Espresso coffee beans, chocolate-covered                                                          | 19 | 0.5 | E | 4 |
| 91739010 | 9000_SavorySweet | Raisins, chocolate covered                                                                        | 19 | 0.5 | E | 4 |
| 53451750 | 9000_SavorySweet | Turnover, pumpkin                                                                                 | 19 | 3   | C | 4 |
| 53300170 | 9000_SavorySweet | Pie, individual size or tart, NFS                                                                 | 19 | 3.5 | C | 4 |
| 53301070 | 9000_SavorySweet | Pie, apple, individual size or tart                                                               | 19 | 3.5 | C | 4 |
| 13210530 | 9000_SavorySweet | Pudding, tapioca, chocolate, made with milk                                                       | 19 | 3   | C | 4 |
| 53452150 | 9000_SavorySweet | Pastry, Chinese, made with rice flour                                                             | 18 | 3   | C | 4 |
| 53104260 | 9000_SavorySweet | Cake or cupcake, carrot, with icing or filling                                                    | 18 | 1   | E | 4 |
| 91718300 | 9000_SavorySweet | Ladoo, round ball, Asian-Indian dessert                                                           | 18 | 3.5 | D | 4 |
| 53308070 | 9000_SavorySweet | Pie, pineapple, individual size or tart                                                           | 18 | 3.5 | C | 4 |
| 91302010 | 9000_SavorySweet | Honey                                                                                             | 18 | 1   | D | 2 |
| 13120400 | 9000_SavorySweet | Ice cream bar or stick with fruit                                                                 | 18 | 3   | C | 4 |
| 13120120 | 9000_SavorySweet | Ice cream bar or stick, rich chocolate ice cream, thick chocolate covering                        | 18 | 1   | D | 4 |
| 53235000 | 9000_SavorySweet | Cookie, peanut butter sandwich                                                                    | 18 | 1.5 | D | 4 |
| 54328110 | 9000_SavorySweet | Crackers, sandwich, reduced fat, peanut butter filled                                             | 18 | 2   | D | 4 |
| 53346000 | 9000_SavorySweet | Pie, peanut butter cream                                                                          | 17 | 2   | D | 4 |
| 13210750 | 9000_SavorySweet | Pudding, pumpkin                                                                                  | 17 | 3   | C | 4 |
| 53102700 | 9000_SavorySweet | Cake or cupcake, banana, with icing or filling                                                    | 17 | 1   | E | 4 |
| 91739600 | 9000_SavorySweet | Raisins, yogurt covered                                                                           | 17 | 1.5 | E | 4 |
| 53100050 | 9000_SavorySweet | Cake batter, raw, chocolate                                                                       | 17 | 2   | D | 4 |
| 53124110 | 9000_SavorySweet | Cake or cupcake, zucchini                                                                         | 17 | 1   | E | 4 |
| 53441110 | 9000_SavorySweet | Baklava                                                                                           | 17 | 1.5 | D | 4 |
| 63420200 | 9000_SavorySweet | Fruit juice bar, frozen, sweetened with low calorie sweetener, flavors other than orange          | 17 | 4.5 | B | 4 |
| 53452450 | 9000_SavorySweet | Cheese pastry puffs                                                                               | 17 | 2   | D | 4 |



Supplementary Table 8. Original (uncorrected) scores for all food items.

|          |                  |                                                                                                  |    |     |   |   |
|----------|------------------|--------------------------------------------------------------------------------------------------|----|-----|---|---|
| 91760200 | 9000_SavorySweet | Toffee, chocolate-coated, with nuts                                                              | 17 | 0.5 | E | 4 |
| 13120140 | 9000_SavorySweet | Ice cream bar or stick, chocolate ice cream, chocolate covered                                   | 17 | 1.5 | D | 4 |
| 53452400 | 9000_SavorySweet | Pastry, puff                                                                                     | 17 | 2   | D | 4 |
| 53105500 | 9000_SavorySweet | Cake, chocolate, with icing, diet                                                                | 16 | 3.5 | D | 4 |
| 58149160 | 9000_SavorySweet | Noodle pudding, with milk                                                                        | 16 | 3.5 | C | 4 |
| 53310000 | 9000_SavorySweet | Pie, raspberry, one crust                                                                        | 16 | 3.5 | C | 4 |
| 53105275 | 9000_SavorySweet | Cake or cupcake, chocolate, devil's food or fudge, without icing or filling                      | 16 | 2   | D | 4 |
| 91705010 | 9000_SavorySweet | Milk chocolate candy, plain                                                                      | 16 | 0.5 | E | 4 |
| 32120200 | 9000_SavorySweet | Zabaglione                                                                                       | 16 | 3.5 | C | 4 |
| 53415120 | 9000_SavorySweet | Fritter, apple                                                                                   | 16 | 2   | D | 4 |
| 91550300 | 9000_SavorySweet | Pineapple custard, Puerto Rican style                                                            | 16 | 3.5 | C | 4 |
| 13120100 | 9000_SavorySweet | Ice cream bar or stick, chocolate covered                                                        | 16 | 1.5 | D | 4 |
| 54404020 | 9000_SavorySweet | Popcorn chips, sweet flavors                                                                     | 16 | 3.5 | B | 4 |
| 13250000 | 9000_SavorySweet | Mousse, chocolate                                                                                | 16 | 2   | D | 4 |
| 53385000 | 9000_SavorySweet | Pie, pecan                                                                                       | 16 | 2   | D | 4 |
| 53385070 | 9000_SavorySweet | Pie, pecan, individual size or tart                                                              | 16 | 2   | D | 4 |
| 53440700 | 9000_SavorySweet | Strudel, peach                                                                                   | 16 | 3.5 | C | 4 |
| 91705020 | 9000_SavorySweet | Milk chocolate candy, with cereal                                                                | 16 | 0.5 | E | 4 |
| 91705420 | 9000_SavorySweet | Chocolate, white, with cereal                                                                    | 16 | 0.5 | E | 4 |
| 13110110 | 9000_SavorySweet | Ice cream, regular, chocolate                                                                    | 16 | 2   | D | 4 |
| 54201010 | 9000_SavorySweet | Crackers, matzo, reduced sodium                                                                  | 16 | 4   | A | 4 |
| 54307000 | 9000_SavorySweet | Crackers, matzo                                                                                  | 16 | 4   | A | 4 |
| 53105270 | 9000_SavorySweet | Cake or cupcake, chocolate, devil's food or fudge, with icing or filling                         | 16 | 1.5 | D | 4 |
| 54328105 | 9000_SavorySweet | Crackers, sandwich, peanut butter filled (Ritz)                                                  | 16 | 1.5 | D | 4 |
| 53234000 | 9000_SavorySweet | Cookie, peanut butter                                                                            | 16 | 1   | E | 4 |
| 53366000 | 9000_SavorySweet | Pie, yogurt, frozen                                                                              | 16 | 2   | D | 4 |
| 91718200 | 9000_SavorySweet | Chocolate-flavored sprinkles                                                                     | 16 | 0.5 | E | 4 |
| 54328210 | 9000_SavorySweet | Crackers, sandwich, cheese filled (Ritz)                                                         | 15 | 1.5 | D | 4 |
| 91301090 | 9000_SavorySweet | Sorghum syrup                                                                                    | 15 | 1   | D | 4 |
| 91703300 | 9000_SavorySweet | TWIX Peanut Butter Cookie Bars                                                                   | 15 | 0.5 | E | 4 |
| 53102200 | 9000_SavorySweet | Cake or cupcake, applesauce, with icing or filling                                               | 15 | 1   | E | 4 |
| 13127010 | 9000_SavorySweet | Dippin' Dots, flash frozen ice cream snacks, chocolate                                           | 15 | 2   | D | 4 |
| 53117200 | 9000_SavorySweet | Cake or cupcake, spice, with icing or filling                                                    | 15 | 1   | E | 4 |
| 53100100 | 9000_SavorySweet | Cake or cupcake, NS as to type                                                                   | 15 | 1.5 | D | 4 |
| 91401000 | 9000_SavorySweet | Jelly, all flavors                                                                               | 15 | 3.5 | D | 3 |
| 54406010 | 9000_SavorySweet | Onion flavored rings                                                                             | 15 | 1.5 | D | 4 |
| 91760500 | 9000_SavorySweet | Truffles                                                                                         | 15 | 0.5 | E | 4 |
| 53344000 | 9000_SavorySweet | Pie, custard                                                                                     | 15 | 3   | C | 4 |
| 91560100 | 9000_SavorySweet | Haupia                                                                                           | 15 | 1.5 | D | 4 |
| 91703150 | 9000_SavorySweet | Toblerone, milk chocolate with honey and almond nougat                                           | 15 | 0.5 | E | 4 |
| 53303000 | 9000_SavorySweet | Pie, blackberry, two crust                                                                       | 15 | 3.5 | C | 4 |
| 13120110 | 9000_SavorySweet | Ice cream bar or stick, chocolate or caramel covered, with nuts                                  | 15 | 1   | E | 4 |
| 13210300 | 9000_SavorySweet | Custard                                                                                          | 15 | 3.5 | B | 4 |
| 91802000 | 9000_SavorySweet | Chewing gum, sugar free                                                                          | 15 | 3.5 | B | 4 |
| 53115450 | 9000_SavorySweet | Cake or cupcake, peanut butter                                                                   | 15 | 1   | E | 4 |
| 53234100 | 9000_SavorySweet | Cookie, peanut butter, with chocolate                                                            | 15 | 1   | E | 4 |
| 53441210 | 9000_SavorySweet | Basbousa                                                                                         | 15 | 2   | D | 4 |
| 13110210 | 9000_SavorySweet | Ice cream, soft serve, chocolate                                                                 | 15 | 2   | D | 4 |
| 91715000 | 9000_SavorySweet | Fudge, caramel and nut, chocolate-coated candy                                                   | 15 | 0.5 | E | 4 |
| 54401095 | 9000_SavorySweet | Tortilla chips, popped                                                                           | 15 | 3.5 | C | 4 |
| 54404000 | 9000_SavorySweet | Popcorn chips, plain                                                                             | 15 | 3.5 | C | 4 |
| 54404010 | 9000_SavorySweet | Popcorn chips, other flavors                                                                     | 15 | 3.5 | C | 4 |
| 13210110 | 9000_SavorySweet | Pudding, bread                                                                                   | 14 | 3   | C | 4 |
| 54328200 | 9000_SavorySweet | Crackers, sandwich, cheese filled                                                                | 14 | 1.5 | E | 4 |
| 53452170 | 9000_SavorySweet | Pastry, cookie type, fried                                                                       | 14 | 2   | D | 4 |
| 54408485 | 9000_SavorySweet | Pretzels, soft, gluten free                                                                      | 14 | 3.5 | C | 4 |
| 53260400 | 9000_SavorySweet | Cookie, sugar or plain, sugar free                                                               | 14 | 2   | D | 4 |
| 53112000 | 9000_SavorySweet | Cake, ice cream and cake roll, chocolate                                                         | 14 | 1.5 | D | 4 |
| 53303510 | 9000_SavorySweet | Pie, berry, not blackberry, blueberry, boysenberry, huckleberry, raspberry, or strawberry; one c | 14 | 3   | C | 4 |
| 53115320 | 9000_SavorySweet | Cake or cupcake, nut, with icing or filling                                                      | 14 | 1   | E | 4 |
| 13127000 | 9000_SavorySweet | Dippin' Dots, flash frozen ice cream snacks, flavors other than chocolate                        | 14 | 2   | D | 4 |
| 13110000 | 9000_SavorySweet | Ice cream, NFS                                                                                   | 14 | 2   | D | 4 |
| 13130100 | 9000_SavorySweet | Light ice cream, NS as to flavor                                                                 | 14 | 3.5 | C | 4 |
| 13130300 | 9000_SavorySweet | Light ice cream, flavors other than chocolate                                                    | 14 | 3.5 | C | 4 |
| 13110100 | 9000_SavorySweet | Ice cream, regular, flavors other than chocolate                                                 | 13 | 2   | D | 4 |
| 13110200 | 9000_SavorySweet | Ice cream, soft serve, flavors other than chocolate                                              | 13 | 2   | D | 4 |
| 13110220 | 9000_SavorySweet | Ice cream, soft serve, NS as to flavor                                                           | 13 | 2   | D | 4 |
| 13120050 | 9000_SavorySweet | Ice cream bar or stick, not chocolate covered or cake covered                                    | 13 | 2   | D | 4 |
| 53220040 | 9000_SavorySweet | Cookie, fig bar, fat free                                                                        | 13 | 2   | D | 4 |
| 53220000 | 9000_SavorySweet | Cookie, fruit-filled bar                                                                         | 13 | 2   | D | 4 |
| 53220010 | 9000_SavorySweet | Cookie, fruit-filled bar, fat free                                                               | 13 | 2   | D | 4 |
| 53220030 | 9000_SavorySweet | Cookie, fig bar                                                                                  | 13 | 2   | D | 4 |
| 13220230 | 9000_SavorySweet | Pudding, ready-to-eat, chocolate, reduced fat                                                    | 13 | 3   | C | 4 |
| 13220235 | 9000_SavorySweet | Pudding, ready-to-eat, chocolate, fat free                                                       | 13 | 3   | C | 4 |
| 53415500 | 9000_SavorySweet | Crisp, peach                                                                                     | 13 | 3   | D | 4 |
| 13220120 | 9000_SavorySweet | Pudding, chocolate, prepared from dry mix, milk added                                            | 13 | 3   | C | 4 |
| 53452120 | 9000_SavorySweet | Pastry, made with bean or lotus seed paste filling, baked                                        | 13 | 3.5 | C | 4 |
| 53415100 | 9000_SavorySweet | Crisp, apple, apple dessert                                                                      | 13 | 4   | C | 4 |
| 53206020 | 9000_SavorySweet | Cookie, chocolate chip, made from home recipe or purchased at a bakery                           | 13 | 0.5 | E | 4 |
| 54403110 | 9000_SavorySweet | Popcorn, caramel coated                                                                          | 13 | 1   | D | 4 |
| 91734300 | 9000_SavorySweet | Reese's Sticks                                                                                   | 13 | 0.5 | E | 4 |
| 13250100 | 9000_SavorySweet | Mousse, not chocolate                                                                            | 13 | 3   | D | 4 |
| 91501070 | 9000_SavorySweet | Gelatin dessert with fruit and sour cream                                                        | 13 | 4   | C | 4 |
| 13122100 | 9000_SavorySweet | Ice cream pie, no crust                                                                          | 13 | 2   | D | 4 |
| 53251100 | 9000_SavorySweet | Cookie, rugelach                                                                                 | 13 | 2   | D | 4 |
| 53233040 | 9000_SavorySweet | Cookie, oatmeal, reduced fat, NS as to raisins                                                   | 13 | 3.5 | D | 4 |

Supplementary Table 8. Original (uncorrected) scores for all food items.

|          |                  |                                                                                        |    |     |   |   |
|----------|------------------|----------------------------------------------------------------------------------------|----|-----|---|---|
| 51184000 | 9000_SavorySweet | Breadsticks, hard, NFS                                                                 | 13 | 3.5 | C | 4 |
| 53420250 | 9000_SavorySweet | Cream puff, no filling or icing                                                        | 13 | 2   | D | 4 |
| 53344300 | 9000_SavorySweet | Dessert pizza                                                                          | 13 | 3.5 | C | 4 |
| 53452420 | 9000_SavorySweet | Pastry, puff, custard or cream filled, iced or not iced                                | 13 | 2   | D | 4 |
| 53347500 | 9000_SavorySweet | Pie, sour cream, raisin                                                                | 13 | 3.5 | D | 4 |
| 13241000 | 9000_SavorySweet | Pudding, with fruit and vanilla wafers                                                 | 13 | 3   | C | 4 |
| 13210610 | 9000_SavorySweet | Pudding, coconut                                                                       | 13 | 3   | C | 4 |
| 13121200 | 9000_SavorySweet | Ice cream sundae, prepackaged type, flavors other than chocolate                       | 13 | 3.5 | C | 4 |
| 53382000 | 9000_SavorySweet | Pie, chocolate-marshmallow                                                             | 13 | 1   | E | 4 |
| 51185000 | 9000_SavorySweet | Croutons                                                                               | 13 | 1.5 | D | 4 |
| 53303070 | 9000_SavorySweet | Pie, blackberry, individual size or tart                                               | 13 | 3   | C | 4 |
| 13120121 | 9000_SavorySweet | Ice cream bar or stick, rich ice cream, thick chocolate covering                       | 13 | 1   | E | 4 |
| 53104300 | 9000_SavorySweet | Cake, carrot, diet                                                                     | 13 | 3   | D | 4 |
| 91706100 | 9000_SavorySweet | Coconut candy, no chocolate covering                                                   | 12 | 0.5 | E | 4 |
| 91361020 | 9000_SavorySweet | Fruit sauce                                                                            | 12 | 3   | D | 4 |
| 13120760 | 9000_SavorySweet | Ice cream cone, chocolate covered or dipped, chocolate ice cream                       | 12 | 2   | D | 4 |
| 91726410 | 9000_SavorySweet | Nougat, chocolate covered                                                              | 12 | 1.5 | D | 4 |
| 13130610 | 9000_SavorySweet | Light ice cream, soft serve, chocolate                                                 | 12 | 3   | C | 4 |
| 53305080 | 9000_SavorySweet | Pie, cherry, fried pie                                                                 | 12 | 3.5 | C | 4 |
| 53226600 | 9000_SavorySweet | Cookie, marshmallow and peanut butter, with oat cereal, no bake                        | 12 | 2   | D | 4 |
| 53234250 | 9000_SavorySweet | Cookie, peanut butter with rice cereal, no bake                                        | 12 | 2   | D | 4 |
| 53226500 | 9000_SavorySweet | Cookie, marshmallow, with rice cereal, no bake                                         | 12 | 2   | D | 4 |
| 91706000 | 9000_SavorySweet | Coconut candy, chocolate covered                                                       | 12 | 0.5 | E | 4 |
| 91550100 | 9000_SavorySweet | Coconut cream cake, Puerto Rican style                                                 | 12 | 1   | E | 4 |
| 53302080 | 9000_SavorySweet | Pie, apricot, fried pie                                                                | 12 | 3.5 | C | 4 |
| 11461000 | 9000_SavorySweet | Yogurt, frozen, chocolate-coated                                                       | 12 | 1   | E | 4 |
| 53410200 | 9000_SavorySweet | Cobbler, apricot                                                                       | 12 | 3.5 | C | 4 |
| 53300180 | 9000_SavorySweet | Pie, fried, NFS                                                                        | 12 | 3.5 | C | 4 |
| 53301080 | 9000_SavorySweet | Pie, apple, fried pie                                                                  | 12 | 3.5 | C | 4 |
| 13120300 | 9000_SavorySweet | Ice cream bar, cake covered                                                            | 12 | 2   | D | 4 |
| 91715200 | 9000_SavorySweet | Baby Ruth                                                                              | 12 | 0.5 | E | 4 |
| 53410300 | 9000_SavorySweet | Cobbler, berry                                                                         | 12 | 3   | C | 4 |
| 53307080 | 9000_SavorySweet | Pie, peach, fried pie                                                                  | 12 | 3.5 | C | 4 |
| 53415600 | 9000_SavorySweet | Crisp, rhubarb                                                                         | 12 | 3.5 | D | 4 |
| 53305750 | 9000_SavorySweet | Pie, lemon, fried pie                                                                  | 12 | 3.5 | C | 4 |
| 53115100 | 9000_SavorySweet | Cake or cupcake, marble, without icing or filling                                      | 12 | 1.5 | D | 4 |
| 53440000 | 9000_SavorySweet | Strudel, apple                                                                         | 12 | 3.5 | C | 4 |
| 91718100 | 9000_SavorySweet | Butterfinger                                                                           | 12 | 0.5 | E | 4 |
| 11461260 | 9000_SavorySweet | Yogurt, frozen, cone, flavors other than chocolate                                     | 12 | 3.5 | D | 4 |
| 53344200 | 9000_SavorySweet | Mixed fruit tart filled with custard or cream cheese                                   | 11 | 3   | C | 4 |
| 91304020 | 9000_SavorySweet | Topping, chocolate, thick, fudge type                                                  | 11 | 1.5 | D | 4 |
| 13120790 | 9000_SavorySweet | Ice cream sundae cone                                                                  | 11 | 3.5 | C | 4 |
| 53312000 | 9000_SavorySweet | Pie, strawberry, one crust                                                             | 11 | 3.5 | C | 4 |
| 54202020 | 9000_SavorySweet | Crackers, saltine, reduced sodium                                                      | 11 | 3.5 | C | 4 |
| 13120710 | 9000_SavorySweet | Ice cream cone, chocolate covered, with nuts, flavors other than chocolate             | 11 | 1   | E | 4 |
| 53237000 | 9000_SavorySweet | Cookie, raisin                                                                         | 11 | 1   | E | 4 |
| 54304005 | 9000_SavorySweet | Crackers, cheese (Cheez-It)                                                            | 11 | 1.5 | E | 4 |
| 54304020 | 9000_SavorySweet | Crackers, cheese (Goldfish)                                                            | 11 | 1.5 | E | 4 |
| 54304000 | 9000_SavorySweet | Crackers, cheese                                                                       | 11 | 1.5 | E | 4 |
| 13210450 | 9000_SavorySweet | Pudding, rice flour, and nuts                                                          | 11 | 3   | C | 4 |
| 13140660 | 9000_SavorySweet | Light ice cream, sundae, soft serve, chocolate or fudge topping, without whipped cream | 11 | 3.5 | C | 4 |
| 13130320 | 9000_SavorySweet | Light ice cream, no sugar added, NS as to flavor                                       | 11 | 3   | C | 4 |
| 13130330 | 9000_SavorySweet | Light ice cream, no sugar added, flavors other than chocolate                          | 11 | 3   | C | 4 |
| 13120720 | 9000_SavorySweet | Ice cream cone, chocolate covered or dipped, flavors other than chocolate              | 11 | 2   | D | 4 |
| 13130310 | 9000_SavorySweet | Light ice cream, chocolate                                                             | 11 | 3.5 | C | 4 |
| 13130590 | 9000_SavorySweet | Light ice cream, soft serve, NS as to flavor                                           | 11 | 3   | C | 4 |
| 13130600 | 9000_SavorySweet | Light ice cream, soft serve, flavors other than chocolate                              | 11 | 3   | C | 4 |
| 13140100 | 9000_SavorySweet | Light ice cream, bar or stick, chocolate coated                                        | 11 | 1   | D | 4 |
| 91746010 | 9000_SavorySweet | Sugar-coated chocolate discs                                                           | 11 | 0.5 | E | 4 |
| 91746100 | 9000_SavorySweet | M&M's Milk Chocolate Candies                                                           | 11 | 0.5 | E | 4 |
| 91746120 | 9000_SavorySweet | Sixlets                                                                                | 11 | 0.5 | E | 4 |
| 91746150 | 9000_SavorySweet | Easter egg, candy coated chocolate                                                     | 11 | 0.5 | E | 4 |
| 13160410 | 9000_SavorySweet | Fat free ice cream, chocolate                                                          | 11 | 3.5 | D | 4 |
| 91511060 | 9000_SavorySweet | Gelatin dessert, dietetic, with sour cream, sweetened with low calorie sweetener       | 11 | 3.5 | B | 4 |
| 13120770 | 9000_SavorySweet | Ice cream cone, no topping, chocolate ice cream                                        | 11 | 2   | D | 4 |
| 91713010 | 9000_SavorySweet | Fudge, chocolate, chocolate-coated                                                     | 10 | 0.5 | E | 4 |
| 53115200 | 9000_SavorySweet | Cake or cupcake, marble, with icing or filling                                         | 10 | 1.5 | E | 4 |
| 91501040 | 9000_SavorySweet | Gelatin dessert with fruit and whipped cream                                           | 10 | 4   | C | 4 |
| 53209010 | 9000_SavorySweet | Cookie, sugar wafer, chocolate-covered                                                 | 10 | 0.5 | E | 4 |
| 53210900 | 9000_SavorySweet | Cookie, graham cracker with chocolate and marshmallow                                  | 10 | 1   | E | 4 |
| 13136000 | 9000_SavorySweet | Ice cream sandwich, made with light, no sugar added ice cream                          | 10 | 4   | A | 4 |
| 91611100 | 9000_SavorySweet | Ice pop, sweetened with low calorie sweetener                                          | 10 | 3.5 | B | 4 |
| 13120740 | 9000_SavorySweet | Ice cream cone, no topping, NS as to flavor                                            | 10 | 2   | D | 4 |
| 13121000 | 9000_SavorySweet | Ice cream sundae, NS as to topping, with whipped cream                                 | 10 | 1.5 | D | 4 |
| 13210270 | 9000_SavorySweet | Custard, Puerto Rican style                                                            | 10 | 3   | C | 4 |
| 51161000 | 9000_SavorySweet | Pan Dulce, with fruit, no frosting                                                     | 10 | 2   | D | 4 |
| 51160100 | 9000_SavorySweet | Roll, sweet, cinnamon bun, no frosting                                                 | 10 | 2   | D | 4 |
| 51165000 | 9000_SavorySweet | Coffee cake, yeast type                                                                | 10 | 2   | D | 4 |
| 91351020 | 9000_SavorySweet | Topping, dietetic                                                                      | 10 | 3.5 | B | 4 |
| 53347600 | 9000_SavorySweet | Pie, squash                                                                            | 10 | 3   | C | 4 |
| 13121300 | 9000_SavorySweet | Ice cream sundae, chocolate or fudge topping, with whipped cream                       | 10 | 2   | D | 4 |
| 51161020 | 9000_SavorySweet | Roll, sweet, with fruit, frosted                                                       | 10 | 1.5 | D | 4 |
| 53310050 | 9000_SavorySweet | Pie, raspberry, two crust                                                              | 10 | 3   | C | 4 |
| 13140600 | 9000_SavorySweet | Light ice cream, sundae, soft serve, chocolate or fudge topping, with whipped cream    | 10 | 2   | D | 4 |
| 13252100 | 9000_SavorySweet | Coconut custard, Puerto Rican style                                                    | 10 | 1.5 | D | 4 |
| 54102020 | 9000_SavorySweet | Graham crackers, chocolate covered                                                     | 10 | 0.5 | E | 4 |

Supplementary Table 8. Original (uncorrected) scores for all food items.

|          |                  |                                                                                   |    |     |   |   |
|----------|------------------|-----------------------------------------------------------------------------------|----|-----|---|---|
| 53440750 | 9000_SavorySweet | Strudel, pineapple                                                                | 10 | 3.5 | D | 4 |
| 54401121 | 9000_SavorySweet | Tortilla chips, reduced fat, plain                                                | 10 | 3.5 | B | 4 |
| 54401122 | 9000_SavorySweet | Tortilla chips, reduced fat, flavored                                             | 10 | 3.5 | B | 4 |
| 91303500 | 9000_SavorySweet | Sugar, brown, liquid                                                              | 10 | 1.5 | D | 2 |
| 91706400 | 9000_SavorySweet | Coconut candy, Puerto Rican style                                                 | 10 | 0.5 | E | 4 |
| 13130700 | 9000_SavorySweet | Light ice cream, soft serve, blended with candy or cookies                        | 9  | 3.5 | C | 4 |
| 91102010 | 9000_SavorySweet | Sugar, brown                                                                      | 9  | 0.5 | D | 2 |
| 91301120 | 9000_SavorySweet | Sugar, caramelized                                                                | 9  | 0.5 | D | 2 |
| 13120730 | 9000_SavorySweet | Ice cream cone, no topping, flavors other than chocolate                          | 9  | 3.5 | D | 4 |
| 53360000 | 9000_SavorySweet | Pie, sweet potato                                                                 | 9  | 3.5 | D | 4 |
| 54440010 | 9000_SavorySweet | Bagel chips                                                                       | 9  | 3.5 | C | 4 |
| 53306000 | 9000_SavorySweet | Pie, mince, two crust                                                             | 9  | 3   | C | 4 |
| 58123120 | 9000_SavorySweet | Sweet bread dough, filled with bean paste, meatless, steamed                      | 9  | 3   | B | 4 |
| 91501080 | 9000_SavorySweet | Gelatin dessert with fruit and cream cheese                                       | 9  | 4   | B | 4 |
| 13140550 | 9000_SavorySweet | Light ice cream, cone, chocolate                                                  | 9  | 3   | C | 4 |
| 91301200 | 9000_SavorySweet | Sugar, brown, and water syrup                                                     | 9  | 1   | D | 2 |
| 91705090 | 9000_SavorySweet | Chocolate candy with fondant and caramel                                          | 9  | 0.5 | E | 4 |
| 53206500 | 9000_SavorySweet | Cookie, chocolate, made with rice cereal                                          | 9  | 0.5 | E | 4 |
| 54408487 | 9000_SavorySweet | Pretzels, soft, gluten free, coated or flavored                                   | 9  | 2   | D | 4 |
| 53304050 | 9000_SavorySweet | Pie, blueberry, one crust                                                         | 9  | 3   | C | 4 |
| 53118500 | 9000_SavorySweet | Cake, torte                                                                       | 9  | 2   | D | 4 |
| 53208000 | 9000_SavorySweet | Cookie, marshmallow, chocolate-covered                                            | 9  | 1.5 | D | 4 |
| 53208200 | 9000_SavorySweet | Cookie, marshmallow pie, chocolate covered                                        | 9  | 1.5 | D | 4 |
| 53226000 | 9000_SavorySweet | Cookie, marshmallow, with coconut                                                 | 9  | 1.5 | D | 4 |
| 91404000 | 9000_SavorySweet | Marmalade, all flavors                                                            | 9  | 1.5 | D | 3 |
| 53314000 | 9000_SavorySweet | Pie, strawberry, individual size or tart                                          | 9  | 3   | C | 4 |
| 53410800 | 9000_SavorySweet | Cobbler, peach                                                                    | 9  | 3.5 | C | 4 |
| 91707010 | 9000_SavorySweet | Fondant, chocolate covered                                                        | 9  | 1   | D | 4 |
| 53224250 | 9000_SavorySweet | Cookie, lemon bar                                                                 | 9  | 1.5 | D | 4 |
| 63430500 | 9000_SavorySweet | Fruit juice bar with cream, frozen                                                | 8  | 3   | C | 4 |
| 53108220 | 9000_SavorySweet | Snack cake, chocolate, with icing or filling, reduced fat and calories            | 8  | 3.5 | D | 4 |
| 13140450 | 9000_SavorySweet | Light ice cream, cone, NFS                                                        | 8  | 3   | B | 4 |
| 13140500 | 9000_SavorySweet | Light ice cream, cone, flavors other than chocolate                               | 8  | 3   | B | 4 |
| 53390000 | 9000_SavorySweet | Pie, shoo-fly                                                                     | 8  | 1.5 | D | 4 |
| 51161280 | 9000_SavorySweet | Pan Dulce, with raisins and icing                                                 | 8  | 3   | C | 4 |
| 53235500 | 9000_SavorySweet | Cookie, with peanut butter filling, chocolate-coated                              | 8  | 0.5 | E | 4 |
| 13140670 | 9000_SavorySweet | Light ice cream, sundae, soft serve, fruit topping, without whipped cream         | 8  | 3   | C | 4 |
| 53236100 | 9000_SavorySweet | Cookie, pumpkin                                                                   | 8  | 1.5 | D | 4 |
| 53121270 | 9000_SavorySweet | Cake or cupcake, yellow, with icing or filling                                    | 8  | 1.5 | D | 4 |
| 53203000 | 9000_SavorySweet | Cookie, applesauce                                                                | 8  | 1.5 | D | 4 |
| 13252500 | 9000_SavorySweet | Barfi or Burfi, Indian dessert, made from milk and/or cream and/or Ricotta cheese | 8  | 1.5 | D | 4 |
| 53206550 | 9000_SavorySweet | Cookie, chocolate, made with oatmeal and coconut, no bake                         | 8  | 1.5 | D | 4 |
| 53233100 | 9000_SavorySweet | Cookie, oatmeal, with chocolate and peanut butter, no bake                        | 8  | 1.5 | D | 4 |
| 53233010 | 9000_SavorySweet | Cookie, oatmeal, with raisins                                                     | 8  | 1.5 | D | 4 |
| 53233000 | 9000_SavorySweet | Cookie, oatmeal                                                                   | 8  | 1.5 | D | 4 |
| 53385500 | 9000_SavorySweet | Pie, oatmeal                                                                      | 8  | 1.5 | D | 4 |
| 13121100 | 9000_SavorySweet | Ice cream sundae, fruit topping, with whipped cream                               | 8  | 3.5 | D | 4 |
| 91304030 | 9000_SavorySweet | Topping, fruit                                                                    | 8  | 3   | C | 4 |
| 51161270 | 9000_SavorySweet | Pan Dulce, with sugar topping                                                     | 8  | 3   | C | 4 |
| 53209500 | 9000_SavorySweet | Cookie, chocolate and vanilla sandwich                                            | 8  | 1   | E | 4 |
| 53452200 | 9000_SavorySweet | Pastry, Italian, with cheese                                                      | 8  | 3   | C | 4 |
| 53209015 | 9000_SavorySweet | Cookie, chocolate sandwich                                                        | 8  | 1   | E | 4 |
| 53341070 | 9000_SavorySweet | Pie, banana cream, individual size or tart                                        | 8  | 3.5 | C | 4 |
| 54319000 | 9000_SavorySweet | Crackers, rice                                                                    | 8  | 3.5 | B | 4 |
| 91705030 | 9000_SavorySweet | Kit Kat                                                                           | 8  | 0.5 | E | 4 |
| 91705430 | 9000_SavorySweet | Kit Kat White                                                                     | 8  | 0.5 | E | 4 |
| 53206000 | 9000_SavorySweet | Cookie, chocolate chip                                                            | 8  | 1   | E | 4 |
| 53242500 | 9000_SavorySweet | Cookie, toffee bar                                                                | 8  | 1   | E | 4 |
| 53211000 | 9000_SavorySweet | Cookie bar, with chocolate, nuts, and graham crackers                             | 8  | 1   | E | 4 |
| 53108200 | 9000_SavorySweet | Snack cake, chocolate, with icing or filling                                      | 8  | 1.5 | D | 4 |
| 53307050 | 9000_SavorySweet | Pie, peach, one crust                                                             | 8  | 3   | C | 4 |
| 53209020 | 9000_SavorySweet | Cookie, chocolate sandwich, reduced fat                                           | 8  | 1.5 | D | 4 |
| 53200100 | 9000_SavorySweet | Cookie, batter or dough, raw                                                      | 8  | 1   | E | 4 |
| 53521100 | 9000_SavorySweet | Doughnut, chocolate, raised or yeast, with chocolate icing                        | 8  | 1.5 | D | 4 |
| 53260030 | 9000_SavorySweet | Cookie, chocolate chip, sugar free                                                | 8  | 1.5 | D | 4 |
| 13210710 | 9000_SavorySweet | Pudding, cornmeal, milk, and molasses                                             | 8  | 3   | C | 4 |
| 53343070 | 9000_SavorySweet | Pie, coconut cream, individual size or tart                                       | 8  | 3   | C | 4 |
| 13150000 | 9000_SavorySweet | Sherbet, all flavors                                                              | 7  | 3   | C | 4 |
| 13210500 | 9000_SavorySweet | Pudding, tapioca, made from home recipe, made with milk                           | 7  | 3   | C | 4 |
| 53391150 | 9000_SavorySweet | Pie shell, chocolate wafer                                                        | 7  | 1.5 | D | 4 |
| 54313000 | 9000_SavorySweet | Crackers, oyster                                                                  | 7  | 2   | D | 4 |
| 54325000 | 9000_SavorySweet | Crackers, saltine                                                                 | 7  | 2   | D | 4 |
| 53201000 | 9000_SavorySweet | Cookie, NFS                                                                       | 7  | 1   | E | 4 |
| 11461200 | 9000_SavorySweet | Yogurt, frozen, sandwich                                                          | 7  | 3.5 | C | 4 |
| 53209100 | 9000_SavorySweet | Cookie, chocolate, sandwich, with extra filling                                   | 7  | 1   | E | 4 |
| 54406200 | 9000_SavorySweet | Shrimp chips                                                                      | 7  | 2   | D | 4 |
| 53203500 | 9000_SavorySweet | Cookie, biscotti                                                                  | 7  | 2   | D | 4 |
| 53410900 | 9000_SavorySweet | Cobbler, rhubarb                                                                  | 7  | 3.5 | D | 4 |
| 53410880 | 9000_SavorySweet | Cobbler, plum                                                                     | 7  | 3.5 | C | 4 |
| 53430750 | 9000_SavorySweet | Tamale, sweet, with fruit                                                         | 7  | 3.5 | C | 4 |
| 53302000 | 9000_SavorySweet | Pie, apricot, two crust                                                           | 7  | 3   | C | 4 |
| 53347100 | 9000_SavorySweet | Pie, raspberry cream                                                              | 7  | 3   | C | 4 |
| 53205260 | 9000_SavorySweet | Cookie, bar, with chocolate                                                       | 7  | 1   | E | 4 |
| 53420000 | 9000_SavorySweet | Cream puff, eclair, custard or cream filled, NS as to icing                       | 7  | 1.5 | D | 4 |
| 53243010 | 9000_SavorySweet | Cookie, vanilla sandwich, extra filling                                           | 7  | 1   | E | 4 |
| 13140630 | 9000_SavorySweet | Light ice cream, sundae, soft serve, fruit topping, with whipped cream            | 7  | 3.5 | C | 4 |

Supplementary Table 8. Original (uncorrected) scores for all food items.

|          |                  |                                                                                                      |   |     |   |   |
|----------|------------------|------------------------------------------------------------------------------------------------------|---|-----|---|---|
| 13140700 | 9000_SavorySweet | Light ice cream, creamsicle or dreamsicle                                                            | 7 | 3.5 | C | 4 |
| 13161500 | 9000_SavorySweet | Milk dessert sandwich bar, frozen, made from lowfat milk                                             | 7 | 3   | C | 4 |
| 13161520 | 9000_SavorySweet | Milk dessert sandwich bar, frozen, with low-calorie sweetener, made from lowfat milk                 | 7 | 2   | D | 4 |
| 53410850 | 9000_SavorySweet | Cobbler, pear                                                                                        | 7 | 3.5 | C | 4 |
| 13130620 | 9000_SavorySweet | Light ice cream, soft serve cone, flavors other than chocolate                                       | 7 | 3   | C | 4 |
| 13130640 | 9000_SavorySweet | Light ice cream, soft serve cone, NS as to flavor                                                    | 7 | 3   | C | 4 |
| 53121275 | 9000_SavorySweet | Cake or cupcake, yellow, without icing or filling                                                    | 7 | 1.5 | D | 4 |
| 53233060 | 9000_SavorySweet | Cookie, oatmeal, with chocolate chips                                                                | 7 | 1.5 | D | 4 |
| 53303500 | 9000_SavorySweet | Pie, berry, not blackberry, blueberry, boysenberry, huckleberry, raspberry, or strawberry; two crust | 7 | 3   | C | 4 |
| 53440800 | 9000_SavorySweet | Strudel, cheese and fruit                                                                            | 7 | 3   | C | 4 |
| 53100070 | 9000_SavorySweet | Cake batter, raw, not chocolate                                                                      | 7 | 2   | D | 4 |
| 53410500 | 9000_SavorySweet | Cobbler, cherry                                                                                      | 7 | 3.5 | C | 4 |
| 13122500 | 9000_SavorySweet | Ice cream pie, with cookie crust, fudge topping, and whipped cream                                   | 7 | 2   | D | 4 |
| 53345000 | 9000_SavorySweet | Pie, lemon cream                                                                                     | 7 | 2   | D | 4 |
| 53241600 | 9000_SavorySweet | Cookie, butter or sugar, with fruit and/or nuts                                                      | 7 | 1.5 | E | 4 |
| 13210150 | 9000_SavorySweet | Bread pudding made with evaporated milk and rum                                                      | 7 | 2   | D | 4 |
| 53113000 | 9000_SavorySweet | Cake, jelly roll                                                                                     | 6 | 1.5 | D | 4 |
| 53114000 | 9000_SavorySweet | Cake or cupcake, lemon, without icing or filling                                                     | 6 | 1.5 | D | 4 |
| 91800100 | 9000_SavorySweet | Chewing gum, NFS                                                                                     | 6 | 3   | C | 4 |
| 53371000 | 9000_SavorySweet | Pie, chiffon, chocolate                                                                              | 6 | 2   | D | 4 |
| 91703400 | 9000_SavorySweet | Whatchamacallit                                                                                      | 6 | 0.5 | E | 4 |
| 13210180 | 9000_SavorySweet | Pudding, Mexican bread                                                                               | 6 | 2   | D | 4 |
| 58118210 | 9000_SavorySweet | Cornmeal coconut dessert, Puerto Rican style                                                         | 6 | 1   | D | 4 |
| 91713030 | 9000_SavorySweet | Fudge, chocolate                                                                                     | 6 | 0.5 | E | 4 |
| 53204840 | 9000_SavorySweet | Cookie, brownie, reduced fat, NS as to icing                                                         | 6 | 3.5 | D | 4 |
| 53204860 | 9000_SavorySweet | Cookie, brownie, fat free, NS as to icing                                                            | 6 | 3.5 | D | 4 |
| 53348000 | 9000_SavorySweet | Pie, strawberry cream                                                                                | 6 | 3   | C | 4 |
| 13126000 | 9000_SavorySweet | Ice cream, fried                                                                                     | 6 | 2   | D | 4 |
| 91305010 | 9000_SavorySweet | Icing, chocolate                                                                                     | 6 | 0.5 | E | 4 |
| 53237010 | 9000_SavorySweet | Cookie, raisin sandwich, cream-filled                                                                | 6 | 1.5 | D | 4 |
| 53233080 | 9000_SavorySweet | Cookie, oatmeal sandwich, with peanut butter and jelly filling                                       | 6 | 1.5 | D | 4 |
| 53233050 | 9000_SavorySweet | Cookie, oatmeal sandwich, with creme filling                                                         | 6 | 1.5 | D | 4 |
| 13210820 | 9000_SavorySweet | Fresh corn custard, Puerto Rican style                                                               | 6 | 1   | E | 4 |
| 53415400 | 9000_SavorySweet | Crisp, cherry                                                                                        | 6 | 2   | D | 4 |
| 51161250 | 9000_SavorySweet | Pan Dulce, no topping                                                                                | 6 | 3   | B | 4 |
| 53116650 | 9000_SavorySweet | Cake, Quezadilla, El Salvadorian style                                                               | 6 | 3   | B | 4 |
| 53305010 | 9000_SavorySweet | Pie, cherry, one crust                                                                               | 6 | 3.5 | C | 4 |
| 53610200 | 9000_SavorySweet | Coffee cake, crumb or quick-bread type, cheese-filled                                                | 6 | 1.5 | D | 4 |
| 53109300 | 9000_SavorySweet | Cake, Dobos Torte                                                                                    | 6 | 1   | E | 4 |
| 53303570 | 9000_SavorySweet | Pie, berry, not blackberry, blueberry, boysenberry, huckleberry, raspberry, or strawberry, indiv     | 6 | 3.5 | C | 4 |
| 61113500 | 9000_SavorySweet | Lemon pie filling                                                                                    | 6 | 1.5 | D | 4 |
| 53207000 | 9000_SavorySweet | Cookie, chocolate or fudge                                                                           | 6 | 1   | E | 4 |
| 53210000 | 9000_SavorySweet | Cookie, chocolate wafer                                                                              | 6 | 1   | E | 4 |
| 53610100 | 9000_SavorySweet | Coffee cake, crumb or quick-bread type                                                               | 6 | 1.5 | D | 4 |
| 53104550 | 9000_SavorySweet | Cheesecake with fruit                                                                                | 6 | 3   | D | 4 |
| 53304070 | 9000_SavorySweet | Pie, blueberry, individual size or tart                                                              | 6 | 3.5 | C | 4 |
| 53341000 | 9000_SavorySweet | Pie, banana cream                                                                                    | 6 | 3.5 | C | 4 |
| 53348070 | 9000_SavorySweet | Pie, strawberry cream, individual size or tart                                                       | 6 | 3   | C | 4 |
| 53116570 | 9000_SavorySweet | Cake, Ravani                                                                                         | 6 | 2   | D | 4 |
| 53373000 | 9000_SavorySweet | Pie, black bottom                                                                                    | 6 | 2   | D | 4 |
| 13121500 | 9000_SavorySweet | Ice cream sundae, fudge topping, with cake, with whipped cream                                       | 5 | 2   | D | 4 |
| 91726425 | 9000_SavorySweet | 3 Musketeers Truffle Crisp Bar                                                                       | 5 | 0.5 | E | 4 |
| 53386250 | 9000_SavorySweet | Pie, pudding, chocolate, with chocolate coating, individual size                                     | 5 | 1.5 | D | 4 |
| 53115410 | 9000_SavorySweet | Cake or cupcake, oatmeal                                                                             | 5 | 1.5 | D | 4 |
| 53391100 | 9000_SavorySweet | Pie shell, graham cracker                                                                            | 5 | 1.5 | D | 4 |
| 13135010 | 9000_SavorySweet | Ice cream sandwich, made with light chocolate ice cream                                              | 5 | 3.5 | C | 4 |
| 53381000 | 9000_SavorySweet | Pie, lemon meringue                                                                                  | 5 | 3.5 | C | 4 |
| 53381070 | 9000_SavorySweet | Pie, lemon meringue, individual size or tart                                                         | 5 | 3.5 | C | 4 |
| 53224000 | 9000_SavorySweet | Cookie, ladyfinger                                                                                   | 5 | 2   | D | 4 |
| 54308000 | 9000_SavorySweet | Crackers, milk                                                                                       | 5 | 2   | D | 4 |
| 53342070 | 9000_SavorySweet | Pie, chocolate cream, individual size or tart                                                        | 5 | 2   | C | 4 |
| 53112100 | 9000_SavorySweet | Cake, ice cream and cake roll, not chocolate                                                         | 5 | 1.5 | D | 4 |
| 53109220 | 9000_SavorySweet | Snack cake, not chocolate, with icing or filling, reduced fat and calories                           | 5 | 3   | D | 4 |
| 54304100 | 9000_SavorySweet | Crackers, cheese, reduced fat                                                                        | 5 | 1.5 | D | 4 |
| 53238000 | 9000_SavorySweet | Cookie, sandwich-type, not chocolate or vanilla                                                      | 5 | 1.5 | D | 4 |
| 53243000 | 9000_SavorySweet | Cookie, vanilla sandwich                                                                             | 5 | 1.5 | D | 4 |
| 53308500 | 9000_SavorySweet | Pie, prune, one crust                                                                                | 5 | 2   | D | 4 |
| 54102200 | 9000_SavorySweet | Graham crackers, sandwich, with filling                                                              | 5 | 1.5 | D | 4 |
| 53311050 | 9000_SavorySweet | Pie, rhubarb, one crust                                                                              | 5 | 3   | C | 4 |
| 53309070 | 9000_SavorySweet | Pie, raisin, individual size or tart                                                                 | 5 | 3.5 | C | 4 |
| 53247500 | 9000_SavorySweet | Cookie, vanilla with caramel, coconut, and chocolate coating                                         | 5 | 0.5 | E | 4 |
| 13210290 | 9000_SavorySweet | Pudding, flavors other than chocolate, low calorie, containing artificial sweetener, NS as to fror   | 5 | 3   | C | 4 |
| 13230120 | 9000_SavorySweet | Pudding, ready-to-eat, low calorie, containing artificial sweetener, flavors other than chocolate    | 5 | 3   | C | 4 |
| 53309000 | 9000_SavorySweet | Pie, raisin, two crust                                                                               | 5 | 3.5 | C | 4 |
| 53340000 | 9000_SavorySweet | Pie, apple-sour cream                                                                                | 5 | 3.5 | C | 4 |
| 53120275 | 9000_SavorySweet | Cake or cupcake, white, without icing or filling                                                     | 5 | 1.5 | D | 4 |
| 53307000 | 9000_SavorySweet | Pie, peach, two crust                                                                                | 5 | 3   | C | 4 |
| 53345070 | 9000_SavorySweet | Pie, lemon cream, individual size or tart                                                            | 5 | 2   | D | 4 |
| 53610170 | 9000_SavorySweet | Coffee cake, crumb or quick-bread type, with fruit                                                   | 5 | 1.5 | D | 4 |
| 91108010 | 9000_SavorySweet | Sugar substitute, stevia, liquid                                                                     | 5 | 3.5 | B | 4 |
| 91200005 | 9000_SavorySweet | Sugar substitute, liquid, NFS                                                                        | 5 | 3.5 | B | 4 |
| 91351010 | 9000_SavorySweet | Syrup, dietetic                                                                                      | 5 | 3.5 | B | 4 |
| 53313000 | 9000_SavorySweet | Pie, strawberry-rhubarb, two crust                                                                   | 5 | 3   | C | 4 |
| 53226550 | 9000_SavorySweet | Cookie, marshmallow, with rice cereal and chocolate chips                                            | 5 | 0.5 | E | 4 |
| 13170000 | 9000_SavorySweet | Baked Alaska                                                                                         | 4 | 2   | D | 4 |
| 53420100 | 9000_SavorySweet | Cream puff, eclair, custard or cream filled, not iced                                                | 4 | 1.5 | D | 4 |

Supplementary Table 8. Original (uncorrected) scores for all food items.

|          |                  |                                                                                     |   |     |   |   |
|----------|------------------|-------------------------------------------------------------------------------------|---|-----|---|---|
| 53239100 | 9000_SavorySweet | Pocky                                                                               | 4 | 1.5 | D | 4 |
| 53520150 | 9000_SavorySweet | Doughnut, cake type, chocolate covered, dipped in peanuts                           | 4 | 1   | E | 4 |
| 91611050 | 9000_SavorySweet | Ice pop filled with ice cream, all flavor varieties                                 | 4 | 3   | C | 4 |
| 53304000 | 9000_SavorySweet | Pie, blueberry, two crust                                                           | 4 | 3   | C | 4 |
| 53215500 | 9000_SavorySweet | Cookie, coconut                                                                     | 4 | 0.5 | E | 4 |
| 53225000 | 9000_SavorySweet | Cookie, macaroon                                                                    | 4 | 0.5 | E | 4 |
| 13230130 | 9000_SavorySweet | Pudding, ready-to-eat, chocolate                                                    | 4 | 3   | C | 4 |
| 13210220 | 9000_SavorySweet | Pudding, chocolate, NS as to from dry mix or ready-to-eat                           | 4 | 3   | C | 4 |
| 13230500 | 9000_SavorySweet | Pudding, ready-to-eat, tapioca                                                      | 4 | 3   | C | 4 |
| 13200110 | 9000_SavorySweet | Pudding, NFS                                                                        | 4 | 3   | C | 4 |
| 13210190 | 9000_SavorySweet | Pudding, Mexican bread, low fat                                                     | 4 | 2   | D | 4 |
| 53521210 | 9000_SavorySweet | Doughnut, custard-filled                                                            | 4 | 2   | D | 4 |
| 53521120 | 9000_SavorySweet | Doughnut, chocolate, raised or yeast                                                | 4 | 1.5 | D | 4 |
| 53204100 | 9000_SavorySweet | Cookie, brownie, with icing or filling                                              | 4 | 1   | E | 4 |
| 53410100 | 9000_SavorySweet | Cobbler, apple                                                                      | 4 | 3   | C | 4 |
| 13210160 | 9000_SavorySweet | Diplomat pudding, Puerto Rican style                                                | 4 | 1.5 | D | 4 |
| 53116600 | 9000_SavorySweet | Cake, rice flour, without icing or filling                                          | 4 | 2   | D | 4 |
| 53247000 | 9000_SavorySweet | Cookie, vanilla wafer                                                               | 4 | 1.5 | D | 4 |
| 53247050 | 9000_SavorySweet | Cookie, vanilla wafer, reduced fat                                                  | 4 | 1.5 | D | 4 |
| 53450300 | 9000_SavorySweet | Turnover or dumpling, berry                                                         | 4 | 2   | D | 4 |
| 91801000 | 9000_SavorySweet | Chewing gum, regular                                                                | 3 | 1.5 | D | 4 |
| 53386500 | 9000_SavorySweet | Pie, pudding, flavors other than chocolate, with chocolate coating, individual size | 3 | 1.5 | D | 4 |
| 53308300 | 9000_SavorySweet | Pie, plum, two crust                                                                | 3 | 3.5 | D | 4 |
| 91511050 | 9000_SavorySweet | Gelatin dessert, dietetic, with cream cheese, sweetened with low calorie sweetener  | 3 | 3.5 | B | 4 |
| 53420300 | 9000_SavorySweet | Air filled fritter or fried puff, without syrup, Puerto Rican style                 | 3 | 1   | E | 4 |
| 13210410 | 9000_SavorySweet | Pudding, rice                                                                       | 3 | 3   | C | 4 |
| 53106500 | 9000_SavorySweet | Cake, cream, without icing or topping                                               | 3 | 1.5 | E | 4 |
| 13210520 | 9000_SavorySweet | Pudding, tapioca, made from dry mix, made with milk                                 | 3 | 3   | C | 4 |
| 53452130 | 9000_SavorySweet | Pastry, made with bean paste and salted egg yolk filling, baked                     | 3 | 1.5 | D | 4 |
| 53344070 | 9000_SavorySweet | Pie, custard, individual size or tart                                               | 3 | 3   | C | 4 |
| 53510000 | 9000_SavorySweet | Danish pastry, plain or spice                                                       | 3 | 1.5 | D | 4 |
| 91306030 | 9000_SavorySweet | Chocolate dip                                                                       | 3 | 1   | E | 4 |
| 53307070 | 9000_SavorySweet | Pie, peach, individual size or tart                                                 | 3 | 3   | D | 4 |
| 53204000 | 9000_SavorySweet | Cookie, brownie, NS as to icing                                                     | 3 | 1.5 | D | 4 |
| 53204010 | 9000_SavorySweet | Cookie, brownie, without icing                                                      | 3 | 1.5 | D | 4 |
| 53520120 | 9000_SavorySweet | Doughnut, chocolate, cake type                                                      | 3 | 1.5 | D | 4 |
| 91705400 | 9000_SavorySweet | Chocolate, white                                                                    | 3 | 0.5 | E | 4 |
| 53346500 | 9000_SavorySweet | Pie, pineapple cream                                                                | 3 | 3.5 | C | 4 |
| 13252600 | 9000_SavorySweet | Tiramisu                                                                            | 3 | 1   | E | 4 |
| 51187020 | 9000_SavorySweet | Anisette toast                                                                      | 3 | 3   | C | 4 |
| 51188500 | 9000_SavorySweet | Zwieback toast                                                                      | 3 | 3   | C | 4 |
| 91726140 | 9000_SavorySweet | MILKY WAY MIDNIGHT Bar                                                              | 3 | 0.5 | E | 4 |
| 53205250 | 9000_SavorySweet | Cookie, butterscotch, brownie                                                       | 3 | 1.5 | D | 4 |
| 53307500 | 9000_SavorySweet | Pie, pear, two crust                                                                | 3 | 3   | C | 4 |
| 53102800 | 9000_SavorySweet | Cake or cupcake, Black Forest                                                       | 3 | 1.5 | D | 4 |
| 13110120 | 9000_SavorySweet | Ice cream, rich, flavors other than chocolate                                       | 3 | 1.5 | D | 4 |
| 13110140 | 9000_SavorySweet | Ice cream, rich, NS as to flavor                                                    | 3 | 1.5 | D | 4 |
| 53450500 | 9000_SavorySweet | Turnover or dumpling, cherry                                                        | 2 | 3.5 | D | 4 |
| 13120500 | 9000_SavorySweet | Ice cream sandwich                                                                  | 2 | 3.5 | C | 4 |
| 53120270 | 9000_SavorySweet | Cake or cupcake, white, with icing or filling                                       | 2 | 1.5 | D | 4 |
| 53242000 | 9000_SavorySweet | Cookie, sugar wafer                                                                 | 2 | 0.5 | E | 4 |
| 54336000 | 9000_SavorySweet | Crackers, water                                                                     | 2 | 3.5 | B | 4 |
| 53307570 | 9000_SavorySweet | Pie, pear, individual size or tart                                                  | 2 | 3.5 | C | 4 |
| 53311000 | 9000_SavorySweet | Pie, rhubarb, two crust                                                             | 2 | 3   | C | 4 |
| 32120100 | 9000_SavorySweet | Egg dessert, Puerto Rican style                                                     | 2 | 1.5 | D | 4 |
| 53370000 | 9000_SavorySweet | Pie, chiffon, not chocolate                                                         | 2 | 2   | D | 4 |
| 53386000 | 9000_SavorySweet | Pie, pudding, flavors other than chocolate                                          | 2 | 3.5 | C | 4 |
| 53123500 | 9000_SavorySweet | Cake, shortcake, with whipped topping and fruit, diet                               | 2 | 3.5 | D | 4 |
| 53453170 | 9000_SavorySweet | Empanada, Mexican turnover, pumpkin                                                 | 2 | 3   | C | 4 |
| 53451000 | 9000_SavorySweet | Turnover or dumpling, peach                                                         | 2 | 2   | D | 4 |
| 54408475 | 9000_SavorySweet | Pretzels, soft, from school lunch                                                   | 2 | 4   | A | 4 |
| 13252200 | 9000_SavorySweet | Milk dessert or milk candy, Puerto Rican style                                      | 2 | 1.5 | D | 4 |
| 53365000 | 9000_SavorySweet | Pie, vanilla cream                                                                  | 2 | 3.5 | D | 4 |
| 91703040 | 9000_SavorySweet | Caramel candy, chocolate covered                                                    | 2 | 0.5 | E | 4 |
| 53206030 | 9000_SavorySweet | Cookie, chocolate chip, reduced fat                                                 | 2 | 1.5 | D | 4 |
| 91511010 | 9000_SavorySweet | Gelatin dessert, dietetic, sweetened with low calorie sweetener                     | 2 | 3.5 | B | 4 |
| 53301500 | 9000_SavorySweet | Pie, apple, one crust                                                               | 2 | 3   | D | 4 |
| 53306070 | 9000_SavorySweet | Pie, mince, individual size or tart                                                 | 2 | 2   | D | 4 |
| 91301081 | 9000_SavorySweet | Chocolate syrup, thin type, light                                                   | 2 | 3.5 | C | 4 |
| 53239050 | 9000_SavorySweet | Cookie, shortbread, with icing or filling                                           | 2 | 1   | E | 4 |
| 91306040 | 9000_SavorySweet | Dessert dip                                                                         | 2 | 1.5 | D | 4 |
| 53453150 | 9000_SavorySweet | Empanada, Mexican turnover, fruit-filled                                            | 2 | 3.5 | C | 4 |
| 54408030 | 9000_SavorySweet | Pretzels, hard, plain, unsalted                                                     | 2 | 3.5 | A | 4 |
| 53340500 | 9000_SavorySweet | Pie, cherry, made with cream cheese and sour cream                                  | 2 | 2   | D | 4 |
| 13230200 | 9000_SavorySweet | Pudding, ready-to-eat, chocolate and non-chocolate flavors combined                 | 2 | 3   | C | 4 |
| 53511000 | 9000_SavorySweet | Danish pastry, with cheese                                                          | 2 | 2   | D | 4 |
| 53111000 | 9000_SavorySweet | Cake or cupcake, gingerbread                                                        | 2 | 1.5 | D | 4 |
| 13121400 | 9000_SavorySweet | Ice cream sundae, not fruit or chocolate topping, with whipped cream                | 2 | 1.5 | D | 4 |
| 13220110 | 9000_SavorySweet | Pudding, flavors other than chocolate, prepared from dry mix, milk added            | 2 | 3.5 | C | 4 |
| 53410860 | 9000_SavorySweet | Cobbler, pineapple                                                                  | 1 | 3.5 | C | 4 |
| 53207020 | 9000_SavorySweet | Cookie, chocolate or fudge, reduced fat                                             | 1 | 1.5 | D | 4 |
| 53103000 | 9000_SavorySweet | Cake, Boston cream pie                                                              | 1 | 2   | D | 4 |
| 53521140 | 9000_SavorySweet | Doughnut, jelly                                                                     | 1 | 1.5 | D | 4 |
| 53222020 | 9000_SavorySweet | Cookie, cone shell, ice cream type, wafer or cake                                   | 1 | 3.5 | B | 4 |
| 53236000 | 9000_SavorySweet | Cookie, Pizzelle                                                                    | 1 | 3.5 | B | 4 |
| 53391000 | 9000_SavorySweet | Pie shell                                                                           | 1 | 1.5 | D | 4 |

Supplementary Table 8. Original (uncorrected) scores for all food items.

|          |                  |                                                                                            |   |     |   |   |
|----------|------------------|--------------------------------------------------------------------------------------------|---|-----|---|---|
| 53420210 | 9000_SavorySweet | Cream puff, eclair, custard or cream filled, iced, reduced fat                             | 1 | 2   | D | 4 |
| 53420400 | 9000_SavorySweet | Sopaipilla, without syrup or honey                                                         | 1 | 1.5 | D | 4 |
| 51161030 | 9000_SavorySweet | Roll, sweet, with fruit, frosted, diet                                                     | 1 | 0.5 | E | 4 |
| 91723010 | 9000_SavorySweet | Marshmallow, chocolate covered                                                             | 1 | 1   | D | 4 |
| 54319500 | 9000_SavorySweet | Rice paper                                                                                 | 1 | 3.5 | B | 3 |
| 13120310 | 9000_SavorySweet | Ice cream bar, stick or nugget, with crunch coating                                        | 1 | 1   | D | 4 |
| 13120550 | 9000_SavorySweet | Ice cream cookie sandwich                                                                  | 1 | 3   | C | 4 |
| 13135000 | 9000_SavorySweet | Ice cream sandwich, made with light ice cream, flavors other than chocolate                | 1 | 3   | C | 4 |
| 13140650 | 9000_SavorySweet | Light ice cream, sundae, soft serve, not fruit or chocolate topping, with whipped cream    | 1 | 2   | D | 4 |
| 13140680 | 9000_SavorySweet | Light ice cream, sundae, soft serve, not fruit or chocolate topping, without whipped cream | 1 | 3.5 | C | 4 |
| 13210260 | 9000_SavorySweet | Rice flour cream, Puerto Rican style                                                       | 1 | 3.5 | C | 4 |
| 13210280 | 9000_SavorySweet | Pudding, flavors other than chocolate, NS as to from dry mix or ready-to-eat               | 1 | 3.5 | C | 4 |
| 13210350 | 9000_SavorySweet | Flan                                                                                       | 1 | 3.5 | D | 4 |
| 13220240 | 9000_SavorySweet | Pudding, ready-to-eat, flavors other than chocolate, reduced fat                           | 1 | 3   | C | 4 |
| 13220245 | 9000_SavorySweet | Pudding, ready-to-eat, flavors other than chocolate, fat free                              | 1 | 3   | C | 4 |
| 13230110 | 9000_SavorySweet | Pudding, ready-to-eat, flavors other than chocolate                                        | 1 | 3.5 | C | 4 |
| 13230510 | 9000_SavorySweet | Pudding, ready-to-eat, tapioca, fat free                                                   | 1 | 3   | C | 4 |
| 32401000 | 9000_SavorySweet | Meringues                                                                                  | 1 | 1   | D | 4 |
| 51160000 | 9000_SavorySweet | Roll, sweet, no frosting                                                                   | 1 | 3   | C | 4 |
| 51160110 | 9000_SavorySweet | Roll, sweet, cinnamon bun, frosted                                                         | 1 | 0.5 | E | 4 |
| 51166000 | 9000_SavorySweet | Croissant                                                                                  | 1 | 1   | E | 4 |
| 51166100 | 9000_SavorySweet | Croissant, cheese                                                                          | 1 | 1.5 | D | 4 |
| 51166200 | 9000_SavorySweet | Croissant, chocolate                                                                       | 1 | 1   | E | 4 |
| 51166500 | 9000_SavorySweet | Croissant, fruit                                                                           | 1 | 1.5 | D | 4 |
| 51167000 | 9000_SavorySweet | Brioche                                                                                    | 1 | 1   | D | 4 |
| 51187000 | 9000_SavorySweet | Melba toast                                                                                | 1 | 4   | B | 4 |
| 51188100 | 9000_SavorySweet | Pannetone                                                                                  | 1 | 2   | D | 4 |
| 53101100 | 9000_SavorySweet | Cake, angel food, without icing or filling                                                 | 1 | 2   | D | 4 |
| 53101200 | 9000_SavorySweet | Cake, angel food, with icing or filling                                                    | 1 | 1   | E | 4 |
| 53101250 | 9000_SavorySweet | Cake, angel food, with fruit and icing or filling                                          | 1 | 3   | D | 4 |
| 53104400 | 9000_SavorySweet | Cake or cupcake, coconut, with icing or filling                                            | 1 | 1   | E | 4 |
| 53104500 | 9000_SavorySweet | Cheesecake                                                                                 | 1 | 1   | E | 4 |
| 53104600 | 9000_SavorySweet | Cheesecake, chocolate                                                                      | 1 | 1   | E | 4 |
| 53109200 | 9000_SavorySweet | Snack cake, not chocolate, with icing or filling                                           | 1 | 1   | E | 4 |
| 53114100 | 9000_SavorySweet | Cake or cupcake, lemon, with icing or filling                                              | 1 | 1   | E | 4 |
| 53116000 | 9000_SavorySweet | Cake, pound, without icing or filling                                                      | 1 | 1.5 | E | 4 |
| 53116020 | 9000_SavorySweet | Cake, pound, with icing or filling                                                         | 1 | 1   | E | 4 |
| 53116270 | 9000_SavorySweet | Cake, pound, chocolate                                                                     | 1 | 1   | E | 4 |
| 53116350 | 9000_SavorySweet | Cake, pound, Puerto Rican style                                                            | 1 | 0.5 | E | 4 |
| 53116390 | 9000_SavorySweet | Cake, pound, reduced fat, cholesterol free                                                 | 1 | 2   | D | 4 |
| 53118100 | 9000_SavorySweet | Cake, sponge, without icing or filling                                                     | 1 | 1.5 | D | 4 |
| 53118200 | 9000_SavorySweet | Cake, sponge, with icing or filling                                                        | 1 | 1   | E | 4 |
| 53118300 | 9000_SavorySweet | Cake, sponge, chocolate                                                                    | 1 | 1   | E | 4 |
| 53118410 | 9000_SavorySweet | Rum cake, without icing                                                                    | 1 | 1.5 | E | 4 |
| 53118550 | 9000_SavorySweet | Cake, tres leche                                                                           | 1 | 1.5 | D | 4 |
| 53119000 | 9000_SavorySweet | Cake, pineapple, upside down                                                               | 1 | 1   | E | 4 |
| 53122070 | 9000_SavorySweet | Cake, shortcake, biscuit type, with whipped cream and fruit                                | 1 | 2   | D | 4 |
| 53122080 | 9000_SavorySweet | Cake, shortcake, biscuit type, with fruit                                                  | 1 | 3.5 | C | 4 |
| 53123070 | 9000_SavorySweet | Cake, shortcake, sponge type, with whipped cream and fruit                                 | 1 | 2   | D | 4 |
| 53123080 | 9000_SavorySweet | Cake, shortcake, sponge type, with fruit                                                   | 1 | 2   | D | 4 |
| 53202000 | 9000_SavorySweet | Cookie, almond                                                                             | 1 | 1   | E | 4 |
| 53206100 | 9000_SavorySweet | Cookie, chocolate chip sandwich                                                            | 1 | 1   | E | 4 |
| 53207050 | 9000_SavorySweet | Cookie, chocolate, with chocolate filling or coating, fat free                             | 1 | 1.5 | D | 4 |
| 53209005 | 9000_SavorySweet | Cookie, chocolate, with icing or coating                                                   | 1 | 0.5 | E | 4 |
| 53222010 | 9000_SavorySweet | Cookie, fortune                                                                            | 1 | 2   | D | 4 |
| 53223000 | 9000_SavorySweet | Cookie, gingersnaps                                                                        | 1 | 2   | D | 4 |
| 53228000 | 9000_SavorySweet | Cookie, meringue                                                                           | 1 | 0.5 | D | 4 |
| 53230000 | 9000_SavorySweet | Cookie, molasses                                                                           | 1 | 1.5 | D | 4 |
| 53231000 | 9000_SavorySweet | Cookie, Lebkuchen                                                                          | 1 | 1.5 | D | 4 |
| 53235600 | 9000_SavorySweet | Cookie, Pfeffernusse                                                                       | 1 | 1   | E | 4 |
| 53237500 | 9000_SavorySweet | Cookie, rum ball, no bake                                                                  | 1 | 1   | E | 4 |
| 53239000 | 9000_SavorySweet | Cookie, shortbread                                                                         | 1 | 1   | E | 4 |
| 53239010 | 9000_SavorySweet | Cookie, shortbread, reduced fat                                                            | 1 | 1.5 | D | 4 |
| 53240000 | 9000_SavorySweet | Cookie, animal                                                                             | 1 | 1.5 | D | 4 |
| 53240010 | 9000_SavorySweet | Cookie, animal, with frosting or icing                                                     | 1 | 0.5 | E | 4 |
| 53241500 | 9000_SavorySweet | Cookie, butter or sugar                                                                    | 1 | 1   | E | 4 |
| 53241510 | 9000_SavorySweet | Marie biscuit                                                                              | 1 | 1.5 | D | 4 |
| 53243050 | 9000_SavorySweet | Cookie, vanilla sandwich, reduced fat                                                      | 1 | 1.5 | D | 4 |
| 53244010 | 9000_SavorySweet | Cookie, butter or sugar, with chocolate icing or filling                                   | 1 | 0.5 | E | 4 |
| 53244020 | 9000_SavorySweet | Cookie, butter or sugar, with icing or filling other than chocolate                        | 1 | 1   | E | 4 |
| 53246000 | 9000_SavorySweet | Cookie, tea, Japanese                                                                      | 1 | 2   | D | 4 |
| 53261000 | 9000_SavorySweet | Cookie, gluten free                                                                        | 1 | 0.5 | E | 4 |
| 53270100 | 9000_SavorySweet | Cookies, Puerto Rican style                                                                | 1 | 1   | E | 4 |
| 53300100 | 9000_SavorySweet | Pie, NFS                                                                                   | 1 | 3   | C | 4 |
| 53301000 | 9000_SavorySweet | Pie, apple, two crust                                                                      | 1 | 3   | C | 4 |
| 53301750 | 9000_SavorySweet | Pie, apple, diet                                                                           | 1 | 3   | C | 4 |
| 53305000 | 9000_SavorySweet | Pie, cherry, two crust                                                                     | 1 | 3.5 | C | 4 |
| 53305070 | 9000_SavorySweet | Pie, cherry, individual size or tart                                                       | 1 | 3.5 | C | 4 |
| 53305700 | 9000_SavorySweet | Pie, lemon, not cream or meringue                                                          | 1 | 1.5 | D | 4 |
| 53305720 | 9000_SavorySweet | Pie, lemon, not cream or meringue, individual size or tart                                 | 1 | 1.5 | D | 4 |
| 53308000 | 9000_SavorySweet | Pie, pineapple, two crust                                                                  | 1 | 3.5 | C | 4 |
| 53311070 | 9000_SavorySweet | Pie, rhubarb, individual size or tart                                                      | 1 | 2   | D | 4 |
| 53341500 | 9000_SavorySweet | Pie, buttermilk                                                                            | 1 | 1.5 | E | 4 |
| 53341750 | 9000_SavorySweet | Pie, chess                                                                                 | 1 | 0.5 | E | 4 |
| 53342000 | 9000_SavorySweet | Pie, chocolate cream                                                                       | 1 | 1   | E | 4 |
| 53343000 | 9000_SavorySweet | Pie, coconut cream                                                                         | 1 | 2   | D | 4 |

Supplementary Table 8. Original (uncorrected) scores for all food items.

|          |                  |                                                                     |   |     |   |   |
|----------|------------------|---------------------------------------------------------------------|---|-----|---|---|
| 53386050 | 9000_SavorySweet | Pie, pudding, flavors other than chocolate, individual size or tart | 1 | 2   | D | 4 |
| 53391200 | 9000_SavorySweet | Vanilla wafer dessert base                                          | 1 | 1.5 | E | 4 |
| 53420200 | 9000_SavorySweet | Cream puff, eclair, custard or cream filled, iced                   | 1 | 1.5 | D | 4 |
| 53420410 | 9000_SavorySweet | Sopapilla with syrup or honey                                       | 1 | 1.5 | D | 4 |
| 53430700 | 9000_SavorySweet | Tamale, sweet                                                       | 1 | 3.5 | C | 4 |
| 53440600 | 9000_SavorySweet | Strudel, cheese                                                     | 1 | 2   | D | 4 |
| 53450000 | 9000_SavorySweet | Turnover or dumpling, apple                                         | 1 | 2   | D | 4 |
| 53450800 | 9000_SavorySweet | Turnover or dumpling, lemon                                         | 1 | 3.5 | D | 4 |
| 53452500 | 9000_SavorySweet | Pastry, mainly flour and water, fried                               | 1 | 1.5 | D | 4 |
| 53500100 | 9000_SavorySweet | Breakfast pastry, NFS                                               | 1 | 1.5 | D | 4 |
| 53510100 | 9000_SavorySweet | Danish pastry, with fruit                                           | 1 | 1.5 | D | 4 |
| 53520000 | 9000_SavorySweet | Doughnut, NS as to cake or yeast                                    | 1 | 1   | E | 4 |
| 53520110 | 9000_SavorySweet | Doughnut, cake type                                                 | 1 | 1   | E | 4 |
| 53520140 | 9000_SavorySweet | Doughnut, cake type, chocolate covered                              | 1 | 0.5 | E | 4 |
| 53520160 | 9000_SavorySweet | Doughnut, chocolate, cake type, with chocolate icing                | 1 | 0.5 | E | 4 |
| 53520200 | 9000_SavorySweet | Churros                                                             | 1 | 1   | E | 4 |
| 53520500 | 9000_SavorySweet | Doughnut, Asian                                                     | 1 | 1   | E | 4 |
| 53520600 | 9000_SavorySweet | Cruller, NFS                                                        | 1 | 1   | E | 4 |
| 53520700 | 9000_SavorySweet | French cruller                                                      | 1 | 1.5 | D | 4 |
| 53521110 | 9000_SavorySweet | Doughnut, raised or yeast                                           | 1 | 1.5 | E | 4 |
| 53521130 | 9000_SavorySweet | Doughnut, raised or yeast, chocolate covered                        | 1 | 1   | E | 4 |
| 53521220 | 9000_SavorySweet | Doughnut, chocolate cream-filled                                    | 1 | 1.5 | D | 4 |
| 53521230 | 9000_SavorySweet | Doughnut, custard-filled, with icing                                | 1 | 1.5 | E | 4 |
| 53530000 | 9000_SavorySweet | Breakfast tart                                                      | 1 | 1.5 | D | 4 |
| 53530010 | 9000_SavorySweet | Breakfast tart, lowfat                                              | 1 | 3   | C | 4 |
| 54102060 | 9000_SavorySweet | Crackers, Cuban                                                     | 1 | 1.5 | D | 4 |
| 54325010 | 9000_SavorySweet | Crackers, saltine, reduced fat                                      | 1 | 3.5 | C | 4 |
| 54408000 | 9000_SavorySweet | Pretzels, NFS                                                       | 1 | 2   | C | 4 |
| 54408015 | 9000_SavorySweet | Pretzels, hard, NFS                                                 | 1 | 2   | C | 4 |
| 54408016 | 9000_SavorySweet | Pretzels, hard, plain, salted                                       | 1 | 2   | C | 4 |
| 54408017 | 9000_SavorySweet | Pretzels, hard, plain, lightly salted                               | 1 | 3   | C | 4 |
| 54408035 | 9000_SavorySweet | Pretzels, hard, flavored                                            | 1 | 2   | C | 4 |
| 54408070 | 9000_SavorySweet | Pretzels, hard, multigrain                                          | 1 | 2   | C | 4 |
| 54408081 | 9000_SavorySweet | Pretzels, hard, plain, gluten free                                  | 1 | 1   | D | 4 |
| 54408082 | 9000_SavorySweet | Pretzels, hard, flavored, gluten free                               | 1 | 1   | D | 4 |
| 54408105 | 9000_SavorySweet | Pretzel chips, hard, plain                                          | 1 | 1   | C | 4 |
| 54408110 | 9000_SavorySweet | Pretzel chips, hard, flavored                                       | 1 | 0.5 | C | 4 |
| 54408115 | 9000_SavorySweet | Pretzel chips, hard, gluten free                                    | 1 | 0.5 | D | 4 |
| 54408190 | 9000_SavorySweet | Pretzels, hard, coated, NFS                                         | 1 | 1   | E | 4 |
| 54408200 | 9000_SavorySweet | Pretzels, hard, chocolate coated                                    | 1 | 1   | E | 4 |
| 54408210 | 9000_SavorySweet | Pretzels, hard, white chocolate coated                              | 1 | 0.5 | E | 4 |
| 54408250 | 9000_SavorySweet | Pretzels, hard, yogurt coated                                       | 1 | 0.5 | E | 4 |
| 54408260 | 9000_SavorySweet | Pretzels, hard, coated, gluten free                                 | 1 | 0.5 | E | 4 |
| 54408290 | 9000_SavorySweet | Pretzels, hard, filled, NFS                                         | 1 | 0.5 | E | 4 |
| 54408300 | 9000_SavorySweet | Pretzels, hard, cheese filled                                       | 1 | 0.5 | E | 4 |
| 54408400 | 9000_SavorySweet | Pretzels, soft, NFS                                                 | 1 | 2   | D | 4 |
| 54408405 | 9000_SavorySweet | Pretzels, soft, ready-to-eat, NFS                                   | 1 | 2   | D | 4 |
| 54408410 | 9000_SavorySweet | Pretzels, soft, ready-to-eat, salted, buttered                      | 1 | 2   | D | 4 |
| 54408411 | 9000_SavorySweet | Pretzels, soft, ready-to-eat, unsalted, buttered                    | 1 | 3.5 | B | 4 |
| 54408415 | 9000_SavorySweet | Pretzels, soft, ready-to-eat, salted, no butter                     | 1 | 2   | D | 4 |
| 54408416 | 9000_SavorySweet | Pretzels, soft, ready-to-eat, unsalted, no butter                   | 1 | 3.5 | A | 4 |
| 54408420 | 9000_SavorySweet | Pretzels, soft, ready-to-eat, cinnamon sugar coated                 | 1 | 3.5 | C | 4 |
| 54408422 | 9000_SavorySweet | Pretzels, soft, ready-to-eat, coated or flavored                    | 1 | 2   | D | 4 |
| 54408430 | 9000_SavorySweet | Pretzels, soft, ready-to-eat, topped with meat                      | 1 | 3   | C | 4 |
| 54408432 | 9000_SavorySweet | Pretzels, soft, ready-to-eat, topped with cheese                    | 1 | 3.5 | B | 4 |
| 54408450 | 9000_SavorySweet | Pretzels, soft, from frozen, NFS                                    | 1 | 2   | D | 4 |
| 54408455 | 9000_SavorySweet | Pretzels, soft, from frozen, salted                                 | 1 | 2   | D | 4 |
| 54408456 | 9000_SavorySweet | Pretzels, soft, from frozen, unsalted                               | 1 | 3.5 | A | 4 |
| 54408460 | 9000_SavorySweet | Pretzels, soft, from frozen, cinnamon sugar coated                  | 1 | 3.5 | C | 4 |
| 54408462 | 9000_SavorySweet | Pretzels, soft, from frozen, coated or flavored                     | 1 | 2   | D | 4 |
| 54408465 | 9000_SavorySweet | Pretzels, soft, from frozen, topped with meat                       | 1 | 3   | C | 4 |
| 54408466 | 9000_SavorySweet | Pretzels, soft, from frozen, topped with cheese                     | 1 | 3.5 | B | 4 |
| 54408470 | 9000_SavorySweet | Pretzels, soft, filled with cheese                                  | 1 | 3.5 | B | 4 |
| 54408480 | 9000_SavorySweet | Pretzels, soft, multigrain                                          | 1 | 3.5 | A | 4 |
| 54408486 | 9000_SavorySweet | Pretzels, soft, gluten free, cinnamon sugar coated                  | 1 | 2   | D | 4 |
| 58157110 | 9000_SavorySweet | Spicy rice pudding, Puerto Rican style                              | 1 | 3.5 | C | 4 |
| 91101000 | 9000_SavorySweet | Sugar, NFS                                                          | 1 | 0.5 | D | 2 |
| 91101010 | 9000_SavorySweet | Sugar, white, granulated or lump                                    | 1 | 0.5 | D | 2 |
| 91101020 | 9000_SavorySweet | Sugar, white, confectioner's, powdered                              | 1 | 0.5 | D | 2 |
| 91106010 | 9000_SavorySweet | Sugar substitute and sugar blend                                    | 1 | 0.5 | D | 2 |
| 91107000 | 9000_SavorySweet | Sugar substitute, sucralose, powder                                 | 1 | 1   | D | 4 |
| 91200000 | 9000_SavorySweet | Sugar substitute, powder, NFS                                       | 1 | 0.5 | D | 4 |
| 91200040 | 9000_SavorySweet | Sugar substitute, saccharin, powder                                 | 1 | 0.5 | D | 4 |
| 91200110 | 9000_SavorySweet | Sugar substitute, saccharin, liquid                                 | 1 | 3.5 | B | 4 |
| 91201010 | 9000_SavorySweet | Sugar substitute, aspartame, powder                                 | 1 | 1   | D | 4 |
| 91300010 | 9000_SavorySweet | Syrup, NFS                                                          | 1 | 2   | D | 4 |
| 91300100 | 9000_SavorySweet | Pancake syrup, NFS                                                  | 1 | 2   | D | 4 |
| 91301020 | 9000_SavorySweet | Cane and corn pancake syrup                                         | 1 | 3.5 | C | 4 |
| 91301030 | 9000_SavorySweet | Corn syrup, light or dark                                           | 1 | 1   | D | 4 |
| 91301040 | 9000_SavorySweet | Buttered blends syrup                                               | 1 | 1   | D | 4 |
| 91301050 | 9000_SavorySweet | Fruit syrup                                                         | 1 | 1.5 | D | 4 |
| 91301080 | 9000_SavorySweet | Chocolate syrup, thin type                                          | 1 | 1.5 | D | 4 |
| 91301100 | 9000_SavorySweet | Sugar, white, and water syrup                                       | 1 | 1   | D | 2 |
| 91301130 | 9000_SavorySweet | Fruit flavored syrup used for milk beverages                        | 1 | 1.5 | D | 4 |
| 91301250 | 9000_SavorySweet | Maple and corn and/or cane pancake syrup blends                     | 1 | 2   | D | 4 |
| 91301510 | 9000_SavorySweet | Syrup, pancake, reduced calorie                                     | 1 | 3.5 | C | 4 |

Supplementary Table 8. Original (uncorrected) scores for all food items.

|          |                  |                                                                                       |   |     |   |   |
|----------|------------------|---------------------------------------------------------------------------------------|---|-----|---|---|
| 91302020 | 9000_SavorySweet | Agave liquid sweetener                                                                | 1 | 1.5 | D | 4 |
| 91304010 | 9000_SavorySweet | Topping, butterscotch or caramel                                                      | 1 | 1.5 | D | 4 |
| 91304040 | 9000_SavorySweet | Topping, marshmallow                                                                  | 1 | 2   | D | 4 |
| 91304050 | 9000_SavorySweet | Hard sauce                                                                            | 1 | 0.5 | E | 4 |
| 91305020 | 9000_SavorySweet | Icing, white                                                                          | 1 | 1   | E | 4 |
| 91306020 | 9000_SavorySweet | Caramel dip, regular                                                                  | 1 | 0.5 | E | 4 |
| 91306025 | 9000_SavorySweet | Caramel dip, light                                                                    | 1 | 1.5 | D | 4 |
| 91361040 | 9000_SavorySweet | Dessert sauce                                                                         | 1 | 3.5 | C | 4 |
| 91501010 | 9000_SavorySweet | Gelatin dessert                                                                       | 1 | 3   | B | 4 |
| 91501015 | 9000_SavorySweet | Gelatin snacks                                                                        | 1 | 3.5 | C | 4 |
| 91501030 | 9000_SavorySweet | Gelatin dessert with whipped cream                                                    | 1 | 3   | C | 4 |
| 91501050 | 9000_SavorySweet | Gelatin dessert with cream cheese                                                     | 1 | 3   | C | 4 |
| 91501060 | 9000_SavorySweet | Gelatin dessert with sour cream                                                       | 1 | 3   | C | 4 |
| 91501100 | 9000_SavorySweet | Gelatin salad with vegetables                                                         | 1 | 4   | C | 4 |
| 91511030 | 9000_SavorySweet | Gelatin dessert, dietetic, with whipped topping, sweetened with low calorie sweetener | 1 | 3.5 | B | 4 |
| 91512010 | 9000_SavorySweet | Danish dessert pudding                                                                | 1 | 3   | C | 4 |
| 91580000 | 9000_SavorySweet | Gelatin, frozen, whipped, on a stick                                                  | 1 | 3   | B | 4 |
| 91601000 | 9000_SavorySweet | Ice, fruit                                                                            | 1 | 3.5 | C | 4 |
| 91611000 | 9000_SavorySweet | Ice pop                                                                               | 1 | 3   | C | 4 |
| 91621000 | 9000_SavorySweet | Snow cone                                                                             | 1 | 3.5 | C | 4 |
| 91700010 | 9000_SavorySweet | Candy, NFS                                                                            | 1 | 1.5 | D | 4 |
| 91702010 | 9000_SavorySweet | Butterscotch morsels                                                                  | 1 | 0.5 | E | 4 |
| 91703010 | 9000_SavorySweet | Caramel, chocolate-flavored roll                                                      | 1 | 1.5 | D | 4 |
| 91703020 | 9000_SavorySweet | Caramel, flavor other than chocolate                                                  | 1 | 1   | D | 4 |
| 91703070 | 9000_SavorySweet | Rolo                                                                                  | 1 | 0.5 | E | 4 |
| 91703200 | 9000_SavorySweet | TWIX Caramel Cookie Bars                                                              | 1 | 0.5 | E | 4 |
| 91707000 | 9000_SavorySweet | Fondant                                                                               | 1 | 0.5 | D | 4 |
| 91708000 | 9000_SavorySweet | Fruit peel, candied                                                                   | 1 | 1   | D | 4 |
| 91708030 | 9000_SavorySweet | Fruit leather and fruit snacks candy                                                  | 1 | 1.5 | D | 4 |
| 91708040 | 9000_SavorySweet | Fun Fruits Creme Supremes                                                             | 1 | 0.5 | E | 4 |
| 91708070 | 9000_SavorySweet | Tamarind candy                                                                        | 1 | 0.5 | E | 4 |
| 91708100 | 9000_SavorySweet | Fruit snacks candy, with high vitamin C                                               | 1 | 1   | D | 4 |
| 91709000 | 9000_SavorySweet | Gumdrops, chocolate covered                                                           | 1 | 1   | E | 4 |
| 91713070 | 9000_SavorySweet | Fudge, vanilla                                                                        | 1 | 0.5 | D | 4 |
| 91715300 | 9000_SavorySweet | 100 GRAND Bar                                                                         | 1 | 0.5 | E | 4 |
| 91721000 | 9000_SavorySweet | Licorice                                                                              | 1 | 1   | D | 4 |
| 91723000 | 9000_SavorySweet | Marshmallow                                                                           | 1 | 1.5 | D | 4 |
| 91723020 | 9000_SavorySweet | Marshmallow, candy-coated                                                             | 1 | 1   | D | 4 |
| 91723050 | 9000_SavorySweet | Marshmallow, coconut-coated                                                           | 1 | 1   | D | 4 |
| 91726110 | 9000_SavorySweet | Nougat, with caramel, chocolate covered                                               | 1 | 0.5 | E | 4 |
| 91726130 | 9000_SavorySweet | MILKY WAY Bar                                                                         | 1 | 0.5 | E | 4 |
| 91726420 | 9000_SavorySweet | 3 MUSKETEERS Bar                                                                      | 1 | 0.5 | E | 4 |
| 91745010 | 9000_SavorySweet | Gumdrops                                                                              | 1 | 1.5 | D | 4 |
| 91745020 | 9000_SavorySweet | Hard candy                                                                            | 1 | 1.5 | D | 4 |
| 91745040 | 9000_SavorySweet | Butterscotch hard candy                                                               | 1 | 0.5 | E | 4 |
| 91745100 | 9000_SavorySweet | Skittles                                                                              | 1 | 0.5 | E | 4 |
| 91746200 | 9000_SavorySweet | M&M's Pretzel Chocolate Candies                                                       | 1 | 0.5 | E | 4 |
| 91750000 | 9000_SavorySweet | Taffy                                                                                 | 1 | 1   | E | 4 |
| 91760000 | 9000_SavorySweet | Toffee, plain                                                                         | 1 | 1   | D | 4 |
| 91760100 | 9000_SavorySweet | Toffee, chocolate covered                                                             | 1 | 0.5 | E | 4 |
| 91760700 | 9000_SavorySweet | Wax candy, liquid filled                                                              | 1 | 3.5 | C | 2 |
| 91770000 | 9000_SavorySweet | Dietetic or low calorie candy, NFS                                                    | 1 | 3   | C | 4 |
| 91770010 | 9000_SavorySweet | Dietetic or low calorie gumdrops                                                      | 1 | 1   | D | 4 |
| 91770020 | 9000_SavorySweet | Dietetic or low calorie hard candy                                                    | 1 | 3   | C | 4 |
| 91770050 | 9000_SavorySweet | Dietetic or low calorie mints                                                         | 1 | 3   | C | 4 |
